# Supplementary material for: A bZIP transcription factor, PqbZIP1, is involved in the plant defense response of American ginseng
Source: PeerJ journal article supplement (doi:10.7717/peerj.12939), 2022-03-08
Supplement: Raw_Data.zip [file Raw_Data.zip]

## Sheet: TF_classification
#ID	Family	Type
F01_transcript_100506	AGC_MAST	PK
F01_transcript_129212	AGC_MAST	PK
F01_transcript_153	AGC_MAST	PK
F01_transcript_188	AGC_MAST	PK
F01_transcript_68970	AGC_MAST	PK
F01_transcript_104096	AGC_NDR	PK
F01_transcript_10811	AGC_NDR	PK
F01_transcript_125050	AGC_NDR	PK
F01_transcript_130560	AGC_NDR	PK
F01_transcript_137784	AGC_NDR	PK
F01_transcript_33562	AGC_NDR	PK
F01_transcript_34214	AGC_NDR	PK
F01_transcript_53179	AGC_NDR	PK
F01_transcript_57802	AGC_NDR	PK
F01_transcript_60268	AGC_NDR	PK
F01_transcript_60421	AGC_NDR	PK
F01_transcript_6451	AGC_NDR	PK
F01_transcript_66369	AGC_NDR	PK
F01_transcript_7445	AGC_NDR	PK
F01_transcript_7586	AGC_NDR	PK
F01_transcript_8023	AGC_NDR	PK
F01_transcript_8026	AGC_NDR	PK
F01_transcript_8209	AGC_NDR	PK
F01_transcript_8321	AGC_NDR	PK
F01_transcript_8337	AGC_NDR	PK
F01_transcript_86436	AGC_NDR	PK
F01_transcript_91475	AGC_NDR	PK
F01_transcript_94397	AGC_NDR	PK
F01_transcript_9847	AGC_NDR	PK
F01_transcript_34982	AGC_PDK1	PK
F01_transcript_52374	AGC_PDK1	PK
F01_transcript_63373	AGC_PDK1	PK
F01_transcript_125967	AGC_PKA-PKG	PK
F01_transcript_129979	AGC_PKA-PKG	PK
F01_transcript_137534	AGC_PKA-PKG	PK
F01_transcript_141553	AGC_PKA-PKG	PK
F01_transcript_141611	AGC_PKA-PKG	PK
F01_transcript_265	AGC_PKA-PKG	PK
F01_transcript_51481	AGC_PKA-PKG	PK
F01_transcript_105376	AGC_RSK-2	PK
F01_transcript_106300	AGC_RSK-2	PK
F01_transcript_109911	AGC_RSK-2	PK
F01_transcript_116923	AGC_RSK-2	PK
F01_transcript_119251	AGC_RSK-2	PK
F01_transcript_120204	AGC_RSK-2	PK
F01_transcript_124133	AGC_RSK-2	PK
F01_transcript_129793	AGC_RSK-2	PK
F01_transcript_129834	AGC_RSK-2	PK
F01_transcript_131858	AGC_RSK-2	PK
F01_transcript_13447	AGC_RSK-2	PK
F01_transcript_139527	AGC_RSK-2	PK
F01_transcript_139547	AGC_RSK-2	PK
F01_transcript_143538	AGC_RSK-2	PK
F01_transcript_145704	AGC_RSK-2	PK
F01_transcript_1594	AGC_RSK-2	PK
F01_transcript_1630	AGC_RSK-2	PK
F01_transcript_1698	AGC_RSK-2	PK
F01_transcript_1792	AGC_RSK-2	PK
F01_transcript_20631	AGC_RSK-2	PK
F01_transcript_39674	AGC_RSK-2	PK
F01_transcript_41030	AGC_RSK-2	PK
F01_transcript_45434	AGC_RSK-2	PK
F01_transcript_46213	AGC_RSK-2	PK
F01_transcript_50965	AGC_RSK-2	PK
F01_transcript_55755	AGC_RSK-2	PK
F01_transcript_5739	AGC_RSK-2	PK
F01_transcript_58816	AGC_RSK-2	PK
F01_transcript_59009	AGC_RSK-2	PK
F01_transcript_61031	AGC_RSK-2	PK
F01_transcript_62685	AGC_RSK-2	PK
F01_transcript_6402	AGC_RSK-2	PK
F01_transcript_653	AGC_RSK-2	PK
F01_transcript_67883	AGC_RSK-2	PK
F01_transcript_67912	AGC_RSK-2	PK
F01_transcript_68200	AGC_RSK-2	PK
F01_transcript_69141	AGC_RSK-2	PK
F01_transcript_73732	AGC_RSK-2	PK
F01_transcript_7377	AGC_RSK-2	PK
F01_transcript_75460	AGC_RSK-2	PK
F01_transcript_75988	AGC_RSK-2	PK
F01_transcript_78241	AGC_RSK-2	PK
F01_transcript_78585	AGC_RSK-2	PK
F01_transcript_8020	AGC_RSK-2	PK
F01_transcript_80652	AGC_RSK-2	PK
F01_transcript_82266	AGC_RSK-2	PK
F01_transcript_86351	AGC_RSK-2	PK
F01_transcript_89263	AGC_RSK-2	PK
F01_transcript_89666	AGC_RSK-2	PK
F01_transcript_91989	AGC_RSK-2	PK
F01_transcript_98868	AGC_RSK-2	PK
F01_transcript_108052	AGC-Pl	PK
F01_transcript_108787	AGC-Pl	PK
F01_transcript_11496	AGC-Pl	PK
F01_transcript_12581	AGC-Pl	PK
F01_transcript_127420	AGC-Pl	PK
F01_transcript_135397	AGC-Pl	PK
F01_transcript_136502	AGC-Pl	PK
F01_transcript_136737	AGC-Pl	PK
F01_transcript_137991	AGC-Pl	PK
F01_transcript_140403	AGC-Pl	PK
F01_transcript_14999	AGC-Pl	PK
F01_transcript_21194	AGC-Pl	PK
F01_transcript_37363	AGC-Pl	PK
F01_transcript_37614	AGC-Pl	PK
F01_transcript_41559	AGC-Pl	PK
F01_transcript_44309	AGC-Pl	PK
F01_transcript_46755	AGC-Pl	PK
F01_transcript_57607	AGC-Pl	PK
F01_transcript_62052	AGC-Pl	PK
F01_transcript_66052	AGC-Pl	PK
F01_transcript_75058	AGC-Pl	PK
F01_transcript_76299	AGC-Pl	PK
F01_transcript_81333	AGC-Pl	PK
F01_transcript_87863	AGC-Pl	PK
F01_transcript_130464	Alfin-like	TF
F01_transcript_130750	Alfin-like	TF
F01_transcript_139535	Alfin-like	TF
F01_transcript_142994	Alfin-like	TF
F01_transcript_21541	Alfin-like	TF
F01_transcript_21654	Alfin-like	TF
F01_transcript_22117	Alfin-like	TF
F01_transcript_22372	Alfin-like	TF
F01_transcript_22410	Alfin-like	TF
F01_transcript_22855	Alfin-like	TF
F01_transcript_44993	Alfin-like	TF
F01_transcript_48745	Alfin-like	TF
F01_transcript_58809	Alfin-like	TF
F01_transcript_68157	Alfin-like	TF
F01_transcript_70144	Alfin-like	TF
F01_transcript_72516	Alfin-like	TF
F01_transcript_75573	Alfin-like	TF
F01_transcript_84290	Alfin-like	TF
F01_transcript_110441	AP2/ERF-AP2	TF
F01_transcript_113150	AP2/ERF-AP2	TF
F01_transcript_11355	AP2/ERF-AP2	TF
F01_transcript_115168	AP2/ERF-AP2	TF
F01_transcript_115373	AP2/ERF-AP2	TF
F01_transcript_117946	AP2/ERF-AP2	TF
F01_transcript_122131	AP2/ERF-AP2	TF
F01_transcript_122468	AP2/ERF-AP2	TF
F01_transcript_123304	AP2/ERF-AP2	TF
F01_transcript_124358	AP2/ERF-AP2	TF
F01_transcript_13017	AP2/ERF-AP2	TF
F01_transcript_134702	AP2/ERF-AP2	TF
F01_transcript_142899	AP2/ERF-AP2	TF
F01_transcript_143676	AP2/ERF-AP2	TF
F01_transcript_20966	AP2/ERF-AP2	TF
F01_transcript_37289	AP2/ERF-AP2	TF
F01_transcript_40651	AP2/ERF-AP2	TF
F01_transcript_44515	AP2/ERF-AP2	TF
F01_transcript_53058	AP2/ERF-AP2	TF
F01_transcript_54704	AP2/ERF-AP2	TF
F01_transcript_62851	AP2/ERF-AP2	TF
F01_transcript_6360	AP2/ERF-AP2	TF
F01_transcript_70674	AP2/ERF-AP2	TF
F01_transcript_7505	AP2/ERF-AP2	TF
F01_transcript_76430	AP2/ERF-AP2	TF
F01_transcript_77153	AP2/ERF-AP2	TF
F01_transcript_77964	AP2/ERF-AP2	TF
F01_transcript_89752	AP2/ERF-AP2	TF
F01_transcript_9662	AP2/ERF-AP2	TF
F01_transcript_99725	AP2/ERF-AP2	TF
F01_transcript_100228	AP2/ERF-ERF	TF
F01_transcript_100419	AP2/ERF-ERF	TF
F01_transcript_100732	AP2/ERF-ERF	TF
F01_transcript_101282	AP2/ERF-ERF	TF
F01_transcript_102616	AP2/ERF-ERF	TF
F01_transcript_103079	AP2/ERF-ERF	TF
F01_transcript_104667	AP2/ERF-ERF	TF
F01_transcript_105055	AP2/ERF-ERF	TF
F01_transcript_10835	AP2/ERF-ERF	TF
F01_transcript_10948	AP2/ERF-ERF	TF
F01_transcript_109803	AP2/ERF-ERF	TF
F01_transcript_111135	AP2/ERF-ERF	TF
F01_transcript_11125	AP2/ERF-ERF	TF
F01_transcript_111624	AP2/ERF-ERF	TF
F01_transcript_112253	AP2/ERF-ERF	TF
F01_transcript_112833	AP2/ERF-ERF	TF
F01_transcript_112935	AP2/ERF-ERF	TF
F01_transcript_113636	AP2/ERF-ERF	TF
F01_transcript_114548	AP2/ERF-ERF	TF
F01_transcript_116176	AP2/ERF-ERF	TF
F01_transcript_117527	AP2/ERF-ERF	TF
F01_transcript_117985	AP2/ERF-ERF	TF
F01_transcript_11849	AP2/ERF-ERF	TF
F01_transcript_118585	AP2/ERF-ERF	TF
F01_transcript_11918	AP2/ERF-ERF	TF
F01_transcript_119924	AP2/ERF-ERF	TF
F01_transcript_120987	AP2/ERF-ERF	TF
F01_transcript_122171	AP2/ERF-ERF	TF
F01_transcript_122747	AP2/ERF-ERF	TF
F01_transcript_124045	AP2/ERF-ERF	TF
F01_transcript_125287	AP2/ERF-ERF	TF
F01_transcript_125523	AP2/ERF-ERF	TF
F01_transcript_12586	AP2/ERF-ERF	TF
F01_transcript_126969	AP2/ERF-ERF	TF
F01_transcript_127646	AP2/ERF-ERF	TF
F01_transcript_128323	AP2/ERF-ERF	TF
F01_transcript_128629	AP2/ERF-ERF	TF
F01_transcript_12886	AP2/ERF-ERF	TF
F01_transcript_133589	AP2/ERF-ERF	TF
F01_transcript_13385	AP2/ERF-ERF	TF
F01_transcript_134326	AP2/ERF-ERF	TF
F01_transcript_135170	AP2/ERF-ERF	TF
F01_transcript_136904	AP2/ERF-ERF	TF
F01_transcript_137198	AP2/ERF-ERF	TF
F01_transcript_140672	AP2/ERF-ERF	TF
F01_transcript_143190	AP2/ERF-ERF	TF
F01_transcript_143294	AP2/ERF-ERF	TF
F01_transcript_145263	AP2/ERF-ERF	TF
F01_transcript_15598	AP2/ERF-ERF	TF
F01_transcript_16120	AP2/ERF-ERF	TF
F01_transcript_16944	AP2/ERF-ERF	TF
F01_transcript_16982	AP2/ERF-ERF	TF
F01_transcript_17057	AP2/ERF-ERF	TF
F01_transcript_17472	AP2/ERF-ERF	TF
F01_transcript_17696	AP2/ERF-ERF	TF
F01_transcript_18540	AP2/ERF-ERF	TF
F01_transcript_19216	AP2/ERF-ERF	TF
F01_transcript_20209	AP2/ERF-ERF	TF
F01_transcript_21168	AP2/ERF-ERF	TF
F01_transcript_21483	AP2/ERF-ERF	TF
F01_transcript_21794	AP2/ERF-ERF	TF
F01_transcript_21960	AP2/ERF-ERF	TF
F01_transcript_22154	AP2/ERF-ERF	TF
F01_transcript_22281	AP2/ERF-ERF	TF
F01_transcript_23046	AP2/ERF-ERF	TF
F01_transcript_23478	AP2/ERF-ERF	TF
F01_transcript_23775	AP2/ERF-ERF	TF
F01_transcript_24067	AP2/ERF-ERF	TF
F01_transcript_24386	AP2/ERF-ERF	TF
F01_transcript_24511	AP2/ERF-ERF	TF
F01_transcript_24695	AP2/ERF-ERF	TF
F01_transcript_24784	AP2/ERF-ERF	TF
F01_transcript_24849	AP2/ERF-ERF	TF
F01_transcript_24909	AP2/ERF-ERF	TF
F01_transcript_25007	AP2/ERF-ERF	TF
F01_transcript_25084	AP2/ERF-ERF	TF
F01_transcript_25196	AP2/ERF-ERF	TF
F01_transcript_25367	AP2/ERF-ERF	TF
F01_transcript_25402	AP2/ERF-ERF	TF
F01_transcript_26931	AP2/ERF-ERF	TF
F01_transcript_28041	AP2/ERF-ERF	TF
F01_transcript_29426	AP2/ERF-ERF	TF
F01_transcript_35948	AP2/ERF-ERF	TF
F01_transcript_36666	AP2/ERF-ERF	TF
F01_transcript_36762	AP2/ERF-ERF	TF
F01_transcript_37048	AP2/ERF-ERF	TF
F01_transcript_38088	AP2/ERF-ERF	TF
F01_transcript_38155	AP2/ERF-ERF	TF
F01_transcript_38210	AP2/ERF-ERF	TF
F01_transcript_38299	AP2/ERF-ERF	TF
F01_transcript_38436	AP2/ERF-ERF	TF
F01_transcript_42817	AP2/ERF-ERF	TF
F01_transcript_43410	AP2/ERF-ERF	TF
F01_transcript_45196	AP2/ERF-ERF	TF
F01_transcript_45362	AP2/ERF-ERF	TF
F01_transcript_45416	AP2/ERF-ERF	TF
F01_transcript_46594	AP2/ERF-ERF	TF
F01_transcript_49695	AP2/ERF-ERF	TF
F01_transcript_50693	AP2/ERF-ERF	TF
F01_transcript_50861	AP2/ERF-ERF	TF
F01_transcript_50890	AP2/ERF-ERF	TF
F01_transcript_51393	AP2/ERF-ERF	TF
F01_transcript_52045	AP2/ERF-ERF	TF
F01_transcript_53910	AP2/ERF-ERF	TF
F01_transcript_54640	AP2/ERF-ERF	TF
F01_transcript_54985	AP2/ERF-ERF	TF
F01_transcript_55392	AP2/ERF-ERF	TF
F01_transcript_55582	AP2/ERF-ERF	TF
F01_transcript_56035	AP2/ERF-ERF	TF
F01_transcript_56320	AP2/ERF-ERF	TF
F01_transcript_57663	AP2/ERF-ERF	TF
F01_transcript_59073	AP2/ERF-ERF	TF
F01_transcript_60202	AP2/ERF-ERF	TF
F01_transcript_60264	AP2/ERF-ERF	TF
F01_transcript_62467	AP2/ERF-ERF	TF
F01_transcript_62553	AP2/ERF-ERF	TF
F01_transcript_62809	AP2/ERF-ERF	TF
F01_transcript_63798	AP2/ERF-ERF	TF
F01_transcript_63962	AP2/ERF-ERF	TF
F01_transcript_64975	AP2/ERF-ERF	TF
F01_transcript_65100	AP2/ERF-ERF	TF
F01_transcript_65803	AP2/ERF-ERF	TF
F01_transcript_65822	AP2/ERF-ERF	TF
F01_transcript_66243	AP2/ERF-ERF	TF
F01_transcript_66320	AP2/ERF-ERF	TF
F01_transcript_67031	AP2/ERF-ERF	TF
F01_transcript_67452	AP2/ERF-ERF	TF
F01_transcript_68326	AP2/ERF-ERF	TF
F01_transcript_6915	AP2/ERF-ERF	TF
F01_transcript_69322	AP2/ERF-ERF	TF
F01_transcript_70208	AP2/ERF-ERF	TF
F01_transcript_7139	AP2/ERF-ERF	TF
F01_transcript_73946	AP2/ERF-ERF	TF
F01_transcript_76358	AP2/ERF-ERF	TF
F01_transcript_77215	AP2/ERF-ERF	TF
F01_transcript_77542	AP2/ERF-ERF	TF
F01_transcript_77789	AP2/ERF-ERF	TF
F01_transcript_77819	AP2/ERF-ERF	TF
F01_transcript_7829	AP2/ERF-ERF	TF
F01_transcript_79567	AP2/ERF-ERF	TF
F01_transcript_79953	AP2/ERF-ERF	TF
F01_transcript_81066	AP2/ERF-ERF	TF
F01_transcript_83145	AP2/ERF-ERF	TF
F01_transcript_85314	AP2/ERF-ERF	TF
F01_transcript_85926	AP2/ERF-ERF	TF
F01_transcript_86880	AP2/ERF-ERF	TF
F01_transcript_87967	AP2/ERF-ERF	TF
F01_transcript_88752	AP2/ERF-ERF	TF
F01_transcript_8917	AP2/ERF-ERF	TF
F01_transcript_92630	AP2/ERF-ERF	TF
F01_transcript_92865	AP2/ERF-ERF	TF
F01_transcript_93863	AP2/ERF-ERF	TF
F01_transcript_94306	AP2/ERF-ERF	TF
F01_transcript_94594	AP2/ERF-ERF	TF
F01_transcript_95113	AP2/ERF-ERF	TF
F01_transcript_97594	AP2/ERF-ERF	TF
F01_transcript_9798	AP2/ERF-ERF	TF
F01_transcript_98921	AP2/ERF-ERF	TF
F01_transcript_98978	AP2/ERF-ERF	TF
F01_transcript_99091	AP2/ERF-ERF	TF
F01_transcript_56354	AP2/ERF-RAV	TF
F01_transcript_59422	AP2/ERF-RAV	TF
F01_transcript_104716	ARID	TR
F01_transcript_11391	ARID	TR
F01_transcript_115058	ARID	TR
F01_transcript_130218	ARID	TR
F01_transcript_137130	ARID	TR
F01_transcript_13818	ARID	TR
F01_transcript_139676	ARID	TR
F01_transcript_20793	ARID	TR
F01_transcript_2341	ARID	TR
F01_transcript_41841	ARID	TR
F01_transcript_42937	ARID	TR
F01_transcript_69547	ARID	TR
F01_transcript_70562	ARID	TR
F01_transcript_73836	ARID	TR
F01_transcript_74137	ARID	TR
F01_transcript_76658	ARID	TR
F01_transcript_81999	ARID	TR
F01_transcript_86077	ARID	TR
F01_transcript_87722	ARID	TR
F01_transcript_90107	ARID	TR
F01_transcript_91347	ARID	TR
F01_transcript_97653	ARID	TR
F01_transcript_55297	Aur	PK
F01_transcript_100220	AUX/IAA	TR
F01_transcript_101095	AUX/IAA	TR
F01_transcript_103468	AUX/IAA	TR
F01_transcript_105526	AUX/IAA	TR
F01_transcript_105910	AUX/IAA	TR
F01_transcript_106512	AUX/IAA	TR
F01_transcript_106534	AUX/IAA	TR
F01_transcript_108386	AUX/IAA	TR
F01_transcript_108525	AUX/IAA	TR
F01_transcript_109710	AUX/IAA	TR
F01_transcript_110082	AUX/IAA	TR
F01_transcript_113027	AUX/IAA	TR
F01_transcript_113210	AUX/IAA	TR
F01_transcript_114868	AUX/IAA	TR
F01_transcript_116882	AUX/IAA	TR
F01_transcript_117885	AUX/IAA	TR
F01_transcript_119381	AUX/IAA	TR
F01_transcript_119578	AUX/IAA	TR
F01_transcript_120532	AUX/IAA	TR
F01_transcript_123969	AUX/IAA	TR
F01_transcript_126163	AUX/IAA	TR
F01_transcript_126412	AUX/IAA	TR
F01_transcript_126853	AUX/IAA	TR
F01_transcript_127493	AUX/IAA	TR
F01_transcript_129089	AUX/IAA	TR
F01_transcript_130570	AUX/IAA	TR
F01_transcript_132107	AUX/IAA	TR
F01_transcript_133845	AUX/IAA	TR
F01_transcript_134915	AUX/IAA	TR
F01_transcript_137437	AUX/IAA	TR
F01_transcript_139476	AUX/IAA	TR
F01_transcript_141363	AUX/IAA	TR
F01_transcript_141447	AUX/IAA	TR
F01_transcript_141888	AUX/IAA	TR
F01_transcript_142700	AUX/IAA	TR
F01_transcript_145090	AUX/IAA	TR
F01_transcript_15155	AUX/IAA	TR
F01_transcript_15685	AUX/IAA	TR
F01_transcript_16326	AUX/IAA	TR
F01_transcript_16387	AUX/IAA	TR
F01_transcript_16513	AUX/IAA	TR
F01_transcript_16893	AUX/IAA	TR
F01_transcript_18187	AUX/IAA	TR
F01_transcript_18390	AUX/IAA	TR
F01_transcript_18403	AUX/IAA	TR
F01_transcript_18711	AUX/IAA	TR
F01_transcript_23695	AUX/IAA	TR
F01_transcript_23958	AUX/IAA	TR
F01_transcript_24269	AUX/IAA	TR
F01_transcript_276	AUX/IAA	TR
F01_transcript_30163	AUX/IAA	TR
F01_transcript_37056	AUX/IAA	TR
F01_transcript_39236	AUX/IAA	TR
F01_transcript_40048	AUX/IAA	TR
F01_transcript_40396	AUX/IAA	TR
F01_transcript_43068	AUX/IAA	TR
F01_transcript_43831	AUX/IAA	TR
F01_transcript_44428	AUX/IAA	TR
F01_transcript_48736	AUX/IAA	TR
F01_transcript_48966	AUX/IAA	TR
F01_transcript_52371	AUX/IAA	TR
F01_transcript_53230	AUX/IAA	TR
F01_transcript_54472	AUX/IAA	TR
F01_transcript_55498	AUX/IAA	TR
F01_transcript_55687	AUX/IAA	TR
F01_transcript_57178	AUX/IAA	TR
F01_transcript_57712	AUX/IAA	TR
F01_transcript_58786	AUX/IAA	TR
F01_transcript_59085	AUX/IAA	TR
F01_transcript_59197	AUX/IAA	TR
F01_transcript_59600	AUX/IAA	TR
F01_transcript_60122	AUX/IAA	TR
F01_transcript_64915	AUX/IAA	TR
F01_transcript_65937	AUX/IAA	TR
F01_transcript_67639	AUX/IAA	TR
F01_transcript_70838	AUX/IAA	TR
F01_transcript_71616	AUX/IAA	TR
F01_transcript_72638	AUX/IAA	TR
F01_transcript_73981	AUX/IAA	TR
F01_transcript_75279	AUX/IAA	TR
F01_transcript_75317	AUX/IAA	TR
F01_transcript_76864	AUX/IAA	TR
F01_transcript_76977	AUX/IAA	TR
F01_transcript_77260	AUX/IAA	TR
F01_transcript_77601	AUX/IAA	TR
F01_transcript_79680	AUX/IAA	TR
F01_transcript_81919	AUX/IAA	TR
F01_transcript_82209	AUX/IAA	TR
F01_transcript_82847	AUX/IAA	TR
F01_transcript_83810	AUX/IAA	TR
F01_transcript_85664	AUX/IAA	TR
F01_transcript_85698	AUX/IAA	TR
F01_transcript_88754	AUX/IAA	TR
F01_transcript_89524	AUX/IAA	TR
F01_transcript_9020	AUX/IAA	TR
F01_transcript_90902	AUX/IAA	TR
F01_transcript_90992	AUX/IAA	TR
F01_transcript_91071	AUX/IAA	TR
F01_transcript_91158	AUX/IAA	TR
F01_transcript_91407	AUX/IAA	TR
F01_transcript_92044	AUX/IAA	TR
F01_transcript_93408	AUX/IAA	TR
F01_transcript_104453	B3	TF
F01_transcript_105904	B3	TF
F01_transcript_105906	B3	TF
F01_transcript_106284	B3	TF
F01_transcript_108718	B3	TF
F01_transcript_109945	B3	TF
F01_transcript_109955	B3	TF
F01_transcript_112855	B3	TF
F01_transcript_115582	B3	TF
F01_transcript_118999	B3	TF
F01_transcript_119606	B3	TF
F01_transcript_122296	B3	TF
F01_transcript_122874	B3	TF
F01_transcript_123094	B3	TF
F01_transcript_127095	B3	TF
F01_transcript_12729	B3	TF
F01_transcript_127653	B3	TF
F01_transcript_128483	B3	TF
F01_transcript_128799	B3	TF
F01_transcript_128858	B3	TF
F01_transcript_1292	B3	TF
F01_transcript_133378	B3	TF
F01_transcript_134334	B3	TF
F01_transcript_137691	B3	TF
F01_transcript_145268	B3	TF
F01_transcript_145655	B3	TF
F01_transcript_145683	B3	TF
F01_transcript_1519	B3	TF
F01_transcript_17488	B3	TF
F01_transcript_19439	B3	TF
F01_transcript_19773	B3	TF
F01_transcript_2005	B3	TF
F01_transcript_20543	B3	TF
F01_transcript_2395	B3	TF
F01_transcript_37666	B3	TF
F01_transcript_43536	B3	TF
F01_transcript_44092	B3	TF
F01_transcript_44303	B3	TF
F01_transcript_47316	B3	TF
F01_transcript_48091	B3	TF
F01_transcript_49808	B3	TF
F01_transcript_50733	B3	TF
F01_transcript_54017	B3	TF
F01_transcript_54061	B3	TF
F01_transcript_58191	B3	TF
F01_transcript_66290	B3	TF
F01_transcript_69644	B3	TF
F01_transcript_78415	B3	TF
F01_transcript_79552	B3	TF
F01_transcript_83249	B3	TF
F01_transcript_84582	B3	TF
F01_transcript_86191	B3	TF
F01_transcript_911	B3	TF
F01_transcript_91489	B3	TF
F01_transcript_91518	B3	TF
F01_transcript_94211	B3	TF
F01_transcript_98703	B3	TF
F01_transcript_99718	B3	TF
F01_transcript_101824	B3-ARF	TF
F01_transcript_104035	B3-ARF	TF
F01_transcript_106343	B3-ARF	TF
F01_transcript_107135	B3-ARF	TF
F01_transcript_1105	B3-ARF	TF
F01_transcript_11095	B3-ARF	TF
F01_transcript_114263	B3-ARF	TF
F01_transcript_12005	B3-ARF	TF
F01_transcript_1214	B3-ARF	TF
F01_transcript_121927	B3-ARF	TF
F01_transcript_124594	B3-ARF	TF
F01_transcript_1255	B3-ARF	TF
F01_transcript_126565	B3-ARF	TF
F01_transcript_127512	B3-ARF	TF
F01_transcript_129133	B3-ARF	TF
F01_transcript_1304	B3-ARF	TF
F01_transcript_132998	B3-ARF	TF
F01_transcript_134069	B3-ARF	TF
F01_transcript_134695	B3-ARF	TF
F01_transcript_1349	B3-ARF	TF
F01_transcript_138387	B3-ARF	TF
F01_transcript_138459	B3-ARF	TF
F01_transcript_140289	B3-ARF	TF
F01_transcript_145643	B3-ARF	TF
F01_transcript_1462	B3-ARF	TF
F01_transcript_1487	B3-ARF	TF
F01_transcript_1562	B3-ARF	TF
F01_transcript_1600	B3-ARF	TF
F01_transcript_1666	B3-ARF	TF
F01_transcript_1681	B3-ARF	TF
F01_transcript_2017	B3-ARF	TF
F01_transcript_213	B3-ARF	TF
F01_transcript_219	B3-ARF	TF
F01_transcript_248	B3-ARF	TF
F01_transcript_306	B3-ARF	TF
F01_transcript_322	B3-ARF	TF
F01_transcript_3243	B3-ARF	TF
F01_transcript_333	B3-ARF	TF
F01_transcript_3345	B3-ARF	TF
F01_transcript_33765	B3-ARF	TF
F01_transcript_34401	B3-ARF	TF
F01_transcript_3518	B3-ARF	TF
F01_transcript_3528	B3-ARF	TF
F01_transcript_3897	B3-ARF	TF
F01_transcript_40956	B3-ARF	TF
F01_transcript_42398	B3-ARF	TF
F01_transcript_4259	B3-ARF	TF
F01_transcript_42631	B3-ARF	TF
F01_transcript_43161	B3-ARF	TF
F01_transcript_47151	B3-ARF	TF
F01_transcript_48095	B3-ARF	TF
F01_transcript_49999	B3-ARF	TF
F01_transcript_52142	B3-ARF	TF
F01_transcript_53001	B3-ARF	TF
F01_transcript_56772	B3-ARF	TF
F01_transcript_58875	B3-ARF	TF
F01_transcript_62032	B3-ARF	TF
F01_transcript_64771	B3-ARF	TF
F01_transcript_70274	B3-ARF	TF
F01_transcript_70414	B3-ARF	TF
F01_transcript_75541	B3-ARF	TF
F01_transcript_76860	B3-ARF	TF
F01_transcript_78396	B3-ARF	TF
F01_transcript_79130	B3-ARF	TF
F01_transcript_80287	B3-ARF	TF
F01_transcript_83896	B3-ARF	TF
F01_transcript_88195	B3-ARF	TF
F01_transcript_88524	B3-ARF	TF
F01_transcript_92030	B3-ARF	TF
F01_transcript_94339	B3-ARF	TF
F01_transcript_95676	B3-ARF	TF
F01_transcript_99296	B3-ARF	TF
F01_transcript_99421	B3-ARF	TF
F01_transcript_11294	BBR-BPC	TF
F01_transcript_123340	BBR-BPC	TF
F01_transcript_13371	BBR-BPC	TF
F01_transcript_135757	BBR-BPC	TF
F01_transcript_142353	BBR-BPC	TF
F01_transcript_143702	BBR-BPC	TF
F01_transcript_145064	BBR-BPC	TF
F01_transcript_15815	BBR-BPC	TF
F01_transcript_19473	BBR-BPC	TF
F01_transcript_20769	BBR-BPC	TF
F01_transcript_39110	BBR-BPC	TF
F01_transcript_51365	BBR-BPC	TF
F01_transcript_52389	BBR-BPC	TF
F01_transcript_54356	BBR-BPC	TF
F01_transcript_57573	BBR-BPC	TF
F01_transcript_58204	BBR-BPC	TF
F01_transcript_60272	BBR-BPC	TF
F01_transcript_62100	BBR-BPC	TF
F01_transcript_62848	BBR-BPC	TF
F01_transcript_64041	BBR-BPC	TF
F01_transcript_76520	BBR-BPC	TF
F01_transcript_77323	BBR-BPC	TF
F01_transcript_88685	BBR-BPC	TF
F01_transcript_90179	BBR-BPC	TF
F01_transcript_96756	BBR-BPC	TF
F01_transcript_111898	BES1	TF
F01_transcript_126843	BES1	TF
F01_transcript_132744	BES1	TF
F01_transcript_140092	BES1	TF
F01_transcript_16019	BES1	TF
F01_transcript_18431	BES1	TF
F01_transcript_18563	BES1	TF
F01_transcript_18827	BES1	TF
F01_transcript_20197	BES1	TF
F01_transcript_3287	BES1	TF
F01_transcript_33611	BES1	TF
F01_transcript_48273	BES1	TF
F01_transcript_53170	BES1	TF
F01_transcript_57029	BES1	TF
F01_transcript_57948	BES1	TF
F01_transcript_63983	BES1	TF
F01_transcript_94145	BES1	TF
F01_transcript_94953	BES1	TF
F01_transcript_96504	BES1	TF
F01_transcript_100014	bHLH	TF
F01_transcript_101948	bHLH	TF
F01_transcript_102302	bHLH	TF
F01_transcript_102482	bHLH	TF
F01_transcript_102636	bHLH	TF
F01_transcript_105391	bHLH	TF
F01_transcript_105898	bHLH	TF
F01_transcript_107297	bHLH	TF
F01_transcript_107683	bHLH	TF
F01_transcript_108950	bHLH	TF
F01_transcript_109539	bHLH	TF
F01_transcript_11022	bHLH	TF
F01_transcript_111282	bHLH	TF
F01_transcript_111395	bHLH	TF
F01_transcript_112506	bHLH	TF
F01_transcript_112538	bHLH	TF
F01_transcript_11257	bHLH	TF
F01_transcript_112652	bHLH	TF
F01_transcript_112936	bHLH	TF
F01_transcript_114030	bHLH	TF
F01_transcript_115277	bHLH	TF
F01_transcript_115583	bHLH	TF
F01_transcript_11593	bHLH	TF
F01_transcript_117735	bHLH	TF
F01_transcript_117847	bHLH	TF
F01_transcript_118219	bHLH	TF
F01_transcript_118656	bHLH	TF
F01_transcript_119548	bHLH	TF
F01_transcript_119632	bHLH	TF
F01_transcript_120860	bHLH	TF
F01_transcript_122060	bHLH	TF
F01_transcript_123021	bHLH	TF
F01_transcript_124174	bHLH	TF
F01_transcript_125671	bHLH	TF
F01_transcript_126462	bHLH	TF
F01_transcript_126918	bHLH	TF
F01_transcript_12782	bHLH	TF
F01_transcript_128514	bHLH	TF
F01_transcript_128522	bHLH	TF
F01_transcript_129860	bHLH	TF
F01_transcript_13041	bHLH	TF
F01_transcript_131242	bHLH	TF
F01_transcript_132310	bHLH	TF
F01_transcript_132644	bHLH	TF
F01_transcript_133063	bHLH	TF
F01_transcript_133935	bHLH	TF
F01_transcript_134748	bHLH	TF
F01_transcript_135701	bHLH	TF
F01_transcript_137243	bHLH	TF
F01_transcript_137937	bHLH	TF
F01_transcript_138465	bHLH	TF
F01_transcript_138648	bHLH	TF
F01_transcript_138792	bHLH	TF
F01_transcript_138876	bHLH	TF
F01_transcript_139390	bHLH	TF
F01_transcript_139885	bHLH	TF
F01_transcript_140324	bHLH	TF
F01_transcript_140986	bHLH	TF
F01_transcript_141529	bHLH	TF
F01_transcript_141559	bHLH	TF
F01_transcript_144722	bHLH	TF
F01_transcript_15931	bHLH	TF
F01_transcript_17219	bHLH	TF
F01_transcript_18032	bHLH	TF
F01_transcript_18505	bHLH	TF
F01_transcript_18990	bHLH	TF
F01_transcript_19500	bHLH	TF
F01_transcript_19797	bHLH	TF
F01_transcript_20194	bHLH	TF
F01_transcript_2049	bHLH	TF
F01_transcript_20877	bHLH	TF
F01_transcript_23334	bHLH	TF
F01_transcript_23337	bHLH	TF
F01_transcript_24342	bHLH	TF
F01_transcript_24361	bHLH	TF
F01_transcript_34755	bHLH	TF
F01_transcript_37299	bHLH	TF
F01_transcript_39360	bHLH	TF
F01_transcript_3951	bHLH	TF
F01_transcript_39839	bHLH	TF
F01_transcript_40754	bHLH	TF
F01_transcript_4130	bHLH	TF
F01_transcript_42050	bHLH	TF
F01_transcript_42672	bHLH	TF
F01_transcript_43242	bHLH	TF
F01_transcript_44135	bHLH	TF
F01_transcript_44712	bHLH	TF
F01_transcript_45310	bHLH	TF
F01_transcript_46112	bHLH	TF
F01_transcript_47445	bHLH	TF
F01_transcript_47981	bHLH	TF
F01_transcript_48313	bHLH	TF
F01_transcript_49153	bHLH	TF
F01_transcript_49318	bHLH	TF
F01_transcript_49443	bHLH	TF
F01_transcript_49586	bHLH	TF
F01_transcript_50506	bHLH	TF
F01_transcript_51115	bHLH	TF
F01_transcript_51137	bHLH	TF
F01_transcript_53241	bHLH	TF
F01_transcript_53848	bHLH	TF
F01_transcript_54530	bHLH	TF
F01_transcript_56582	bHLH	TF
F01_transcript_57649	bHLH	TF
F01_transcript_57931	bHLH	TF
F01_transcript_58343	bHLH	TF
F01_transcript_59341	bHLH	TF
F01_transcript_61704	bHLH	TF
F01_transcript_62936	bHLH	TF
F01_transcript_63340	bHLH	TF
F01_transcript_63563	bHLH	TF
F01_transcript_63855	bHLH	TF
F01_transcript_64443	bHLH	TF
F01_transcript_6453	bHLH	TF
F01_transcript_65750	bHLH	TF
F01_transcript_65814	bHLH	TF
F01_transcript_66106	bHLH	TF
F01_transcript_67339	bHLH	TF
F01_transcript_67444	bHLH	TF
F01_transcript_67448	bHLH	TF
F01_transcript_69444	bHLH	TF
F01_transcript_69498	bHLH	TF
F01_transcript_70669	bHLH	TF
F01_transcript_70750	bHLH	TF
F01_transcript_70919	bHLH	TF
F01_transcript_71059	bHLH	TF
F01_transcript_72473	bHLH	TF
F01_transcript_72906	bHLH	TF
F01_transcript_74175	bHLH	TF
F01_transcript_74406	bHLH	TF
F01_transcript_74960	bHLH	TF
F01_transcript_7552	bHLH	TF
F01_transcript_76346	bHLH	TF
F01_transcript_7661	bHLH	TF
F01_transcript_76933	bHLH	TF
F01_transcript_77454	bHLH	TF
F01_transcript_7756	bHLH	TF
F01_transcript_78819	bHLH	TF
F01_transcript_78889	bHLH	TF
F01_transcript_79540	bHLH	TF
F01_transcript_79739	bHLH	TF
F01_transcript_80297	bHLH	TF
F01_transcript_80506	bHLH	TF
F01_transcript_8089	bHLH	TF
F01_transcript_80945	bHLH	TF
F01_transcript_81378	bHLH	TF
F01_transcript_81737	bHLH	TF
F01_transcript_82522	bHLH	TF
F01_transcript_8360	bHLH	TF
F01_transcript_83989	bHLH	TF
F01_transcript_84512	bHLH	TF
F01_transcript_84770	bHLH	TF
F01_transcript_85900	bHLH	TF
F01_transcript_85964	bHLH	TF
F01_transcript_86078	bHLH	TF
F01_transcript_8680	bHLH	TF
F01_transcript_87445	bHLH	TF
F01_transcript_87525	bHLH	TF
F01_transcript_87824	bHLH	TF
F01_transcript_88949	bHLH	TF
F01_transcript_89109	bHLH	TF
F01_transcript_89822	bHLH	TF
F01_transcript_9015	bHLH	TF
F01_transcript_94047	bHLH	TF
F01_transcript_95283	bHLH	TF
F01_transcript_95848	bHLH	TF
F01_transcript_96247	bHLH	TF
F01_transcript_97209	bHLH	TF
F01_transcript_97410	bHLH	TF
F01_transcript_97963	bHLH	TF
F01_transcript_98084	bHLH	TF
F01_transcript_98567	bHLH	TF
F01_transcript_116548	BSD	TF
F01_transcript_123524	BSD	TF
F01_transcript_133442	BSD	TF
F01_transcript_139310	BUB	PK
F01_transcript_87100	BUB	PK
F01_transcript_100797	bZIP	TF
F01_transcript_101169	bZIP	TF
F01_transcript_102056	bZIP	TF
F01_transcript_104757	bZIP	TF
F01_transcript_106066	bZIP	TF
F01_transcript_10718	bZIP	TF
F01_transcript_109682	bZIP	TF
F01_transcript_110222	bZIP	TF
F01_transcript_111323	bZIP	TF
F01_transcript_11235	bZIP	TF
F01_transcript_11300	bZIP	TF
F01_transcript_113144	bZIP	TF
F01_transcript_113247	bZIP	TF
F01_transcript_113487	bZIP	TF
F01_transcript_114197	bZIP	TF
F01_transcript_115345	bZIP	TF
F01_transcript_116346	bZIP	TF
F01_transcript_116684	bZIP	TF
F01_transcript_118787	bZIP	TF
F01_transcript_119087	bZIP	TF
F01_transcript_11934	bZIP	TF
F01_transcript_119792	bZIP	TF
F01_transcript_121524	bZIP	TF
F01_transcript_121642	bZIP	TF
F01_transcript_121734	bZIP	TF
F01_transcript_121985	bZIP	TF
F01_transcript_124065	bZIP	TF
F01_transcript_127446	bZIP	TF
F01_transcript_128152	bZIP	TF
F01_transcript_12848	bZIP	TF
F01_transcript_128841	bZIP	TF
F01_transcript_129210	bZIP	TF
F01_transcript_129280	bZIP	TF
F01_transcript_12939	bZIP	TF
F01_transcript_129556	bZIP	TF
F01_transcript_130488	bZIP	TF
F01_transcript_13049	bZIP	TF
F01_transcript_130762	bZIP	TF
F01_transcript_13166	bZIP	TF
F01_transcript_131769	bZIP	TF
F01_transcript_132021	bZIP	TF
F01_transcript_133035	bZIP	TF
F01_transcript_135628	bZIP	TF
F01_transcript_137552	bZIP	TF
F01_transcript_139544	bZIP	TF
F01_transcript_140164	bZIP	TF
F01_transcript_143153	bZIP	TF
F01_transcript_143267	bZIP	TF
F01_transcript_143752	bZIP	TF
F01_transcript_14380	bZIP	TF
F01_transcript_143854	bZIP	TF
F01_transcript_143976	bZIP	TF
F01_transcript_143984	bZIP	TF
F01_transcript_145576	bZIP	TF
F01_transcript_14755	bZIP	TF
F01_transcript_14869	bZIP	TF
F01_transcript_14916	bZIP	TF
F01_transcript_15278	bZIP	TF
F01_transcript_15479	bZIP	TF
F01_transcript_16807	bZIP	TF
F01_transcript_17836	bZIP	TF
F01_transcript_19095	bZIP	TF
F01_transcript_19843	bZIP	TF
F01_transcript_20242	bZIP	TF
F01_transcript_20711	bZIP	TF
F01_transcript_21125	bZIP	TF
F01_transcript_21615	bZIP	TF
F01_transcript_22458	bZIP	TF
F01_transcript_22766	bZIP	TF
F01_transcript_22881	bZIP	TF
F01_transcript_24780	bZIP	TF
F01_transcript_29125	bZIP	TF
F01_transcript_3374	bZIP	TF
F01_transcript_34682	bZIP	TF
F01_transcript_35148	bZIP	TF
F01_transcript_35198	bZIP	TF
F01_transcript_35230	bZIP	TF
F01_transcript_35244	bZIP	TF
F01_transcript_35456	bZIP	TF
F01_transcript_35527	bZIP	TF
F01_transcript_36834	bZIP	TF
F01_transcript_37044	bZIP	TF
F01_transcript_37376	bZIP	TF
F01_transcript_37578	bZIP	TF
F01_transcript_38289	bZIP	TF
F01_transcript_39468	bZIP	TF
F01_transcript_39640	bZIP	TF
F01_transcript_39753	bZIP	TF
F01_transcript_42143	bZIP	TF
F01_transcript_4219	bZIP	TF
F01_transcript_42308	bZIP	TF
F01_transcript_42654	bZIP	TF
F01_transcript_43180	bZIP	TF
F01_transcript_44753	bZIP	TF
F01_transcript_44888	bZIP	TF
F01_transcript_4755	bZIP	TF
F01_transcript_50163	bZIP	TF
F01_transcript_50696	bZIP	TF
F01_transcript_50746	bZIP	TF
F01_transcript_51017	bZIP	TF
F01_transcript_52163	bZIP	TF
F01_transcript_53450	bZIP	TF
F01_transcript_54527	bZIP	TF
F01_transcript_54847	bZIP	TF
F01_transcript_54879	bZIP	TF
F01_transcript_5542	bZIP	TF
F01_transcript_56402	bZIP	TF
F01_transcript_57017	bZIP	TF
F01_transcript_5822	bZIP	TF
F01_transcript_58933	bZIP	TF
F01_transcript_59554	bZIP	TF
F01_transcript_60701	bZIP	TF
F01_transcript_60975	bZIP	TF
F01_transcript_62664	bZIP	TF
F01_transcript_66247	bZIP	TF
F01_transcript_66285	bZIP	TF
F01_transcript_6651	bZIP	TF
F01_transcript_66709	bZIP	TF
F01_transcript_67130	bZIP	TF
F01_transcript_67270	bZIP	TF
F01_transcript_68764	bZIP	TF
F01_transcript_6989	bZIP	TF
F01_transcript_71007	bZIP	TF
F01_transcript_71135	bZIP	TF
F01_transcript_71300	bZIP	TF
F01_transcript_71988	bZIP	TF
F01_transcript_73201	bZIP	TF
F01_transcript_73304	bZIP	TF
F01_transcript_75835	bZIP	TF
F01_transcript_76585	bZIP	TF
F01_transcript_78775	bZIP	TF
F01_transcript_8166	bZIP	TF
F01_transcript_81683	bZIP	TF
F01_transcript_83730	bZIP	TF
F01_transcript_83847	bZIP	TF
F01_transcript_84451	bZIP	TF
F01_transcript_84492	bZIP	TF
F01_transcript_85019	bZIP	TF
F01_transcript_86478	bZIP	TF
F01_transcript_86945	bZIP	TF
F01_transcript_87598	bZIP	TF
F01_transcript_87624	bZIP	TF
F01_transcript_87675	bZIP	TF
F01_transcript_88318	bZIP	TF
F01_transcript_88651	bZIP	TF
F01_transcript_88902	bZIP	TF
F01_transcript_89305	bZIP	TF
F01_transcript_91678	bZIP	TF
F01_transcript_92756	bZIP	TF
F01_transcript_93549	bZIP	TF
F01_transcript_93864	bZIP	TF
F01_transcript_94175	bZIP	TF
F01_transcript_96227	bZIP	TF
F01_transcript_96432	bZIP	TF
F01_transcript_96550	bZIP	TF
F01_transcript_9800	bZIP	TF
F01_transcript_9885	bZIP	TF
F01_transcript_100050	C2C2-CO-like	TF
F01_transcript_102008	C2C2-CO-like	TF
F01_transcript_108478	C2C2-CO-like	TF
F01_transcript_123682	C2C2-CO-like	TF
F01_transcript_17058	C2C2-CO-like	TF
F01_transcript_19654	C2C2-CO-like	TF
F01_transcript_19893	C2C2-CO-like	TF
F01_transcript_20721	C2C2-CO-like	TF
F01_transcript_21213	C2C2-CO-like	TF
F01_transcript_50199	C2C2-CO-like	TF
F01_transcript_51297	C2C2-CO-like	TF
F01_transcript_53324	C2C2-CO-like	TF
F01_transcript_65833	C2C2-CO-like	TF
F01_transcript_6770	C2C2-CO-like	TF
F01_transcript_7578	C2C2-CO-like	TF
F01_transcript_90565	C2C2-CO-like	TF
F01_transcript_93996	C2C2-CO-like	TF
F01_transcript_102591	C2C2-Dof	TF
F01_transcript_104122	C2C2-Dof	TF
F01_transcript_10743	C2C2-Dof	TF
F01_transcript_111291	C2C2-Dof	TF
F01_transcript_111833	C2C2-Dof	TF
F01_transcript_115925	C2C2-Dof	TF
F01_transcript_116400	C2C2-Dof	TF
F01_transcript_118552	C2C2-Dof	TF
F01_transcript_121821	C2C2-Dof	TF
F01_transcript_133132	C2C2-Dof	TF
F01_transcript_136730	C2C2-Dof	TF
F01_transcript_139057	C2C2-Dof	TF
F01_transcript_141150	C2C2-Dof	TF
F01_transcript_142363	C2C2-Dof	TF
F01_transcript_18242	C2C2-Dof	TF
F01_transcript_19686	C2C2-Dof	TF
F01_transcript_20156	C2C2-Dof	TF
F01_transcript_20515	C2C2-Dof	TF
F01_transcript_20627	C2C2-Dof	TF
F01_transcript_20854	C2C2-Dof	TF
F01_transcript_21097	C2C2-Dof	TF
F01_transcript_21170	C2C2-Dof	TF
F01_transcript_21526	C2C2-Dof	TF
F01_transcript_34042	C2C2-Dof	TF
F01_transcript_35055	C2C2-Dof	TF
F01_transcript_35674	C2C2-Dof	TF
F01_transcript_37977	C2C2-Dof	TF
F01_transcript_40313	C2C2-Dof	TF
F01_transcript_40935	C2C2-Dof	TF
F01_transcript_49587	C2C2-Dof	TF
F01_transcript_72401	C2C2-Dof	TF
F01_transcript_77755	C2C2-Dof	TF
F01_transcript_7917	C2C2-Dof	TF
F01_transcript_81872	C2C2-Dof	TF
F01_transcript_86445	C2C2-Dof	TF
F01_transcript_86765	C2C2-Dof	TF
F01_transcript_94342	C2C2-Dof	TF
F01_transcript_9658	C2C2-Dof	TF
F01_transcript_96934	C2C2-Dof	TF
F01_transcript_97446	C2C2-Dof	TF
F01_transcript_97692	C2C2-Dof	TF
F01_transcript_97830	C2C2-Dof	TF
F01_transcript_97876	C2C2-Dof	TF
F01_transcript_100649	C2C2-GATA	TF
F01_transcript_102643	C2C2-GATA	TF
F01_transcript_105619	C2C2-GATA	TF
F01_transcript_106676	C2C2-GATA	TF
F01_transcript_107049	C2C2-GATA	TF
F01_transcript_107574	C2C2-GATA	TF
F01_transcript_109791	C2C2-GATA	TF
F01_transcript_109942	C2C2-GATA	TF
F01_transcript_114650	C2C2-GATA	TF
F01_transcript_117341	C2C2-GATA	TF
F01_transcript_117871	C2C2-GATA	TF
F01_transcript_119409	C2C2-GATA	TF
F01_transcript_121699	C2C2-GATA	TF
F01_transcript_121935	C2C2-GATA	TF
F01_transcript_122576	C2C2-GATA	TF
F01_transcript_122989	C2C2-GATA	TF
F01_transcript_126513	C2C2-GATA	TF
F01_transcript_128260	C2C2-GATA	TF
F01_transcript_12872	C2C2-GATA	TF
F01_transcript_129740	C2C2-GATA	TF
F01_transcript_129766	C2C2-GATA	TF
F01_transcript_132927	C2C2-GATA	TF
F01_transcript_135634	C2C2-GATA	TF
F01_transcript_139205	C2C2-GATA	TF
F01_transcript_143249	C2C2-GATA	TF
F01_transcript_18118	C2C2-GATA	TF
F01_transcript_18937	C2C2-GATA	TF
F01_transcript_20715	C2C2-GATA	TF
F01_transcript_21142	C2C2-GATA	TF
F01_transcript_23458	C2C2-GATA	TF
F01_transcript_24377	C2C2-GATA	TF
F01_transcript_26452	C2C2-GATA	TF
F01_transcript_36990	C2C2-GATA	TF
F01_transcript_3833	C2C2-GATA	TF
F01_transcript_38358	C2C2-GATA	TF
F01_transcript_42991	C2C2-GATA	TF
F01_transcript_44966	C2C2-GATA	TF
F01_transcript_46803	C2C2-GATA	TF
F01_transcript_47081	C2C2-GATA	TF
F01_transcript_49120	C2C2-GATA	TF
F01_transcript_49659	C2C2-GATA	TF
F01_transcript_51479	C2C2-GATA	TF
F01_transcript_51484	C2C2-GATA	TF
F01_transcript_53765	C2C2-GATA	TF
F01_transcript_56061	C2C2-GATA	TF
F01_transcript_5616	C2C2-GATA	TF
F01_transcript_57713	C2C2-GATA	TF
F01_transcript_58289	C2C2-GATA	TF
F01_transcript_5920	C2C2-GATA	TF
F01_transcript_60235	C2C2-GATA	TF
F01_transcript_64629	C2C2-GATA	TF
F01_transcript_66333	C2C2-GATA	TF
F01_transcript_71385	C2C2-GATA	TF
F01_transcript_72024	C2C2-GATA	TF
F01_transcript_73733	C2C2-GATA	TF
F01_transcript_74002	C2C2-GATA	TF
F01_transcript_77192	C2C2-GATA	TF
F01_transcript_78334	C2C2-GATA	TF
F01_transcript_81336	C2C2-GATA	TF
F01_transcript_81598	C2C2-GATA	TF
F01_transcript_81749	C2C2-GATA	TF
F01_transcript_82665	C2C2-GATA	TF
F01_transcript_84390	C2C2-GATA	TF
F01_transcript_84633	C2C2-GATA	TF
F01_transcript_86317	C2C2-GATA	TF
F01_transcript_86883	C2C2-GATA	TF
F01_transcript_88516	C2C2-GATA	TF
F01_transcript_95217	C2C2-GATA	TF
F01_transcript_98817	C2C2-GATA	TF
F01_transcript_99850	C2C2-GATA	TF
F01_transcript_13867	C2C2-LSD	TF
F01_transcript_138729	C2C2-LSD	TF
F01_transcript_139834	C2C2-LSD	TF
F01_transcript_23329	C2C2-LSD	TF
F01_transcript_23732	C2C2-LSD	TF
F01_transcript_23735	C2C2-LSD	TF
F01_transcript_34333	C2C2-LSD	TF
F01_transcript_58711	C2C2-LSD	TF
F01_transcript_66981	C2C2-LSD	TF
F01_transcript_67695	C2C2-LSD	TF
F01_transcript_69580	C2C2-LSD	TF
F01_transcript_70007	C2C2-LSD	TF
F01_transcript_80222	C2C2-LSD	TF
F01_transcript_99706	C2C2-LSD	TF
F01_transcript_109126	C2C2-YABBY	TF
F01_transcript_45683	C2C2-YABBY	TF
F01_transcript_100612	C2H2	TF
F01_transcript_102393	C2H2	TF
F01_transcript_103311	C2H2	TF
F01_transcript_105199	C2H2	TF
F01_transcript_105435	C2H2	TF
F01_transcript_110138	C2H2	TF
F01_transcript_111845	C2H2	TF
F01_transcript_112474	C2H2	TF
F01_transcript_113095	C2H2	TF
F01_transcript_113513	C2H2	TF
F01_transcript_113531	C2H2	TF
F01_transcript_114515	C2H2	TF
F01_transcript_115348	C2H2	TF
F01_transcript_115954	C2H2	TF
F01_transcript_116442	C2H2	TF
F01_transcript_116986	C2H2	TF
F01_transcript_117334	C2H2	TF
F01_transcript_117797	C2H2	TF
F01_transcript_118136	C2H2	TF
F01_transcript_12002	C2H2	TF
F01_transcript_121989	C2H2	TF
F01_transcript_122565	C2H2	TF
F01_transcript_123169	C2H2	TF
F01_transcript_124306	C2H2	TF
F01_transcript_125431	C2H2	TF
F01_transcript_127471	C2H2	TF
F01_transcript_127767	C2H2	TF
F01_transcript_127978	C2H2	TF
F01_transcript_128122	C2H2	TF
F01_transcript_128431	C2H2	TF
F01_transcript_129026	C2H2	TF
F01_transcript_129319	C2H2	TF
F01_transcript_131362	C2H2	TF
F01_transcript_135992	C2H2	TF
F01_transcript_136624	C2H2	TF
F01_transcript_139481	C2H2	TF
F01_transcript_139515	C2H2	TF
F01_transcript_140084	C2H2	TF
F01_transcript_142409	C2H2	TF
F01_transcript_144724	C2H2	TF
F01_transcript_14477	C2H2	TF
F01_transcript_16302	C2H2	TF
F01_transcript_16727	C2H2	TF
F01_transcript_17809	C2H2	TF
F01_transcript_18503	C2H2	TF
F01_transcript_18791	C2H2	TF
F01_transcript_19127	C2H2	TF
F01_transcript_19876	C2H2	TF
F01_transcript_20104	C2H2	TF
F01_transcript_20850	C2H2	TF
F01_transcript_21227	C2H2	TF
F01_transcript_21268	C2H2	TF
F01_transcript_21539	C2H2	TF
F01_transcript_21841	C2H2	TF
F01_transcript_22473	C2H2	TF
F01_transcript_234	C2H2	TF
F01_transcript_24100	C2H2	TF
F01_transcript_25105	C2H2	TF
F01_transcript_25370	C2H2	TF
F01_transcript_2654	C2H2	TF
F01_transcript_27066	C2H2	TF
F01_transcript_34006	C2H2	TF
F01_transcript_34213	C2H2	TF
F01_transcript_3470	C2H2	TF
F01_transcript_35912	C2H2	TF
F01_transcript_35972	C2H2	TF
F01_transcript_36617	C2H2	TF
F01_transcript_3698	C2H2	TF
F01_transcript_39986	C2H2	TF
F01_transcript_40435	C2H2	TF
F01_transcript_40537	C2H2	TF
F01_transcript_4120	C2H2	TF
F01_transcript_41837	C2H2	TF
F01_transcript_41895	C2H2	TF
F01_transcript_42136	C2H2	TF
F01_transcript_42569	C2H2	TF
F01_transcript_44849	C2H2	TF
F01_transcript_45275	C2H2	TF
F01_transcript_46104	C2H2	TF
F01_transcript_49369	C2H2	TF
F01_transcript_50028	C2H2	TF
F01_transcript_50977	C2H2	TF
F01_transcript_5150	C2H2	TF
F01_transcript_53766	C2H2	TF
F01_transcript_54018	C2H2	TF
F01_transcript_54142	C2H2	TF
F01_transcript_55052	C2H2	TF
F01_transcript_55768	C2H2	TF
F01_transcript_5578	C2H2	TF
F01_transcript_5661	C2H2	TF
F01_transcript_56777	C2H2	TF
F01_transcript_58741	C2H2	TF
F01_transcript_59247	C2H2	TF
F01_transcript_61494	C2H2	TF
F01_transcript_6248	C2H2	TF
F01_transcript_65326	C2H2	TF
F01_transcript_65848	C2H2	TF
F01_transcript_66574	C2H2	TF
F01_transcript_67419	C2H2	TF
F01_transcript_6781	C2H2	TF
F01_transcript_68211	C2H2	TF
F01_transcript_68623	C2H2	TF
F01_transcript_72049	C2H2	TF
F01_transcript_72179	C2H2	TF
F01_transcript_72184	C2H2	TF
F01_transcript_7322	C2H2	TF
F01_transcript_73779	C2H2	TF
F01_transcript_76179	C2H2	TF
F01_transcript_76799	C2H2	TF
F01_transcript_80191	C2H2	TF
F01_transcript_82597	C2H2	TF
F01_transcript_84468	C2H2	TF
F01_transcript_84702	C2H2	TF
F01_transcript_85441	C2H2	TF
F01_transcript_86676	C2H2	TF
F01_transcript_87079	C2H2	TF
F01_transcript_87922	C2H2	TF
F01_transcript_8811	C2H2	TF
F01_transcript_88394	C2H2	TF
F01_transcript_88569	C2H2	TF
F01_transcript_89516	C2H2	TF
F01_transcript_91972	C2H2	TF
F01_transcript_92265	C2H2	TF
F01_transcript_92623	C2H2	TF
F01_transcript_93155	C2H2	TF
F01_transcript_93954	C2H2	TF
F01_transcript_94097	C2H2	TF
F01_transcript_94515	C2H2	TF
F01_transcript_95604	C2H2	TF
F01_transcript_96628	C2H2	TF
F01_transcript_97877	C2H2	TF
F01_transcript_98114	C2H2	TF
F01_transcript_98847	C2H2	TF
F01_transcript_99281	C2H2	TF
F01_transcript_99755	C2H2	TF
F01_transcript_99999	C2H2	TF
F01_transcript_100121	C3H	TF
F01_transcript_100241	C3H	TF
F01_transcript_100636	C3H	TF
F01_transcript_100998	C3H	TF
F01_transcript_10144	C3H	TF
F01_transcript_101696	C3H	TF
F01_transcript_101731	C3H	TF
F01_transcript_102328	C3H	TF
F01_transcript_102488	C3H	TF
F01_transcript_10401	C3H	TF
F01_transcript_104361	C3H	TF
F01_transcript_104928	C3H	TF
F01_transcript_10544	C3H	TF
F01_transcript_106675	C3H	TF
F01_transcript_10719	C3H	TF
F01_transcript_107438	C3H	TF
F01_transcript_108190	C3H	TF
F01_transcript_108574	C3H	TF
F01_transcript_108575	C3H	TF
F01_transcript_108602	C3H	TF
F01_transcript_108638	C3H	TF
F01_transcript_108702	C3H	TF
F01_transcript_108719	C3H	TF
F01_transcript_109711	C3H	TF
F01_transcript_110043	C3H	TF
F01_transcript_11123	C3H	TF
F01_transcript_112304	C3H	TF
F01_transcript_112907	C3H	TF
F01_transcript_115888	C3H	TF
F01_transcript_116280	C3H	TF
F01_transcript_11660	C3H	TF
F01_transcript_117000	C3H	TF
F01_transcript_117060	C3H	TF
F01_transcript_120097	C3H	TF
F01_transcript_121351	C3H	TF
F01_transcript_122332	C3H	TF
F01_transcript_12269	C3H	TF
F01_transcript_122987	C3H	TF
F01_transcript_123557	C3H	TF
F01_transcript_123983	C3H	TF
F01_transcript_125680	C3H	TF
F01_transcript_125904	C3H	TF
F01_transcript_126159	C3H	TF
F01_transcript_12624	C3H	TF
F01_transcript_126377	C3H	TF
F01_transcript_126882	C3H	TF
F01_transcript_127065	C3H	TF
F01_transcript_127394	C3H	TF
F01_transcript_128059	C3H	TF
F01_transcript_128070	C3H	TF
F01_transcript_128638	C3H	TF
F01_transcript_128728	C3H	TF
F01_transcript_128824	C3H	TF
F01_transcript_129199	C3H	TF
F01_transcript_12921	C3H	TF
F01_transcript_129405	C3H	TF
F01_transcript_129417	C3H	TF
F01_transcript_129746	C3H	TF
F01_transcript_130349	C3H	TF
F01_transcript_130673	C3H	TF
F01_transcript_131383	C3H	TF
F01_transcript_132802	C3H	TF
F01_transcript_135872	C3H	TF
F01_transcript_135940	C3H	TF
F01_transcript_136196	C3H	TF
F01_transcript_13645	C3H	TF
F01_transcript_138419	C3H	TF
F01_transcript_138804	C3H	TF
F01_transcript_139696	C3H	TF
F01_transcript_140197	C3H	TF
F01_transcript_140696	C3H	TF
F01_transcript_141649	C3H	TF
F01_transcript_142076	C3H	TF
F01_transcript_142479	C3H	TF
F01_transcript_142674	C3H	TF
F01_transcript_143352	C3H	TF
F01_transcript_144250	C3H	TF
F01_transcript_145009	C3H	TF
F01_transcript_145254	C3H	TF
F01_transcript_14744	C3H	TF
F01_transcript_14837	C3H	TF
F01_transcript_14930	C3H	TF
F01_transcript_15090	C3H	TF
F01_transcript_15092	C3H	TF
F01_transcript_15378	C3H	TF
F01_transcript_15663	C3H	TF
F01_transcript_159	C3H	TF
F01_transcript_15902	C3H	TF
F01_transcript_16146	C3H	TF
F01_transcript_16198	C3H	TF
F01_transcript_16745	C3H	TF
F01_transcript_16912	C3H	TF
F01_transcript_17244	C3H	TF
F01_transcript_18419	C3H	TF
F01_transcript_19306	C3H	TF
F01_transcript_19494	C3H	TF
F01_transcript_1960	C3H	TF
F01_transcript_2014	C3H	TF
F01_transcript_20201	C3H	TF
F01_transcript_20256	C3H	TF
F01_transcript_2048	C3H	TF
F01_transcript_20809	C3H	TF
F01_transcript_21049	C3H	TF
F01_transcript_22708	C3H	TF
F01_transcript_2323	C3H	TF
F01_transcript_2419	C3H	TF
F01_transcript_2493	C3H	TF
F01_transcript_2633	C3H	TF
F01_transcript_2651	C3H	TF
F01_transcript_270	C3H	TF
F01_transcript_2701	C3H	TF
F01_transcript_2946	C3H	TF
F01_transcript_3091	C3H	TF
F01_transcript_3340	C3H	TF
F01_transcript_3409	C3H	TF
F01_transcript_35104	C3H	TF
F01_transcript_35531	C3H	TF
F01_transcript_357	C3H	TF
F01_transcript_3598	C3H	TF
F01_transcript_3617	C3H	TF
F01_transcript_37031	C3H	TF
F01_transcript_3865	C3H	TF
F01_transcript_39771	C3H	TF
F01_transcript_40079	C3H	TF
F01_transcript_41170	C3H	TF
F01_transcript_41244	C3H	TF
F01_transcript_41400	C3H	TF
F01_transcript_42047	C3H	TF
F01_transcript_43788	C3H	TF
F01_transcript_44645	C3H	TF
F01_transcript_45495	C3H	TF
F01_transcript_4657	C3H	TF
F01_transcript_46630	C3H	TF
F01_transcript_46729	C3H	TF
F01_transcript_47340	C3H	TF
F01_transcript_4871	C3H	TF
F01_transcript_49425	C3H	TF
F01_transcript_49621	C3H	TF
F01_transcript_51713	C3H	TF
F01_transcript_53802	C3H	TF
F01_transcript_54846	C3H	TF
F01_transcript_5490	C3H	TF
F01_transcript_5494	C3H	TF
F01_transcript_56865	C3H	TF
F01_transcript_56955	C3H	TF
F01_transcript_58432	C3H	TF
F01_transcript_59849	C3H	TF
F01_transcript_60033	C3H	TF
F01_transcript_60886	C3H	TF
F01_transcript_61051	C3H	TF
F01_transcript_6109	C3H	TF
F01_transcript_61258	C3H	TF
F01_transcript_6221	C3H	TF
F01_transcript_62256	C3H	TF
F01_transcript_63324	C3H	TF
F01_transcript_64227	C3H	TF
F01_transcript_65071	C3H	TF
F01_transcript_65370	C3H	TF
F01_transcript_6833	C3H	TF
F01_transcript_69345	C3H	TF
F01_transcript_69381	C3H	TF
F01_transcript_69760	C3H	TF
F01_transcript_69858	C3H	TF
F01_transcript_71864	C3H	TF
F01_transcript_72047	C3H	TF
F01_transcript_72356	C3H	TF
F01_transcript_7243	C3H	TF
F01_transcript_72768	C3H	TF
F01_transcript_7293	C3H	TF
F01_transcript_73113	C3H	TF
F01_transcript_73297	C3H	TF
F01_transcript_73645	C3H	TF
F01_transcript_74204	C3H	TF
F01_transcript_74642	C3H	TF
F01_transcript_75888	C3H	TF
F01_transcript_75989	C3H	TF
F01_transcript_76248	C3H	TF
F01_transcript_7662	C3H	TF
F01_transcript_7812	C3H	TF
F01_transcript_79200	C3H	TF
F01_transcript_81540	C3H	TF
F01_transcript_8224	C3H	TF
F01_transcript_82916	C3H	TF
F01_transcript_8302	C3H	TF
F01_transcript_83374	C3H	TF
F01_transcript_83610	C3H	TF
F01_transcript_84940	C3H	TF
F01_transcript_8548	C3H	TF
F01_transcript_85883	C3H	TF
F01_transcript_8635	C3H	TF
F01_transcript_87417	C3H	TF
F01_transcript_87565	C3H	TF
F01_transcript_8770	C3H	TF
F01_transcript_8779	C3H	TF
F01_transcript_87843	C3H	TF
F01_transcript_8840	C3H	TF
F01_transcript_89459	C3H	TF
F01_transcript_89856	C3H	TF
F01_transcript_91166	C3H	TF
F01_transcript_91198	C3H	TF
F01_transcript_91883	C3H	TF
F01_transcript_92742	C3H	TF
F01_transcript_93292	C3H	TF
F01_transcript_93846	C3H	TF
F01_transcript_94706	C3H	TF
F01_transcript_95258	C3H	TF
F01_transcript_95972	C3H	TF
F01_transcript_9701	C3H	TF
F01_transcript_98287	C3H	TF
F01_transcript_98400	C3H	TF
F01_transcript_98846	C3H	TF
F01_transcript_99060	C3H	TF
F01_transcript_104762	CAMK_AMPK	PK
F01_transcript_10520	CAMK_AMPK	PK
F01_transcript_118251	CAMK_AMPK	PK
F01_transcript_12097	CAMK_AMPK	PK
F01_transcript_125429	CAMK_AMPK	PK
F01_transcript_134585	CAMK_AMPK	PK
F01_transcript_138477	CAMK_AMPK	PK
F01_transcript_41478	CAMK_AMPK	PK
F01_transcript_55973	CAMK_AMPK	PK
F01_transcript_59551	CAMK_AMPK	PK
F01_transcript_64751	CAMK_AMPK	PK
F01_transcript_7113	CAMK_AMPK	PK
F01_transcript_7274	CAMK_AMPK	PK
F01_transcript_83097	CAMK_AMPK	PK
F01_transcript_87546	CAMK_AMPK	PK
F01_transcript_9496	CAMK_AMPK	PK
F01_transcript_12555	CAMK_CAMK1-DCAMKL	PK
F01_transcript_75371	CAMK_CAMK1-DCAMKL	PK
F01_transcript_100271	CAMK_CAMKL-CHK1	PK
F01_transcript_10902	CAMK_CAMKL-CHK1	PK
F01_transcript_109466	CAMK_CAMKL-CHK1	PK
F01_transcript_111766	CAMK_CAMKL-CHK1	PK
F01_transcript_112042	CAMK_CAMKL-CHK1	PK
F01_transcript_114292	CAMK_CAMKL-CHK1	PK
F01_transcript_114708	CAMK_CAMKL-CHK1	PK
F01_transcript_115453	CAMK_CAMKL-CHK1	PK
F01_transcript_117393	CAMK_CAMKL-CHK1	PK
F01_transcript_119337	CAMK_CAMKL-CHK1	PK
F01_transcript_120725	CAMK_CAMKL-CHK1	PK
F01_transcript_12341	CAMK_CAMKL-CHK1	PK
F01_transcript_12638	CAMK_CAMKL-CHK1	PK
F01_transcript_127208	CAMK_CAMKL-CHK1	PK
F01_transcript_128026	CAMK_CAMKL-CHK1	PK
F01_transcript_12862	CAMK_CAMKL-CHK1	PK
F01_transcript_130233	CAMK_CAMKL-CHK1	PK
F01_transcript_13070	CAMK_CAMKL-CHK1	PK
F01_transcript_131532	CAMK_CAMKL-CHK1	PK
F01_transcript_13600	CAMK_CAMKL-CHK1	PK
F01_transcript_13881	CAMK_CAMKL-CHK1	PK
F01_transcript_142081	CAMK_CAMKL-CHK1	PK
F01_transcript_14402	CAMK_CAMKL-CHK1	PK
F01_transcript_145435	CAMK_CAMKL-CHK1	PK
F01_transcript_14832	CAMK_CAMKL-CHK1	PK
F01_transcript_15183	CAMK_CAMKL-CHK1	PK
F01_transcript_15409	CAMK_CAMKL-CHK1	PK
F01_transcript_15912	CAMK_CAMKL-CHK1	PK
F01_transcript_16682	CAMK_CAMKL-CHK1	PK
F01_transcript_17079	CAMK_CAMKL-CHK1	PK
F01_transcript_33541	CAMK_CAMKL-CHK1	PK
F01_transcript_34134	CAMK_CAMKL-CHK1	PK
F01_transcript_35296	CAMK_CAMKL-CHK1	PK
F01_transcript_35718	CAMK_CAMKL-CHK1	PK
F01_transcript_36561	CAMK_CAMKL-CHK1	PK
F01_transcript_39958	CAMK_CAMKL-CHK1	PK
F01_transcript_43666	CAMK_CAMKL-CHK1	PK
F01_transcript_43702	CAMK_CAMKL-CHK1	PK
F01_transcript_46359	CAMK_CAMKL-CHK1	PK
F01_transcript_54313	CAMK_CAMKL-CHK1	PK
F01_transcript_58226	CAMK_CAMKL-CHK1	PK
F01_transcript_6050	CAMK_CAMKL-CHK1	PK
F01_transcript_61468	CAMK_CAMKL-CHK1	PK
F01_transcript_61572	CAMK_CAMKL-CHK1	PK
F01_transcript_6496	CAMK_CAMKL-CHK1	PK
F01_transcript_64981	CAMK_CAMKL-CHK1	PK
F01_transcript_71530	CAMK_CAMKL-CHK1	PK
F01_transcript_76379	CAMK_CAMKL-CHK1	PK
F01_transcript_85507	CAMK_CAMKL-CHK1	PK
F01_transcript_85930	CAMK_CAMKL-CHK1	PK
F01_transcript_85941	CAMK_CAMKL-CHK1	PK
F01_transcript_86792	CAMK_CAMKL-CHK1	PK
F01_transcript_89139	CAMK_CAMKL-CHK1	PK
F01_transcript_9030	CAMK_CAMKL-CHK1	PK
F01_transcript_91463	CAMK_CAMKL-CHK1	PK
F01_transcript_9216	CAMK_CAMKL-CHK1	PK
F01_transcript_92418	CAMK_CAMKL-CHK1	PK
F01_transcript_9769	CAMK_CAMKL-CHK1	PK
F01_transcript_98144	CAMK_CAMKL-CHK1	PK
F01_transcript_99614	CAMK_CAMKL-CHK1	PK
F01_transcript_99797	CAMK_CAMKL-CHK1	PK
F01_transcript_100033	CAMK_CAMKL-LKB	PK
F01_transcript_116884	CAMK_CAMKL-LKB	PK
F01_transcript_11751	CAMK_CAMKL-LKB	PK
F01_transcript_117594	CAMK_CAMKL-LKB	PK
F01_transcript_122503	CAMK_CAMKL-LKB	PK
F01_transcript_143932	CAMK_CAMKL-LKB	PK
F01_transcript_144184	CAMK_CAMKL-LKB	PK
F01_transcript_43575	CAMK_CAMKL-LKB	PK
F01_transcript_52486	CAMK_CAMKL-LKB	PK
F01_transcript_58358	CAMK_CAMKL-LKB	PK
F01_transcript_58930	CAMK_CAMKL-LKB	PK
F01_transcript_78876	CAMK_CAMKL-LKB	PK
F01_transcript_85764	CAMK_CAMKL-LKB	PK
F01_transcript_9233	CAMK_CAMKL-LKB	PK
F01_transcript_9765	CAMK_CAMKL-LKB	PK
F01_transcript_100173	CAMK_CDPK	PK
F01_transcript_100692	CAMK_CDPK	PK
F01_transcript_100736	CAMK_CDPK	PK
F01_transcript_101717	CAMK_CDPK	PK
F01_transcript_102713	CAMK_CDPK	PK
F01_transcript_10298	CAMK_CDPK	PK
F01_transcript_103443	CAMK_CDPK	PK
F01_transcript_105675	CAMK_CDPK	PK
F01_transcript_105897	CAMK_CDPK	PK
F01_transcript_106612	CAMK_CDPK	PK
F01_transcript_106725	CAMK_CDPK	PK
F01_transcript_107031	CAMK_CDPK	PK
F01_transcript_107581	CAMK_CDPK	PK
F01_transcript_10767	CAMK_CDPK	PK
F01_transcript_10994	CAMK_CDPK	PK
F01_transcript_110470	CAMK_CDPK	PK
F01_transcript_110696	CAMK_CDPK	PK
F01_transcript_110985	CAMK_CDPK	PK
F01_transcript_111466	CAMK_CDPK	PK
F01_transcript_11367	CAMK_CDPK	PK
F01_transcript_114737	CAMK_CDPK	PK
F01_transcript_114753	CAMK_CDPK	PK
F01_transcript_115150	CAMK_CDPK	PK
F01_transcript_115663	CAMK_CDPK	PK
F01_transcript_11567	CAMK_CDPK	PK
F01_transcript_116131	CAMK_CDPK	PK
F01_transcript_117770	CAMK_CDPK	PK
F01_transcript_118000	CAMK_CDPK	PK
F01_transcript_118871	CAMK_CDPK	PK
F01_transcript_11940	CAMK_CDPK	PK
F01_transcript_119926	CAMK_CDPK	PK
F01_transcript_120843	CAMK_CDPK	PK
F01_transcript_122863	CAMK_CDPK	PK
F01_transcript_126308	CAMK_CDPK	PK
F01_transcript_127435	CAMK_CDPK	PK
F01_transcript_128089	CAMK_CDPK	PK
F01_transcript_129234	CAMK_CDPK	PK
F01_transcript_12928	CAMK_CDPK	PK
F01_transcript_129753	CAMK_CDPK	PK
F01_transcript_13019	CAMK_CDPK	PK
F01_transcript_130219	CAMK_CDPK	PK
F01_transcript_133126	CAMK_CDPK	PK
F01_transcript_133831	CAMK_CDPK	PK
F01_transcript_133985	CAMK_CDPK	PK
F01_transcript_134298	CAMK_CDPK	PK
F01_transcript_136397	CAMK_CDPK	PK
F01_transcript_136792	CAMK_CDPK	PK
F01_transcript_138973	CAMK_CDPK	PK
F01_transcript_139348	CAMK_CDPK	PK
F01_transcript_141613	CAMK_CDPK	PK
F01_transcript_144075	CAMK_CDPK	PK
F01_transcript_144311	CAMK_CDPK	PK
F01_transcript_145127	CAMK_CDPK	PK
F01_transcript_15154	CAMK_CDPK	PK
F01_transcript_15806	CAMK_CDPK	PK
F01_transcript_2503	CAMK_CDPK	PK
F01_transcript_2805	CAMK_CDPK	PK
F01_transcript_2848	CAMK_CDPK	PK
F01_transcript_2910	CAMK_CDPK	PK
F01_transcript_30942	CAMK_CDPK	PK
F01_transcript_35103	CAMK_CDPK	PK
F01_transcript_3543	CAMK_CDPK	PK
F01_transcript_37897	CAMK_CDPK	PK
F01_transcript_38214	CAMK_CDPK	PK
F01_transcript_39318	CAMK_CDPK	PK
F01_transcript_41107	CAMK_CDPK	PK
F01_transcript_42888	CAMK_CDPK	PK
F01_transcript_43109	CAMK_CDPK	PK
F01_transcript_4333	CAMK_CDPK	PK
F01_transcript_47123	CAMK_CDPK	PK
F01_transcript_47491	CAMK_CDPK	PK
F01_transcript_47924	CAMK_CDPK	PK
F01_transcript_49134	CAMK_CDPK	PK
F01_transcript_49344	CAMK_CDPK	PK
F01_transcript_49598	CAMK_CDPK	PK
F01_transcript_51722	CAMK_CDPK	PK
F01_transcript_52167	CAMK_CDPK	PK
F01_transcript_5245	CAMK_CDPK	PK
F01_transcript_53279	CAMK_CDPK	PK
F01_transcript_54541	CAMK_CDPK	PK
F01_transcript_55179	CAMK_CDPK	PK
F01_transcript_56199	CAMK_CDPK	PK
F01_transcript_56985	CAMK_CDPK	PK
F01_transcript_58117	CAMK_CDPK	PK
F01_transcript_5972	CAMK_CDPK	PK
F01_transcript_6037	CAMK_CDPK	PK
F01_transcript_6054	CAMK_CDPK	PK
F01_transcript_6132	CAMK_CDPK	PK
F01_transcript_62222	CAMK_CDPK	PK
F01_transcript_63628	CAMK_CDPK	PK
F01_transcript_6370	CAMK_CDPK	PK
F01_transcript_65336	CAMK_CDPK	PK
F01_transcript_66058	CAMK_CDPK	PK
F01_transcript_6720	CAMK_CDPK	PK
F01_transcript_67306	CAMK_CDPK	PK
F01_transcript_68056	CAMK_CDPK	PK
F01_transcript_6813	CAMK_CDPK	PK
F01_transcript_70157	CAMK_CDPK	PK
F01_transcript_71397	CAMK_CDPK	PK
F01_transcript_71738	CAMK_CDPK	PK
F01_transcript_72133	CAMK_CDPK	PK
F01_transcript_7240	CAMK_CDPK	PK
F01_transcript_72871	CAMK_CDPK	PK
F01_transcript_73301	CAMK_CDPK	PK
F01_transcript_74288	CAMK_CDPK	PK
F01_transcript_7441	CAMK_CDPK	PK
F01_transcript_74840	CAMK_CDPK	PK
F01_transcript_75090	CAMK_CDPK	PK
F01_transcript_75350	CAMK_CDPK	PK
F01_transcript_7594	CAMK_CDPK	PK
F01_transcript_7606	CAMK_CDPK	PK
F01_transcript_76994	CAMK_CDPK	PK
F01_transcript_77246	CAMK_CDPK	PK
F01_transcript_7778	CAMK_CDPK	PK
F01_transcript_78523	CAMK_CDPK	PK
F01_transcript_79295	CAMK_CDPK	PK
F01_transcript_79609	CAMK_CDPK	PK
F01_transcript_80255	CAMK_CDPK	PK
F01_transcript_8035	CAMK_CDPK	PK
F01_transcript_80578	CAMK_CDPK	PK
F01_transcript_8137	CAMK_CDPK	PK
F01_transcript_82239	CAMK_CDPK	PK
F01_transcript_82245	CAMK_CDPK	PK
F01_transcript_82346	CAMK_CDPK	PK
F01_transcript_8270	CAMK_CDPK	PK
F01_transcript_83560	CAMK_CDPK	PK
F01_transcript_84040	CAMK_CDPK	PK
F01_transcript_85493	CAMK_CDPK	PK
F01_transcript_85629	CAMK_CDPK	PK
F01_transcript_85812	CAMK_CDPK	PK
F01_transcript_86169	CAMK_CDPK	PK
F01_transcript_87219	CAMK_CDPK	PK
F01_transcript_87751	CAMK_CDPK	PK
F01_transcript_88112	CAMK_CDPK	PK
F01_transcript_8899	CAMK_CDPK	PK
F01_transcript_89253	CAMK_CDPK	PK
F01_transcript_8928	CAMK_CDPK	PK
F01_transcript_9029	CAMK_CDPK	PK
F01_transcript_9078	CAMK_CDPK	PK
F01_transcript_91026	CAMK_CDPK	PK
F01_transcript_91182	CAMK_CDPK	PK
F01_transcript_91517	CAMK_CDPK	PK
F01_transcript_92358	CAMK_CDPK	PK
F01_transcript_9467	CAMK_CDPK	PK
F01_transcript_9484	CAMK_CDPK	PK
F01_transcript_96009	CAMK_CDPK	PK
F01_transcript_96676	CAMK_CDPK	PK
F01_transcript_9746	CAMK_CDPK	PK
F01_transcript_97927	CAMK_CDPK	PK
F01_transcript_99124	CAMK_CDPK	PK
F01_transcript_103060	CAMK_OST1L	PK
F01_transcript_103118	CAMK_OST1L	PK
F01_transcript_103283	CAMK_OST1L	PK
F01_transcript_110691	CAMK_OST1L	PK
F01_transcript_11372	CAMK_OST1L	PK
F01_transcript_127029	CAMK_OST1L	PK
F01_transcript_127572	CAMK_OST1L	PK
F01_transcript_13015	CAMK_OST1L	PK
F01_transcript_132768	CAMK_OST1L	PK
F01_transcript_134362	CAMK_OST1L	PK
F01_transcript_134571	CAMK_OST1L	PK
F01_transcript_136418	CAMK_OST1L	PK
F01_transcript_138111	CAMK_OST1L	PK
F01_transcript_139434	CAMK_OST1L	PK
F01_transcript_139854	CAMK_OST1L	PK
F01_transcript_141106	CAMK_OST1L	PK
F01_transcript_14927	CAMK_OST1L	PK
F01_transcript_15294	CAMK_OST1L	PK
F01_transcript_15544	CAMK_OST1L	PK
F01_transcript_17813	CAMK_OST1L	PK
F01_transcript_18324	CAMK_OST1L	PK
F01_transcript_18811	CAMK_OST1L	PK
F01_transcript_19103	CAMK_OST1L	PK
F01_transcript_19827	CAMK_OST1L	PK
F01_transcript_20345	CAMK_OST1L	PK
F01_transcript_2372	CAMK_OST1L	PK
F01_transcript_34606	CAMK_OST1L	PK
F01_transcript_35841	CAMK_OST1L	PK
F01_transcript_39802	CAMK_OST1L	PK
F01_transcript_51740	CAMK_OST1L	PK
F01_transcript_54604	CAMK_OST1L	PK
F01_transcript_55752	CAMK_OST1L	PK
F01_transcript_63623	CAMK_OST1L	PK
F01_transcript_64263	CAMK_OST1L	PK
F01_transcript_65047	CAMK_OST1L	PK
F01_transcript_76462	CAMK_OST1L	PK
F01_transcript_76590	CAMK_OST1L	PK
F01_transcript_78776	CAMK_OST1L	PK
F01_transcript_8484	CAMK_OST1L	PK
F01_transcript_85161	CAMK_OST1L	PK
F01_transcript_90964	CAMK_OST1L	PK
F01_transcript_98583	CAMK_OST1L	PK
F01_transcript_101468	CAMTA	TF
F01_transcript_111560	CAMTA	TF
F01_transcript_126355	CAMTA	TF
F01_transcript_143312	CAMTA	TF
F01_transcript_144208	CAMTA	TF
F01_transcript_1558	CAMTA	TF
F01_transcript_420	CAMTA	TF
F01_transcript_68083	CAMTA	TF
F01_transcript_780	CAMTA	TF
F01_transcript_83650	CAMTA	TF
F01_transcript_929	CAMTA	TF
F01_transcript_957	CAMTA	TF
F01_transcript_10013	CK1_CK1	PK
F01_transcript_10068	CK1_CK1	PK
F01_transcript_102566	CK1_CK1	PK
F01_transcript_103338	CK1_CK1	PK
F01_transcript_106692	CK1_CK1	PK
F01_transcript_106721	CK1_CK1	PK
F01_transcript_106812	CK1_CK1	PK
F01_transcript_110495	CK1_CK1	PK
F01_transcript_11155	CK1_CK1	PK
F01_transcript_11313	CK1_CK1	PK
F01_transcript_11332	CK1_CK1	PK
F01_transcript_11433	CK1_CK1	PK
F01_transcript_118709	CK1_CK1	PK
F01_transcript_120798	CK1_CK1	PK
F01_transcript_120806	CK1_CK1	PK
F01_transcript_122134	CK1_CK1	PK
F01_transcript_125705	CK1_CK1	PK
F01_transcript_129579	CK1_CK1	PK
F01_transcript_135134	CK1_CK1	PK
F01_transcript_135985	CK1_CK1	PK
F01_transcript_138473	CK1_CK1	PK
F01_transcript_139615	CK1_CK1	PK
F01_transcript_141342	CK1_CK1	PK
F01_transcript_142394	CK1_CK1	PK
F01_transcript_34105	CK1_CK1	PK
F01_transcript_37899	CK1_CK1	PK
F01_transcript_4717	CK1_CK1	PK
F01_transcript_48870	CK1_CK1	PK
F01_transcript_5145	CK1_CK1	PK
F01_transcript_5539	CK1_CK1	PK
F01_transcript_55572	CK1_CK1	PK
F01_transcript_5632	CK1_CK1	PK
F01_transcript_56477	CK1_CK1	PK
F01_transcript_5708	CK1_CK1	PK
F01_transcript_57384	CK1_CK1	PK
F01_transcript_60896	CK1_CK1	PK
F01_transcript_61105	CK1_CK1	PK
F01_transcript_6398	CK1_CK1	PK
F01_transcript_66080	CK1_CK1	PK
F01_transcript_68247	CK1_CK1	PK
F01_transcript_70447	CK1_CK1	PK
F01_transcript_71096	CK1_CK1	PK
F01_transcript_75238	CK1_CK1	PK
F01_transcript_76604	CK1_CK1	PK
F01_transcript_77847	CK1_CK1	PK
F01_transcript_82394	CK1_CK1	PK
F01_transcript_83060	CK1_CK1	PK
F01_transcript_83266	CK1_CK1	PK
F01_transcript_8398	CK1_CK1	PK
F01_transcript_84110	CK1_CK1	PK
F01_transcript_85413	CK1_CK1	PK
F01_transcript_87302	CK1_CK1	PK
F01_transcript_87710	CK1_CK1	PK
F01_transcript_9084	CK1_CK1	PK
F01_transcript_91106	CK1_CK1	PK
F01_transcript_92271	CK1_CK1	PK
F01_transcript_92664	CK1_CK1	PK
F01_transcript_9331	CK1_CK1	PK
F01_transcript_93720	CK1_CK1	PK
F01_transcript_9616	CK1_CK1	PK
F01_transcript_99989	CK1_CK1	PK
F01_transcript_102254	CK1_CK1-Pl	PK
F01_transcript_105326	CK1_CK1-Pl	PK
F01_transcript_117253	CK1_CK1-Pl	PK
F01_transcript_117933	CK1_CK1-Pl	PK
F01_transcript_120722	CK1_CK1-Pl	PK
F01_transcript_128671	CK1_CK1-Pl	PK
F01_transcript_139632	CK1_CK1-Pl	PK
F01_transcript_2379	CK1_CK1-Pl	PK
F01_transcript_2434	CK1_CK1-Pl	PK
F01_transcript_2682	CK1_CK1-Pl	PK
F01_transcript_2724	CK1_CK1-Pl	PK
F01_transcript_3156	CK1_CK1-Pl	PK
F01_transcript_3266	CK1_CK1-Pl	PK
F01_transcript_3323	CK1_CK1-Pl	PK
F01_transcript_3523	CK1_CK1-Pl	PK
F01_transcript_3565	CK1_CK1-Pl	PK
F01_transcript_37978	CK1_CK1-Pl	PK
F01_transcript_38225	CK1_CK1-Pl	PK
F01_transcript_3878	CK1_CK1-Pl	PK
F01_transcript_39178	CK1_CK1-Pl	PK
F01_transcript_42688	CK1_CK1-Pl	PK
F01_transcript_46148	CK1_CK1-Pl	PK
F01_transcript_51820	CK1_CK1-Pl	PK
F01_transcript_53788	CK1_CK1-Pl	PK
F01_transcript_63360	CK1_CK1-Pl	PK
F01_transcript_63717	CK1_CK1-Pl	PK
F01_transcript_691	CK1_CK1-Pl	PK
F01_transcript_73307	CK1_CK1-Pl	PK
F01_transcript_73565	CK1_CK1-Pl	PK
F01_transcript_76454	CK1_CK1-Pl	PK
F01_transcript_76816	CK1_CK1-Pl	PK
F01_transcript_79146	CK1_CK1-Pl	PK
F01_transcript_80251	CK1_CK1-Pl	PK
F01_transcript_83304	CK1_CK1-Pl	PK
F01_transcript_84851	CK1_CK1-Pl	PK
F01_transcript_91549	CK1_CK1-Pl	PK
F01_transcript_93183	CK1_CK1-Pl	PK
F01_transcript_94708	CK1_CK1-Pl	PK
F01_transcript_97935	CK1_CK1-Pl	PK
F01_transcript_9806	CK1_CK1-Pl	PK
F01_transcript_14940	CMGC_CDK-CCRK	PK
F01_transcript_38110	CMGC_CDK-CCRK	PK
F01_transcript_63837	CMGC_CDK-CCRK	PK
F01_transcript_75407	CMGC_CDK-CCRK	PK
F01_transcript_86412	CMGC_CDK-CCRK	PK
F01_transcript_128256	CMGC_CDK-CDK7	PK
F01_transcript_13642	CMGC_CDK-CDK7	PK
F01_transcript_45769	CMGC_CDK-CDK7	PK
F01_transcript_70651	CMGC_CDK-CDK7	PK
F01_transcript_94350	CMGC_CDK-CDK7	PK
F01_transcript_97127	CMGC_CDK-CDK7	PK
F01_transcript_10518	CMGC_CDK-CDK8	PK
F01_transcript_11371	CMGC_CDK-CDK8	PK
F01_transcript_11994	CMGC_CDK-CDK8	PK
F01_transcript_12435	CMGC_CDK-CDK8	PK
F01_transcript_128500	CMGC_CDK-CDK8	PK
F01_transcript_63071	CMGC_CDK-CDK8	PK
F01_transcript_65509	CMGC_CDK-CDK8	PK
F01_transcript_75841	CMGC_CDK-CDK8	PK
F01_transcript_10049	CMGC_CDK-CRK7-CDK9	PK
F01_transcript_104947	CMGC_CDK-CRK7-CDK9	PK
F01_transcript_10699	CMGC_CDK-CRK7-CDK9	PK
F01_transcript_108907	CMGC_CDK-CRK7-CDK9	PK
F01_transcript_111742	CMGC_CDK-CRK7-CDK9	PK
F01_transcript_112966	CMGC_CDK-CRK7-CDK9	PK
F01_transcript_115752	CMGC_CDK-CRK7-CDK9	PK
F01_transcript_117323	CMGC_CDK-CRK7-CDK9	PK
F01_transcript_11797	CMGC_CDK-CRK7-CDK9	PK
F01_transcript_118940	CMGC_CDK-CRK7-CDK9	PK
F01_transcript_120019	CMGC_CDK-CRK7-CDK9	PK
F01_transcript_123268	CMGC_CDK-CRK7-CDK9	PK
F01_transcript_123371	CMGC_CDK-CRK7-CDK9	PK
F01_transcript_129546	CMGC_CDK-CRK7-CDK9	PK
F01_transcript_130545	CMGC_CDK-CRK7-CDK9	PK
F01_transcript_136975	CMGC_CDK-CRK7-CDK9	PK
F01_transcript_1396	CMGC_CDK-CRK7-CDK9	PK
F01_transcript_140349	CMGC_CDK-CRK7-CDK9	PK
F01_transcript_142290	CMGC_CDK-CRK7-CDK9	PK
F01_transcript_142900	CMGC_CDK-CRK7-CDK9	PK
F01_transcript_144679	CMGC_CDK-CRK7-CDK9	PK
F01_transcript_2083	CMGC_CDK-CRK7-CDK9	PK
F01_transcript_2104	CMGC_CDK-CRK7-CDK9	PK
F01_transcript_2683	CMGC_CDK-CRK7-CDK9	PK
F01_transcript_34995	CMGC_CDK-CRK7-CDK9	PK
F01_transcript_43647	CMGC_CDK-CRK7-CDK9	PK
F01_transcript_44319	CMGC_CDK-CRK7-CDK9	PK
F01_transcript_4486	CMGC_CDK-CRK7-CDK9	PK
F01_transcript_46365	CMGC_CDK-CRK7-CDK9	PK
F01_transcript_52053	CMGC_CDK-CRK7-CDK9	PK
F01_transcript_5264	CMGC_CDK-CRK7-CDK9	PK
F01_transcript_54442	CMGC_CDK-CRK7-CDK9	PK
F01_transcript_60588	CMGC_CDK-CRK7-CDK9	PK
F01_transcript_68815	CMGC_CDK-CRK7-CDK9	PK
F01_transcript_69419	CMGC_CDK-CRK7-CDK9	PK
F01_transcript_70946	CMGC_CDK-CRK7-CDK9	PK
F01_transcript_71435	CMGC_CDK-CRK7-CDK9	PK
F01_transcript_72126	CMGC_CDK-CRK7-CDK9	PK
F01_transcript_73457	CMGC_CDK-CRK7-CDK9	PK
F01_transcript_77475	CMGC_CDK-CRK7-CDK9	PK
F01_transcript_84728	CMGC_CDK-CRK7-CDK9	PK
F01_transcript_84908	CMGC_CDK-CRK7-CDK9	PK
F01_transcript_85727	CMGC_CDK-CRK7-CDK9	PK
F01_transcript_86830	CMGC_CDK-CRK7-CDK9	PK
F01_transcript_89055	CMGC_CDK-CRK7-CDK9	PK
F01_transcript_90149	CMGC_CDK-CRK7-CDK9	PK
F01_transcript_129313	CMGC_CDK-PITSLRE	PK
F01_transcript_138673	CMGC_CDK-PITSLRE	PK
F01_transcript_139115	CMGC_CDK-PITSLRE	PK
F01_transcript_1765	CMGC_CDK-PITSLRE	PK
F01_transcript_1821	CMGC_CDK-PITSLRE	PK
F01_transcript_1923	CMGC_CDK-PITSLRE	PK
F01_transcript_78445	CMGC_CDK-PITSLRE	PK
F01_transcript_88066	CMGC_CDK-PITSLRE	PK
F01_transcript_104849	CMGC_CDK-Pl	PK
F01_transcript_110025	CMGC_CDK-Pl	PK
F01_transcript_118438	CMGC_CDK-Pl	PK
F01_transcript_122837	CMGC_CDK-Pl	PK
F01_transcript_124813	CMGC_CDK-Pl	PK
F01_transcript_125144	CMGC_CDK-Pl	PK
F01_transcript_134932	CMGC_CDK-Pl	PK
F01_transcript_138633	CMGC_CDK-Pl	PK
F01_transcript_2732	CMGC_CDK-Pl	PK
F01_transcript_28733	CMGC_CDK-Pl	PK
F01_transcript_35482	CMGC_CDK-Pl	PK
F01_transcript_43245	CMGC_CDK-Pl	PK
F01_transcript_44479	CMGC_CDK-Pl	PK
F01_transcript_47033	CMGC_CDK-Pl	PK
F01_transcript_53000	CMGC_CDK-Pl	PK
F01_transcript_71656	CMGC_CDK-Pl	PK
F01_transcript_80455	CMGC_CDK-Pl	PK
F01_transcript_81778	CMGC_CDK-Pl	PK
F01_transcript_86706	CMGC_CDK-Pl	PK
F01_transcript_116117	CMGC_CK2	PK
F01_transcript_120357	CMGC_CK2	PK
F01_transcript_121683	CMGC_CK2	PK
F01_transcript_122399	CMGC_CK2	PK
F01_transcript_133996	CMGC_CK2	PK
F01_transcript_134193	CMGC_CK2	PK
F01_transcript_13484	CMGC_CK2	PK
F01_transcript_17073	CMGC_CK2	PK
F01_transcript_17650	CMGC_CK2	PK
F01_transcript_18506	CMGC_CK2	PK
F01_transcript_18838	CMGC_CK2	PK
F01_transcript_19090	CMGC_CK2	PK
F01_transcript_19916	CMGC_CK2	PK
F01_transcript_20187	CMGC_CK2	PK
F01_transcript_20364	CMGC_CK2	PK
F01_transcript_45356	CMGC_CK2	PK
F01_transcript_47217	CMGC_CK2	PK
F01_transcript_58354	CMGC_CK2	PK
F01_transcript_60426	CMGC_CK2	PK
F01_transcript_72421	CMGC_CK2	PK
F01_transcript_73465	CMGC_CK2	PK
F01_transcript_84822	CMGC_CK2	PK
F01_transcript_84931	CMGC_CK2	PK
F01_transcript_95802	CMGC_CK2	PK
F01_transcript_102813	CMGC_CLK	PK
F01_transcript_103733	CMGC_CLK	PK
F01_transcript_112712	CMGC_CLK	PK
F01_transcript_113484	CMGC_CLK	PK
F01_transcript_114092	CMGC_CLK	PK
F01_transcript_115387	CMGC_CLK	PK
F01_transcript_116555	CMGC_CLK	PK
F01_transcript_122825	CMGC_CLK	PK
F01_transcript_125373	CMGC_CLK	PK
F01_transcript_130663	CMGC_CLK	PK
F01_transcript_132413	CMGC_CLK	PK
F01_transcript_133926	CMGC_CLK	PK
F01_transcript_137513	CMGC_CLK	PK
F01_transcript_137950	CMGC_CLK	PK
F01_transcript_139085	CMGC_CLK	PK
F01_transcript_142835	CMGC_CLK	PK
F01_transcript_143133	CMGC_CLK	PK
F01_transcript_14525	CMGC_CLK	PK
F01_transcript_16451	CMGC_CLK	PK
F01_transcript_17764	CMGC_CLK	PK
F01_transcript_19094	CMGC_CLK	PK
F01_transcript_21243	CMGC_CLK	PK
F01_transcript_2287	CMGC_CLK	PK
F01_transcript_39108	CMGC_CLK	PK
F01_transcript_40107	CMGC_CLK	PK
F01_transcript_41335	CMGC_CLK	PK
F01_transcript_50239	CMGC_CLK	PK
F01_transcript_67334	CMGC_CLK	PK
F01_transcript_67716	CMGC_CLK	PK
F01_transcript_76323	CMGC_CLK	PK
F01_transcript_79817	CMGC_CLK	PK
F01_transcript_83165	CMGC_CLK	PK
[truncated: 4,814 more rows]

## Sheet: Sheet1
Family
AGC_MAST
AGC_MAST
AGC_MAST
AGC_MAST
AGC_MAST	5
AGC_NDR
AGC_NDR
AGC_NDR
AGC_NDR
AGC_NDR
AGC_NDR
AGC_NDR
AGC_NDR
AGC_NDR
AGC_NDR
AGC_NDR
AGC_NDR
AGC_NDR
AGC_NDR
AGC_NDR
AGC_NDR
AGC_NDR
AGC_NDR
AGC_NDR
AGC_NDR
AGC_NDR
AGC_NDR
AGC_NDR
AGC_NDR	24
AGC_PDK1
AGC_PDK1
AGC_PDK1	3
AGC_PKA-PKG
AGC_PKA-PKG
AGC_PKA-PKG
AGC_PKA-PKG
AGC_PKA-PKG
AGC_PKA-PKG
AGC_PKA-PKG	7
AGC_RSK-2
AGC_RSK-2
AGC_RSK-2
AGC_RSK-2
AGC_RSK-2
AGC_RSK-2
AGC_RSK-2
AGC_RSK-2
AGC_RSK-2
AGC_RSK-2
AGC_RSK-2
AGC_RSK-2
AGC_RSK-2
AGC_RSK-2
AGC_RSK-2
AGC_RSK-2
AGC_RSK-2
AGC_RSK-2
AGC_RSK-2
AGC_RSK-2
AGC_RSK-2
AGC_RSK-2
AGC_RSK-2
AGC_RSK-2
AGC_RSK-2
AGC_RSK-2
AGC_RSK-2
AGC_RSK-2
AGC_RSK-2
AGC_RSK-2
AGC_RSK-2
AGC_RSK-2
AGC_RSK-2
AGC_RSK-2
AGC_RSK-2
AGC_RSK-2
AGC_RSK-2
AGC_RSK-2
AGC_RSK-2
AGC_RSK-2
AGC_RSK-2
AGC_RSK-2
AGC_RSK-2
AGC_RSK-2
AGC_RSK-2
AGC_RSK-2
AGC_RSK-2
AGC_RSK-2
AGC_RSK-2
AGC_RSK-2
AGC_RSK-2	51
AGC-Pl
AGC-Pl
AGC-Pl
AGC-Pl
AGC-Pl
AGC-Pl
AGC-Pl
AGC-Pl
AGC-Pl
AGC-Pl
AGC-Pl
AGC-Pl
AGC-Pl
AGC-Pl
AGC-Pl
AGC-Pl
AGC-Pl
AGC-Pl
AGC-Pl
AGC-Pl
AGC-Pl
AGC-Pl
AGC-Pl
AGC-Pl	24
Alfin-like
Alfin-like
Alfin-like
Alfin-like
Alfin-like
Alfin-like
Alfin-like
Alfin-like
Alfin-like
Alfin-like
Alfin-like
Alfin-like
Alfin-like
Alfin-like
Alfin-like
Alfin-like
Alfin-like
Alfin-like	18
AP2/ERF-AP2
AP2/ERF-AP2
AP2/ERF-AP2
AP2/ERF-AP2
AP2/ERF-AP2
AP2/ERF-AP2
AP2/ERF-AP2
AP2/ERF-AP2
AP2/ERF-AP2
AP2/ERF-AP2
AP2/ERF-AP2
AP2/ERF-AP2
AP2/ERF-AP2
AP2/ERF-AP2
AP2/ERF-AP2
AP2/ERF-AP2
AP2/ERF-AP2
AP2/ERF-AP2
AP2/ERF-AP2
AP2/ERF-AP2
AP2/ERF-AP2
AP2/ERF-AP2
AP2/ERF-AP2
AP2/ERF-AP2
AP2/ERF-AP2
AP2/ERF-AP2
AP2/ERF-AP2
AP2/ERF-AP2
AP2/ERF-AP2
AP2/ERF-AP2	30
AP2/ERF-ERF
AP2/ERF-ERF
AP2/ERF-ERF
AP2/ERF-ERF
AP2/ERF-ERF
AP2/ERF-ERF
AP2/ERF-ERF
AP2/ERF-ERF
AP2/ERF-ERF
AP2/ERF-ERF
AP2/ERF-ERF
AP2/ERF-ERF
AP2/ERF-ERF
AP2/ERF-ERF
AP2/ERF-ERF
AP2/ERF-ERF
AP2/ERF-ERF
AP2/ERF-ERF
AP2/ERF-ERF
AP2/ERF-ERF
AP2/ERF-ERF
AP2/ERF-ERF
AP2/ERF-ERF
AP2/ERF-ERF
AP2/ERF-ERF
AP2/ERF-ERF
AP2/ERF-ERF
AP2/ERF-ERF
AP2/ERF-ERF
AP2/ERF-ERF
AP2/ERF-ERF
AP2/ERF-ERF
AP2/ERF-ERF
AP2/ERF-ERF
AP2/ERF-ERF
AP2/ERF-ERF
AP2/ERF-ERF
AP2/ERF-ERF
AP2/ERF-ERF
AP2/ERF-ERF
AP2/ERF-ERF
AP2/ERF-ERF
AP2/ERF-ERF
AP2/ERF-ERF
AP2/ERF-ERF
AP2/ERF-ERF
AP2/ERF-ERF
AP2/ERF-ERF
AP2/ERF-ERF
AP2/ERF-ERF
AP2/ERF-ERF
AP2/ERF-ERF
AP2/ERF-ERF
AP2/ERF-ERF
AP2/ERF-ERF
AP2/ERF-ERF
AP2/ERF-ERF
AP2/ERF-ERF
AP2/ERF-ERF
AP2/ERF-ERF
AP2/ERF-ERF
AP2/ERF-ERF
AP2/ERF-ERF
AP2/ERF-ERF
AP2/ERF-ERF
AP2/ERF-ERF
AP2/ERF-ERF
AP2/ERF-ERF
AP2/ERF-ERF
AP2/ERF-ERF
AP2/ERF-ERF
AP2/ERF-ERF
AP2/ERF-ERF
AP2/ERF-ERF
AP2/ERF-ERF
AP2/ERF-ERF
AP2/ERF-ERF
AP2/ERF-ERF
AP2/ERF-ERF
AP2/ERF-ERF
AP2/ERF-ERF
AP2/ERF-ERF
AP2/ERF-ERF
AP2/ERF-ERF
AP2/ERF-ERF
AP2/ERF-ERF
AP2/ERF-ERF
AP2/ERF-ERF
AP2/ERF-ERF
AP2/ERF-ERF
AP2/ERF-ERF
AP2/ERF-ERF
AP2/ERF-ERF
AP2/ERF-ERF
AP2/ERF-ERF
AP2/ERF-ERF
AP2/ERF-ERF
AP2/ERF-ERF
AP2/ERF-ERF
AP2/ERF-ERF
AP2/ERF-ERF
AP2/ERF-ERF
AP2/ERF-ERF
AP2/ERF-ERF
AP2/ERF-ERF
AP2/ERF-ERF
AP2/ERF-ERF
AP2/ERF-ERF
AP2/ERF-ERF
AP2/ERF-ERF
AP2/ERF-ERF
AP2/ERF-ERF
AP2/ERF-ERF
AP2/ERF-ERF
AP2/ERF-ERF
AP2/ERF-ERF
AP2/ERF-ERF
AP2/ERF-ERF
AP2/ERF-ERF
AP2/ERF-ERF
AP2/ERF-ERF
AP2/ERF-ERF
AP2/ERF-ERF
AP2/ERF-ERF
AP2/ERF-ERF
AP2/ERF-ERF
AP2/ERF-ERF
AP2/ERF-ERF
AP2/ERF-ERF
AP2/ERF-ERF
AP2/ERF-ERF
AP2/ERF-ERF
AP2/ERF-ERF
AP2/ERF-ERF
AP2/ERF-ERF
AP2/ERF-ERF
AP2/ERF-ERF
AP2/ERF-ERF
AP2/ERF-ERF
AP2/ERF-ERF
AP2/ERF-ERF
AP2/ERF-ERF
AP2/ERF-ERF
AP2/ERF-ERF
AP2/ERF-ERF
AP2/ERF-ERF
AP2/ERF-ERF
AP2/ERF-ERF
AP2/ERF-ERF
AP2/ERF-ERF
AP2/ERF-ERF
AP2/ERF-ERF
AP2/ERF-ERF
AP2/ERF-ERF
AP2/ERF-ERF
AP2/ERF-ERF
AP2/ERF-ERF
AP2/ERF-ERF
AP2/ERF-ERF
AP2/ERF-ERF	160
AP2/ERF-RAV
AP2/ERF-RAV
ARID
ARID
ARID
ARID
ARID
ARID
ARID
ARID
ARID
ARID
ARID
ARID
ARID
ARID
ARID
ARID
ARID
ARID
ARID
ARID
ARID
ARID	22
Aur
AUX/IAA
AUX/IAA
AUX/IAA
AUX/IAA
AUX/IAA
AUX/IAA
AUX/IAA
AUX/IAA
AUX/IAA
AUX/IAA
AUX/IAA
AUX/IAA
AUX/IAA
AUX/IAA
AUX/IAA
AUX/IAA
AUX/IAA
AUX/IAA
AUX/IAA
AUX/IAA
AUX/IAA
AUX/IAA
AUX/IAA
AUX/IAA
AUX/IAA
AUX/IAA
AUX/IAA
AUX/IAA
AUX/IAA
AUX/IAA
AUX/IAA
AUX/IAA
AUX/IAA
AUX/IAA
AUX/IAA
AUX/IAA
AUX/IAA
AUX/IAA
AUX/IAA
AUX/IAA
AUX/IAA
AUX/IAA
AUX/IAA
AUX/IAA
AUX/IAA
AUX/IAA
AUX/IAA
AUX/IAA
AUX/IAA
AUX/IAA
AUX/IAA
AUX/IAA
AUX/IAA
AUX/IAA
AUX/IAA
AUX/IAA
AUX/IAA
AUX/IAA
AUX/IAA
AUX/IAA
AUX/IAA
AUX/IAA
AUX/IAA
AUX/IAA
AUX/IAA
AUX/IAA
AUX/IAA
AUX/IAA
AUX/IAA
AUX/IAA
AUX/IAA
AUX/IAA
AUX/IAA
AUX/IAA
AUX/IAA
AUX/IAA
AUX/IAA
AUX/IAA
AUX/IAA
AUX/IAA
AUX/IAA
AUX/IAA
AUX/IAA
AUX/IAA
AUX/IAA
AUX/IAA
AUX/IAA
AUX/IAA
AUX/IAA
AUX/IAA
AUX/IAA
AUX/IAA
AUX/IAA
AUX/IAA
AUX/IAA
AUX/IAA
AUX/IAA
AUX/IAA
AUX/IAA
AUX/IAA
AUX/IAA
AUX/IAA	103
B3
B3
B3
B3
B3
B3
B3
B3
B3
B3
B3
B3
B3
B3
B3
B3
B3
B3
B3
B3
B3
B3
B3
B3
B3
B3
B3
B3
B3
B3
B3
B3
B3
B3
B3
B3
B3
B3
B3
B3
B3
B3
B3
B3
B3
B3
B3
B3
B3
B3
B3
B3
B3
B3
B3
B3
B3
B3	58
B3-ARF
B3-ARF
B3-ARF
B3-ARF
B3-ARF
B3-ARF
B3-ARF
B3-ARF
B3-ARF
B3-ARF
B3-ARF
B3-ARF
B3-ARF
B3-ARF
B3-ARF
B3-ARF
B3-ARF
B3-ARF
B3-ARF
B3-ARF
B3-ARF
B3-ARF
B3-ARF
B3-ARF
B3-ARF
B3-ARF
B3-ARF
B3-ARF
B3-ARF
B3-ARF
B3-ARF
B3-ARF
B3-ARF
B3-ARF
B3-ARF
B3-ARF
B3-ARF
B3-ARF
B3-ARF
B3-ARF
B3-ARF
B3-ARF
B3-ARF
B3-ARF
B3-ARF
B3-ARF
B3-ARF
B3-ARF
B3-ARF
B3-ARF
B3-ARF
B3-ARF
B3-ARF
B3-ARF
B3-ARF
B3-ARF
B3-ARF
B3-ARF
B3-ARF
B3-ARF
B3-ARF
B3-ARF
B3-ARF
B3-ARF
B3-ARF
B3-ARF
B3-ARF
B3-ARF
B3-ARF
B3-ARF
B3-ARF
B3-ARF
B3-ARF	73
BBR-BPC
BBR-BPC
BBR-BPC
BBR-BPC
BBR-BPC
BBR-BPC
BBR-BPC
BBR-BPC
BBR-BPC
BBR-BPC
BBR-BPC
BBR-BPC
BBR-BPC
BBR-BPC
BBR-BPC
BBR-BPC
BBR-BPC
BBR-BPC
BBR-BPC
BBR-BPC
BBR-BPC
BBR-BPC
BBR-BPC
BBR-BPC
BBR-BPC	25
BES1
BES1
BES1
BES1
BES1
BES1
BES1
BES1
BES1
BES1
BES1
BES1
BES1
BES1
BES1
BES1
BES1
BES1
BES1	19
bHLH
bHLH
bHLH
bHLH
bHLH
bHLH
bHLH
bHLH
bHLH
bHLH
bHLH
bHLH
bHLH
bHLH
bHLH
bHLH
bHLH
bHLH
bHLH
bHLH
bHLH
bHLH
bHLH
bHLH
bHLH
bHLH
bHLH
bHLH
bHLH
bHLH
bHLH
bHLH
bHLH
bHLH
bHLH
bHLH
bHLH
bHLH
bHLH
bHLH
bHLH
bHLH
bHLH
bHLH
bHLH
bHLH
bHLH
bHLH
bHLH
bHLH
bHLH
bHLH
bHLH
bHLH
bHLH
bHLH
bHLH
bHLH
bHLH
bHLH
bHLH
bHLH
bHLH
bHLH
bHLH
bHLH
bHLH
bHLH
bHLH
bHLH
bHLH
bHLH
bHLH
bHLH
bHLH
bHLH
bHLH
bHLH
bHLH
bHLH
bHLH
bHLH
bHLH
bHLH
bHLH
bHLH
bHLH
bHLH
bHLH
bHLH
bHLH
bHLH
bHLH
bHLH
bHLH
bHLH
bHLH
bHLH
bHLH
bHLH
bHLH
bHLH
bHLH
bHLH
bHLH
bHLH
bHLH
bHLH
bHLH
bHLH
bHLH
bHLH
bHLH
bHLH
bHLH
bHLH
bHLH
bHLH
bHLH
bHLH
bHLH
bHLH
bHLH
bHLH
bHLH
bHLH
bHLH
bHLH
bHLH
bHLH
bHLH
bHLH
bHLH
bHLH
bHLH
bHLH
bHLH
bHLH
bHLH
bHLH
bHLH
bHLH
bHLH
bHLH
bHLH
bHLH
bHLH
bHLH
bHLH
bHLH
bHLH
bHLH
bHLH
bHLH
bHLH
bHLH
bHLH
bHLH
bHLH
bHLH
bHLH
bHLH
bHLH
bHLH
bHLH
bHLH
bHLH
bHLH
bHLH
bHLH
bHLH
bHLH	172
BSD
BSD
BSD
BUB
BUB	5
bZIP
bZIP
bZIP
bZIP
bZIP
bZIP
bZIP
bZIP
bZIP
bZIP
bZIP
bZIP
bZIP
bZIP
bZIP
bZIP
bZIP
bZIP
bZIP
bZIP
bZIP
bZIP
bZIP
bZIP
bZIP
bZIP
bZIP
bZIP
bZIP
bZIP
bZIP
bZIP
bZIP
bZIP
bZIP
bZIP
bZIP
bZIP
bZIP
bZIP
bZIP
bZIP
bZIP
bZIP
bZIP
bZIP
bZIP
bZIP
bZIP
bZIP
bZIP
bZIP
bZIP
bZIP
bZIP
bZIP
bZIP
bZIP
bZIP
bZIP
bZIP
bZIP
bZIP
bZIP
bZIP
bZIP
bZIP
bZIP
bZIP
bZIP
bZIP
bZIP
bZIP
bZIP
bZIP
bZIP
bZIP
bZIP
bZIP
bZIP
bZIP
bZIP
bZIP
bZIP
bZIP
bZIP
bZIP
bZIP
bZIP
bZIP
bZIP
bZIP
bZIP
bZIP
bZIP
bZIP
bZIP
bZIP
bZIP
bZIP
bZIP
bZIP
bZIP
bZIP
bZIP
bZIP
bZIP
bZIP
bZIP
bZIP
bZIP
bZIP
bZIP
bZIP
bZIP
bZIP
bZIP
bZIP
bZIP
bZIP
bZIP
bZIP
bZIP
bZIP
bZIP
bZIP
bZIP
bZIP
bZIP
bZIP
bZIP
bZIP
bZIP
bZIP
bZIP
bZIP
bZIP
bZIP
bZIP
bZIP
bZIP
bZIP
bZIP
bZIP
bZIP
bZIP
bZIP
bZIP
bZIP
bZIP
bZIP
bZIP
bZIP
bZIP
bZIP
bZIP
bZIP	157
C2C2-CO-like
C2C2-CO-like
C2C2-CO-like
C2C2-CO-like
C2C2-CO-like
C2C2-CO-like
C2C2-CO-like
C2C2-CO-like
C2C2-CO-like
C2C2-CO-like
C2C2-CO-like
C2C2-CO-like
C2C2-CO-like
C2C2-CO-like
C2C2-CO-like
C2C2-CO-like
C2C2-CO-like	17
C2C2-Dof
C2C2-Dof
C2C2-Dof
C2C2-Dof
C2C2-Dof
C2C2-Dof
C2C2-Dof
C2C2-Dof
C2C2-Dof
C2C2-Dof
C2C2-Dof
C2C2-Dof
C2C2-Dof
C2C2-Dof
C2C2-Dof
C2C2-Dof
C2C2-Dof
C2C2-Dof
C2C2-Dof
C2C2-Dof
C2C2-Dof
C2C2-Dof
C2C2-Dof
C2C2-Dof
C2C2-Dof
C2C2-Dof
C2C2-Dof
C2C2-Dof
C2C2-Dof
C2C2-Dof
C2C2-Dof
C2C2-Dof
C2C2-Dof
C2C2-Dof
C2C2-Dof
C2C2-Dof
C2C2-Dof
C2C2-Dof
C2C2-Dof
C2C2-Dof
C2C2-Dof
C2C2-Dof
C2C2-Dof	43
C2C2-GATA
C2C2-GATA
C2C2-GATA
C2C2-GATA
C2C2-GATA
C2C2-GATA
C2C2-GATA
C2C2-GATA
C2C2-GATA
C2C2-GATA
C2C2-GATA
C2C2-GATA
C2C2-GATA
C2C2-GATA
C2C2-GATA
C2C2-GATA
C2C2-GATA
C2C2-GATA
C2C2-GATA
C2C2-GATA
C2C2-GATA
C2C2-GATA
C2C2-GATA
C2C2-GATA
C2C2-GATA
C2C2-GATA
C2C2-GATA
C2C2-GATA
C2C2-GATA
C2C2-GATA
C2C2-GATA
C2C2-GATA
C2C2-GATA
C2C2-GATA
C2C2-GATA
C2C2-GATA
C2C2-GATA
C2C2-GATA
C2C2-GATA
C2C2-GATA
C2C2-GATA
C2C2-GATA
C2C2-GATA
C2C2-GATA
C2C2-GATA
C2C2-GATA
C2C2-GATA
C2C2-GATA
C2C2-GATA
C2C2-GATA
C2C2-GATA
C2C2-GATA
C2C2-GATA
C2C2-GATA
C2C2-GATA
C2C2-GATA
C2C2-GATA
C2C2-GATA
C2C2-GATA
C2C2-GATA
C2C2-GATA
C2C2-GATA
C2C2-GATA
C2C2-GATA
C2C2-GATA
C2C2-GATA
C2C2-GATA
C2C2-GATA
C2C2-GATA
C2C2-GATA	70
C2C2-LSD
C2C2-LSD
C2C2-LSD
C2C2-LSD
C2C2-LSD
C2C2-LSD
C2C2-LSD
C2C2-LSD
C2C2-LSD
C2C2-LSD
C2C2-LSD
C2C2-LSD
C2C2-LSD
C2C2-LSD	17
C2C2-YABBY
C2C2-YABBY	2
C2H2
C2H2
C2H2
C2H2
C2H2
C2H2
C2H2
C2H2
C2H2
C2H2
C2H2
C2H2
C2H2
C2H2
C2H2
C2H2
C2H2
C2H2
C2H2
C2H2
C2H2
C2H2
C2H2
C2H2
C2H2
C2H2
C2H2
C2H2
C2H2
C2H2
C2H2
C2H2
C2H2
C2H2
C2H2
C2H2
C2H2
C2H2
C2H2
C2H2
C2H2
C2H2
C2H2
C2H2
C2H2
C2H2
C2H2
C2H2
C2H2
C2H2
C2H2
C2H2
C2H2
C2H2
C2H2
C2H2
C2H2
C2H2
C2H2
C2H2
C2H2
C2H2
C2H2
C2H2
C2H2
C2H2
C2H2
C2H2
C2H2
C2H2
C2H2
C2H2
C2H2
C2H2
C2H2
C2H2
C2H2
C2H2
C2H2
C2H2
C2H2
C2H2
C2H2
C2H2
C2H2
C2H2
C2H2
C2H2
C2H2
C2H2
C2H2
C2H2
C2H2
C2H2
C2H2
C2H2
C2H2
C2H2
C2H2
C2H2
C2H2
C2H2
C2H2
C2H2
C2H2
C2H2
C2H2
C2H2
C2H2
C2H2
C2H2
C2H2
C2H2
C2H2
C2H2
C2H2
C2H2
C2H2
C2H2
C2H2
C2H2
C2H2
C2H2
C2H2
C2H2
C2H2
C2H2
C2H2
C2H2
C2H2
C2H2
C2H2
C2H2
C2H2
C2H2
C2H2	136
C3H
C3H
C3H
C3H
C3H
C3H
C3H
C3H
C3H
C3H
C3H
C3H
C3H
C3H
C3H
C3H
C3H
C3H
C3H
C3H
C3H
C3H
C3H
C3H
C3H
C3H
C3H
C3H
C3H
C3H
C3H
C3H
C3H
C3H
C3H
C3H
C3H
C3H
C3H
C3H
C3H
C3H
C3H
C3H
C3H
C3H
C3H
C3H
C3H
C3H
C3H
C3H
C3H
C3H
C3H
C3H
C3H
C3H
C3H
C3H
C3H
C3H
C3H
C3H
C3H
C3H
C3H
C3H
C3H
C3H
C3H
C3H
C3H
C3H
C3H
C3H
C3H
C3H
C3H
C3H
C3H
C3H
C3H
C3H
C3H
C3H
C3H
C3H
C3H
C3H
C3H
C3H
C3H
C3H
C3H
C3H
C3H
C3H
C3H
C3H
C3H
C3H
C3H
C3H
C3H
C3H
C3H
C3H
C3H
C3H
C3H
C3H
C3H
C3H
C3H
C3H
C3H
C3H
C3H
C3H
C3H
C3H
C3H
C3H
C3H
C3H
C3H
C3H
C3H
C3H
C3H
C3H
C3H
C3H
C3H
C3H
C3H
C3H
C3H
C3H
C3H
C3H
C3H
C3H
C3H
C3H
C3H
C3H
C3H
C3H
C3H
C3H
C3H
C3H
C3H
C3H
C3H
C3H
C3H
C3H
C3H
C3H
C3H
C3H
C3H
C3H
C3H
C3H
C3H
C3H
C3H
C3H
C3H
C3H
C3H
C3H
C3H
C3H
C3H
C3H
C3H
C3H
C3H
C3H
C3H
C3H
C3H
C3H
C3H
C3H
C3H
C3H
C3H
C3H
C3H
C3H
C3H
C3H
C3H
C3H
C3H
C3H
C3H
C3H
C3H
C3H
C3H
C3H
C3H
C3H
C3H
C3H	212
CAMK_AMPK
CAMK_AMPK
CAMK_AMPK
CAMK_AMPK
CAMK_AMPK
CAMK_AMPK
CAMK_AMPK
CAMK_AMPK
CAMK_AMPK
CAMK_AMPK
CAMK_AMPK
CAMK_AMPK
CAMK_AMPK
CAMK_AMPK
CAMK_AMPK
CAMK_AMPK	16
CAMK_CAMK1-DCAMKL
CAMK_CAMK1-DCAMKL	2
CAMK_CAMKL-CHK1
CAMK_CAMKL-CHK1
CAMK_CAMKL-CHK1
CAMK_CAMKL-CHK1
CAMK_CAMKL-CHK1
CAMK_CAMKL-CHK1
CAMK_CAMKL-CHK1
CAMK_CAMKL-CHK1
CAMK_CAMKL-CHK1
CAMK_CAMKL-CHK1
CAMK_CAMKL-CHK1
CAMK_CAMKL-CHK1
CAMK_CAMKL-CHK1
CAMK_CAMKL-CHK1
CAMK_CAMKL-CHK1
CAMK_CAMKL-CHK1
CAMK_CAMKL-CHK1
CAMK_CAMKL-CHK1
CAMK_CAMKL-CHK1
CAMK_CAMKL-CHK1
CAMK_CAMKL-CHK1
CAMK_CAMKL-CHK1
CAMK_CAMKL-CHK1
CAMK_CAMKL-CHK1
CAMK_CAMKL-CHK1
CAMK_CAMKL-CHK1
CAMK_CAMKL-CHK1
CAMK_CAMKL-CHK1
CAMK_CAMKL-CHK1
CAMK_CAMKL-CHK1
CAMK_CAMKL-CHK1
CAMK_CAMKL-CHK1
CAMK_CAMKL-CHK1
CAMK_CAMKL-CHK1
CAMK_CAMKL-CHK1
CAMK_CAMKL-CHK1
CAMK_CAMKL-CHK1
CAMK_CAMKL-CHK1
CAMK_CAMKL-CHK1
CAMK_CAMKL-CHK1
CAMK_CAMKL-CHK1
CAMK_CAMKL-CHK1
CAMK_CAMKL-CHK1
CAMK_CAMKL-CHK1
CAMK_CAMKL-CHK1
CAMK_CAMKL-CHK1
CAMK_CAMKL-CHK1
CAMK_CAMKL-CHK1
CAMK_CAMKL-CHK1
CAMK_CAMKL-CHK1
CAMK_CAMKL-CHK1
CAMK_CAMKL-CHK1
CAMK_CAMKL-CHK1
CAMK_CAMKL-CHK1
CAMK_CAMKL-CHK1
CAMK_CAMKL-CHK1
CAMK_CAMKL-CHK1
CAMK_CAMKL-CHK1
CAMK_CAMKL-CHK1
CAMK_CAMKL-CHK1
CAMK_CAMKL-CHK1	61
CAMK_CAMKL-LKB
CAMK_CAMKL-LKB
CAMK_CAMKL-LKB
CAMK_CAMKL-LKB
CAMK_CAMKL-LKB
CAMK_CAMKL-LKB
CAMK_CAMKL-LKB
CAMK_CAMKL-LKB
CAMK_CAMKL-LKB
CAMK_CAMKL-LKB
CAMK_CAMKL-LKB
CAMK_CAMKL-LKB
CAMK_CAMKL-LKB
CAMK_CAMKL-LKB
CAMK_CAMKL-LKB	15
CAMK_CDPK
CAMK_CDPK
CAMK_CDPK
CAMK_CDPK
CAMK_CDPK
CAMK_CDPK
CAMK_CDPK
CAMK_CDPK
CAMK_CDPK
CAMK_CDPK
CAMK_CDPK
CAMK_CDPK
CAMK_CDPK
CAMK_CDPK
CAMK_CDPK
CAMK_CDPK
CAMK_CDPK
CAMK_CDPK
CAMK_CDPK
CAMK_CDPK
CAMK_CDPK
CAMK_CDPK
CAMK_CDPK
CAMK_CDPK
CAMK_CDPK
CAMK_CDPK
CAMK_CDPK
CAMK_CDPK
CAMK_CDPK
CAMK_CDPK
CAMK_CDPK
CAMK_CDPK
CAMK_CDPK
CAMK_CDPK
CAMK_CDPK
CAMK_CDPK
CAMK_CDPK
CAMK_CDPK
CAMK_CDPK
CAMK_CDPK
CAMK_CDPK
CAMK_CDPK
CAMK_CDPK
CAMK_CDPK
CAMK_CDPK
CAMK_CDPK
CAMK_CDPK
CAMK_CDPK
CAMK_CDPK
CAMK_CDPK
CAMK_CDPK
CAMK_CDPK
CAMK_CDPK
CAMK_CDPK
CAMK_CDPK
CAMK_CDPK
CAMK_CDPK
CAMK_CDPK
CAMK_CDPK
CAMK_CDPK
CAMK_CDPK
CAMK_CDPK
CAMK_CDPK
CAMK_CDPK
CAMK_CDPK
CAMK_CDPK
CAMK_CDPK
CAMK_CDPK
CAMK_CDPK
CAMK_CDPK
CAMK_CDPK
CAMK_CDPK
CAMK_CDPK
CAMK_CDPK
CAMK_CDPK
CAMK_CDPK
CAMK_CDPK
CAMK_CDPK
CAMK_CDPK
CAMK_CDPK
CAMK_CDPK
CAMK_CDPK
CAMK_CDPK
CAMK_CDPK
CAMK_CDPK
CAMK_CDPK
CAMK_CDPK
CAMK_CDPK
CAMK_CDPK
CAMK_CDPK
CAMK_CDPK
CAMK_CDPK
CAMK_CDPK
CAMK_CDPK
CAMK_CDPK
CAMK_CDPK
CAMK_CDPK
CAMK_CDPK
CAMK_CDPK
CAMK_CDPK
CAMK_CDPK
CAMK_CDPK
CAMK_CDPK
CAMK_CDPK
CAMK_CDPK
CAMK_CDPK
CAMK_CDPK
CAMK_CDPK
CAMK_CDPK
CAMK_CDPK
CAMK_CDPK
CAMK_CDPK
CAMK_CDPK
CAMK_CDPK
CAMK_CDPK
CAMK_CDPK
CAMK_CDPK
CAMK_CDPK
CAMK_CDPK
CAMK_CDPK
CAMK_CDPK
CAMK_CDPK
CAMK_CDPK
CAMK_CDPK
CAMK_CDPK
CAMK_CDPK
CAMK_CDPK
CAMK_CDPK
CAMK_CDPK
CAMK_CDPK
CAMK_CDPK
CAMK_CDPK
CAMK_CDPK
CAMK_CDPK
CAMK_CDPK
CAMK_CDPK
CAMK_CDPK
CAMK_CDPK
CAMK_CDPK
CAMK_CDPK
CAMK_CDPK
CAMK_CDPK
CAMK_CDPK
CAMK_CDPK
CAMK_CDPK
CAMK_CDPK
CAMK_CDPK
CAMK_CDPK
CAMK_CDPK
CAMK_CDPK	150
CAMK_OST1L
CAMK_OST1L
CAMK_OST1L
CAMK_OST1L
CAMK_OST1L
CAMK_OST1L
CAMK_OST1L
CAMK_OST1L
CAMK_OST1L
CAMK_OST1L
CAMK_OST1L
CAMK_OST1L
CAMK_OST1L
CAMK_OST1L
CAMK_OST1L
CAMK_OST1L
CAMK_OST1L
CAMK_OST1L
CAMK_OST1L
CAMK_OST1L
CAMK_OST1L
CAMK_OST1L
CAMK_OST1L
CAMK_OST1L
CAMK_OST1L
CAMK_OST1L
CAMK_OST1L
CAMK_OST1L
CAMK_OST1L
CAMK_OST1L
CAMK_OST1L
CAMK_OST1L
CAMK_OST1L
CAMK_OST1L
CAMK_OST1L
CAMK_OST1L
CAMK_OST1L
CAMK_OST1L
CAMK_OST1L
CAMK_OST1L
CAMK_OST1L
CAMK_OST1L	42
CAMTA
CAMTA
CAMTA
CAMTA
CAMTA
CAMTA
CAMTA
CAMTA
CAMTA
CAMTA
CAMTA
CAMTA	12
CK1_CK1
CK1_CK1
CK1_CK1
CK1_CK1
CK1_CK1
CK1_CK1
CK1_CK1
CK1_CK1
CK1_CK1
CK1_CK1
CK1_CK1
CK1_CK1
CK1_CK1
CK1_CK1
CK1_CK1
CK1_CK1
CK1_CK1
CK1_CK1
CK1_CK1
CK1_CK1
CK1_CK1
CK1_CK1
CK1_CK1
CK1_CK1
CK1_CK1
CK1_CK1
CK1_CK1
CK1_CK1
CK1_CK1
CK1_CK1
CK1_CK1
CK1_CK1
CK1_CK1
CK1_CK1
CK1_CK1
CK1_CK1
CK1_CK1
CK1_CK1
CK1_CK1
CK1_CK1
CK1_CK1
CK1_CK1
CK1_CK1
CK1_CK1
CK1_CK1
CK1_CK1
CK1_CK1
CK1_CK1
CK1_CK1
CK1_CK1
CK1_CK1
CK1_CK1
CK1_CK1
CK1_CK1
CK1_CK1
CK1_CK1
CK1_CK1
CK1_CK1
CK1_CK1
CK1_CK1
CK1_CK1	61
CK1_CK1-Pl
CK1_CK1-Pl
CK1_CK1-Pl
CK1_CK1-Pl
CK1_CK1-Pl
CK1_CK1-Pl
CK1_CK1-Pl
CK1_CK1-Pl
CK1_CK1-Pl
CK1_CK1-Pl
CK1_CK1-Pl
CK1_CK1-Pl
CK1_CK1-Pl
CK1_CK1-Pl
CK1_CK1-Pl
CK1_CK1-Pl
CK1_CK1-Pl
CK1_CK1-Pl
CK1_CK1-Pl
CK1_CK1-Pl
CK1_CK1-Pl
CK1_CK1-Pl
CK1_CK1-Pl
CK1_CK1-Pl
CK1_CK1-Pl
CK1_CK1-Pl
CK1_CK1-Pl
CK1_CK1-Pl
CK1_CK1-Pl
CK1_CK1-Pl
CK1_CK1-Pl
CK1_CK1-Pl
CK1_CK1-Pl
CK1_CK1-Pl
CK1_CK1-Pl
CK1_CK1-Pl
CK1_CK1-Pl
CK1_CK1-Pl
CK1_CK1-Pl
CK1_CK1-Pl	40
CMGC_CDK-CCRK
CMGC_CDK-CCRK
CMGC_CDK-CCRK
CMGC_CDK-CCRK
CMGC_CDK-CCRK
CMGC_CDK-CDK7
CMGC_CDK-CDK7
CMGC_CDK-CDK7
CMGC_CDK-CDK7
CMGC_CDK-CDK7
CMGC_CDK-CDK7
CMGC_CDK-CDK8
CMGC_CDK-CDK8
CMGC_CDK-CDK8
CMGC_CDK-CDK8
CMGC_CDK-CDK8
CMGC_CDK-CDK8
CMGC_CDK-CDK8
CMGC_CDK-CDK8	19
CMGC_CDK-CRK7-CDK9
CMGC_CDK-CRK7-CDK9
CMGC_CDK-CRK7-CDK9
CMGC_CDK-CRK7-CDK9
CMGC_CDK-CRK7-CDK9
CMGC_CDK-CRK7-CDK9
CMGC_CDK-CRK7-CDK9
CMGC_CDK-CRK7-CDK9
CMGC_CDK-CRK7-CDK9
CMGC_CDK-CRK7-CDK9
CMGC_CDK-CRK7-CDK9
CMGC_CDK-CRK7-CDK9
CMGC_CDK-CRK7-CDK9
CMGC_CDK-CRK7-CDK9
CMGC_CDK-CRK7-CDK9
CMGC_CDK-CRK7-CDK9
CMGC_CDK-CRK7-CDK9
CMGC_CDK-CRK7-CDK9
CMGC_CDK-CRK7-CDK9
CMGC_CDK-CRK7-CDK9
CMGC_CDK-CRK7-CDK9
CMGC_CDK-CRK7-CDK9
CMGC_CDK-CRK7-CDK9
CMGC_CDK-CRK7-CDK9
CMGC_CDK-CRK7-CDK9
CMGC_CDK-CRK7-CDK9
CMGC_CDK-CRK7-CDK9
CMGC_CDK-CRK7-CDK9
CMGC_CDK-CRK7-CDK9
CMGC_CDK-CRK7-CDK9
CMGC_CDK-CRK7-CDK9
CMGC_CDK-CRK7-CDK9
CMGC_CDK-CRK7-CDK9
CMGC_CDK-CRK7-CDK9
CMGC_CDK-CRK7-CDK9
CMGC_CDK-CRK7-CDK9
CMGC_CDK-CRK7-CDK9
CMGC_CDK-CRK7-CDK9
CMGC_CDK-CRK7-CDK9
CMGC_CDK-CRK7-CDK9
CMGC_CDK-CRK7-CDK9
CMGC_CDK-CRK7-CDK9
CMGC_CDK-CRK7-CDK9
CMGC_CDK-CRK7-CDK9
CMGC_CDK-CRK7-CDK9
CMGC_CDK-CRK7-CDK9	46
CMGC_CDK-PITSLRE
CMGC_CDK-PITSLRE
CMGC_CDK-PITSLRE
CMGC_CDK-PITSLRE
CMGC_CDK-PITSLRE
CMGC_CDK-PITSLRE
CMGC_CDK-PITSLRE
CMGC_CDK-PITSLRE	8
CMGC_CDK-Pl
CMGC_CDK-Pl
CMGC_CDK-Pl
CMGC_CDK-Pl
CMGC_CDK-Pl
CMGC_CDK-Pl
CMGC_CDK-Pl
CMGC_CDK-Pl
CMGC_CDK-Pl
CMGC_CDK-Pl
CMGC_CDK-Pl
CMGC_CDK-Pl
CMGC_CDK-Pl
CMGC_CDK-Pl
CMGC_CDK-Pl
CMGC_CDK-Pl
CMGC_CDK-Pl
CMGC_CDK-Pl
CMGC_CDK-Pl	19
CMGC_CK2
CMGC_CK2
CMGC_CK2
CMGC_CK2
CMGC_CK2
CMGC_CK2
CMGC_CK2
CMGC_CK2
CMGC_CK2
CMGC_CK2
CMGC_CK2
CMGC_CK2
CMGC_CK2
CMGC_CK2
CMGC_CK2
CMGC_CK2
CMGC_CK2
CMGC_CK2
CMGC_CK2
CMGC_CK2
CMGC_CK2
CMGC_CK2
CMGC_CK2
CMGC_CK2	24
CMGC_CLK
CMGC_CLK
CMGC_CLK
CMGC_CLK
CMGC_CLK
CMGC_CLK
CMGC_CLK
CMGC_CLK
CMGC_CLK
CMGC_CLK
CMGC_CLK
CMGC_CLK
CMGC_CLK
CMGC_CLK
CMGC_CLK
CMGC_CLK
CMGC_CLK
CMGC_CLK
CMGC_CLK
CMGC_CLK
CMGC_CLK
CMGC_CLK
CMGC_CLK
CMGC_CLK
CMGC_CLK
CMGC_CLK
CMGC_CLK
CMGC_CLK
CMGC_CLK
CMGC_CLK
CMGC_CLK
CMGC_CLK
[truncated: 4,814 more rows]

## Sheet: Sheet2
Family	Number
PHD	90
CMGC_GSK	93
MYB	94
Trihelix	95
HSF	96
SET	97
AUX/IAA	103
GRAS	113
RLK-Pelle_RLCK-VIIa-2	118
WRKY	120
C2H2	136
NAC	136			6108
RLK-Pelle_DLSV	145
CAMK_CDPK	150
bZIP	157
AP2/ERF-ERF	160
bHLH	172
C3H	212
MYB-related	240	2527
Others	3581
