# Supplementary material for: A bZIP transcription factor, PqbZIP1, is involved in the plant defense response of American ginseng
Source: PeerJ. 2022 Mar 8;10:e12939. doi: 10.7717/peerj.12939 (PMC8916028; doi:10.7717/peerj.12939)
Supplement: Supplemental Information 5 [file peerj-10-12939-s005.xlsx]

## Sheet: Sheet1
Table S1 Statistics of sequencing data for the SMRT cell by PacBio sequel II sequencing.
Smaples	cDNA size	SMRT Cells	Data Size (G)	CCS Number	Read Bases of CCS	Mean Read Length of CCS	Mean Number of Passes
F01	1-6K	1	25.56	360700	619830996	1718	47
