# Supplementary material for: A bZIP transcription factor, PqbZIP1, is involved in the plant defense response of American ginseng
Source: PeerJ. 2022 Mar 8;10:e12939. doi: 10.7717/peerj.12939 (PMC8916028; doi:10.7717/peerj.12939)
Supplement: Supplemental Information 6 [file peerj-10-12939-s006.xlsx]

## Sheet: Sheet1
		Table S2. Full-length sequence data statistics
Samples	Number of ccs	Number of undesired primer reads	Number of filtered short reads	Number of full-length non-chimeric reads	Full-length non-chimeric percentage (FLNC%)
F01	360700	36775	32	309155	0.8571
