# Supplementary material for: A bZIP transcription factor, PqbZIP1, is involved in the plant defense response of American ginseng
Source: PeerJ. 2022 Mar 8;10:e12939. doi: 10.7717/peerj.12939 (PMC8916028; doi:10.7717/peerj.12939)
Supplement: Supplemental Information 7 [file peerj-10-12939-s007.xlsx]

## Sheet: Sheet1
Table S3. Clustering result statistics
Samples	Number of consensus isoforms	Average consensus isoforms read length	Number of polished high-quality isoforms	Number of polished low-quality isoforms	Percent of polished high-quality isoforms(%)
F01	145855	1719	141222	4167	0.9682
