# Supplementary material for: A bZIP transcription factor, PqbZIP1, is involved in the plant defense response of American ginseng
Source: PeerJ. 2022 Mar 8;10:e12939. doi: 10.7717/peerj.12939 (PMC8916028; doi:10.7717/peerj.12939)
Supplement: Supplemental Information 8 [file peerj-10-12939-s008.xlsx]

## Sheet: Sheet1
Table S4. Sample sequencing data evaluation statistics
#SampleID	ReadSum	BaseSum	GC(%)	N(%)	Q20(%)	CycleQ20(%)	Q30(%)
CH1	23336937	6966889088	43.7	0	98.38	100	95.19
CH2	21901311	6553627776	43.52	0	98.33	100	95.02
CH3	23837148	7132579762	43.68	0	98.38	100	95.1
CK1	24351979	7275486924	43.73	0	98.58	100	95.66
CK2	23965577	7152990846	43.51	0	98.38	100	95.26
CK3	21595526	6453313068	43.69	0	98.46	100	95.49
