# Supplementary material for: A bZIP transcription factor, PqbZIP1, is involved in the plant defense response of American ginseng
Source: PeerJ. 2022 Mar 8;10:e12939. doi: 10.7717/peerj.12939 (PMC8916028; doi:10.7717/peerj.12939)
Supplement: Supplemental Information 9 [file peerj-10-12939-s009.xlsx]

## Sheet: Sheet1
Table S5. Alternative splicing analysis of transcript sequences
QueryName	SubjectName	QhspStart1	QhspEnd1	QhspStart2	QhspEnd2	ShspStart1	ShspEnd1	ShspStart2	ShspEnd2
transcript_47347	gnl|BL_ORD_ID|59622 transcript_110311	1	1467	1467	2875	120	1594	1918	3326
transcript_81468	gnl|BL_ORD_ID|7998 transcript_1857	325	2864	4	326	563	3102	36	358
transcript_61464	gnl|BL_ORD_ID|29188 transcript_63496	1	1494	1492	2039	1	1489	1731	2278
transcript_84656	gnl|BL_ORD_ID|72760 transcript_130963	1999	4502	1	2001	2218	4710	109	2100
transcript_14664	gnl|BL_ORD_ID|53404 transcript_101157	1	1315	1314	1813	2	1317	1492	2003
transcript_56178	gnl|BL_ORD_ID|69939 transcript_126355	1	1956	1954	2943	15	1971	2334	3322
transcript_77877	gnl|BL_ORD_ID|37397 transcript_76030	510	1738	6	513	815	2042	2	509
transcript_14698	gnl|BL_ORD_ID|17791 transcript_2827	179	1783	5	183	1277	2881	1	179
transcript_57215	gnl|BL_ORD_ID|73269 transcript_131810	1	2021	2020	2958	1753	3775	3902	4840
transcript_68553	gnl|BL_ORD_ID|25947 transcript_57987	1	1928	1927	2512	1	1928	2496	3081
transcript_61977	gnl|BL_ORD_ID|62256 transcript_114757	1	1037	1038	1727	2014	3050	3177	3862
transcript_138004	gnl|BL_ORD_ID|14008 transcript_39203	1	1754	1749	2269	496	2250	2436	2956
transcript_103720	gnl|BL_ORD_ID|67560 transcript_123547	157	2051	11	162	278	2188	1	151
transcript_39022	gnl|BL_ORD_ID|65037 transcript_119334	131	1581	1	132	498	1946	261	392
transcript_1995	gnl|BL_ORD_ID|66542 transcript_121794	1	2373	2370	3073	1	2373	2590	3293
transcript_71137	gnl|BL_ORD_ID|64501 transcript_118469	1	1840	1839	2199	3512	5347	5591	5951
transcript_50435	gnl|BL_ORD_ID|68252 transcript_124719	145	1227	2	145	1144	2226	70	213
transcript_69228	gnl|BL_ORD_ID|62161 transcript_114603	1	2076	2076	2492	2618	4692	4861	5277
transcript_39022	gnl|BL_ORD_ID|59647 transcript_110356	131	1581	1	132	2374	3820	2137	2268
transcript_47251	gnl|BL_ORD_ID|33216 transcript_68967	11	1386	1384	2024	18	1401	1775	2445
transcript_52229	gnl|BL_ORD_ID|83185 transcript_12695	1	1174	1170	1681	56	1229	1361	1872
transcript_16261	gnl|BL_ORD_ID|66727 transcript_122100	1	1381	1377	1658	1	1375	1532	1813
transcript_53021	gnl|BL_ORD_ID|37679 transcript_76464	1	1082	1081	1794	827	1910	2672	3386
transcript_100231	gnl|BL_ORD_ID|84497 transcript_77286	1	1261	1262	1809	606	1866	1993	2541
transcript_66191	gnl|BL_ORD_ID|36293 transcript_74145	1	1151	1151	2001	785	1916	2056	2906
transcript_11755	gnl|BL_ORD_ID|13264 transcript_37914	1	1541	1537	1963	1	1541	1759	2186
transcript_95106	gnl|BL_ORD_ID|33327 transcript_69154	2	2786	2786	3331	292	3077	3823	4368
transcript_117516	gnl|BL_ORD_ID|67728 transcript_123816	1	1817	1816	2479	2	1812	2018	2681
transcript_94246	gnl|BL_ORD_ID|79556 transcript_142195	10	1676	1671	2470	1	1667	2507	3306
transcript_59469	gnl|BL_ORD_ID|0 transcript_0	1	1544	1544	2455	4978	6523	6655	7550
transcript_135073	gnl|BL_ORD_ID|57626 transcript_107012	1	2236	2236	2967	5	2240	2920	3646
transcript_41397	gnl|BL_ORD_ID|71706 transcript_129211	1	1266	1265	1580	1	1266	1368	1683
transcript_104609	gnl|BL_ORD_ID|53421 transcript_101192	1	1570	1570	1805	2	1571	1695	1930
transcript_12439	gnl|BL_ORD_ID|69212 transcript_9349	193	1929	4	193	388	2123	59	248
transcript_1122	gnl|BL_ORD_ID|28494 transcript_62324	768	3429	80	767	901	3544	2	695
transcript_3592	gnl|BL_ORD_ID|31993 transcript_66888	1000	2722	11	999	1577	3292	2	989
transcript_38377	gnl|BL_ORD_ID|69468 transcript_125571	1	2429	2430	2681	2	2421	2667	2918
transcript_39092	gnl|BL_ORD_ID|52753 transcript_100047	1	1360	1361	2214	338	1689	1797	2650
transcript_82825	gnl|BL_ORD_ID|41068 transcript_81948	1	1007	1007	1713	19	1025	1134	1840
transcript_144168	gnl|BL_ORD_ID|43312 transcript_5841	2	1000	999	1547	1	1000	1847	2395
transcript_111880	gnl|BL_ORD_ID|73558 transcript_132291	19	2379	2374	3677	42	2386	2712	4008
transcript_15967	gnl|BL_ORD_ID|75009 transcript_134773	295	1704	4	296	398	1803	1	293
transcript_70552	gnl|BL_ORD_ID|31007 transcript_5282	1101	2271	1	1103	1291	2444	4	1106
transcript_71101	gnl|BL_ORD_ID|68145 transcript_124528	2	2278	2276	2498	15	2316	2972	3193
transcript_80252	gnl|BL_ORD_ID|17521 transcript_45124	169	1576	2	173	429	1836	91	276
transcript_122131	gnl|BL_ORD_ID|21909 transcript_51393	1031	2149	1	1033	1164	2285	1	1033
transcript_67260	gnl|BL_ORD_ID|18142 transcript_3505	1	1901	1899	2161	389	2288	2510	2772
transcript_109671	gnl|BL_ORD_ID|12517 transcript_36658	11	4142	4140	5898	3	4127	4239	6003
transcript_131443	gnl|BL_ORD_ID|53659 transcript_101597	1	2146	2145	2847	23	2169	2356	3058
transcript_20289	gnl|BL_ORD_ID|44900 transcript_87188	221	1382	39	222	350	1512	53	236
transcript_119520	gnl|BL_ORD_ID|52647 transcript_99875	1	1290	1288	1876	1	1315	1498	2086
transcript_52895	gnl|BL_ORD_ID|80542 transcript_143823	1	1559	1557	2113	474	2033	2269	2816
transcript_34151	gnl|BL_ORD_ID|32745 transcript_68158	297	2950	4	297	2118	4770	1663	1956
transcript_50435	gnl|BL_ORD_ID|54473 transcript_102933	145	1227	2	145	1042	2123	71	214
transcript_17660	gnl|BL_ORD_ID|15782 transcript_42221	188	1593	5	189	321	1725	2	185
transcript_65887	gnl|BL_ORD_ID|63687 transcript_117126	1	1007	1005	1544	730	1721	2170	2708
transcript_140921	gnl|BL_ORD_ID|70120 transcript_126623	997	2554	1	1001	2259	3793	1454	2456
transcript_133923	gnl|BL_ORD_ID|21677 transcript_50986	210	4143	1	212	435	4400	15	227
transcript_48529	gnl|BL_ORD_ID|66398 transcript_121559	1	2129	2128	2296	179	2285	2396	2564
transcript_47036	gnl|BL_ORD_ID|56173 transcript_7234	1	1195	1195	1859	61	1252	1638	2302
transcript_126972	gnl|BL_ORD_ID|57213 transcript_106290	1	1733	1729	1890	83	1815	1955	2117
transcript_91187	gnl|BL_ORD_ID|83916 transcript_40052	169	1338	3	174	1313	2479	4	177
transcript_77926	gnl|BL_ORD_ID|62971 transcript_115951	1	1482	1482	1850	1347	2829	3053	3421
transcript_53468	gnl|BL_ORD_ID|30351 transcript_65413	174	2282	1	174	322	2427	25	198
transcript_119425	gnl|BL_ORD_ID|43656 transcript_6569	1	1224	1223	2236	6	1228	1338	2351
transcript_39438	gnl|BL_ORD_ID|101 transcript_167	1	2878	2877	3258	982	3858	4173	4554
transcript_2876	gnl|BL_ORD_ID|12122 transcript_35992	201	2792	1	203	1132	3732	1	203
transcript_96057	gnl|BL_ORD_ID|82208 transcript_11098	1	1555	1555	1808	1	1556	1772	2025
transcript_110752	gnl|BL_ORD_ID|66227 transcript_121291	1	1274	1274	2092	1	1275	1716	2535
transcript_121989	gnl|BL_ORD_ID|26391 transcript_58741	1	1560	1558	2136	1	1560	1700	2278
transcript_88091	gnl|BL_ORD_ID|37466 transcript_76143	159	1205	5	160	1113	2175	680	836
transcript_107504	gnl|BL_ORD_ID|22788 transcript_52835	1	1090	1089	1350	1	1089	1273	1534
transcript_20226	gnl|BL_ORD_ID|38613 transcript_77994	300	1332	7	305	1643	2698	1	298
transcript_140156	gnl|BL_ORD_ID|73452 transcript_132106	1006	2751	1	1009	1237	2974	1	1037
transcript_85113	gnl|BL_ORD_ID|56669 transcript_8226	140	1881	1	141	474	2214	174	314
transcript_3437	gnl|BL_ORD_ID|61997 transcript_114336	101	2486	2485	2726	2	2387	2602	2843
transcript_2169	gnl|BL_ORD_ID|8165 transcript_2161	1279	2919	1	1278	1396	3036	1	1278
transcript_103987	gnl|BL_ORD_ID|42430 transcript_84289	1	1149	1145	1493	2	1150	1563	1911
transcript_81986	gnl|BL_ORD_ID|49879 transcript_95328	1	1137	1134	1551	1072	2208	2732	3148
transcript_109520	gnl|BL_ORD_ID|72203 transcript_130047	1	1310	1308	1714	96	1407	1516	1922
transcript_106927	gnl|BL_ORD_ID|45561 transcript_88259	192	2527	12	192	482	2817	2	200
transcript_140168	gnl|BL_ORD_ID|65361 transcript_119855	1	1256	1257	2103	1004	2259	3126	3972
transcript_4696	gnl|BL_ORD_ID|8500 transcript_2727	312	2554	6	315	642	2895	160	465
transcript_46886	gnl|BL_ORD_ID|18177 transcript_3586	1	1488	1487	2296	45	1532	1975	2784
transcript_77367	gnl|BL_ORD_ID|63332 transcript_116517	477	1274	6	476	1130	1928	40	515
transcript_101345	gnl|BL_ORD_ID|35226 transcript_72343	1	1089	1088	1873	2	1098	1765	2546
transcript_68090	gnl|BL_ORD_ID|70122 transcript_126627	3	794	791	989	32	821	2465	2664
transcript_106340	gnl|BL_ORD_ID|3018 transcript_18588	457	1101	5	457	881	1509	3	455
transcript_53760	gnl|BL_ORD_ID|60576 transcript_111934	1	1380	1376	2232	1447	2830	3359	4213
transcript_16982	gnl|BL_ORD_ID|67117 transcript_122747	1	1328	1327	1554	157	1484	1592	1819
transcript_106544	gnl|BL_ORD_ID|40573 transcript_81127	150	1550	1	153	849	2247	52	204
transcript_22526	gnl|BL_ORD_ID|41801 transcript_83229	360	1167	42	362	428	1240	1	322
transcript_42688	gnl|BL_ORD_ID|411 transcript_691	12	2208	2206	2837	3	2199	3035	3666
transcript_44316	gnl|BL_ORD_ID|55159 transcript_104078	1021	3397	1	1024	1264	3641	76	1098
transcript_49690	gnl|BL_ORD_ID|37662 transcript_76439	1	1252	1248	1446	170	1421	1704	1903
transcript_112660	gnl|BL_ORD_ID|18352 transcript_3962	1	1137	1135	1903	1	1127	1911	2674
transcript_93696	gnl|BL_ORD_ID|18933 transcript_46351	1	1383	1380	2164	63	1445	2233	3018
transcript_120006	gnl|BL_ORD_ID|75270 transcript_135199	1	1556	1554	2032	1	1557	1864	2342
transcript_18277	gnl|BL_ORD_ID|12137 transcript_36018	99	1535	2	101	298	1738	1	101
transcript_21733	gnl|BL_ORD_ID|53684 transcript_101633	160	1247	2	165	362	1450	1	160
transcript_65857	gnl|BL_ORD_ID|15121 transcript_41113	1191	2569	1	1192	1482	2836	173	1364
transcript_109067	gnl|BL_ORD_ID|60937 transcript_112568	1	1663	1661	1856	1115	2778	3685	3880
transcript_140050	gnl|BL_ORD_ID|57814 transcript_107327	281	1140	4	281	1577	2455	1	286
transcript_75721	gnl|BL_ORD_ID|49414 transcript_94611	1	2236	2236	2641	1	2236	2731	3136
transcript_59591	gnl|BL_ORD_ID|24012 transcript_54796	1	1387	1386	1930	380	1749	2141	2684
transcript_55591	gnl|BL_ORD_ID|64153 transcript_117916	14	1958	1956	3177	567	2511	3209	4429
transcript_14488	gnl|BL_ORD_ID|49771 transcript_95157	1	1202	1201	1789	149	1348	1669	2257
transcript_62101	gnl|BL_ORD_ID|30653 transcript_4622	162	1466	2	161	1171	2475	760	919
transcript_70665	gnl|BL_ORD_ID|49020 transcript_93940	1	1506	1503	2964	88	1599	2671	4149
transcript_52304	gnl|BL_ORD_ID|25360 transcript_57003	2	4128	4127	4905	2	4121	4234	5012
transcript_84262	gnl|BL_ORD_ID|137 transcript_214	1341	3517	1	1340	1943	4118	497	1837
transcript_136536	gnl|BL_ORD_ID|18390 transcript_4048	1138	2350	1	1140	1450	2673	1	1135
transcript_44378	gnl|BL_ORD_ID|59782 transcript_110603	1	1365	1364	2149	714	2078	2789	3548
transcript_17306	gnl|BL_ORD_ID|52872 transcript_100259	312	1620	60	311	453	1761	2	253
transcript_116530	gnl|BL_ORD_ID|56304 transcript_7511	467	2002	50	466	715	2234	2	417
transcript_128002	gnl|BL_ORD_ID|80824 transcript_144276	6	582	581	1066	752	1344	1526	2010
transcript_88230	gnl|BL_ORD_ID|15128 transcript_41137	1	1146	1141	1701	341	1486	1592	2153
transcript_20194	gnl|BL_ORD_ID|51755 transcript_98411	195	1384	2	196	477	1667	107	301
transcript_5125	gnl|BL_ORD_ID|55020 transcript_103846	248	2500	1	249	1623	3874	36	284
transcript_4696	gnl|BL_ORD_ID|8488 transcript_2705	312	2553	4	316	674	2913	187	498
transcript_139708	gnl|BL_ORD_ID|59897 transcript_110817	1	1072	1070	2034	663	1754	2070	3031
transcript_127318	gnl|BL_ORD_ID|18039 transcript_3316	1185	2584	1	1186	1344	2789	34	1218
transcript_70445	gnl|BL_ORD_ID|72034 transcript_129757	1	1094	1091	1949	1956	3049	3402	4262
transcript_629	gnl|BL_ORD_ID|46130 transcript_89195	256	3755	1	257	486	4003	1	260
transcript_79383	gnl|BL_ORD_ID|82753 transcript_11844	133	1273	2	135	611	1751	137	270
transcript_106278	gnl|BL_ORD_ID|53515 transcript_101350	1	1192	1192	1944	518	1712	1869	2621
transcript_20461	gnl|BL_ORD_ID|70416 transcript_127115	600	1311	7	601	2506	3217	2	596
transcript_14738	gnl|BL_ORD_ID|40016 transcript_80214	1	1424	1425	1724	1	1424	1889	2188
transcript_58543	gnl|BL_ORD_ID|28144 transcript_61742	1	2509	2504	3363	3601	6109	6450	7309
transcript_106827	gnl|BL_ORD_ID|80582 transcript_143882	1	1096	1096	1514	1	1095	2620	3038
transcript_127236	gnl|BL_ORD_ID|50459 transcript_96253	257	2176	37	260	802	2721	2	226
transcript_38607	gnl|BL_ORD_ID|49768 transcript_95153	1	1873	1872	2440	2	1874	1979	2547
transcript_57733	gnl|BL_ORD_ID|21897 transcript_51364	1	1365	1362	1961	214	1586	1695	2307
transcript_63655	gnl|BL_ORD_ID|78985 transcript_141250	2	2253	2253	2707	39	2269	2389	2840
transcript_89449	gnl|BL_ORD_ID|11694 transcript_35306	2226	5708	20	2227	2446	5925	3	2205
transcript_118061	gnl|BL_ORD_ID|70492 transcript_127251	1	1855	1854	2277	1	1857	2261	2684
transcript_49978	gnl|BL_ORD_ID|28156 transcript_61759	174	1679	2	173	1050	2553	1	172
transcript_17057	gnl|BL_ORD_ID|17705 transcript_45416	252	1630	47	253	810	2189	2	208
transcript_105633	gnl|BL_ORD_ID|28230 transcript_61885	213	2596	2	216	532	2915	1	215
transcript_90522	gnl|BL_ORD_ID|23700 transcript_54285	2	2155	2156	2297	26	2178	2283	2424
transcript_9630	gnl|BL_ORD_ID|8452 transcript_2648	327	2055	34	329	1176	2904	2	297
transcript_18096	gnl|BL_ORD_ID|80218 transcript_143297	169	1546	2	170	930	2308	13	181
transcript_12642	gnl|BL_ORD_ID|79317 transcript_141784	383	1902	40	382	1113	2636	2	344
transcript_75248	gnl|BL_ORD_ID|41064 transcript_81942	10	1053	1048	1487	2	1066	1205	1648
transcript_9795	gnl|BL_ORD_ID|48385 transcript_92923	1	1689	1694	2075	3	1688	1922	2303
transcript_117230	gnl|BL_ORD_ID|35965 transcript_73573	2	2266	2263	3648	60	2324	2483	3869
transcript_5778	gnl|BL_ORD_ID|30792 transcript_4896	1	1755	1754	2431	1	1756	1858	2539
transcript_132399	gnl|BL_ORD_ID|85245 transcript_124713	1	1352	1351	2336	405	1756	1920	2905
transcript_120992	gnl|BL_ORD_ID|76622 transcript_137468	13	1862	1862	2472	2	1851	2028	2638
transcript_15734	gnl|BL_ORD_ID|19125 transcript_46660	669	1668	7	670	1820	2819	2	667
transcript_134852	gnl|BL_ORD_ID|34149 transcript_70564	2	2101	2101	2630	13	2112	2265	2794
transcript_70445	gnl|BL_ORD_ID|8176 transcript_2177	1	1094	1093	1949	253	1350	2088	2946
transcript_130842	gnl|BL_ORD_ID|82830 transcript_12004	1	1488	1487	1744	1	1486	1600	1857
transcript_70434	gnl|BL_ORD_ID|71748 transcript_129276	494	1803	58	495	761	2070	2	439
transcript_105598	gnl|BL_ORD_ID|75327 transcript_135292	1	1249	1247	1663	349	1596	2007	2423
transcript_9134	gnl|BL_ORD_ID|17849 transcript_2932	1	1905	1902	2176	62	1966	2569	2841
transcript_100630	gnl|BL_ORD_ID|83876 transcript_37716	1	1745	1745	2171	1472	3216	3316	3742
transcript_83026	gnl|BL_ORD_ID|83475 transcript_13306	1	1565	1565	1753	2	1565	1689	1877
transcript_59013	gnl|BL_ORD_ID|8326 transcript_2432	295	1760	3	299	1408	2873	11	307
transcript_11135	gnl|BL_ORD_ID|56233 transcript_7365	1	1645	1642	1985	5	1678	1883	2228
transcript_17572	gnl|BL_ORD_ID|79289 transcript_141729	299	1535	4	300	857	2093	2	298
transcript_70856	gnl|BL_ORD_ID|16602 transcript_43565	1	1426	1425	1722	1745	3169	3339	3636
transcript_50454	gnl|BL_ORD_ID|52597 transcript_99789	999	2877	2	1000	1241	3119	122	1115
transcript_39301	gnl|BL_ORD_ID|13505 transcript_38310	1	1860	1861	2541	953	2812	3063	3740
transcript_89157	gnl|BL_ORD_ID|51831 transcript_98528	1	1026	1027	1647	867	1891	2545	3162
transcript_129153	gnl|BL_ORD_ID|82113 transcript_10886	1	1356	1355	1806	61	1416	1576	2027
transcript_70882	gnl|BL_ORD_ID|16748 transcript_43832	106	1384	1	107	209	1490	1	107
transcript_63359	gnl|BL_ORD_ID|43794 transcript_6835	1	1598	1597	2229	1	1594	1705	2337
transcript_44428	gnl|BL_ORD_ID|70655 transcript_127512	1	1534	1531	1748	2076	3609	3855	4072
transcript_116777	gnl|BL_ORD_ID|1472 transcript_15405	1	1058	1058	1460	2	1058	1339	1739
transcript_58034	gnl|BL_ORD_ID|15713 transcript_42108	1	2363	2362	3110	1	2372	2974	3704
transcript_100289	gnl|BL_ORD_ID|45003 transcript_87333	155	1967	1	156	386	2195	105	260
transcript_136853	gnl|BL_ORD_ID|27342 transcript_60379	1	1593	1588	2085	9	1631	2116	2613
transcript_96360	gnl|BL_ORD_ID|84278 transcript_64451	1	1184	1179	1542	175	1381	1684	2047
transcript_4401	gnl|BL_ORD_ID|78460 transcript_140451	1	1509	1507	2557	462	1970	3093	4145
transcript_101091	gnl|BL_ORD_ID|19942 transcript_48047	611	2386	73	613	710	2474	1	541
transcript_65732	gnl|BL_ORD_ID|74925 transcript_134644	134	1877	1	133	582	2326	64	196
transcript_120033	gnl|BL_ORD_ID|84279 transcript_64502	1	1067	1068	1386	1	1048	1313	1620
transcript_97765	gnl|BL_ORD_ID|12563 transcript_36736	1	2766	2767	3491	959	3724	4061	4785
transcript_37961	gnl|BL_ORD_ID|30689 transcript_4697	163	2442	1	164	288	2568	1	164
transcript_129337	gnl|BL_ORD_ID|48076 transcript_92426	1	2103	2101	2674	211	2313	2836	3416
transcript_44524	gnl|BL_ORD_ID|7829 transcript_1535	2	2177	2174	2659	127	2263	2366	2850
transcript_122809	gnl|BL_ORD_ID|43866 transcript_6966	1	1705	1701	1999	1	1704	1930	2228
transcript_36603	gnl|BL_ORD_ID|74452 transcript_133833	1	1061	1059	1644	13	1070	1430	2015
transcript_84040	gnl|BL_ORD_ID|40041 transcript_80255	1	1325	1321	2195	8	1332	1442	2316
transcript_36127	gnl|BL_ORD_ID|61289 transcript_113171	124	1993	1	125	1153	3014	43	171
transcript_6900	gnl|BL_ORD_ID|32475 transcript_67729	1	1698	1695	2285	1	1699	1811	2402
transcript_3471	gnl|BL_ORD_ID|73796 transcript_132685	1	2353	2351	2749	1	2364	3119	3517
transcript_19337	gnl|BL_ORD_ID|53573 transcript_101449	117	1472	1	116	271	1629	1	117
transcript_129450	gnl|BL_ORD_ID|24815 transcript_56132	1	1804	1803	1953	27	1828	2177	2334
transcript_109225	gnl|BL_ORD_ID|636 transcript_1100	1	2462	2460	2803	1	2462	3015	3358
transcript_50104	gnl|BL_ORD_ID|76249 transcript_136835	1	2274	2273	2905	1560	3837	3973	4606
transcript_126179	gnl|BL_ORD_ID|78985 transcript_141250	1	1735	1735	2016	542	2269	2389	2669
transcript_101945	gnl|BL_ORD_ID|76837 transcript_137806	1	2261	2262	2487	1	2261	2418	2639
transcript_75364	gnl|BL_ORD_ID|65413 transcript_119939	10	1328	1326	1873	2	1321	1422	1970
transcript_2870	gnl|BL_ORD_ID|19792 transcript_47786	1	2070	2068	2848	1	2071	2734	3515
transcript_64801	gnl|BL_ORD_ID|3189 transcript_18939	1	1086	1086	1299	53	1139	1290	1503
transcript_125816	gnl|BL_ORD_ID|35816 transcript_73343	1	1404	1404	2105	34	1437	1850	2546
transcript_18750	gnl|BL_ORD_ID|2424 transcript_17410	187	1480	3	186	293	1606	2	185
transcript_85505	gnl|BL_ORD_ID|39483 transcript_79375	1	1093	1092	2147	4	1100	1327	2384
transcript_83136	gnl|BL_ORD_ID|757 transcript_1312	1	1202	1201	1910	1015	2216	2462	3171
transcript_82233	gnl|BL_ORD_ID|68856 transcript_8676	1	1416	1413	2021	2	1415	1516	2124
transcript_122916	gnl|BL_ORD_ID|21198 transcript_50167	185	2002	1	185	1200	3018	832	1016
transcript_143998	gnl|BL_ORD_ID|27760 transcript_61116	1	1741	1736	2307	2720	4461	5320	5870
transcript_9067	gnl|BL_ORD_ID|17868 transcript_2972	208	2148	2	212	892	2832	74	283
transcript_51479	gnl|BL_ORD_ID|40863 transcript_81598	1	1523	1521	2208	1	1529	1799	2483
transcript_104766	gnl|BL_ORD_ID|32736 transcript_68144	1	1770	1771	2140	2060	3829	4015	4380
transcript_104146	gnl|BL_ORD_ID|34626 transcript_71352	188	2402	11	187	753	2944	2	179
transcript_63883	gnl|BL_ORD_ID|81574 transcript_145513	320	1086	35	324	1166	1956	2	297
transcript_43097	gnl|BL_ORD_ID|22632 transcript_52584	1	1200	1200	2234	1682	2880	3687	4721
transcript_49284	gnl|BL_ORD_ID|72233 transcript_130094	186	2092	1	188	537	2446	130	317
transcript_13368	gnl|BL_ORD_ID|69142 transcript_9204	1	1613	1612	1887	1	1613	1808	2083
transcript_16734	gnl|BL_ORD_ID|1149 transcript_14728	11	1288	1287	1659	10	1268	1387	1758
transcript_16323	gnl|BL_ORD_ID|58093 transcript_107819	629	1681	7	631	1255	2307	2	626
transcript_113848	gnl|BL_ORD_ID|12055 transcript_35877	1	1192	1191	1568	1405	2597	3327	3704
transcript_24586	gnl|BL_ORD_ID|3714 transcript_20065	406	982	16	408	826	1402	2	394
transcript_126968	gnl|BL_ORD_ID|34859 transcript_71705	1	1743	1741	2130	271	2005	2109	2517
transcript_1291	gnl|BL_ORD_ID|14030 transcript_39246	165	2742	2740	3345	81	2658	2786	3389
transcript_134801	gnl|BL_ORD_ID|18163 transcript_3545	162	1147	2	167	1747	2732	12	180
transcript_39022	gnl|BL_ORD_ID|22255 transcript_51947	131	1581	1	132	1748	3200	1511	1642
transcript_50143	gnl|BL_ORD_ID|78874 transcript_141071	1	1300	1300	1666	1	1275	1959	2325
transcript_114994	gnl|BL_ORD_ID|65118 transcript_119453	1	2654	2655	4362	110	2765	2872	4573
transcript_102514	gnl|BL_ORD_ID|25317 transcript_56946	1	1686	1686	2896	911	2596	2814	4024
transcript_136741	gnl|BL_ORD_ID|7937 transcript_1735	1	1457	1454	2025	24	1503	1743	2314
transcript_96555	gnl|BL_ORD_ID|225 transcript_353	1479	3237	1	1478	2327	4085	510	1987
transcript_23060	gnl|BL_ORD_ID|24770 transcript_56065	255	1133	4	256	4213	5089	3	257
transcript_122238	gnl|BL_ORD_ID|18036 transcript_3308	1011	2291	1	1012	1354	2634	237	1226
transcript_55616	gnl|BL_ORD_ID|84086 transcript_52791	1	2367	2366	2790	1	2351	3125	3549
transcript_8935	gnl|BL_ORD_ID|60268 transcript_111408	142	2154	1	142	2727	4738	1	142
transcript_135343	gnl|BL_ORD_ID|27355 transcript_60401	398	2078	59	401	444	2124	1	343
transcript_107774	gnl|BL_ORD_ID|55077 transcript_103926	356	1816	7	357	466	1937	9	359
transcript_125752	gnl|BL_ORD_ID|12497 transcript_36627	1	2033	2034	2383	195	2225	2471	2824
transcript_119781	gnl|BL_ORD_ID|47517 transcript_91480	16	2628	2627	3188	1	2613	4321	4885
transcript_12296	gnl|BL_ORD_ID|77491 transcript_138848	407	1977	58	409	489	2059	2	353
transcript_65108	gnl|BL_ORD_ID|59895 transcript_110813	195	1700	27	198	488	1994	1	170
transcript_141072	gnl|BL_ORD_ID|43696 transcript_6658	172	1886	17	174	583	2297	2	159
transcript_95164	gnl|BL_ORD_ID|81617 transcript_9842	1	1589	1585	1750	1	1587	1723	1888
transcript_144402	gnl|BL_ORD_ID|75791 transcript_136074	1	2779	2777	4169	25	2803	3172	4564
transcript_134843	gnl|BL_ORD_ID|8080 transcript_2000	1183	2648	1	1184	1613	3079	1	1184
transcript_64732	gnl|BL_ORD_ID|21637 transcript_50917	1	1193	1188	1604	284	1492	1872	2312
transcript_849	gnl|BL_ORD_ID|20577 transcript_49102	1	2533	2533	3585	25	2543	3867	4917
transcript_43867	gnl|BL_ORD_ID|55977 transcript_105411	1	1509	1507	2084	406	1914	2639	3216
transcript_141649	gnl|BL_ORD_ID|16118 transcript_42765	1	1947	1946	2783	628	2574	3181	4018
transcript_62729	gnl|BL_ORD_ID|35489 transcript_72781	11	2080	2079	2396	1	2073	2206	2523
transcript_62536	gnl|BL_ORD_ID|50469 transcript_96276	1	1889	1885	2826	330	2207	2356	3292
transcript_79631	gnl|BL_ORD_ID|15809 transcript_42259	10	1794	1791	2068	7	1797	2741	3018
transcript_145804	gnl|BL_ORD_ID|25765 transcript_57664	1	1081	1081	1658	21	1101	1230	1807
transcript_64630	gnl|BL_ORD_ID|57814 transcript_107327	2	2059	2057	2278	34	2080	2236	2457
transcript_136508	gnl|BL_ORD_ID|41351 transcript_82452	1	1470	1467	2182	1328	2799	3331	4046
transcript_126972	gnl|BL_ORD_ID|30520 transcript_4375	1	1733	1729	1890	85	1817	1957	2118
transcript_51793	gnl|BL_ORD_ID|34361 transcript_70908	1	2912	2909	3147	2	2915	3045	3283
transcript_11135	gnl|BL_ORD_ID|56298 transcript_7503	1	1645	1642	2012	1	1667	1874	2251
transcript_69387	gnl|BL_ORD_ID|57825 transcript_107341	2	2042	2042	2234	39	2104	2587	2779
transcript_12754	gnl|BL_ORD_ID|18279 transcript_3809	209	1907	32	210	963	2661	2	180
transcript_139764	gnl|BL_ORD_ID|85425 transcript_136547	1	1337	1332	1963	27	1361	1601	2232
transcript_109338	gnl|BL_ORD_ID|25389 transcript_57057	158	1258	17	159	825	1934	2	134
transcript_59469	gnl|BL_ORD_ID|16655 transcript_43669	1	1544	1544	2455	5099	6642	6774	7669
transcript_19594	gnl|BL_ORD_ID|32613 transcript_67955	109	1379	1	109	1439	2696	1	107
transcript_94357	gnl|BL_ORD_ID|69393 transcript_9694	1	1311	1306	1869	1	1311	1549	2112
transcript_33905	gnl|BL_ORD_ID|78244 transcript_140102	456	6001	1	457	1081	6628	523	978
transcript_97342	gnl|BL_ORD_ID|68867 transcript_8700	168	1870	1	169	458	2160	2	170
transcript_107547	gnl|BL_ORD_ID|57864 transcript_107409	1	1504	1502	1822	2	1505	1985	2305
transcript_68581	gnl|BL_ORD_ID|40286 transcript_80652	1	2518	2517	2802	325	2865	3440	3725
transcript_46511	gnl|BL_ORD_ID|76633 transcript_137487	1	1975	1976	2409	5	1991	2164	2598
transcript_35881	gnl|BL_ORD_ID|57700 transcript_107135	131	3035	1	134	391	3289	108	241
transcript_126565	gnl|BL_ORD_ID|57240 transcript_106343	184	2851	15	186	375	3042	3	180
transcript_3152	gnl|BL_ORD_ID|69690 transcript_125935	1098	2693	1	1099	1273	2868	1	1099
transcript_79784	gnl|BL_ORD_ID|78710 transcript_140826	228	2630	2	230	329	2733	1	229
transcript_62519	gnl|BL_ORD_ID|81226 transcript_144938	1	1070	1069	1534	8	1080	2583	3048
transcript_17260	gnl|BL_ORD_ID|21747 transcript_51101	1	1164	1164	1558	195	1436	2091	2499
transcript_113974	gnl|BL_ORD_ID|36281 transcript_74124	1	1928	1927	2234	3	1912	2116	2429
transcript_91584	gnl|BL_ORD_ID|19908 transcript_47986	313	1241	7	312	517	1445	1	312
transcript_39571	gnl|BL_ORD_ID|14802 transcript_40577	1	1178	1176	1719	2	1179	1307	1851
transcript_9079	gnl|BL_ORD_ID|35918 transcript_73504	302	2120	9	300	1143	2962	2	296
transcript_108517	gnl|BL_ORD_ID|56057 transcript_7008	1	1190	1189	1772	350	1538	1663	2246
transcript_12880	gnl|BL_ORD_ID|30020 transcript_64855	285	1860	7	286	620	2204	2	282
transcript_12119	gnl|BL_ORD_ID|48127 transcript_92506	1	1065	1065	1957	1	1069	1591	2486
transcript_78043	gnl|BL_ORD_ID|43719 transcript_6705	1	1244	1245	1920	76	1320	1648	2322
transcript_130247	gnl|BL_ORD_ID|61827 transcript_114053	1	1782	1781	2209	378	2158	2284	2713
transcript_101509	gnl|BL_ORD_ID|56717 transcript_8320	418	1893	5	419	721	2195	3	417
transcript_90190	gnl|BL_ORD_ID|30066 transcript_64931	1	2698	2699	3159	106	2782	2953	3410
transcript_57082	gnl|BL_ORD_ID|1911 transcript_16343	422	1504	51	423	535	1617	2	374
transcript_6037	gnl|BL_ORD_ID|62795 transcript_115663	277	2407	36	280	359	2463	15	256
transcript_67979	gnl|BL_ORD_ID|43511 transcript_6257	372	1648	5	371	1136	2412	1	367
transcript_10728	gnl|BL_ORD_ID|83792 transcript_4777	1	1783	1778	2051	1	1785	1944	2217
transcript_6658	gnl|BL_ORD_ID|7936 transcript_1733	157	2297	1	159	841	2981	1	159
transcript_93928	gnl|BL_ORD_ID|18066 transcript_3359	110	1732	1	110	1118	2740	1	110
transcript_6863	gnl|BL_ORD_ID|7970 transcript_1803	1	2021	2020	2333	2	2022	2726	3039
transcript_34078	gnl|BL_ORD_ID|7793 transcript_1476	14	2592	2588	2977	3	2577	2772	3163
transcript_79684	gnl|BL_ORD_ID|30836 transcript_4973	1	1666	1667	1986	269	1916	2181	2489
transcript_83751	gnl|BL_ORD_ID|19258 transcript_46893	169	3051	1	170	899	3782	12	181
transcript_104361	gnl|BL_ORD_ID|55803 transcript_105142	122	1472	1470	2692	2	1352	2296	3518
transcript_6741	gnl|BL_ORD_ID|30847 transcript_4992	1	1714	1711	2349	2	1715	1865	2479
transcript_74731	gnl|BL_ORD_ID|56613 transcript_8114	1	1308	1305	1756	1	1307	1792	2222
transcript_23950	gnl|BL_ORD_ID|44150 transcript_85980	180	1045	6	181	2258	3123	2	177
transcript_9496	gnl|BL_ORD_ID|56194 transcript_7274	232	2089	31	231	461	2314	2	205
transcript_52370	gnl|BL_ORD_ID|80149 transcript_143183	162	1956	1	161	389	2183	1	161
transcript_17076	gnl|BL_ORD_ID|15026 transcript_40942	377	1611	47	381	1416	2650	2	340
transcript_101661	gnl|BL_ORD_ID|23990 transcript_54762	2	2875	2873	3471	23	2862	3796	4390
transcript_2188	gnl|BL_ORD_ID|78478 transcript_140479	2	2329	2329	2960	90	2417	2953	3583
transcript_134315	gnl|BL_ORD_ID|55511 transcript_104678	1292	3111	1	1293	2657	4487	1221	2512
transcript_4326	gnl|BL_ORD_ID|8297 transcript_2378	2	2269	2268	2565	93	2361	2639	2936
transcript_36795	gnl|BL_ORD_ID|34859 transcript_71705	1	2001	1999	2387	29	2005	2109	2520
transcript_5751	gnl|BL_ORD_ID|39410 transcript_79254	1	1547	1546	2455	28	1575	2817	3725
transcript_109067	gnl|BL_ORD_ID|46739 transcript_90240	1	1663	1661	1880	685	2348	3254	3473
transcript_95820	gnl|BL_ORD_ID|32966 transcript_68540	1	1292	1291	2471	408	1699	1815	2997
transcript_75364	gnl|BL_ORD_ID|34747 transcript_71543	1	1328	1326	1873	14	1339	1440	1974
transcript_145025	gnl|BL_ORD_ID|1133 transcript_14698	174	1556	2	178	367	1749	5	181
transcript_110231	gnl|BL_ORD_ID|27032 transcript_59857	130	1203	2	132	441	1520	1	131
transcript_102451	gnl|BL_ORD_ID|71086 transcript_128201	1	2421	2422	3367	42	2448	3301	4247
transcript_1709	gnl|BL_ORD_ID|13859 transcript_38948	198	3171	1	197	417	3392	101	297
transcript_87692	gnl|BL_ORD_ID|56931 transcript_105819	141	2143	1	142	275	2280	10	151
transcript_71752	gnl|BL_ORD_ID|3050 transcript_18671	183	1224	2	184	348	1386	3	184
transcript_133373	gnl|BL_ORD_ID|625 transcript_1083	163	1952	1	160	1565	3351	1	160
transcript_109110	gnl|BL_ORD_ID|13825 transcript_38868	1	2116	2116	2515	711	2829	2934	3320
transcript_139398	gnl|BL_ORD_ID|55187 transcript_104132	264	2171	31	265	396	2303	1	235
transcript_117166	gnl|BL_ORD_ID|50060 transcript_95618	1	1797	1792	2258	299	2096	2215	2666
transcript_83064	gnl|BL_ORD_ID|19379 transcript_47089	11	2415	2411	3294	140	2543	3884	4768
transcript_629	gnl|BL_ORD_ID|14075 transcript_39323	256	3666	2	257	494	3921	11	266
transcript_39297	gnl|BL_ORD_ID|49671 transcript_94999	3	3117	3115	3435	3	3129	3408	3728
transcript_59469	gnl|BL_ORD_ID|37986 transcript_76971	1	1544	1544	2423	3076	4619	4751	5618
transcript_4073	gnl|BL_ORD_ID|40057 transcript_80282	21	2157	2155	2596	1	2135	2258	2699
transcript_2257	gnl|BL_ORD_ID|61448 transcript_113451	311	2961	59	312	499	3149	2	255
transcript_103606	gnl|BL_ORD_ID|76178 transcript_136711	1	1044	1045	1716	1553	2601	3502	4173
transcript_284	gnl|BL_ORD_ID|21677 transcript_50986	225	4161	1	227	435	4400	1	227
transcript_119492	gnl|BL_ORD_ID|83883 transcript_38099	102	1859	1	106	424	2181	138	243
transcript_63213	gnl|BL_ORD_ID|81099 transcript_144731	114	1202	1	116	1667	2755	1	116
transcript_106081	gnl|BL_ORD_ID|72489 transcript_130527	1	2224	2223	3222	1275	3494	3604	4590
transcript_80236	gnl|BL_ORD_ID|12364 transcript_36416	11	2210	2209	2909	2	2209	3087	3788
transcript_114942	gnl|BL_ORD_ID|7921 transcript_1710	2	2231	2230	2629	47	2277	2772	3171
transcript_69778	gnl|BL_ORD_ID|49752 transcript_95127	174	1740	6	175	1339	2887	438	604
transcript_34366	gnl|BL_ORD_ID|35937 transcript_73532	112	2159	1	114	489	2537	6	119
transcript_84983	gnl|BL_ORD_ID|42051 transcript_83649	1	1785	1783	2001	2	1785	2551	2771
transcript_12107	gnl|BL_ORD_ID|18718 transcript_46001	613	1928	82	616	847	2162	2	535
transcript_96615	gnl|BL_ORD_ID|67719 transcript_123801	155	1386	2	157	651	1883	28	176
transcript_59924	gnl|BL_ORD_ID|66444 transcript_121636	1	1819	1814	2146	438	2256	2367	2697
transcript_142799	gnl|BL_ORD_ID|32379 transcript_67565	1	1419	1414	2366	887	2305	2507	3458
transcript_34931	gnl|BL_ORD_ID|85138 transcript_118177	145	1363	3	146	575	1793	2	146
transcript_130074	gnl|BL_ORD_ID|24679 transcript_55897	1	1630	1630	2642	382	2011	2192	3185
transcript_5587	gnl|BL_ORD_ID|81187 transcript_144877	1	1953	1953	2455	1	1956	2080	2583
transcript_43113	gnl|BL_ORD_ID|60950 transcript_112594	153	1166	2	155	1259	2272	46	199
transcript_109014	gnl|BL_ORD_ID|50807 transcript_96856	1	1731	1732	2361	77	1807	2355	2984
transcript_21123	gnl|BL_ORD_ID|36272 transcript_74110	1	1006	1004	1295	166	1170	3249	3540
transcript_55900	gnl|BL_ORD_ID|18069 transcript_3366	1	1108	1106	2041	1	1108	1840	2775
transcript_111034	gnl|BL_ORD_ID|53637 transcript_101557	1	2852	2852	3436	1	2849	3737	4320
transcript_139939	gnl|BL_ORD_ID|16989 transcript_44247	1	1106	1105	2094	1	1106	1246	2211
transcript_22151	gnl|BL_ORD_ID|4284 transcript_21164	162	1208	2	162	276	1322	1	163
transcript_11588	gnl|BL_ORD_ID|73477 transcript_132142	211	1991	39	212	974	2766	2	174
transcript_77548	gnl|BL_ORD_ID|60335 transcript_111527	1	1894	1892	2428	342	2234	2354	2890
transcript_17157	gnl|BL_ORD_ID|60515 transcript_111829	1	1223	1221	1612	1	1224	2925	3330
transcript_10568	gnl|BL_ORD_ID|49066 transcript_94012	166	2042	1	170	517	2393	27	196
transcript_66423	gnl|BL_ORD_ID|65761 transcript_120496	1	2433	2433	2710	1	2454	4176	4451
transcript_63522	gnl|BL_ORD_ID|38878 transcript_78432	1132	2681	11	1135	1311	2861	2	1124
transcript_90032	gnl|BL_ORD_ID|101 transcript_167	1	2628	2628	2983	661	3283	4174	4522
transcript_16797	gnl|BL_ORD_ID|20863 transcript_49581	433	1664	70	433	2557	3789	1	364
transcript_8873	gnl|BL_ORD_ID|47915 transcript_92151	1	2005	2006	2169	1	2005	2211	2376
transcript_119642	gnl|BL_ORD_ID|44157 transcript_85988	1	1743	1744	2563	838	2589	2736	3551
transcript_104696	gnl|BL_ORD_ID|73442 transcript_132079	2	2917	2918	3145	1	2924	3031	3258
transcript_17934	gnl|BL_ORD_ID|69709 transcript_125964	497	1571	70	499	3110	4180	2	430
transcript_89451	gnl|BL_ORD_ID|55997 transcript_105451	1	1483	1481	1701	1	1496	1724	1945
transcript_129647	gnl|BL_ORD_ID|59053 transcript_109381	109	1212	1210	2191	1	1111	1215	2196
transcript_9650	gnl|BL_ORD_ID|83792 transcript_4777	1	1910	1908	2108	1	1912	2025	2225
transcript_17781	gnl|BL_ORD_ID|83673 transcript_13756	127	1564	1	129	418	1855	1	129
transcript_112153	gnl|BL_ORD_ID|48926 transcript_93791	1	1453	1448	2787	1232	2684	3660	5003
transcript_94202	gnl|BL_ORD_ID|35533 transcript_72861	186	1518	7	186	1183	2515	2	181
transcript_76194	gnl|BL_ORD_ID|66107 transcript_121081	2	2217	2217	2466	266	2499	3450	3708
transcript_142126	gnl|BL_ORD_ID|18071 transcript_3368	473	1594	9	474	1634	2755	2	467
transcript_140486	gnl|BL_ORD_ID|58663 transcript_108732	1	2118	2117	2888	1	2123	2242	3013
transcript_3444	gnl|BL_ORD_ID|52999 transcript_100446	1	2141	2141	2758	139	2279	2985	3604
transcript_63119	gnl|BL_ORD_ID|84331 transcript_68347	285	1202	3	288	575	1492	2	287
transcript_87067	gnl|BL_ORD_ID|63121 transcript_116190	1	1159	1160	2228	1519	2690	2944	4012
transcript_21067	gnl|BL_ORD_ID|20643 transcript_49211	402	1121	5	401	816	1535	2	398
transcript_91187	gnl|BL_ORD_ID|71933 transcript_129586	169	1342	2	174	1176	2349	6	179
transcript_56346	gnl|BL_ORD_ID|35976 transcript_73591	294	2017	83	293	438	2161	4	215
transcript_84559	gnl|BL_ORD_ID|35279 transcript_72424	1407	3150	14	1406	1494	3225	19	1374
transcript_79383	gnl|BL_ORD_ID|1061 transcript_14533	135	1273	2	135	431	1569	57	190
transcript_40043	gnl|BL_ORD_ID|8408 transcript_2562	583	1167	9	583	906	1489	1	572
transcript_115767	gnl|BL_ORD_ID|27109 transcript_59987	2	2506	2505	2719	7	2511	4003	4217
transcript_136487	gnl|BL_ORD_ID|79137 transcript_141494	1	1599	1598	2006	1371	2969	3097	3527
transcript_36814	gnl|BL_ORD_ID|43886 transcript_85539	1	1249	1247	1553	456	1704	1953	2259
transcript_110992	gnl|BL_ORD_ID|80026 transcript_142977	1	1489	1484	1641	1898	3386	3917	4074
transcript_90483	gnl|BL_ORD_ID|559 transcript_957	254	2884	2	259	883	3509	135	377
transcript_83165	gnl|BL_ORD_ID|72576 transcript_130663	185	1451	2	184	1310	2575	6	188
transcript_118997	gnl|BL_ORD_ID|25265 transcript_56869	1	1343	1341	2129	38	1389	1683	2468
transcript_36356	gnl|BL_ORD_ID|68782 transcript_8532	217	2081	37	219	306	2150	18	203
transcript_1063	gnl|BL_ORD_ID|48873 transcript_93713	327	3407	1	326	467	3530	1	326
transcript_18192	gnl|BL_ORD_ID|60296 transcript_111468	136	1554	1	139	713	2130	37	175
transcript_36289	gnl|BL_ORD_ID|69864 transcript_126235	3	3932	3931	4316	12	3945	4056	4441
transcript_72748	gnl|BL_ORD_ID|74278 transcript_133544	207	3323	15	208	357	3470	43	224
transcript_4402	gnl|BL_ORD_ID|73923 transcript_132875	1	1759	1757	2604	1	1761	1885	2733
transcript_9650	gnl|BL_ORD_ID|56213 transcript_7321	1	1910	1908	2109	1	1910	2023	2217
transcript_82582	gnl|BL_ORD_ID|24344 transcript_55363	1	1624	1622	1873	634	2262	2759	3010
transcript_126123	gnl|BL_ORD_ID|66470 transcript_121681	1	1284	1283	1611	467	1749	1896	2222
transcript_82275	gnl|BL_ORD_ID|23207 transcript_53511	486	3044	5	487	802	3373	114	592
transcript_131011	gnl|BL_ORD_ID|85209 transcript_122670	1	3001	2996	3346	1169	4158	4579	4928
transcript_128348	gnl|BL_ORD_ID|48564 transcript_93232	1	1361	1360	2087	2	1367	1993	2721
transcript_84709	gnl|BL_ORD_ID|41238 transcript_82255	1	1595	1595	2129	117	1713	1832	2368
transcript_49264	gnl|BL_ORD_ID|69256 transcript_9440	1	1087	1087	1196	386	1475	1991	2100
transcript_122809	gnl|BL_ORD_ID|69196 transcript_9314	1	1704	1701	1966	1	1704	1867	2123
transcript_47424	gnl|BL_ORD_ID|21258 transcript_50267	166	1631	28	167	266	1729	1	140
transcript_54863	gnl|BL_ORD_ID|32980 transcript_68566	183	1655	2	182	698	2170	70	250
transcript_103518	gnl|BL_ORD_ID|48050 transcript_92381	1	2642	2637	3054	3069	5712	6208	6623
transcript_119248	gnl|BL_ORD_ID|31547 transcript_66130	1	2365	2362	3821	4037	6400	7597	9056
transcript_87067	gnl|BL_ORD_ID|66918 transcript_122398	1	1852	1849	2289	1520	3374	4471	4912
transcript_36741	gnl|BL_ORD_ID|47013 transcript_90688	1	1362	1361	2068	38	1399	1913	2624
transcript_63923	gnl|BL_ORD_ID|12907 transcript_37297	11	1118	1116	1395	1	1110	1359	1639
transcript_39022	gnl|BL_ORD_ID|37512 transcript_76212	131	1581	1	132	2044	3492	1807	1938
transcript_64998	gnl|BL_ORD_ID|251 transcript_395	162	2719	1	164	1356	3924	716	872
transcript_9507	gnl|BL_ORD_ID|30806 transcript_4927	420	2116	5	421	800	2490	8	426
transcript_106509	gnl|BL_ORD_ID|81571 transcript_145508	1037	2641	1	1036	3343	4934	2174	3211
transcript_18214	gnl|BL_ORD_ID|39431 transcript_79285	182	1545	4	184	531	1903	4	190
transcript_37490	gnl|BL_ORD_ID|57139 transcript_106171	273	1657	8	278	403	1790	3	274
transcript_141072	gnl|BL_ORD_ID|43658 transcript_6575	172	1888	1	174	626	2329	12	200
transcript_130527	gnl|BL_ORD_ID|17503 transcript_45087	2	3879	3876	4597	17	3873	4050	4771
transcript_11135	gnl|BL_ORD_ID|56130 transcript_7152	1	1645	1642	2012	2	1646	1849	2217
transcript_122449	gnl|BL_ORD_ID|14007 transcript_39201	1	2095	2091	2771	1	2094	2730	3409
transcript_124174	gnl|BL_ORD_ID|76488 transcript_137243	1	1504	1503	1934	2	1505	1916	2347
transcript_92851	gnl|BL_ORD_ID|17061 transcript_44353	133	1007	20	134	2751	3643	59	173
transcript_57910	gnl|BL_ORD_ID|16317 transcript_43091	1	1320	1318	2190	1142	2461	2562	3434
transcript_2519	gnl|BL_ORD_ID|68188 transcript_124609	380	2931	47	384	525	3076	1	338
transcript_34520	gnl|BL_ORD_ID|39444 transcript_79306	2	2516	2517	2708	110	2627	2751	2942
transcript_2704	gnl|BL_ORD_ID|8295 transcript_2376	1	2526	2525	2870	1	2525	2662	3004
transcript_8346	gnl|BL_ORD_ID|12949 transcript_37369	470	2213	6	473	1899	3643	2	469
transcript_105684	gnl|BL_ORD_ID|76626 transcript_137472	388	987	1	388	1622	2221	487	874
transcript_42010	gnl|BL_ORD_ID|19820 transcript_47824	1356	3354	1	1360	1800	3798	259	1616
transcript_85934	gnl|BL_ORD_ID|64755 transcript_118873	1	1018	1019	1949	253	1270	1932	2862
transcript_75578	gnl|BL_ORD_ID|7949 transcript_1767	138	1213	2	139	2067	3142	82	219
transcript_123432	gnl|BL_ORD_ID|57141 transcript_106174	120	1856	1	120	1981	3717	2	121
transcript_129144	gnl|BL_ORD_ID|69076 transcript_9073	1	1282	1283	1658	387	1667	1779	2154
transcript_94256	gnl|BL_ORD_ID|28144 transcript_61742	1	2049	2050	3071	849	2895	3839	4861
transcript_92931	gnl|BL_ORD_ID|66926 transcript_122412	2	2251	2251	2427	41	2288	2737	2911
transcript_92114	gnl|BL_ORD_ID|50622 transcript_96539	1	2339	2337	4039	1	2347	2586	4289
transcript_42520	gnl|BL_ORD_ID|75777 transcript_136051	371	2121	81	373	527	2277	1	293
transcript_116926	gnl|BL_ORD_ID|43688 transcript_6640	1	1886	1887	2193	40	1925	2057	2363
transcript_75090	gnl|BL_ORD_ID|34878 transcript_71738	1	1059	1058	1357	1	1080	1577	1876
transcript_17696	gnl|BL_ORD_ID|16149 transcript_42817	497	1671	6	498	665	1843	13	503
transcript_7236	gnl|BL_ORD_ID|77196 transcript_138372	249	2313	32	248	456	2521	9	228
transcript_133019	gnl|BL_ORD_ID|28123 transcript_61713	549	1243	9	550	1385	2084	1	544
transcript_96176	gnl|BL_ORD_ID|235 transcript_369	1	1688	1686	2064	1791	3478	3622	4000
transcript_119221	gnl|BL_ORD_ID|38149 transcript_77234	205	2577	2	203	549	2922	130	336
transcript_15649	gnl|BL_ORD_ID|68768 transcript_8505	597	1753	76	598	1066	2222	1	523
transcript_52153	gnl|BL_ORD_ID|8078 transcript_1997	1	1883	1882	2998	2	1868	1990	3107
transcript_134384	gnl|BL_ORD_ID|62405 transcript_115010	21	2427	2423	2704	1	2408	2508	2790
transcript_140637	gnl|BL_ORD_ID|45906 transcript_88823	1	2023	2022	2129	879	2899	3034	3142
transcript_43965	gnl|BL_ORD_ID|76606 transcript_137444	12	1327	1327	1485	4	1319	2275	2433
transcript_35539	gnl|BL_ORD_ID|8117 transcript_2070	382	2664	56	383	728	3010	2	329
transcript_8940	gnl|BL_ORD_ID|12076 transcript_35915	1	1254	1255	2170	1	1254	1369	2284
transcript_44459	gnl|BL_ORD_ID|36541 transcript_74570	13	1435	1436	2005	7	1429	1558	2129
transcript_114339	gnl|BL_ORD_ID|20577 transcript_49102	1	1325	1321	1672	3001	4325	4566	4917
transcript_135156	gnl|BL_ORD_ID|54771 transcript_103433	2	2320	2319	2801	19	2340	2609	3091
transcript_54688	gnl|BL_ORD_ID|13867 transcript_38961	191	1398	2	191	408	1615	29	218
transcript_143663	gnl|BL_ORD_ID|40672 transcript_81291	266	2787	22	267	1298	3817	3	248
transcript_112674	gnl|BL_ORD_ID|24786 transcript_56090	1	1373	1368	1838	1	1373	1929	2399
transcript_95667	gnl|BL_ORD_ID|61228 transcript_113056	254	1340	4	254	578	1674	172	422
transcript_119143	gnl|BL_ORD_ID|47678 transcript_91744	20	2379	2377	2530	2	2357	2564	2717
transcript_131513	gnl|BL_ORD_ID|65023 transcript_119314	294	2854	82	298	742	3301	57	272
transcript_95457	gnl|BL_ORD_ID|1484 transcript_15429	1	1163	1162	1581	2	1168	1328	1746
transcript_59580	gnl|BL_ORD_ID|68941 transcript_8850	1	1310	1309	1741	6	1315	1716	2148
transcript_89451	gnl|BL_ORD_ID|64250 transcript_118073	1	1483	1481	1774	1	1496	1723	2017
transcript_90110	gnl|BL_ORD_ID|40280 transcript_80644	1	1469	1468	2061	1	1469	2009	2602
transcript_135485	gnl|BL_ORD_ID|37949 transcript_76904	514	5165	87	518	2040	6701	1	431
transcript_93863	gnl|BL_ORD_ID|67117 transcript_122747	1	867	866	984	618	1484	1592	1710
transcript_21243	gnl|BL_ORD_ID|3268 transcript_19094	189	1294	2	188	382	1487	5	191
transcript_3359	gnl|BL_ORD_ID|8165 transcript_2161	1279	2748	1	1277	1396	2864	1	1277
transcript_3437	gnl|BL_ORD_ID|8129 transcript_2092	997	2758	1	1000	1223	2984	10	1009
transcript_127528	gnl|BL_ORD_ID|3289 transcript_19136	183	1117	2	183	540	1474	143	324
transcript_93690	gnl|BL_ORD_ID|55856 transcript_105218	1	1729	1728	2000	3	1746	1855	2128
transcript_93970	gnl|BL_ORD_ID|55306 transcript_104349	1568	4138	1	1568	2592	5150	847	2414
transcript_135095	gnl|BL_ORD_ID|1288 transcript_15017	354	1359	5	359	576	1593	4	356
transcript_119949	gnl|BL_ORD_ID|46899 transcript_90502	1	1504	1502	2082	5	1513	2303	2882
transcript_97869	gnl|BL_ORD_ID|24092 transcript_54929	284	3643	2	284	451	3809	18	300
transcript_127696	gnl|BL_ORD_ID|13653 transcript_38579	1554	3355	1	1553	2328	4126	2	1529
transcript_93348	gnl|BL_ORD_ID|43979 transcript_85699	1	1817	1815	1943	2343	4159	4279	4407
transcript_59469	gnl|BL_ORD_ID|49874 transcript_95321	1	1544	1544	2424	801	2344	4178	5058
transcript_112987	gnl|BL_ORD_ID|676 transcript_1166	1	2611	2609	3171	117	2726	2826	3387
transcript_107774	gnl|BL_ORD_ID|60533 transcript_111856	358	1757	7	357	608	2006	5	355
transcript_139102	gnl|BL_ORD_ID|42408 transcript_84253	1	1752	1749	2618	1	1731	1847	2716
transcript_43941	gnl|BL_ORD_ID|43859 transcript_6959	1	1116	1113	1954	189	1304	1412	2254
transcript_75381	gnl|BL_ORD_ID|22570 transcript_52469	1	1184	1183	1913	2	1159	1553	2301
transcript_6731	gnl|BL_ORD_ID|77258 transcript_138469	300	2343	40	302	878	2920	3	263
transcript_87791	gnl|BL_ORD_ID|72526 transcript_130581	1	1255	1256	1718	2	1253	1490	1953
transcript_4225	gnl|BL_ORD_ID|74865 transcript_134533	1	2196	2194	2597	1	2196	2442	2844
transcript_38967	gnl|BL_ORD_ID|48589 transcript_93272	1	1016	1014	1471	111	1125	1293	1749
transcript_83026	gnl|BL_ORD_ID|53421 transcript_101192	1	1565	1565	1755	3	1571	1695	1886
transcript_144533	gnl|BL_ORD_ID|66681 transcript_122020	2	2635	2635	2994	1	2634	3711	4071
transcript_100336	gnl|BL_ORD_ID|79154 transcript_141525	2	2244	2242	3558	1	2243	2347	3634
transcript_3194	gnl|BL_ORD_ID|74574 transcript_134056	180	2708	1	181	372	2940	1	181
transcript_77862	gnl|BL_ORD_ID|84884 transcript_101680	101	1576	1576	2204	1	1474	1575	2203
transcript_76472	gnl|BL_ORD_ID|22199 transcript_51856	1	1602	1601	1890	1477	3074	3179	3468
transcript_81175	gnl|BL_ORD_ID|26247 transcript_58466	2267	5022	2	2271	2595	5350	1	2268
transcript_119248	gnl|BL_ORD_ID|63260 transcript_116402	1	2365	2362	3820	2189	4555	4682	6141
transcript_106509	gnl|BL_ORD_ID|60909 transcript_112520	1037	2659	1	1036	1529	3151	364	1398
transcript_141182	gnl|BL_ORD_ID|41473 transcript_82643	178	1973	1	178	4440	6235	3943	4120
transcript_119320	gnl|BL_ORD_ID|49874 transcript_95321	1	2611	2606	3510	238	2849	3513	4436
transcript_109003	gnl|BL_ORD_ID|26401 transcript_58762	1	1220	1219	1444	874	2091	2228	2452
transcript_58701	gnl|BL_ORD_ID|40882 transcript_81634	185	1405	2	189	700	1921	327	514
transcript_69520	gnl|BL_ORD_ID|69468 transcript_125571	21	2422	2423	2709	28	2421	2673	2943
transcript_105365	gnl|BL_ORD_ID|15001 transcript_40898	259	2865	2	261	490	3101	53	311
transcript_56798	gnl|BL_ORD_ID|51515 transcript_98034	1	1660	1660	2014	29	1698	1853	2207
transcript_55961	gnl|BL_ORD_ID|62971 transcript_115951	1	2094	2093	3116	1	2095	2284	3307
transcript_111240	gnl|BL_ORD_ID|42868 transcript_85014	538	2249	6	543	654	2366	2	539
transcript_60572	gnl|BL_ORD_ID|79601 transcript_142281	1179	2609	1	1180	1315	2745	2	1184
transcript_126243	gnl|BL_ORD_ID|17935 transcript_3121	455	2697	8	459	564	2805	2	451
transcript_3675	gnl|BL_ORD_ID|28772 transcript_62780	1	2159	2156	2743	136	2285	2958	3556
transcript_92438	gnl|BL_ORD_ID|43866 transcript_6966	1	1719	1714	1946	2	1716	1953	2193
transcript_118859	gnl|BL_ORD_ID|49958 transcript_95459	1123	2390	1	1124	1899	3169	5	1137
transcript_12622	gnl|BL_ORD_ID|80833 transcript_144289	1	1662	1657	1922	249	1919	2035	2300
transcript_55820	gnl|BL_ORD_ID|50569 transcript_96450	1116	2414	1	1118	1657	2955	240	1345
transcript_112608	gnl|BL_ORD_ID|50184 transcript_95805	1	1151	1149	1524	1760	2910	3336	3711
transcript_48276	gnl|BL_ORD_ID|24897 transcript_56264	1550	4130	1	1552	1765	4343	27	1580
transcript_132987	gnl|BL_ORD_ID|45456 transcript_88092	352	3581	1	353	533	3761	37	387
transcript_42434	gnl|BL_ORD_ID|40960 transcript_81767	1	2220	2217	2751	46	2259	2451	2986
transcript_102353	gnl|BL_ORD_ID|50 transcript_67	22	2921	2920	4817	1	2900	3039	4936
transcript_66615	gnl|BL_ORD_ID|15256 transcript_41355	1	1053	1049	1356	1	1053	1175	1483
transcript_14086	gnl|BL_ORD_ID|78012 transcript_139715	1	1511	1510	1824	40	1550	1679	1993
transcript_71973	gnl|BL_ORD_ID|36737 transcript_74911	1	1200	1201	1627	1033	2232	2375	2801
transcript_80493	gnl|BL_ORD_ID|692 transcript_1198	14	1494	1489	2726	2	1481	2146	3383
transcript_55010	gnl|BL_ORD_ID|16497 transcript_43392	1	1681	1679	2042	1	1687	2276	2639
transcript_88031	gnl|BL_ORD_ID|47833 transcript_92015	1007	3572	1	1006	1128	3713	1	1014
transcript_39395	gnl|BL_ORD_ID|10953 transcript_34021	10	1632	1631	2164	2	1622	1797	2337
transcript_138946	gnl|BL_ORD_ID|52519 transcript_99660	185	1474	6	188	505	1802	52	234
transcript_88318	gnl|BL_ORD_ID|66660 transcript_121985	275	1721	3	277	394	1840	13	287
transcript_40299	gnl|BL_ORD_ID|27570 transcript_60772	427	2617	60	426	822	3004	2	368
transcript_95668	gnl|BL_ORD_ID|31558 transcript_66154	145	2235	1	147	2114	4204	311	457
transcript_81927	gnl|BL_ORD_ID|75796 transcript_136085	321	2558	88	322	415	2651	79	313
transcript_73814	gnl|BL_ORD_ID|70357 transcript_127020	123	2030	1	124	1035	2949	240	363
transcript_141313	gnl|BL_ORD_ID|61445 transcript_113447	1	1524	1522	2290	1829	3351	3484	4253
transcript_53086	gnl|BL_ORD_ID|46189 transcript_89304	1	1479	1478	2136	737	2213	2502	3171
transcript_142009	gnl|BL_ORD_ID|59352 transcript_109878	1	2643	2639	3783	64	2705	2848	3989
transcript_77240	gnl|BL_ORD_ID|69342 transcript_9601	542	1872	8	545	746	2089	102	639
transcript_139496	gnl|BL_ORD_ID|48066 transcript_92405	1	1756	1756	2173	508	2263	2389	2806
transcript_67739	gnl|BL_ORD_ID|33343 transcript_69182	1	1439	1438	2177	490	1928	2146	2885
transcript_4696	gnl|BL_ORD_ID|17977 transcript_3211	312	2563	4	316	522	2773	35	346
transcript_606	gnl|BL_ORD_ID|14075 transcript_39323	262	3676	23	263	494	3921	30	266
transcript_142525	gnl|BL_ORD_ID|43487 transcript_6209	135	1541	1	138	1000	2406	29	166
transcript_9385	gnl|BL_ORD_ID|36051 transcript_73740	1	1282	1280	2118	8	1289	1488	2324
transcript_97758	gnl|BL_ORD_ID|43332 transcript_5881	127	975	1	129	1547	2396	339	467
transcript_968	gnl|BL_ORD_ID|23990 transcript_54762	2	2859	2857	3463	1	2862	3796	4405
transcript_125247	gnl|BL_ORD_ID|60380 transcript_111597	1	2571	2567	2716	19	2590	2746	2895
transcript_85950	gnl|BL_ORD_ID|60008 transcript_110993	1141	2502	1	1142	1319	2680	1	1142
transcript_141165	gnl|BL_ORD_ID|62 transcript_85	1	4470	4471	4856	2	4470	4583	4969
transcript_143881	gnl|BL_ORD_ID|18455 transcript_4187	2	2084	2084	2464	35	2117	2264	2644
transcript_72635	gnl|BL_ORD_ID|77988 transcript_139681	17	2140	2142	3621	2	2118	2243	3728
transcript_92438	gnl|BL_ORD_ID|56298 transcript_7503	1	1719	1714	1946	2	1740	1983	2218
transcript_4313	gnl|BL_ORD_ID|61753 transcript_113940	281	2608	3	284	461	2788	2	283
transcript_107559	gnl|BL_ORD_ID|49527 transcript_94776	243	1141	3	246	389	1291	1	244
transcript_122644	gnl|BL_ORD_ID|82641 transcript_11598	1	1304	1303	1629	161	1464	1619	1945
transcript_35533	gnl|BL_ORD_ID|63318 transcript_116497	684	2647	80	688	836	2798	89	698
transcript_73790	gnl|BL_ORD_ID|874 transcript_14148	116	1435	1	119	468	1788	1	119
transcript_12510	gnl|BL_ORD_ID|43463 transcript_6169	1	1727	1722	1923	1	1755	2036	2239
transcript_87260	gnl|BL_ORD_ID|70564 transcript_127359	2	2161	2162	2896	1	2159	2453	3191
transcript_95400	gnl|BL_ORD_ID|39648 transcript_79644	1	1637	1635	2229	4	1626	1730	2323
transcript_3542	gnl|BL_ORD_ID|58568 transcript_108584	896	2715	97	901	1016	2835	2	808
transcript_130649	gnl|BL_ORD_ID|48990 transcript_93893	1	1387	1388	1878	1181	2569	2744	3234
transcript_65613	gnl|BL_ORD_ID|56551 transcript_7980	1	1011	1010	1701	130	1139	1512	2203
transcript_3698	gnl|BL_ORD_ID|12491 transcript_36617	106	2623	10	110	3195	5688	1262	1362
transcript_131998	gnl|BL_ORD_ID|73492 transcript_132170	103	2349	1	104	2472	4717	2010	2113
transcript_111868	gnl|BL_ORD_ID|63771 transcript_117271	316	1938	63	318	1872	3496	6	261
transcript_87639	gnl|BL_ORD_ID|43658 transcript_6575	220	1170	24	223	1287	2243	2	201
transcript_90813	gnl|BL_ORD_ID|76425 transcript_137129	153	1516	2	155	321	1686	43	196
transcript_6858	gnl|BL_ORD_ID|33050 transcript_68677	1	1632	1631	2252	1	1637	1887	2505
transcript_54688	gnl|BL_ORD_ID|72880 transcript_131156	191	1398	2	191	407	1637	28	217
transcript_122809	gnl|BL_ORD_ID|56298 transcript_7503	1	1705	1701	1999	1	1728	1960	2254
transcript_97889	gnl|BL_ORD_ID|45772 transcript_88596	143	2972	1	145	1725	4570	20	165
transcript_53930	gnl|BL_ORD_ID|21438 transcript_50558	1	1310	1309	1600	1449	2758	4221	4512
transcript_72765	gnl|BL_ORD_ID|8295 transcript_2376	1	1608	1607	1945	919	2525	2662	2999
transcript_123547	gnl|BL_ORD_ID|18528 transcript_45641	1	1632	1631	2188	62	1695	2269	2798
transcript_126467	gnl|BL_ORD_ID|35601 transcript_72978	1	1554	1552	1765	123	1676	2837	3051
transcript_43206	gnl|BL_ORD_ID|361 transcript_604	1	1483	1479	2085	1395	2877	3095	3701
transcript_69838	gnl|BL_ORD_ID|44196 transcript_86053	554	2417	8	558	1102	2953	2	554
transcript_142662	gnl|BL_ORD_ID|17122 transcript_44450	1	1178	1174	1871	20	1198	1639	2335
transcript_9134	gnl|BL_ORD_ID|74771 transcript_134384	1	1905	1906	2177	45	1949	2426	2697
transcript_140382	gnl|BL_ORD_ID|68169 transcript_124569	372	2716	6	373	496	2840	1	368
transcript_129632	gnl|BL_ORD_ID|61619 transcript_113720	237	2346	68	241	298	2406	1	174
transcript_1454	gnl|BL_ORD_ID|407 transcript_685	112	2198	2197	3266	3	2090	2623	3695
transcript_127084	gnl|BL_ORD_ID|81187 transcript_144877	1	1903	1903	2409	44	1956	2080	2573
transcript_44221	gnl|BL_ORD_ID|30682 transcript_4684	1156	2359	1	1157	1372	2565	104	1244
transcript_119150	gnl|BL_ORD_ID|62839 transcript_115745	2	2430	2426	2862	1	2418	2999	3434
transcript_136399	gnl|BL_ORD_ID|530 transcript_910	1079	2932	1	1083	1636	3476	1	1046
transcript_111242	gnl|BL_ORD_ID|21845 transcript_51277	1	1389	1387	2237	52	1444	1859	2704
transcript_80069	gnl|BL_ORD_ID|43439 transcript_6113	1	1145	1142	2115	16	1160	1260	2233
transcript_53552	gnl|BL_ORD_ID|61046 transcript_112752	1	1479	1476	2885	380	1851	2279	3684
transcript_116329	gnl|BL_ORD_ID|66839 transcript_122273	202	2251	1	202	820	2869	144	345
transcript_60765	gnl|BL_ORD_ID|1441 transcript_15336	1	1011	1010	1293	283	1293	1444	1727
transcript_143996	gnl|BL_ORD_ID|27853 transcript_61280	469	1216	7	474	620	1356	2	469
transcript_84656	gnl|BL_ORD_ID|51065 transcript_97294	105	4502	1	106	1501	5881	1248	1353
transcript_37015	gnl|BL_ORD_ID|30718 transcript_4747	1	1173	1171	1451	387	1559	2229	2524
transcript_122644	gnl|BL_ORD_ID|82486 transcript_11291	1	1304	1303	1629	140	1443	1598	1924
transcript_36998	gnl|BL_ORD_ID|13313 transcript_37993	1	1459	1458	2409	323	1779	1955	2904
transcript_133516	gnl|BL_ORD_ID|74913 transcript_134620	1	3378	3376	4259	1228	4629	5269	6152
transcript_54644	gnl|BL_ORD_ID|50817 transcript_96876	1	1260	1255	1678	1	1243	1751	2173
transcript_103518	gnl|BL_ORD_ID|50912 transcript_97046	1	2067	2065	3054	781	2848	3315	4304
transcript_78678	gnl|BL_ORD_ID|69524 transcript_125654	1	707	708	998	726	1432	2420	2710
transcript_93471	gnl|BL_ORD_ID|76422 transcript_137126	1	1358	1358	1964	1	1356	1637	2243
transcript_65500	gnl|BL_ORD_ID|83784 transcript_13967	191	1060	9	193	673	1541	2	186
transcript_8633	gnl|BL_ORD_ID|39219 transcript_78941	617	2185	83	617	658	2226	1	535
transcript_109067	gnl|BL_ORD_ID|80292 transcript_143414	1	1664	1663	1874	1094	2760	2949	3160
transcript_7818	gnl|BL_ORD_ID|23205 transcript_53509	11	1528	1529	2218	2	1519	1707	2396
transcript_126326	gnl|BL_ORD_ID|26278 transcript_58511	10	2080	2077	3746	31	2100	2718	4364
transcript_67967	gnl|BL_ORD_ID|43463 transcript_6169	1	1876	1877	2078	2	1896	1707	1924
transcript_67908	gnl|BL_ORD_ID|45738 transcript_88554	157	3231	10	160	293	3367	25	175
transcript_1513	gnl|BL_ORD_ID|39290 transcript_79046	1	2658	2657	3226	85	2754	2934	3489
transcript_9630	gnl|BL_ORD_ID|38361 transcript_77577	326	2035	34	329	1298	3007	2	297
transcript_90390	gnl|BL_ORD_ID|70644 transcript_127492	325	1735	74	326	3379	4790	2	254
transcript_4083	gnl|BL_ORD_ID|8297 transcript_2378	101	2363	2362	2659	99	2361	2639	2936
transcript_120433	gnl|BL_ORD_ID|47898 transcript_92126	1053	2233	1	1057	2556	3755	1	1061
transcript_70445	gnl|BL_ORD_ID|37081 transcript_75503	1	1094	1093	1919	1009	2102	2820	3644
transcript_33679	gnl|BL_ORD_ID|13885 transcript_38995	502	1814	7	504	1217	2528	2	499
transcript_144142	gnl|BL_ORD_ID|26835 transcript_59508	1	1163	1163	1680	364	1526	1635	2147
transcript_655	gnl|BL_ORD_ID|77037 transcript_138117	1182	3766	1	1181	1512	4089	198	1388
transcript_43218	gnl|BL_ORD_ID|26270 transcript_58499	3	3078	3076	3479	1	3078	3443	3846
transcript_124886	gnl|BL_ORD_ID|47587 transcript_91588	1	1453	1450	2233	631	2083	2609	3391
transcript_11461	gnl|BL_ORD_ID|41998 transcript_83555	131	1996	1	131	425	2288	12	157
transcript_24263	gnl|BL_ORD_ID|65057 transcript_119370	238	1011	28	238	1323	2099	1	211
transcript_12892	gnl|BL_ORD_ID|56108 transcript_7117	166	1914	1	170	587	2335	55	224
transcript_7408	gnl|BL_ORD_ID|61347 transcript_113260	1	1562	1559	2237	1	1564	1850	2527
transcript_101567	gnl|BL_ORD_ID|29106 transcript_63347	1	1171	1166	2091	472	1634	2094	3019
transcript_94686	gnl|BL_ORD_ID|85397 transcript_134931	501	988	1	502	1713	2200	186	675
transcript_144841	gnl|BL_ORD_ID|63340 transcript_116529	1	598	599	989	33	632	807	1197
transcript_144179	gnl|BL_ORD_ID|17107 transcript_44432	369	3120	6	369	883	3633	2	365
transcript_90032	gnl|BL_ORD_ID|20717 transcript_49339	1	2627	2628	2983	1258	3879	4068	4424
transcript_50042	gnl|BL_ORD_ID|22641 transcript_52605	1	1388	1386	1743	318	1705	2149	2506
transcript_66430	gnl|BL_ORD_ID|57750 transcript_107217	125	2444	1	124	557	2876	32	155
transcript_57475	gnl|BL_ORD_ID|21283 transcript_50305	280	2319	98	281	353	2392	32	215
transcript_142430	gnl|BL_ORD_ID|23552 transcript_54066	122	1536	1	125	405	1818	1	125
transcript_99558	gnl|BL_ORD_ID|18348 transcript_3954	1	2061	2057	2448	1	2042	2162	2553
transcript_40775	gnl|BL_ORD_ID|43224 transcript_5672	406	2317	7	406	542	2454	2	401
transcript_65500	gnl|BL_ORD_ID|37166 transcript_75639	191	1060	2	193	703	1571	25	216
transcript_107938	gnl|BL_ORD_ID|38313 transcript_77503	439	2425	76	439	498	2484	2	386
transcript_39971	gnl|BL_ORD_ID|31852 transcript_66652	15	2850	2847	3347	12	2850	2998	3497
transcript_49264	gnl|BL_ORD_ID|83609 transcript_13610	1	1087	1087	1196	371	1457	1670	1773
transcript_69050	gnl|BL_ORD_ID|11569 transcript_35118	1	1538	1537	2371	482	2021	5611	6444
transcript_61835	gnl|BL_ORD_ID|72065 transcript_129808	663	2987	76	663	855	3181	2	590
transcript_115348	gnl|BL_ORD_ID|47809 transcript_91972	459	1003	7	460	1351	1895	2	431
transcript_5416	gnl|BL_ORD_ID|42916 transcript_85087	1	1584	1583	2431	1	1584	2305	3189
transcript_116864	gnl|BL_ORD_ID|22375 transcript_52149	1	1054	1051	1244	82	1115	1894	2087
transcript_75450	gnl|BL_ORD_ID|49041 transcript_93976	11	2053	2053	2202	2	2044	2144	2302
transcript_53660	gnl|BL_ORD_ID|1007 transcript_14428	1	1092	1089	1401	2	1093	1494	1806
transcript_6328	gnl|BL_ORD_ID|30568 transcript_4469	1	1276	1271	2205	1	1274	1604	2539
transcript_66531	gnl|BL_ORD_ID|64931 transcript_119150	1	1999	2000	2760	1	2017	2117	2862
transcript_106509	gnl|BL_ORD_ID|58 transcript_80	1037	2659	1	1036	3362	4984	2196	3231
transcript_50884	gnl|BL_ORD_ID|69548 transcript_125694	222	2353	2	226	422	2553	1	225
transcript_20361	gnl|BL_ORD_ID|58449 transcript_108393	317	1374	41	318	781	1838	2	279
transcript_3156	gnl|BL_ORD_ID|411 transcript_691	2	2113	2111	2782	88	2199	3035	3706
transcript_69659	gnl|BL_ORD_ID|49301 transcript_94416	1	1304	1301	2416	265	1569	1939	3056
transcript_109110	gnl|BL_ORD_ID|25192 transcript_56756	1	2116	2116	2515	665	2759	2864	3256
transcript_91307	gnl|BL_ORD_ID|22454 transcript_52264	1	1442	1439	2198	5	1446	2041	2800
transcript_142825	gnl|BL_ORD_ID|77604 transcript_139027	466	1823	7	465	849	2206	2	458
transcript_12510	gnl|BL_ORD_ID|83792 transcript_4777	1	1727	1722	1923	1	1729	2010	2217
transcript_128002	gnl|BL_ORD_ID|21433 transcript_50550	6	582	581	1066	482	1074	1423	1927
transcript_43052	gnl|BL_ORD_ID|49039 transcript_93972	1	1805	1804	2270	1	1804	1907	2372
transcript_2146	gnl|BL_ORD_ID|24515 transcript_55632	1	2591	2590	3042	1	2591	2764	3216
transcript_102747	gnl|BL_ORD_ID|25501 transcript_57239	200	2419	19	202	982	3233	89	272
transcript_116475	gnl|BL_ORD_ID|56132 transcript_7158	1	1443	1441	1902	175	1617	1846	2307
transcript_125889	gnl|BL_ORD_ID|111 transcript_180	1	2186	2184	3162	28	2213	3516	4494
transcript_15200	gnl|BL_ORD_ID|37787 transcript_76630	661	1784	86	663	2052	3181	1	577
transcript_63645	gnl|BL_ORD_ID|30908 transcript_5099	142	2337	1	141	329	2522	6	145
transcript_103987	gnl|BL_ORD_ID|69163 transcript_9257	1	1149	1145	1505	71	1213	1761	2126
transcript_41727	gnl|BL_ORD_ID|8024 transcript_1907	1002	2554	1	1003	1586	3139	459	1467
transcript_46644	gnl|BL_ORD_ID|2388 transcript_17317	1	1156	1157	1531	4	1165	1267	1643
transcript_128778	gnl|BL_ORD_ID|50123 transcript_95712	13	1925	1923	2233	2	1915	2045	2356
transcript_85934	gnl|BL_ORD_ID|58748 transcript_108859	1	1018	1019	1949	697	1714	2376	3306
transcript_44524	gnl|BL_ORD_ID|16622 transcript_43610	2	2177	2174	2659	68	2219	2322	2806
transcript_5172	gnl|BL_ORD_ID|42916 transcript_85087	1	1584	1583	2467	1	1584	2305	3189
transcript_106961	gnl|BL_ORD_ID|71263 transcript_128471	1	1210	1209	2390	548	1757	1909	3090
transcript_39098	gnl|BL_ORD_ID|43382 transcript_5995	210	2233	2	212	393	2419	8	218
transcript_11383	gnl|BL_ORD_ID|8326 transcript_2432	196	2000	1	196	981	2770	118	313
transcript_79135	gnl|BL_ORD_ID|82158 transcript_10978	1	1182	1183	1918	3	1183	1292	2005
transcript_75588	gnl|BL_ORD_ID|32441 transcript_67679	1	1612	1608	1936	198	1786	1886	2211
transcript_79216	gnl|BL_ORD_ID|72195 transcript_130034	114	1044	2	114	451	1381	36	148
transcript_39022	gnl|BL_ORD_ID|42161 transcript_83840	131	1581	1	132	1843	3291	1606	1737
transcript_80208	gnl|BL_ORD_ID|27548 transcript_60738	1	1310	1307	1910	663	1985	2153	2763
transcript_94027	gnl|BL_ORD_ID|16988 transcript_44244	1	1435	1435	2358	1	1436	1920	2845
transcript_111871	gnl|BL_ORD_ID|63671 transcript_117100	1	1008	1004	1310	1	1008	1382	1688
transcript_121242	gnl|BL_ORD_ID|4733 transcript_22025	414	998	1	414	624	1208	37	450
transcript_48439	gnl|BL_ORD_ID|1396 transcript_15240	150	1196	2	152	700	1754	60	208
transcript_117634	gnl|BL_ORD_ID|62870 transcript_115792	1	1863	1863	2393	211	2064	2375	2912
transcript_141072	gnl|BL_ORD_ID|7936 transcript_1733	172	1888	17	174	1267	2983	2	159
transcript_43113	gnl|BL_ORD_ID|69352 transcript_9627	153	1166	2	155	1067	2081	48	201
transcript_66463	gnl|BL_ORD_ID|62066 transcript_114443	475	1705	84	476	741	1973	2	395
transcript_138446	gnl|BL_ORD_ID|67765 transcript_123876	1	1468	1466	1826	98	1585	1936	2296
transcript_54875	gnl|BL_ORD_ID|73157 transcript_131614	1193	2381	1	1194	2346	3536	605	1799
transcript_54197	gnl|BL_ORD_ID|52975 transcript_100406	1656	3469	1	1661	2104	3925	352	2004
transcript_92448	gnl|BL_ORD_ID|18480 transcript_45569	1	1500	1500	2324	989	2488	2984	3808
transcript_119642	gnl|BL_ORD_ID|77735 transcript_139259	1	1743	1744	2563	1054	2796	2943	3759
transcript_94111	gnl|BL_ORD_ID|8183 transcript_2189	1	1926	1921	2548	1	1927	2280	2912
transcript_87067	gnl|BL_ORD_ID|12113 transcript_35979	1	1159	1160	2268	1503	2660	2914	4022
transcript_53274	gnl|BL_ORD_ID|69720 transcript_125983	1	1879	1876	2077	2	1878	2145	2345
transcript_46962	gnl|BL_ORD_ID|8271 transcript_2330	2	2456	2453	2705	18	2472	2748	3000
transcript_45827	gnl|BL_ORD_ID|8386 transcript_2529	252	2514	11	250	392	2650	29	266
transcript_42687	gnl|BL_ORD_ID|66190 transcript_121222	1	1760	1758	2482	324	2083	2269	2997
transcript_10736	gnl|BL_ORD_ID|73334 transcript_131905	12	1815	1813	2063	2	1806	1919	2168
transcript_85265	gnl|BL_ORD_ID|39396 transcript_79236	204	2397	1	206	648	2841	290	495
transcript_139892	gnl|BL_ORD_ID|24447 transcript_55527	1	1550	1549	1871	56	1605	1811	2133
transcript_84363	gnl|BL_ORD_ID|43545 transcript_6328	1	1049	1049	1997	8	1060	1232	2183
transcript_112194	gnl|BL_ORD_ID|83912 transcript_39904	1	1442	1443	2110	436	1860	2367	3036
transcript_112217	gnl|BL_ORD_ID|27452 transcript_60572	13	1383	1381	2388	2	1359	1525	2535
transcript_111607	gnl|BL_ORD_ID|23114 transcript_53358	235	2964	1	236	415	3133	26	260
transcript_96856	gnl|BL_ORD_ID|23466 transcript_53936	23	2472	2468	2984	2	2449	2611	3127
transcript_3548	gnl|BL_ORD_ID|46438 transcript_89707	1	2456	2457	2660	5	2451	2624	2827
transcript_123856	gnl|BL_ORD_ID|29113 transcript_63355	138	1402	1	137	663	1927	418	554
transcript_103987	gnl|BL_ORD_ID|56352 transcript_7600	1	1149	1145	1505	2	1144	1692	2057
transcript_64630	gnl|BL_ORD_ID|43238 transcript_5700	2	2059	2056	2276	61	2097	2233	2453
transcript_73499	gnl|BL_ORD_ID|64982 transcript_119250	1	1675	1675	2138	1	1675	2098	2561
transcript_118704	gnl|BL_ORD_ID|14589 transcript_40205	203	2197	1	206	732	2726	1	206
transcript_51879	gnl|BL_ORD_ID|7802 transcript_1493	1052	2401	1	1053	1913	3264	646	1698
transcript_87639	gnl|BL_ORD_ID|28640 transcript_62571	220	1170	25	222	1974	2930	1	198
transcript_119853	gnl|BL_ORD_ID|34492 transcript_71106	1	3347	3346	3948	1	3349	3507	4111
transcript_86830	gnl|BL_ORD_ID|35101 transcript_72126	304	2885	88	308	428	3011	2	223
transcript_9069	gnl|BL_ORD_ID|43411 transcript_6045	11	1230	1228	2107	2	1221	1540	2419
transcript_34330	gnl|BL_ORD_ID|52461 transcript_99574	1134	2486	1	1138	1504	2854	113	1250
transcript_119152	gnl|BL_ORD_ID|84659 transcript_87576	1	1494	1495	1888	57	1549	1743	2138
transcript_101785	gnl|BL_ORD_ID|28085 transcript_61654	1	1302	1301	1691	1	1280	1642	2032
transcript_85589	gnl|BL_ORD_ID|44127 transcript_85950	1	1630	1631	2127	92	1721	2006	2502
transcript_104573	gnl|BL_ORD_ID|77159 transcript_138314	1	1384	1379	1919	198	1580	1867	2407
transcript_127528	gnl|BL_ORD_ID|50812 transcript_96865	183	1117	2	183	406	1355	9	190
transcript_79665	gnl|BL_ORD_ID|78762 transcript_140901	1	1391	1390	1970	263	1651	1765	2345
transcript_569	gnl|BL_ORD_ID|58083 transcript_107803	1	2288	2287	3808	1	2272	2723	4235
transcript_7011	gnl|BL_ORD_ID|42980 transcript_85188	1	1287	1284	2319	1	1287	1528	2563
transcript_5742	gnl|BL_ORD_ID|43232 transcript_5685	1	1778	1775	2356	1	1778	1880	2461
transcript_102396	gnl|BL_ORD_ID|29115 transcript_63359	1	1140	1138	1982	1	1144	1385	2229
transcript_67967	gnl|BL_ORD_ID|56213 transcript_7321	1	1876	1877	2078	2	1868	1679	1896
transcript_53651	gnl|BL_ORD_ID|58121 transcript_107860	1	1397	1392	2036	1	1393	1697	2341
transcript_76194	gnl|BL_ORD_ID|84032 transcript_49421	1	2217	2217	2467	255	2471	3097	3347
transcript_68990	gnl|BL_ORD_ID|23225 transcript_53551	185	1861	1	180	710	2381	149	332
transcript_46345	gnl|BL_ORD_ID|109 transcript_178	2	2200	2198	4370	6	2204	2322	4495
transcript_94212	gnl|BL_ORD_ID|45526 transcript_88201	1	1611	1610	2011	2	1613	2130	2531
transcript_79698	gnl|BL_ORD_ID|166 transcript_259	1	1444	1443	2540	1367	2810	2930	4020
transcript_36084	gnl|BL_ORD_ID|49791 transcript_95184	1	2367	2367	2619	1038	3405	3597	3858
transcript_37857	gnl|BL_ORD_ID|33911 transcript_70173	566	1716	74	570	1167	2315	427	922
transcript_39842	gnl|BL_ORD_ID|41809 transcript_83250	1	1569	1567	2152	54	1598	1738	2323
transcript_15916	gnl|BL_ORD_ID|16904 transcript_44103	391	1715	83	393	638	1959	5	316
transcript_106401	gnl|BL_ORD_ID|33911 transcript_70173	419	1762	74	421	990	2331	427	773
transcript_110810	gnl|BL_ORD_ID|58706 transcript_108799	1	1097	1096	1841	152	1250	1372	2117
transcript_110059	gnl|BL_ORD_ID|45009 transcript_87344	1056	2237	1	1056	4482	5665	47	1138
transcript_117698	gnl|BL_ORD_ID|11772 transcript_35436	1	1140	1139	1980	4	1143	1606	2447
transcript_87555	gnl|BL_ORD_ID|11296 transcript_34609	1	1242	1242	2120	46	1287	2446	3324
transcript_14260	gnl|BL_ORD_ID|83027 transcript_12382	121	1812	1	124	246	1937	1	124
transcript_12510	gnl|BL_ORD_ID|82035 transcript_10728	1	1727	1722	1923	1	1727	1844	2051
transcript_117312	gnl|BL_ORD_ID|18172 transcript_3570	202	2539	1	202	394	2731	86	287
transcript_955	gnl|BL_ORD_ID|39350 transcript_79147	522	3000	59	521	624	3092	4	466
transcript_80054	gnl|BL_ORD_ID|14086 transcript_39346	286	1118	47	290	534	1366	1	245
transcript_44524	gnl|BL_ORD_ID|27232 transcript_60184	2	2177	2174	2564	138	2335	2438	2828
transcript_128579	gnl|BL_ORD_ID|79909 transcript_142773	1119	2631	1	1121	1247	2763	3	1126
transcript_680	gnl|BL_ORD_ID|49893 transcript_95352	1	2651	2651	3716	1	2651	2768	3832
transcript_24413	gnl|BL_ORD_ID|12618 transcript_36824	379	983	1	381	896	1497	367	744
transcript_124906	gnl|BL_ORD_ID|393 transcript_661	1	1567	1566	1791	729	2293	3497	3722
transcript_119642	gnl|BL_ORD_ID|62964 transcript_115943	1	1743	1744	2520	920	2662	2809	3569
transcript_51781	gnl|BL_ORD_ID|68814 transcript_8588	1	1625	1623	1993	6	1630	1809	2179
transcript_129280	gnl|BL_ORD_ID|18075 transcript_3374	115	1773	1	114	1145	2803	222	335
transcript_129212	gnl|BL_ORD_ID|53040 transcript_100506	1	2391	2389	3061	363	2756	4613	5279
transcript_24656	gnl|BL_ORD_ID|28736 transcript_62721	1	568	567	995	1	561	2075	2506
transcript_136546	gnl|BL_ORD_ID|61544 transcript_113607	860	2041	9	864	1109	2291	2	856
transcript_89511	gnl|BL_ORD_ID|61440 transcript_113438	1084	2503	1	1084	1209	2628	18	1101
transcript_138698	gnl|BL_ORD_ID|29386 transcript_63802	1	1199	1198	1991	1	1200	1335	2127
transcript_44920	gnl|BL_ORD_ID|56495 transcript_7866	1	1829	1827	1979	30	1858	2090	2243
transcript_111871	gnl|BL_ORD_ID|1965 transcript_16454	1	1008	1004	1278	1	1008	1388	1660
transcript_94291	gnl|BL_ORD_ID|53238 transcript_100874	1	1077	1077	1640	655	1729	1835	2397
transcript_64953	gnl|BL_ORD_ID|66201 transcript_121244	1	1040	1039	1550	1	1045	1892	2406
transcript_45638	gnl|BL_ORD_ID|36118 transcript_73845	110	1586	10	111	203	1679	2	101
transcript_120433	gnl|BL_ORD_ID|25425 transcript_57114	1053	2219	1	1057	2471	3636	1	1058
transcript_139676	gnl|BL_ORD_ID|45238 transcript_87722	168	2996	1	167	325	3154	23	190
transcript_126047	gnl|BL_ORD_ID|43466 transcript_6172	418	1407	65	421	1421	2410	1	357
transcript_61866	gnl|BL_ORD_ID|16263 transcript_43004	1	1016	1015	1779	1	990	1193	1957
transcript_78319	gnl|BL_ORD_ID|52338 transcript_99374	526	2445	87	527	813	2732	1	429
transcript_93640	gnl|BL_ORD_ID|66747 transcript_122131	1	1338	1336	2000	3	1342	1447	2111
transcript_7800	gnl|BL_ORD_ID|43555 transcript_6345	1	2126	2122	2257	4	2130	2255	2391
transcript_53922	gnl|BL_ORD_ID|30723 transcript_4753	488	2266	5	489	748	2557	109	604
transcript_47033	gnl|BL_ORD_ID|16420 transcript_43245	1	2266	2263	2485	46	2291	2645	2867
transcript_39291	gnl|BL_ORD_ID|18642 transcript_45860	124	1279	1	125	951	2106	660	784
transcript_102891	gnl|BL_ORD_ID|37598 transcript_76343	1523	3385	1	1524	2071	3912	388	1909
transcript_142525	gnl|BL_ORD_ID|67613 transcript_123632	135	1515	1	140	632	2013	11	156
transcript_131998	gnl|BL_ORD_ID|64346 transcript_118237	103	2349	1	104	1952	4197	1489	1592
transcript_34847	gnl|BL_ORD_ID|53323 transcript_101022	1	1983	1982	3561	256	2222	2329	3891
transcript_139656	gnl|BL_ORD_ID|57623 transcript_107009	1	1254	1253	1760	754	2009	2712	3219
transcript_99125	gnl|BL_ORD_ID|34403 transcript_70969	747	1705	82	748	1513	2470	2	668
transcript_55973	gnl|BL_ORD_ID|56194 transcript_7274	187	2039	1	187	461	2313	8	194
transcript_23597	gnl|BL_ORD_ID|39794 transcript_79862	264	1066	3	265	827	1629	1	263
transcript_144845	gnl|BL_ORD_ID|81144 transcript_144810	2692	5727	2	2694	2816	5860	8	2701
transcript_71101	gnl|BL_ORD_ID|78760 transcript_140897	2	2278	2276	2498	20	2299	2955	3176
transcript_40867	gnl|BL_ORD_ID|20577 transcript_49102	1	2462	2460	3377	98	2545	4000	4917
transcript_48514	gnl|BL_ORD_ID|4047 transcript_20714	1	1076	1074	1177	110	1192	1335	1447
transcript_70132	gnl|BL_ORD_ID|113 transcript_183	280	4085	13	282	655	4463	2	268
transcript_88721	gnl|BL_ORD_ID|47489 transcript_91441	1	2018	2014	2995	1059	3066	3344	4321
transcript_112198	gnl|BL_ORD_ID|8223 transcript_2250	282	2790	54	284	532	3009	81	312
transcript_35620	gnl|BL_ORD_ID|555 transcript_952	1039	3169	1	1044	1386	3516	21	1063
transcript_51747	gnl|BL_ORD_ID|75117 transcript_134940	1	1504	1502	1893	1	1504	1657	2048
transcript_95337	gnl|BL_ORD_ID|36434 transcript_74377	1	1329	1327	1643	235	1557	1737	2049
transcript_16015	gnl|BL_ORD_ID|646 transcript_1116	275	1635	9	276	2089	3449	2	269
transcript_3987	gnl|BL_ORD_ID|66090 transcript_121055	2	2059	2056	2624	1	2058	2165	2733
transcript_66602	gnl|BL_ORD_ID|20053 transcript_48218	1	1028	1028	2008	1523	2575	2823	3808
transcript_16875	gnl|BL_ORD_ID|50944 transcript_97098	1	1079	1075	1664	2	1078	1194	1781
transcript_120922	gnl|BL_ORD_ID|68266 transcript_124744	1	1923	1921	2596	1	1923	3270	3944
transcript_100644	gnl|BL_ORD_ID|25766 transcript_57665	1	1006	1002	1351	41	1031	1207	1556
transcript_46602	gnl|BL_ORD_ID|18277 transcript_3805	1	1233	1233	2281	2	1235	1448	2496
transcript_7307	gnl|BL_ORD_ID|35458 transcript_72720	1	1138	1135	2247	2	1139	1411	2523
transcript_114655	gnl|BL_ORD_ID|76215 transcript_136775	735	1814	88	736	776	1855	2	656
transcript_134117	gnl|BL_ORD_ID|36159 transcript_73916	176	1779	8	180	1278	2881	2	174
transcript_55140	gnl|BL_ORD_ID|13724 transcript_38701	130	2104	1	131	1605	3562	1	130
transcript_97758	gnl|BL_ORD_ID|76963 transcript_138005	127	975	1	130	892	1741	333	462
transcript_9775	gnl|BL_ORD_ID|66308 transcript_121424	1	1292	1289	2098	601	1892	2083	2888
transcript_46099	gnl|BL_ORD_ID|8280 transcript_2345	1	1456	1457	1999	589	2044	2390	2926
transcript_62052	gnl|BL_ORD_ID|25727 transcript_57607	1	1387	1387	1956	1	1387	1495	2065
transcript_116600	gnl|BL_ORD_ID|77168 transcript_138329	1	1191	1192	1541	1289	2479	2895	3244
transcript_43832	gnl|BL_ORD_ID|80123 transcript_143141	209	2207	1	210	316	2311	1	209
transcript_118618	gnl|BL_ORD_ID|8014 transcript_1887	528	2886	76	529	620	2982	6	448
transcript_135828	gnl|BL_ORD_ID|63074 transcript_116127	115	1880	1879	2575	2	1767	1939	2635
transcript_16628	gnl|BL_ORD_ID|81226 transcript_144938	1	1090	1088	1587	6	1081	2550	3048
transcript_92179	gnl|BL_ORD_ID|63683 transcript_117121	1	2136	2134	2876	7	2138	2608	3348
transcript_96825	gnl|BL_ORD_ID|18276 transcript_3804	1	1425	1420	2542	9	1433	1573	2694
transcript_85465	gnl|BL_ORD_ID|67756 transcript_123861	300	3290	2	299	1421	4416	691	988
transcript_14486	gnl|BL_ORD_ID|56507 transcript_7895	598	1797	8	596	951	2150	1	589
transcript_106327	gnl|BL_ORD_ID|8145 transcript_2131	1	1366	1365	1601	1290	2655	2766	3002
transcript_64769	gnl|BL_ORD_ID|52519 transcript_99660	226	1068	28	229	505	1348	1	202
transcript_52817	gnl|BL_ORD_ID|51966 transcript_98766	1	1072	1072	1656	1	1072	1246	1830
transcript_80753	gnl|BL_ORD_ID|48107 transcript_92475	149	1074	2	148	2289	3203	173	319
transcript_85051	gnl|BL_ORD_ID|57641 transcript_107037	1	1706	1705	1900	858	2563	3374	3569
transcript_92395	gnl|BL_ORD_ID|60515 transcript_111829	1	1223	1221	1628	2	1224	2925	3331
transcript_134799	gnl|BL_ORD_ID|60630 transcript_112043	132	2343	1	131	936	3146	278	408
transcript_96003	gnl|BL_ORD_ID|77380 transcript_138681	1	2276	2276	2522	518	2814	2933	3177
transcript_17789	gnl|BL_ORD_ID|78947 transcript_141189	315	1529	69	316	1448	2661	2	249
transcript_50070	gnl|BL_ORD_ID|66753 transcript_122140	410	2903	7	413	1341	3835	2	407
transcript_21003	gnl|BL_ORD_ID|2754 transcript_18074	202	1317	4	203	441	1556	3	202
transcript_81592	gnl|BL_ORD_ID|60043 transcript_111054	1	1183	1184	1560	543	1784	1911	2298
transcript_15357	gnl|BL_ORD_ID|69323 transcript_9568	1	1157	1154	1749	286	1434	1552	2148
transcript_7122	gnl|BL_ORD_ID|7790 transcript_1468	1	1179	1177	2308	76	1254	2171	3302
transcript_96176	gnl|BL_ORD_ID|74952 transcript_134690	1	1688	1688	2061	1256	2943	3142	3507
transcript_105469	gnl|BL_ORD_ID|21903 transcript_51385	191	2229	1	194	442	2480	83	276
transcript_7992	gnl|BL_ORD_ID|45520 transcript_88193	299	2237	45	300	724	2672	2	257
transcript_140972	gnl|BL_ORD_ID|18595 transcript_45765	142	2701	2697	3158	88	2650	2795	3257
transcript_2294	gnl|BL_ORD_ID|435 transcript_736	123	3011	1	123	789	3676	58	180
transcript_47424	gnl|BL_ORD_ID|82442 transcript_11202	168	1632	2	167	534	1998	8	173
transcript_135729	gnl|BL_ORD_ID|19305 transcript_46979	450	1030	5	451	909	1476	2	448
transcript_92499	gnl|BL_ORD_ID|17473 transcript_45032	1	1346	1345	2265	454	1799	2512	3445
transcript_127829	gnl|BL_ORD_ID|60476 transcript_111765	1	2755	2753	3810	156	2921	3145	4203
transcript_145031	gnl|BL_ORD_ID|26537 transcript_58987	254	2823	2	255	466	3035	53	306
transcript_59013	gnl|BL_ORD_ID|56213 transcript_7321	295	1760	3	299	740	2205	11	307
transcript_106081	gnl|BL_ORD_ID|79748 transcript_142501	1	2224	2223	3262	1	2220	2330	3376
transcript_103987	gnl|BL_ORD_ID|69131 transcript_9189	11	1149	1145	1505	1	1139	1687	2047
transcript_21548	gnl|BL_ORD_ID|28881 transcript_62959	9	660	658	1256	1	652	762	1360
transcript_110347	gnl|BL_ORD_ID|756 transcript_1309	320	3025	9	321	629	3343	45	357
transcript_132875	gnl|BL_ORD_ID|34817 transcript_71645	1	1671	1670	2731	1	1667	1806	2866
transcript_140658	gnl|BL_ORD_ID|8360 transcript_2487	1	1380	1375	2076	50	1430	1999	2700
transcript_127551	gnl|BL_ORD_ID|75905 transcript_136276	995	2421	1	1000	1502	2928	383	1382
transcript_35228	gnl|BL_ORD_ID|8280 transcript_2345	1	1598	1599	2355	447	2044	2200	2956
transcript_137075	gnl|BL_ORD_ID|72875 transcript_131150	318	5181	1	318	490	5354	2	319
transcript_4491	gnl|BL_ORD_ID|52643 transcript_99865	499	2541	65	501	1939	3994	1	436
transcript_44635	gnl|BL_ORD_ID|20361 transcript_48734	2	2112	2111	2883	72	2182	2335	3107
transcript_19553	gnl|BL_ORD_ID|2490 transcript_17539	10	1195	1196	1430	1	1186	1363	1597
transcript_90874	gnl|BL_ORD_ID|252 transcript_396	304	3865	2	305	473	4013	41	344
transcript_107991	gnl|BL_ORD_ID|55143 transcript_104053	31	3935	3933	4751	1	3908	4052	4870
transcript_119059	gnl|BL_ORD_ID|17824 transcript_2884	268	1834	31	267	1293	2858	1	237
transcript_128510	gnl|BL_ORD_ID|14030 transcript_39246	1	2181	2179	2824	477	2658	2786	3431
transcript_142501	gnl|BL_ORD_ID|17503 transcript_45087	1	2606	2603	3334	1269	3873	4050	4763
transcript_20680	gnl|BL_ORD_ID|3176 transcript_18919	178	1315	3	177	354	1491	2	176
transcript_108844	gnl|BL_ORD_ID|18000 transcript_3241	200	2564	2	200	365	2727	58	256
transcript_33631	gnl|BL_ORD_ID|53659 transcript_101597	103	2271	2270	2798	1	2169	2356	2884
transcript_138281	gnl|BL_ORD_ID|77452 transcript_138783	1	1204	1204	1876	1	1204	1407	2079
transcript_117166	gnl|BL_ORD_ID|64501 transcript_118469	1	1794	1792	2153	3674	5467	5590	5951
transcript_127528	gnl|BL_ORD_ID|83651 transcript_13705	183	1117	2	184	939	1873	17	199
transcript_13029	gnl|BL_ORD_ID|72479 transcript_130515	146	1897	11	145	308	2060	1	135
transcript_135786	gnl|BL_ORD_ID|69870 transcript_126246	292	3219	2	292	510	3437	25	315
transcript_117939	gnl|BL_ORD_ID|17785 transcript_2812	220	2559	1	219	524	2863	198	416
transcript_67376	gnl|BL_ORD_ID|43168 transcript_85505	1	1669	1669	1806	225	1893	2010	2147
transcript_71835	gnl|BL_ORD_ID|8364 transcript_2491	1	1516	1511	2009	1	1511	2236	2748
transcript_14238	gnl|BL_ORD_ID|56329 transcript_7565	189	1813	2	192	662	2286	46	236
transcript_89902	gnl|BL_ORD_ID|69922 transcript_126326	208	3086	2	207	855	3760	40	245
transcript_20361	gnl|BL_ORD_ID|73514 transcript_132214	316	1374	35	318	689	1747	2	285
transcript_71124	gnl|BL_ORD_ID|43411 transcript_6045	1	1198	1196	2075	1	1221	1540	2419
transcript_8957	gnl|BL_ORD_ID|56351 transcript_7598	370	2145	41	374	494	2271	2	333
transcript_115974	gnl|BL_ORD_ID|81556 transcript_145481	22	2324	2320	2827	2	2320	3133	3651
transcript_17241	gnl|BL_ORD_ID|38964 transcript_78558	1	1312	1312	1566	9	1320	1478	1732
transcript_66456	gnl|BL_ORD_ID|20577 transcript_49102	188	2652	1	190	2453	4917	423	612
transcript_69382	gnl|BL_ORD_ID|26074 transcript_58176	520	2529	77	520	798	2805	2	445
transcript_48027	gnl|BL_ORD_ID|45201 transcript_87666	1	1491	1488	1927	868	2372	2478	2922
transcript_11775	gnl|BL_ORD_ID|26084 transcript_58192	1	1099	1098	1948	1	1099	1240	2090
transcript_2583	gnl|BL_ORD_ID|49427 transcript_94628	131	1817	1814	2950	2	1688	2111	3247
transcript_125895	gnl|BL_ORD_ID|30509 transcript_4355	1	1770	1769	2424	34	1799	1960	2611
transcript_9953	gnl|BL_ORD_ID|62990 transcript_115981	506	2101	62	510	551	2147	1	449
transcript_4874	gnl|BL_ORD_ID|46960 transcript_90602	243	2544	17	244	518	2819	14	241
transcript_140243	gnl|BL_ORD_ID|35006 transcript_71978	1	1072	1070	2046	212	1283	1164	2143
transcript_94088	gnl|BL_ORD_ID|56222 transcript_7333	1	1403	1401	1881	3	1405	1543	2023
transcript_47111	gnl|BL_ORD_ID|80672 transcript_144026	189	1284	2	190	302	1385	1	189
transcript_66736	gnl|BL_ORD_ID|28211 transcript_61851	1	1999	1999	2578	165	2163	2265	2832
transcript_106078	gnl|BL_ORD_ID|57438 transcript_106684	185	3159	17	186	940	3914	2	171
transcript_105339	gnl|BL_ORD_ID|26490 transcript_58909	535	1254	8	534	829	1548	4	528
transcript_5566	gnl|BL_ORD_ID|8243 transcript_2289	2	2065	2063	2451	57	2120	2561	2949
transcript_133710	gnl|BL_ORD_ID|79652 transcript_142354	1	1108	1103	1602	25	1132	2245	2745
transcript_14755	gnl|BL_ORD_ID|48769 transcript_93549	239	1772	68	238	273	1806	2	172
transcript_41263	gnl|BL_ORD_ID|47456 transcript_91389	1	1061	1057	1772	1276	2332	2525	3240
transcript_69275	gnl|BL_ORD_ID|23837 transcript_54512	163	2838	1	164	271	2945	1	164
transcript_130178	gnl|BL_ORD_ID|57870 transcript_107424	135	2465	2460	2683	769	3099	3214	3436
transcript_77548	gnl|BL_ORD_ID|80332 transcript_143477	1	1894	1892	2467	1326	3219	3341	3920
transcript_115678	gnl|BL_ORD_ID|27548 transcript_60738	1	1034	1031	1459	956	1985	2153	2581
transcript_2648	gnl|BL_ORD_ID|38361 transcript_77577	1176	2884	1	1178	1299	3007	1	1178
transcript_113356	gnl|BL_ORD_ID|79585 transcript_142250	1	1283	1284	1754	2153	3434	3568	4041
transcript_81986	gnl|BL_ORD_ID|40835 transcript_81559	1	1137	1134	1551	1224	2360	2884	3300
transcript_131751	gnl|BL_ORD_ID|35011 transcript_71985	212	1679	7	212	934	2412	97	298
transcript_143067	gnl|BL_ORD_ID|30641 transcript_4605	1	1323	1321	2436	1	1323	1457	2571
transcript_68928	gnl|BL_ORD_ID|2513 transcript_17589	1	1256	1256	1480	1	1255	1367	1592
transcript_119492	gnl|BL_ORD_ID|69329 transcript_9579	102	1862	1	106	292	2053	6	111
transcript_8767	gnl|BL_ORD_ID|56283 transcript_7474	139	2177	11	138	247	2281	2	129
transcript_84915	gnl|BL_ORD_ID|386 transcript_650	1	2805	2803	3463	41	2839	2996	3663
transcript_121996	gnl|BL_ORD_ID|51123 transcript_97389	1	2120	2120	2724	2085	4205	4309	4912
transcript_124484	gnl|BL_ORD_ID|81149 transcript_144815	9	664	662	1265	2	657	1017	1620
transcript_102798	gnl|BL_ORD_ID|54867 transcript_103575	2	2067	2066	2303	7	2068	2987	3225
transcript_82825	gnl|BL_ORD_ID|13968 transcript_39136	1	1007	1008	1713	44	1050	2092	2797
transcript_123785	gnl|BL_ORD_ID|74426 transcript_133797	669	2654	82	668	818	2801	8	608
transcript_81559	gnl|BL_ORD_ID|67756 transcript_123861	282	3313	2	281	1421	4463	709	988
transcript_21119	gnl|BL_ORD_ID|18257 transcript_3747	171	1331	6	172	1515	2675	2	167
transcript_86501	gnl|BL_ORD_ID|26561 transcript_59026	1	2682	2682	3383	30	2722	3207	3899
transcript_56351	gnl|BL_ORD_ID|79652 transcript_142354	1	1171	1171	1665	23	1192	2251	2745
transcript_75381	gnl|BL_ORD_ID|56185 transcript_7255	1	1182	1183	1867	2	1184	1612	2292
transcript_19389	gnl|BL_ORD_ID|84230 transcript_62355	1	1066	1065	1424	1	1066	1202	1561
transcript_43261	gnl|BL_ORD_ID|17347 transcript_44805	1012	2359	1	1017	2481	3828	279	1296
transcript_61482	gnl|BL_ORD_ID|69922 transcript_126326	296	3231	2	300	858	3797	21	319
transcript_88438	gnl|BL_ORD_ID|29026 transcript_63213	116	1154	1	115	224	1261	1	116
transcript_23416	gnl|BL_ORD_ID|80187 transcript_143252	174	1088	2	174	627	1542	1	173
transcript_19243	gnl|BL_ORD_ID|20857 transcript_49570	460	1494	5	461	617	1651	1	457
transcript_36591	gnl|BL_ORD_ID|59171 transcript_109558	125	1685	1	128	285	1848	11	138
transcript_142525	gnl|BL_ORD_ID|31162 transcript_5571	135	1515	1	138	1059	2440	80	223
transcript_1732	gnl|BL_ORD_ID|432 transcript_728	2	2089	2088	3123	24	2111	2634	3667
transcript_16799	gnl|BL_ORD_ID|63065 transcript_116116	11	1373	1372	1650	1	1363	1501	1779
transcript_101151	gnl|BL_ORD_ID|13682 transcript_38631	1	1546	1542	1949	136	1681	1993	2401
transcript_4418	gnl|BL_ORD_ID|74865 transcript_134533	2	2196	2194	2561	4	2196	2442	2804
transcript_44068	gnl|BL_ORD_ID|38256 transcript_77411	148	3768	1	147	1019	4641	2	147
transcript_65087	gnl|BL_ORD_ID|18125 transcript_3471	1	1316	1317	2352	223	1543	1722	2752
transcript_838	gnl|BL_ORD_ID|37812 transcript_76674	219	3615	1	221	1120	4517	70	290
transcript_134384	gnl|BL_ORD_ID|17849 transcript_2932	1	2427	2423	2696	18	2468	2568	2841
transcript_91497	gnl|BL_ORD_ID|31002 transcript_5276	213	2019	3	214	512	2321	52	261
transcript_121379	gnl|BL_ORD_ID|38362 transcript_77579	1	1478	1478	2362	955	2430	2536	3417
transcript_93348	gnl|BL_ORD_ID|29346 transcript_63743	1	1817	1815	1943	142	1947	2066	2195
transcript_73968	gnl|BL_ORD_ID|48846 transcript_93664	1	1312	1310	2381	66	1374	1657	2727
transcript_74827	gnl|BL_ORD_ID|60521 transcript_111837	1	2132	2133	2479	325	2453	2555	2901
transcript_34881	gnl|BL_ORD_ID|80586 transcript_143888	129	1053	2	131	1159	2096	68	197
transcript_71835	gnl|BL_ORD_ID|17872 transcript_2981	1	1516	1511	2009	1	1516	2241	2739
transcript_977	gnl|BL_ORD_ID|19584 transcript_47418	1376	3471	1	1379	1850	3966	3	1369
transcript_6827	gnl|BL_ORD_ID|69592 transcript_125760	1	1630	1629	2322	1	1620	1853	2548
transcript_76827	gnl|BL_ORD_ID|17777 transcript_2800	1	1269	1268	2471	2	1272	1601	2804
transcript_49699	gnl|BL_ORD_ID|83985 transcript_45932	353	1738	77	355	462	1843	1	280
transcript_8545	gnl|BL_ORD_ID|11397 transcript_34810	1	1725	1728	2193	1	1746	4358	4830
transcript_119938	gnl|BL_ORD_ID|8288 transcript_2362	256	2359	8	257	396	2499	1	258
transcript_106081	gnl|BL_ORD_ID|74 transcript_108	1	2224	2223	3222	1506	3725	3835	4821
transcript_135801	gnl|BL_ORD_ID|29979 transcript_64789	1	2965	2962	3120	95	3062	3394	3552
transcript_78020	gnl|BL_ORD_ID|39228 transcript_78950	530	1738	77	529	814	2022	2	454
transcript_120473	gnl|BL_ORD_ID|188 transcript_288	1	2066	2066	2556	935	3000	3691	4181
transcript_46120	gnl|BL_ORD_ID|450 transcript_770	1	1546	1545	1785	1863	3393	3272	3510
transcript_2263	gnl|BL_ORD_ID|7851 transcript_1564	2	2845	2845	3009	12	2852	2969	3133
transcript_16689	gnl|BL_ORD_ID|85228 transcript_123989	213	1613	3	216	1158	2558	1	213
transcript_47378	gnl|BL_ORD_ID|81974 transcript_10586	1	1226	1227	1924	1	1226	1332	2029
transcript_101575	gnl|BL_ORD_ID|43598 transcript_6449	1	1202	1201	1708	1	1202	1863	2362
transcript_143377	gnl|BL_ORD_ID|60228 transcript_111351	2	2288	2285	3254	17	2302	2429	3401
transcript_5822	gnl|BL_ORD_ID|30635 transcript_4594	1	2011	2010	2432	1	2015	2141	2563
transcript_90607	gnl|BL_ORD_ID|18455 transcript_4187	1	1176	1176	1557	953	2128	2264	2644
transcript_790	gnl|BL_ORD_ID|58709 transcript_108803	1	2207	2204	3570	2	2208	2689	4055
transcript_120473	gnl|BL_ORD_ID|26855 transcript_59538	1	2066	2066	2596	963	3028	3719	4232
transcript_140799	gnl|BL_ORD_ID|28620 transcript_62544	239	1330	3	240	434	1515	8	245
transcript_128034	gnl|BL_ORD_ID|515 transcript_890	2	2574	2575	3225	45	2615	2832	3482
transcript_34010	gnl|BL_ORD_ID|49799 transcript_95194	1	1978	1977	2521	1587	3560	3685	4227
transcript_43208	gnl|BL_ORD_ID|10707 transcript_33640	1	2413	2411	4228	393	2796	3173	4974
transcript_61996	gnl|BL_ORD_ID|2790 transcript_18156	149	1253	2	154	343	1447	90	242
transcript_102865	gnl|BL_ORD_ID|53576 transcript_101456	1	1520	1520	2043	121	1631	1750	2273
transcript_2675	gnl|BL_ORD_ID|64457 transcript_118408	134	2890	10	136	325	3081	2	127
transcript_115360	gnl|BL_ORD_ID|17106 transcript_44429	1	2971	2971	3373	38	3007	4614	5016
transcript_12791	gnl|BL_ORD_ID|62979 transcript_115963	1	1423	1425	1865	1	1425	2408	2848
transcript_92438	gnl|BL_ORD_ID|69425 transcript_9758	1	1719	1714	1946	2	1716	1859	2099
transcript_24458	gnl|BL_ORD_ID|15383 transcript_41563	391	998	2	392	1102	1709	11	401
transcript_96176	gnl|BL_ORD_ID|12167 transcript_36079	1	1688	1688	2061	831	2521	2720	3085
transcript_33580	gnl|BL_ORD_ID|76 transcript_111	1194	2711	1	1198	3180	4697	951	2151
transcript_62520	gnl|BL_ORD_ID|75306 transcript_135257	1	2382	2383	2706	1367	3751	3893	4218
transcript_122296	gnl|BL_ORD_ID|180 transcript_276	1483	2989	1	1488	2688	4190	371	1852
transcript_143754	gnl|BL_ORD_ID|16727 transcript_43797	423	2286	91	423	499	2362	2	333
transcript_62928	gnl|BL_ORD_ID|22933 transcript_53064	1	1602	1599	1817	260	1849	2116	2332
transcript_53873	gnl|BL_ORD_ID|41282 transcript_82334	123	1808	1	125	575	2259	1	123
transcript_119059	gnl|BL_ORD_ID|47012 transcript_90685	268	1834	71	267	323	1888	1	197
transcript_102008	gnl|BL_ORD_ID|58499 transcript_108478	1	1732	1732	2334	4	1736	1841	2444
transcript_144722	gnl|BL_ORD_ID|76488 transcript_137243	1	1505	1504	2236	1	1505	1916	2646
transcript_57526	gnl|BL_ORD_ID|17739 transcript_45466	1276	3207	101	1279	1590	3523	34	1212
transcript_72296	gnl|BL_ORD_ID|44981 transcript_87295	1	1415	1412	1597	1	1428	1544	1729
transcript_1368	gnl|BL_ORD_ID|597 transcript_1036	107	3304	1	107	278	3475	10	115
transcript_81659	gnl|BL_ORD_ID|48938 transcript_93810	1	1128	1125	1857	1307	2435	2883	3614
transcript_57910	gnl|BL_ORD_ID|26634 transcript_59157	1	1320	1318	2222	562	1857	1958	2860
transcript_36852	gnl|BL_ORD_ID|75916 transcript_136288	384	1222	7	385	1220	2058	1	379
transcript_86829	gnl|BL_ORD_ID|61535 transcript_113591	14	2218	2216	2526	2	2209	2318	2629
transcript_55897	gnl|BL_ORD_ID|81144 transcript_144810	173	3185	1	175	2816	5856	2527	2701
transcript_38677	gnl|BL_ORD_ID|84108 transcript_54474	1	1606	1607	1930	48	1653	1944	2268
transcript_559	gnl|BL_ORD_ID|42433 transcript_84292	434	3742	46	436	1704	5019	2	393
transcript_145854	gnl|BL_ORD_ID|7955 transcript_1779	1	1857	1856	2886	68	1943	2074	3105
transcript_53962	gnl|BL_ORD_ID|19166 transcript_46734	644	2065	7	649	1070	2478	2	639
transcript_137607	gnl|BL_ORD_ID|21943 transcript_51452	430	1320	50	431	1118	1994	528	904
transcript_127739	gnl|BL_ORD_ID|1032 transcript_14479	1	1195	1194	1698	1	1196	1317	1821
transcript_130916	gnl|BL_ORD_ID|142 transcript_221	2	3222	3220	4049	53	3274	3505	4334
transcript_23975	gnl|BL_ORD_ID|85040 transcript_111867	330	1048	4	329	1417	2138	2	328
transcript_79800	gnl|BL_ORD_ID|28447 transcript_62249	1	1007	1005	1511	8	1014	1304	1817
transcript_131988	gnl|BL_ORD_ID|43646 transcript_6547	1	1306	1304	2131	12	1320	1529	2356
transcript_50787	gnl|BL_ORD_ID|78805 transcript_140968	1	1224	1224	2159	543	1766	1949	2883
transcript_42785	gnl|BL_ORD_ID|14292 transcript_39710	223	1680	4	225	847	2303	199	421
transcript_68712	gnl|BL_ORD_ID|66201 transcript_121244	1	1041	1037	1423	1	1045	1987	2377
transcript_76827	gnl|BL_ORD_ID|8338 transcript_2455	1	1269	1268	2471	2	1287	1613	2804
transcript_41397	gnl|BL_ORD_ID|18324 transcript_3898	1	1029	1028	1580	1	1029	2124	2676
transcript_74288	gnl|BL_ORD_ID|56177 transcript_7240	115	2152	1	116	272	2310	1	115
transcript_624	gnl|BL_ORD_ID|80332 transcript_143477	1	3219	3217	3759	1	3219	3341	3883
transcript_3654	gnl|BL_ORD_ID|8100 transcript_2030	259	2731	2	260	597	3069	42	300
transcript_113596	gnl|BL_ORD_ID|57557 transcript_106889	1	2026	2027	2802	4	2030	3444	4219
transcript_33750	gnl|BL_ORD_ID|82113 transcript_10886	12	1426	1425	1877	2	1416	1576	2027
transcript_6132	gnl|BL_ORD_ID|84663 transcript_87751	1	1781	1780	2294	152	1932	2032	2546
transcript_101034	gnl|BL_ORD_ID|56631 transcript_8155	126	1914	1	126	415	2203	1	126
transcript_73068	gnl|BL_ORD_ID|4688 transcript_21928	296	1006	30	300	474	1193	64	334
transcript_23625	gnl|BL_ORD_ID|33052 transcript_68683	161	1043	26	161	496	1378	2	137
transcript_129153	gnl|BL_ORD_ID|11740 transcript_35385	1	1356	1355	1901	26	1379	1539	2085
transcript_7074	gnl|BL_ORD_ID|12025 transcript_35835	12	1303	1299	2314	1	1298	1450	2474
transcript_127551	gnl|BL_ORD_ID|7930 transcript_1723	995	2421	1	1000	1719	3145	600	1599
transcript_101034	gnl|BL_ORD_ID|81664 transcript_9929	126	1912	1	126	295	2088	1	126
transcript_8726	gnl|BL_ORD_ID|40458 transcript_80925	199	2103	1	199	1314	3218	100	298
transcript_120950	gnl|BL_ORD_ID|8365 transcript_2492	378	2681	59	379	644	2942	1	320
transcript_49264	gnl|BL_ORD_ID|71630 transcript_129095	1	1087	1087	1186	386	1500	1710	1809
transcript_2569	gnl|BL_ORD_ID|19147 transcript_46702	179	2917	1	181	490	3229	1	181
transcript_4469	gnl|BL_ORD_ID|18095 transcript_3419	1060	2539	1	1060	1275	2758	1	1060
transcript_70445	gnl|BL_ORD_ID|8241 transcript_2286	1	1094	1093	1949	170	1264	1983	2844
transcript_136252	gnl|BL_ORD_ID|82180 transcript_11021	125	1636	1	128	543	2047	28	156
transcript_126157	gnl|BL_ORD_ID|84041 transcript_50115	1	1059	1058	1649	28	1087	1589	2180
transcript_92025	gnl|BL_ORD_ID|83045 transcript_12428	1	1121	1119	1399	348	1469	1621	1901
transcript_140972	gnl|BL_ORD_ID|44098 transcript_85902	17	2701	2697	3158	2	2698	2843	3305
transcript_100480	gnl|BL_ORD_ID|25886 transcript_57887	1	1344	1342	1896	1	1344	2654	3194
transcript_45194	gnl|BL_ORD_ID|43688 transcript_6640	1	1738	1739	2063	187	1925	2057	2381
transcript_43358	gnl|BL_ORD_ID|63237 transcript_116368	1	2725	2726	3275	1	2709	2887	3459
transcript_98280	gnl|BL_ORD_ID|55176 transcript_104106	1	1004	1000	1585	688	1709	2219	2826
transcript_60825	gnl|BL_ORD_ID|13818 transcript_38858	1	1846	1851	2247	78	1925	2107	2503
transcript_99409	gnl|BL_ORD_ID|40785 transcript_81485	1	5030	5028	5449	2116	7149	7405	7828
transcript_83409	gnl|BL_ORD_ID|18712 transcript_45993	127	2579	1	126	1608	4061	1380	1505
transcript_86982	gnl|BL_ORD_ID|22869 transcript_52968	2	2426	2424	2732	20	2462	2617	2926
transcript_49112	gnl|BL_ORD_ID|68412 transcript_124999	619	4367	68	619	826	4575	1	552
transcript_61326	gnl|BL_ORD_ID|52422 transcript_99512	1	1142	1141	1810	1	1142	2145	2814
transcript_134160	gnl|BL_ORD_ID|44677 transcript_86834	327	1468	6	328	430	1578	3	327
transcript_57392	gnl|BL_ORD_ID|80298 transcript_143428	1015	1963	1	1017	1155	2103	23	1042
transcript_101674	gnl|BL_ORD_ID|43656 transcript_6569	142	1726	1	145	722	2304	68	212
transcript_87362	gnl|BL_ORD_ID|73833 transcript_132741	639	2342	68	640	1349	3053	1	575
transcript_49238	gnl|BL_ORD_ID|60674 transcript_112131	265	1958	41	267	338	2049	2	228
transcript_57967	gnl|BL_ORD_ID|56336 transcript_7579	191	1872	37	192	534	2252	1	156
transcript_47787	gnl|BL_ORD_ID|1034 transcript_14481	1	1005	1002	1414	253	1257	1383	1795
transcript_14823	gnl|BL_ORD_ID|83271 transcript_12877	1	1189	1187	1795	1	1189	1301	1909
transcript_56358	gnl|BL_ORD_ID|77000 transcript_138057	1	1417	1416	2758	114	1540	1773	3116
transcript_87639	gnl|BL_ORD_ID|78875 transcript_141072	220	1170	34	222	836	1789	1	174
transcript_17601	gnl|BL_ORD_ID|60296 transcript_111468	177	1593	2	178	714	2129	37	213
transcript_44826	gnl|BL_ORD_ID|69778 transcript_126094	177	3486	3486	4016	188	3489	5666	6197
transcript_117230	gnl|BL_ORD_ID|246 transcript_389	2	2266	2263	3648	127	2391	2550	3936
transcript_21067	gnl|BL_ORD_ID|24942 transcript_56343	206	1114	5	205	312	1220	1	202
transcript_51793	gnl|BL_ORD_ID|36650 transcript_74749	1	2859	2857	3206	2	2862	3191	3540
transcript_18750	gnl|BL_ORD_ID|2190 transcript_16900	187	1502	3	186	293	1608	2	185
transcript_34573	gnl|BL_ORD_ID|12264 transcript_36253	1	1954	1952	2560	1	1953	2906	3514
transcript_36741	gnl|BL_ORD_ID|60043 transcript_111054	1	1701	1702	2067	39	1784	1911	2287
transcript_126157	gnl|BL_ORD_ID|81014 transcript_144577	1	1059	1058	1649	193	1252	1754	2345
transcript_133044	gnl|BL_ORD_ID|39444 transcript_79306	1218	2791	1	1222	1369	2942	12	1229
transcript_139947	gnl|BL_ORD_ID|141 transcript_220	229	4182	20	231	415	4316	1	211
transcript_11383	gnl|BL_ORD_ID|84304 transcript_66144	196	2000	1	196	1105	2894	118	313
transcript_77039	gnl|BL_ORD_ID|64376 transcript_118279	189	1631	2	189	702	2143	81	268
transcript_45433	gnl|BL_ORD_ID|65491 transcript_120057	122	3290	1	123	797	3977	241	363
transcript_136252	gnl|BL_ORD_ID|79159 transcript_141531	125	1638	1	128	517	2022	4	132
transcript_144845	gnl|BL_ORD_ID|62065 transcript_114440	2692	5718	2	2694	2814	5822	11	2699
transcript_112217	gnl|BL_ORD_ID|30532 transcript_4394	1	1383	1381	2414	4	1386	1552	2585
transcript_12584	gnl|BL_ORD_ID|24056 transcript_54878	1	1266	1265	1918	1	1269	1450	2105
transcript_128510	gnl|BL_ORD_ID|57670 transcript_107092	1	2181	2179	2798	721	2902	3030	3660
transcript_44466	gnl|BL_ORD_ID|13591 transcript_38461	228	2126	28	227	434	2345	2	201
transcript_107547	gnl|BL_ORD_ID|23517 transcript_54016	1	1504	1502	1822	723	2224	2705	3025
transcript_120788	gnl|BL_ORD_ID|75274 transcript_135204	163	1875	1	166	2422	4139	1879	2042
transcript_17388	gnl|BL_ORD_ID|59102 transcript_109454	379	1473	4	380	4884	5934	2948	3308
transcript_129095	gnl|BL_ORD_ID|69256 transcript_9440	1	1502	1500	1809	1	1477	1781	2090
transcript_34010	gnl|BL_ORD_ID|80048 transcript_143012	1	1978	1977	2443	1566	3539	3720	4187
transcript_50734	gnl|BL_ORD_ID|65497 transcript_120067	1	1029	1028	1666	1	1029	1611	2249
transcript_140791	gnl|BL_ORD_ID|18443 transcript_4154	200	2199	1	199	640	2639	255	453
transcript_97913	gnl|BL_ORD_ID|75874 transcript_136220	158	2054	1	160	435	2333	1	160
transcript_130271	gnl|BL_ORD_ID|54430 transcript_102870	1	1035	1032	1457	1764	2798	3082	3487
transcript_121696	gnl|BL_ORD_ID|16317 transcript_43091	223	2727	13	223	809	3314	2	212
transcript_80000	gnl|BL_ORD_ID|81481 transcript_145353	1	1127	1122	1601	290	1415	1569	2048
transcript_46755	gnl|BL_ORD_ID|58235 transcript_108052	1	1170	1171	1888	15	1186	1617	2324
transcript_64449	gnl|BL_ORD_ID|8414 transcript_2575	1	1044	1041	1594	2	1045	2366	2919
transcript_54450	gnl|BL_ORD_ID|61790 transcript_114001	1	1619	1618	2153	45	1664	1855	2390
transcript_84030	gnl|BL_ORD_ID|21987 transcript_51533	1	2044	2043	2787	100	2143	3330	4074
transcript_9330	gnl|BL_ORD_ID|60669 transcript_112124	1	1821	1821	2097	272	2093	2231	2506
transcript_128962	gnl|BL_ORD_ID|14825 transcript_40613	499	2563	8	499	2959	5011	516	1006
transcript_118666	gnl|BL_ORD_ID|18370 transcript_4007	1	2176	2172	2497	1	2180	2282	2607
transcript_95427	gnl|BL_ORD_ID|59292 transcript_109762	1	1564	1562	2047	235	1793	4651	5137
transcript_81368	gnl|BL_ORD_ID|57623 transcript_107009	1	2009	2008	2519	1	2009	2712	3219
transcript_82141	gnl|BL_ORD_ID|65347 transcript_119833	1	1378	1377	1591	81	1456	1759	1973
transcript_74599	gnl|BL_ORD_ID|30884 transcript_5051	1092	2328	1	1092	1207	2448	1	1092
transcript_110577	gnl|BL_ORD_ID|68925 transcript_8818	1	1025	1024	1779	1	1026	1390	2145
transcript_79698	gnl|BL_ORD_ID|205 transcript_324	1	1444	1444	2581	1334	2777	2890	4026
transcript_17530	gnl|BL_ORD_ID|16962 transcript_44205	122	1594	1	125	525	1991	16	139
transcript_143289	gnl|BL_ORD_ID|62268 transcript_114775	295	1383	41	300	647	1736	2	261
transcript_133516	gnl|BL_ORD_ID|29209 transcript_63528	1	3378	3376	4156	177	3551	4191	4971
transcript_104395	gnl|BL_ORD_ID|69394 transcript_9695	1	1280	1280	1883	1	1298	1487	2101
transcript_41225	gnl|BL_ORD_ID|25675 transcript_57524	114	1512	1513	2611	1	1399	1787	2885
transcript_14039	gnl|BL_ORD_ID|71933 transcript_129586	195	1838	23	199	1016	2660	2	178
transcript_120777	gnl|BL_ORD_ID|55484 transcript_104630	1	1099	1097	2034	1	1099	1389	2326
transcript_94791	gnl|BL_ORD_ID|48283 transcript_92760	1	1641	1639	1931	996	2635	2736	3028
transcript_43867	gnl|BL_ORD_ID|69970 transcript_126403	1	1509	1507	2041	458	1966	2691	3225
transcript_56818	gnl|BL_ORD_ID|230 transcript_361	1	1843	1841	2644	2	1844	3240	4049
transcript_9489	gnl|BL_ORD_ID|81238 transcript_144958	1	1725	1722	2109	2	1726	1889	2273
transcript_17885	gnl|BL_ORD_ID|852 transcript_14103	99	1579	1	101	298	1778	1	101
transcript_56626	gnl|BL_ORD_ID|64234 transcript_118050	10	1856	1853	2474	1	1821	2127	2748
transcript_138324	gnl|BL_ORD_ID|52458 transcript_99570	163	1051	3	163	774	1666	2	162
transcript_139609	gnl|BL_ORD_ID|37107 transcript_75544	1	2261	2256	2492	486	2741	3098	3333
transcript_116559	gnl|BL_ORD_ID|77012 transcript_138075	1	1828	1827	2228	5	1832	2826	3227
transcript_85733	gnl|BL_ORD_ID|38139 transcript_77218	20	2059	2060	2240	2	2040	2199	2380
transcript_19561	gnl|BL_ORD_ID|37547 transcript_76265	1	1004	1003	1388	2	1010	1341	1724
transcript_53125	gnl|BL_ORD_ID|18443 transcript_4154	316	2604	93	312	351	2639	2	221
transcript_42876	gnl|BL_ORD_ID|33343 transcript_69182	361	1230	6	362	2146	3015	1572	1928
transcript_90075	gnl|BL_ORD_ID|78468 transcript_140461	563	1345	58	567	1645	2427	1	510
transcript_108379	gnl|BL_ORD_ID|29709 transcript_64325	1	3472	3470	3689	927	4408	4528	4747
transcript_75488	gnl|BL_ORD_ID|51435 transcript_97909	1100	2278	1	1101	1921	3101	253	1351
transcript_129253	gnl|BL_ORD_ID|34404 transcript_70970	176	1725	2	177	1760	3312	40	215
transcript_108390	gnl|BL_ORD_ID|51303 transcript_97679	117	1857	1	117	760	2495	153	269
transcript_108961	gnl|BL_ORD_ID|2402 transcript_17357	1	1119	1118	1298	46	1163	1410	1591
transcript_127244	gnl|BL_ORD_ID|80292 transcript_143414	1	1546	1546	1760	1203	2757	2947	3160
transcript_111675	gnl|BL_ORD_ID|18139 transcript_3502	142	1648	1	143	1201	2707	9	151
transcript_80556	gnl|BL_ORD_ID|52215 transcript_99169	387	2236	48	392	500	2360	1	345
transcript_129151	gnl|BL_ORD_ID|8356 transcript_2482	251	2604	2	256	575	2929	1	254
transcript_9776	gnl|BL_ORD_ID|84049 transcript_50444	1	1739	1738	2115	10	1749	2070	2448
transcript_133178	gnl|BL_ORD_ID|13761 transcript_38769	133	1354	2	137	452	1677	73	208
transcript_99646	gnl|BL_ORD_ID|18327 transcript_3906	1	1583	1584	2569	1	1583	1698	2683
transcript_125262	gnl|BL_ORD_ID|71553 transcript_128977	107	2024	1	112	3111	5018	2896	3007
transcript_70712	gnl|BL_ORD_ID|37975 transcript_76950	119	2533	2531	4545	41	2448	2660	4681
transcript_127528	gnl|BL_ORD_ID|63182 transcript_116288	183	1117	2	183	1107	2041	126	307
transcript_42785	gnl|BL_ORD_ID|36098 transcript_73814	223	1658	48	225	595	2030	1	178
transcript_7365	gnl|BL_ORD_ID|26231 transcript_58440	347	2228	5	347	1033	2908	1	324
transcript_742	gnl|BL_ORD_ID|53323 transcript_101022	1	2098	2097	3696	110	2222	2329	3930
transcript_44392	gnl|BL_ORD_ID|19378 transcript_47088	1	1448	1445	1634	536	1983	2686	2875
transcript_117996	gnl|BL_ORD_ID|84731 transcript_91458	100	2234	1	101	292	2402	56	156
transcript_35881	gnl|BL_ORD_ID|7868 transcript_1600	131	3035	1	134	306	3212	23	156
transcript_94397	gnl|BL_ORD_ID|72510 transcript_130560	1	1560	1559	2126	23	1566	2449	3040
transcript_99400	gnl|BL_ORD_ID|33043 transcript_68666	1	1661	1660	2062	2	1662	1799	2201
transcript_119599	gnl|BL_ORD_ID|81982 transcript_10601	1	1163	1159	1822	1	1163	1316	1979
transcript_104555	gnl|BL_ORD_ID|16275 transcript_43023	1	2084	2083	2802	346	2429	2565	3274
transcript_9987	gnl|BL_ORD_ID|50317 transcript_96020	1	1341	1337	2050	72	1410	1515	2227
transcript_42777	gnl|BL_ORD_ID|46690 transcript_90161	1	1080	1080	1870	943	2022	2420	3210
transcript_51123	gnl|BL_ORD_ID|53576 transcript_101456	1	1398	1398	1937	234	1631	1750	2289
transcript_99364	gnl|BL_ORD_ID|36872 transcript_75160	114	2461	2461	3480	1	2351	2481	3502
transcript_140091	gnl|BL_ORD_ID|54210 transcript_102504	18	1958	1956	2584	1	1941	2046	2674
transcript_116513	gnl|BL_ORD_ID|79275 transcript_141708	1	1728	1723	1939	1	1728	1885	2101
transcript_2410	gnl|BL_ORD_ID|20949 transcript_49724	1093	2985	1	1094	1702	3592	24	1129
transcript_54749	gnl|BL_ORD_ID|49595 transcript_94876	291	1337	34	291	685	1731	2	259
transcript_132388	gnl|BL_ORD_ID|17132 transcript_44463	303	3556	104	304	1115	4367	812	1012
transcript_72911	gnl|BL_ORD_ID|21516 transcript_50695	1	2796	2797	3749	324	3120	3706	4658
transcript_102247	gnl|BL_ORD_ID|68459 transcript_125086	1	2215	2214	2529	13	2229	2340	2655
transcript_130478	gnl|BL_ORD_ID|38762 transcript_78259	134	1644	11	135	266	1791	2	126
transcript_119916	gnl|BL_ORD_ID|64821 transcript_118991	1	1130	1128	1662	2	1131	1496	2030
transcript_139865	gnl|BL_ORD_ID|25947 transcript_57987	1024	2309	1	1026	1838	3123	1	1025
transcript_96903	gnl|BL_ORD_ID|70736 transcript_127654	154	2424	1	155	1325	3589	2	157
transcript_138004	gnl|BL_ORD_ID|73683 transcript_132498	1	1754	1749	2269	180	1934	2120	2640
transcript_9344	gnl|BL_ORD_ID|56249 transcript_7400	1	1254	1253	2119	18	1271	1421	2287
transcript_84040	gnl|BL_ORD_ID|57457 transcript_106725	129	2195	1	130	693	2757	38	166
transcript_117278	gnl|BL_ORD_ID|17473 transcript_45032	1	1798	1797	2691	2	1799	2512	3420
transcript_126972	gnl|BL_ORD_ID|69080 transcript_9079	1	1733	1729	1889	90	1824	1964	2124
transcript_43941	gnl|BL_ORD_ID|32579 transcript_67892	1	1116	1113	1954	288	1404	1512	2352
transcript_129144	gnl|BL_ORD_ID|43737 transcript_6735	1	1282	1281	1676	564	1844	1954	2349
transcript_98280	gnl|BL_ORD_ID|50733 transcript_96714	1	1004	1002	1522	1853	2856	3293	3813
transcript_83155	gnl|BL_ORD_ID|421 transcript_705	1	2282	2283	3519	119	2402	2507	3744
transcript_117416	gnl|BL_ORD_ID|58553 transcript_108561	1	1567	1567	2075	33	1582	1719	2227
transcript_84709	gnl|BL_ORD_ID|429 transcript_720	1	1595	1595	2129	1413	3007	3127	3661
transcript_139347	gnl|BL_ORD_ID|46695 transcript_90167	666	3079	95	671	723	3136	2	578
transcript_90252	gnl|BL_ORD_ID|84258 transcript_63476	1	1293	1293	1897	1	1281	1458	2061
transcript_3113	gnl|BL_ORD_ID|58124 transcript_107863	1	2036	2037	2777	2	2036	3991	4730
transcript_97024	gnl|BL_ORD_ID|74791 transcript_134409	1	1013	1012	1209	2	1015	1158	1355
transcript_43421	gnl|BL_ORD_ID|84119 transcript_55497	1	2139	2139	2441	2666	4802	7066	7368
transcript_44399	gnl|BL_ORD_ID|21645 transcript_50929	1	2359	2358	2702	351	2715	3598	3946
transcript_109372	gnl|BL_ORD_ID|18170 transcript_3560	294	2595	4	298	435	2734	23	311
transcript_114316	gnl|BL_ORD_ID|83233 transcript_12805	1	1271	1271	1758	1	1271	1434	1921
transcript_92292	gnl|BL_ORD_ID|62268 transcript_114775	307	1343	45	310	702	1736	2	262
transcript_11634	gnl|BL_ORD_ID|81846 transcript_10318	226	1990	77	225	312	2075	1	149
transcript_5384	gnl|BL_ORD_ID|30949 transcript_5175	2	2095	2090	2420	7	2070	2181	2510
transcript_110603	gnl|BL_ORD_ID|61184 transcript_112975	31	3278	3276	3707	2	3243	3407	3838
transcript_18587	gnl|BL_ORD_ID|30653 transcript_4622	103	1491	1	103	1170	2558	2	104
transcript_86600	gnl|BL_ORD_ID|75752 transcript_136006	1	1763	1760	2228	149	1906	2080	2546
transcript_38967	gnl|BL_ORD_ID|14722 transcript_40443	1	1016	1013	1457	155	1177	1749	2192
transcript_71835	gnl|BL_ORD_ID|77646 transcript_139102	1	1516	1511	1998	1	1511	2117	2618
transcript_100630	gnl|BL_ORD_ID|31780 transcript_66529	1	1745	1745	2156	1640	3383	3483	3894
transcript_45428	gnl|BL_ORD_ID|33429 transcript_69324	253	1486	3	255	891	2124	300	552
transcript_103606	gnl|BL_ORD_ID|78159 transcript_139957	1	1044	1047	1714	381	1433	2335	3006
transcript_139181	gnl|BL_ORD_ID|53931 transcript_102022	1	2393	2394	3158	992	3384	3704	4471
transcript_50126	gnl|BL_ORD_ID|53767 transcript_101763	1	1200	1201	2259	1262	2452	2706	3772
transcript_73927	gnl|BL_ORD_ID|48651 transcript_93357	1	1253	1251	1642	1	1252	1362	1753
transcript_132253	gnl|BL_ORD_ID|71504 transcript_128895	144	1965	1	147	389	2216	78	224
transcript_90483	gnl|BL_ORD_ID|594 transcript_1030	254	2884	2	259	865	3495	142	399
transcript_49264	gnl|BL_ORD_ID|1077 transcript_14569	1	1087	1087	1187	417	1503	1713	1813
transcript_139529	gnl|BL_ORD_ID|43540 transcript_6319	1	1096	1095	1297	334	1429	2091	2293
transcript_65180	gnl|BL_ORD_ID|23087 transcript_53308	198	3302	1	200	1942	5055	1474	1673
transcript_85628	gnl|BL_ORD_ID|69940 transcript_126357	1	1899	1897	2361	31	1934	2453	2920
transcript_98275	gnl|BL_ORD_ID|41546 transcript_82773	310	1495	50	311	767	1952	326	587
transcript_3272	gnl|BL_ORD_ID|54612 transcript_103161	1	1858	1859	2807	1	1858	2027	2975
transcript_142501	gnl|BL_ORD_ID|41351 transcript_82452	1	2606	2603	3334	195	2799	3331	4044
transcript_118840	gnl|BL_ORD_ID|18242 transcript_3708	1	1337	1336	2172	1	1331	1777	2612
transcript_108102	gnl|BL_ORD_ID|30574 transcript_4479	1	2065	2066	2273	2	2066	2384	2591
transcript_236	gnl|BL_ORD_ID|35703 transcript_73167	1852	4276	1	1853	2948	5371	1	1860
transcript_887	gnl|BL_ORD_ID|34678 transcript_71437	2	2824	2822	3493	4	2826	2954	3625
transcript_145709	gnl|BL_ORD_ID|46707 transcript_90188	2	3826	3825	4292	90	3917	5603	6070
transcript_4998	gnl|BL_ORD_ID|60466 transcript_111739	13	1938	1938	2539	256	2181	2428	3029
transcript_108756	gnl|BL_ORD_ID|344 transcript_566	119	2201	1	119	1713	3795	463	581
transcript_86071	gnl|BL_ORD_ID|55697 transcript_104973	1117	3311	1	1121	3258	5448	1852	2971
transcript_64801	gnl|BL_ORD_ID|22375 transcript_52149	1	1089	1086	1302	24	1115	1894	2109
transcript_12934	gnl|BL_ORD_ID|78282 transcript_140168	1	1348	1345	1886	107	1454	1562	2103
transcript_35343	gnl|BL_ORD_ID|54071 transcript_102264	1525	4027	1	1527	2120	4641	336	1867
transcript_114349	gnl|BL_ORD_ID|32435 transcript_67671	1	1900	1900	2258	41	1942	2218	2575
transcript_47971	gnl|BL_ORD_ID|47784 transcript_91921	496	1215	56	495	560	1280	1	440
transcript_70242	gnl|BL_ORD_ID|36354 transcript_74235	294	4102	2	298	862	4672	17	313
transcript_62490	gnl|BL_ORD_ID|63902 transcript_117509	14	1853	1851	2827	6	1841	2831	3815
transcript_59288	gnl|BL_ORD_ID|49074 transcript_94027	1	1074	1073	2061	2	1074	1385	2374
transcript_96115	gnl|BL_ORD_ID|79585 transcript_142250	1	2664	2665	3038	772	3434	3568	3945
transcript_77926	gnl|BL_ORD_ID|53155 transcript_100710	1	1482	1482	1859	1415	2896	3606	3983
transcript_133374	gnl|BL_ORD_ID|22708 transcript_52705	417	1963	56	419	467	2013	1	364
transcript_3642	gnl|BL_ORD_ID|13473 transcript_38260	190	2686	1	188	368	2864	1	188
transcript_59297	gnl|BL_ORD_ID|62195 transcript_114659	1	1959	1958	2496	2	1955	2578	3116
transcript_1177	gnl|BL_ORD_ID|71086 transcript_128201	1	2463	2464	3409	1	2448	3301	4247
transcript_99397	gnl|BL_ORD_ID|34075 transcript_70434	234	1615	46	237	397	1787	66	258
transcript_57910	gnl|BL_ORD_ID|17828 transcript_2896	1	1320	1318	2218	537	1856	1957	2854
transcript_12218	gnl|BL_ORD_ID|45206 transcript_87673	1	1198	1196	1930	1	1187	1702	2436
transcript_10771	gnl|BL_ORD_ID|70117 transcript_126620	223	2066	89	225	263	2107	1	137
transcript_137085	gnl|BL_ORD_ID|36169 transcript_73932	1	1759	1758	2979	1236	3001	3106	4337
transcript_6665	gnl|BL_ORD_ID|30681 transcript_4680	17	1907	1906	2366	2	1892	2055	2514
transcript_77525	gnl|BL_ORD_ID|20586 transcript_49116	1	1871	1868	2956	3050	4922	5078	6166
transcript_132256	gnl|BL_ORD_ID|45904 transcript_88820	451	2058	59	450	501	2106	1	400
transcript_49501	gnl|BL_ORD_ID|18324 transcript_3898	1	1028	1026	1722	2	1029	1983	2679
transcript_121416	gnl|BL_ORD_ID|28468 transcript_62282	1	1222	1219	1820	197	1423	2415	3014
transcript_113073	gnl|BL_ORD_ID|57168 transcript_106221	217	1445	35	217	374	1613	2	184
transcript_39760	gnl|BL_ORD_ID|61903 transcript_114176	108	1599	1	110	297	1789	43	152
transcript_76474	gnl|BL_ORD_ID|80750 transcript_144155	1	1947	1952	3624	2761	4704	4805	6462
transcript_127146	gnl|BL_ORD_ID|84973 transcript_106843	1	1204	1203	1731	393	1597	1965	2493
transcript_136248	gnl|BL_ORD_ID|40826 transcript_81547	1	1672	1671	2046	23	1694	1962	2337
transcript_84980	gnl|BL_ORD_ID|34419 transcript_70993	1	1156	1154	1838	1070	2225	2371	3056
transcript_96176	gnl|BL_ORD_ID|195 transcript_305	1	1688	1686	2061	1783	3470	3614	3981
transcript_117002	gnl|BL_ORD_ID|57650 transcript_107056	1	1128	1127	1330	613	1740	1879	2082
transcript_22808	gnl|BL_ORD_ID|32440 transcript_67678	332	1152	8	333	1846	2668	5	333
transcript_68809	gnl|BL_ORD_ID|18282 transcript_3815	535	2643	68	536	609	2717	2	470
transcript_1363	gnl|BL_ORD_ID|71086 transcript_128201	2	2311	2312	3258	140	2448	3301	4247
transcript_65108	gnl|BL_ORD_ID|23093 transcript_53323	195	1700	2	198	523	2027	6	204
transcript_51298	gnl|BL_ORD_ID|20476 transcript_48935	1	1287	1283	2429	1465	2752	4239	5385
transcript_52674	gnl|BL_ORD_ID|49482 transcript_94712	1	1730	1730	2067	79	1810	2220	2556
transcript_106081	gnl|BL_ORD_ID|62014 transcript_114359	1	2224	2223	3222	1929	4148	4258	5244
transcript_117996	gnl|BL_ORD_ID|19489 transcript_47269	100	2216	1	101	303	2368	67	167
transcript_140637	gnl|BL_ORD_ID|84934 transcript_105144	1	2023	2022	2129	1186	3208	3350	3462
transcript_114339	gnl|BL_ORD_ID|54726 transcript_103359	1	1325	1321	1721	864	2186	2427	2828
transcript_55073	gnl|BL_ORD_ID|33117 transcript_68792	111	3077	1	107	341	3308	77	183
transcript_44187	gnl|BL_ORD_ID|7960 transcript_1787	1	2552	2550	2886	44	2598	2787	3120
transcript_5013	gnl|BL_ORD_ID|41733 transcript_83107	1	1505	1505	2515	1	1505	1969	2979
transcript_115409	gnl|BL_ORD_ID|45960 transcript_88911	138	1920	1	139	268	2049	2	140
transcript_19540	gnl|BL_ORD_ID|22216 transcript_51887	169	1442	4	168	613	1893	2	166
transcript_136508	gnl|BL_ORD_ID|18521 transcript_45633	1	1470	1467	2181	2141	3612	4144	4858
transcript_98415	gnl|BL_ORD_ID|58452 transcript_108399	1	1803	1800	1930	1414	3216	3572	3702
transcript_122809	gnl|BL_ORD_ID|56233 transcript_7365	1	1705	1701	1969	5	1739	1967	2228
transcript_98202	gnl|BL_ORD_ID|69526 transcript_125658	246	4141	1	249	986	4881	2	250
transcript_57910	gnl|BL_ORD_ID|8398 transcript_2549	1	1320	1318	2222	573	1913	2014	2907
transcript_95901	gnl|BL_ORD_ID|52025 transcript_98866	135	1121	2	136	388	1371	113	247
transcript_9424	gnl|BL_ORD_ID|81240 transcript_144962	1	1647	1649	2150	1	1628	1760	2261
transcript_79698	gnl|BL_ORD_ID|73393 transcript_131994	1	1444	1444	2581	1248	2691	2804	3940
transcript_136508	gnl|BL_ORD_ID|17503 transcript_45087	1	1470	1467	2188	2402	3873	4050	4771
transcript_79068	gnl|BL_ORD_ID|18085 transcript_3396	1	1305	1301	1543	1007	2313	2518	2760
transcript_13005	gnl|BL_ORD_ID|24931 transcript_56322	1	1512	1510	1916	26	1537	2106	2512
transcript_65500	gnl|BL_ORD_ID|2729 transcript_18024	191	1060	2	193	687	1556	6	197
transcript_11167	gnl|BL_ORD_ID|35226 transcript_72343	1	1089	1090	1926	1	1098	1739	2571
transcript_41232	gnl|BL_ORD_ID|75959 transcript_136364	10	1086	1083	1606	2	1084	1237	1759
transcript_109110	gnl|BL_ORD_ID|74202 transcript_133403	1	2116	2116	2515	667	2781	2886	3285
transcript_4048	gnl|BL_ORD_ID|65148 transcript_119504	2	2183	2182	2691	104	2285	2864	3375
transcript_55897	gnl|BL_ORD_ID|74100 transcript_133209	173	3187	1	175	1265	4279	976	1150
transcript_8910	gnl|BL_ORD_ID|37927 transcript_76867	1016	2230	1	1016	1135	2349	2	1013
transcript_128002	gnl|BL_ORD_ID|58188 transcript_107971	6	582	581	1063	132	724	1073	1554
transcript_10389	gnl|BL_ORD_ID|25516 transcript_57257	1	1255	1253	1964	1	1255	1747	2457
transcript_11922	gnl|BL_ORD_ID|11119 transcript_34306	381	1916	8	381	687	2219	1	374
transcript_63945	gnl|BL_ORD_ID|69960 transcript_126388	1	2291	2289	2675	294	2584	3025	3411
transcript_140762	gnl|BL_ORD_ID|8346 transcript_2469	1	1597	1593	2504	4	1589	1924	2836
transcript_24277	gnl|BL_ORD_ID|19363 transcript_47067	223	1016	8	222	647	1443	1	215
transcript_18277	gnl|BL_ORD_ID|852 transcript_14103	99	1535	1	101	298	1730	1	101
transcript_93076	gnl|BL_ORD_ID|68942 transcript_8851	1	1598	1594	1870	54	1651	1884	2160
transcript_108756	gnl|BL_ORD_ID|73961 transcript_132949	119	2206	1	119	1578	3652	322	440
transcript_80753	gnl|BL_ORD_ID|37666 transcript_76443	149	1093	2	148	2235	3183	111	258
transcript_118812	gnl|BL_ORD_ID|56396 transcript_7685	256	1822	35	259	689	2255	2	226
transcript_117358	gnl|BL_ORD_ID|12955 transcript_37382	430	1345	62	433	701	1616	2	373
transcript_40156	gnl|BL_ORD_ID|13328 transcript_38012	369	4237	3	371	787	4652	81	448
transcript_59719	gnl|BL_ORD_ID|85422 transcript_136464	571	1240	9	571	1374	2044	2	564
transcript_128911	gnl|BL_ORD_ID|17825 transcript_2888	1	1734	1733	2627	2	1730	1897	2790
transcript_95337	gnl|BL_ORD_ID|53185 transcript_100773	1	1327	1327	1666	126	1446	1661	1997
transcript_36998	gnl|BL_ORD_ID|8099 transcript_2029	1	1459	1458	2409	474	1931	2107	3075
transcript_4998	gnl|BL_ORD_ID|22018 transcript_51576	1	1938	1936	2541	182	2118	2478	3091
transcript_115535	gnl|BL_ORD_ID|29835 transcript_64563	598	2418	9	600	822	2642	2	593
transcript_45015	gnl|BL_ORD_ID|42689 transcript_84714	611	1474	9	613	751	1614	2	606
transcript_101012	gnl|BL_ORD_ID|84602 transcript_84724	158	2633	1	160	945	3420	7	166
transcript_79135	gnl|BL_ORD_ID|82652 transcript_11622	1	1182	1183	1856	3	1183	1292	1974
transcript_39291	gnl|BL_ORD_ID|51626 transcript_98206	124	1323	1	125	953	2152	663	786
transcript_92438	gnl|BL_ORD_ID|56233 transcript_7365	1	1719	1714	1946	6	1751	1991	2223
transcript_94726	gnl|BL_ORD_ID|53438 transcript_101215	1	1592	1593	1778	1	1561	1939	2124
transcript_47633	gnl|BL_ORD_ID|16023 transcript_42618	1	1146	1145	1811	1	1147	2907	3574
transcript_143534	gnl|BL_ORD_ID|37986 transcript_76971	1	3318	3317	4756	756	4072	4177	5618
transcript_67376	gnl|BL_ORD_ID|81567 transcript_145502	1	1026	1027	1836	220	1245	1632	2441
transcript_90036	gnl|BL_ORD_ID|50769 transcript_96783	315	2070	49	317	466	2223	2	270
transcript_98966	gnl|BL_ORD_ID|35492 transcript_72787	10	1152	1148	1833	2	1142	1256	1941
transcript_44524	gnl|BL_ORD_ID|31254 transcript_65657	2	2177	2174	2660	21	2195	2298	2784
transcript_96176	gnl|BL_ORD_ID|16930 transcript_44149	1	1688	1686	2064	1640	3326	3470	3848
transcript_106081	gnl|BL_ORD_ID|35036 transcript_72019	1	2224	2223	3222	1610	3830	3940	4926
transcript_23022	gnl|BL_ORD_ID|4357 transcript_21302	102	1125	1	102	212	1235	9	110
transcript_139947	gnl|BL_ORD_ID|47489 transcript_91441	137	3243	3239	4182	2	3066	3344	4276
transcript_7646	gnl|BL_ORD_ID|31002 transcript_5276	304	2289	46	305	512	2507	2	261
transcript_113595	gnl|BL_ORD_ID|73374 transcript_131964	207	1199	46	210	365	1357	1	165
transcript_114299	gnl|BL_ORD_ID|71676 transcript_129160	1021	2424	1	1023	1229	2633	31	1054
transcript_101151	gnl|BL_ORD_ID|75045 transcript_134832	1	1546	1542	1903	190	1735	1934	2296
transcript_84688	gnl|BL_ORD_ID|29289 transcript_63656	175	1627	2	175	550	2000	233	406
transcript_16163	gnl|BL_ORD_ID|1412 transcript_15274	1	1205	1206	1684	1	1196	1302	1779
transcript_8895	gnl|BL_ORD_ID|38605 transcript_77985	1073	2165	1	1073	1290	2386	14	1089
transcript_96903	gnl|BL_ORD_ID|72615 transcript_130722	154	2360	1	155	1336	3544	2	162
transcript_71376	gnl|BL_ORD_ID|72110 transcript_129893	116	1927	1	117	236	2047	1	117
transcript_133817	gnl|BL_ORD_ID|57069 transcript_106037	1	1637	1635	3071	1206	2842	3265	4696
transcript_144130	gnl|BL_ORD_ID|54422 transcript_102853	172	1888	1	177	294	2010	1	176
transcript_12510	gnl|BL_ORD_ID|56213 transcript_7321	1	1727	1722	1923	1	1727	2008	2209
transcript_145502	gnl|BL_ORD_ID|27586 transcript_60798	2	2274	2274	2441	7	2288	2404	2573
transcript_70500	gnl|BL_ORD_ID|55856 transcript_105218	1	1718	1717	1974	3	1746	1855	2095
transcript_83953	gnl|BL_ORD_ID|60669 transcript_112124	1	2092	2092	2356	1	2093	2231	2493
transcript_75588	gnl|BL_ORD_ID|77502 transcript_138865	1	1612	1608	1949	129	1744	1844	2181
transcript_103504	gnl|BL_ORD_ID|51422 transcript_97889	164	1210	20	163	1923	2966	1	143
transcript_133102	gnl|BL_ORD_ID|12256 transcript_36235	453	2725	94	453	466	2739	1	359
transcript_96618	gnl|BL_ORD_ID|33968 transcript_70257	1061	2305	1	1060	1528	2772	337	1398
transcript_2238	gnl|BL_ORD_ID|58581 transcript_108610	22	2724	2722	3001	2	2704	2850	3129
transcript_77720	gnl|BL_ORD_ID|83187 transcript_12699	1	1084	1083	1621	8	1091	1339	1877
transcript_97589	gnl|BL_ORD_ID|16204 transcript_42907	328	1959	43	331	1162	2764	2	290
transcript_84021	gnl|BL_ORD_ID|39528 transcript_79451	287	1058	3	292	455	1226	1	290
transcript_3191	gnl|BL_ORD_ID|19147 transcript_46702	159	2806	15	161	490	3143	25	181
transcript_7929	gnl|BL_ORD_ID|18296 transcript_3846	132	2220	11	133	595	2678	3	126
transcript_80585	gnl|BL_ORD_ID|48871 transcript_93710	106	2032	1	108	406	2323	160	267
transcript_72331	gnl|BL_ORD_ID|65385 transcript_119889	1	2556	2554	3188	1767	4341	4451	5097
transcript_34250	gnl|BL_ORD_ID|59413 transcript_109975	292	1499	4	292	1793	3000	1	289
transcript_130178	gnl|BL_ORD_ID|20134 transcript_48358	133	2465	2460	2683	133	2465	2580	2802
transcript_129216	gnl|BL_ORD_ID|81097 transcript_144726	1	1831	1830	2295	1	1831	2649	3114
transcript_60657	gnl|BL_ORD_ID|36153 transcript_73902	260	2015	56	261	323	2078	1	205
transcript_100062	gnl|BL_ORD_ID|17697 transcript_45403	188	2752	1	190	1304	3867	891	1080
transcript_59924	gnl|BL_ORD_ID|30949 transcript_5175	1	1819	1814	2146	252	2070	2181	2511
transcript_145361	gnl|BL_ORD_ID|52606 transcript_99804	1	1579	1579	1764	574	2153	2832	3018
transcript_46676	gnl|BL_ORD_ID|63448 transcript_116713	1	3166	3166	3511	295	3431	3548	3896
transcript_19837	gnl|BL_ORD_ID|1962 transcript_16449	230	1416	39	231	486	1684	31	223
transcript_104319	gnl|BL_ORD_ID|28194 transcript_61824	1737	3862	1	1736	2066	4189	9	1742
transcript_84985	gnl|BL_ORD_ID|47263 transcript_91080	1	1031	1028	1216	572	1603	1965	2153
transcript_4018	gnl|BL_ORD_ID|18820 transcript_46169	1	1606	1605	2654	1	1608	2760	3797
transcript_89496	gnl|BL_ORD_ID|37512 transcript_76212	1353	3276	1	1352	1585	3508	118	1472
transcript_86870	gnl|BL_ORD_ID|41596 transcript_82857	12	1980	1978	2340	2	1970	2336	2698
transcript_145698	gnl|BL_ORD_ID|11376 transcript_34766	1	1885	1883	2562	5051	6935	7568	8252
transcript_137919	gnl|BL_ORD_ID|37267 transcript_75800	1	2425	2424	2709	57	2481	2630	2915
transcript_78697	gnl|BL_ORD_ID|23927 transcript_54657	2	2371	2368	2653	5	2380	3025	3312
transcript_94086	gnl|BL_ORD_ID|49304 transcript_94425	1	1342	1341	2608	112	1447	1551	2814
transcript_93252	gnl|BL_ORD_ID|17521 transcript_45124	320	1691	49	324	429	1801	2	276
transcript_24213	gnl|BL_ORD_ID|38238 transcript_77387	8	585	582	1023	1	578	2017	2458
transcript_104271	gnl|BL_ORD_ID|490 transcript_847	12	2059	2059	3171	2	2053	2493	3585
transcript_138867	gnl|BL_ORD_ID|75668 transcript_135855	1077	2204	1	1077	1214	2341	34	1110
transcript_128081	gnl|BL_ORD_ID|65767 transcript_120510	589	1752	7	591	830	1994	2	586
transcript_123626	gnl|BL_ORD_ID|46189 transcript_89304	1	1573	1574	2570	180	1752	2108	3108
transcript_59013	gnl|BL_ORD_ID|43463 transcript_6169	295	1760	3	299	767	2235	11	309
transcript_142379	gnl|BL_ORD_ID|69864 transcript_126235	292	4091	2	291	642	4441	62	351
transcript_106327	gnl|BL_ORD_ID|56871 transcript_105723	1	1366	1365	1601	1289	2649	4447	4686
transcript_4211	gnl|BL_ORD_ID|20265 transcript_48570	123	1830	1826	2621	306	2013	2138	2933
transcript_48072	gnl|BL_ORD_ID|255 transcript_401	134	2613	1	138	1469	3952	4	141
transcript_131751	gnl|BL_ORD_ID|19607 transcript_47460	212	1679	7	212	966	2444	130	331
transcript_120661	gnl|BL_ORD_ID|74120 transcript_133248	186	1429	2	187	702	1944	3	188
transcript_10356	gnl|BL_ORD_ID|43866 transcript_6966	1	1830	1826	2073	1	1830	1952	2199
transcript_464	gnl|BL_ORD_ID|229 transcript_360	2	2047	2048	3909	12	2058	2195	4056
transcript_70654	gnl|BL_ORD_ID|19893 transcript_47966	3	3251	3249	3603	3	3248	3419	3772
transcript_143127	gnl|BL_ORD_ID|48170 transcript_92579	122	1704	1	125	966	2552	509	633
transcript_85508	gnl|BL_ORD_ID|1272 transcript_14979	339	1715	38	340	414	1800	2	304
transcript_62143	gnl|BL_ORD_ID|37059 transcript_75466	13	1895	1892	2142	1	1880	2009	2259
transcript_56991	gnl|BL_ORD_ID|8253 transcript_2301	98	2673	1	100	431	2988	45	144
transcript_5709	gnl|BL_ORD_ID|35393 transcript_72615	631	2456	92	631	929	2748	24	562
transcript_60924	gnl|BL_ORD_ID|74096 transcript_133200	519	1576	7	519	624	1675	1	516
transcript_67488	gnl|BL_ORD_ID|30047 transcript_64903	1	1227	1226	1852	1133	2360	2496	3108
transcript_12665	gnl|BL_ORD_ID|22641 transcript_52605	1	1665	1663	2021	41	1705	2149	2506
transcript_63977	gnl|BL_ORD_ID|66160 transcript_121175	324	1769	58	323	973	2418	565	830
transcript_19112	gnl|BL_ORD_ID|59413 transcript_109975	295	1463	8	295	1793	3025	1	289
transcript_75567	gnl|BL_ORD_ID|49477 transcript_94705	254	3319	1	256	607	3678	43	299
transcript_116475	gnl|BL_ORD_ID|43534 transcript_6309	1	1443	1442	1904	175	1617	1932	2394
transcript_130916	gnl|BL_ORD_ID|49505 transcript_94744	2	3222	3220	4049	7	3228	3459	4288
transcript_34078	gnl|BL_ORD_ID|7884 transcript_1625	2	2592	2588	2977	19	2610	2763	3152
transcript_111607	gnl|BL_ORD_ID|16399 transcript_43218	236	2964	1	236	720	3435	29	263
transcript_73273	gnl|BL_ORD_ID|42146 transcript_83816	552	2195	94	552	592	2233	1	459
transcript_51107	gnl|BL_ORD_ID|40322 transcript_80708	193	1376	6	198	365	1548	2	193
transcript_51879	gnl|BL_ORD_ID|7763 transcript_1412	1052	2401	1	1053	1913	3261	647	1698
transcript_317	gnl|BL_ORD_ID|28582 transcript_62473	1	2392	2390	4069	1	2392	2577	4256
transcript_16443	gnl|BL_ORD_ID|68494 transcript_125148	1	1065	1064	1612	1	1064	1180	1728
transcript_81401	gnl|BL_ORD_ID|70412 transcript_127108	1	1039	1040	1491	411	1439	2308	2758
transcript_140650	gnl|BL_ORD_ID|38690 transcript_78127	1	1913	1913	3229	1	1912	2139	3455
transcript_12591	gnl|BL_ORD_ID|48592 transcript_93278	1	1691	1686	1912	11	1701	1830	2056
transcript_61734	gnl|BL_ORD_ID|71608 transcript_129063	1	1529	1524	1728	23	1575	1719	1927
transcript_74613	gnl|BL_ORD_ID|50317 transcript_96020	1	1412	1408	2102	4	1410	1515	2227
transcript_103535	gnl|BL_ORD_ID|50294 transcript_95990	1	1137	1133	1974	749	1893	2300	3141
transcript_103525	gnl|BL_ORD_ID|74706 transcript_134281	802	3176	86	805	822	3195	2	721
transcript_106327	gnl|BL_ORD_ID|57111 transcript_106118	1	1366	1365	1601	780	2139	2250	2489
transcript_98857	gnl|BL_ORD_ID|41563 transcript_82802	191	1320	3	191	1081	2210	489	677
transcript_119938	gnl|BL_ORD_ID|68676 transcript_125462	256	2359	8	258	390	2493	2	252
transcript_142631	gnl|BL_ORD_ID|77037 transcript_138117	1481	2937	1	1486	2631	4088	189	1689
transcript_73380	gnl|BL_ORD_ID|8493 transcript_2716	413	1946	5	412	1286	2819	2	410
transcript_41371	gnl|BL_ORD_ID|3573 transcript_19769	1	1028	1023	1287	21	1048	1153	1417
transcript_71092	gnl|BL_ORD_ID|26604 transcript_59096	674	1712	7	676	1099	2131	2	676
transcript_18852	gnl|BL_ORD_ID|2034 transcript_16606	10	1220	1218	1485	2	1212	1396	1678
transcript_129402	gnl|BL_ORD_ID|19672 transcript_47565	1	3154	3153	4450	36	3189	3948	5245
transcript_44862	gnl|BL_ORD_ID|8336 transcript_2451	2	2324	2324	2715	66	2388	2575	2966
transcript_118200	gnl|BL_ORD_ID|71342 transcript_128608	510	1700	6	511	764	1958	78	583
transcript_61014	gnl|BL_ORD_ID|44995 transcript_87317	1	1479	1478	2568	348	1802	1908	2998
transcript_97758	gnl|BL_ORD_ID|1070 transcript_14556	127	975	1	130	923	1772	364	493
transcript_118152	gnl|BL_ORD_ID|40522 transcript_81036	1075	3008	1	1076	1187	3147	1	1086
transcript_96496	gnl|BL_ORD_ID|57819 transcript_107333	1	1146	1143	2144	505	1662	2005	3037
transcript_3168	gnl|BL_ORD_ID|65761 transcript_120496	19	2468	2467	2798	2	2451	4174	4505
transcript_96825	gnl|BL_ORD_ID|23824 transcript_54489	1	1425	1420	2429	6	1455	1595	2604
transcript_65487	gnl|BL_ORD_ID|26491 transcript_58912	1	1746	1744	3260	52	1798	1974	3490
transcript_134606	gnl|BL_ORD_ID|75032 transcript_134816	1	1432	1432	1653	482	1903	2655	2875
transcript_83136	gnl|BL_ORD_ID|76643 transcript_137499	1	1202	1201	1876	780	1984	2230	2905
transcript_48571	gnl|BL_ORD_ID|19591 transcript_47430	1037	2940	1	1038	1489	3407	348	1369
transcript_75090	gnl|BL_ORD_ID|39631 transcript_79609	1	1059	1056	1352	1	1078	2089	2385
transcript_15613	gnl|BL_ORD_ID|84278 transcript_64451	10	1352	1355	1718	2	1369	1684	2047
transcript_128371	gnl|BL_ORD_ID|33216 transcript_68967	1	1339	1337	1997	83	1401	1775	2444
transcript_72140	gnl|BL_ORD_ID|83547 transcript_13464	1	1110	1108	1295	116	1221	1663	1850
transcript_79531	gnl|BL_ORD_ID|65809 transcript_120577	1	1121	1119	1512	24	1144	1271	1664
transcript_116727	gnl|BL_ORD_ID|58647 transcript_108709	1	1050	1049	1419	820	1869	2290	2661
transcript_100112	gnl|BL_ORD_ID|16276 transcript_43024	186	1219	2	188	1255	2288	31	217
transcript_88054	gnl|BL_ORD_ID|71874 transcript_129490	1	1617	1615	1879	1546	3165	3328	3593
transcript_87639	gnl|BL_ORD_ID|36967 transcript_75318	220	1170	50	222	1958	2922	1	174
transcript_51218	gnl|BL_ORD_ID|31841 transcript_66634	465	2516	51	465	574	2630	2	415
transcript_66042	gnl|BL_ORD_ID|70054 transcript_126531	192	1988	1	194	843	2638	478	671
transcript_61717	gnl|BL_ORD_ID|40363 transcript_80779	1	1147	1147	1648	260	1406	1514	2015
transcript_1378	gnl|BL_ORD_ID|76145 transcript_136663	3	3006	3005	3250	1	3004	3232	3477
transcript_76802	gnl|BL_ORD_ID|45575 transcript_88279	284	3099	102	285	395	3213	1	182
transcript_109222	gnl|BL_ORD_ID|34391 transcript_70955	1	2983	2981	3634	37	3035	4306	4962
transcript_120433	gnl|BL_ORD_ID|84184 transcript_59357	1053	2233	1	1057	2308	3488	2	1058
transcript_1846	gnl|BL_ORD_ID|80211 transcript_143284	149	3077	11	147	351	3274	2	130
transcript_83882	gnl|BL_ORD_ID|17973 transcript_3205	265	1501	5	265	1578	2807	18	278
transcript_98966	gnl|BL_ORD_ID|82036 transcript_10730	1	1152	1148	1859	2	1148	1262	1976
transcript_12171	gnl|BL_ORD_ID|17936 transcript_3123	201	1965	25	205	1041	2805	2	181
transcript_52680	gnl|BL_ORD_ID|22152 transcript_51784	149	1285	2	151	3710	4846	1	150
transcript_143805	gnl|BL_ORD_ID|61691 transcript_113842	1	1460	1458	2368	30	1489	1788	2698
transcript_130271	gnl|BL_ORD_ID|52494 transcript_99622	1	1035	1032	1457	1773	2806	3090	3515
transcript_104174	gnl|BL_ORD_ID|49752 transcript_95127	428	1973	99	429	1340	2886	274	604
transcript_92438	gnl|BL_ORD_ID|56130 transcript_7152	1	1719	1714	1946	3	1719	1956	2187
transcript_111513	gnl|BL_ORD_ID|71331 transcript_128591	1181	2396	1	1181	2774	3992	1476	2648
transcript_131569	gnl|BL_ORD_ID|34489 transcript_71101	1	1307	1308	1665	1	1305	2139	2495
transcript_121203	gnl|BL_ORD_ID|12548 transcript_36708	1	1339	1337	2165	2	1339	1589	2417
transcript_44309	gnl|BL_ORD_ID|15379 transcript_41559	1	1424	1420	2183	1	1424	1820	2583
transcript_73340	gnl|BL_ORD_ID|34489 transcript_71101	1	1310	1307	1523	1	1310	2278	2495
transcript_93789	gnl|BL_ORD_ID|18639 transcript_45853	345	1108	7	348	1035	1798	2	344
transcript_70445	gnl|BL_ORD_ID|8187 transcript_2194	1	1094	1093	1949	264	1357	2076	2934
transcript_88554	gnl|BL_ORD_ID|31852 transcript_66652	25	2861	2858	3367	12	2851	3021	3531
transcript_120936	gnl|BL_ORD_ID|22869 transcript_52968	2	2444	2442	2664	27	2462	2617	2836
transcript_80074	gnl|BL_ORD_ID|26451 transcript_58844	1	1630	1626	1901	39	1669	2443	2708
transcript_76212	gnl|BL_ORD_ID|59647 transcript_110356	1164	3493	1	1166	1465	3821	131	1296
transcript_112280	gnl|BL_ORD_ID|79588 transcript_142254	1	1596	1601	1874	30	1650	1996	2270
transcript_128994	gnl|BL_ORD_ID|1412 transcript_15274	1	1210	1211	1629	1	1196	1302	1720
transcript_17197	gnl|BL_ORD_ID|13169 transcript_37744	1	1066	1066	1576	1150	2214	2892	3406
transcript_84289	gnl|BL_ORD_ID|69131 transcript_9189	12	1355	1354	1911	1	1344	1478	2035
transcript_35358	gnl|BL_ORD_ID|40216 transcript_80526	1669	4007	1	1670	1781	4115	1	1670
transcript_34366	gnl|BL_ORD_ID|71551 transcript_128974	112	2159	11	114	475	2515	1	105
transcript_55897	gnl|BL_ORD_ID|74259 transcript_133509	173	3185	1	175	1175	4188	886	1060
transcript_41619	gnl|BL_ORD_ID|1299 transcript_15037	456	1517	59	454	503	1564	2	396
transcript_80488	gnl|BL_ORD_ID|44728 transcript_86913	13	1777	1777	2592	2	1766	2158	2973
transcript_112959	gnl|BL_ORD_ID|77337 transcript_138607	1	1079	1078	1500	13	1091	1696	2118
transcript_67191	gnl|BL_ORD_ID|69187 transcript_9301	10	1219	1218	2029	2	1211	1327	2138
transcript_127551	gnl|BL_ORD_ID|43276 transcript_5766	995	2421	82	1000	1041	2460	1	921
transcript_103907	gnl|BL_ORD_ID|9 transcript_9	1	4565	4563	4767	1449	6016	6137	6341
transcript_75253	gnl|BL_ORD_ID|75791 transcript_136074	14	2829	2827	4238	1	2803	3172	4553
transcript_115965	gnl|BL_ORD_ID|35392 transcript_72614	1	2385	2380	2806	8	2395	2577	3005
transcript_111473	gnl|BL_ORD_ID|73354 transcript_131939	1	1608	1606	2055	1	1611	1796	2245
transcript_65943	gnl|BL_ORD_ID|70563 transcript_127357	1	2014	2013	2409	812	2822	4351	4746
transcript_2903	gnl|BL_ORD_ID|46189 transcript_89304	2	2181	2180	2849	49	2213	2502	3177
transcript_87917	gnl|BL_ORD_ID|18585 transcript_45747	115	1622	1	116	498	2005	153	268
transcript_110096	gnl|BL_ORD_ID|29075 transcript_63287	1	1242	1241	1815	309	1552	1659	2243
transcript_44473	gnl|BL_ORD_ID|14722 transcript_40443	1	1129	1126	1569	39	1177	1749	2192
transcript_143712	gnl|BL_ORD_ID|20379 transcript_48767	1	1819	1822	2069	64	1884	2047	2294
transcript_91704	gnl|BL_ORD_ID|64842 transcript_119023	1	1041	1038	1485	570	1623	1931	2378
transcript_116329	gnl|BL_ORD_ID|25786 transcript_57700	202	2251	1	202	1144	3197	468	669
transcript_127179	gnl|BL_ORD_ID|73296 transcript_131848	1	1579	1578	1897	1	1573	1729	2048
transcript_145032	gnl|BL_ORD_ID|8186 transcript_2192	1	1772	1772	2859	2	1774	1879	2966
transcript_103926	gnl|BL_ORD_ID|34068 transcript_70424	468	1901	6	468	844	2265	2	464
transcript_8317	gnl|BL_ORD_ID|45003 transcript_87333	1	1796	1795	2177	1	1796	1993	2374
transcript_125622	gnl|BL_ORD_ID|43832 transcript_6900	165	1960	1	165	517	2329	56	221
transcript_43753	gnl|BL_ORD_ID|51822 transcript_98514	1	2272	2272	2508	1	2273	2402	2636
transcript_121019	gnl|BL_ORD_ID|78530 transcript_140562	1	1237	1241	2189	2	1238	1797	2745
transcript_103394	gnl|BL_ORD_ID|85001 transcript_108895	1	2039	2040	2461	218	2237	2526	2934
transcript_113258	gnl|BL_ORD_ID|11119 transcript_34306	378	1731	6	379	846	2200	1	374
transcript_137823	gnl|BL_ORD_ID|81480 transcript_145350	1	1713	1711	3113	1	1716	1855	3257
transcript_111501	gnl|BL_ORD_ID|43232 transcript_5685	1	1798	1795	2376	1	1778	1880	2461
transcript_36356	gnl|BL_ORD_ID|54930 transcript_103687	217	2081	46	219	279	2169	2	176
transcript_23904	gnl|BL_ORD_ID|80187 transcript_143252	198	1060	26	198	627	1489	1	173
transcript_66430	gnl|BL_ORD_ID|61963 transcript_114281	124	2444	1	124	625	2945	14	137
transcript_37265	gnl|BL_ORD_ID|19163 transcript_46731	1	1235	1234	1700	332	1565	1698	2210
transcript_112987	gnl|BL_ORD_ID|7771 transcript_1431	1	2611	2609	3172	77	2663	2763	3326
transcript_91784	gnl|BL_ORD_ID|56847 transcript_105685	7	580	578	1105	2	575	1313	1840
transcript_141863	gnl|BL_ORD_ID|73378 transcript_131972	1	1977	1976	2882	560	2539	2664	3601
transcript_103173	gnl|BL_ORD_ID|17543 transcript_45164	1	1190	1190	2227	2	1199	1676	2713
transcript_18340	gnl|BL_ORD_ID|44900 transcript_87188	204	1529	22	205	350	1676	53	236
transcript_104132	gnl|BL_ORD_ID|54554 transcript_103073	1	2005	2003	2304	114	2118	3110	3411
transcript_139547	gnl|BL_ORD_ID|40286 transcript_80652	1	2865	2864	3145	1	2865	3440	3721
transcript_88944	gnl|BL_ORD_ID|46155 transcript_89241	159	1277	2	157	1568	2686	10	165
transcript_71690	gnl|BL_ORD_ID|22158 transcript_51792	156	2878	1	158	263	2982	1	158
transcript_53478	gnl|BL_ORD_ID|52519 transcript_99660	155	1112	2	158	505	1460	79	234
transcript_361	gnl|BL_ORD_ID|24897 transcript_56264	1576	4047	1	1578	1765	4233	1	1580
transcript_2171	gnl|BL_ORD_ID|76557 transcript_137360	1	2416	2416	3008	1	2416	3028	3620
transcript_46120	gnl|BL_ORD_ID|49735 transcript_95101	1	1546	1545	1785	1269	2799	2678	2916
transcript_77867	gnl|BL_ORD_ID|57069 transcript_106037	1	1908	1906	3414	936	2842	3265	4759
transcript_108721	gnl|BL_ORD_ID|56070 transcript_7043	425	2203	51	426	532	2317	2	377
transcript_15278	gnl|BL_ORD_ID|42165 transcript_83847	254	1668	7	254	452	1866	1	248
transcript_136591	gnl|BL_ORD_ID|69179 transcript_9286	122	2016	1	123	244	2138	16	138
transcript_20884	gnl|BL_ORD_ID|19908 transcript_47986	326	1329	5	325	517	1519	4	312
transcript_4188	gnl|BL_ORD_ID|21693 transcript_51008	558	2620	7	558	847	2921	2	555
transcript_78618	gnl|BL_ORD_ID|72777 transcript_130996	284	1918	4	285	455	2088	1	282
transcript_87692	gnl|BL_ORD_ID|43502 transcript_6247	141	2143	1	142	369	2371	104	245
transcript_50396	gnl|BL_ORD_ID|62996 transcript_115995	1	1943	1943	3153	1	1945	2675	3885
transcript_1431	gnl|BL_ORD_ID|24018 transcript_54806	1	3094	3091	3345	40	3157	3451	3707
transcript_48072	gnl|BL_ORD_ID|14017 transcript_39224	134	2620	1	138	1475	3971	43	180
transcript_134022	gnl|BL_ORD_ID|44988 transcript_87309	1	1319	1317	1641	690	2008	2110	2434
transcript_114043	gnl|BL_ORD_ID|30014 transcript_64846	374	1606	7	374	617	1846	2	369
transcript_102529	gnl|BL_ORD_ID|37302 transcript_75859	1	1008	1006	1847	1	1009	1124	1965
transcript_33853	gnl|BL_ORD_ID|54554 transcript_103073	2	2081	2079	2712	39	2118	2776	3409
transcript_106081	gnl|BL_ORD_ID|19078 transcript_46584	1	2224	2223	3177	1134	3353	3463	4399
transcript_59924	gnl|BL_ORD_ID|30961 transcript_5197	1	1819	1814	2147	246	2091	2202	2534
transcript_136910	gnl|BL_ORD_ID|27743 transcript_61079	214	2017	5	215	655	2458	2	212
transcript_133331	gnl|BL_ORD_ID|73618 transcript_132392	134	1868	1	136	591	2305	24	159
transcript_142753	gnl|BL_ORD_ID|11297 transcript_34612	1	2194	2191	2630	31	2210	2378	2817
transcript_138455	gnl|BL_ORD_ID|43306 transcript_5821	1077	2235	1	1078	1294	2453	46	1121
transcript_54692	gnl|BL_ORD_ID|64825 transcript_118997	102	1479	1	103	753	2130	538	640
transcript_112290	gnl|BL_ORD_ID|58048 transcript_107738	295	2008	50	298	463	2169	47	295
transcript_126058	gnl|BL_ORD_ID|20271 transcript_48578	1	1056	1056	1892	1	1056	1388	2224
transcript_64995	gnl|BL_ORD_ID|57328 transcript_106499	229	2322	1	228	1645	3739	240	467
transcript_96178	gnl|BL_ORD_ID|42383 transcript_84209	1	1515	1515	1767	216	1746	2166	2420
transcript_72914	gnl|BL_ORD_ID|17352 transcript_44814	1	1378	1375	1516	551	1934	2492	2623
transcript_14166	gnl|BL_ORD_ID|18042 transcript_3319	677	1735	7	677	1719	2777	2	672
transcript_98280	gnl|BL_ORD_ID|81130 transcript_144784	1	1004	1000	1585	2134	3137	3653	4239
transcript_129263	gnl|BL_ORD_ID|81041 transcript_144625	1	1299	1297	1984	443	1742	2025	2712
transcript_91285	gnl|BL_ORD_ID|43480 transcript_6191	1	1652	1652	2210	1	1652	1835	2397
transcript_93136	gnl|BL_ORD_ID|24802 transcript_56111	1	1379	1379	1725	84	1479	1691	2036
transcript_284	gnl|BL_ORD_ID|47489 transcript_91441	134	3198	3194	4161	2	3066	3344	4313
transcript_119425	gnl|BL_ORD_ID|30893 transcript_5068	1	1358	1354	2187	2	1358	1675	2508
transcript_75305	gnl|BL_ORD_ID|246 transcript_389	1	2390	2387	3844	2	2391	2550	4007
transcript_77240	gnl|BL_ORD_ID|69103 transcript_9142	542	1872	8	545	676	2019	32	569
transcript_106381	gnl|BL_ORD_ID|34666 transcript_71413	1	1109	1110	1519	634	1738	3079	3488
transcript_121562	gnl|BL_ORD_ID|55158 transcript_104077	111	2788	2790	2926	2	2679	2878	3017
transcript_79692	gnl|BL_ORD_ID|7805 transcript_1498	1	1746	1745	1976	1093	2838	2998	3229
transcript_39022	gnl|BL_ORD_ID|46309 transcript_89496	131	1581	1	132	1812	3260	1575	1706
transcript_85448	gnl|BL_ORD_ID|64378 transcript_118281	225	2512	1	225	1445	3733	1	225
transcript_91187	gnl|BL_ORD_ID|17791 transcript_2827	169	1342	3	174	1437	2606	8	180
transcript_142318	gnl|BL_ORD_ID|50944 transcript_97098	1	1059	1055	1566	1	1078	1194	1699
transcript_40826	gnl|BL_ORD_ID|30768 transcript_4836	1	1952	1950	2384	2	1954	2108	2542
transcript_128718	gnl|BL_ORD_ID|41358 transcript_82464	1	1095	1093	1638	2	1096	1248	1795
transcript_84620	gnl|BL_ORD_ID|19788 transcript_47774	1	3884	3885	4173	1	3883	4013	4301
transcript_71821	gnl|BL_ORD_ID|44820 transcript_87065	1	1069	1069	1188	1854	2925	3075	3186
transcript_10712	gnl|BL_ORD_ID|61790 transcript_114001	1	1623	1618	1984	45	1667	2024	2390
transcript_109871	gnl|BL_ORD_ID|15626 transcript_41963	329	1936	52	332	655	2262	116	396
transcript_91061	gnl|BL_ORD_ID|84971 transcript_106805	1025	3127	1	1027	1602	3706	11	1045
transcript_39249	gnl|BL_ORD_ID|28225 transcript_61876	2	2031	2028	2536	1	2030	2132	2640
transcript_1553	gnl|BL_ORD_ID|69922 transcript_126326	375	3271	62	379	858	3758	2	319
transcript_110937	gnl|BL_ORD_ID|47933 transcript_92175	140	2150	1	140	1857	3862	1565	1703
transcript_145025	gnl|BL_ORD_ID|17791 transcript_2827	174	1556	2	178	1465	2847	1	177
transcript_13279	gnl|BL_ORD_ID|114 transcript_184	173	1878	1	178	2783	4467	1	181
transcript_126867	gnl|BL_ORD_ID|58434 transcript_108365	487	1064	8	489	728	1305	2	483
transcript_284	gnl|BL_ORD_ID|141 transcript_220	225	4161	17	227	415	4353	1	211
transcript_18074	gnl|BL_ORD_ID|30780 transcript_4869	201	1556	4	204	1183	2538	1	201
transcript_91280	gnl|BL_ORD_ID|23426 transcript_53874	287	1197	33	287	380	1290	3	257
transcript_112543	gnl|BL_ORD_ID|19393 transcript_47110	1	1794	1792	2202	4	1802	2048	2458
transcript_22540	gnl|BL_ORD_ID|31739 transcript_66462	308	1176	8	303	1082	1946	2	297
transcript_42295	gnl|BL_ORD_ID|65164 transcript_119535	1	1523	1524	2299	1	1526	1630	2388
transcript_11793	gnl|BL_ORD_ID|114 transcript_184	259	1939	85	264	2783	4464	2	181
transcript_121734	gnl|BL_ORD_ID|32206 transcript_67270	1	1776	1771	2243	68	1843	4077	4549
transcript_121453	gnl|BL_ORD_ID|30620 transcript_4563	504	2417	63	506	669	2581	2	445
transcript_16313	gnl|BL_ORD_ID|78518 transcript_140539	324	1702	43	323	525	1908	132	412
transcript_126388	gnl|BL_ORD_ID|58300 transcript_108144	1208	3411	1	1208	3702	5903	2174	3376
transcript_22577	gnl|BL_ORD_ID|74733 transcript_134324	123	1183	16	122	222	1271	1	107
transcript_2621	gnl|BL_ORD_ID|652 transcript_1124	116	2919	1	116	571	3368	1	115
transcript_40967	gnl|BL_ORD_ID|66961 transcript_122475	12	3168	3172	3586	2	3177	3315	3731
transcript_60630	gnl|BL_ORD_ID|27651 transcript_60908	1	1159	1156	1631	4	1165	1403	1878
transcript_129970	gnl|BL_ORD_ID|2081 transcript_16696	1	1115	1114	1410	136	1267	1373	1671
transcript_127397	gnl|BL_ORD_ID|16469 transcript_43330	1	1058	1055	1869	3	1064	1234	2047
transcript_69778	gnl|BL_ORD_ID|78655 transcript_140738	174	1740	6	175	1436	2982	535	701
transcript_93232	gnl|BL_ORD_ID|37267 transcript_75800	1	2440	2439	2680	48	2481	2675	2915
transcript_134897	gnl|BL_ORD_ID|26372 transcript_58708	126	2801	2802	4414	2	2677	2851	4463
transcript_74099	gnl|BL_ORD_ID|17069 transcript_44371	265	2298	33	265	719	2737	22	254
transcript_96176	gnl|BL_ORD_ID|231 transcript_362	1	1688	1686	2061	1838	3525	3669	4036
transcript_21006	gnl|BL_ORD_ID|56150 transcript_7187	108	1294	1	109	1101	2285	59	167
transcript_67967	gnl|BL_ORD_ID|79788 transcript_142569	1	1876	1877	2078	1	1866	1676	1894
transcript_141362	gnl|BL_ORD_ID|47489 transcript_91441	106	2313	2309	3238	859	3066	3344	4276
transcript_136235	gnl|BL_ORD_ID|407 transcript_685	1	1752	1751	2833	342	2090	2623	3703
transcript_21003	gnl|BL_ORD_ID|30780 transcript_4869	202	1319	5	207	1423	2540	1	202
transcript_92615	gnl|BL_ORD_ID|64238 transcript_118059	1	1593	1592	2043	1	1592	2336	2787
transcript_53140	gnl|BL_ORD_ID|61477 transcript_113492	161	1510	4	160	1780	3129	2	158
transcript_83136	gnl|BL_ORD_ID|41152 transcript_82098	1	1202	1201	1876	829	2030	2276	2949
transcript_65147	gnl|BL_ORD_ID|20386 transcript_48774	1	1990	1990	2207	2	1991	2133	2350
transcript_116027	gnl|BL_ORD_ID|60519 transcript_111835	1	1015	1014	1523	251	1264	1545	2048
transcript_125017	gnl|BL_ORD_ID|48873 transcript_93713	321	3385	1	320	467	3530	7	326
transcript_1915	gnl|BL_ORD_ID|26479 transcript_58890	468	3042	8	467	621	3186	1	463
transcript_93821	gnl|BL_ORD_ID|34969 transcript_71903	1076	2093	1	1076	1733	2749	216	1271
transcript_139498	gnl|BL_ORD_ID|30902 transcript_5087	221	1636	56	226	1066	2486	2	172
transcript_76453	gnl|BL_ORD_ID|11064 transcript_34198	1	1320	1318	2176	1	1316	1448	2303
transcript_73068	gnl|BL_ORD_ID|4881 transcript_22324	299	1006	30	300	445	1161	64	334
transcript_142342	gnl|BL_ORD_ID|61150 transcript_112922	1	1284	1281	2016	4	1287	2458	3193
transcript_122473	gnl|BL_ORD_ID|314 transcript_507	1	2802	2801	3434	1	2802	3227	3860
transcript_4836	gnl|BL_ORD_ID|84755 transcript_93392	13	1954	1952	2542	2	1937	2686	3278
transcript_136066	gnl|BL_ORD_ID|53925 transcript_102006	1020	2415	1	1020	1142	2533	1	1020
transcript_135138	gnl|BL_ORD_ID|17516 transcript_45114	1	2714	2718	3159	185	2884	3000	3430
transcript_120593	gnl|BL_ORD_ID|73987 transcript_132992	391	2065	4	391	507	2177	1	389
transcript_83441	gnl|BL_ORD_ID|17498 transcript_45080	103	2682	2683	3117	3	2600	3256	3692
transcript_37140	gnl|BL_ORD_ID|24128 transcript_55002	420	1181	5	420	1179	1955	112	527
transcript_82671	gnl|BL_ORD_ID|57037 transcript_105990	31	3914	3912	5148	1	3859	3964	5196
transcript_14320	gnl|BL_ORD_ID|44307 transcript_86253	207	1815	41	206	339	1936	2	168
transcript_54005	gnl|BL_ORD_ID|24018 transcript_54806	3	3037	3034	3288	134	3157	3451	3707
transcript_92182	gnl|BL_ORD_ID|16633 transcript_43626	1210	2498	1	1211	1733	3014	24	1231
transcript_18366	gnl|BL_ORD_ID|14248 transcript_39636	229	1540	9	228	323	1634	2	221
transcript_66430	gnl|BL_ORD_ID|85110 transcript_116473	121	2382	1	124	421	2695	163	286
transcript_103987	gnl|BL_ORD_ID|46121 transcript_89183	1	1149	1145	1485	9	1157	1635	1981
transcript_112737	gnl|BL_ORD_ID|24018 transcript_54806	11	3131	3128	3383	1	3157	3451	3707
transcript_78937	gnl|BL_ORD_ID|80048 transcript_143012	1	3370	3369	3806	191	3539	3720	4158
transcript_17471	gnl|BL_ORD_ID|44900 transcript_87188	285	1613	53	284	348	1677	2	233
transcript_132566	gnl|BL_ORD_ID|7949 transcript_1767	138	1156	2	139	2092	3110	82	219
transcript_119642	gnl|BL_ORD_ID|21588 transcript_50832	1	1745	1744	2563	1133	2877	3022	3842
transcript_21709	gnl|BL_ORD_ID|33080 transcript_68733	305	1248	9	306	693	1636	5	302
transcript_72933	gnl|BL_ORD_ID|76199 transcript_136748	1	1896	1895	2318	326	2219	2615	3038
transcript_85465	gnl|BL_ORD_ID|23744 transcript_54355	300	3290	2	299	804	3794	74	371
transcript_121991	gnl|BL_ORD_ID|20782 transcript_49437	302	1075	5	307	419	1192	2	311
transcript_43113	gnl|BL_ORD_ID|49565 transcript_94831	153	1127	2	155	1103	2079	84	237
transcript_137306	gnl|BL_ORD_ID|58923 transcript_109158	1	1410	1409	1712	1239	2648	2748	3052
transcript_145032	gnl|BL_ORD_ID|73522 transcript_132235	1	1772	1772	2859	103	1875	1980	3067
transcript_23416	gnl|BL_ORD_ID|13887 transcript_38998	176	1096	2	174	581	1528	13	185
transcript_73533	gnl|BL_ORD_ID|16507 transcript_43406	1056	2523	1	1057	2233	3701	939	1997
transcript_111682	gnl|BL_ORD_ID|64607 transcript_118638	1	2488	2487	3038	333	2828	4786	5341
transcript_5384	gnl|BL_ORD_ID|30961 transcript_5197	1	2095	2090	2421	1	2091	2202	2532
transcript_78819	gnl|BL_ORD_ID|51755 transcript_98411	187	1385	3	188	477	1659	118	301
transcript_140486	gnl|BL_ORD_ID|8176 transcript_2177	2	2118	2117	2888	17	2165	2284	3057
transcript_7450	gnl|BL_ORD_ID|77181 transcript_138348	1	1245	1245	2267	1	1245	1443	2466
transcript_58894	gnl|BL_ORD_ID|51762 transcript_98419	2	2144	2142	2358	24	2145	2322	2532
transcript_63945	gnl|BL_ORD_ID|22974 transcript_53120	1	2291	2289	2681	345	2627	2816	3210
transcript_91262	gnl|BL_ORD_ID|82707 transcript_11749	129	1699	1	132	259	1829	1	132
transcript_96908	gnl|BL_ORD_ID|10917 transcript_33962	1	1045	1046	2019	360	1399	2027	3001
transcript_144714	gnl|BL_ORD_ID|14312 transcript_39750	1	1591	1590	2394	698	2288	2696	3500
transcript_134640	gnl|BL_ORD_ID|85452 transcript_138566	358	2091	5	360	1581	3314	471	826
transcript_43935	gnl|BL_ORD_ID|25286 transcript_56898	1	1197	1198	2214	2	1198	1329	2345
transcript_51004	gnl|BL_ORD_ID|23998 transcript_54775	1	1728	1727	2160	21	1748	2444	2877
transcript_35199	gnl|BL_ORD_ID|48589 transcript_93272	147	1359	2	149	539	1749	30	177
transcript_41873	gnl|BL_ORD_ID|55885 transcript_105270	1	1606	1605	2049	1079	2682	3842	4286
transcript_142213	gnl|BL_ORD_ID|55577 transcript_104784	1	1091	1091	1829	269	1365	1529	2269
transcript_13423	gnl|BL_ORD_ID|41683 transcript_83013	209	1868	48	210	717	2372	1	162
transcript_16067	gnl|BL_ORD_ID|13698 transcript_38654	171	1688	67	171	1961	3480	3	108
transcript_54863	gnl|BL_ORD_ID|62857 transcript_115774	183	1715	65	182	1089	2621	565	682
transcript_40370	gnl|BL_ORD_ID|38893 transcript_78456	183	3501	18	185	1040	4349	2	170
transcript_37690	gnl|BL_ORD_ID|33114 transcript_68787	117	1427	1	118	226	1518	1	117
transcript_115312	gnl|BL_ORD_ID|57885 transcript_107449	12	1751	1750	1981	12	1781	2029	2260
transcript_22451	gnl|BL_ORD_ID|4044 transcript_20705	1	1054	1053	1173	52	1105	1229	1347
transcript_111404	gnl|BL_ORD_ID|26755 transcript_59374	1182	2978	1	1187	2445	4240	897	2082
transcript_122616	gnl|BL_ORD_ID|8473 transcript_2681	1	1909	1907	2441	346	2253	2355	2889
transcript_34520	gnl|BL_ORD_ID|8248 transcript_2295	2	2516	2517	2708	110	2598	2722	2913
transcript_79668	gnl|BL_ORD_ID|36406 transcript_74335	121	1590	1	124	1055	2524	591	714
transcript_80779	gnl|BL_ORD_ID|39987 transcript_80173	547	2015	57	552	604	2098	2	496
transcript_122623	gnl|BL_ORD_ID|85004 transcript_109034	1	2140	2139	3900	59	2197	2429	4190
transcript_3381	gnl|BL_ORD_ID|42545 transcript_84479	273	2743	6	275	1679	4149	2	271
transcript_22932	gnl|BL_ORD_ID|52775 transcript_100092	292	1134	7	294	2612	3456	1	289
transcript_62520	gnl|BL_ORD_ID|19788 transcript_47774	1	2382	2383	2671	1502	3883	4013	4301
transcript_76366	gnl|BL_ORD_ID|29213 transcript_63532	1	2066	2067	2425	1720	3787	4205	4562
transcript_49858	gnl|BL_ORD_ID|25306 transcript_56935	458	1377	47	459	1142	2087	2	414
transcript_11394	gnl|BL_ORD_ID|17238 transcript_44635	699	1988	72	703	1610	2900	2	633
transcript_40383	gnl|BL_ORD_ID|13672 transcript_38613	1	1394	1395	2190	1	1394	1654	2449
transcript_144018	gnl|BL_ORD_ID|29839 transcript_64571	354	3618	1	354	479	3766	1	354
transcript_237	gnl|BL_ORD_ID|28582 transcript_62473	2	2390	2388	4067	4	2392	2577	4256
transcript_107163	gnl|BL_ORD_ID|42857 transcript_84992	1	1427	1425	2645	4	1430	1891	3105
transcript_90874	gnl|BL_ORD_ID|164 transcript_257	304	3866	2	305	662	4203	42	345
transcript_3130	gnl|BL_ORD_ID|67827 transcript_123987	2	2471	2468	2806	1	2474	3386	3724
transcript_81769	gnl|BL_ORD_ID|34223 transcript_70677	1	1390	1389	1934	228	1617	2843	3388
transcript_143778	gnl|BL_ORD_ID|8014 transcript_1887	500	3029	52	501	620	3150	1	448
transcript_54423	gnl|BL_ORD_ID|73360 transcript_131947	1	1631	1630	1991	1218	2848	3029	3390
transcript_99200	gnl|BL_ORD_ID|58149 transcript_107901	1366	3273	1	1365	2213	4116	62	1431
transcript_45196	gnl|BL_ORD_ID|16149 transcript_42817	221	1408	4	222	665	1842	285	503
transcript_131988	gnl|BL_ORD_ID|40049 transcript_80268	1	1741	1736	2131	12	1752	1965	2360
transcript_82433	gnl|BL_ORD_ID|13328 transcript_38012	390	4256	2	392	787	4662	63	448
transcript_61326	gnl|BL_ORD_ID|11772 transcript_35436	1	1142	1142	1761	2	1143	1828	2447
transcript_4609	gnl|BL_ORD_ID|60051 transcript_111067	223	2571	2	226	1266	3613	53	277
transcript_70734	gnl|BL_ORD_ID|73690 transcript_132506	1075	2168	1	1080	2286	3378	941	2021
transcript_127839	gnl|BL_ORD_ID|27107 transcript_59985	1463	3525	1	1468	2424	4488	104	1569
transcript_4474	gnl|BL_ORD_ID|70205 transcript_126775	106	1778	1779	2587	2	1689	1956	2764
transcript_64706	gnl|BL_ORD_ID|12044 transcript_35861	1	2898	2896	4924	356	3253	3557	5592
transcript_72438	gnl|BL_ORD_ID|386 transcript_650	1	1716	1714	2431	1125	2839	2996	3713
transcript_12915	gnl|BL_ORD_ID|54255 transcript_102581	11	1130	1125	1866	2	1122	1333	2075
transcript_104537	gnl|BL_ORD_ID|17106 transcript_44429	1	3009	3009	3419	7	3007	4566	4974
transcript_96555	gnl|BL_ORD_ID|41609 transcript_82881	1479	3236	1	1478	2046	3820	217	1703
transcript_40663	gnl|BL_ORD_ID|7950 transcript_1769	1	1967	1968	2915	171	2151	2259	3206
transcript_75846	gnl|BL_ORD_ID|43212 transcript_5651	1	1318	1318	1593	723	2039	2209	2484
transcript_65476	gnl|BL_ORD_ID|40465 transcript_80936	1	2219	2215	2375	1137	3362	3508	3666
transcript_143306	gnl|BL_ORD_ID|11181 transcript_34410	1	1349	1348	1918	297	1645	1758	2328
transcript_39022	gnl|BL_ORD_ID|41796 transcript_83221	131	1581	1	132	1822	3272	1585	1716
transcript_128655	gnl|BL_ORD_ID|63494 transcript_116795	1	1697	1698	2077	392	2088	2192	2576
transcript_46731	gnl|BL_ORD_ID|60496 transcript_111799	1	1569	1564	2231	198	1773	1981	2621
transcript_38691	gnl|BL_ORD_ID|38628 transcript_78021	319	2274	83	320	705	2660	1	239
transcript_112681	gnl|BL_ORD_ID|71075 transcript_128183	146	1208	2	147	371	1432	99	244
transcript_47825	gnl|BL_ORD_ID|25360 transcript_57003	2	4138	4137	4925	10	4121	4234	5012
transcript_141804	gnl|BL_ORD_ID|59047 transcript_109372	12	1565	1564	2189	294	1824	1970	2595
transcript_54640	gnl|BL_ORD_ID|75250 transcript_135170	1	1210	1208	1825	8	1216	1321	1938
transcript_35887	gnl|BL_ORD_ID|76172 transcript_136699	250	3238	2	255	558	3553	1	255
transcript_43448	gnl|BL_ORD_ID|29846 transcript_64579	1	2224	2223	3264	235	2457	2561	3607
transcript_95901	gnl|BL_ORD_ID|60224 transcript_111346	135	1121	2	136	385	1371	114	245
transcript_47378	gnl|BL_ORD_ID|52647 transcript_99875	1	1315	1313	1901	1	1315	1498	2086
transcript_73538	gnl|BL_ORD_ID|16657 transcript_43675	9	822	822	1030	9	822	941	1160
transcript_70645	gnl|BL_ORD_ID|43543 transcript_6322	101	1705	1704	2378	4	1607	1727	2401
transcript_128239	gnl|BL_ORD_ID|61991 transcript_114327	1	1096	1093	1554	423	1517	1947	2408
transcript_9233	gnl|BL_ORD_ID|26180 transcript_58358	202	2100	2	204	438	2345	32	234
transcript_59469	gnl|BL_ORD_ID|17205 transcript_44573	1	1544	1544	2429	501	2044	2818	3703
transcript_18666	gnl|BL_ORD_ID|37010 transcript_75395	275	1494	4	275	401	1617	9	277
transcript_135080	gnl|BL_ORD_ID|26561 transcript_59026	1	1659	1659	2350	1065	2722	3207	3898
transcript_141854	gnl|BL_ORD_ID|30182 transcript_65132	349	1722	43	349	531	1904	2	308
transcript_68270	gnl|BL_ORD_ID|51831 transcript_98528	1	1836	1837	2357	55	1891	2545	3065
transcript_8513	gnl|BL_ORD_ID|80 transcript_120	149	2154	1	149	2770	4773	1	149
transcript_92503	gnl|BL_ORD_ID|39449 transcript_79313	1323	4191	10	1328	1484	4348	39	1382
transcript_87917	gnl|BL_ORD_ID|28564 transcript_62441	115	1622	10	115	369	1868	1	105
transcript_18583	gnl|BL_ORD_ID|1441 transcript_15336	1	1283	1282	1513	11	1293	1444	1675
transcript_78043	gnl|BL_ORD_ID|58135 transcript_107881	1	1244	1245	1857	15	1258	1484	2095
transcript_129961	gnl|BL_ORD_ID|71330 transcript_128590	243	2361	36	245	698	2800	2	213
transcript_139708	gnl|BL_ORD_ID|41985 transcript_83535	1	1072	1070	2045	668	1758	2075	3050
transcript_9696	gnl|BL_ORD_ID|55265 transcript_104271	1015	2112	1	1015	2059	3172	1	1015
transcript_142306	gnl|BL_ORD_ID|77630 transcript_139070	149	1382	2	149	1005	2238	3	150
transcript_10031	gnl|BL_ORD_ID|71284 transcript_128511	1	1157	1155	2093	1	1161	1268	2214
transcript_119192	gnl|BL_ORD_ID|37598 transcript_76343	220	3394	1	222	759	3931	388	608
transcript_22120	gnl|BL_ORD_ID|2214 transcript_16945	338	1237	5	340	773	1670	33	370
transcript_7407	gnl|BL_ORD_ID|18296 transcript_3846	134	2222	11	135	595	2683	2	126
transcript_5734	gnl|BL_ORD_ID|8211 transcript_2234	1	1857	1856	2441	1	1857	2426	3011
transcript_107451	gnl|BL_ORD_ID|13664 transcript_38597	1	1920	1921	2361	19	1933	2147	2587
transcript_143127	gnl|BL_ORD_ID|20573 transcript_49096	122	1691	1	125	2099	3669	1642	1766
transcript_44680	gnl|BL_ORD_ID|74913 transcript_134620	1	2993	2991	3874	1610	4629	5269	6152
transcript_61734	gnl|BL_ORD_ID|55279 transcript_104297	1	1529	1524	1641	2	1533	1677	1794
transcript_127001	gnl|BL_ORD_ID|16325 transcript_43101	353	1093	51	355	428	1169	1	304
transcript_70776	gnl|BL_ORD_ID|32699 transcript_68088	184	1992	1	186	913	2703	327	512
transcript_75509	gnl|BL_ORD_ID|18424 transcript_4116	2	2077	2077	2337	8	2083	2371	2631
transcript_10928	gnl|BL_ORD_ID|24526 transcript_55650	1	1253	1252	2019	1	1253	1386	2153
transcript_1694	gnl|BL_ORD_ID|35017 transcript_71993	1	1941	1938	3110	1	1944	2401	3574
transcript_127318	gnl|BL_ORD_ID|77770 transcript_139329	1185	2649	1	1186	1313	2825	2	1186
transcript_58708	gnl|BL_ORD_ID|36169 transcript_73932	2	2850	2849	4462	142	3001	3106	4728
transcript_3597	gnl|BL_ORD_ID|23384 transcript_53803	639	2742	77	643	955	3057	2	568
transcript_121869	gnl|BL_ORD_ID|53259 transcript_100905	1	2677	2675	3683	37	2728	3031	4037
transcript_94586	gnl|BL_ORD_ID|16275 transcript_43023	1	2048	2047	2800	382	2429	2565	3308
transcript_38487	gnl|BL_ORD_ID|84367 transcript_70378	13	1427	1426	1739	1	1415	3002	3316
transcript_14238	gnl|BL_ORD_ID|81469 transcript_145334	191	1813	4	193	1531	3144	1	189
transcript_136975	gnl|BL_ORD_ID|27462 transcript_60588	1	1719	1718	2956	523	2236	2397	3635
transcript_93970	gnl|BL_ORD_ID|72131 transcript_129933	1568	4137	1	1568	2193	4759	448	2015
transcript_40885	gnl|BL_ORD_ID|37949 transcript_76904	492	2044	64	494	5106	6666	1	430
transcript_107630	gnl|BL_ORD_ID|80048 transcript_143012	1	2334	2333	2796	1205	3539	3720	4187
transcript_119856	gnl|BL_ORD_ID|49961 transcript_95462	143	1479	1	145	278	1644	25	172
transcript_125130	gnl|BL_ORD_ID|85194 transcript_122011	235	2838	1	235	502	3105	1	236
transcript_103143	gnl|BL_ORD_ID|31547 transcript_66130	1	2211	2210	3796	4191	6400	7469	9056
transcript_108844	gnl|BL_ORD_ID|63255 transcript_116395	200	2564	18	200	293	2657	2	184
transcript_4721	gnl|BL_ORD_ID|344 transcript_566	479	2562	69	480	1712	3795	1	412
transcript_101437	gnl|BL_ORD_ID|67265 transcript_123016	1	1645	1642	1815	1	1661	1828	2001
transcript_6004	gnl|BL_ORD_ID|39875 transcript_79995	10	1512	1509	2387	892	2394	2589	3467
transcript_101675	gnl|BL_ORD_ID|16978 transcript_44231	169	1529	27	171	543	1906	1	145
transcript_82373	gnl|BL_ORD_ID|74391 transcript_133731	206	1482	47	209	555	1836	2	167
transcript_142572	gnl|BL_ORD_ID|21415 transcript_50526	1	1243	1243	2460	1288	2530	3018	4236
transcript_44213	gnl|BL_ORD_ID|23673 transcript_54244	1	1937	1936	2187	1927	3861	4046	4291
transcript_127551	gnl|BL_ORD_ID|55870 transcript_105248	995	2421	1	1000	1664	3090	545	1544
transcript_96945	gnl|BL_ORD_ID|14493 transcript_40045	1	1295	1293	1554	1	1292	1643	1904
transcript_52227	gnl|BL_ORD_ID|192 transcript_298	11	2656	2655	2845	2	2648	2799	2989
transcript_4004	gnl|BL_ORD_ID|75286 transcript_135224	15	1573	1574	2533	3	1587	1687	2654
transcript_60952	gnl|BL_ORD_ID|62478 transcript_115130	1	1120	1121	1692	531	1650	1836	2405
transcript_98818	gnl|BL_ORD_ID|77223 transcript_138415	1	1067	1064	2118	10	1072	1191	2243
transcript_116102	gnl|BL_ORD_ID|42825 transcript_84938	1	3184	3183	3493	2219	5399	5518	5827
transcript_45838	gnl|BL_ORD_ID|19821 transcript_47825	258	4749	12	257	434	4939	2	242
transcript_107359	gnl|BL_ORD_ID|15275 transcript_41387	1087	3295	1	1089	1381	3575	159	1249
transcript_10712	gnl|BL_ORD_ID|23799 transcript_54450	1	1620	1618	2024	1	1619	1787	2193
transcript_7365	gnl|BL_ORD_ID|16868 transcript_44041	347	2228	5	347	1037	2902	1	326
transcript_21710	gnl|BL_ORD_ID|13887 transcript_38998	228	1226	45	231	579	1575	2	188
transcript_139102	gnl|BL_ORD_ID|8364 transcript_2491	1	1752	1749	2618	1	1752	1868	2737
transcript_14326	gnl|BL_ORD_ID|83136 transcript_12596	158	1821	1	158	285	1915	2	163
transcript_139534	gnl|BL_ORD_ID|18131 transcript_3483	1	1762	1757	2567	1	1762	1945	2753
transcript_12510	gnl|BL_ORD_ID|68876 transcript_8719	1	1727	1722	1923	1	1727	1959	2160
transcript_101091	gnl|BL_ORD_ID|60066 transcript_111089	112	2363	1	111	209	2460	1	109
transcript_83136	gnl|BL_ORD_ID|28615 transcript_62536	1	1202	1201	1892	680	1886	2132	2826
transcript_105720	gnl|BL_ORD_ID|76591 transcript_137417	1285	4496	1	1284	1428	4620	1	1283
transcript_503	gnl|BL_ORD_ID|73558 transcript_132291	2	2386	2381	3677	1	2386	2712	4008
transcript_13525	gnl|BL_ORD_ID|20455 transcript_48893	1	1015	1014	1848	512	1521	2070	2903
transcript_13279	gnl|BL_ORD_ID|57184 transcript_106245	173	1880	1	178	2771	4457	1	181
transcript_45442	gnl|BL_ORD_ID|41698 transcript_83042	149	1720	1	148	415	1985	128	275
transcript_17586	gnl|BL_ORD_ID|44900 transcript_87188	239	1607	7	238	348	1717	2	233
transcript_72635	gnl|BL_ORD_ID|372 transcript_623	1	2140	2140	3621	14	2153	2276	3756
transcript_127749	gnl|BL_ORD_ID|67852 transcript_124025	1	1235	1235	1642	1	1234	1346	1752
transcript_78876	gnl|BL_ORD_ID|26180 transcript_58358	136	2031	1	141	439	2343	33	171
transcript_2188	gnl|BL_ORD_ID|76557 transcript_137360	2	2329	2329	2921	89	2416	3028	3620
transcript_104132	gnl|BL_ORD_ID|10852 transcript_33853	1	2005	2003	2302	77	2081	2413	2712
transcript_122296	gnl|BL_ORD_ID|19973 transcript_48095	1483	3006	1	1488	2319	3838	1	1482
transcript_47563	gnl|BL_ORD_ID|8148 transcript_2135	394	2649	8	396	785	3038	49	438
transcript_2127	gnl|BL_ORD_ID|35209 transcript_72315	2	2620	2620	2993	1	2619	2811	3183
transcript_100273	gnl|BL_ORD_ID|23731 transcript_54331	119	2229	1	121	371	2483	53	173
transcript_143412	gnl|BL_ORD_ID|51747 transcript_98399	1	2473	2472	3222	3	2466	2594	3370
transcript_86245	gnl|BL_ORD_ID|63011 transcript_116025	235	4111	1	240	709	4610	62	301
transcript_48094	gnl|BL_ORD_ID|65123 transcript_119462	1	1443	1444	1692	1160	2603	3779	4029
transcript_39022	gnl|BL_ORD_ID|50318 transcript_96021	131	1581	1	132	989	2438	751	883
transcript_5540	gnl|BL_ORD_ID|71330 transcript_128590	171	2414	1	173	698	2941	39	213
transcript_120389	gnl|BL_ORD_ID|50546 transcript_96411	1	1248	1243	1512	1	1248	2223	2492
transcript_84681	gnl|BL_ORD_ID|26611 transcript_59112	1	2686	2685	2825	2	2686	2796	2936
transcript_107615	gnl|BL_ORD_ID|37975 transcript_76950	1	3120	3119	3428	1166	4281	4387	4698
transcript_49264	gnl|BL_ORD_ID|37491 transcript_76173	1	1087	1087	1196	385	1471	1681	1790
transcript_78937	gnl|BL_ORD_ID|49799 transcript_95194	1	3370	3369	3805	212	3560	3685	4119
transcript_55024	gnl|BL_ORD_ID|56911 transcript_105787	1	1251	1250	1400	1	1248	2354	2504
transcript_88309	gnl|BL_ORD_ID|29115 transcript_63359	1	1256	1257	2111	2	1282	1388	2229
transcript_83165	gnl|BL_ORD_ID|1963 transcript_16451	185	1455	2	184	380	1649	7	189
transcript_54094	gnl|BL_ORD_ID|276 transcript_442	229	3174	1	230	1001	3934	4	232
transcript_58582	gnl|BL_ORD_ID|15707 transcript_42095	132	1082	2	134	2243	3193	110	244
transcript_33665	gnl|BL_ORD_ID|53640 transcript_101567	1	1419	1417	1872	10	1444	1724	2179
transcript_76086	gnl|BL_ORD_ID|106 transcript_174	1621	4399	13	1622	1736	4540	10	1619
transcript_108527	gnl|BL_ORD_ID|271 transcript_434	1723	3714	1	1726	1873	3865	2	1728
transcript_17672	gnl|BL_ORD_ID|13812 transcript_38848	190	1588	26	191	486	1884	2	167
transcript_127551	gnl|BL_ORD_ID|8061 transcript_1961	995	2421	1	1000	1618	3028	499	1498
transcript_104174	gnl|BL_ORD_ID|63781 transcript_117291	428	1973	99	429	1126	2670	63	393
transcript_15776	gnl|BL_ORD_ID|17676 transcript_45373	257	1703	33	257	895	2345	1	222
transcript_135557	gnl|BL_ORD_ID|72238 transcript_130100	1	3090	3094	4612	265	3351	4092	5592
transcript_109222	gnl|BL_ORD_ID|47362 transcript_91232	1	2983	2981	3632	676	3662	4933	5585
transcript_93300	gnl|BL_ORD_ID|54681 transcript_103290	1	1762	1761	2465	35	1769	1943	2658
transcript_127878	gnl|BL_ORD_ID|408 transcript_686	1	1739	1737	1957	1468	3205	3478	3698
transcript_7952	gnl|BL_ORD_ID|12949 transcript_37369	471	2236	7	474	1899	3670	2	469
transcript_10728	gnl|BL_ORD_ID|43463 transcript_6169	1	1783	1778	2051	1	1811	1970	2239
transcript_69551	gnl|BL_ORD_ID|34393 transcript_70957	1	1053	1051	1335	191	1242	1773	2057
transcript_63270	gnl|BL_ORD_ID|41810 transcript_83254	1	2396	2396	2557	103	2493	2640	2801
transcript_117215	gnl|BL_ORD_ID|35874 transcript_73435	772	2060	9	776	914	2228	2	771
transcript_85467	gnl|BL_ORD_ID|10701 transcript_33631	299	1837	49	302	1201	2739	2	255
transcript_122809	gnl|BL_ORD_ID|56130 transcript_7152	1	1705	1701	1999	2	1707	1933	2220
transcript_2270	gnl|BL_ORD_ID|8169 transcript_2168	1	2442	2443	2897	1	2442	2552	3006
transcript_1133	gnl|BL_ORD_ID|11374 transcript_34763	258	3413	2	259	855	4010	4	261
transcript_111466	gnl|BL_ORD_ID|62254 transcript_114753	1	1237	1236	2012	64	1300	1415	2191
transcript_39506	gnl|BL_ORD_ID|15232 transcript_41315	1	2803	2801	3023	2	2805	2951	3173
transcript_65500	gnl|BL_ORD_ID|77340 transcript_138610	191	1060	2	192	658	1527	10	200
transcript_261	gnl|BL_ORD_ID|24897 transcript_56264	1584	4071	1	1586	1765	4233	2	1580
transcript_4690	gnl|BL_ORD_ID|61593 transcript_113675	1156	2547	1	1156	1269	2660	1	1156
transcript_115116	gnl|BL_ORD_ID|68206 transcript_124636	285	1598	4	285	1722	3032	976	1256
transcript_35608	gnl|BL_ORD_ID|55323 transcript_104373	1226	3604	1	1228	2096	4492	758	1993
transcript_71208	gnl|BL_ORD_ID|79938 transcript_142826	1	1553	1554	1902	2	1560	1738	2088
transcript_63400	gnl|BL_ORD_ID|7949 transcript_1767	243	1241	26	244	2092	3090	1	219
transcript_16329	gnl|BL_ORD_ID|81793 transcript_10212	1	1134	1135	1690	51	1181	1453	2008
transcript_127084	gnl|BL_ORD_ID|54681 transcript_103290	1	1622	1621	2474	145	1769	1943	2792
transcript_128947	gnl|BL_ORD_ID|81128 transcript_144779	1	1757	1758	2464	656	2412	3000	3732
transcript_48072	gnl|BL_ORD_ID|75897 transcript_136253	134	2613	1	138	1007	3509	3	142
transcript_142996	gnl|BL_ORD_ID|11484 transcript_34962	1	1415	1413	1778	723	2135	2362	2726
transcript_92397	gnl|BL_ORD_ID|34859 transcript_71705	1	1329	1327	1715	678	2005	2109	2520
transcript_133544	gnl|BL_ORD_ID|74 transcript_108	1	3730	3728	4618	1	3725	3933	4823
transcript_106317	gnl|BL_ORD_ID|11013 transcript_34112	12	2519	2515	3061	1	2508	2633	3179
transcript_137979	gnl|BL_ORD_ID|56920 transcript_105804	311	2059	33	312	424	2145	2	281
transcript_127551	gnl|BL_ORD_ID|7847 transcript_1560	995	2421	1	1000	1609	3035	490	1489
transcript_15357	gnl|BL_ORD_ID|48875 transcript_93715	1	1157	1154	1749	2	1150	1268	1864
transcript_48352	gnl|BL_ORD_ID|74216 transcript_133432	1	1719	1717	1936	26	1761	3017	3235
transcript_103113	gnl|BL_ORD_ID|343 transcript_565	1070	2204	1	1071	2657	3791	1416	2487
transcript_8831	gnl|BL_ORD_ID|14033 transcript_39249	1	1060	1060	2092	1	1060	1587	2619
transcript_23333	gnl|BL_ORD_ID|15370 transcript_41543	164	1051	2	166	2643	3531	4	168
transcript_77171	gnl|BL_ORD_ID|12711 transcript_36987	1	1640	1640	2031	1	1640	2371	2762
transcript_61335	gnl|BL_ORD_ID|23771 transcript_54399	287	4042	2	289	717	4446	26	313
transcript_49040	gnl|BL_ORD_ID|53684 transcript_101633	157	1355	2	162	362	1560	1	160
transcript_79834	gnl|BL_ORD_ID|25882 transcript_57879	1	2458	2456	2601	1	2455	2565	2710
transcript_114965	gnl|BL_ORD_ID|23205 transcript_53509	11	1528	1529	2213	2	1519	1707	2394
transcript_120545	gnl|BL_ORD_ID|43757 transcript_6763	1	1756	1754	2150	1	1755	1920	2316
transcript_12998	gnl|BL_ORD_ID|38356 transcript_77567	684	1882	7	681	895	2094	1	675
transcript_62018	gnl|BL_ORD_ID|80763 transcript_144179	1	2158	2155	2468	3	2162	2619	2932
transcript_85488	gnl|BL_ORD_ID|58709 transcript_108803	1	1925	1922	3297	284	2208	2689	4055
transcript_131628	gnl|BL_ORD_ID|21295 transcript_50322	1	1883	1883	2143	1	1879	2027	2300
transcript_135557	gnl|BL_ORD_ID|69464 transcript_125565	1	3091	3091	4612	257	3353	4092	5618
transcript_52219	gnl|BL_ORD_ID|33388 transcript_69255	23	2692	2692	3030	1	2674	2902	3241
transcript_74323	gnl|BL_ORD_ID|77505 transcript_138868	519	2363	60	519	997	2833	2	461
transcript_15652	gnl|BL_ORD_ID|16962 transcript_44205	137	1717	1	140	525	2123	1	139
transcript_43004	gnl|BL_ORD_ID|53933 transcript_102027	1	1384	1384	1957	1	1408	1508	2082
transcript_67308	gnl|BL_ORD_ID|52999 transcript_100446	1	1803	1803	2432	477	2279	2985	3616
transcript_85093	gnl|BL_ORD_ID|44144 transcript_85970	2	4192	4188	4502	59	4255	4418	4740
transcript_132987	gnl|BL_ORD_ID|29839 transcript_64571	352	3618	1	353	500	3766	2	354
transcript_48386	gnl|BL_ORD_ID|71086 transcript_128201	1	1643	1645	2603	853	2448	3301	4241
transcript_53757	gnl|BL_ORD_ID|41095 transcript_81999	1	2209	2209	2772	15	2225	2461	3020
transcript_127822	gnl|BL_ORD_ID|71566 transcript_128995	1	1142	1140	1694	1	1148	1276	1826
transcript_10858	gnl|BL_ORD_ID|7852 transcript_1568	1	1650	1645	1855	2	1651	2999	3209
transcript_36741	gnl|BL_ORD_ID|66639 transcript_121955	1	1701	1702	2067	77	1777	1902	2267
transcript_61453	gnl|BL_ORD_ID|77335 transcript_138604	1	2086	2083	2988	1	2080	2504	3408
transcript_80659	gnl|BL_ORD_ID|43413 transcript_6048	1	1142	1147	2014	1	1142	1326	2193
transcript_75154	gnl|BL_ORD_ID|72157 transcript_129975	806	3840	9	807	992	4028	5	806
transcript_84529	gnl|BL_ORD_ID|61123 transcript_112876	412	1264	6	416	850	1717	1	415
transcript_132506	gnl|BL_ORD_ID|34793 transcript_71614	126	3401	1	128	726	3993	1	127
transcript_59469	gnl|BL_ORD_ID|17264 transcript_44680	1	1544	1544	2455	1318	2861	2993	3904
transcript_131095	gnl|BL_ORD_ID|38355 transcript_77565	1	1818	1817	2129	512	2320	2436	2748
transcript_141804	gnl|BL_ORD_ID|18170 transcript_3560	1	1565	1564	2191	424	1964	2110	2736
transcript_73538	gnl|BL_ORD_ID|16001 transcript_42575	9	822	822	1030	9	822	941	1160
transcript_93062	gnl|BL_ORD_ID|22840 transcript_52920	436	2232	5	438	921	2722	4	430
transcript_59013	gnl|BL_ORD_ID|83792 transcript_4777	295	1760	3	299	742	2213	13	309
transcript_10513	gnl|BL_ORD_ID|56497 transcript_7870	120	2055	1	122	315	2250	1	122
transcript_107615	gnl|BL_ORD_ID|42643 transcript_84640	1	3120	3119	3398	1205	4329	4435	4715
transcript_58024	gnl|BL_ORD_ID|84073 transcript_52011	1	1322	1320	1549	2	1324	1555	1784
transcript_118502	gnl|BL_ORD_ID|24706 transcript_55953	131	1231	2	133	1383	2483	12	143
transcript_77363	gnl|BL_ORD_ID|51685 transcript_98306	387	1644	4	385	498	1753	4	380
transcript_96584	gnl|BL_ORD_ID|263 transcript_421	1258	3772	1	1257	1437	3950	28	1283
transcript_55338	gnl|BL_ORD_ID|36579 transcript_74640	274	3101	1	275	1118	3942	1	256
transcript_2171	gnl|BL_ORD_ID|78478 transcript_140479	2	2416	2416	3025	3	2417	2953	3562
transcript_49002	gnl|BL_ORD_ID|27178 transcript_60102	1	1276	1275	2185	7	1282	1471	2381
transcript_12296	gnl|BL_ORD_ID|81642 transcript_9883	407	1981	58	409	489	2081	2	353
transcript_48208	gnl|BL_ORD_ID|71066 transcript_128167	1	2083	2082	2991	200	2280	2536	3448
transcript_14172	gnl|BL_ORD_ID|85411 transcript_136052	402	1780	7	404	560	1938	2	399
transcript_78097	gnl|BL_ORD_ID|77554 transcript_138942	1	1739	1738	2977	1	1739	2150	3397
transcript_20611	gnl|BL_ORD_ID|19281 transcript_46936	426	1330	7	426	619	1523	2	421
transcript_111607	gnl|BL_ORD_ID|7937 transcript_1735	235	2964	1	236	446	3165	35	269
transcript_65403	gnl|BL_ORD_ID|51041 transcript_97254	1	1890	1888	2548	2	1888	2068	2703
transcript_53468	gnl|BL_ORD_ID|45380 transcript_87959	174	2282	1	174	331	2436	1	174
transcript_62063	gnl|BL_ORD_ID|40793 transcript_81499	1	1307	1304	1536	156	1464	1727	1959
transcript_127909	gnl|BL_ORD_ID|30837 transcript_4974	1	2029	2027	2360	1	2029	2192	2525
transcript_17099	gnl|BL_ORD_ID|77341 transcript_138611	205	1626	76	206	275	1694	2	132
transcript_22606	gnl|BL_ORD_ID|53413 transcript_101178	143	1169	24	142	262	1300	1	121
transcript_140493	gnl|BL_ORD_ID|50159 transcript_95764	1	2002	2000	2586	303	2306	2449	3033
transcript_115016	gnl|BL_ORD_ID|77683 transcript_139163	415	1548	8	417	1107	2267	47	466
transcript_86501	gnl|BL_ORD_ID|63237 transcript_116368	1	2681	2682	3393	30	2709	2887	3601
transcript_42777	gnl|BL_ORD_ID|80665 transcript_144016	1	1080	1080	1870	934	2013	2411	3203
transcript_41956	gnl|BL_ORD_ID|46022 transcript_89019	1	1002	1000	1451	4	1012	2729	3191
transcript_135777	gnl|BL_ORD_ID|84857 transcript_99498	1	1758	1757	2816	1432	3192	3367	4429
transcript_81986	gnl|BL_ORD_ID|23744 transcript_54355	1	1137	1134	1551	1751	2887	3411	3828
transcript_65478	gnl|BL_ORD_ID|64844 transcript_119026	1	1317	1317	2266	1415	2734	2868	3816
transcript_121992	gnl|BL_ORD_ID|17667 transcript_45360	1	1667	1665	1883	109	1776	1903	2122
transcript_45264	gnl|BL_ORD_ID|75000 transcript_134761	194	1611	2	196	2616	4028	1134	1329
transcript_101074	gnl|BL_ORD_ID|16175 transcript_42862	1	1820	1817	2579	1	1820	2126	2888
transcript_4418	gnl|BL_ORD_ID|18226 transcript_3669	2	2134	2130	2506	4	2134	2343	2714
transcript_141175	gnl|BL_ORD_ID|21251 transcript_50255	287	2485	50	291	380	2578	2	243
transcript_645	gnl|BL_ORD_ID|51647 transcript_98240	1	2226	2226	3719	5	2231	2521	4014
transcript_39022	gnl|BL_ORD_ID|33934 transcript_70205	131	1581	1	132	1957	3408	1720	1851
transcript_21406	gnl|BL_ORD_ID|49347 transcript_94496	389	1269	8	391	759	1640	2	385
transcript_47933	gnl|BL_ORD_ID|60520 transcript_111836	709	1911	8	710	1377	2591	2	714
transcript_119613	gnl|BL_ORD_ID|16055 transcript_42663	415	4700	146	420	485	4768	1	275
transcript_75980	gnl|BL_ORD_ID|73627 transcript_132409	249	1189	3	250	889	1832	458	705
transcript_126923	gnl|BL_ORD_ID|32132 transcript_67133	173	1184	2	172	294	1309	18	191
transcript_107774	gnl|BL_ORD_ID|34068 transcript_70424	358	1780	7	357	844	2265	5	355
transcript_1636	gnl|BL_ORD_ID|38645 transcript_78049	734	3042	93	736	3070	5383	1912	2555
transcript_127318	gnl|BL_ORD_ID|18143 transcript_3508	1185	2573	1	1186	1313	2700	3	1187
transcript_120276	gnl|BL_ORD_ID|33446 transcript_69346	1448	3182	1	1449	1920	3668	298	1744
transcript_37774	gnl|BL_ORD_ID|58951 transcript_109212	155	2214	14	156	514	2567	1	139
transcript_15757	gnl|BL_ORD_ID|54224 transcript_102529	1	1251	1250	1716	1	1251	1381	1847
transcript_22783	gnl|BL_ORD_ID|24770 transcript_56065	274	1151	4	275	4213	5088	3	257
transcript_106741	gnl|BL_ORD_ID|4054 transcript_20723	110	1053	3	109	399	1339	42	148
transcript_98143	gnl|BL_ORD_ID|36668 transcript_74777	1093	3019	1	1092	1249	3175	35	1125
transcript_10777	gnl|BL_ORD_ID|67985 transcript_124261	228	2026	5	230	363	2136	1	226
transcript_133813	gnl|BL_ORD_ID|14113 transcript_39396	1	1595	1592	2824	264	1855	2033	3265
transcript_106081	gnl|BL_ORD_ID|64557 transcript_118565	1	2224	2223	3262	1482	3700	3810	4852
transcript_102453	gnl|BL_ORD_ID|78020 transcript_139723	220	2509	1	221	717	2995	84	302
transcript_85706	gnl|BL_ORD_ID|84665 transcript_87828	758	1725	9	759	1132	2099	68	821
transcript_655	gnl|BL_ORD_ID|297 transcript_479	1182	3789	1	1184	1318	3924	14	1197
transcript_91837	gnl|BL_ORD_ID|43532 transcript_6307	1	1490	1491	2116	148	1621	1763	2388
transcript_115944	gnl|BL_ORD_ID|31770 transcript_66507	171	1345	4	170	313	1486	1	167
transcript_67925	gnl|BL_ORD_ID|58599 transcript_108638	654	1431	7	654	1541	2318	2	649
transcript_89910	gnl|BL_ORD_ID|28409 transcript_62178	250	3046	1	252	705	3504	2	253
transcript_141314	gnl|BL_ORD_ID|79885 transcript_142732	1	1535	1533	1891	1	1535	1658	2016
transcript_2896	gnl|BL_ORD_ID|16317 transcript_43091	205	2826	15	204	810	3434	2	191
transcript_88251	gnl|BL_ORD_ID|14 transcript_17	227	5484	1	230	359	5617	2	235
transcript_827	gnl|BL_ORD_ID|281 transcript_450	1	2557	2554	3609	3	2560	2728	3790
transcript_113679	gnl|BL_ORD_ID|42402 transcript_84246	1	1354	1352	2042	1071	2424	2606	3295
transcript_97044	gnl|BL_ORD_ID|55158 transcript_104077	2	2676	2678	2830	5	2679	2878	3033
transcript_62018	gnl|BL_ORD_ID|85050 transcript_112300	1	2158	2155	2468	31	2173	2628	2923
transcript_137028	gnl|BL_ORD_ID|415 transcript_698	1	2868	2867	3106	530	3419	3298	3536
transcript_19312	gnl|BL_ORD_ID|29795 transcript_64478	295	1394	3	300	1775	2882	1	322
transcript_88409	gnl|BL_ORD_ID|78916 transcript_141142	1	1567	1565	2196	2	1567	1696	2329
transcript_96115	gnl|BL_ORD_ID|30318 transcript_65353	1368	3038	1	1369	3277	4947	769	2136
transcript_81475	gnl|BL_ORD_ID|45866 transcript_88747	102	1028	1	102	2028	2959	1	102
transcript_1183	gnl|BL_ORD_ID|75457 transcript_135514	476	3406	51	477	533	3481	2	430
transcript_39916	gnl|BL_ORD_ID|68877 transcript_8722	241	1887	26	242	440	2117	2	219
transcript_37265	gnl|BL_ORD_ID|60496 transcript_111799	1	1235	1234	1719	529	1770	2118	2613
transcript_23673	gnl|BL_ORD_ID|3648 transcript_19922	454	1054	6	454	666	1264	71	519
transcript_56836	gnl|BL_ORD_ID|15950 transcript_42495	1037	2446	1	1040	1171	2580	14	1053
transcript_139441	gnl|BL_ORD_ID|52448 transcript_99552	1	1176	1176	1971	1	1199	1835	2631
transcript_2641	gnl|BL_ORD_ID|42402 transcript_84246	1	2224	2222	2877	201	2424	2606	3269
transcript_51528	gnl|BL_ORD_ID|14173 transcript_39494	11	1737	1734	2699	2	1724	1853	2819
transcript_133676	gnl|BL_ORD_ID|51762 transcript_98419	12	2156	2154	2510	1	2145	2322	2676
transcript_52153	gnl|BL_ORD_ID|7955 transcript_1779	1	1883	1881	2970	62	1944	2065	3154
transcript_145665	gnl|BL_ORD_ID|34793 transcript_71614	1050	2861	1	1052	2146	3958	1	1053
transcript_95010	gnl|BL_ORD_ID|64535 transcript_118524	1	2025	2022	3925	2150	4170	4295	6208
transcript_123839	gnl|BL_ORD_ID|41941 transcript_83464	334	2271	72	336	1687	3637	1	265
transcript_124878	gnl|BL_ORD_ID|78845 transcript_141028	1	3290	3286	3754	4456	7745	7900	8368
transcript_5478	gnl|BL_ORD_ID|72897 transcript_131198	1	1324	1324	2491	10	1338	1490	2660
transcript_14079	gnl|BL_ORD_ID|37757 transcript_76587	302	1791	5	304	490	1980	4	303
transcript_145673	gnl|BL_ORD_ID|56547 transcript_7972	1	1179	1179	1545	54	1220	1852	2218
transcript_23428	gnl|BL_ORD_ID|66636 transcript_121947	110	1051	2	111	254	1195	1	110
transcript_42651	gnl|BL_ORD_ID|82115 transcript_10889	1	1215	1216	1876	33	1246	1364	2027
transcript_105496	gnl|BL_ORD_ID|64285 transcript_118124	1051	2876	1	1053	3213	5037	120	1172
transcript_143399	gnl|BL_ORD_ID|31126 transcript_5507	1	1044	1043	1400	1	1044	2059	2416
transcript_123966	gnl|BL_ORD_ID|60476 transcript_111765	1091	3238	1	1093	3145	5292	1829	2921
transcript_120473	gnl|BL_ORD_ID|32412 transcript_67629	1	2066	2066	2596	922	2987	3678	4191
transcript_15059	gnl|BL_ORD_ID|25473 transcript_57197	416	1760	9	417	684	2026	2	410
transcript_112959	gnl|BL_ORD_ID|51697 transcript_98322	1	1079	1078	1517	1	1076	1677	2115
transcript_143412	gnl|BL_ORD_ID|49703 transcript_95055	13	2790	2790	3318	2	2771	2926	3452
transcript_114339	gnl|BL_ORD_ID|18042 transcript_3319	1	1325	1321	1678	855	2177	2418	2777
transcript_64099	gnl|BL_ORD_ID|58067 transcript_107771	1	1177	1177	1353	8	1184	1304	1480
transcript_55448	gnl|BL_ORD_ID|69324 transcript_9572	1	1618	1618	1825	1	1618	1891	2098
transcript_5778	gnl|BL_ORD_ID|30757 transcript_4812	1	1755	1754	2431	1	1773	1875	2555
transcript_137791	gnl|BL_ORD_ID|56253 transcript_7412	1	1353	1348	1956	2	1355	1527	2134
transcript_40826	gnl|BL_ORD_ID|84755 transcript_93392	12	1952	1950	2385	2	1937	2842	3279
transcript_81986	gnl|BL_ORD_ID|43148 transcript_85465	1	1137	1134	1517	1247	2383	2907	3290
transcript_140479	gnl|BL_ORD_ID|67855 transcript_124028	292	3550	1	293	403	3661	4	296
transcript_101151	gnl|BL_ORD_ID|74312 transcript_133596	1	1282	1281	1957	197	1478	2786	3462
transcript_3229	gnl|BL_ORD_ID|73885 transcript_132818	1	2284	2282	2784	5	2292	2685	3187
transcript_64561	gnl|BL_ORD_ID|45094 transcript_87488	10	1440	1440	1967	1	1435	1635	2162
transcript_53468	gnl|BL_ORD_ID|30847 transcript_4992	174	2282	1	175	397	2478	2	176
transcript_89843	gnl|BL_ORD_ID|33451 transcript_69364	2	2045	2045	3389	63	2112	2276	3624
transcript_143534	gnl|BL_ORD_ID|71696 transcript_129193	1	3318	3317	4655	2583	5901	6006	7356
transcript_33599	gnl|BL_ORD_ID|63370 transcript_116573	1	2852	2851	3421	438	3301	3441	4011
transcript_115456	gnl|BL_ORD_ID|74165 transcript_133335	1	1618	1616	2410	971	2590	2705	3510
transcript_22081	gnl|BL_ORD_ID|53523 transcript_101363	225	1241	29	228	608	1632	4	202
transcript_97164	gnl|BL_ORD_ID|23771 transcript_54399	149	3898	1	150	717	4446	2	148
transcript_137475	gnl|BL_ORD_ID|22018 transcript_51576	2	2059	2057	2659	60	2118	2478	3088
transcript_69428	gnl|BL_ORD_ID|16835 transcript_43980	1	1747	1748	2501	19	1765	1880	2634
transcript_83371	gnl|BL_ORD_ID|11309 transcript_34635	103	1491	1	103	692	2079	72	174
transcript_81986	gnl|BL_ORD_ID|54135 transcript_102370	1	1137	1134	1551	1127	2264	2788	3205
transcript_98499	gnl|BL_ORD_ID|45723 transcript_88523	1	1533	1532	1956	1	1533	1726	2150
transcript_93998	gnl|BL_ORD_ID|22984 transcript_53138	226	2397	1	226	754	2932	2	230
transcript_36998	gnl|BL_ORD_ID|66580 transcript_121854	1	1459	1458	2408	370	1827	2003	2934
transcript_13866	gnl|BL_ORD_ID|54570 transcript_103102	1	1299	1296	1837	1	1299	1548	2090
transcript_20111	gnl|BL_ORD_ID|40043 transcript_80257	377	1381	9	376	903	1907	2	369
transcript_91280	gnl|BL_ORD_ID|44362 transcript_86328	287	1197	3	287	419	1329	23	307
[truncated: 1,134 more rows]
