# Supplementary material for: A bZIP transcription factor, PqbZIP1, is involved in the plant defense response of American ginseng
Source: PeerJ. 2022 Mar 8;10:e12939. doi: 10.7717/peerj.12939 (PMC8916028; doi:10.7717/peerj.12939)
Supplement: Supplemental Information 10 [file peerj-10-12939-s010.xlsx]

## Sheet: Sheet1
Table S6. Simple sequence repeats (SSR) analysis of transcript sequences
#Gene_ID	SSR_nr	SSR_type	SSR	Size	SSR_Start	SSR_End	FPr1(5'-3')	Tm	Size	RPr1(5'-3')	Tm	Size	PSize	PStart	PEnd	FPr2(5'-3')	Tm	Size	RPr2(5'-3')	Tm	Size	PSize	PStart	PEnd	FPr3(5'-3')	Tm	Size	RPr3(5'-3')	Tm	Size	PSize	PStart	PEnd
F01_transcript_1	1	p6	(TTTTGC)5	30	7366	7395	GGCGGAGATTTATGGTTTGA	59.901	20	TTTGGGTGGACTCTTGAACC	59.943	20	279	7156	7434	TAGCAAAGAGGTTTGCGGAT	59.845	20	TTTGGGTGGACTCTTGAACC	59.943	20	234	7201	7434	TAGCAAAGAGGTTTGCGGAT	59.845	20	TTCCTTTGGGTGGACTCTTG	60.081	20	238	7201	7438
F01_transcript_2	1	p2	(CT)6	12	141	152	CGCAGCCTGTTGTTGGTAG	60.456	19	ACGGGAGACAAACGGATAAA	59.429	20	167	30	196	CGCAGCCTGTTGTTGGTAG	60.456	19	AACGGGAGACAAACGGATAA	59.429	20	168	30	197	CGCAGCCTGTTGTTGGTAG	60.456	19	CGGGAGACAAACGGATAAAC	59.429	20	166	30	195
F01_transcript_4	1	p3	(TGC)5	15	1909	1923	TGCATTGTGATCTTGTGGGT	59.967	20	GCCAGTCCAAGCCAATATGT	59.962	20	264	1772	2035	GCATTGTGATCTTGTGGGTG	59.967	20	GCCAGTCCAAGCCAATATGT	59.962	20	263	1773	2035	TGCATTGTGATCTTGTGGGT	59.967	20	AGCCAGTCCAAGCCAATATG	60.096	20	265	1772	2036
F01_transcript_5	1	p1	(A)10	10	87	96	AGGAGGAAGCAGTAGCTGGA	59.187	20	AGCTTCGAGAAGAGGCACAG	59.891	20	262	25	286	GAGGAGGAAGCAGTAGCTGG	59.187	20	AGCTTCGAGAAGAGGCACAG	59.891	20	263	24	286	AGGAGGAAGCAGTAGCTGGA	59.187	20	CCACCATAGCCAATGAATCC	60.155	20	230	25	254
F01_transcript_8	1	p2	(AG)8	16	129	144	GGAAGCTCACACGATATTCTTC	57.955	22	TTATCGGCGATCAAACATACC	59.809	21	268	0	267	GGAAGCTCACACGATATTCTTCT	58.929	23	TTATCGGCGATCAAACATACC	59.809	21	268	0	267	GGAAGCTCACACGATATTCTTCTT	60.153	24	TTATCGGCGATCAAACATACC	59.809	21	268	0	267
F01_transcript_8	2	p3	(CTT)5	15	357	371	TTAAATCCGCGATTTTGAGG	60.033	20	CGGGTTGAGATCGATGAAAT	59.894	20	208	275	482	TTGTATGGAAACTCGGAGCC	60.074	20	CGGGTTGAGATCGATGAAAT	59.894	20	177	306	482	TTAAATCCGCGATTTTGAGG	60.033	20	AGATGTAGAAGTGGCGGCAG	60.419	20	158	275	432
F01_transcript_8	3	p3	(TGA)6	18	3592	3609	CTGAGGATGAGGAGCTGGAC	59.945	20	TCATCAGCAGAATCACCCAA	60.201	20	178	3518	3695	CTGAGGATGAGGAGCTGGAC	59.945	20	CTGTTGTGGCTCTGCTGCTA	60.347	20	252	3518	3769	CAGACAAGAAATGCTGCTCG	59.74	20	TCATCAGCAGAATCACCCAA	60.201	20	257	3439	3695
F01_transcript_9	1	p3	(CTT)8	24	232	255	TTGTATGGAAACTCGGAGCC	60.074	20	CCATTGTTGAAGCTCGTGAA	59.84	20	209	181	389	TTAAATCCGTGACTGAGGGG	59.926	20	CCATTGTTGAAGCTCGTGAA	59.84	20	239	151	389	TTGTATGGAAACTCGGAGCC	60.074	20	TCATCCATTGTTGAAGCTCG	59.799	20	213	181	393
F01_transcript_21	1	p3	(CAC)5	15	678	692	ATGAGGATGTTGAGGTTGCC	59.934	20	GACAGAAACGCCGATCATTT	60.081	20	251	605	855	ATGAGGATGTTGAGGTTGCC	59.934	20	GATCATTTCATCAGCGGCTT	60.185	20	239	605	843	ATGAGGATGTTGAGGTTGCC	59.934	20	ATCATTTCATCAGCGGCTTT	59.674	20	238	605	842
F01_transcript_21	2	p3	(CAG)6	18	4839	4856	TTACATTGTCCTCGCAGCAG	60.011	20	AGAATGAGGAGGTTGGGCTT	60.074	20	251	4698	4948	TTACATTGTCCTCGCAGCAG	60.011	20	AGGAGGTTGGGCTTGAAGAT	60.074	20	245	4698	4942	TGCCTCATCTTCAAATGCTG	59.948	20	AGAATGAGGAGGTTGGGCTT	60.074	20	145	4804	4948
F01_transcript_22	1	c	(GCA)10gcttcaactgcagttctcgaagcagacatt(GCA)5	75	4848	4922	TCCATCAATTCTTGGGAACC	59.727	20	ATAATACCCGCCACTTGCAG	59.982	20	232	4778	5009	TCACCATCAATTTCGAGCAA	60.197	20	TGCAGCTGAAGCATTCAAAC	60.142	20	267	4728	4994	CTCACCATCAATTTCGAGCA	59.799	20	TGCAGCTGAAGCATTCAAAC	60.142	20	268	4727	4994
F01_transcript_26	1	p1	(T)11	11	5459	5469	TGGCAGTTGATGTTTTTCCA	60.088	20	AGACCTTCGCTTTTTAGCCC	59.856	20	115	5406	5520	GTCCATCACAAACACCACCA	60.27	20	AGACCTTCGCTTTTTAGCCC	59.856	20	260	5261	5520	TGGTCCATCACAAACACCAC	60.27	20	AGACCTTCGCTTTTTAGCCC	59.856	20	262	5259	5520
F01_transcript_27	1	c	(AG)8(TG)8(CG)6	44	33	76	--
F01_transcript_29	1	p2	(CT)6	12	65	76	TCCTTCAATTTCATTTTTCGC	59.18	21	TGATGTGATGAATCGCCAAT	59.89	20	177	18	194	TCCTTCAATTTCATTTTTCGC	59.18	21	GAGATCTGACAAACCCTCGC	59.81	20	131	18	148	TCCTTCAATTTCATTTTTCGCT	60.076	22	TGTTGGCGAGGAAGAGAAGT	59.989	20	229	18	246
F01_transcript_38	1	p4	(CTCC)5	20	54	73	GGGCTAATTGCTTGATTTGG	59.547	20	CCGGTATTCGATCAGCATTT	59.923	20	145	27	171	GTTCCAGAGCAGGGGCTAAT	60.599	20	CCGGTATTCGATCAGCATTT	59.923	20	157	15	171	AATGAAGTTCCAGAGCAGGG	59.284	20	CCGGTATTCGATCAGCATTT	59.923	20	163	9	171
F01_transcript_38	2	p2	(AT)20	40	420	459	TTTCCCAAGAAACCAACTGC	60.088	20	TTCCCAAGATCATCACCCAT	60.135	20	276	358	633	TCCCAAGAAACCAACTGCTC	60.232	20	TTCCCAAGATCATCACCCAT	60.135	20	274	360	633	TTCCCAAGAAACCAACTGCT	59.711	20	TTCCCAAGATCATCACCCAT	60.135	20	275	359	633
F01_transcript_41	1	c	(AGC)6(AGA)5	33	92	124	AGACGAAGATGAAGTTTTGCG	59.508	21	TTGGGCTGTGTTGATTTGAA	60.088	20	262	46	307	GACGAAGATGAAGTTTTGCG	58.502	20	TTGGGCTGTGTTGATTTGAA	60.088	20	261	47	307	GACGAAGATGAAGTTTTGCGT	59.373	21	TTGGGCTGTGTTGATTTGAA	60.088	20	261	47	307
F01_transcript_41	2	p1	(T)10	10	1281	1290	GCTTCTCGCAACATGACATT	58.879	20	GAAACAAACATTGAAGATGCACA	60.032	23	268	1136	1403	TGCTTCTCGCAACATGACA	60.13	19	GAAACAAACATTGAAGATGCACA	60.032	23	269	1135	1403	CTGCTTCTCGCAACATGACA	61.171	20	GAAACAAACATTGAAGATGCACA	60.032	23	270	1134	1403
F01_transcript_41	3	p1	(T)10	10	1436	1445	TGTGCATCTTCAATGTTTGTTTC	60.032	23	AGCATAAGCAAGGGCAACAG	60.407	20	228	1381	1608	TGTGCATCTTCAATGTTTGTTTC	60.032	23	CAACAGCAAAACAAAGGCAG	59.507	20	214	1381	1594	TGTGCATCTTCAATGTTTGTTTC	60.032	23	AACTGGAGCATAAGCAAGGG	59.336	20	234	1381	1614
F01_transcript_41	4	p2	(AT)18	36	2695	2730	TGAAACCCATTTCAATACAACTTC	59.311	24	GCAAGATTTGTACGCGATTT	57.925	20	243	2642	2884	TGAAACCCATTTCAATACAACTTC	59.311	24	AGCAAGATTTGTACGCGATTT	58.914	21	244	2642	2885	TGAAACCCATTTCAATACAACTTC	59.311	24	TTTAGCAAGATTTGTACGCGA	58.645	21	247	2642	2888
F01_transcript_41	5	p2	(AT)27	54	3406	3459	CGGTCCGGTTTAATGAAAAA	59.805	20	GTTGACCAGAACCTGGCACT	60.159	20	249	3274	3522	CCTTTGTGGACCTAATCCCA	59.784	20	GTTGACCAGAACCTGGCACT	60.159	20	185	3338	3522	CCTTTGTGGACCTAATCCCA	59.784	20	GTTGTTGACCAGAACCTGGC	60.555	20	188	3338	3525
F01_transcript_45	1	p3	(GAT)5	15	487	501	AGAATGTTCACCGCCTCAAC	60.119	20	CCAGCTCAATTAATCCCGAA	60.031	20	262	342	603	CTACGCCGTTTTGGGAATAA	59.958	20	GCTCAAGTCCTGGTGAGACC	59.841	20	187	437	623	AGAATGTTCACCGCCTCAAC	60.119	20	ACCCCAGCTCAATTAATCCC	60.152	20	265	342	606
F01_transcript_46	1	p1	(T)14	14	145	158	TGCGTGTTGTGATTTTTGGT	60.011	20	CAAGCACATCACTCACCAGAG	59.477	21	278	8	285	TTGCGTGTTGTGATTTTTGG	60.535	20	CAAGCACATCACTCACCAGAG	59.477	21	279	7	285	TGCGTGTTGTGATTTTTGGT	60.011	20	TCACTCACCAGAGTTCCTTTGA	59.884	22	270	8	277
F01_transcript_51	1	c	(AT)6acacaaaacacc(TA)16	56	27	82	ACGAGAACACGCAGACACAT	59.341	20	AACTGCTTCGGAGTGATGCT	60.02	20	138	4	141	ACGAGAACACGCAGACACAT	59.341	20	ATGCTGATGCTGCTTCATTG	59.979	20	123	4	126	ACGAGAACACGCAGACACAT	59.341	20	TGATGATGAGGAGCTTGACG	59.942	20	159	4	162
F01_transcript_53	1	p2	(CT)6	12	123	134	CATTTTCTCACACCCACACG	60.001	20	ACCAAACCAATGGCTCAAAA	60.344	20	219	98	316	TCGTCATTTTCTCACACCCA	60.088	20	ACCAAACCAATGGCTCAAAA	60.344	20	223	94	316	CATTTTCTCACACCCACACG	60.001	20	CCACAGGCTGACAATACCAA	59.566	20	234	98	331
F01_transcript_55	1	p1	(T)20	20	4923	4942	AGCCTTTCAGTTTTTGCACG	60.42	20	ATTCTACAGCTTGGCAGGGA	59.836	20	173	4798	4970	AGCCTTTCAGTTTTTGCACG	60.42	20	TTCTACAGCTTGGCAGGGAT	59.836	20	172	4798	4969	AGCCTTTCAGTTTTTGCACG	60.42	20	AATGCTGCCCTAAGAACCAA	59.708	20	280	4798	5077
F01_transcript_56	1	p2	(AG)7	14	41	54	CCTGGTGCTTATAAATCATTGAA	58.212	23	AACCAAAACAAGTCGTTGGG	59.869	20	128	6	133	CCTGGTGCTTATAAATCATTGAA	58.212	23	CGTTGGGGAGAAAATATCCA	59.756	20	115	6	120	CCTGGTGCTTATAAATCATTGAA	58.212	23	TGACGAACCAAAACAAGTCG	59.734	20	133	6	138
F01_transcript_57	1	p2	(GA)8	16	65	80	AAGAGAGGGAGAGGGAGAGG	58.98	20	GCTCGTGGAAAGAGAACCTG	59.989	20	161	34	194	AAGAGAGGGAGAGGGAGAGG	58.98	20	GAATGAAATGGGTGAGTGGG	60.173	20	258	34	291	AAGAGAGGGAGAGGGAGAGG	58.98	20	AAATGGGTGAGTGGGTTCAG	59.82	20	253	34	286
F01_transcript_59	1	p1	(T)10	10	4924	4933	CGACAATTCCAGCATACCCT	59.955	20	ATTCTACAGCTTGGCAGGGA	59.836	20	267	4701	4967	TGGACGACAATTCCAGCATA	60.073	20	ATTCTACAGCTTGGCAGGGA	59.836	20	271	4697	4967	TGGACGACAATTCCAGCATA	60.073	20	TTCTACAGCTTGGCAGGGAT	59.836	20	270	4697	4966
F01_transcript_64	1	p1	(T)11	11	4957	4967	GCGAAGGAGTTGAGGTTGTC	59.851	20	AATTACAAACAGGGGAGGGG	60.046	20	185	4895	5079	GCGAAGGAGTTGAGGTTGTC	59.851	20	GAGGGGCATTGTCTTGGTAA	59.933	20	171	4895	5065	GCGAAGGAGTTGAGGTTGTC	59.851	20	ATGCAAAAAGCCCAACAAAG	60.11	20	110	4895	5004
F01_transcript_65	1	p4	(ATAG)6	24	11	34	--
F01_transcript_65	2	p3	(GAT)5	15	448	462	TCAGGGGTTTTACGACTTGG	59.964	20	TGAAGATGATGAAGGGGCAT	60.426	20	238	248	485	CAGGGGTTTTACGACTTGGA	59.964	20	TGAAGATGATGAAGGGGCAT	60.426	20	237	249	485	CTGGATTGTGAGGGATCGTT	59.927	20	ACTCAAATTGGCAAAGGCAT	59.574	20	207	339	545
F01_transcript_65	3	p1	(T)10	10	5146	5155	--
F01_transcript_72	1	p2	(AT)8	16	248	263	AACGATCGTATGGTAGGCCA	60.352	20	ACTCTTCGCGCTTTATGAGC	59.758	20	245	136	380	TAGGCCACAAATTGGGAGAA	60.439	20	ACTCTTCGCGCTTTATGAGC	59.758	20	232	149	380	TGGAAAGGAGCATTTGCCTA	60.712	20	ACTCTTCGCGCTTTATGAGC	59.758	20	273	108	380
F01_transcript_72	2	p1	(A)14	14	2115	2128	AAAACAATTGCAGGTGCTGA	59.322	20	TGTTTGGCACTGCTTCTTTG	60.027	20	248	2032	2279	AAAACAATTGCAGGTGCTGA	59.322	20	ACACATCAATTCTCGAGCCC	60.081	20	163	2032	2194	AAAACAATTGCAGGTGCTGA	59.322	20	CCGCTGTTATCCGCTACATT	60.117	20	144	2032	2175
F01_transcript_82	1	p1	(T)10	10	120	129	TGTTTTTGCCGAGTTTGTCA	60.271	20	ATTCATTCCACTTCGCCTTG	60.074	20	169	3	171	GGTTGTTTTTGCCGAGTTTG	60.514	20	ATTCATTCCACTTCGCCTTG	60.074	20	172	0	171	TGTTTTTGCCGAGTTTGTCA	60.271	20	GAAATTCATTCCACTTCGCC	59.51	20	172	3	174
F01_transcript_83	1	p4	(CTCG)5	20	155	174	TTTCTCTCCGCCTTCTTTGA	60.066	20	CCGAACTTAGACAAATCGGC	59.708	20	168	118	285	GGCCGCAAACAAAATTAAGA	60.075	20	CCGAACTTAGACAAATCGGC	59.708	20	275	11	285	TTTCTCTCCGCCTTCTTTGA	60.066	20	GACAAATCGGCAACTGTTCA	59.697	20	159	118	276
F01_transcript_84	1	c	(CT)13(AT)17	60	71	130	TGTGGTGGAAATTGTGAAAA	57.415	20	TTTCAGCATAACATGCCTGC	59.839	20	144	45	188	CAGTAGACAGACAGACTGGGGA	59.371	22	TTTCAGCATAACATGCCTGC	59.839	20	187	2	188	AGACAGACAGACTGGGGAGA	57.309	20	TTTCAGCATAACATGCCTGC	59.839	20	183	6	188
F01_transcript_84	2	p3	(GTG)5	15	4652	4666	CCGGCTTCACTGTTGTTTTT	60.147	20	ACCAGCCAGCCATAAAAATG	59.96	20	262	4555	4816	GCATTCACCTTTGCCTTCTC	59.82	20	ACCAGCCAGCCATAAAAATG	59.96	20	242	4575	4816	CCTTTGCCTTCTCCATCAAG	59.807	20	ACCAGCCAGCCATAAAAATG	59.96	20	235	4582	4816
F01_transcript_85	1	p1	(T)10	10	3687	3696	TGCAGTTTTGCTGATTGGAG	59.988	20	CTGGCATTGTGCTCTTTTGA	59.988	20	248	3522	3769	TTTCAATTGGTCTGCTGCTG	59.988	20	CTGGCATTGTGCTCTTTTGA	59.988	20	195	3575	3769	TTCCTGTTGCAGTTTTGCTG	60.027	20	CTGGCATTGTGCTCTTTTGA	59.988	20	255	3515	3769
F01_transcript_88	1	p4	(TAGA)6	24	4730	4753	GGGCATTCAACTTCCAAAGA	60.051	20	ACGGATGATGCCCTTACAAC	59.82	20	200	4706	4905	TCGCCTTCATCTTTGCCTAT	59.807	20	ACGGATGATGCCCTTACAAC	59.82	20	227	4679	4905	GGGCATTCAACTTCCAAAGA	60.051	20	AATGGAATACGGATGATGCC	59.61	20	208	4706	4913
F01_transcript_94	1	p1	(T)10	10	3646	3655	TGCAGTTTTGCTGATTGGAG	59.988	20	CTGGCATTGTGCTCTTTTGA	59.988	20	249	3480	3728	TTTCAATTGGTCTGCTGCTG	59.988	20	CTGGCATTGTGCTCTTTTGA	59.988	20	196	3533	3728	TTCCTGTTGCAGTTTTGCTG	60.027	20	CTGGCATTGTGCTCTTTTGA	59.988	20	256	3473	3728
F01_transcript_94	2	p1	(T)10	10	4851	4860	--
F01_transcript_98	1	p1	(T)10	10	702	711	TGGACAACAAGTTCCCAACA	59.976	20	GAGGTCGACTGGGATTTGAG	59.655	20	141	659	799	TGGACAACAAGTTCCCAACA	59.976	20	AGAGGTCGACTGGGATTTGA	59.655	20	142	659	800	TGGACAACAAGTTCCCAACA	59.976	20	GAGAGGTCGACTGGGATTTG	59.655	20	143	659	801
F01_transcript_98	2	c	(AC)16(AT)14	60	934	993	TCAAATCCCAGTCGACCTCT	59.655	20	GCTATCTGCTTATTTTGAGAAGCC	59.923	24	263	781	1043	CTCAAATCCCAGTCGACCTC	59.655	20	GCTATCTGCTTATTTTGAGAAGCC	59.923	24	264	780	1043	ATTACCCGTCTTTCTCACGG	59.052	20	GCTATCTGCTTATTTTGAGAAGCC	59.923	24	218	826	1043
F01_transcript_98	3	p1	(T)10	10	2677	2686	AAATGTACTCACGGCCGAAC	60	20	TCACAAAGCAACATTTCCCA	60.088	20	246	2508	2753	ACCACATGTCACAAAAGCCA	60.008	20	TCACAAAGCAACATTTCCCA	60.088	20	187	2567	2753	ATGGGACCACATGTCACAAA	59.656	20	TCACAAAGCAACATTTCCCA	60.088	20	192	2562	2753
F01_transcript_101	1	p1	(T)10	10	3559	3568	TGCAGTTTTGCTGATTGGAG	59.988	20	CTGGCATTGTGCTCTTTTGA	59.988	20	249	3393	3641	TTTCAATTGGTCTGCTGCTG	59.988	20	CTGGCATTGTGCTCTTTTGA	59.988	20	196	3446	3641	TTCCTGTTGCAGTTTTGCTG	60.027	20	CTGGCATTGTGCTCTTTTGA	59.988	20	256	3386	3641
F01_transcript_101	2	p1	(T)10	10	4764	4773	--
F01_transcript_104	1	p1	(T)10	10	3600	3609	TGCAGTTTTGCTGATTGGAG	59.988	20	CTGGCATTGTGCTCTTTTGA	59.988	20	248	3435	3682	TTTCAATTGGTCTGCTGCTG	59.988	20	CTGGCATTGTGCTCTTTTGA	59.988	20	195	3488	3682	TTCCTGTTGCAGTTTTGCTG	60.027	20	CTGGCATTGTGCTCTTTTGA	59.988	20	255	3428	3682
F01_transcript_108	1	p2	(CT)13	26	40	65	TCCGATTTCCAATTCTCCAG	60.006	20	ACCGACAATGCAAGGAGAAG	60.255	20	210	7	216	TCCGATTTCCAATTCTCCAG	60.006	20	TTACCGACAATGCAAGGAGA	59.272	20	212	7	218	TCGTCCGATTTCCAATTCTC	60.014	20	TGAGAAGTCGCTTGAGGTTG	59.161	20	248	4	251
F01_transcript_109	1	p4	(GAAG)6	24	64	87	CAGCCTGTGGAAAGAGGAAG	59.982	20	GCTCAACGACAACAACGAGA	60.032	20	166	31	196	CAGCCTGTGGAAAGAGGAAG	59.982	20	GAGCTCAACGACAACAACGA	60.032	20	168	31	198	CAGCCTGTGGAAAGAGGAAG	59.982	20	GAATTCTTCGCAAAAGCGAC	59.967	20	280	31	310
F01_transcript_109	2	p3	(GAA)5	15	209	223	CAGCCTGTGGAAAGAGGAAG	59.982	20	GAATTCTTCGCAAAAGCGAC	59.967	20	280	31	310	CAGCCTGTGGAAAGAGGAAG	59.982	20	CACGAGATCGGATTGGAGAT	60.034	20	234	31	264	TCTCGTTGTTGTCGTTGAGC	60.032	20	CACGGAGATTTAAACCGGAA	59.931	20	151	177	327
F01_transcript_120	1	p1	(T)10	10	3600	3609	TGCAGTTTTGCTGATTGGAG	59.988	20	CTGGCATTGTGCTCTTTTGA	59.988	20	246	3437	3682	TTTCAATTGGTCTGCTGCTG	59.988	20	CTGGCATTGTGCTCTTTTGA	59.988	20	193	3490	3682	TTCCTGTTGCAGTTTTGCTG	60.027	20	CTGGCATTGTGCTCTTTTGA	59.988	20	253	3430	3682
F01_transcript_125	1	p1	(T)14	14	4476	4489	ACAAGGGAGGCAAAGACAAA	59.711	20	GCTCCCTTACGATGAAGGTG	59.694	20	257	4386	4642	GTCACAAGGGAGGCAAAGAC	59.703	20	GCTCCCTTACGATGAAGGTG	59.694	20	260	4383	4642	ACCCCTGGGTGTAATTTGGT	60.34	20	GCTCCCTTACGATGAAGGTG	59.694	20	278	4365	4642
F01_transcript_143	1	p3	(CTC)5	15	4056	4070	GTGCTCCTCCTCCAACAGAG	59.986	20	TGCACTTAATGCTGCTGAGG	60.157	20	209	3980	4188	CCAGGCAAGCCATTGTTATT	59.96	20	TGCACTTAATGCTGCTGAGG	60.157	20	255	3934	4188	AGTGCTCCTCCTCCAACAGA	59.986	20	CCCCCAGTAGCTGATTCTGA	60.21	20	182	3979	4160
F01_transcript_148	1	p2	(TA)13	26	758	783	ACCTGCCAACCTTGATGAAT	59.41	20	TGGATTGATTGAGCAAAGCAT	60.6	21	237	669	905	CGACCAAAGTTTCATCAGCTC	59.867	21	CACAACTGGATTGATTGAGCA	59.707	21	267	645	911	TCGACCAAAGTTTCATCAGC	58.85	20	CACAACTGGATTGATTGAGCA	59.707	21	268	644	911
F01_transcript_149	1	p1	(T)11	11	268	278	ACGAGGTCCGATTACGTGAC	59.997	20	ACACGAAATCCAGCTCCACT	59.727	20	165	206	370	ACGAGGTCCGATTACGTGAC	59.997	20	AATCCAGCTCCACTTTTCCA	59.67	20	159	206	364	AGATCGTTTACGAGGTCCGA	59.694	20	ACACGAAATCCAGCTCCACT	59.727	20	174	197	370
F01_transcript_158	1	p1	(A)10	10	2839	2848	TGAAAATAATCCGCCTGAGC	60.175	20	ATCCCTGGTGTATTTTCCCC	59.881	20	279	2652	2930	GAAAATAATCCGCCTGAGCA	60.175	20	ATCCCTGGTGTATTTTCCCC	59.881	20	278	2653	2930	TGAAAATAATCCGCCTGAGC	60.175	20	CTGGTGTATTTTCCCCGTTG	60.22	20	275	2652	2926
F01_transcript_160	1	p1	(T)11	11	4	14	--
F01_transcript_162	1	c	(TC)13(TA)20	66	116	181	GCCAAATTCCCTTCCTCTTT	59.532	20	AATGGACCGATTGTTTGGAA	60.17	20	275	64	338	GCCAAATTCCCTTCCTCTTT	59.532	20	AGAATGGACCGATTGTTTGG	59.79	20	277	64	340	ATGTTCAGTGCTCGCAAATG	59.871	20	CGATGGTAGAGAAGGCATGG	60.615	20	254	14	267
F01_transcript_162	2	p2	(TA)7	14	2338	2351	CAAATGGACTCTGGGCATCT	60.073	20	GAGCTGTTTCTGGAAAAAGGATT	60.121	23	274	2211	2484	CTCAAATGGACTCTGGGCAT	60.073	20	GAGCTGTTTCTGGAAAAAGGATT	60.121	23	276	2209	2484	CAAATGGACTCTGGGCATCT	60.073	20	GCTGTTTCTGGAAAAAGGATT	57.479	21	272	2211	2482
F01_transcript_166	1	p6	(AGGGAT)5	30	1990	2019	GTCAGTAAAGAACAGCCGCC	59.882	20	TCCATCATGGGTATCCTCGT	60.158	20	264	1896	2159	GTCAGTAAAGAACAGCCGCC	59.882	20	TGCTCTGTCGGCATATCATC	59.788	20	152	1896	2047	GTCAGTAAAGAACAGCCGCC	59.882	20	CTCCATCATGGGTATCCTCG	60.295	20	265	1896	2160
F01_transcript_166	2	p2	(AT)22	44	4466	4509	--
F01_transcript_175	1	p2	(AC)8	16	26	41	--
F01_transcript_177	1	p3	(CTT)7	21	187	207	GATGATGGTCCCACCAATTC	59.995	20	TGGGAATCTACCGACCAAAA	60.301	20	203	142	344	GATGATGGTCCCACCAATTC	59.995	20	TTGGGAATCTACCGACCAAA	60.301	20	204	142	345	GATGATGGTCCCACCAATTC	59.995	20	TTTGGGAATCTACCGACCAA	60.301	20	205	142	346
F01_transcript_184	1	c	(AAT)7(ATT)12atagtac(TAA)5(TTA)5	94	410	503	TCCTCTCTTCTTCACACACACAA	59.938	23	ATTTGGGCGGGAATTTTTAG	60.142	20	275	383	657	CTCCTCTCTTCTTCACACACACA	59.552	23	ATTTGGGCGGGAATTTTTAG	60.142	20	276	382	657	TCCTCTCTTCTTCACACACACA	58.491	22	ATTTGGGCGGGAATTTTTAG	60.142	20	275	383	657
F01_transcript_184	2	p2	(AT)23	46	1000	1045	TTTAGGCACGGGCAATTACT	59.609	20	CCACCATCCATCTCTCTAATTCTC	60.329	24	271	970	1240	TTTAGGCACGGGCAATTACT	59.609	20	CCACCATCCATCTCTCTAATTCT	58.613	23	271	970	1240	TTTAGGCACGGGCAATTACT	59.609	20	CCACCATCCATCTCTCTAATTC	57.611	22	271	970	1240
F01_transcript_184	3	p2	(TA)8	16	4223	4238	AAAATAGCGTCTCGCCTCAA	59.982	20	AGCACCAAGTTTTGCCAAGT	59.78	20	180	4116	4295	AGCATTTGAACGTGATGCTG	59.871	20	AGCACCAAGTTTTGCCAAGT	59.78	20	150	4146	4295	CAGCATTTGAACGTGATGCT	59.871	20	AGCACCAAGTTTTGCCAAGT	59.78	20	151	4145	4295
F01_transcript_189	1	p2	(AT)8	16	2713	2728	TCTTCACTGGTCCACAATCA	57.543	20	GGTGCATTGCAAATATGACG	59.96	20	265	2677	2941	AATCTTCACTGGTCCACAATCA	59.454	22	GGTGCATTGCAAATATGACG	59.96	20	267	2675	2941	ATCTTCACTGGTCCACAATCA	57.985	21	GGTGCATTGCAAATATGACG	59.96	20	266	2676	2941
F01_transcript_192	1	p2	(TA)14	28	22	49	--
F01_transcript_192	2	p1	(T)10	10	681	690	CACGGTGGCTCTCAGGTAAT	60.134	20	TGGCTGGATAATAATTTTTGGG	60.037	22	229	597	825	TCTTCGGCGTTTATGATGGT	60.469	20	TGGCTGGATAATAATTTTTGGG	60.037	22	249	577	825	CTTCGGCGTTTATGATGGTC	60.469	20	TGGCTGGATAATAATTTTTGGG	60.037	22	248	578	825
F01_transcript_194	1	p1	(A)13	13	4238	4250	TTTTTGGACCATTTTCTGGG	59.772	20	TGCATGGGATCATTACAGGA	59.883	20	229	4152	4380	TGGGCACAACCAACTGTCTA	60.152	20	CTATTGATGCAACACTGGCG	60.28	20	278	4072	4349	TTTTTGGACCATTTTCTGGG	59.772	20	CTATTGATGCAACACTGGCG	60.28	20	198	4152	4349
F01_transcript_196	1	p1	(A)11	11	34	44	CGGTGGATAGGAAGGAATAGG	59.801	21	GGCAGGGAAAGCAATCAATA	60.038	20	275	2	276	CGGTGGATAGGAAGGAATAGG	59.801	21	CTGCCACATGCCGTTATCTA	59.712	20	136	2	137	CGGTGGATAGGAAGGAATAGG	59.801	21	GTCTGTTAGCTGCCACATGC	59.476	20	145	2	146
F01_transcript_201	1	p1	(A)10	10	2848	2857	TTGGCATTGCAATCTGGTAA	60.073	20	CTCCACTTGGGCAATTATGC	60.469	20	277	2816	3092	TTTGGCATTGCAATCTGGTA	60.073	20	CTCCACTTGGGCAATTATGC	60.469	20	278	2815	3092	TGGCATTGCAATCTGGTAAG	59.688	20	CTCCACTTGGGCAATTATGC	60.469	20	276	2817	3092
F01_transcript_201	2	p1	(T)16	16	3658	3673	GACTGCCCACTAACCGTCAT	59.997	20	TCGTGCAATATTTCAACCCC	60.701	20	256	3444	3699	CTTGACTGCCCACTAACCGT	60.171	20	TCGTGCAATATTTCAACCCC	60.701	20	259	3441	3699	TGTTGCTCGGATAAGAACCA	59.272	20	TCGTGCAATATTTCAACCCC	60.701	20	219	3481	3699
F01_transcript_205	1	p3	(TGC)6	18	4145	4162	AGCTCCTGCTGCTCTTCAAC	59.898	20	CAGCAATAGCAGACTCGCAG	59.911	20	108	4096	4203	AGCTCCTGCTGCTCTTCAAC	59.898	20	ACAGCAATAGCAGACTCGCA	59.77	20	109	4096	4204	GCTCCTGCTGCTCTTCAACT	59.898	20	ACAGCAATAGCAGACTCGCA	59.77	20	108	4097	4204
F01_transcript_213	1	p2	(AG)13	26	17	42	--
F01_transcript_213	2	p2	(TA)6	12	409	420	AGGCTGGCAGATTCATTCTT	58.889	20	GACGCTGAAATAATCGGCAT	60.067	20	275	293	567	TCTCCCTTCAACACTTTCCG	60.224	20	GCGACGGAAATACCAAATCT	59.046	20	276	248	523	AGGCTGGCAGATTCATTCTT	58.889	20	TCACCGGAGTTTCATTTTCC	59.91	20	252	293	544
F01_transcript_217	1	p2	(CT)6	12	103	114	CTGAAGCTATTGGCGTTGGT	60.27	20	CAAAATCCAGCTGAGCACAA	59.988	20	181	54	234	GAAGCTATTGGCGTTGGTTC	59.713	20	CAAAATCCAGCTGAGCACAA	59.988	20	179	56	234	ATTTACAAACGGAGAGGGGC	60.32	20	CAAAATCCAGCTGAGCACAA	59.988	20	202	33	234
F01_transcript_219	1	p2	(AG)14	28	74	101	GAGGCTTTTAGTCAGGCCAA	59.452	20	TGGCCCCTATTTTGCACTAC	59.96	20	154	45	198	GAGGCTTTTAGTCAGGCCAA	59.452	20	GGCCCCTATTTTGCACTACA	59.96	20	153	45	197	GAGGCTTTTAGTCAGGCCAA	59.452	20	CTGGCCCCTATTTTGCACTA	60.089	20	155	45	199
F01_transcript_219	2	p2	(TA)6	12	468	479	AGGCTGGCAGATTCATTCTT	58.889	20	GACGCTGAAATAATCGGCAT	60.067	20	275	352	626	TCTCCCTTCAACACTTTCCG	60.224	20	GCGACGGAAATACCAAATCT	59.046	20	276	307	582	AGGCTGGCAGATTCATTCTT	58.889	20	TCACCGGAGTTTCATTTTCC	59.91	20	252	352	603
F01_transcript_229	1	p2	(CT)15	30	10	39	--
F01_transcript_234	1	p3	(GAG)7	21	4082	4102	GTTCCGGTTCGTGTCAGATT	59.973	20	GGCCCAATGAAGACCTACCT	60.328	20	254	3941	4194	GTCAGATTTCAGCCGTCACA	59.837	20	GGCCCAATGAAGACCTACCT	60.328	20	242	3953	4194	GTGTCAGATTTCAGCCGTCA	59.837	20	GGCCCAATGAAGACCTACCT	60.328	20	244	3951	4194
F01_transcript_242	1	p3	(TGC)5	15	3875	3889	TGTGAATGGGTTTGGTGAGA	59.935	20	TGATCTGCTGAAAATTCCCC	60.014	20	225	3721	3945	GAGGAATGTGGGTTGGACTG	60.363	20	TGATCTGCTGAAAATTCCCC	60.014	20	254	3692	3945	GGCTGGCTGTGGTTAGAGAA	60.397	20	TGATCTGCTGAAAATTCCCC	60.014	20	123	3823	3945
F01_transcript_248	1	p1	(T)10	10	540	549	ATCTGAAGAGTTCCGGGGAT	59.896	20	AGCTTCATCCGCTCCTGATA	59.939	20	249	463	711	ATCTGAAGAGTTCCGGGGAT	59.896	20	GATTTCAGCTTCATCCGCTC	59.923	20	255	463	717	ATTCCTGCTTGTGGTGCTTT	59.74	20	AGCTTCATCCGCTCCTGATA	59.939	20	223	489	711
F01_transcript_248	2	c	(CAG)10catcaacaa(CAG)5	54	2648	2701	TGTTGGGGAAAACCAGTCTC	59.943	20	GGTGGTTGTTGCTGATGTTG	60.008	20	189	2553	2741	TGTTGGGGAAAACCAGTCTC	59.943	20	TGGTGGTTGTTGCTGATGTT	60.008	20	190	2553	2742	TGTTGGGGAAAACCAGTCTC	59.943	20	TCTCAACCAGTTGCTGTTGC	60.032	20	224	2553	2776
F01_transcript_256	1	p3	(CTC)6	18	194	211	TGAATCGTCTGCCCCTAATC	60.036	20	ATTTGCCCTTCAATTCATCG	59.901	20	134	107	240	CGATGGAACCTGAATCGTCT	60.073	20	ATTTGCCCTTCAATTCATCG	59.901	20	144	97	240	ATGGAACCTGAATCGTCTGC	60.081	20	ATTTGCCCTTCAATTCATCG	59.901	20	142	99	240
F01_transcript_256	2	p1	(T)12	12	4005	4016	TGGTCAAATCAATGCTCCAA	60.049	20	TGGCAGAAAAGCAAATAACCA	60.605	21	129	3932	4060	TGGTCAAATCAATGCTCCAA	60.049	20	GGCAGAAAAGCAAATAACCAA	59.244	21	128	3932	4059	CCGTGGAAAACAGCTCATCT	60.255	20	TGGCAGAAAAGCAAATAACCA	60.605	21	207	3854	4060
F01_transcript_257	1	p3	(AGT)5	15	241	255	GCGTCAGTTTCTTTGTGGGT	60.156	20	CCAATCCAGAAATCCTTCAAA	59.006	21	128	164	291	CCGTCGTTTCTAGATCTGCC	59.836	20	CCAATCCAGAAATCCTTCAAA	59.006	21	165	127	291	CCCGTCGTTTCTAGATCTGC	59.836	20	CCAATCCAGAAATCCTTCAAA	59.006	21	166	126	291
F01_transcript_258	1	p1	(T)12	12	4033	4044	TTTCAAGGCTGAGCAAACCT	59.993	20	ACAGACGGGGAAAGGAAGAT	59.935	20	135	3992	4126	ATGTTCGAGGATCGGACAAG	60.073	20	ACAGACGGGGAAAGGAAGAT	59.935	20	274	3853	4126	GTTTCAAGGCTGAGCAAACC	59.859	20	ACAGACGGGGAAAGGAAGAT	59.935	20	136	3991	4126
F01_transcript_259	1	p2	(TC)11	22	79	100	ACAGGAACGGCAAAGACAAG	60.291	20	CATTGGTCAACCGACAATGA	60.367	20	151	19	169	CAGGAACGGCAAAGACAAGT	60.291	20	CATTGGTCAACCGACAATGA	60.367	20	150	20	169	GCTTACAGGAACGGCAAAGA	60.386	20	CATTGGTCAACCGACAATGA	60.367	20	155	15	169
F01_transcript_261	1	p3	(AAG)6	18	74	91	GAGCTCCTGATCCTTGAACG	59.95	20	GAAGAGGGAGAAGGAGGTGG	60.186	20	180	51	230	CGAGCTCCTGATCCTTGAAC	59.95	20	AAGAGGGAGAAGGAGGTGGA	60.186	20	180	50	229	GAGCTCCTGATCCTTGAACG	59.95	20	AAGAGGGAGAAGGAGGTGGA	60.186	20	179	51	229
F01_transcript_261	2	p4	(GTTT)5	20	3939	3958	CAGTGGGTCACATGGAGATG	59.954	20	AAACCTATGTGAAAAAGAAGCCA	59.215	23	131	3856	3986	CCCGGTAGGGATGGTAAACT	60.068	20	AAACCTATGTGAAAAAGAAGCCA	59.215	23	259	3728	3986	CGAGGAAACTTCTGGGACAG	59.837	20	AAACCTATGTGAAAAAGAAGCCA	59.215	23	148	3839	3986
F01_transcript_266	1	p6	(GTAATG)6	36	4096	4131	--
F01_transcript_267	1	p3	(TTA)5	15	3297	3311	TAATTTGCGGAATTGGCTTC	60.04	20	TCCAATTACTTTGCTCTCCCTT	59.264	22	279	3105	3383	TTGCGGAATTGGCTTCTACT	59.845	20	TCCAATTACTTTGCTCTCCCTT	59.264	22	275	3109	3383	TTTGCGGAATTGGCTTCTAC	60.209	20	TCCAATTACTTTGCTCTCCCTT	59.264	22	276	3108	3383
F01_transcript_268	1	p3	(CAG)5	15	2602	2616	TGCTTCAAGCCCTTTGAGTT	59.993	20	GGAAGATGACCCAAAGCTGA	60.195	20	237	2408	2644	GTGCGTCCTCTTTCACCAAT	60.119	20	GGAAGATGACCCAAAGCTGA	60.195	20	152	2493	2644	ATCACAGCCACCCTGGATAG	59.95	20	TGCCACTGAAAGATGGTTTG	59.691	20	220	2546	2765
F01_transcript_270	1	p2	(TC)6	12	418	429	AATTTCTCCATCTTTCCCCC	59.219	20	TCTTCACCTGCCGATTATCC	60.036	20	135	395	529	AATTTCTCCATCTTTCCCCC	59.219	20	AGGGATGGGAAGAATTGGAC	60.133	20	168	395	562	AATTTCTCCATCTTTCCCCC	59.219	20	CCACCACCATCCTGTTTTTC	60.21	20	238	395	632
F01_transcript_275	1	p1	(T)10	10	4028	4037	GAAAGGTATGGCGAGTGTGG	60.517	20	ACTTGGCAACATAACCCTCG	59.993	20	259	3823	4081	TATGGCGAGTGTGGTAAAGC	58.799	20	ACTTGGCAACATAACCCTCG	59.993	20	253	3829	4081	TGGAGATGCATCAGTTTCACA	60.256	21	ACTTGGCAACATAACCCTCG	59.993	20	133	3949	4081
F01_transcript_276	1	c	(CAG)6catcaacaacaccac(CAG)5caacaacac(CAG)9	84	2724	2807	AGCAACAATTGCAGCATCAG	60.019	20	TGCTGAGAACGTACAGGTGG	59.897	20	181	2673	2853	CAACAGTCGCAGTCTCAAGC	59.776	20	TGGTGGTTGTTGCTGATGTT	60.008	20	246	2591	2836	GCAACAGTCGCAGTCTCAAG	59.776	20	TGGTGGTTGTTGCTGATGTT	60.008	20	247	2590	2836
F01_transcript_279	1	p1	(T)11	11	131	141	CGTTCCCTCTCTCTTTCACG	59.982	20	CCGTTAATGGCGCAGACTAT	60.117	20	193	32	224	CGTTCCCTCTCTCTTTCACG	59.982	20	CGTTAATGGCGCAGACTATG	59.349	20	192	32	223	CGTTCCCTCTCTCTTTCACG	59.982	20	TGGCTTGTTGCAGAGTGAGA	60.745	20	168	32	199
F01_transcript_279	2	p1	(T)10	10	4178	4187	--
F01_transcript_283	1	p1	(T)10	10	2112	2121	TGTTGATGACGTTTGCATGTT	60.027	21	TTTGATGATTTCCGAGGGAG	60.006	20	263	2014	2276	TGTTGATGACGTTTGCATGTT	60.027	21	TGATTTCCGAGGGAGTTTTG	60.044	20	258	2014	2271	TGTTGATGACGTTTGCATGTT	60.027	21	AGGGAGTTTTGCGAGGATTT	60.074	20	249	2014	2262
F01_transcript_287	1	p3	(ATG)6	18	3493	3510	TCAAATCCAGCAGAGCTCAA	59.673	20	GCTTCCTCAGCATTAGGCAC	59.985	20	245	3311	3555	TCAAATCCAGCAGAGCTCAA	59.673	20	CAATAAAACGGGCTTCCTCA	60.067	20	256	3311	3566	TCAAATCCAGCAGAGCTCAA	59.673	20	CGGGTAGACCATCCACTGTT	59.844	20	278	3311	3588
F01_transcript_289	1	c*	(T)10(TC)13*tatc(TA)14	67	85	151	CCTCTCTCACATACCCGCAT	60.096	20	AAGCCATAGGCTGAGTTTCG	59.476	20	236	50	285	TCTCTCACATACCCGCATCA	60.225	20	AAGCCATAGGCTGAGTTTCG	59.476	20	234	52	285	GTCCTCTCTCACATACCCGC	59.685	20	AAGCCATAGGCTGAGTTTCG	59.476	20	238	48	285
F01_transcript_289	2	p1	(T)10	10	2926	2935	CTCGGGCCTTAAACATACCA	59.953	20	AGGAAGGTTTCCCTGTGAAC	58.078	20	192	2842	3033	TCGGGCCTTAAACATACCAA	60.315	20	AGGAAGGTTTCCCTGTGAAC	58.078	20	191	2843	3033	CTCGGGCCTTAAACATACCA	59.953	20	TCCCTGTGAACACTAGAACGAA	59.774	22	183	2842	3024
F01_transcript_298	1	p1	(T)10	10	2234	2243	ACTAATTTGCTTGGCGTGCT	59.911	20	AGAGGTGAACCAGGCAAGTG	60.298	20	141	2136	2276	GGCATTGCTCCTGTTCTTTC	59.82	20	AGAGGTGAACCAGGCAAGTG	60.298	20	170	2107	2276	CTAATTTGCTTGGCGTGCTT	60.397	20	AGAGGTGAACCAGGCAAGTG	60.298	20	140	2137	2276
F01_transcript_299	1	p6	(TAATGG)5	30	4077	4106	--
F01_transcript_306	1	p3	(GCA)9	27	2663	2689	CTTCAGAATGGTGGGGAAAA	59.903	20	CTGTTGCTGCTGCAATTGAT	60.019	20	177	2567	2743	CTTCAGAATGGTGGGGAAAA	59.903	20	GCTGCTGCAATTGATGTTGT	59.878	20	172	2567	2738	CTTCAGAATGGTGGGGAAAA	59.903	20	GTTGCTGCTGCAATTGATGT	59.878	20	175	2567	2741
F01_transcript_320	1	p2	(GA)8	16	84	99	GACGGTATTTCATATTTGTTGGC	59.642	23	CCTCCACCCCATTTTACCTT	60.046	20	116	23	138	GACGGTATTTCATATTTGTTGGC	59.642	23	AACCTCCACCCCATTTTACC	59.919	20	118	23	140	GACGGTATTTCATATTTGTTGGC	59.642	23	AACAATTCAACGCGAAAAGG	60.11	20	165	23	187
F01_transcript_320	2	p3	(AGC)5	15	981	995	AGCCTGTATCCGTTCACACC	59.997	20	TCACACCTGGGTCATCAAGA	60.088	20	272	789	1060	ATTCATCGCACCCTCTTCAG	60.218	20	TCACACCTGGGTCATCAAGA	60.088	20	249	812	1060	CAAGCCTGTATCCGTTCACA	59.716	20	TCACACCTGGGTCATCAAGA	60.088	20	274	787	1060
F01_transcript_320	3	p1	(T)12	12	4011	4022	CGAGAGTGAGGGGATGTTGT	60.112	20	ATTCGCCTCCATGCAATAAT	59.397	20	280	3843	4122	CAGTTAGGGGGTGTGGGTAA	59.705	20	ATTCGCCTCCATGCAATAAT	59.397	20	191	3932	4122	GAGTGAGGGGATGTTGTTGG	60.363	20	ATTCGCCTCCATGCAATAAT	59.397	20	277	3846	4122
F01_transcript_321	1	c	(TC)13(TA)16	58	114	171	GCCAAATTCCCTTCCTCTTT	59.532	20	AATGGACCGATTGTTTGGAA	60.17	20	265	64	328	GCCAAATTCCCTTCCTCTTT	59.532	20	GAAGTCGAAGAATGGACCGA	60.195	20	275	64	338	GCCAAATTCCCTTCCTCTTT	59.532	20	AGAATGGACCGATTGTTTGG	59.79	20	267	64	330
F01_transcript_322	1	p3	(GCA)9	27	2587	2613	CTTCAGAATGGTGGGGAAAA	59.903	20	CTGTTGCTGCTGCAATTGAT	60.019	20	177	2491	2667	CTTCAGAATGGTGGGGAAAA	59.903	20	GCTGCTGCAATTGATGTTGT	59.878	20	172	2491	2662	CTTCAGAATGGTGGGGAAAA	59.903	20	GTTGCTGCTGCAATTGATGT	59.878	20	175	2491	2665
F01_transcript_326	1	p1	(T)10	10	429	438	TGATGTTCAGTCAAGGCTCTG	59.022	21	AATCGGACACCATCTTCGAG	60.073	20	250	321	570	CTGATGTTCAGTCAAGGCTCTG	60.051	22	AATCGGACACCATCTTCGAG	60.073	20	251	320	570	CACCCTTCTGATGTTCAGTCAA	60.149	22	AATCGGACACCATCTTCGAG	60.073	20	258	313	570
F01_transcript_326	2	p3	(CTG)5	15	3627	3641	CATCTGAATGCGCTGAAAAA	59.953	20	GCGCTCCTATATCCGTCTCA	60.339	20	269	3520	3788	CATCTGAATGCGCTGAAAAA	59.953	20	TCAGCGCTCCTATATCCGTC	60.339	20	272	3520	3791	CATCTGAATGCGCTGAAAAA	59.953	20	TGGAGCATAGCCAGACATGA	60.376	20	241	3520	3760
F01_transcript_329	1	p5	(GTTTC)6	30	3812	3841	TTGCTGTGGTGAAAAATGGA	60.088	20	ATGTATTGAGGAGGCGAGGA	59.653	20	188	3682	3869	TTGCTGTGGTGAAAAATGGA	60.088	20	TGTATTGAGGAGGCGAGGAG	60.353	20	187	3682	3868	TGCTGTGGTGAAAAATGGAG	59.691	20	ATGTATTGAGGAGGCGAGGA	59.653	20	187	3683	3869
F01_transcript_333	1	p3	(CAG)11	33	2614	2646	ACAGCAACATCAGCAGCAAC	60.064	20	TCCCATTTGAGTCCGAAAAG	60.044	20	260	2588	2847	ACATCAGCAGCAACAGCAAC	60.064	20	TCCCATTTGAGTCCGAAAAG	60.044	20	278	2570	2847	ACAGCAACAGCAACATCAGC	60.064	20	TCCCATTTGAGTCCGAAAAG	60.044	20	266	2582	2847
F01_transcript_334	1	p3	(CAG)5	15	606	620	CTCCGAACACAACTCAGCAA	60.025	20	CAATGTAACCTGGCGTTCCT	59.993	20	222	570	791	CTCCGAACACAACTCAGCAA	60.025	20	GCCCCTCCGAAAAGAATAAG	60.034	20	250	570	819	CTCCGAACACAACTCAGCAA	60.025	20	CCCTCCGAAAAGAATAAGCC	60.034	20	248	570	817
F01_transcript_340	1	p2	(AG)13	26	116	141	CCTCTCTGCGAGAAACAGACA	60.717	21	GCTCAAAGGAGACTTGCACC	59.997	20	201	53	253	CCTCTCTGCGAGAAACAGACA	60.717	21	ACGACGAGCTCGAGGTAGAA	60.156	20	115	53	167	CCTCTCTGCGAGAAACAGACA	60.717	21	CAAAGGAGACTTGCACCGAT	60.255	20	198	53	250
F01_transcript_341	1	p3	(GCA)5	15	3359	3373	GGGACCACAGTGAGCTCTTC	59.841	20	GAAAAACCAACAGGCAGGAG	59.711	20	233	3259	3491	GGGACCACAGTGAGCTCTTC	59.841	20	AGGATAAGCCACCACCCTTC	60.328	20	154	3259	3412	GGGACCACAGTGAGCTCTTC	59.841	20	GAGGATAAGCCACCACCCTT	60.328	20	155	3259	3413
F01_transcript_341	2	c	(CA)13(TA)8	42	3998	4039	GGAAGGGAAGTCTGCCTAATG	60.082	21	TGAGGGTTACTCTTATATGAACCAAA	59.4	26	272	3817	4088	GAGGAAGGGAAGTCTGCCTAA	59.835	21	TGAGGGTTACTCTTATATGAACCAAA	59.4	26	274	3815	4088	GATGAGGAAGGGAAGTCTGC	58.818	20	TGAGGGTTACTCTTATATGAACCAAA	59.4	26	277	3812	4088
F01_transcript_348	1	p2	(CT)7	14	46	59	TTTGGCTCCATTCTCTCTCC	59.361	20	TGGAATTGGTTGAGGCTTTC	60.051	20	257	15	271	TTTGGCTCCATTCTCTCTCC	59.361	20	AAGAACGACGGCAAGAGTGT	59.914	20	192	15	206	TTTGGCTCCATTCTCTCTCC	59.361	20	TCACCAAATGCTGAGGCATA	60.22	20	280	15	294
F01_transcript_349	1	p2	(AG)7	14	142	155	TTTTCTCCGCACGATAGAGT	57.575	20	ACGACGAGCTCGAGGTAGAA	60.156	20	165	17	181	TTTTCTCCGCACGATAGAGT	57.575	20	CTCAGGGTTGGAGAAACGAC	59.697	20	180	17	196	TTTTATTTTCTCCGCACGAT	57.401	20	CTCAGGGTTGGAGAAACGAC	59.697	20	185	12	196
F01_transcript_352	1	p6	(TATATC)5	30	212	241	CGGTGTCGGTGGAGAGTATT	59.989	20	CCTTAGCACCTCAAGATCCG	59.83	20	271	82	352	CGGTGTCGGTGGAGAGTATT	59.989	20	TAGCACCTCAAGATCCGACC	60.218	20	268	82	349	CGGTGTCGGTGGAGAGTATT	59.989	20	AGCCTCCCTCTTTCCATCTC	59.778	20	191	82	272
F01_transcript_354	1	p3	(TTA)5	15	491	505	GTTCCGTATTCGCTGCATTT	60.103	20	ACGAATGAATGTTCCGACAA	58.976	20	255	303	557	GTTCCGTATTCGCTGCATTT	60.103	20	AACGAATGAATGTTCCGACA	58.976	20	256	303	558	TCGCTGCATTTGTATTCGTC	59.839	20	ACGAATGAATGTTCCGACAA	58.976	20	246	312	557
F01_transcript_357	1	c	(A)11tctttgttgctgactttttgcaatgataagagaaagaactgtaccta(T)10	68	734	801	GCTCGGGTCTTTAAGCCTTT	59.856	20	CAATTTTTGAAGTTTGCGCT	58.097	20	262	566	827	GCTCGGGTCTTTAAGCCTTT	59.856	20	ACAATTTTTGAAGTTTGCGCT	58.935	21	263	566	828	GCTCGGGTCTTTAAGCCTTT	59.856	20	AACAATTTTTGAAGTTTGCGCT	60.167	22	264	566	829
F01_transcript_357	2	p2	(GT)6	12	955	966	TTTTTAGCGCAAACTTCAAAAA	59.116	22	TGCAACACTAGGCGAATCAG	60.011	20	255	803	1057	TTTTAGCGCAAACTTCAAAAA	57.859	21	TGCAACACTAGGCGAATCAG	60.011	20	254	804	1057	TTTTTAGCGCAAACTTCAAAA	57.859	21	TGCAACACTAGGCGAATCAG	60.011	20	255	803	1057
F01_transcript_361	1	p3	(AAG)6	18	75	92	CGAGCTCCTGATCCTTGAAC	59.95	20	CACTCTGGATCTGCGACAAA	59.984	20	280	51	330	GAGCTCCTGATCCTTGAACG	59.95	20	CACTCTGGATCTGCGACAAA	59.984	20	279	52	330	GAGCTCCTGATCCTTGAACG	59.95	20	GAAGAGGGAGAAGGAGGTGG	60.186	20	178	52	229
F01_transcript_361	2	p4	(GTTT)5	20	3918	3937	CAGTGGGTCACATGGAGATG	59.954	20	GGCTCCAAAATGAACATGAA	58.547	20	238	3836	4073	CGAGGAAACTTCTGGGACAG	59.837	20	GGCTCCAAAATGAACATGAA	58.547	20	255	3819	4073	GAAACTTCTGGGACAGTGGG	59.549	20	GGCTCCAAAATGAACATGAA	58.547	20	251	3823	4073
F01_transcript_383	1	p3	(CCA)7	21	3325	3345	GCGCTCTTGATGATACTCCC	59.803	20	GGAGTGGAAGGCAAAAATGA	60.051	20	256	3292	3547	GGCGCTCTTGATGATACTCC	59.803	20	GGAGTGGAAGGCAAAAATGA	60.051	20	257	3291	3547	GCGCTCTTGATGATACTCCC	59.803	20	CCCAGGCAAGACCATAGGTA	59.948	20	278	3292	3569
F01_transcript_386	1	p2	(AG)9	18	195	212	CAAATCGTTTTCTCCCCAAA	59.91	20	CGGATCGAACTTGCTTATGG	60.597	20	225	79	303	CAAAAACCGAACCAAATCGT	59.839	20	CGGATCGAACTTGCTTATGG	60.597	20	237	67	303	AACCAAATCGTTTTCTCCCC	60.166	20	CGGATCGAACTTGCTTATGG	60.597	20	228	76	303
F01_transcript_386	2	p1	(A)10	10	1181	1190	TATAGCGATGGAAGGATGGC	60.023	20	CCTGATCCCCTAATGCAAGA	60.029	20	239	1047	1285	CAAGATGGGCTTGGAATTGT	59.933	20	CCTGATCCCCTAATGCAAGA	60.029	20	208	1078	1285	AGATGGGCTTGGAATTGTTG	59.933	20	CCTGATCCCCTAATGCAAGA	60.029	20	206	1080	1285
F01_transcript_386	3	p1	(T)10	10	3562	3571	TCACTTTGCAGCAGTGGTTC	60.032	20	GCGAGACAACCTCCAACAAT	60.119	20	154	3446	3599	TTGTGGCTGTACTCTCGTGC	60.056	20	GCGAGACAACCTCCAACAAT	60.119	20	235	3365	3599	TCACTTTGCAGCAGTGGTTC	60.032	20	GGCTTCAGCATTACCGTCTC	59.843	20	217	3446	3662
F01_transcript_392	1	p2	(AT)6	12	184	195	AAAATGGCATTAACCATCGG	59.66	20	GAGTGTTTTTGCTGAAGTGGG	59.766	21	132	99	230	AAAATGGCATTAACCATCGG	59.66	20	TGTTTTTGCTGAAGTGGGTTT	59.64	21	129	99	227	AAAATGGCATTAACCATCGG	59.66	20	TGTTTTTGCTGAAGTGGGTT	58.256	20	129	99	227
F01_transcript_393	1	p3	(CAG)6	18	1552	1569	TACAGACAATGCGAGGCTTG	60.011	20	AGTTGCTGTTGTTGCTGGTG	59.946	20	249	1453	1701	TGGAACCCCAACATTCTGAT	60.173	20	AGTTGCTGTTGTTGCTGGTG	59.946	20	216	1486	1701	ATGGAACCCCAACATTCTGA	60.173	20	AGTTGCTGTTGTTGCTGGTG	59.946	20	217	1485	1701
F01_transcript_393	2	p3	(CAG)7	21	2646	2666	CTTCAGGGTTTCACGGTCAT	59.966	20	GTTGCATTGCAGTTGTCTGG	60.31	20	117	2607	2723	TACAGCCGAGAAATTGGGAC	60.074	20	GTTGCATTGCAGTTGTCTGG	60.31	20	182	2542	2723	ACCGGACCTATGGAGAGCTT	60.096	20	GTTGCATTGCAGTTGTCTGG	60.31	20	164	2560	2723
F01_transcript_394	1	p1	(A)10	10	3894	3903	AAACTGTGGTCGATCTTGCC	60.119	20	CCAAGGATGGAACCAAAAAG	59.401	20	178	3773	3950	AAACTGTGGTCGATCTTGCC	60.119	20	TCCTCCCAAATCCAGGAAAT	60.632	20	241	3773	4013	AAACTGTGGTCGATCTTGCC	60.119	20	ACCAAGGATGGAACCAAAAA	59.264	20	179	3773	3951
F01_transcript_395	1	p2	(AT)6	12	1221	1232	AACAACCATTAGATTGCCACG	59.875	21	TTTTGGGCTATAGTGACGGG	59.953	20	244	1126	1369	AACAACCATTAGATTGCCACG	59.875	21	CTATTCTGGGCTATGGCGAC	59.691	20	208	1126	1333	AACAACCATTAGATTGCCACG	59.875	21	GTCGCCATAGCTATTCTGGG	59.691	20	218	1126	1343
F01_transcript_395	2	p2	(AT)7	14	1441	1454	CCCGTCACTATAGCCCAAAA	59.953	20	AAGGTCGACTGCTCTGCTTC	59.751	20	262	1350	1611	CCCGTCACTATAGCCCAAAA	59.953	20	GGTCGACTGCTCTGCTTCTC	60.292	20	260	1350	1609	TAGCTATGGCGACGGGTTAC	60.117	20	GGTCGACTGCTCTGCTTCTC	60.292	20	279	1331	1609
F01_transcript_395	3	p3	(CAG)5	15	3223	3237	TGACGATGATGAGTGGAAGG	59.631	20	ATTCTCGACAGCATTCACCC	60.081	20	247	3078	3324	GGTAGAGGATCCTTTGGCGT	60.464	20	ATTCTCGACAGCATTCACCC	60.081	20	222	3103	3324	ACGATGATGAGTGGAAGGGA	60.475	20	ATTCTCGACAGCATTCACCC	60.081	20	245	3080	3324
F01_transcript_395	4	p3	(GCT)8	24	3761	3784	GTCGAGCAATGACAAAAGCA	59.995	20	AAAGAACACCACGTCAAGGC	60.156	20	155	3672	3826	GCAAGTCGAGCAATGACAAA	59.995	20	AAAGAACACCACGTCAAGGC	60.156	20	159	3668	3826	TGCACTTGGAACAGCAAGTC	60.032	20	AAAGAACACCACGTCAAGGC	60.156	20	172	3655	3826
F01_transcript_396	1	p3	(AGT)5	15	240	254	GACTCGGACAGATCCACCAC	60.537	20	ACCGCACACAACTATCACCA	60.032	20	264	207	470	TAAAGGATCGGACTCGGACA	60.594	20	ACCGCACACAACTATCACCA	60.032	20	274	197	470	GACTCGGACAGATCCACCAC	60.537	20	CCCTAGAAAATCTGACCGCA	60.206	20	278	207	484
F01_transcript_411	1	p4	(AGGC)8	32	3826	3857	CCTTCTTTGGGTGGCAATTA	59.931	20	TGCAAAATCCGCTTCACATA	60.215	20	280	3626	3905	GAGATTGGAGGCTCATTCCA	60.158	20	TGCAAAATCCGCTTCACATA	60.215	20	240	3666	3905	AATTAATCCACCACAAGGCG	59.823	20	TGCAAAATCCGCTTCACATA	60.215	20	265	3641	3905
F01_transcript_415	1	p3	(AGC)5	15	3669	3683	CAAAGTGGAAAGCTCGGAAG	59.986	20	AAGGGTTGAGCCGTCCTAAT	59.962	20	161	3565	3725	GTGTCCCCATTTTGTGCTCT	59.973	20	AAGGGTTGAGCCGTCCTAAT	59.962	20	132	3594	3725	AGTGTCCCCATTTTGTGCTC	59.973	20	AAGGGTTGAGCCGTCCTAAT	59.962	20	133	3593	3725
F01_transcript_422	1	c	(A)10gaaagggaaaaagacggagctgagcatt(GAA)9	65	7	71	--
F01_transcript_432	1	p1	(A)10	10	3916	3925	--
F01_transcript_435	1	p1	(T)10	10	3880	3889	GATGAAAGTGTTGGCTGGGT	59.973	20	AAGAAAAGAAGAGCCGGAGC	60.096	20	279	3667	3945	AGTGGGAATCGCTGTATTGG	59.955	20	AAGAAAAGAAGAGCCGGAGC	60.096	20	226	3720	3945	ATCGCTGTATTGGGTTCCTG	59.955	20	AAGAAAAGAAGAGCCGGAGC	60.096	20	219	3727	3945
F01_transcript_436	1	c	(TC)6c(CT)6	25	216	240	CATTTCCTCCAAAACCCAGA	59.903	20	CGGCAGAAGAAAAGAAGCAG	60.262	20	280	53	332	TTTCCTCCAAAACCCAGAAA	59.518	20	CGGCAGAAGAAAAGAAGCAG	60.262	20	278	55	332	CATTTCCTCCAAAACCCAGA	59.903	20	AGATTTCGATCTGCTGGGC	60.319	19	262	53	314
F01_transcript_438	1	p2	(AT)15	30	224	253	CCAGCGAGGCTCTAACTCAC	60.156	20	TCAAACAAGAAATTAAGAGCTTTGG	60.161	25	267	158	424	CCAGCGAGGCTCTAACTCAC	60.156	20	CAAACAAGAAATTAAGAGCTTTGG	58.616	24	266	158	423	CAGCGAGGCTCTAACTCACA	59.339	20	TCAAACAAGAAATTAAGAGCTTTGG	60.161	25	266	159	424
F01_transcript_449	1	p2	(TC)6	12	95	106	CCACCACCATCTCCTTTTCT	58.989	20	GAAAGCTTGATTGCAAAGGC	59.967	20	107	28	134	CACCACCATCTCCTTTTCTGA	60.096	21	GAAAGCTTGATTGCAAAGGC	59.967	20	106	29	134	CCACCACCATCTCCTTTTCT	58.989	20	TTTGTTCCCAAATCGAAACC	59.778	20	225	28	252
F01_transcript_451	1	p2	(TC)6	12	48	59	AAAGACAAGGGTTTTGCCCT	59.976	20	CTCCTCTTCCTTGCCATGAG	59.943	20	272	16	287	AAGGGTTTTGCCCTCATTCT	59.94	20	CTCCTCTTCCTTGCCATGAG	59.943	20	266	22	287	AAAGACAAGGGTTTTGCCCT	59.976	20	ACGACTCAAAATCAAACCGC	60.118	20	250	16	265
F01_transcript_452	1	p1	(T)10	10	3910	3919	--
F01_transcript_455	1	p1	(A)10	10	1170	1179	TATAGCGATGGAAGGATGGC	60.023	20	CCTGATCCCCTAATGCAAGA	60.029	20	239	1036	1274	TATAGCGATGGAAGGATGGC	60.023	20	TTTTTGCCTGAACCCATTTC	59.916	20	181	1036	1216	TATAGCGATGGAAGGATGGC	60.023	20	GACCTGATCCCCTAATGCAA	59.894	20	241	1036	1276
F01_transcript_458	1	p3	(GAA)6	18	340	357	CCAATTCCAGCTTCACCACT	60.111	20	ATCGATTCCTCCTTTTCCGT	59.903	20	259	237	495	TCAACCTCGTCTTTGTTCCC	60.088	20	CAATTCGTACTGAGGTCGCA	59.864	20	277	128	404	CCAATTCCAGCTTCACCACT	60.111	20	CAATTCGTACTGAGGTCGCA	59.864	20	168	237	404
F01_transcript_458	2	p3	(AGA)5	15	461	475	CCAATTCCAGCTTCACCACT	60.111	20	ATCGATTCCTCCTTTTCCGT	59.903	20	259	237	495	TCAACCTCGTCTTTGTTCCC	60.088	20	CAATTCGTACTGAGGTCGCA	59.864	20	277	128	404	CCAATTCCAGCTTCACCACT	60.111	20	CAATTCGTACTGAGGTCGCA	59.864	20	168	237	404
F01_transcript_459	1	p2	(AG)8	16	14	29	--
F01_transcript_470	1	p2	(TA)23	46	99	144	GCCATACCTTTCATTTCCCTC	59.791	21	CCCAACTGTTCTTTCCCTTTT	59.486	21	184	49	232	GCCATACCTTTCATTTCCCTC	59.791	21	GACCCAACTGTTCTTTCCCTT	59.47	21	186	49	234	TGAGATGAGGGATAAAAGCCA	59.654	21	GACCCAACTGTTCTTTCCCTT	59.47	21	203	32	234
F01_transcript_476	1	p3	(GAT)5	15	3259	3273	GAGGGTGGATGGGAATTTTT	59.996	20	TCTCTGTCTGCATTGGTTGC	59.992	20	248	3147	3394	GAGGGTGGATGGGAATTTTT	59.996	20	CCTCGTCTTCGTCAGACTCC	59.986	20	163	3147	3309	AAGACGATCGTTGATGACCC	59.934	20	CCTCGTCTTCGTCAGACTCC	59.986	20	199	3111	3309
F01_transcript_482	1	p2	(TA)16	32	102	133	CTTCAATCCCGTTTTCTCCA	60.044	20	GTGATCGTCGGACTGGAAAT	59.934	20	268	56	323	CGTTTTCTCCAGATCCCAAA	60.044	20	GTGATCGTCGGACTGGAAAT	59.934	20	259	65	323	CGTTTTCTCCAGATCCCAAA	60.044	20	GCTACCCATAATTGCCGAAA	59.928	20	109	65	173
F01_transcript_484	1	p1	(T)23	23	347	369	TGGCTTCTGATGTCCCTTTT	59.67	20	ATTACCAGAGCCCCAATTCC	60.152	20	158	275	432	GGCTTCTGATGTCCCTTTTG	59.67	20	ATTACCAGAGCCCCAATTCC	60.152	20	157	276	432	GGCTTCTGATGTCCCTTTTG	59.67	20	AGCCCCAATTCCTAAGAACG	60.443	20	149	276	424
F01_transcript_485	1	p3	(GTG)5	15	182	196	CCTAACGCCACGCACTTTAT	60.152	20	CTCTACCTCTCCCTCTCCCG	60.341	20	183	64	246	ACCTCAAACCCTTCCCAAAC	60.204	20	CTGACCGTGATGATGTTGCT	59.707	20	252	102	353	ACCTCAAACCCTTCCCAAAC	60.204	20	CTCTACCTCTCCCTCTCCCG	60.341	20	145	102	246
F01_transcript_493	1	p1	(T)13	13	169	181	ACGGCTTTTCCAATTTTCCT	59.945	20	TAGCTCCTCCGACGATTCTC	59.532	20	245	103	347	ACGGCTTTTCCAATTTTCCT	59.945	20	CTCTCTCCGGCTTGATCCTA	59.526	20	228	103	330	ACGGCTTTTCCAATTTTCCT	59.945	20	AGCTCCTCCGACGATTCTCT	60.498	20	244	103	346
F01_transcript_493	2	p1	(T)11	11	3703	3713	GTCAAGAGGTGGGTGAGGAA	60.088	20	TGCATATTACAGAAACAATTTGGC	60.253	24	265	3506	3770	GTACGTGGTCGGCTTAGCAT	60.162	20	TGCATATTACAGAAACAATTTGGC	60.253	24	206	3565	3770	TACGGGTGAGCTTGTACGTG	59.781	20	TGCATATTACAGAAACAATTTGGC	60.253	24	219	3552	3770
F01_transcript_495	1	p1	(A)15	15	153	167	TGCCAGAGAAAAGAGGTGCT	60.134	20	TGACATAGTTCCTCCTCCCG	60.065	20	161	129	289	TGCCAGAGAAAAGAGGTGCT	60.134	20	TATCCCCAAGTACTCCAGCG	60.088	20	140	129	268	TGCCAGAGAAAAGAGGTGCT	60.134	20	CAAGTTCCCGACTCAACGAT	60.111	20	180	129	308
F01_transcript_503	1	p2	(AG)7	14	27	40	TCAAGTGGAAGGAGAAGTTGAA	58.955	22	GCCACCAATCCAGAATTAGC	59.533	20	280	2	281	TCAAGTGGAAGGAGAAGTTGAA	58.955	22	CCACCAATCCAGAATTAGCC	59.387	20	279	2	280	TCAAGTGGAAGGAGAAGTTGA	57.501	21	GCCACCAATCCAGAATTAGC	59.533	20	280	2	281
F01_transcript_511	1	p2	(TC)6	12	96	107	CCACCACCATCTCCTTTTCT	58.989	20	GAAAGCTTGATTGCAAAGGC	59.967	20	107	29	135	CACCACCATCTCCTTTTCTGA	60.096	21	GAAAGCTTGATTGCAAAGGC	59.967	20	106	30	135	CCACCACCATCTCCTTTTCT	58.989	20	TTTGTTCCCAAATCGAAACC	59.778	20	225	29	253
F01_transcript_512	1	p2	(CT)6	12	61	72	AGACGAGAAGAAAGCCGTCA	60.134	20	AGACTGAAACCGCGAGAAAA	59.993	20	226	16	241	GACGAGAAGAAAGCCGTCAG	60.134	20	AGACTGAAACCGCGAGAAAA	59.993	20	225	17	241	ACGAGAAGAAAGCCGTCAGA	60.134	20	AGACTGAAACCGCGAGAAAA	59.993	20	224	18	241
F01_transcript_512	2	p2	(TA)16	32	3705	3736	ACCAAATGTCCAACTCCTGC	59.973	20	TGATGCATCTTCCCTTTTCC	60.014	20	244	3608	3851	ACCAAATGTCCAACTCCTGC	59.973	20	GATGCATCTTCCCTTTTCCA	60.014	20	243	3608	3850	GGAGCCTAACCAAATGTCCA	59.933	20	GATGCATCTTCCCTTTTCCA	60.014	20	251	3600	3850
F01_transcript_514	1	p2	(CT)6	12	2291	2302	TTCTTGAAGCCCTGTCCAAT	59.67	20	AACAGAGGGCAGTGCAAAAT	59.74	20	207	2267	2473	CTTCTTGAAGCCCTGTCCAA	60.366	20	AACAGAGGGCAGTGCAAAAT	59.74	20	208	2266	2473	CTTCTTGAAGCCCTGTCCAA	60.366	20	ATCAGAGCAGCAACTGGACC	60.418	20	254	2266	2519
F01_transcript_525	1	p2	(AG)6	12	119	130	ACCTTCTGGAAGCGTAAGCA	60.015	20	GCAACGAGTCGAGACTAGGG	60.012	20	115	54	168	TTCCAGGATCCATCCACTTC	59.862	20	GCAACGAGTCGAGACTAGGG	60.012	20	146	23	168	ACCTTCTGGAAGCGTAAGCA	60.015	20	ATCTCCATTCGCAACGAGTC	60.226	20	125	54	178
F01_transcript_525	2	p3	(ATG)5	15	320	334	CCCTAGTCTCGACTCGTTGC	60.012	20	GGTTATCAACGTCACCAGGG	60.232	20	236	149	384	CCCTAGTCTCGACTCGTTGC	60.012	20	GGGTTATCAACGTCACCAGG	60.232	20	237	149	385	CCCTAGTCTCGACTCGTTGC	60.012	20	CAAGGATACCGGAGAGGGTT	60.319	20	252	149	400
F01_transcript_544	1	p1	(A)14	14	1629	1642	TCATGGAGCATAGGTCATGATA	58.065	22	GCAAGGACAGCTCCTGATTC	59.957	20	278	1517	1794	TCATGGAGCATAGGTCATGATAC	58.944	23	GCAAGGACAGCTCCTGATTC	59.957	20	278	1517	1794	TCATGGAGCATAGGTCATGATA	58.065	22	TTTTCCTTTTCCCAGCTCCT	60.18	20	236	1517	1752
F01_transcript_545	1	p3	(AGA)5	15	110	124	GGGTTTCAGCTTTTAGGGCT	59.725	20	ATGGTGATTTTTCCTTCCCC	59.996	20	268	83	350	AGGGTTTCAGCTTTTAGGGC	59.725	20	ATGGTGATTTTTCCTTCCCC	59.996	20	269	82	350	CACCAGTTCCAGGGTTTCAG	60.536	20	ATGGTGATTTTTCCTTCCCC	59.996	20	279	72	350
F01_transcript_557	1	p1	(T)10	10	65	74	TCGGAGTACTCATTCACGCA	60.413	20	TCGAACAAGCTCACCTTCCT	59.989	20	214	26	239	TCGGAGTACTCATTCACGCA	60.413	20	CATCCACCACATCGAACAAG	59.96	20	225	26	250	TCGGAGTACTCATTCACGCA	60.413	20	ATCATCCACCACATCGAACA	59.769	20	227	26	252
F01_transcript_559	1	p1	(T)10	10	3642	3651	GCCCTGGAACAAAAATCTGA	60.051	20	AGAAAGAAACCAAACACCCG	59.073	20	251	3431	3681	GCCCTGGAACAAAAATCTGA	60.051	20	GAAAGAAACCAAACACCCGT	58.934	20	250	3431	3680	GCCCTGGAACAAAAATCTGA	60.051	20	AGAAAGAAACCAAACACCCGT	59.893	21	251	3431	3681
F01_transcript_561	1	p2	(AG)7	14	3657	3670	CCTGGCATTTGCTCTTCTTC	59.955	20	GGCAGTTTGTTCGGATCATT	59.939	20	268	3561	3828	TCCTGGCATTTGCTCTTCTT	59.955	20	GGCAGTTTGTTCGGATCATT	59.939	20	269	3560	3828	TTCCTGGCATTTGCTCTTCT	59.955	20	GGCAGTTTGTTCGGATCATT	59.939	20	270	3559	3828
F01_transcript_564	1	p4	(GCCA)5	20	302	321	CTTCTCTTTCCTGTGCCTGC	60.134	20	TGTGGTAACACAGTTCCCGA	60.001	20	237	195	431	CTTCTCTTTCCTGTGCCTGC	60.134	20	CAGGAAAGTGGAAATTGGGA	59.903	20	156	195	350	TGCCTGCTTTTCTTGTAGCA	59.752	20	TGTGGTAACACAGTTCCCGA	60.001	20	220	212	431
F01_transcript_566	1	p3	(TAA)9	27	196	222	CCAGCCTTCCTTTCCTTTTC	60.18	20	GCGAATTCAAAAGCGAGAAC	59.967	20	236	159	394	CCAGCCTTCCTTTCCTTTTC	60.18	20	ACCACTAATTCGATGTCGGC	59.962	20	254	159	412	GTCGACCATGTGTATCGGTG	59.837	20	CCGGCGTAACTGGCTATAAA	60.109	20	176	83	258
F01_transcript_566	2	p3	(CTG)5	15	3601	3615	CATGGCTTCCATCTCCAGTT	60.073	20	ACCGTCAGCATTTCGGTATT	59.457	20	176	3543	3718	CCAAACTGGTGGCAGTTCTT	60.149	20	ACCGTCAGCATTTCGGTATT	59.457	20	196	3523	3718	TCTTCATGGCTTCCATCTCC	60.158	20	ACCGTCAGCATTTCGGTATT	59.457	20	180	3539	3718
F01_transcript_576	1	p3	(TGA)6	18	3020	3037	AGATCTGGACCCTCACCCAT	60.737	20	GCTGAGATGAAACCCTACCG	59.694	20	157	2990	3146	GAACTCCTATTCCCGTTGGC	60.826	20	GATGAGGTAGAGTTGCCGGA	60.218	20	163	2958	3120	ATCTGGACCCTCACCCATTA	59.213	20	GCTGAGATGAAACCCTACCG	59.694	20	155	2992	3146
F01_transcript_576	2	p3	(ATG)8	24	3292	3315	TGGAAATCAAGCATGGAACA	60.049	20	CCCCTACTTGCTGGGACATA	59.948	20	203	3265	3467	GGACTTGGCAGGACAAGAGA	60.386	20	CCCCTACTTGCTGGGACATA	59.948	20	234	3234	3467	TGGGCAAACTGGACATAGTG	59.566	20	CCCCTACTTGCTGGGACATA	59.948	20	266	3202	3467
F01_transcript_600	1	c	(ACG)9aaccaggaaaggcggaaagaggaaaattgaaagcaggaacaagaaatatgcatactgcgaccaaaccctaatcctcggcaagattcgtccctcat(TC)6	134	32	165	GAAGAAAGAGAGACAGAGAGCCA	59.402	23	AGGCTTGGCTAAGGAATGAA	58.928	20	263	6	268	GAAGAAAGAGAGACAGAGAGCCA	59.402	23	ATGAAGGCTTGGCTAAGGAA	58.928	20	267	6	272	GAAGAAAGAGAGACAGAGAGCCA	59.402	23	AAGGCTTGGCTAAGGAATGA	58.928	20	264	6	269
F01_transcript_600	2	p1	(T)10	10	3647	3656	TGGATTTGTATTGCCGGTTT	60.188	20	GACCAGGCTGCTGATGAAAT	60.226	20	218	3510	3727	GATGGATTTGTATTGCCGGT	59.651	20	GACCAGGCTGCTGATGAAAT	60.226	20	220	3508	3727	TGGATTTGTATTGCCGGTTT	60.188	20	AACGTTAAAGACCAGGCTGC	59.383	20	227	3510	3736
F01_transcript_602	1	p1	(T)10	10	298	307	TCAAACCTACAGCGTACGGA	59.342	20	GGGTACAGCTTTGATTTGGG	59.429	20	251	113	363	TCAAACCTACAGCGTACGGA	59.342	20	TCCTCTTTCGGGTACAGCTT	58.934	20	260	113	372	TTCTCCAACAATCTTGCATCA	59.262	21	AATTAGCATTTGGGAACCCC	60.02	20	185	265	449
F01_transcript_602	2	p1	(T)10	10	3573	3582	CATCATCATGCTGGTATGGC	59.914	20	AAGATAAAAATGGCAGGCCC	60.28	20	118	3543	3660	CATCATCATGCTGGTATGGC	59.914	20	CAGGCCCTAGCTGTGTTGTT	60.312	20	105	3543	3647	AGCAAAACAGGCTGGAAGAG	59.615	20	AAGATAAAAATGGCAGGCCC	60.28	20	257	3404	3660
F01_transcript_603	1	p2	(TC)7	14	29	42	TTTGTGTGAAGATTTCTTATCTGG	57.521	24	CAGGACCCAATAACTCGGAA	59.926	20	277	2	278	TTTGTGTGAAGATTTCTTATCTGG	57.521	24	CGGCAGAAGAAAAGAAGCAG	60.262	20	135	2	136	GTTTGTGTGAAGATTTCTTATCTGG	58.329	25	CAGGACCCAATAACTCGGAA	59.926	20	278	1	278
F01_transcript_606	1	p2	(CT)7	14	37	50	CATTTCTCACGAAATCTCTCTCC	59.362	23	GGAGCTCTGGAGTGCAAAAG	60.134	20	246	11	256	CATTTCTCACGAAATCTCTCTCC	59.362	23	GTCCCTAGGGTTTCGGGTTA	60.18	20	116	11	126	CATTTCTCACGAAATCTCTCTCC	59.362	23	TCCCTAGGGTTTCGGGTTAT	59.661	20	115	11	125
F01_transcript_616	1	c	(T)10cctttcccaatttatttagtttgtgatagcgtttcatctgtccaacgtatttattgagagatgagaaacattaagacttggattggagaattatg(T)14	119	3561	3679	TCGGCCATATCATGTGTATCA	59.784	21	ACTGCAATTCAACATGGCAA	60.119	20	257	3512	3768	CGGCCATATCATGTGTATCAA	59.271	21	ACTGCAATTCAACATGGCAA	60.119	20	256	3513	3768	ATGTGAGACTTTATCGGCCA	58.173	20	ACTGCAATTCAACATGGCAA	60.119	20	270	3499	3768
F01_transcript_618	1	p1	(T)11	11	2576	2586	ACTAGCAATTTTTGGTGGCG	60.131	20	GACCCGGTCAATCTGTCATC	60.335	20	204	2462	2665	TGAAGTGGATGTGGTGGTTG	60.416	20	GACCCGGTCAATCTGTCATC	60.335	20	180	2486	2665	AAGTGGATGTGGTGGTTGCT	60.431	20	GACCCGGTCAATCTGTCATC	60.335	20	178	2488	2665
F01_transcript_619	1	p2	(TC)11	22	209	230	ATAGCTCCCCTACAAACGCA	59.73	20	CCCATAATTCTGCCCTCCTT	60.278	20	168	171	338	TAGCTCCCCTACAAACGCAT	59.73	20	CCCATAATTCTGCCCTCCTT	60.278	20	167	172	338	CCTACAAACGCATTGGCTCT	60.27	20	CCCATAATTCTGCCCTCCTT	60.278	20	160	179	338
F01_transcript_622	1	p3	(CTG)5	15	3482	3496	GCCCTGGAACAAAAATCTGA	60.051	20	AGAAACAAACCAAACACCCG	59.869	20	257	3442	3698	GCCCTGGAACAAAAATCTGA	60.051	20	GAAACAAACCAAACACCCGT	59.734	20	256	3442	3697	GCCCTGGAACAAAAATCTGA	60.051	20	GCAGCCCATCTAGGAAAGAA	59.41	20	191	3442	3632
F01_transcript_622	2	p1	(T)10	10	3659	3668	GCCCTGGAACAAAAATCTGA	60.051	20	AGAAACAAACCAAACACCCG	59.869	20	257	3442	3698	GCCCTGGAACAAAAATCTGA	60.051	20	GAAACAAACCAAACACCCGT	59.734	20	256	3442	3697	GCCCTGGAACAAAAATCTGA	60.051	20	GCAGCCCATCTAGGAAAGAA	59.41	20	191	3442	3632
F01_transcript_623	1	p2	(TC)6	12	61	72	AAAGACAAGGGTTTTGCCCT	59.976	20	CTCCTCTTCCTTGCCATGAG	59.943	20	176	29	204	AAGGGTTTTGCCCTCATTCT	59.94	20	CTCCTCTTCCTTGCCATGAG	59.943	20	170	35	204	AAAGACAAGGGTTTTGCCCT	59.976	20	ACGACTCAAAATCAAACCGC	60.118	20	154	29	182
F01_transcript_633	1	p2	(TC)6	12	264	275	GGGCCTCTCCATCTGTCATA	60.034	20	TAGAATGCGCAGAAATTGCC	61.237	20	157	156	312	AACTTTCAGGGCCTCTCCAT	60.074	20	TAGAATGCGCAGAAATTGCC	61.237	20	165	148	312	GGGCCTCTCCATCTGTCATA	60.034	20	GCTCACAAACAATGTGTGCAT	59.636	21	278	156	433
F01_transcript_641	1	p3	(ATG)5	15	301	315	GACTCGTTGCGAATGGAGAT	60.226	20	TGATGCTTCCACTACAAGCG	60.011	20	262	140	401	GACTCGTTGCGAATGGAGAT	60.226	20	GGTTATCAACGTCACCAGGG	60.232	20	226	140	365	GACTCGTTGCGAATGGAGAT	60.226	20	GGGTTATCAACGTCACCAGG	60.232	20	227	140	366
F01_transcript_643	1	p3	(ATG)5	15	233	247	GACTCGTTGCGAATGGAGAT	60.226	20	TGATGCTTCCACTACAAGCG	60.011	20	262	72	333	GACTCGTTGCGAATGGAGAT	60.226	20	GGTTATCAACGTCACCAGGG	60.232	20	226	72	297	GACTCGTTGCGAATGGAGAT	60.226	20	GGGTTATCAACGTCACCAGG	60.232	20	227	72	298
F01_transcript_650	1	p1	(T)10	10	3524	3533	ACGTAGCAGGCAAGGTTACG	60.326	20	ACAGGCTACGGAGTCCTTGA	59.867	20	275	3306	3580	ACGTAGCAGGCAAGGTTACG	60.326	20	CAGGCTACGGAGTCCTTGAA	60.388	20	274	3306	3579	CCAGCACACTCGGTTATTTG	59.195	20	ACAGGCTACGGAGTCCTTGA	59.867	20	227	3354	3580
F01_transcript_653	1	c	(TC)21(TA)20	82	253	334	AAAGAAGGTCCAAGGGGATG	60.298	20	TTCTTTGCAGTTGCATGGTC	59.847	20	248	174	421	AAAGAAGGTCCAAGGGGATG	60.298	20	AGTTGCATGGTCCAGTGGTT	60.431	20	240	174	413	GCTACCCAGCTAAGCTTCCA	59.615	20	AGTTGCATGGTCCAGTGGTT	60.431	20	276	138	413
F01_transcript_653	2	p1	(A)10	10	1658	1667	GCTGGTGTTCCAACCTCAAT	59.973	20	TGAACTCCTCCTCCTCCTCA	59.913	20	212	1614	1825	GCACTTGGGAAGAGAAGCAC	59.997	20	CTTGATGATCCCCATGAAGG	60.272	20	160	1551	1710	TTCTCATGCTGGTGTTCCAA	60.24	20	TGAACTCCTCCTCCTCCTCA	59.913	20	219	1607	1825
F01_transcript_653	3	p3	(GAG)5	15	1808	1822	GCTGGTGTTCCAACCTCAAT	59.973	20	TGAACTCCTCCTCCTCCTCA	59.913	20	212	1614	1825	GCACTTGGGAAGAGAAGCAC	59.997	20	CTTGATGATCCCCATGAAGG	60.272	20	160	1551	1710	TTCTCATGCTGGTGTTCCAA	60.24	20	TGAACTCCTCCTCCTCCTCA	59.913	20	219	1607	1825
F01_transcript_654	1	p2	(TA)19	38	2448	2485	CCAAAGTGGATTTGTTGCCT	59.971	20	CTCCTCCAAGGTGTTTCCAA	60.081	20	275	2347	2621	CCAAAGTGGATTTGTTGCCT	59.971	20	CCTGAATGAAAGCAATGCAG	59.42	20	241	2347	2587	CCAAAGTGGATTTGTTGCCT	59.971	20	TTCCCTCCTCCAAGGTGTTT	60.852	20	279	2347	2625
F01_transcript_658	1	p6	(CCGTCG)8	48	810	857	TTTTAACCGAATGCTCACCC	59.938	20	GAGACAGAAGCAGAGGGACG	60.135	20	222	678	899	TTTTAACCGAATGCTCACCC	59.938	20	GACGGCAACGGTAGAAGAGA	60.397	20	206	678	883	TTTTAACCGAATGCTCACCC	59.938	20	TTAGGGAAAAATTGGGGGAA	60.461	20	273	678	950
F01_transcript_661	1	p2	(TA)20	40	770	809	TGAATCCTTGGAATGGAGTAGG	60.312	22	TAGCAAATCAAGCATTCCGA	59.401	20	259	707	965	AAGATGAATCCTTGGAATGGAG	59.42	22	TAGCAAATCAAGCATTCCGA	59.401	20	263	703	965	TGAATCCTTGGAATGGAGTAGG	60.312	22	GCCACTTAGCAAATCAAGCA	59.066	20	265	707	971
F01_transcript_666	1	p1	(T)10	10	3107	3116	ATTATGGGTGTTTGATCGGC	59.651	20	TCCCAGAGTTGTGAAAGCCT	59.844	20	243	2962	3204	ATTATGGGTGTTTGATCGGC	59.651	20	TGTGAAAGCCTGATGCCATA	60.22	20	234	2962	3195	ATTATGGGTGTTTGATCGGC	59.651	20	AGTTGTGAAAGCCTGATGCC	60.263	20	237	2962	3198
F01_transcript_669	1	p2	(TC)6	12	53	64	TTCACTGTCGCGTTATTTGG	59.729	20	GTGTGCCGAAAGGATTTTGT	59.978	20	120	27	146	TTCACTGTCGCGTTATTTGG	59.729	20	CCTGCTAAGCCTTTCCTCCT	59.976	20	205	27	231	TTCACTGTCGCGTTATTTGG	59.729	20	TCCATTTCCTTGGCCACTAC	59.933	20	266	27	292
F01_transcript_673	1	p1	(T)10	10	3211	3220	CTTTGCCATTTCAATTTGGG	60.294	20	AATGGCCTCACTTCTTCCCT	60.074	20	146	3162	3307	CTTTGCCATTTCAATTTGGG	60.294	20	CAATTCGGACAAACAGCAGA	59.84	20	265	3162	3426	CTTTGCCATTTCAATTTGGG	60.294	20	GAAAGCAATGGCCTCACTTC	59.82	20	152	3162	3313
F01_transcript_674	1	p3	(TGA)5	15	498	512	TGAACTAATTCAGGGCAGGG	60.066	20	CTGCGATGTTTGTGGTTACG	60.172	20	215	324	538	TGAACTAATTCAGGGCAGGG	60.066	20	ACTGAGATTGTGTCTCCCGC	60.269	20	235	324	558	CCCCTTCTGATTCTGTCAGC	59.803	20	ACTGAGATTGTGTCTCCCGC	60.269	20	105	454	558
F01_transcript_675	1	p3	(GAG)7	21	30	50	TTCTTCTTCTTAATGTTTGCTGG	57.779	23	CTGGGGCTGAGTGTTGAAGT	60.298	20	201	4	204	TCTTCTTCTTCTTAATGTTTGCTGG	60.28	25	CTGGGGCTGAGTGTTGAAGT	60.298	20	203	2	204	CTTCTTCTTCTTAATGTTTGCTGG	58.696	24	CTGGGGCTGAGTGTTGAAGT	60.298	20	202	3	204
F01_transcript_675	2	p2	(AT)6	12	764	775	TGGGTGGAACTAACAACATCA	58.885	21	CCAGTTTCCACACAATGCAC	60.008	20	212	708	919	GGAGGCCATTGCCTAAAAAT	60.28	20	CTCACTGAAAAGTTTCGAGCC	59.111	21	269	632	900	GGAGGCCATTGCCTAAAAAT	60.28	20	TCACTGAAAAGTTTCGAGCC	58.076	20	268	632	899
F01_transcript_683	1	p1	(T)11	11	929	939	TTTCAAGCTTTGTTAGGCAGC	59.661	21	GGGGGTAAGCAGTGATATGC	59.415	20	279	819	1097	TTTCAAGCTTTGTTAGGCAGC	59.661	21	GGGGTAAGCAGTGATATGCC	59.415	20	278	819	1096	TTCAAGCTTTGTTAGGCAGC	58.32	20	GGGGGTAAGCAGTGATATGC	59.415	20	278	820	1097
F01_transcript_683	2	p1	(C)20	20	1094	1113	AACTCAGGGCATATCACTGCT	58.831	21	GTTTGAACTGGGGACTTGGA	59.943	20	123	1070	1192	AACTCAGGGCATATCACTGCT	58.831	21	TTTGAACTGGGGACTTGGAG	60.081	20	122	1070	1191	AACTCAGGGCATATCACTGCT	58.831	21	AGCTTTGTTTGAACTGGGGA	59.711	20	129	1070	1198
F01_transcript_686	1	p1	(A)13	13	1425	1437	CCGATTTCAAGCCAATCTGT	60.074	20	ATTTTCCTTTCTGGCCCTGT	59.94	20	256	1228	1483	ACCGATTTCAAGCCAATCTG	60.074	20	ATTTTCCTTTCTGGCCCTGT	59.94	20	257	1227	1483	CCGATTTCAAGCCAATCTGT	60.074	20	AGCACGTGCAAGATTTTCCT	59.882	20	268	1228	1495
F01_transcript_691	1	p2	(TA)6	12	56	67	--
F01_transcript_691	2	p1	(A)11	11	297	307	TTTCGAATTCTTGTGCTCTTCA	59.996	22	CGGTCGAAGAATCGGTACAT	59.955	20	169	232	400	TTTCGAATTCTTGTGCTCTTCA	59.996	22	CCCACTGTGCCTTCAAATCT	60.111	20	219	232	450	TTTCGAATTCTTGTGCTCTTCA	59.996	22	CATCGGTCACAGATCTTCCA	59.631	20	112	232	343
F01_transcript_691	3	p1	(A)10	10	1610	1619	CACACTTAGGTCGCACTGGA	59.897	20	TGGAATAATTTGGCTCCTCG	60.031	20	243	1481	1723	GGCTACCAGGGAGACAACAA	60.111	20	TGGAATAATTTGGCTCCTCG	60.031	20	151	1573	1723	GGCTACCAGGGAGACAACAA	60.111	20	GGTCTCAATGATGTGCATGG	59.925	20	203	1573	1775
F01_transcript_692	1	p3	(AGA)5	15	47	61	GCCGATCTTTCCAGAGCATA	60.318	20	TCTTTCTGCTTCATCTGCGA	59.823	20	213	13	225	GCCGATCTTTCCAGAGCATA	60.318	20	CGGTCCAATGAATTACGGAT	59.645	20	278	13	290	GCCGATCTTTCCAGAGCATA	60.318	20	TTCGGTCCAATGAATTACGG	60.692	20	280	13	292
F01_transcript_695	1	p2	(AT)7	14	110	123	GGCCCTCATTGTGTGAATTT	59.797	20	TCCACTCCGATTATCCAAGG	59.887	20	202	0	201	GGCCCTCATTGTGTGAATTT	59.797	20	CTGAAAACCGCTTTCCACTC	59.853	20	215	0	214	GGCCCTCATTGTGTGAATTT	59.797	20	TCAGCTCCACCAATTTGTCA	60.24	20	165	0	164
F01_transcript_695	2	p1	(T)14	14	3533	3546	GGGTTTTGGAAGAAGCACAC	59.574	20	TCATCCAATATGACCAGCCA	59.883	20	141	3429	3569	AATGGGTTTTGGAAGAAGCA	59.546	20	TCATCCAATATGACCAGCCA	59.883	20	144	3426	3569	GGAGGAATGGGTTTTGGAAG	60.663	20	TCATCCAATATGACCAGCCA	59.883	20	149	3421	3569
F01_transcript_699	1	p1	(T)16	16	26	41	--
F01_transcript_700	1	p2	(TA)20	40	141	180	TCAACCCTCCCTTTCCTCTT	60.045	20	TCAGTGTGCTGAAAAGGGTG	59.873	20	260	17	276	CAACCCTCCCTTTCCTCTTC	60.045	20	TCAGTGTGCTGAAAAGGGTG	59.873	20	259	18	276	TTCAACCCTCCCTTTCCTCT	60.045	20	TCAGTGTGCTGAAAAGGGTG	59.873	20	261	16	276
F01_transcript_700	2	p2	(CT)6	12	3676	3687	--
F01_transcript_706	1	p2	(CT)7	14	84	97	GAGCTTCGTTTTCCTTCGTG	59.993	20	GCTCGTCGCTCACTCTCTCT	60.041	20	263	55	317	GAGCTTCGTTTTCCTTCGTG	59.993	20	GGCGTACAACAAGCACTCAA	59.911	20	201	55	255	GAGCTTCGTTTTCCTTCGTG	59.993	20	TGGTGAAAGGCGTACAACAA	60.149	20	209	55	263
F01_transcript_706	2	p2	(AG)8	16	291	306	GAGCTTCGTTTTCCTTCGTG	59.993	20	GCTCGTCGCTCACTCTCTCT	60.041	20	263	55	317	GAGCTTCGTTTTCCTTCGTG	59.993	20	GGCGTACAACAAGCACTCAA	59.911	20	201	55	255	GAGCTTCGTTTTCCTTCGTG	59.993	20	TGGTGAAAGGCGTACAACAA	60.149	20	209	55	263
F01_transcript_709	1	p3	(AGA)5	15	500	514	CGTCATCACAGAAGAAGGCA	59.984	20	TTACCAAGCCCCATTTCATC	59.762	20	250	447	696	ATTTTGCCAAAGGTGACCAG	59.971	20	TTACCAAGCCCCATTTCATC	59.762	20	271	426	696	CGTCATCACAGAAGAAGGCA	59.984	20	TTTTACCAAGCCCCATTTCA	60.294	20	252	447	698
F01_transcript_715	1	p2	(GA)6	12	28	39	TTAGCGAAGAGCAGTCAGCA	60.035	20	GCAAAAACAGAAACCGGGTA	59.975	20	227	5	231	TTAGCGAAGAGCAGTCAGCA	60.035	20	CCCACAATCCTTGAACTCGT	59.966	20	274	5	278	TTAGCGAAGAGCAGTCAGCA	60.035	20	ACCCACAATCCTTGAACTCG	59.966	20	275	5	279
F01_transcript_724	1	p1	(T)10	10	3521	3530	ATGCGGCTGAGAATACTGCT	60.007	20	TTAAATTTGGCAAAGCACCC	59.943	20	244	3433	3676	ATGCGGCTGAGAATACTGCT	60.007	20	ACAAGCCACTCGCTCACTTT	60.058	20	186	3433	3618	ATGCGGCTGAGAATACTGCT	60.007	20	AACAAGCCACTCGCTCACTT	60.058	20	187	3433	3619
F01_transcript_731	1	p1	(T)11	11	3530	3540	GTCAAGAGGTGGGTGAGGAA	60.088	20	TGCATATTACAGAAACAATTTGGC	60.253	24	265	3333	3597	GTACGTGGTCGGCTTAGCAT	60.162	20	TGCATATTACAGAAACAATTTGGC	60.253	24	206	3392	3597	TACGGGTGAGCTTGTACGTG	59.781	20	TGCATATTACAGAAACAATTTGGC	60.253	24	219	3379	3597
F01_transcript_736	1	p3	(TTC)5	15	62	76	TGGGAGCAATTATTTCATTATTTT	58.122	24	TGGAGAAGCATAAAGTGGGC	60.214	20	153	2	154	TGGGAGCAATTATTTCATTATTTT	58.122	24	GGAGAAGCATAAAGTGGGCA	60.214	20	152	2	153	TGGGAGCAATTATTTCATTATTTT	58.122	24	TGGCAAGTGCTAAAGGGAAC	60.249	20	210	2	211
F01_transcript_740	1	p2	(AT)8	16	417	432	TTGAGTGGATGAATCCGTGA	60.048	20	TCTTACAACAACGCGCAAAG	60.052	20	240	387	626	TTGAGTGGATGAATCCGTGA	60.048	20	CTTCTTACAACAACGCGCAA	60.052	20	242	387	628	TTGAGTGGATGAATCCGTGA	60.048	20	CTTACAACAACGCGCAAAGA	60.052	20	239	387	625
F01_transcript_740	2	p3	(CTG)7	21	3375	3395	CGCGGTAGAAAAGACTACGG	59.898	20	TGCAAGCACAATGAATGACA	59.833	20	192	3322	3513	CCGCGGTAGAAAAGACTACG	59.898	20	TGCAAGCACAATGAATGACA	59.833	20	193	3321	3513	CGCGGTAGAAAAGACTACGG	59.898	20	AATTTTGAAACCAAATGCGG	59.81	20	254	3322	3575
F01_transcript_742	1	p1	(T)11	11	79	89	GGGAGATACGTAATCGAACCA	58.917	21	GAATAGCGGGACCAAATGAA	59.901	20	149	47	195	GGGAGATACGTAATCGAACCA	58.917	21	GGAAACATGGATTCCTGGTG	60.173	20	176	47	222	TTTTGCCCAATTCTGTCTCTT	58.823	21	GAATAGCGGGACCAAATGAA	59.901	20	194	2	195
F01_transcript_742	2	p1	(T)11	11	625	635	TGTTTGTTGCGATTCGTAGG	59.729	20	CTGCGGGTTCTGGTAATCAT	59.955	20	280	523	802	TTGAAGCTGGAAGGAGATGG	60.331	20	CTGCGGGTTCTGGTAATCAT	59.955	20	233	570	802	GTTTGTTGCGATTCGTAGGG	60.502	20	CTGCGGGTTCTGGTAATCAT	59.955	20	279	524	802
F01_transcript_746	1	p3	(TGT)5	15	2123	2137	GACTCAGTTGGATGGTGGCT	60.12	20	TGAACAGGTGAGTAAGCCTGC	60.447	21	257	1996	2252	GTTGTTGTTTGGGCTCGACT	60.156	20	TGAACAGGTGAGTAAGCCTGC	60.447	21	273	1980	2252	GCTCGACTCAGTTGGATGGT	60.269	20	TGAACAGGTGAGTAAGCCTGC	60.447	21	261	1992	2252
F01_transcript_757	1	p2	(TA)6	12	97	108	AGTCCACCTTCTCCCGTTCT	60.111	20	CAGATCCAGCCGAGAGGATA	60.317	20	235	26	260	ACGGCTTTTCCAAATTTCCT	59.945	20	AGATGGAATTGCCGTGAAGT	59.556	20	127	5	131	AGTCCACCTTCTCCCGTTCT	60.111	20	AGATGGAATTGCCGTGAAGT	59.556	20	106	26	131
F01_transcript_762	1	p3	(GCG)8	24	84	107	TGCCAACAACCAACCTGATA	59.964	20	TACTTCGCCGGTTATGTTCC	59.96	20	280	34	313	TGCCAACAACCAACCTGATA	59.964	20	CCGGAAAATGGAATTCAAGA	59.872	20	208	34	241	TGCCAACAACCAACCTGATA	59.964	20	CGAAATCGATGACGAAATCC	60.414	20	235	34	268
F01_transcript_768	1	p2	(CT)6	12	94	105	CTAGCATCTCCCTTTCCCG	59.776	19	CCCAATCTCCTAATGCATGG	60.288	20	205	50	254	CTAGCATCTCCCTTTCCCG	59.776	19	TAATGCATGGAGCACCTACG	59.712	20	195	50	244	CCCGGCACTTCTCAGTTTT	60.239	19	CCCAATCTCCTAATGCATGG	60.288	20	190	65	254
F01_transcript_776	1	p2	(AT)21	42	2973	3014	GGTTACGACTCTGGGAAGGG	60.872	20	TGCAACTCATCTCAACAGCC	59.992	20	175	2947	3121	GGTTACGACTCTGGGAAGGG	60.872	20	CTGAACCCAAGGCAGTTCAT	60.111	20	217	2947	3163	GGTTACGACTCTGGGAAGGG	60.872	20	CAACTCATCTCAACAGCCCA	59.831	20	173	2947	3119
F01_transcript_778	1	p2	(AG)8	16	44	59	TCCAACCATAGCCAACCAAT	60.192	20	CGAAGGGAGACACTTTCAGC	59.989	20	127	19	145	CTCTCCAACCATAGCCAACC	59.55	20	CGAAGGGAGACACTTTCAGC	59.989	20	130	16	145	TCCAACCATAGCCAACCAAT	60.192	20	GGGTCTATGCTCCCTCCTCT	59.659	20	167	19	185
F01_transcript_787	1	p3	(GAG)5	15	375	389	TACCGACAAAAACACCGACA	60.004	20	AACTGCCCCAGATCCTTCTT	60.074	20	265	148	412	CTGGGTTTTCATCCTCCTCA	60.042	20	AACTGCCCCAGATCCTTCTT	60.074	20	152	261	412	TGGGTTTTCATCCTCCTCAG	60.042	20	AACTGCCCCAGATCCTTCTT	60.074	20	151	262	412
F01_transcript_787	2	p3	(TGA)7	21	1037	1057	TTTGAACGTTGGTGGATTGA	59.941	20	GAAATTCCTGCACCTTGGAA	60.051	20	242	979	1220	GCTGGAAACAGCAACACAGA	60.032	20	TTCGAATCCGAGTAGGCATC	60.177	20	266	839	1104	GACTGCTGGAAACAGCAACA	60.032	20	TTCGAATCCGAGTAGGCATC	60.177	20	270	835	1104
F01_transcript_790	1	p2	(AT)15	30	64	93	TGAAGGAGAATCTCAAGGTCG	59.415	21	AGCTCCTGAGGACTGGTGAA	59.986	20	215	30	244	TGAAGGAGAATCTCAAGGTCG	59.415	21	TTGAGCTCCTGAGGACTGGT	59.986	20	218	30	247	TGAAGGAGAATCTCAAGGTCG	59.415	21	TCTCCGGATCCGTCTCTCTA	59.903	20	122	30	151
F01_transcript_796	1	p2	(AG)9	18	25	42	CCGCCACACCAAGTAAAAGA	61.049	20	CCTTCCCAATTTGCATTTTT	58.919	20	177	2	178	CCGCCACACCAAGTAAAAG	59.18	19	GCCGAATCGATTAGATGGAG	59.628	20	151	2	152	CCGCCACACCAAGTAAAAGA	61.049	20	AAATCCTTCCCAATTTGCATT	59.672	21	181	2	182
F01_transcript_810	1	p3	(AGA)5	15	592	606	CGTCATCACAGAAGAAGGCA	59.984	20	TTACCAAGCCCCATTTCATC	59.762	20	250	539	788	ATTTTGCCAAAGGTGACCAG	59.971	20	TTACCAAGCCCCATTTCATC	59.762	20	271	518	788	CGTCATCACAGAAGAAGGCA	59.984	20	TTTTACCAAGCCCCATTTCA	60.294	20	252	539	790
F01_transcript_814	1	p1	(A)16	16	13	28	--
F01_transcript_816	1	p3	(CCA)5	15	3515	3529	CAACAAGGAACGATCCGACT	60.111	20	TTCATTTTTCTTTGATGTTGGTG	59.02	23	265	3295	3559	ATGTTGATGCTGCCAACAAG	59.722	20	TTCATTTTTCTTTGATGTTGGTG	59.02	23	278	3282	3559	CAACAAGGAACGATCCGACT	60.111	20	TTCATTTTTCTTTGATGTTGGTGT	59.793	24	265	3295	3559
F01_transcript_826	1	p2	(AG)6	12	51	62	TCGTAACTGGAGTGCATCCTC	60.27	21	AAAAGAAGTGCCGTTAGCGA	60.018	20	221	21	241	TCGTAACTGGAGTGCATCCTC	60.27	21	CAGTTGTTGGCGTAGACGAA	59.904	20	139	21	159	TCGTAACTGGAGTGCATCCTC	60.27	21	AAGTGCCGTTAGCGATTGAG	60.407	20	216	21	236
F01_transcript_826	2	p1	(T)10	10	1761	1770	TCCACATTGGAGTTGATGGA	59.893	20	AAAAGGCATGACACATTGGA	58.976	20	140	1663	1802	TCCACATTGGAGTTGATGGA	59.893	20	AAGGCATGACACATTGGATTC	59.811	21	138	1663	1800	TCCACATTGGAGTTGATGGA	59.893	20	GCATGACACATTGGATTCACA	60.393	21	135	1663	1797
F01_transcript_828	1	p3	(GGA)5	15	1656	1670	TCCCTTCATCCCAAAAAGTG	59.903	20	CAAACTGTACACCCGACGGT	60.864	20	254	1510	1763	CATTCCCTTCATCCCAAAAA	59.733	20	CAAACTGTACACCCGACGGT	60.864	20	257	1507	1763	CCAAAAAGTGCCCATAATCG	60.315	20	CAAACTGTACACCCGACGGT	60.864	20	244	1520	1763
F01_transcript_837	1	c	(AT)6a(AT)14	41	148	188	GAGTGGACCCAACAACAAAGA	59.997	21	TCAACAAAAACCCACCATCA	59.792	20	272	23	294	TGAAAAACACAAGCACCAACA	60.179	21	TCAACAAAAACCCACCATCA	59.792	20	235	60	294	CACAAGCACCAACACAGATTG	60.206	21	TCAACAAAAACCCACCATCA	59.792	20	228	67	294
F01_transcript_839	1	p2	(AT)7	14	3277	3290	TGTGGGTGATTAGTGAGGCA	60.112	20	CCAAAATTCTGCATCCTGCT	60.214	20	239	3182	3420	TGTGGGTGATTAGTGAGGCA	60.112	20	AGCCAAAATTCTGCATCCTG	60.214	20	241	3182	3422	AAAGTGCCGTGATTTGAACC	59.978	20	TACAGCCAGCACTCTTTCCC	60.397	20	262	3120	3381
F01_transcript_842	1	p1	(T)11	11	29	39	GGAACTCAACGATACCGTCA	58.57	20	GGTGAGGAAAATGAGTGGGA	59.903	20	155	0	154	GGAACTCAACGATACCGTCA	58.57	20	AGTTGTTCCAGTGGTCGAGG	60.151	20	279	0	278	GGAACTCAACGATACCGTCA	58.57	20	AGGCTGGGGTAGTTCAGTCA	59.721	20	125	0	124
F01_transcript_842	2	p2	(AT)6	12	3564	3575	TTCTGTGATGGCAAGAGCAC	59.992	20	TGCTATGCTTAAAAGTTGAGAAATC	58.311	25	275	3330	3604	AGGCTGAGTTTGTCGTGCTT	60.058	20	TGCTATGCTTAAAAGTTGAGAAATC	58.311	25	249	3356	3604	TTCTGTGATGGCAAGAGCAC	59.992	20	GTGCTATGCTTAAAAGTTGAGAAA	57.126	24	276	3330	3605
F01_transcript_847	1	p2	(TA)18	36	1124	1159	TGGTAAGTACATAAATACTTCCTCCAT	57.8	27	TGCATTTAATTTTATGGGTCAAA	58.478	23	279	1002	1280	GCTGTCACTTTGGTAAGTACATAAATA	57.29	27	GGGTCAAATTATGAATGTGATGAA	59.956	24	274	992	1265	TGGTAAGTACATAAATACTTCCTCCAT	57.8	27	GTGCATTTAATTTTATGGGTCAAA	59.221	24	280	1002	1281
F01_transcript_847	2	p2	(AT)14	28	3505	3532	--
F01_transcript_848	1	p3	(CGG)5	15	323	337	CACGATCGCTTCCTTCATTT	60.214	20	CTGTTCCCGTTGACATTCCT	59.966	20	256	127	382	TGTGGATGCTAACACTTCCG	59.716	20	CTGTTCCCGTTGACATTCCT	59.966	20	165	218	382	TGTGGATGCTAACACTTCCG	59.716	20	GCTGTGCAGATCCTCATCAA	59.95	20	223	218	440
F01_transcript_849	1	p1	(T)10	10	1170	1179	GCCTACATGGTCTCTAGGCG	59.859	20	CGCATGCCTAGTCAGAATCA	59.972	20	236	1051	1286	CATGGTCTCTAGGCGTTTCC	59.694	20	CGCATGCCTAGTCAGAATCA	59.972	20	231	1056	1286	GCCTACATGGTCTCTAGGCG	59.859	20	TAGGAGGCCCTCTACCGTCT	60.225	20	277	1051	1327
F01_transcript_849	2	p1	(A)10	10	1496	1505	CTTTGGTCGTGTTCCTGGAT	59.966	20	AATCAGATTTGGCATGGCTC	60.043	20	162	1454	1615	CTTTGGTCGTGTTCCTGGAT	59.966	20	TTGGCATGGCTCTGTAGTTG	59.864	20	154	1454	1607	CGTCATGATAACCCCCTTTG	60.184	20	AATCAGATTTGGCATGGCTC	60.043	20	187	1429	1615
F01_transcript_850	1	p2	(AG)6	12	3093	3104	CGCTTCCATCTTCATCCATT	60.036	20	CCATCGATGCAAAGTTCTCA	59.799	20	267	3040	3306	CGCTTCCATCTTCATCCATT	60.036	20	AGCCCTGATTTCTTCTGCTG	59.574	20	128	3040	3167	CGCTTCCATCTTCATCCATT	60.036	20	GCCCTGATTTCTTCTGCTGT	59.434	20	127	3040	3166
F01_transcript_852	1	c	(CTT)6acaaacttaattatacaaagtaattac(TA)20	85	8	92	--
F01_transcript_858	1	p3	(TGT)6	18	272	289	CTGCATCCGTTTCTCTCTCC	59.95	20	TGCAATCCCATTCTCATTCA	60.009	20	266	62	327	TTGCCGTCATCGTAATTTGA	60.073	20	TGCAATCCCATTCTCATTCA	60.009	20	192	136	327	CAATTCCTCCGATCATCGTT	59.894	20	TGCAATCCCATTCTCATTCA	60.009	20	210	118	327
F01_transcript_861	1	p2	(AC)6	12	38	49	TTTTGACGACTCCTCTCTCACA	60.028	22	GGGAAGTTTCCGATTAGGGA	60.258	20	132	7	138	TTTTGACGACTCCTCTCTCACA	60.028	22	GGCTTTGAAGTCGCCATAAC	59.713	20	224	7	230	TTTTGACGACTCCTCTCTCACA	60.028	22	AGGGAAGTTTCCGATTAGGG	59.415	20	133	7	139
F01_transcript_863	1	p3	(CTT)9	27	187	213	TTGGAGAGAGAAAAACACCG	57.924	20	AAGGTCCACCAGTAACCACG	59.884	20	213	93	305	TTGGAGAGAGAAAAACACCG	57.924	20	CCTTCAAATGAGGACGGAGA	60.187	20	269	93	361	TTGGAGAGAGAAAAACACCG	57.924	20	TCCTTCAAATGAGGACGGAG	60.187	20	270	93	362
F01_transcript_868	1	c	(CA)12ttctctcag(TC)8	49	1116	1164	CTCGCTTACTCACACACTCACA	59.16	22	TCCAACGTTGCACCTACATC	59.572	20	232	1079	1310	CTCGCTTACTCACACACTCACA	59.16	22	TTGCAACATCGAATTCCAAC	59.523	20	246	1079	1324	TCGCTTACTCACACACTCACA	58.053	21	TCCAACGTTGCACCTACATC	59.572	20	231	1080	1310
F01_transcript_873	1	p1	(T)10	10	1097	1106	TGAGAGCTTGTGGGATGAGA	59.499	20	TCTGATTGCCCTCCATGTTT	60.461	20	277	906	1182	TGAGAGCTTGTGGGATGAGA	59.499	20	TTCTGATTGCCCTCCATGTT	60.461	20	278	906	1183	TGAGAGCTTGTGGGATGAGA	59.499	20	TTTCTGATTGCCCTCCATGT	60.461	20	279	906	1184
F01_transcript_876	1	p2	(TC)6	12	73	84	TTGGTGTCCATTTGTGCTGT	60.008	20	AATCACAAGAACCCCGTGAG	59.966	20	260	14	273	TTGGTGTCCATTTGTGCTGT	60.008	20	ATAGCCCAAACAACAAAGCG	60.131	20	214	14	227	TTGGTGTCCATTTGTGCTGT	60.008	20	AGCGGGTGACTTTGTACTGC	60.321	20	198	14	211
F01_transcript_877	1	p2	(AG)8	16	34	49	CATAAACACCATCGAACGGA	59.395	20	TGTCGGTGTTTTTGTCGGTA	60.004	20	148	10	157	CATAAACACCATCGAACGGA	59.395	20	CTGAGGAGGATGAAAACCCA	60.042	20	262	10	271	CATAAACACCATCGAACGGA	59.395	20	TGAGGAGGATGAAAACCCAG	60.042	20	261	10	270
F01_transcript_877	2	p3	(GAG)5	15	368	382	AGCTGAAAGGAGCTTTGCTG	59.898	20	AGCATTGGAATCCGATTTTG	59.901	20	278	329	606	AGCTGAAAGGAGCTTTGCTG	59.898	20	GCATTGGAATCCGATTTTGT	59.768	20	277	329	605	TTTGCTGCTATCCCTTTTCG	60.335	20	TTCACCCCATTTTCTTCAGC	60.051	20	222	342	563
F01_transcript_877	3	p3	(TGA)5	15	1027	1041	GGATGGGATTTGAACATTGG	59.991	20	TTCGAATCCGAGTAGGCATC	60.177	20	128	961	1088	GCTGGAAACAGCAACACAGA	60.032	20	TTCGAATCCGAGTAGGCATC	60.177	20	260	829	1088	GACTGCTGGAAACAGCAACA	60.032	20	TTCGAATCCGAGTAGGCATC	60.177	20	264	825	1088
F01_transcript_878	1	p3	(CTC)7	21	379	399	TGTTCCGATTTGGGTATGGT	60.051	20	TGCAGTTTTTGCTGCTCAAC	60.18	20	260	203	462	TAAGCTTGTTCCGATTTGGG	60.067	20	TGCAGTTTTTGCTGCTCAAC	60.18	20	266	197	462	AAGGAATTGAGTGGTTCCCC	60.169	20	GCTATTAGAGTTGCCACGCC	59.873	20	234	251	484
F01_transcript_878	2	p3	(TGA)5	15	1909	1923	TGACAGTGCCTGCAGATTTT	59.445	20	AGGTTCTTCACCTATCCGGC	60.464	20	239	1760	1998	TGACAGTGCCTGCAGATTTT	59.445	20	TCCGGCTATTCTGAGTGACA	59.394	20	225	1760	1984	AGAATGACAGTGCCTGCAGAT	59.889	21	AGGTTCTTCACCTATCCGGC	60.464	20	243	1756	1998
F01_transcript_887	1	p3	(TCA)5	15	2803	2817	TAAGAATGTTACGGGCTCGG	60.089	20	GACGTGACCGTTCTTCCAAT	59.973	20	114	2780	2893	TGCCCTTACAACTTGCCTCT	59.875	20	GACGTGACCGTTCTTCCAAT	59.973	20	144	2750	2893	GCCCTTACAACTTGCCTCTG	59.875	20	GACGTGACCGTTCTTCCAAT	59.973	20	143	2751	2893
F01_transcript_890	1	p2	(CT)7	14	79	92	GAGCTTCGTTTTCCTTCGTG	59.993	20	GCTCGTCGCTCACTCTCTCT	60.041	20	263	50	312	GAGCTTCGTTTTCCTTCGTG	59.993	20	GGCGTACAACAAGCACTCAA	59.911	20	201	50	250	GAGCTTCGTTTTCCTTCGTG	59.993	20	TGGTGAAAGGCGTACAACAA	60.149	20	209	50	258
F01_transcript_890	2	p2	(AG)8	16	286	301	GAGCTTCGTTTTCCTTCGTG	59.993	20	GCTCGTCGCTCACTCTCTCT	60.041	20	263	50	312	GAGCTTCGTTTTCCTTCGTG	59.993	20	GGCGTACAACAAGCACTCAA	59.911	20	201	50	250	GAGCTTCGTTTTCCTTCGTG	59.993	20	TGGTGAAAGGCGTACAACAA	60.149	20	209	50	258
F01_transcript_907	1	c*	(T)13(TTA)6*	29	3496	3524	TTGGAGATGAGGGATTGAGC	60.158	20	TTAACACCGTGGGAGCATTT	60.365	20	237	3315	3551	TTGGAGATGAGGGATTGAGC	60.158	20	TTTAACACCGTGGGAGCATT	60.365	20	238	3315	3552	GGAGATGAGGGATTGAGCAC	59.617	20	TTAACACCGTGGGAGCATTT	60.365	20	235	3317	3551
F01_transcript_908	1	p3	(CCA)5	15	218	232	TGTTGTGTCCGTCTTCTTCG	59.873	20	GCTGCTGGTGGTGTTGTAGA	59.905	20	155	195	349	TGTTGTGTCCGTCTTCTTCG	59.873	20	TAAAGCTGCTGGTGGTGTTG	59.904	20	159	195	353	TCTCTGTGGCTGTTGTGTCC	59.872	20	GCTGCTGGTGGTGTTGTAGA	59.905	20	165	185	349
F01_transcript_908	2	p6	(TTCTGC)7	42	2126	2167	CGGATTGATTGGGTTATTGC	60.153	20	AGCAGTGCCCAAGTTGAGAT	59.874	20	219	2033	2251	CGGATTGATTGGGTTATTGC	60.153	20	TTTCTGATGCGCTTGAACTG	60.134	20	239	2033	2271	CGGATTGATTGGGTTATTGC	60.153	20	CAGTGCCCAAGTTGAGATGA	59.831	20	217	2033	2249
F01_transcript_909	1	p2	(CT)7	14	46	59	GAGCTTCGTTTTCCTTCGTG	59.993	20	GCTCGTCGCTCACTCTCTCT	60.041	20	263	17	279	GAGCTTCGTTTTCCTTCGTG	59.993	20	GGCGTACAACAAGCACTCAA	59.911	20	201	17	217	GAGCTTCGTTTTCCTTCGTG	59.993	20	TGGTGAAAGGCGTACAACAA	60.149	20	209	17	225
F01_transcript_909	2	p2	(AG)8	16	253	268	GAGCTTCGTTTTCCTTCGTG	59.993	20	GCTCGTCGCTCACTCTCTCT	60.041	20	263	17	279	GAGCTTCGTTTTCCTTCGTG	59.993	20	GGCGTACAACAAGCACTCAA	59.911	20	201	17	217	GAGCTTCGTTTTCCTTCGTG	59.993	20	TGGTGAAAGGCGTACAACAA	60.149	20	209	17	225
F01_transcript_910	1	p1	(T)11	11	263	273	CTCTGTTTTTCACCGTGGGT	60.005	20	GCAAGCCATTTTCCCTGATA	60.038	20	216	144	359	GGTGCCAACAAGGAAAGAAA	60.088	20	GAAAAGCACCCACTAACCCA	59.971	20	199	207	405	GGTGCCAACAAGGAAAGAAA	60.088	20	GCAAGCCATTTTCCCTGATA	60.038	20	153	207	359
F01_transcript_910	2	p3	(GAA)5	15	2560	2574	TTTCACAACAGTGGGACCAA	59.976	20	CATTGTTTGCTGCTCCTTCA	59.988	20	270	2347	2616	GACCAAGGCAAGCAGTTTTC	59.859	20	CATTGTTTGCTGCTCCTTCA	59.988	20	256	2361	2616	ACCAAAGGAAGGGCAGAAAT	59.94	20	CTTTTCCATGTCCCTCCAAA	59.903	20	227	2459	2685
F01_transcript_911	1	p2	(TA)14	28	3334	3361	GAGTGAGGGACAGCCTCAAG	59.986	20	TCTCCTTGTTCAGCCCAATC	60.195	20	276	3142	3417	AGAGTGAGGGACAGCCTCAA	59.986	20	TCTCCTTGTTCAGCCCAATC	60.195	20	277	3141	3417	AGTGAGGGACAGCCTCAAGA	59.986	20	TCTCCTTGTTCAGCCCAATC	60.195	20	275	3143	3417
F01_transcript_914	1	p1	(A)10	10	2235	2244	CCTCTCCGTCTGGAAATGAG	59.797	20	CCCATCCAACTCTGAGCAAT	60.073	20	276	2060	2335	CCGTCTGGAAATGAGAGTCC	59.655	20	CCCATCCAACTCTGAGCAAT	60.073	20	271	2065	2335	CGTCTGGAAATGAGAGTCCC	59.655	20	CCCATCCAACTCTGAGCAAT	60.073	20	270	2066	2335
F01_transcript_924	1	p3	(CTT)5	15	33	47	--
F01_transcript_924	2	p2	(CT)11	22	251	272	ATATTTCTCGGAGATCCGGC	60.386	20	ATTTCTCGACACCAACCCAG	59.966	20	196	101	296	CCGGCGTTTATGGTCATTTA	60.691	20	ATTTCTCGACACCAACCCAG	59.966	20	181	116	296	ATATTTCTCGGAGATCCGGC	60.386	20	CATGGATTTCTCGACACCAA	59.496	20	201	101	301
F01_transcript_929	1	p1	(T)12	12	3354	3365	TCTGATCGACATTGGAGCAC	59.794	20	GAGTCTCCCTGCCTGACAAG	59.986	20	268	3179	3446	CGACATTGGAGCACTCTTTG	59.44	20	GAGTCTCCCTGCCTGACAAG	59.986	20	262	3185	3446	CTCCATGGCCTTCCTTTAGA	59.264	20	GAGTCTCCCTGCCTGACAAG	59.986	20	205	3242	3446
F01_transcript_930	1	p1	(T)10	10	3463	3472	CATAATCGTTTTTGGGGGTG	60.046	20	TGAGCAATATGCAGAGTACAAAGA	59.101	24	188	3315	3502	CATAATCGTTTTTGGGGGTG	60.046	20	TTTGAGCAATATGCAGAGTACAAA	59.004	24	190	3315	3504	CATAATCGTTTTTGGGGGTG	60.046	20	TTTGAGCAATATGCAGAGTACAAAG	59.868	25	190	3315	3504
F01_transcript_936	1	p2	(TA)19	38	174	211	TTCCCGAATTTCCTGGTGTA	60.301	20	TCACAATCAAACACCTCCAGA	59.124	21	268	69	336	TTCCCGAATTTCCTGGTGTA	60.301	20	CACAATCAAACACCTCCAGAAA	60.008	22	267	69	335	TTTTTCCCGAATTTCCTGGT	60.644	20	TCACAATCAAACACCTCCAGA	59.124	21	271	66	336
F01_transcript_936	2	p1	(T)18	18	526	543	AAGCAACCAAGCTCCATGTT	59.74	20	TCGTCTTCAGTGATTGGCAG	59.984	20	234	413	646	AAGCAACCAAGCTCCATGTT	59.74	20	CGTCTTCAGTGATTGGCAGA	59.984	20	233	413	645	AAGCAACCAAGCTCCATGTT	59.74	20	CTCGTCTTCAGTGATTGGCA	59.984	20	235	413	647
F01_transcript_940	1	p2	(TG)8	16	3137	3152	AAGGGCGCTAATCTTCAACA	59.845	20	TGCTTACTTCCACGTGCTTG	60.05	20	254	2969	3222	GATAAGGTGCAGCAAAAGGG	59.708	20	TGCTTACTTCCACGTGCTTG	60.05	20	269	2954	3222	CAAAAGGGCGCTAATCTTCA	60.335	20	TGCTTACTTCCACGTGCTTG	60.05	20	257	2966	3222
F01_transcript_941	1	p2	(TA)6	12	200	211	ATATATCCGTGCGGCTTGTG	60.876	20	AAATGTTGATTCGGGATGGA	60.133	20	195	171	365	ATATATCCGTGCGGCTTGTG	60.876	20	GATTCGGGATGGATCCTCTT	60.236	20	188	171	358	ATATATCCGTGCGGCTTGTG	60.876	20	ATTCGGGATGGATCCTCTTT	59.728	20	187	171	357
F01_transcript_942	1	c	(CTT)9acaaacttaattatacaaactaattactatatatt(TA)11	84	7	90	--
F01_transcript_944	1	p4	(TATC)8	32	3113	3144	CGGCAAGCAACAGACCTAAT	60.27	20	CGCTCACACAAGAAACCTCA	60.025	20	195	2979	3173	TTGTGGCGTGATAGGTGAAG	59.716	20	CGCTCACACAAGAAACCTCA	60.025	20	273	2901	3173	AAGTAGTTGCCTGCCTGGTG	60.312	20	CGCTCACACAAGAAACCTCA	60.025	20	256	2918	3173
F01_transcript_951	1	p1	(C)19	19	3116	3134	GTGGTTGGATATGTTGGGGA	60.439	20	CAGCACAAGAGCTAGGGGAG	60.149	20	174	2991	3164	TGGTTGGATATGTTGGGGAC	60.439	20	CAGCACAAGAGCTAGGGGAG	60.149	20	173	2992	3164	GTGGTTGGATATGTTGGGGA	60.439	20	GCACAAGAGCTAGGGGAGAA	59.574	20	172	2991	3162
F01_transcript_952	1	p2	(AT)11	22	71	92	CCTTCCCCAAACCAGTCTTT	60.332	20	TTTGGGGTTTATGGTTTGGA	60.024	20	256	7	262	CCTTCCCCAAACCAGTCTTT	60.332	20	GCTCCAGCTTTGAATTTTGG	59.823	20	271	7	277	CCTTCCCCAAACCAGTCTTT	60.332	20	CTCCAGCTTTGAATTTTGGG	59.679	20	270	7	276
F01_transcript_957	1	p3	(CAG)6	18	3254	3271	TGAAGCACGGCAACAGTATC	59.871	20	TCGGTTTTGAAACCACAACA	59.981	20	257	3185	3441	GAAGCACGGCAACAGTATCA	59.871	20	TCGGTTTTGAAACCACAACA	59.981	20	256	3186	3441	AAAAGCATCGCCAAGCTAAG	59.63	20	TCGGTTTTGAAACCACAACA	59.981	20	225	3217	3441
F01_transcript_959	1	p2	(GA)6	12	154	165	TGGAGGACAGAAGGGAGAGA	59.913	20	GATGACAACAAAGCTTCGCA	59.995	20	119	94	212	TGGAGGACAGAAGGGAGAGA	59.913	20	TGACAACAAAGCTTCGCATC	59.995	20	117	94	210	TCGTCAACCGAAGAAACTGA	59.415	20	GATGACAACAAAGCTTCGCA	59.995	20	145	68	212
F01_transcript_964	1	p1	(T)11	11	1505	1515	ATGAGGAGATGATGAACGGG	59.886	20	AAAAGAGAAGGCTGCCATTG	59.452	20	264	1331	1594	ATGAGGAGATGATGAACGGG	59.886	20	TGAAAAAGAGAAGGCTGCCA	61.021	20	267	1331	1597	ATGAGGAGATGATGAACGGG	59.886	20	AAGAGAAGGCTGCCATTGGT	61.153	20	262	1331	1592
F01_transcript_969	1	p2	(AG)8	16	45	60	CATAAACACCATCGAACGGA	59.395	20	TGTCGGTGTTTTTGTCGGTA	60.004	20	148	21	168	CATAAACACCATCGAACGGA	59.395	20	CTGAGGAGGATGAAAACCCA	60.042	20	262	21	282	CATAAACACCATCGAACGGA	59.395	20	TGAGGAGGATGAAAACCCAG	60.042	20	261	21	281
F01_transcript_969	2	p3	(GAG)5	15	379	393	AGCTGAAAGGAGCTTTGCTG	59.898	20	AGCATTGGAATCCGATTTTG	59.901	20	278	340	617	AGCTGAAAGGAGCTTTGCTG	59.898	20	GCATTGGAATCCGATTTTGT	59.768	20	277	340	616	TTTGCTGCTATCCCTTTTCG	60.335	20	TTCACCCCATTTTCTTCAGC	60.051	20	222	353	574
F01_transcript_969	3	p3	(TGA)5	15	1038	1052	GGATGGGATTTGAACATTGG	59.991	20	TTCGAATCCGAGTAGGCATC	60.177	20	128	972	1099	GCTGGAAACAGCAACACAGA	60.032	20	TTCGAATCCGAGTAGGCATC	60.177	20	260	840	1099	GACTGCTGGAAACAGCAACA	60.032	20	TTCGAATCCGAGTAGGCATC	60.177	20	264	836	1099
F01_transcript_970	1	p2	(AT)29	58	3166	3223	TGTATTGCCCCGAGTTGAAT	60.331	20	GACAACGAATACAAGCCCGT	60	20	267	3132	3398	TGTATTGCCCCGAGTTGAAT	60.331	20	GCCAAATTTCTGCATCCTGT	60.081	20	223	3132	3354	AAAGTGCCGTGATTTGAACC	59.978	20	AGATGACTGCCAACTCCAGC	60.418	20	261	3010	3270
F01_transcript_975	1	p2	(TA)19	38	3405	3442	TTCTCGTCGGCTGATTTCTT	59.955	20	TGTTTTAGTTTTCTCCAATATTTCAA	57.622	26	226	3269	3494	CCAGCCAGAACCGATATCAT	59.917	20	TGTTTTAGTTTTCTCCAATATTTCAA	57.622	26	254	3241	3494	TTGTTAGGCTGCTGTGGTTG	59.904	20	TGTTTTAGTTTTCTCCAATATTTCAA	57.622	26	184	3311	3494
F01_transcript_977	1	p2	(CT)11	22	39	60	GCAAGAACCAAGAGGGAGAA	59.405	20	GGAAGAAGCTGAGGGCTTTT	59.962	20	257	2	258	GCAAGAACCAAGAGGGAGAA	59.405	20	GAGGAAGAAGCTGAGGGCTT	60.096	20	259	2	260	AGGCAAGAACCAAGAGGGAG	60.756	20	GGAAGAAGCTGAGGGCTTTT	59.962	20	259	0	258
F01_transcript_977	2	p3	(AGA)5	15	294	308	AAAAGCCCTCAGCTTCTTCC	59.962	20	CGATCACCGACAGGAATTTT	59.933	20	173	239	411	CCGGCCTTATCCACTATTCA	59.916	20	CGATCACCGACAGGAATTTT	59.933	20	246	166	411	AAGCCCTCAGCTTCTTCCTC	60.096	20	CGATCACCGACAGGAATTTT	59.933	20	171	241	411
F01_transcript_979	1	p2	(GA)7	14	12	25	--
F01_transcript_980	1	p2	(GA)9	18	13	30	--
F01_transcript_980	2	p1	(A)11	11	231	241	CACACCAAACATCCCAAATG	59.667	20	ATTGTTGGCATTGCATTGAA	59.937	20	193	101	293	CCACACCAAACATCCCAAAT	60.474	20	ATTGTTGGCATTGCATTGAA	59.937	20	194	100	293	TCCCAAATGATTTTGTGCTG	59.518	20	ATTGTTGGCATTGCATTGAA	59.937	20	182	112	293
F01_transcript_980	3	c	(T)10atatgggatttccagttgggaatatcgggtatgtgctggaga(T)10	62	3274	3335	GGGGAGAAATTTACGGAGAGA	59.541	21	CCATCCATGTCAAGCAGATG	60.072	20	202	3235	3436	GGGGAGAAATTTACGGAGAGA	59.541	21	GTCCATCCATGTCAAGCAGA	59.637	20	204	3235	3438	GGGGAGAAATTTACGGAGAGA	59.541	21	ACAGAAATGGGTGATGGTCC	59.636	20	220	3235	3454
F01_transcript_987	1	p1	(T)11	11	3318	3328	GCGAATTCGACAGAGGAGAC	59.957	20	AGGCTCAAAATTCTCGACCA	59.813	20	160	3198	3357	GAATTCGACAGAGGAGACGG	59.803	20	AGGCTCAAAATTCTCGACCA	59.813	20	158	3200	3357	CTGGATCTGGTCGTTTCACC	60.51	20	AGGCTCAAAATTCTCGACCA	59.813	20	116	3242	3357
F01_transcript_1001	1	p2	(AG)6	12	66	77	GGGGGTGACTGTGGATAGAA	59.779	20	AAGTAGATCACCACCGCCAG	60.134	20	266	40	305	GGGGGTGACTGTGGATAGAA	59.779	20	GCCAGCATCAGGACTTGAAT	60.226	20	251	40	290	GGGGGTGACTGTGGATAGAA	59.779	20	TAGGGAGGGAGGGAGAGAGA	60.284	20	199	40	238
F01_transcript_1001	2	p1	(A)10	10	3376	3385	GAGAGCTCCACACCCTCAAG	59.986	20	GTGTTCCCACTGCACGTCTA	59.751	20	251	3160	3410	GAGAGCTCCACACCCTCAAG	59.986	20	TAGTGTTCCCACTGCACGTC	59.751	20	253	3160	3412	GGTGAAGCTGAAGGGACTTG	59.844	20	GTGTTCCCACTGCACGTCTA	59.751	20	214	3197	3410
F01_transcript_1007	1	p1	(T)10	10	47	56	AGGCGAAGTTAGGGTTTTGC	60.612	20	TTTCCGTTTCCCAAGAGTTG	60.081	20	175	1	175	AGGCGAAGTTAGGGTTTTGC	60.612	20	TGGTTAGTGGCTTCCGTTTC	60.11	20	213	1	213	AGGCGAAGTTAGGGTTTTGC	60.612	20	CGCTTAGAGGCAGATTCCTG	60.11	20	231	1	231
F01_transcript_1007	2	p2	(AT)14	28	3285	3312	TTGTATCCTCCCACCCCATA	60.006	20	TCGTACCATGTGCATAAACCA	59.864	21	204	3242	3445	GCCCCTTCTTTGTATCCTCC	59.903	20	TCGTACCATGTGCATAAACCA	59.864	21	213	3233	3445	GGCCCCTTCTTTGTATCCTC	59.903	20	TCGTACCATGTGCATAAACCA	59.864	21	214	3232	3445
F01_transcript_1008	1	p2	(GA)6	12	41	52	TGAACAACAACTAGCAAAGATTGTC	59.756	25	CAACGACCTAAACCCATGCT	59.993	20	139	1	139	GAACAACAACTAGCAAAGATTGTCA	59.756	25	CAACGACCTAAACCCATGCT	59.993	20	138	2	139	GAACAACAACTAGCAAAGATTGTCA	59.756	25	TTGGGCTTGGAATTAGATCG	60.031	20	251	2	252
F01_transcript_1009	1	p2	(TA)6	12	65	76	GACGAACACAGAACCAGCAA	59.88	20	ACCATCGAACTCACCACCTC	59.969	20	260	2	261	GACGAACACAGAACCAGCAA	59.88	20	CGAACTCACCACCTCACTCA	59.864	20	255	2	256	GACGAACACAGAACCAGCAA	59.88	20	GCGAAATCTGAGGGTCAAGA	60.34	20	170	2	171
F01_transcript_1009	2	p3	(ATG)5	15	640	654	ACTGTGAACTGAAAACCCCG	60.005	20	GCAGATTTCTTGGCAACTCC	59.82	20	178	576	753	ACTGTGAACTGAAAACCCCG	60.005	20	CTTGGCAACTCCTCTACCCA	60.246	20	170	576	745	AACGAAAAGCCCAAGAGGAT	60.074	20	GCAGATTTCTTGGCAACTCC	59.82	20	211	543	753
F01_transcript_1011	1	p1	(A)10	10	3	12	--
F01_transcript_1017	1	p3	(TCT)5	15	118	132	GGGAGAGGAGAAAAACACCA	59.112	20	GTTCGCCAGTAGCCACGTAT	60.162	20	199	23	221	TGGGAGAGGAGAAAAACACC	59.112	20	GTTCGCCAGTAGCCACGTAT	60.162	20	200	22	221	GGGAGAGGAGAAAAACACCA	59.112	20	CTAAGGTTCGCCAGTAGCCA	60.399	20	204	23	226
F01_transcript_1023	1	p1	(T)10	10	229	238	CCTCATAAGACCACCCAAACA	59.838	21	TAACTGGTTGGCCACAATGA	59.964	20	277	192	468	CCTCATAAGACCACCCAAACA	59.838	21	AGATATGATTCCGGGCACAG	59.917	20	157	192	348	CCTCATAAGACCACCCAAACA	59.838	21	TTGAGTGACCGATGAAACCA	60.088	20	247	192	438
F01_transcript_1026	1	p3	(TAT)5	15	3360	3374	GGGTGAGGGTGGGTAAGTTT	60.088	20	TTCCAACATGTAGGCTCCAA	59.123	20	129	3300	3428	CGAGGATTTTGAATTGGGAA	59.872	20	TTCCAACATGTAGGCTCCAA	59.123	20	242	3187	3428	TTCCCGAGGATTTTGAATTG	59.872	20	TTCCAACATGTAGGCTCCAA	59.123	20	246	3183	3428
F01_transcript_1030	1	p1	(C)21	21	65	85	TATTTGGTCTTCGTCTCGGC	60.214	20	AATCAAGGAGTGTTGTCGGG	59.966	20	216	12	227	TATTTGGTCTTCGTCTCGGC	60.214	20	ACCGTCGCAGCTAAATCAGT	59.904	20	254	12	265	TATTTGGTCTTCGTCTCGGC	60.214	20	GGGGGTAAAATTTCGCAGAT	60.15	20	126	12	137
F01_transcript_1030	2	p5	(GTGGA)6	30	280	309	CCCGACAACACTCCTTGATT	59.966	20	TTCAGCTGCTGTATTCGGTG	60.011	20	136	208	343	ATCTGCGAAATTTTACCCCC	60.15	20	TTCAGCTGCTGTATTCGGTG	60.011	20	226	118	343	CCCGACAACACTCCTTGATT	59.966	20	GCTGCTGTATTCGGTGTTCA	59.871	20	132	208	339
F01_transcript_1030	3	p3	(CAG)11	33	3230	3262	CTGATGCACGGCAACAGTAT	59.746	20	TCGGTTTTGAAACCACAACA	59.981	20	268	3160	3427	AAAAGCATCGCCAAGCTAAG	59.63	20	TCGGTTTTGAAACCACAACA	59.981	20	235	3193	3427	ATGCACGGCAACAGTATCAC	59.602	20	TCGGTTTTGAAACCACAACA	59.981	20	265	3163	3427
F01_transcript_1033	1	p1	(T)11	11	3376	3386	GAAGATGCAAGATGCAGCAA	60.104	20	GAGAATTTACCATTAAGTTCACCCA	59.69	25	272	3160	3431	AGCAAGCGACATCTCTAGGC	59.746	20	GAGAATTTACCATTAAGTTCACCCA	59.69	25	257	3175	3431	GAAGATGCAAGATGCAGCAA	60.104	20	GAATTTACCATTAAGTTCACCCAA	58.428	24	270	3160	3429
F01_transcript_1037	1	p1	(A)11	11	3379	3389	CGGATCAAGGAAGTGTAGCC	59.694	20	CAAACAAAACCTACCCATTGAA	58.896	22	213	3209	3421	CGGATCAAGGAAGTGTAGCC	59.694	20	CAAACAAAACCTACCCATTGAAA	60.128	23	213	3209	3421	CGGATCAAGGAAGTGTAGCC	59.694	20	ACAAACAAAACCTACCCATTGAA	59.675	23	214	3209	3422
F01_transcript_1038	1	p1	(A)12	12	68	79	TCTCTGGCAAGTTACGCTGTT	60.067	21	CCGGAGATAGGATTTCACCA	59.887	20	188	13	200	TCTCTGGCAAGTTACGCTGTT	60.067	21	CTTCCCGGAGCTGTCATAAG	59.83	20	260	13	272	CTCTCTGGCAAGTTACGCTG	58.825	20	CCGGAGATAGGATTTCACCA	59.887	20	189	12	200
F01_transcript_1039	1	p3	(TCT)5	15	176	190	TCTTCATCAATCTCGAAAGCC	59.401	21	GTTCGCCAGTAGCCACGTAT	60.162	20	227	53	279	TCTTCATCAATCTCGAAAGCC	59.401	21	CTAAGGTTCGCCAGTAGCCA	60.399	20	232	53	284	TCTTCATCAATCTCGAAAGCC	59.401	21	TCTAAGGTTCGCCAGTAGCC	59.476	20	233	53	285
F01_transcript_1054	1	p2	(AG)6	12	3152	3163	GGGCACCAAACTTATTCAGC	59.574	20	GCATGCAAGTTTGAGCAAGA	60.142	20	237	3116	3352	AGGGGCACCAAACTTATTCA	59.429	20	GCATGCAAGTTTGAGCAAGA	60.142	20	239	3114	3352	GGGGCACCAAACTTATTCAG	59.429	20	GCATGCAAGTTTGAGCAAGA	60.142	20	238	3115	3352
F01_transcript_1068	1	c	(AGA)17(TGA)5	66	3101	3166	GTGTGGATTTCCTTTGACGG	60.353	20	CAATCCACATGCATATCCCA	60.159	20	169	3052	3220	GGTAACTTGGGCTTGTGTGG	60.41	20	CAATCCACATGCATATCCCA	60.159	20	183	3038	3220	CAAACAACCATCTTGACGGA	59.541	20	CAATCCACATGCATATCCCA	60.159	20	254	2967	3220
F01_transcript_1069	1	p2	(AG)6	12	3130	3141	TTGAGTCGGTGGTGAGACTG	59.864	20	AACTGCCCTTTTCCCAATTT	59.814	20	276	3065	3340	ATGGGCTTGACGTACCTGAC	59.997	20	ATTATGTCATTGCGCCTGTG	59.572	20	241	2930	3170	ACCGAAACAATTTCACGGAG	59.971	20	ATTATGTCATTGCGCCTGTG	59.572	20	205	2966	3170
F01_transcript_1074	1	p3	(TAT)5	15	2276	2290	CGCTCGACTGTAAGGAGAGG	60.149	20	ATCCAACGTCAACCGAGAAA	60.495	20	152	2195	2346	CGCTCGACTGTAAGGAGAGG	60.149	20	TCCAACGTCAACCGAGAAAT	60.495	20	151	2195	2345	AATCCGCTCGACTGTAAGGA	59.836	20	ATCCAACGTCAACCGAGAAA	60.495	20	156	2191	2346
F01_transcript_1077	1	p3	(AGA)6	18	53	70	GCCGACAAACAAGAGAGAGG	59.989	20	ATGAAGAGGTGTTTCCACCG	59.966	20	152	0	151	GCCGACAAACAAGAGAGAGG	59.989	20	AGGTGGAGGGCGTTAAGATT	59.962	20	178	0	177	GCCGACAAACAAGAGAGAGG	59.989	20	TTGCTGCCACAAGCTTACAC	60.058	20	118	0	117
F01_transcript_1079	1	p3	(TCT)5	15	257	271	TGGAGTTGTTCAACACGGAA	60.128	20	AGGCTGGACCAGAATCAACA	60.656	20	258	93	350	TGGAGTTGTTCAACACGGAA	60.128	20	GGCTGGACCAGAATCAACAG	60.656	20	257	93	349	CAACACGGAAAAAGGCAGTT	60.147	20	AGGCTGGACCAGAATCAACA	60.656	20	248	103	350
F01_transcript_1079	2	p1	(T)20	20	3229	3248	GTTGGCGGCTAAGTAACGAG	59.904	20	TTGTCAAGCTCAAGTCCCCT	59.844	20	211	3065	3275	GTTGGCGGCTAAGTAACGAG	59.904	20	CTTGTCAAGCTCAAGTCCCC	59.844	20	212	3065	3276	GTTGGCGGCTAAGTAACGAG	59.904	20	CCCTCTAGAATCTGGCGTTG	59.83	20	241	3065	3305
F01_transcript_1081	1	p2	(AG)6	12	53	64	--
F01_transcript_1082	1	p2	(AG)9	18	3129	3146	ATGGGCTTGACGTACCTGAC	59.997	20	CTCTTAAATTGCGCGTGTGA	60.014	20	246	2929	3174	ATGGGCTTGACGTACCTGAC	59.997	20	TCTTAAATTGCGCGTGTGAG	60.014	20	245	2929	3173	ACCGAAACAATTTCACGGAG	59.971	20	TCTTAAATTGCGCGTGTGAG	60.014	20	209	2965	3173
F01_transcript_1083	1	p2	(AT)6	12	1479	1490	GTCTTGTGTTTTTGCCCCTG	60.529	20	TGTGGACTTTCCAGCATCAA	60.24	20	279	1396	1674	GTCTTGTGTTTTTGCCCCTG	60.529	20	TTGTGGACTTTCCAGCATCA	60.24	20	280	1396	1675	CAGGTCTTGTGTTTTTGCCC	60.529	20	TGGACTTTCCAGCATCAACA	60.24	20	280	1393	1672
F01_transcript_1088	1	p6	(TCTATA)5	30	105	134	TCTTCTTCGCGCCTCTACTC	59.859	20	CAGCAGCAGAACAGCATCAT	60.168	20	165	41	205	TTTTCTTCTTCGCGCCTCTA	60.223	20	CAGCAGCAGAACAGCATCAT	60.168	20	168	38	205	TTTCTTCTTCGCGCCTCTAC	59.73	20	CAGCAGCAGAACAGCATCAT	60.168	20	167	39	205
F01_transcript_1092	1	p2	(AT)18	36	1242	1277	CTATGTTGAGGGAGGGGGAT	60.147	20	GAAACTATGAGCCCTTGCCA	60.214	20	279	1134	1412	CTATGTTGAGGGAGGGGGAT	60.147	20	GAGCCCTTGCCAACTAATGA	60.214	20	271	1134	1404	ACTATGTTGAGGGAGGGGGA	60.704	20	GAAACTATGAGCCCTTGCCA	60.214	20	280	1133	1412
F01_transcript_1092	2	p1	(T)10	10	3354	3363	GTGGATTCTGGAGGCATGTT	59.934	20	TGTACAACGCATTGCTCAATTA	59.283	22	208	3250	3457	GAGTTCTGTTGCCGTGGATT	60.119	20	TGTACAACGCATTGCTCAATTA	59.283	22	221	3237	3457	GTTCTGTTGCCGTGGATTCT	60.119	20	TGTACAACGCATTGCTCAATTA	59.283	22	219	3239	3457
F01_transcript_1093	1	p1	(T)18	18	1004	1021	GAAGTTCCTTTCAAGCTGGC	59.056	20	ACCAAATTCTTGGACGCAAC	59.978	20	216	947	1162	CTTGCCCCGTAGCATTCATA	60.98	20	ACCAAATTCTTGGACGCAAC	59.978	20	197	966	1162	AGAAGTTCCTTTCAAGCTGGC	60.012	21	ACCAAATTCTTGGACGCAAC	59.978	20	217	946	1162
F01_transcript_1096	1	p2	(TC)6	12	42	53	TCTTGAGATTGTTCAAAGGCG	60.372	21	ACACAATTCCTCCACTTCGG	59.966	20	227	18	244	TCTTGAGATTGTTCAAAGGCG	60.372	21	AAAGATCTCTGCCTGCTCCA	60.096	20	129	18	146	TCTTGAGATTGTTCAAAGGCG	60.372	21	TTCTCGTCGGAGCTCTCAAT	60.096	20	263	18	280
F01_transcript_1096	2	p2	(TA)6	12	185	196	TGAATCTGGTTGTGGAGCAG	59.831	20	ACACAATTCCTCCACTTCGG	59.966	20	130	115	244	TGAATCTGGTTGTGGAGCAG	59.831	20	ATGCAGGATCCAACGAAGAC	60.081	20	261	115	375	TGAATCTGGTTGTGGAGCAG	59.831	20	GCAGGATCCAACGAAGACAT	60.081	20	259	115	373
F01_transcript_1098	1	p2	(TA)31	62	3273	3334	GCCTTTGCATCCGAAAGATA	60.175	20	AGCATATTCATTGTTCAACTCCA	58.642	23	273	3137	3409	GCCTTTGCATCCGAAAGATA	60.175	20	GCATATTCATTGTTCAACTCCAG	58.642	23	272	3137	3408	GCCTTTGCATCCGAAAGATA	60.175	20	GCATATTCATTGTTCAACTCCA	57.632	22	272	3137	3408
F01_transcript_1100	1	p2	(TA)6	12	330	341	GAAGCGAAATCGTCTCTTCG	60.096	20	TTTTGATTGGGGATTTTTGG	59.611	20	213	199	411	GCGAAATCGTCTCTTCGTTT	59.457	20	TTTTGATTGGGGATTTTTGG	59.611	20	210	202	411	GTGGAAGCGAAATCGTCTCT	59.434	20	TTTTGATTGGGGATTTTTGG	59.611	20	216	196	411
F01_transcript_1100	2	p1	(T)10	10	800	809	GGTTAACCCATGGTGTTGCT	59.717	20	CAGAAAGAGCCAAAGCGGTA	60.514	20	264	684	947	AGGCGCTGATTTATTTGCAT	59.71	20	CAGAAAGAGCCAAAGCGGTA	60.514	20	194	754	947	GGCGCTGATTTATTTGCATC	60.566	20	CAGAAAGAGCCAAAGCGGTA	60.514	20	193	755	947
F01_transcript_1104	1	p3	(TTA)6	18	3402	3419	--
F01_transcript_1105	1	p2	(AT)12	24	387	410	CCATTCCGTTCTCCAGACTC	59.655	20	GCGTCACCACAGATCTCTCA	59.988	20	247	240	486	CAAACCATTCCGTTCTCCAG	60.486	20	GCGTCACCACAGATCTCTCA	59.988	20	251	236	486	CCATTCCGTTCTCCAGACTC	59.655	20	TCTCTTCAGCGTCACCACAG	60.178	20	255	240	494
F01_transcript_1105	2	p1	(T)12	12	3364	3375	TGCAGCATCAAGGCTATGAC	59.979	20	TTACCTTCTTACTTACAAAGGTTGC	57.411	25	107	3298	3404	TTTGCAGCATCAAGGCTATG	59.976	20	TTACCTTCTTACTTACAAAGGTTGC	57.411	25	109	3296	3404	GTGCAGCTTTTGGTGTTTCA	59.888	20	TTACCTTCTTACTTACAAAGGTTGC	57.411	25	207	3198	3404
F01_transcript_1112	1	p1	(T)10	10	123	132	TCTGCTTTTTCTGCTCCGTT	60.132	20	ACAAAATCAAACCCACCTGC	59.836	20	280	92	371	CCAAAAACAGAGCCTTCTGC	59.993	20	TGAACAAAGCCAAACCCATT	60.344	20	171	77	247	CTCTCTCCCCACTTGCTCAC	59.986	20	TGAACAAAGCCAAACCCATT	60.344	20	195	53	247
F01_transcript_1112	2	p3	(GGC)6	18	1139	1156	TCTTTTCTCAATGATGGCCC	60.014	20	TAAAGACATGGCTTCCACCC	59.933	20	233	1039	1271	TCTTTTCTCAATGATGGCCC	60.014	20	CAGATATCGCTCACGGAACA	59.823	20	182	1039	1220	TCTTTTCTCAATGATGGCCC	60.014	20	TCTTCAGACCCCAAGCAGAT	59.803	20	197	1039	1235
F01_transcript_1112	3	p3	(CCA)10	30	2729	2758	CATCGGAATGTAGGTGCCTT	59.955	20	AAGAGAGAGGGATGAGGGGA	60.149	20	262	2610	2871	CATCGGAATGTAGGTGCCTT	59.955	20	AAAGAGAGAGGGATGAGGGG	59.63	20	263	2610	2872	CATCGGAATGTAGGTGCCTT	59.955	20	AGAGAGAGGGATGAGGGGAC	59.619	20	261	2610	2870
F01_transcript_1112	4	p3	(CAG)9	27	3100	3126	CTTGAAGTTTGGACCACAGC	58.342	20	TCAAATCAGCATTGTAGTTGCAC	60.187	23	276	2920	3195	ACTTGAAGTTTGGACCACAGC	59.247	21	TCAAATCAGCATTGTAGTTGCAC	60.187	23	277	2919	3195	CTTGAAGTTTGGACCACAGC	58.342	20	CAAATCAGCATTGTAGTTGCAC	58.372	22	275	2920	3194
F01_transcript_1119	1	p1	(A)10	10	162	171	CCCAGATACAGAACACCTCCA	59.974	21	TGGATAGGTCCGAATCGAAG	60.029	20	260	61	320	CCCAGATACAGAACACCTCCA	59.974	21	CCATGGCGTTTGATTTTTCT	59.938	20	188	61	248	CCCAGATACAGAACACCTCCA	59.974	21	ACCATGGCGTTTGATTTTTC	59.807	20	189	61	249
F01_transcript_1122	1	c	(A)11gg(A)11	24	3250	3273	GTTTGTTTGTTCCCCCTCAA	59.807	20	TTCCATGTTCATTTGTTTCACA	58.917	22	204	3193	3396	TTGTTTGTTCCCCCTCAAAC	59.807	20	TTCCATGTTCATTTGTTTCACA	58.917	22	202	3195	3396	GTTTGTTTGTTCCCCCTCAA	59.807	20	CTTCCATGTTCATTTGTTTCACA	59.89	23	205	3193	3397
F01_transcript_1124	1	p1	(T)10	10	194	203	ATTGTTGTCCTGCCCTTTTG	59.971	20	CAATCACAAACTTTGATGGGTAGA	60.269	24	228	38	265	ATTGTTGTCCTGCCCTTTTG	59.971	20	CAATCACAAACTTTGATGGGTAG	58.551	23	228	38	265	ATTGTTGTCCTGCCCTTTTG	59.971	20	CAATCACAAACTTTGATGGGTA	57.546	22	228	38	265
F01_transcript_1126	1	p6	(TTTTTG)6	36	3248	3283	CCACCGTCTGACCTTAGCAT	60.134	20	CCACCAACCCCTCCTACTTT	60.218	20	258	3124	3381	TGTTATGGGTGGTGAAGGCT	60.375	20	CCACCAACCCCTCCTACTTT	60.218	20	209	3173	3381	CCACCGTCTGACCTTAGCAT	60.134	20	CACCAAAAACCTTCAAACGC	60.514	20	237	3124	3360
F01_transcript_1128	1	p2	(CT)6	12	37	48	TAACCATCTCAGCACCACCA	60.112	20	GGGACTGATTGTCGTTTGCT	60.119	20	172	13	184	TCGTAACCATCTCAGCACCA	60.263	20	GGGACTGATTGTCGTTTGCT	60.119	20	175	10	184	TAACCATCTCAGCACCACCA	60.112	20	TTCCGATTGGGACTGATTGT	60.317	20	180	13	192
F01_transcript_1128	2	p1	(T)11	11	851	861	TGGGTGGATTTTCATCCAAG	60.692	20	TGCACCAGGACATGATTGAT	59.925	20	234	802	1035	GCTTCAGTCTGGGTGGATTT	59.141	20	TGCACCAGGACATGATTGAT	59.925	20	243	793	1035	GTGAGCTTCAGTCTGGGTGG	60.861	20	TGCACCAGGACATGATTGAT	59.925	20	247	789	1035
F01_transcript_1135	1	p3	(GAG)5	15	202	216	GATAACGGAATTGAAGGCGA	60.038	20	CTCTGGTACTTCAGCCTCGG	60.005	20	104	141	244	GATAACGGAATTGAAGGCGA	60.038	20	TTCCGAGGAAATCCAGAATG	60.006	20	226	141	366	TCCGTGTCCTTTTCCATCTC	60.05	20	CTCTGGTACTTCAGCCTCGG	60.005	20	220	25	244
F01_transcript_1139	1	p2	(GA)7	14	62	75	AGGATGAACAACAACCAGCA	59.139	20	TTGGGCTTGGAATTAGATCG	60.031	20	258	18	275	AGGATGAACAACAACCAGCA	59.139	20	GCTTTCTCATCTTCGCCATC	59.923	20	128	18	145	AGGATGAACAACAACCAGCA	59.139	20	TCCACTCCAAATGGGTCTTC	59.903	20	201	18	218
F01_transcript_1150	1	p2	(CT)6	12	87	98	TAAAATAGTCTACGCGCCCC	59.234	20	ATATCTGGCTCGATCGCTGT	59.826	20	197	52	248	TAAAATAGTCTACGCGCCCC	59.234	20	CGTGTTTGTGAAGCTTGTGG	60.338	20	116	52	167	TAAAATAGTCTACGCGCCCC	59.234	20	AATATCTGGCTCGATCGCTG	60.339	20	198	52	249
F01_transcript_1151	1	p2	(AG)30	60	3137	3196	GGGGCACCAAACTTATTCAA	59.801	20	AAGTGTTCCCACCGCATATC	59.82	20	140	3104	3243	ACCCTGAAGGGACATGTTGA	60.363	20	AAGTGTTCCCACCGCATATC	59.82	20	254	2990	3243	GTGAAGCTAAAAGGCCTGGA	59.452	20	AAGTGTTCCCACCGCATATC	59.82	20	227	3017	3243
F01_transcript_1153	1	p2	(AG)9	18	3176	3193	ATGGGCTTGACGTACCTGAC	59.997	20	CTCTTAAATTGCGCGTGTGA	60.014	20	246	2976	3221	ATGGGCTTGACGTACCTGAC	59.997	20	TCTTAAATTGCGCGTGTGAG	60.014	20	245	2976	3220	ACCGAAACAATTTCACGGAG	59.971	20	TCTTAAATTGCGCGTGTGAG	60.014	20	209	3012	3220
F01_transcript_1162	1	p2	(GA)11	22	1	22	--
F01_transcript_1162	2	p2	(GA)8	16	364	379	GGGGTTGTCTTGGTTGAAGA	59.943	20	ACCTCCTGTCTCGTGAGCAA	61.009	20	117	295	411	GGGGTTGTCTTGGTTGAAGA	59.943	20	CCTCCTGTCTCGTGAGCAA	60.121	19	116	295	410	ATTGGGGTTGTCTTGGTTGA	60.21	20	ACCTCCTGTCTCGTGAGCAA	61.009	20	120	292	411
F01_transcript_1162	3	p2	(TA)6	12	491	502	AGTTGAAGGTGCGTTTGCTC	60.44	20	TCCCTGTCTGCATAGAAAACAA	59.747	22	197	378	574	GAGTTGAAGGTGCGTTTGCT	60.44	20	TCCCTGTCTGCATAGAAAACAA	59.747	22	198	377	574	AGAGTTGAAGGTGCGTTTGC	60.44	20	TCCCTGTCTGCATAGAAAACAA	59.747	22	199	376	574
F01_transcript_1173	1	p1	(A)13	13	53	65	GCTGGCAAGTTACGCTGTTA	59.136	20	CCGGAGATAGGATTTCACCA	59.887	20	184	0	183	GCTGGCAAGTTACGCTGTTA	59.136	20	CTTCCCGGAGCTGTCATAAG	59.83	20	256	0	255	GCTGGCAAGTTACGCTGTTA	59.136	20	CAATCACTCCGAATGAAGCC	60.603	20	215	0	214
F01_transcript_1177	1	c	(CAGCAA)9catcaacaattacaaatgcagcagctcttaatgcagaggcatgctcagcaggctcaacaacagcagcaa(CAG)6caacaacaacagcaacaacagcagcaacagcagcagcaacagcaacaacaacaagca(CAG)6	216	643	858	AAACACAGCACCCACAACAA	60.049	20	CATTAGCTGTGCCATTCAGG	59.297	20	279	619	897	AAACACAGCACCCACAACAA	60.049	20	CCATTAGCTGTGCCATTCAG	59.297	20	280	619	898	AAACACAGCACCCACAACAA	60.049	20	TTAGCTGTGCCATTCAGGAG	59.024	20	277	619	895
F01_transcript_1185	1	p2	(CT)7	14	18	31	--
F01_transcript_1185	2	p3	(AGA)6	18	435	452	AAGAAAATTTTGCTCACGGG	59.202	20	AATTTCGACCAAACTGGCTG	60.11	20	198	316	513	GGGCTGAATTGAAGACCACA	61.046	20	AATTTCGACCAAACTGGCTG	60.11	20	181	333	513	TGTTTGTCGATTATTCCGCTC	60.089	21	AATTTCGACCAAACTGGCTG	60.11	20	267	247	513
F01_transcript_1198	1	p2	(AG)6	12	2140	2151	TGCTGGATATTGAGGTGCAG	59.823	20	TCAGCCCATTCTTTGTCTCTT	58.923	21	253	2056	2308	TGCTGGATATTGAGGTGCAG	59.823	20	CAGCCCATTCTTTGTCTCTTC	58.923	21	252	2056	2307	TGCTGGATATTGAGGTGCAG	59.823	20	TTCAGCCCATTCTTTGTCTCT	58.923	21	254	2056	2309
F01_transcript_1201	1	p2	(TA)6	12	323	334	TGCATCAACATTCAATCGGT	59.931	20	TGTTTCTGCTCCATCACTCG	59.984	20	218	159	376	CTGCATCAACATTCAATCGG	60.073	20	TGTTTCTGCTCCATCACTCG	59.984	20	219	158	376	TGCATCAACATTCAATCGGT	59.931	20	AAGCCCTACTCCTACCCCAA	59.955	20	261	159	419
F01_transcript_1201	2	p1	(T)10	10	2942	2951	GGACTGTCCTGGGAATCAAA	59.903	20	CCCAGCATTCCAATTACCAC	60.192	20	279	2917	3195	GGACTGTCCTGGGAATCAAA	59.903	20	CTTGCTGAGTCGAGCTTTCC	60.277	20	123	2917	3039	TGGAATGATTTGTATGGCGA	59.891	20	CTTGCTGAGTCGAGCTTTCC	60.277	20	238	2802	3039
F01_transcript_1202	1	p3	(CCG)6	18	135	152	GAGACTCCATCACCACCACC	60.383	20	TGGGAATGTATGTGAGGGGT	60.05	20	189	98	286	GAGACTCCATCACCACCACC	60.383	20	CTGGGAATGTATGTGAGGGG	60.187	20	190	98	287	GAGACTCCATCACCACCACC	60.383	20	ATGTATGTGAGGGGTTTGCC	59.676	20	184	98	281
F01_transcript_1206	1	p1	(T)10	10	2515	2524	TGAATTTTCAGTGCCTTGGA	59.247	20	TGCACACATGGAGATGGACT	60.121	20	267	2338	2604	TGAATTTTCAGTGCCTTGGA	59.247	20	CACACATGGAGATGGACTGC	60.121	20	265	2338	2602	TGAATTTTCAGTGCCTTGGA	59.247	20	GCACACATGGAGATGGACTG	60.121	20	266	2338	2603
F01_transcript_1208	1	p3	(GGA)6	18	173	190	ACGACGACGATGATCTGGA	60.222	19	TTCTTCATCCTCCTCCGCTA	59.91	20	137	150	286	GACGACGACGATGATCTGG	60.222	19	TTCTTCATCCTCCTCCGCTA	59.91	20	138	149	286	ACGACGACGATGATCTGGAG	61.251	20	TTCTTCATCCTCCTCCGCTA	59.91	20	137	150	286
F01_transcript_1226	1	c	(CAGCAA)6cttaatgcagagcagcaacatcaacaattacaaatgcagcagctcttaatgcagaggcatgctcagcaggctcaacaacagcagcaa(CAG)6caacaacaacagcaacaacagcagcaacagcagcagcaacagcaacaacaacaagca(CAG)6	216	643	858	AAACACAGCACCCACAACAA	60.049	20	CATTAGCTGTGCCATTCAGG	59.297	20	279	619	897	AAACACAGCACCCACAACAA	60.049	20	CCATTAGCTGTGCCATTCAG	59.297	20	280	619	898	AAACACAGCACCCACAACAA	60.049	20	TTAGCTGTGCCATTCAGGAG	59.024	20	277	619	895
F01_transcript_1230	1	p2	(AG)9	18	45	62	CTCTTGCTAGCTCCACCAGC	60.299	20	GGGTTGGACGATGATGAAAG	60.317	20	196	16	211	CTCTTGCTAGCTCCACCAGC	60.299	20	CATATGTGGGTTGGACGATG	59.648	20	203	16	218	CTCTTGCTAGCTCCACCAGC	60.299	20	TGTGACCAATGATGCAATGA	59.469	20	175	16	190
F01_transcript_1233	1	p2	(CT)6	12	3029	3040	TTTTGGGGGTGTGCTAACTC	59.971	20	AATATGGAAGAGGCAGCTCG	59.434	20	181	2979	3159	GGGGGTGTGCTAACTCAGAA	60.111	20	AATATGGAAGAGGCAGCTCG	59.434	20	177	2983	3159	TTCTGACATTTTGGGGGTGT	60.21	20	AATATGGAAGAGGCAGCTCG	59.434	20	189	2971	3159
F01_transcript_1241	1	p1	(T)12	12	3033	3044	AGGCAGCTCGTCAAGAAAGA	60.277	20	CGGGGATAGCATGGAACTAA	59.916	20	190	2939	3128	AGGCAGCTCGTCAAGAAAGA	60.277	20	TCGAGTGCAAACCCACATAA	60.111	20	247	2939	3185	AGGCAGCTCGTCAAGAAAGA	60.277	20	ATGTTCTCGAGTGCAAACCC	60.119	20	253	2939	3191
F01_transcript_1246	1	p3	(TAT)6	18	3213	3230	AGGTCACGGAGATTTGATCG	60.073	20	GAACATGTAGGCTCCAATCCA	59.947	21	183	3098	3280	AGGTCACGGAGATTTGATCG	60.073	20	CATGTAGGCTCCAATCCAAAA	59.946	21	180	3098	3277	AGGTCACGGAGATTTGATCG	60.073	20	ACACATACCGCCTCAACTCG	61.116	20	235	3098	3332
F01_transcript_1251	1	p3	(TTC)5	15	145	159	CTTTTCACTCCCCGATTTCA	60.044	20	CTCGGTGTCTTCTTCTTGGG	59.837	20	180	118	297	CTTTTCACTCCCCGATTTCA	60.044	20	TCGGTGTCTTCTTCTTGGGT	59.697	20	179	118	296	GCCTGCAGGACATGAAAGAT	60.226	20	AGCTCTGAATTTGAGCGAGC	59.866	20	230	10	239
F01_transcript_1252	1	p2	(AG)8	16	11	26	--
F01_transcript_1254	1	p2	(AG)7	14	1	14	--
F01_transcript_1254	2	p1	(T)10	10	1229	1238	CCTAGGTGCTAGGCCTCCTT	59.864	20	GGGAAAATCAAATGGAGCAA	59.878	20	260	1128	1387	CCTAGGTGCTAGGCCTCCTT	59.864	20	AATTATATGGGGCTGCGTTG	59.816	20	239	1128	1366	CCTAGGTGCTAGGCCTCCTT	59.864	20	GCGGTAATGGGAAAATCAAA	59.773	20	268	1128	1395
F01_transcript_1254	3	p3	(CAT)7	21	2657	2677	TTTTAGAAGCCGTCCCAGAA	59.817	20	ATCCTTTGTGGGAAGCAATG	59.933	20	280	2560	2839	TTTTAGAAGCCGTCCCAGAA	59.817	20	AAGTGCCCCAAAACAACAAC	59.875	20	202	2560	2761	TTTTAGAAGCCGTCCCAGAA	59.817	20	AATGTCGTTCGGGAATCAAA	60.309	20	264	2560	2823
F01_transcript_1256	1	p3	(CAG)5	15	318	332	CCCTCGTGTTCCATGAATTT	59.79	20	ACTCCAATTTAGGGGCGAGT	59.962	20	228	201	428	CCCTCGTGTTCCATGAATTT	59.79	20	TCCGATTTCAGTAGGAACGG	60.066	20	190	201	390	CCCTCGTGTTCCATGAATTT	59.79	20	CAATTTAGGGGCGAGTTTGA	60.067	20	224	201	424
F01_transcript_1257	1	p1	(T)10	10	198	207	GGGTTCCCACTTTTTGAGATT	59.316	21	GGGGTGGATAATACACGATGTT	59.841	22	280	82	361	GGGTTCCCACTTTTTGAGATT	59.316	21	GGGGTGGATAATACACGATG	57.61	20	280	82	361	GGGTTCCCACTTTTTGAGAT	57.946	20	GGGGTGGATAATACACGATGTT	59.841	22	280	82	361
F01_transcript_1261	1	c	(CCA)12cttagagttaaactttgagggggc(A)11	71	2136	2206	CACCTATCTCGACCCCACAT	59.803	20	CAATTTAGAAGGCAGAACTAGAATGA	59.42	26	161	2111	2271	CACCACCACCTATCTCGACC	60.386	20	CAATTTAGAAGGCAGAACTAGAATGA	59.42	26	167	2105	2271	CTCTTTTTGCCCAGAGCCTA	59.587	20	CAATTTAGAAGGCAGAACTAGAATGA	59.42	26	270	2002	2271
F01_transcript_1261	2	p4	(CCAC)5	20	2441	2460	TTCGTCTCTGCTGGATTTTT	57.546	20	ACAACATTTTACTGATTTACCCCT	57.241	24	258	2400	2657	AATTCGTCTCTGCTGGATTTTT	59.268	22	ACAACATTTTACTGATTTACCCCT	57.241	24	260	2398	2657	AAATTCGTCTCTGCTGGATTTT	59.268	22	ACAACATTTTACTGATTTACCCCT	57.241	24	261	2397	2657
F01_transcript_1263	1	p3	(TGC)5	15	3184	3198	CCTTTGCCGCAAGAGATATT	59.32	20	CAAAGGAGATGTTTGGTCGTC	59.583	21	278	2946	3223	GCAAGAAAGAATCGAAACAGG	58.962	21	CGGGAACAAAACCTAGCAGA	60.241	20	174	3081	3254	GCAAGAAAGAATCGAAACAGG	58.962	21	CTCGGGAACAAAACCTAGCA	60.241	20	176	3081	3256
F01_transcript_1268	1	p1	(T)11	11	3332	3342	--
F01_transcript_1270	1	p5	(CACCA)6	30	23	52	GAGGGTTGCAGCAGATAAAC	57.419	20	AAGCGCCCATTGTTACAGTC	60.14	20	176	0	175	GAGGGTTGCAGCAGATAAAC	57.419	20	ATGAGCTTGAACAGGTTGGC	60.263	20	213	0	212	GAGGGTTGCAGCAGATAAAC	57.419	20	CGCCCATTGTTACAGTCAGA	59.716	20	173	0	172
F01_transcript_1272	1	p3	(AGG)5	15	3173	3187	CCCGAAAGCAAGCTAAAATG	59.847	20	AAAAGGCATCAAACCACTGC	60.118	20	182	3147	3328	GTAAGATGGGCTCGAGGGTT	60.464	20	AAAAGGCATCAAACCACTGC	60.118	20	266	3063	3328	TCCAAGTTGAGGATTGCTGA	59.369	20	AAAAGGCATCAAACCACTGC	60.118	20	217	3112	3328
F01_transcript_1291	1	p2	(CT)6	12	66	77	TTGCAGACTTAACCGACTGC	59.076	20	ATCCGAGTGAGATCGAATGG	60.034	20	217	11	227	TTGCAGACTTAACCGACTGC	59.076	20	CTGTGCTGAAATTGGGGATT	59.933	20	258	11	268	TTGCAGACTTAACCGACTGC	59.076	20	AATCCCTGTGCTGAAATTGG	59.933	20	263	11	273
F01_transcript_1292	1	p2	(TA)13	26	3173	3198	GAGTGAGGGACAGCCTCAAG	59.986	20	TCTCCTTGTTCAGCCCAATC	60.195	20	275	2980	3254	AGAGTGAGGGACAGCCTCAA	59.986	20	TCTCCTTGTTCAGCCCAATC	60.195	20	276	2979	3254	AGTGAGGGACAGCCTCAAGA	59.986	20	TCTCCTTGTTCAGCCCAATC	60.195	20	274	2981	3254
F01_transcript_1294	1	p2	(TA)9	18	2304	2321	CGAGGGTGGTTATGAATCTG	58.02	20	GGAGAAACCACGTGAAAAATG	59.462	21	236	2265	2500	AAAATCTTAGGAGGGCAGGC	59.688	20	CGCAATTACAGTTTGATTGACA	58.749	22	249	2152	2400	AAAATCTTAGGAGGGCAGGC	59.688	20	CGCAATTACAGTTTGATTGACAG	59.698	23	249	2152	2400
F01_transcript_1294	2	p2	(TG)6	12	3070	3081	CTGTCGCTTTGGTGTTGTGT	59.794	20	CATTACATGCGTCCCCTCTT	59.955	20	167	3030	3196	ACTGTCGCTTTGGTGTTGTG	59.794	20	CATTACATGCGTCCCCTCTT	59.955	20	168	3029	3196	CTGTCGCTTTGGTGTTGTGT	59.794	20	TTACATGCGTCCCCTCTTTC	60.074	20	165	3030	3194
F01_transcript_1298	1	p2	(AG)8	16	23	38	--
F01_transcript_1301	1	p2	(AT)8	16	3188	3203	GCAGGTGAAGCTAAGTTGCC	60.022	20	TTTCATACCATACAGATGTAAAAGCA	59.08	26	192	3122	3313	CAGGACAAGCTTCCTCTTGC	60.134	20	TTTCATACCATACAGATGTAAAAGCA	59.08	26	266	3048	3313	GCAGGTGAAGCTAAGTTGCC	60.022	20	TCATACCATACAGATGTAAAAGCATGT	60.095	27	190	3122	3311
F01_transcript_1304	1	c	(T)11atttgcttctttttgtactgtgtgaaa(AC)7	52	685	736	TTCTCGTGCCATGATTTGAC	59.654	20	GACAAACAGCCATCACCCTT	59.973	20	262	576	837	TCGTGCCATGATTTGACTTC	59.654	20	GACAAACAGCCATCACCCTT	59.973	20	259	579	837	TTCTCGTGCCATGATTTGAC	59.654	20	CAAACAGCCATCACCCTTTT	59.971	20	260	576	835
F01_transcript_1308	1	p3	(TTC)5	15	163	177	CTTTTCACTCCCGGATTTCA	60.044	20	AGCTCTGAATTTGAGCGAGC	59.866	20	123	136	258	CTTTTCACTCCCGGATTTCA	60.044	20	CTCGGTGTCTTCTTCTTGGG	59.837	20	180	136	315	GCCTGCAGGACATGAAAGTT	60.263	20	CCCGAAAAGTTTTGGTGAAA	59.947	20	186	20	205
F01_transcript_1320	1	p2	(AT)7	14	3015	3028	TGTGGGTGATTAGTGAGGCA	60.112	20	CCAAAATTCTGCATCCTGCT	60.214	20	239	2920	3158	TGTGGGTGATTAGTGAGGCA	60.112	20	AGCCAAAATTCTGCATCCTG	60.214	20	241	2920	3160	AAAGTGCCGTGATTTGAACC	59.978	20	TACAGCCAGCACTCTTTCCC	60.397	20	262	2858	3119
F01_transcript_1320	2	p1	(A)10	10	3260	3269	--
F01_transcript_1322	1	p2	(AT)17	34	149	182	GGGATTCTGGATATTCGGGT	59.981	20	TCGGTTGCTTCAATTTTTCC	60.053	20	241	69	309	GGGATTCTGGATATTCGGGT	59.981	20	ATGCAGAATTGAAACCCCAG	59.933	20	157	69	225	GGGATTCTGGATATTCGGGT	59.981	20	CACCTCGGTTGCTTCAATTT	60.11	20	245	69	313
F01_transcript_1337	1	c	(C)17(A)25	42	173	214	TGCCATTTGATCTTCCTGTG	59.648	20	ATTTAGAGCTGTTCCCACGC	59.34	20	242	47	288	TGCCATTTGATCTTCCTGTG	59.648	20	TTAGAGCTGTTCCCACGCAT	60.796	20	240	47	286	TGCCATTTGATCTTCCTGTG	59.648	20	CGTTTTGCAGCTTCAACTGT	59.123	20	277	47	323
F01_transcript_1342	1	p2	(TA)7	14	37	50	GGGCTGGAACTAGAATTCATTA	57.411	22	AATGGGGAACCAAATGAACA	60.029	20	255	0	254	GGGCTGGAACTAGAATTCATTA	57.411	22	CATCATCATGTGAATGGGGA	60.137	20	267	0	266	GGGCTGGAACTAGAATTCATTA	57.411	22	TTTTCCTTCCACAATCCCAC	59.767	20	230	0	229
F01_transcript_1346	1	p4	(CTGG)6	24	28	51	GGAAGTGAGAACCTGTCAATATCT	57.856	24	AAACAGTCGAGAAAAGGGGAA	60.096	21	188	0	187	GGAAGTGAGAACCTGTCAATATCT	57.856	24	AAAACAGTCGAGAAAAGGGGA	60.096	21	189	0	188	GGAAGTGAGAACCTGTCAATATCT	57.856	24	AACAGTCGAGAAAAGGGGAA	58.764	20	187	0	186
F01_transcript_1347	1	p2	(AT)10	20	546	565	TGCAAGTGTTTTCTGCATGG	60.844	20	GAGCTCAAGTCTTTCCCCCT	59.817	20	219	464	682	TGCAAGTGTTTTCTGCATGG	60.844	20	GCTCAAGTCTTTCCCCCTTT	59.691	20	217	464	680	GCAAGTGTTTTCTGCATGGT	58.777	20	GAGCTCAAGTCTTTCCCCCT	59.817	20	218	465	682
F01_transcript_1353	1	p1	(A)11	11	47	57	TTTCAAGAAAATAGGGTTCATTCA	59.067	24	AAGGTAAGAGACAGCGCGAG	59.78	20	172	6	177	TTTCAAGAAAATAGGGTTCATTCA	59.067	24	AATTCCTAGGGTTTTCGGGA	59.772	20	137	6	142	TTTCAAGAAAATAGGGTTCATTCA	59.067	24	TTCCTAGGGTTTTCGGGAAT	59.772	20	135	6	140
F01_transcript_1357	1	p2	(TC)6	12	49	60	GAATAAAATATAACACGTACTCCCCC	59.416	26	ATACAAGCTCTGCGCGCTAT	60.167	20	170	14	183	AATAAAATATAACACGTACTCCCCC	57.946	25	ATACAAGCTCTGCGCGCTAT	60.167	20	169	15	183	TGAATAAAATATAACACGTACTCCCC	58.791	26	ATACAAGCTCTGCGCGCTAT	60.167	20	171	13	183
F01_transcript_1359	1	p3	(AGA)5	15	1058	1072	TAAAGAGGTGGACGTGGAGG	60.103	20	TCCCCAATGCAAGTAACACA	59.964	20	225	1001	1225	TAAAGAGGTGGACGTGGAGG	60.103	20	CTTCTGGCATTGAACCCATT	59.933	20	197	1001	1197	TAAAGAGGTGGACGTGGAGG	60.103	20	AACACATTTTCGCCCTTCTG	60.11	20	211	1001	1211
F01_transcript_1359	2	p1	(T)11	11	3196	3206	GAGTGTCAACAGACGAGGCA	60.03	20	AAAAATCACCACATGCGTCA	59.972	20	277	2963	3239	CAACAGACGAGGCATTCAAA	59.84	20	AAAAATCACCACATGCGTCA	59.972	20	271	2969	3239	GTCAACAGACGAGGCATTCA	59.837	20	AAAAATCACCACATGCGTCA	59.972	20	273	2967	3239
F01_transcript_1363	1	p6	(CAGCAA)6	36	623	658	CTCAGCAACAGCAGCAAGAG	60.072	20	GCATTAGCAGTTCCCGTGTT	60.14	20	241	557	797	CTCAGCAACAGCAGCAAGAG	60.072	20	TGTAGCCATGGCATTAGCAG	59.856	20	251	557	807	CTCAGCAACAGCAGCAAGAG	60.072	20	GCAGTTCCCGTGTTTTGTCT	60.156	20	235	557	791
F01_transcript_1378	1	p1	(A)26	26	67	92	AGGGGTTTCAAGCCATCTCT	60.074	20	TCTTCAAAGGAAAACCACCG	60.081	20	178	17	194	AGGGGTTTCAAGCCATCTCT	60.074	20	AAGAAGATGGGTTGTGGTGG	59.82	20	274	17	290	AGGGGTTTCAAGCCATCTCT	60.074	20	GAAGATGGGTTGTGGTGGTT	59.679	20	272	17	288
F01_transcript_1383	1	p2	(CT)14	28	137	164	GCTTCAACGTCCCATTCATT	59.939	20	TAAAAGCGGCCATGGTTTAC	59.964	20	247	84	330	ACTGCTTCAACGTCCCATTC	60.119	20	TAAAAGCGGCCATGGTTTAC	59.964	20	250	81	330	GCTTCAACGTCCCATTCATT	59.939	20	AAATTCGGTGCGAACAAAAG	60.11	20	178	84	261
F01_transcript_1392	1	p2	(AT)9	18	184	201	TGGTCCAATCCAGTCTTGTTC	59.958	21	ACCCCAACCTGCTAAATTCC	60.187	20	251	28	278	CACAAGCACCAACACAGATTG	60.206	21	TTACGCCCCTTCAACAAAAC	59.975	20	211	103	313	TGGTCCAATCCAGTCTTGTTC	59.958	21	TTCAACAAAACCCACCATCA	59.792	20	277	28	304
F01_transcript_1393	1	p4	(GAAG)6	24	1	24	--
F01_transcript_1395	1	p3	(CAG)8	24	2844	2867	AAGGTGCGTGAAGAGGAAGA	59.989	20	CCGAAACTTGGGCACATACT	59.993	20	273	2641	2913	GGTGCGTGAAGAGGAAGAAG	59.989	20	CCGAAACTTGGGCACATACT	59.993	20	271	2643	2913	AGGTGCGTGAAGAGGAAGAA	59.989	20	CCGAAACTTGGGCACATACT	59.993	20	272	2642	2913
F01_transcript_1396	1	p2	(AT)8	16	318	333	GAGAGGTACCAGATCCAGCG	59.827	20	CTCCCTAAAACGGAATGCAG	59.702	20	273	105	377	CGTAATCGTGAGTGGTCGTG	60.175	20	CTCCCTAAAACGGAATGCAG	59.702	20	193	185	377	ACAGCACCTCGCCAACTTAT	59.763	20	TTAGTCAAAGAAGTGCCCCG	60.241	20	250	248	497
F01_transcript_1396	2	p2	(GA)7	14	3154	3167	ACGAGCTCGAATGGAGAAGA	60.096	20	AAGTCTGACAAGTTCGTGCTTC	58.653	22	258	3031	3288	TAGGTAAGCCGCCAGCTATG	60.376	20	AAGTCTGACAAGTTCGTGCTTC	58.653	22	174	3115	3288	ACGAGCTCGAATGGAGAAGA	60.096	20	TCTGACAAGTTCGTGCTTCTAAA	59.21	23	255	3031	3285
F01_transcript_13985	1	p1	(T)10	10	1731	1740	CCTGTGCGGTAAGGTCATTT	59.993	20	AACATCCACAAAGTTTCTACACC	57.219	23	238	1529	1766	AACCACTACAACCAGCAGCC	60.179	20	AACATCCACAAAGTTTCTACACC	57.219	23	256	1511	1766	ACCACTACAACCAGCAGCCT	59.792	20	AACATCCACAAAGTTTCTACACC	57.219	23	255	1512	1766
F01_transcript_13987	1	p3	(GAT)5	15	940	954	TGTATCACCTGTGGAAGGCA	60.112	20	GTCGGAACAAGAGGACCAAA	60.088	20	132	902	1033	TATCACCTGTGGAAGGCACA	60.112	20	GTCGGAACAAGAGGACCAAA	60.088	20	130	904	1033	ATGGCTTGTTGGGAGCTAGA	59.836	20	GTCGGAACAAGAGGACCAAA	60.088	20	176	858	1033
F01_transcript_13987	2	p2	(AT)27	54	1683	1736	TGCATGAAGGTATGCCGATA	60.058	20	AGCCAGCCATTCTTGTTCAC	60.263	20	198	1651	1848	TGCATGAAGGTATGCCGATA	60.058	20	TAGCCAGCCATTCTTGTTCA	59.42	20	199	1651	1849	TGCATGAAGGTATGCCGATA	60.058	20	TCCAAACCTATAGCCAGCCA	60.597	20	209	1651	1859
F01_transcript_14005	1	c	(AT)6(GT)15	42	1532	1573	GACGGATGTACTCCCCTTGA	59.927	20	CTGAATCAAATTGGTGTGCG	60.111	20	149	1482	1630	TGTCAAGGTTTTTGCCATCA	60.088	20	CTGAATCAAATTGGTGTGCG	60.111	20	242	1389	1630	GACGGATGTACTCCCCTTGA	59.927	20	CGCTCGTTAAGTTGGGGTAG	59.763	20	131	1482	1612
F01_transcript_14014	1	p3	(CCA)10	30	72	101	TCAGCCACAAGCAGAGGTTA	59.591	20	ATTGCGGGTGAATTTCTGTC	59.939	20	242	33	274	TCAGCCACAAGCAGAGGTTA	59.591	20	GGGTTTGTTGTTGATGGACC	60.073	20	113	33	145	TCAGCCACAAGCAGAGGTTA	59.591	20	GGTGTAGCTGCGGGATAAAA	60.096	20	174	33	206
F01_transcript_14018	1	p3	(ATC)5	15	59	73	TTGAACCAAAAAGGTGATTGA	58.107	21	ATGCTCCCTTTGCTTGAGAA	59.955	20	275	26	300	TTGATTGAACCAAAAAGGTGA	58.107	21	ATGCTCCCTTTGCTTGAGAA	59.955	20	279	22	300	TTGAACCAAAAAGGTGATTGA	58.107	21	AGGGCAGAAAAACTCCGATT	60.074	20	159	26	184
F01_transcript_14024	1	p2	(TA)21	42	1616	1657	GTTCCTCGGCATGAACTGAT	60.081	20	TGCACAGTCTCCTCTCCTGT	58.535	20	206	1548	1753	CTTTAGGCATTGTTCCTCGG	59.702	20	TGCACAGTCTCCTCTCCTGT	58.535	20	217	1537	1753	CCTTTAGGCATTGTTCCTCG	59.702	20	TGCACAGTCTCCTCTCCTGT	58.535	20	218	1536	1753
F01_transcript_14028	1	p2	(AG)8	16	63	78	GAGATCGATTGAGGAGGTGC	59.768	20	ATGGATTCGGACTTGTGAGG	59.927	20	218	0	217	GAGATCGATTGAGGAGGTGC	59.768	20	TTTTCGCGAGAGATGGATTC	60.296	20	230	0	229	GAGATCGATTGAGGAGGTGC	59.768	20	GTAAGTCATTCCTGCAGCCC	59.7	20	147	0	146
F01_transcript_14032	1	p3	(TGC)6	18	1321	1338	CTGTTGCTGCTGCAATTGTT	60.058	20	GCATCCAGGCTCTACAGGTC	59.834	20	222	1254	1475	GCTGCTGCAATTGTTGTTGT	59.918	20	GCATCCAGGCTCTACAGGTC	59.834	20	217	1259	1475	GTTGCTGCTGCAATTGTTGT	59.918	20	GCATCCAGGCTCTACAGGTC	59.834	20	220	1256	1475
F01_transcript_14036	1	c	(GA)10cagagagagtattaagcagtagcagcagaagcagcagcg(ATA)5	74	6	79	--
F01_transcript_14038	1	p3	(GAG)5	15	717	731	TGGAGCTGACAACGTTCTTG	60.025	20	TTCCAAGGTTTTGGGAACTG	59.942	20	199	621	819	AGAAGATCACTTTTGGGCGA	59.813	20	TTCCAAGGTTTTGGGAACTG	59.942	20	127	693	819	GAGAAGATCACTTTTGGGCG	59.813	20	TTCCAAGGTTTTGGGAACTG	59.942	20	128	692	819
F01_transcript_14038	2	p1	(A)10	10	1745	1754	TTGGGGAGCCAAGTATTTCA	60.439	20	AACAGTTGACATGGAGCACA	57.64	20	277	1509	1785	TGGGGAGCCAAGTATTTCAA	60.439	20	AACAGTTGACATGGAGCACA	57.64	20	276	1510	1785	CGACCAACCAAGAAAGGATG	60.486	20	AACAGTTGACATGGAGCACA	57.64	20	168	1618	1785
F01_transcript_14057	1	c	(AG)14gtaggcatatataattatatacctactagtctacttcttcttgtgtctgcgtagatatacagagaaagaagttgagtgttagagattggttatgcggagg(GA)8	144	78	221	TGAGATTGGAAAAAGAAAAAGGA	59.256	23	CCAGATCCCTCTCCTAACCC	59.89	20	244	33	276	TGAGATTGGAAAAAGAAAAAGGAG	60.101	24	CCAGATCCCTCTCCTAACCC	59.89	20	244	33	276	TTGAGATTGGAAAAAGAAAAAGG	58.827	23	CCAGATCCCTCTCCTAACCC	59.89	20	245	32	276
F01_transcript_14060	1	p1	(T)13	13	1634	1646	TGGTTGGTGCAAACTTGTCT	59.187	20	TCAACGGATAACTTGGCCTC	60.074	20	272	1538	1809	TGCAAACTTGTCTTCAGCAAA	59.641	21	TCAACGGATAACTTGGCCTC	60.074	20	265	1545	1809	GGTTGGTGCAAACTTGTCTTC	59.63	21	TCAACGGATAACTTGGCCTC	60.074	20	271	1539	1809
F01_transcript_14067	1	p2	(TC)6	12	916	927	CGGAGTAGGCAATTCCTCAG	59.83	20	GCGTGATAACCGGACACTTT	60	20	279	806	1084	GAAATCACCGGAGTAGGCAA	60.074	20	ACCGGACACTTTGGACTCAG	60.151	20	279	798	1076	CGGAGTAGGCAATTCCTCAG	59.83	20	ACCGGACACTTTGGACTCAG	60.151	20	271	806	1076
F01_transcript_14073	1	p1	(C)17	17	719	735	CCCATACAACAGTGATGGCA	60.39	20	TGTTCTGCTACCAGGCCTCT	60.012	20	250	618	867	GATGGCAGACATCATCCAGA	59.591	20	TGTTCTGCTACCAGGCCTCT	60.012	20	237	631	867	CCCATACAACAGTGATGGCA	60.39	20	TCGATCAACGTTGCTACCAG	59.864	20	178	618	795
F01_transcript_14085	1	p2	(TC)6	12	19	30	--
F01_transcript_14086	1	p2	(TC)6	12	47	58	CCACTTCCAAAACCTCATCA	58.541	20	TGATAATGGTGGTGCGTCAT	59.805	20	132	1	132	CCACTTCCAAAACCTCATCA	58.541	20	TTTTGAAAGGAAAGTTGCCG	60.215	20	113	1	113	CCACTTCCAAAACCTCATCA	58.541	20	CGGGAGAAAATCATTGGATG	60.266	20	167	1	167
F01_transcript_14089	1	p3	(CTT)10	30	41	70	TGTAAAACCTCTTTGTTTTCCC	57.358	22	GACAACTATGGTGGGATGGG	60.05	20	180	16	195	CTGTAAAACCTCTTTGTTTTCCC	58.305	23	GACAACTATGGTGGGATGGG	60.05	20	181	15	195	TGTAAAACCTCTTTGTTTTCCC	57.358	22	TAAACAAAGCCGGAATCTCG	60.202	20	266	16	281
F01_transcript_14105	1	p2	(AT)6	12	614	625	GGAGGCCATTGCCTAAAAAT	60.28	20	CTCCAGTAACACATTCACATCCA	59.906	23	250	482	731	GGAGGCCATTGCCTAAAAAT	60.28	20	TCCAGTAACACATTCACATCCA	58.9	22	249	482	730	GGAGGCCATTGCCTAAAAAT	60.28	20	TCCAGTAACACATTCACATCCAC	59.772	23	249	482	730
F01_transcript_14107	1	p1	(T)11	11	443	453	GGTCAAAACCCTAGATCAACCA	60.221	22	ACGAGGAGCAAAAACGAAAA	59.861	20	213	270	482	GGTCAAAACCCTAGATCAACCA	60.221	22	CGAGGAGCAAAAACGAAAAA	60.348	20	212	270	481	CGGTCAAAACCCTAGATCAAC	58.566	21	ACGAGGAGCAAAAACGAAAA	59.861	20	214	269	482
F01_transcript_14109	1	c	(AT)10(AG)9	38	12	49	--
F01_transcript_14109	2	p3	(TTC)6	18	184	201	GAGGAGGCCATTTTCATCAG	59.629	20	GGTTGCTAAGGAGGCAACAA	60.249	20	172	155	326	AGGCCATTTTCATCAGCAAT	59.533	20	GGTTGCTAAGGAGGCAACAA	60.249	20	168	159	326	GAGGAGGCCATTTTCATCAG	59.629	20	AAATGGTGTTTCCTGGGATG	59.647	20	208	155	362
F01_transcript_14109	3	p3	(CTA)6	18	720	737	CTCCTTCTTCCGGCAACATA	60.206	20	GATTCTAGCCGAATCCACCA	60.036	20	272	596	867	AGGAACTTTCCGTGCATCAG	60.255	20	GATTCTAGCCGAATCCACCA	60.036	20	241	627	867	TGCAGGGTGTGAGTTTCAAG	59.873	20	CGAAGAGGATGTCCCTGAAG	59.797	20	264	554	817
F01_transcript_14110	1	p2	(GT)8	16	839	854	GCATTCTTAATGAAATTGGGTTG	59.741	23	TCCAAGAACCAGAAGGATGG	60.042	20	235	671	905	GCATTCTTAATGAAATTGGGTTG	59.741	23	GGCTCAAAGAATTGCAGAGC	60.103	20	217	671	887	GCATTCTTAATGAAATTGGGTTG	59.741	23	GAACCAGAAGGATGGCTCAA	60.195	20	230	671	900
F01_transcript_14111	1	p2	(TC)16	32	99	130	TGCCTATTAATTTCTACCTTATTTCCA	59.736	27	AAAATGGCACAACCAAAAGC	59.982	20	211	35	245	TGCCTATTAATTTCTACCTTATTTCCA	59.736	27	GGCACAACCAAAAGCAAACT	60.154	20	206	35	240	AATTTCTACCTTATTTCCACCATACA	58.466	26	AAAATGGCACAACCAAAAGC	59.982	20	203	43	245
F01_transcript_14117	1	p1	(A)10	10	7	16	--
F01_transcript_14124	1	p4	(GTTT)5	20	1492	1511	CTTTCAACACCTGGTTCCGT	60.005	20	CCACACGAGTCTCCTTTTCA	58.852	20	186	1411	1596	CTTTCAACACCTGGTTCCGT	60.005	20	CATCCGTCCAATATCCACAG	58.797	20	157	1411	1567	CTTTCAACACCTGGTTCCGT	60.005	20	CCACACGAGTCTCCTTTTCAC	59.754	21	186	1411	1596
F01_transcript_14135	1	p2	(AC)10	20	4	23	--
F01_transcript_14142	1	p3	(AGC)10	30	478	507	ATGGAGGGTCATCAGGGAG	59.862	19	CCAGTTTCAACAAGCCCATT	59.971	20	223	454	676	ATGGAGGGTCATCAGGGAG	59.862	19	CAACAGCAGACCCAGTTTCA	59.873	20	234	454	687	ATGGAGGGTCATCAGGGAG	59.862	19	CAGCAGACCCAGTTTCAACA	59.873	20	231	454	684
F01_transcript_14145	1	c	(A)11gagagagcagcgaggagtaggagaagggaaaagaaagaagaaagaggagtatagcgtagaagagatgaaggataaaaa(AGG)7	110	93	202	TGACACTAGTAGAGGGCGGG	60.269	20	AGAGAGGGCCAAACAAGGTT	60.11	20	231	67	297	TGACACTAGTAGAGGGCGGG	60.269	20	CCCCATCGACAAGAGAGAGA	60.34	20	246	67	312	TGACACTAGTAGAGGGCGGG	60.269	20	GACAAGAGAGAGAGGGCCAA	59.53	20	239	67	305
F01_transcript_14150	1	p1	(T)11	11	495	505	TAAGGGCTTCGATTTGGATG	60.031	20	ACACAAATTGGCATGGGATT	60.059	20	245	363	607	TAAGGGCTTCGATTTGGATG	60.031	20	AACACAAATTGGCATGGGAT	60.059	20	246	363	608	TAAGGGCTTCGATTTGGATG	60.031	20	TGGCAAGGGGTTATCTTGTC	59.933	20	278	363	640
F01_transcript_14157	1	p2	(TA)22	44	1611	1654	CAATGGAGCCACAGCTACAA	59.864	20	AACTGTGATACGTACATCCCTTTT	58.106	24	196	1486	1681	ACCAATGGAGCCACAGCTAC	60.142	20	AACTGTGATACGTACATCCCTTTT	58.106	24	198	1484	1681	AGAGACCAATGGAGCCACAG	60.261	20	AACTGTGATACGTACATCCCTTTT	58.106	24	202	1480	1681
F01_transcript_14179	1	p1	(G)14	14	55	68	AGAGCATGGAGAGAGAGGGG	60.891	20	AACTGGATGTACCACCACGG	60.69	20	209	30	238	GAGCATGGAGAGAGAGGGG	59.887	19	AACTGGATGTACCACCACGG	60.69	20	208	31	238	AGAGCATGGAGAGAGAGGGG	60.891	20	TTTTGCGGAGAACAAGAAGAA	59.982	21	178	30	207
F01_transcript_14179	2	p3	(CAA)8	24	985	1008	GTGAGCTGGGAAAGCAGAAG	60.134	20	GCAACCTCGTTTGGTTCAAT	59.978	20	276	864	1139	GTGAGCTGGGAAAGCAGAAG	60.134	20	AATGCAACCTCGTTTGGTTC	59.978	20	279	864	1142	AGTGAGCTGGGAAAGCAGAA	60.134	20	GCAACCTCGTTTGGTTCAAT	59.978	20	277	863	1139
F01_transcript_14181	1	p1	(T)14	14	1357	1370	TTGTTGGCTCTCAGCTTGAA	59.716	20	TACAGCAGGATTGGAAACCC	59.933	20	184	1238	1421	TTGTTGGCTCTCAGCTTGAA	59.716	20	GGAAACCCCAATCGCTTTAT	60.15	20	172	1238	1409	TTGTTGGCTCTCAGCTTGAA	59.716	20	TCCCAACCACAAATCCTTTC	59.767	20	245	1238	1482
F01_transcript_14195	1	p1	(T)17	17	1599	1615	AGGGTGGTTGATGATGGTGT	60.096	20	TAATGAACAAGCCAGGGGAG	60.066	20	187	1460	1646	TGGTAGCTCAGATGGGAAGG	60.21	20	TAATGAACAAGCCAGGGGAG	60.066	20	261	1386	1646	TGGGGAAGATGGTAGCTCAG	60.21	20	TAATGAACAAGCCAGGGGAG	60.066	20	270	1377	1646
F01_transcript_14201	1	p3	(GGA)5	15	20	34	--
F01_transcript_14205	1	p2	(AG)15	30	44	73	TTGGAAAAAGAAAAAGGAGAGAAA	59.771	24	CCAGATCCCTCTCCTAACCC	59.89	20	242	4	245	TTGGAAAAAGAAAAAGGAGAGAA	58.597	23	CCAGATCCCTCTCCTAACCC	59.89	20	242	4	245	TGGAAAAAGAAAAAGGAGAGAAA	58.597	23	CCAGATCCCTCTCCTAACCC	59.89	20	241	5	245
F01_transcript_14205	2	p2	(GA)7	14	177	190	TTGGAAAAAGAAAAAGGAGAGAAA	59.771	24	CCAGATCCCTCTCCTAACCC	59.89	20	242	4	245	TTGGAAAAAGAAAAAGGAGAGAA	58.597	23	CCAGATCCCTCTCCTAACCC	59.89	20	242	4	245	TGGAAAAAGAAAAAGGAGAGAAA	58.597	23	CCAGATCCCTCTCCTAACCC	59.89	20	241	5	245
F01_transcript_14209	1	p3	(TGC)5	15	535	549	ATGACCGACTGAAACCCATC	59.786	20	AAGGACAACCGGTCTGAATG	59.966	20	254	493	746	ATGACCGACTGAAACCCATC	59.786	20	GAAAGGACAACCGGTCTGAA	60.088	20	256	493	748	ATGACCGACTGAAACCCATC	59.786	20	TCCATTCGCACCACTGTAAA	60.111	20	106	493	598
F01_transcript_14215	1	p1	(T)10	10	1821	1830	--
F01_transcript_14248	1	p2	(TA)7	14	26	39	--
F01_transcript_14248	2	p2	(TA)31	62	1588	1649	GAGACGCAGAGGGAAATCAC	59.81	20	CAAACGACCCAAGAAACAAAA	59.997	21	185	1508	1692	GAGACGCAGAGGGAAATCAC	59.81	20	CGACCCAAGAAACAAAAATGA	59.961	21	181	1508	1688	TGCTTGGAAGAAGCTTGTGA	59.716	20	CAAACGACCCAAGAAACAAAA	59.997	21	162	1531	1692
F01_transcript_14256	1	p2	(AT)23	46	1514	1559	TGGTGTCGGAGTATCAGCAG	59.855	20	TCAATATTTTCCCAACCCCA	59.988	20	203	1388	1590	ATCAAGAGGCTGTGGCTGAT	59.834	20	TCAATATTTTCCCAACCCCA	59.988	20	182	1409	1590	AAGAGGCTGTGGCTGATGAT	59.834	20	TCAATATTTTCCCAACCCCA	59.988	20	179	1412	1590
F01_transcript_14260	1	p3	(GCT)5	15	1745	1759	GTGTCCCTGTCCTGTCCTGT	60.006	20	TCACAAGCTCTTTTATTCACGA	57.719	22	185	1620	1804	GGGCAATCCAGTACCAAGAA	59.933	20	TCACAAGCTCTTTTATTCACGA	57.719	22	265	1540	1804	AGTGTCCCTGTCCTGTCCTG	60.153	20	TCACAAGCTCTTTTATTCACGA	57.719	22	186	1619	1804
F01_transcript_14263	1	p3	(TGT)5	15	1668	1682	GCAGGTCAAACTCAACAGCA	60.032	20	TGCTAAACCCATCAGAAAAGC	59.352	21	225	1544	1768	TGCAGGTCAAACTCAACAGC	60.032	20	TGCTAAACCCATCAGAAAAGC	59.352	21	226	1543	1768	ACAGCAACAACAGCAAGTGG	59.946	20	TGCTAAACCCATCAGAAAAGC	59.352	21	211	1558	1768
F01_transcript_14266	1	p3	(ATA)5	15	544	558	AAACCACCACCATCACCACT	60.135	20	TCTGCCAATCTCTCTCCTCC	59.486	20	230	364	593	GAAAACGACGACGTTCCTGT	60.156	20	TCTGCCAATCTCTCTCCTCC	59.486	20	124	470	593	CGATTCTTCGGCAAGAAAAC	59.823	20	TCTGCCAATCTCTCTCCTCC	59.486	20	246	348	593
F01_transcript_14266	2	p3	(GAT)5	15	966	980	ACCCCCTCGATGATAAGGAC	60.154	20	GACCAAATCCCATGCTGTCT	59.934	20	276	771	1046	ACCCCCTCGATGATAAGGAC	60.154	20	AAATCCCATGCTGTCTGGTC	59.934	20	272	771	1042	GGGAGCTCGAGCAATCTCTA	59.676	20	CGTGCTTTAACTCCTGCCTC	60.015	20	216	894	1109
F01_transcript_14266	3	p3	(TAG)6	18	1565	1582	CAAACGCAAGAGGTGAAACA	59.881	20	AGTCGGTTACTTTCGAGGCA	59.875	20	244	1378	1621	CAAACGCAAGAGGTGAAACA	59.881	20	GTCGGTTACTTTCGAGGCAG	59.875	20	243	1378	1620	CAAACGCAAGAGGTGAAACA	59.881	20	AATCTGCGTTTTGAAGTCGG	60.249	20	258	1378	1635
F01_transcript_14267	1	c	(GCCT)5tgtgatttaggaaagaaatttaaaatgtcattatttacctctattcagat(GGA)5	85	1676	1760	ATAACGTGTCACCAGCAGCA	60.333	20	TTTGTCTTGCATTACCAAAGAA	57.515	22	272	1529	1800	ATAACGTGTCACCAGCAGCA	60.333	20	TTTGTCTTGCATTACCAAAGAAT	57.886	23	272	1529	1800	ATAACGTGTCACCAGCAGCA	60.333	20	ATTTGTCTTGCATTACCAAAGAA	57.886	23	273	1529	1801
F01_transcript_14268	1	p2	(CT)6	12	9	20	--
F01_transcript_14273	1	p3	(CTC)7	21	88	108	TCCCGCATCAAAACTCCTAC	60.074	20	GAATTTGAATACCGGCGAGA	60.038	20	110	36	145	TCCCGCATCAAAACTCCTAC	60.074	20	ACCCCCACATGTTGTCTGTT	60.135	20	233	36	268	TCCCGCATCAAAACTCCTAC	60.074	20	AACCCCCACATGTTGTCTGT	60.135	20	234	36	269
F01_transcript_14280	1	p3	(GAT)5	15	946	960	ATGGCTTGTTGGGAGCTAGA	59.836	20	GTCGGAACAAGAGGACCAAA	60.088	20	176	864	1039	ATGGCTTGTTGGGAGCTAGA	59.836	20	GAGGACCAAATCCCATGTTG	60.173	20	166	864	1029	ATGGCTTGTTGGGAGCTAGA	59.836	20	TCAGTCGGAACAAGAGGACC	60.238	20	179	864	1042
F01_transcript_14288	1	p4	(TGTA)6	24	1630	1653	CATTTGTCCAAAAATGGCCT	59.801	20	ATCACCCCTGATGAGGTCAA	60.326	20	204	1602	1805	GGGGTGAAGGTAGCTGAATG	59.55	20	ATCACCCCTGATGAGGTCAA	60.326	20	225	1581	1805	GGGGTGAAGGTAGCTGAATG	59.55	20	TCACCCCTGATGAGGTCAAT	60.326	20	224	1581	1804
F01_transcript_14304	1	p2	(CT)7	14	33	46	TCCGTTCTAGAGAGAGAAAACGA	59.661	23	TATCCCTGGATTACGAAGCG	60.053	20	274	1	274	TCCGTTCTAGAGAGAGAAAACGA	59.661	23	CGATACCAGTGGGCTTTTTG	60.493	20	209	1	209	CCGTTCTAGAGAGAGAAAACGAA	59.205	23	TATCCCTGGATTACGAAGCG	60.053	20	273	2	274
F01_transcript_14308	1	p3	(AGC)10	30	518	547	ATGGAGGGTCATCAGGGAG	59.862	19	CCAGTTTCAACAAGCCCATT	59.971	20	223	494	716	ATGGAGGGTCATCAGGGAG	59.862	19	CAACAGCAGACCCAGTTTCA	59.873	20	234	494	727	ATGGAGGGTCATCAGGGAG	59.862	19	CAGCAGACCCAGTTTCAACA	59.873	20	231	494	724
F01_transcript_14320	1	p1	(A)10	10	51	60	TTTCCTCCCCATTTAAGCAA	59.52	20	CTGTTTGGGTTCACCGTTCT	60.005	20	187	19	205	TTCCTCCCCATTTAAGCAAA	59.52	20	CTGTTTGGGTTCACCGTTCT	60.005	20	186	20	205	TCCTCCCCATTTAAGCAAAA	59.52	20	CTGTTTGGGTTCACCGTTCT	60.005	20	185	21	205
F01_transcript_14321	1	p3	(GCA)5	15	139	153	CCTCACTCCTTGCTCGAAAC	59.989	20	TTGGGATTGGCTCTATCTGG	60.029	20	222	50	271	CTCACTCCTTGCTCGAAACC	59.989	20	TTGGGATTGGCTCTATCTGG	60.029	20	221	51	271	CTCACTCCTTGCTCGAAACC	59.989	20	GATCAAAACCAGGAGGCAGA	60.195	20	248	51	298
F01_transcript_14324	1	p3	(GGT)6	18	479	496	GTCCTTCTTTGGTGGTGGAA	59.943	20	CCCGTACCATTGCACTTCTT	59.993	20	189	447	635	GTCCTTCTTTGGTGGTGGAA	59.943	20	GGCAACCAGGACACTTCATT	59.973	20	227	447	673	TTCCAGTCCTTCTTTGGTGG	60.081	20	CCCGTACCATTGCACTTCTT	59.993	20	194	442	635
F01_transcript_14324	2	p1	(T)10	10	1700	1709	CAAATCCATGCTTGTTGGAA	59.518	20	TCGATTGCTTGTTGAACTCTG	59.061	21	133	1676	1808	CAAATCCATGCTTGTTGGAA	59.518	20	TCGATTGCTTGTTGAACTCTGT	59.92	22	133	1676	1808	AGCAAATCCATGCTTGTTGG	61.032	20	TCGATTGCTTGTTGAACTCTG	59.061	21	135	1674	1808
F01_transcript_14326	1	p3	(AGA)7	21	1142	1162	TGGTGGTGATGCTCAACAAT	59.967	20	CACCACCTTCAACCACCTCT	60.002	20	239	955	1193	GTTTGCATTCGCCAGAAAAT	60.081	20	CACCACCTTCAACCACCTCT	60.002	20	162	1032	1193	GTTTGCATTCGCCAGAAAAT	60.081	20	ATCATGTGCACCACCTTCAA	59.967	20	170	1032	1201
F01_transcript_14329	1	p2	(AG)8	16	68	83	--
F01_transcript_14342	1	p3	(AAC)5	15	397	411	GATTAGGATTTGGGGGCAAT	59.984	20	CAGCCCATCCTTGACAAAAT	59.933	20	171	270	440	AAGAGATGTGGGATGCTTGG	60.073	20	AGCATATTTGCCCGTATTGC	59.956	20	174	297	470	AAGAGATGTGGGATGCTTGG	60.073	20	CAGCCCATCCTTGACAAAAT	59.933	20	144	297	440
F01_transcript_14343	1	p3	(GTA)5	15	1611	1625	GAAGAAAGAGGGGGTTCCAG	60.045	20	AGGGAGGCCAGAATCGTAAT	59.925	20	262	1415	1676	AGAAGAAAGAGGGGGTTCCA	60.045	20	AGGGAGGCCAGAATCGTAAT	59.925	20	263	1414	1676	GAAAGAGGGGGTTCCAGAAG	60.045	20	AGGGAGGCCAGAATCGTAAT	59.925	20	259	1418	1676
F01_transcript_14347	1	p2	(TA)6	12	7	18	--
F01_transcript_14349	1	p3	(ATT)5	15	181	195	TTATGGGCTACTGCCTGAGC	60.374	20	CCAACAAATAACCCACTGCC	60.227	20	217	79	295	TTATGGGCTACTGCCTGAGC	60.374	20	CCCAACAAATAACCCACTGC	60.227	20	218	79	296	TTATGGGCTACTGCCTGAGC	60.374	20	TAACCCACTGCCTTTGCTTT	59.747	20	209	79	287
F01_transcript_14349	2	p1	(T)10	10	721	730	TTGGCTTGCTGCAACATTT	60.395	19	GCTCGACTCATTTAGGCTCG	60.118	20	240	611	850	TTTGGCTTGCTGCAACATT	60.395	19	GCTCGACTCATTTAGGCTCG	60.118	20	241	610	850	TTTGGCTTGCTGCAACATTT	61.691	20	GCTCGACTCATTTAGGCTCG	60.118	20	241	610	850
F01_transcript_14357	1	c	(CA)18(TA)22	80	53	132	TCCAAAACAGAGATTTCAACCA	59.587	22	TGATGTGGGAAGCAAAGAAA	59.247	20	199	7	205	TCCAAAACAGAGATTTCAACCA	59.587	22	ACTTGCAAAAAGGGGATCG	60.059	19	178	7	184	TCCAAAACAGAGATTTCAACCA	59.587	22	GTGATGTGGGAAGCAAAGAAA	60.103	21	200	7	206
F01_transcript_14357	2	p1	(T)11	11	301	311	ATATCCGATCCCCTTTTTGC	60.116	20	AACAATCCAAGGAAAACGAAAA	59.858	22	199	161	359	ATATCCGATCCCCTTTTTGC	60.116	20	CAATCCAAGGAAAACGAAAA	57.728	20	197	161	357	TGCTTCCCACATCACTATGTTC	60	22	TGGAGGGTAAAGGAAACGAA	59.541	20	278	192	469
F01_transcript_14358	1	p1	(T)10	10	357	366	TCCTTGCGAACTCATTTTCA	59.395	20	TGGAGCCAAATGCCTACTTC	60.214	20	238	201	438	TCCTTGCGAACTCATTTTCA	59.395	20	TTGGAGCCAAATGCCTACTT	59.708	20	239	201	439	TCCTTGCGAACTCATTTTCA	59.395	20	AAATTGGAGCCAAATGCCTA	59.547	20	242	201	442
F01_transcript_14358	2	p1	(C)11	11	1795	1805	--
F01_transcript_14359	1	p3	(GGA)6	18	994	1011	CTTATGGTGGCCCTACTGGA	59.948	20	GGTCTTGCAGGAGCAGTTTC	59.997	20	262	868	1129	CTTATGGTGGCCCTACTGGA	59.948	20	ATCATAACCGGGTCTTGCAG	59.955	20	272	868	1139	GGTGGCCCTACTGGATACAA	59.813	20	GGTCTTGCAGGAGCAGTTTC	59.997	20	257	873	1129
F01_transcript_14368	1	p3	(TGA)5	15	1510	1524	AAGCTAGCCCTTCTCCCAAG	59.976	20	TAAGGTGACTCGCTGCCTCT	60.156	20	262	1301	1562	AAGCTAGCCCTTCTCCCAAG	59.976	20	CTAAGGTGACTCGCTGCCTC	60.156	20	263	1301	1563	TTCAGAAGCTAATGGTGGGG	60.066	20	TAAGGTGACTCGCTGCCTCT	60.156	20	123	1440	1562
F01_transcript_14393	1	p2	(TC)8	16	25	40	--
F01_transcript_14406	1	p2	(AG)7	14	179	192	TTTTCCCATTGACCTTCTGC	60.051	20	GGCTGAGGCACCAAATACAT	59.962	20	133	118	250	TTTTCCCATTGACCTTCTGC	60.051	20	CTCCCCCGAAGAAGAAAAAC	60.046	20	223	118	340	TTTTCCCATTGACCTTCTGC	60.051	20	AAATTGATCTCACATCCGGC	59.9	20	255	118	372
F01_transcript_14414	1	p1	(T)14	14	1660	1673	GTGGCTGAATTGGCACATTA	59.548	20	TCCAGAATCTTCAAGGTCGC	60.34	20	258	1519	1776	CTTTTTGGTGGCTGAATTGG	60.472	20	TCCAGAATCTTCAAGGTCGC	60.34	20	265	1512	1776	TGGATATCTTTTTGGTGGCTG	59.946	21	TCCAGAATCTTCAAGGTCGC	60.34	20	272	1505	1776
F01_transcript_14420	1	p3	(CTC)11	33	1390	1422	AGATGGGTCCTCACTGGATG	59.92	20	TCCACACTGGAACATGGAAA	59.935	20	178	1322	1499	TGGCAGGAGGTCTGAAAAGT	59.844	20	TCCACACTGGAACATGGAAA	59.935	20	257	1243	1499	ATTTGGCAGGAGGTCTGAAA	59.67	20	TCCACACTGGAACATGGAAA	59.935	20	260	1240	1499
F01_transcript_14425	1	p3	(TCT)5	15	264	278	ATATACCATCCTCCTCCGCC	60.138	20	TACAACACCCCAAAACCCTC	59.688	20	255	224	478	ATATACCATCCTCCTCCGCC	60.138	20	AGATAAGAGTCCCGATGGGC	60.431	20	134	224	357	TAGAAGAAGGCAGGGGATCA	59.767	20	AGATAAGAGTCCCGATGGGC	60.431	20	180	178	357
F01_transcript_14426	1	p2	(AG)6	12	147	158	TGGCCTAATTTGGTGAGGAG	60.066	20	GCTGCTGTTGTGGAGTCAAA	60.032	20	125	115	239	TGGCCTAATTTGGTGAGGAG	60.066	20	CCACTGTTGCTGTTGTTGCT	59.946	20	142	115	256	TGGCCTAATTTGGTGAGGAG	60.066	20	GCTGTTGTTGCTGCTGTTGT	60.104	20	134	115	248
F01_transcript_14426	2	p3	(GCG)6	18	315	332	TTTGACTCCACAACAGCAGC	60.032	20	CCGATCCAGATCGTTTTGTT	59.933	20	276	220	495	AGCAACAACAGCAACAGTGG	59.946	20	CCGATCCAGATCGTTTTGTT	59.933	20	259	237	495	GCAGCAACAACAGCAACAGT	60.104	20	CCGATCCAGATCGTTTTGTT	59.933	20	261	235	495
F01_transcript_14433	1	p3	(GGC)5	15	430	444	AGGAAACTGGGTCGTTGTTG	60.005	20	TTAATCTCGCCATCCGAATC	60.001	20	145	370	514	GGGCCAATCAAGAAGATGAA	60.014	20	TTAATCTCGCCATCCGAATC	60.001	20	269	246	514	CAAACAAAAGTCCCCGAAAA	59.947	20	TTAATCTCGCCATCCGAATC	60.001	20	204	311	514
F01_transcript_14442	1	p3	(TTC)5	15	1906	1920	--
F01_transcript_14450	1	p2	(TC)16	32	191	222	AGCGCTTTTTCCTTGATCTG	59.592	20	TTCAAACTTCAGGCATCAGC	59.002	20	280	97	376	AGCGCTTTTTCCTTGATCTG	59.592	20	CAAACTTCAGGCATCAGCTTC	60.008	21	278	97	374	AGCGCTTTTTCCTTGATCTG	59.592	20	AAACTTCAGGCATCAGCTTCA	60.008	21	277	97	373
F01_transcript_14452	1	p2	(GA)9	18	28	45	GACGGCTGCTGCATAGTAAA	59.09	20	CTCCCTCTTAATGTCCTGCG	59.83	20	219	0	218	GACGGCTGCTGCATAGTAAA	59.09	20	AGTGGCGAACTGACCAGAAT	59.727	20	129	0	128	GACGGCTGCTGCATAGTAAA	59.09	20	TGGACTTCTGGAGATCCTGC	60.349	20	278	0	277
F01_transcript_14465	1	p1	(T)10	10	516	525	TGCTTTGCTGTGAGATTTGG	59.988	20	TTTTGGCCCCAGTATTCAAC	59.801	20	145	470	614	TTTGAGAAAGTTGGGCATCC	60.051	20	TTTTGGCCCCAGTATTCAAC	59.801	20	202	413	614	GGGTTTTGACTGGTTTGCAT	59.836	20	TTTTGGCCCCAGTATTCAAC	59.801	20	236	379	614
F01_transcript_14466	1	p2	(TA)26	52	1641	1692	GAAATGCAAAGAGGTTCCCA	60.051	20	CCATCTAAAGCTATCACAGTTCTTCA	60.194	26	228	1497	1724	TGAAATGCAAAGAGGTTCCC	60.051	20	CCATCTAAAGCTATCACAGTTCTTCA	60.194	26	229	1496	1724	ATGCAAAGAGGTTCCCACAA	60.495	20	CCATCTAAAGCTATCACAGTTCTTCA	60.194	26	225	1500	1724
F01_transcript_14468	1	p1	(A)10	10	186	195	TTAGCTGTTTGGCTTTGGCT	60.018	20	CTGTTTGGGTTCACCGTTCT	60.005	20	268	73	340	TTAGCTGTTTGGCTTTGGCT	60.018	20	GCCTCCAATGGTCGTAGAAA	60.074	20	247	73	319	TTAGCTGTTTGGCTTTGGCT	60.018	20	GTCTGTTTGGGTTCACCGTT	59.867	20	270	73	342
F01_transcript_14474	1	p2	(TC)7	14	53	66	AGGATTTCAATTTTGAGGCG	59.158	20	AGGCAGTAGAGTTCCCAGCA	60.012	20	187	8	194	AGGATTTCAATTTTGAGGCG	59.158	20	GGCAGTAGAGTTCCCAGCAG	60.012	20	186	8	193	AGGATTTCAATTTTGAGGCG	59.158	20	CAGTAGAGTTCCCAGCAGGC	60.012	20	184	8	191
F01_transcript_14475	1	p1	(T)11	11	1720	1730	TCAAGAGTACGTGGATTGCG	59.864	20	ACGTCCAAATTCAAATCGAG	57.67	20	245	1554	1798	GAATCAAAGGCACAGGGAAG	59.67	20	ACGTCCAAATTCAAATCGAG	57.67	20	222	1577	1798	AAGAGTACGTGGATTGCGGT	59.621	20	ACGTCCAAATTCAAATCGAG	57.67	20	243	1556	1798
F01_transcript_14487	1	p3	(GTA)5	15	1567	1581	GAAGAAAGAGGGGGTTCCAG	60.045	20	AGGGAGGCCAGAATCGTAAT	59.925	20	262	1371	1632	AGAAGAAAGAGGGGGTTCCA	60.045	20	AGGGAGGCCAGAATCGTAAT	59.925	20	263	1370	1632	GAAAGAGGGGGTTCCAGAAG	60.045	20	AGGGAGGCCAGAATCGTAAT	59.925	20	259	1374	1632
F01_transcript_14506	1	p5	(CTAGC)5	25	1502	1526	GTAAATGGAGCGGAGGATCA	60.036	20	ATTTGAAAAATGCCTGCGTC	60.081	20	248	1470	1717	GTAAATGGAGCGGAGGATCA	60.036	20	GATTTGAAAAATGCCTGCGT	60.081	20	249	1470	1718	TCAAGGGCCTGTAAATGGAG	60.066	20	ATTTGAAAAATGCCTGCGTC	60.081	20	258	1460	1717
F01_transcript_14513	1	p2	(TA)19	38	1587	1624	CCAACAAGAGGGAATCCAAA	59.903	20	TCCCTTGATTCCTTCAAAAA	57.252	20	255	1496	1750	GGAACATCCAACAAGAGGGA	59.903	20	TCCCTTGATTCCTTCAAAAA	57.252	20	262	1489	1750	TGGGCCTAACGTTTGCTAAG	60.257	20	TCCCTTGATTCCTTCAAAAA	57.252	20	201	1550	1750
F01_transcript_14524	1	p2	(TC)19	38	14	51	--
F01_transcript_14538	1	p2	(TC)8	16	102	117	TAAACCCTTTCTCCGTTCCC	60.291	20	GCCATTGCTGTATATGCCCT	59.951	20	126	27	152	CCCAAAACCCAAATCACACT	59.688	20	GCCATTGCTGTATATGCCCT	59.951	20	109	44	152	TAAACCCTTTCTCCGTTCCC	60.291	20	CGTCGCCATTGCTGTATATG	60.118	20	130	27	156
F01_transcript_14544	1	p1	(T)11	11	1702	1712	--
F01_transcript_14556	1	p2	(AT)15	30	1744	1773	TCAGGTAGGTGAATCGAGGG	60.065	20	AAAACCAAAACAAACAGGGTC	57.996	21	130	1673	1802	CAGGTAGGTGAATCGAGGGA	60.065	20	AAAACCAAAACAAACAGGGTC	57.996	21	129	1674	1802	TCAGGTAGGTGAATCGAGGG	60.065	20	AAACCAAAACAAACAGGGTCTT	58.957	22	129	1673	1801
F01_transcript_14558	1	p3	(CAA)5	15	168	182	AGAATCAATGGCGAGTGGTC	60.081	20	GCCAATCACTCCTTCCTTCA	60.195	20	239	124	362	AGAATCAATGGCGAGTGGTC	60.081	20	TCAGGAATTGCAGACAATGG	59.648	20	261	124	384	ACTTCTTTTCAGCTGCCCAA	59.993	20	GCCAAGAATGTACCATCCCA	60.723	20	181	70	250
F01_transcript_14560	1	p2	(AT)24	48	238	285	TTCCCTTGCCTCTACTGCAT	59.836	20	TGGTGAAGAATTCGACATGG	59.496	20	239	101	339	TGCATACATGCGAATAAGCC	59.691	20	TGGTGAAGAATTCGACATGG	59.496	20	224	116	339	TCTTCCCTTGCCTCTACTGC	59.574	20	TGGTGAAGAATTCGACATGG	59.496	20	241	99	339
F01_transcript_14563	1	p2	(AG)8	16	223	238	TCCCACAGGAAGGATTTTGT	59.381	20	GAGTTTTGCCAAGGCCATTA	60.074	20	243	162	404	TCCCACAGGAAGGATTTTGT	59.381	20	GGCCATTAGCAAGCAGAGAG	60.118	20	231	162	392	TCCCACAGGAAGGATTTTGT	59.381	20	AGGCCATTAGCAAGCAGAGA	60.118	20	232	162	393
F01_transcript_14574	1	p2	(AG)8	16	44	59	CACCCGTATATTCCCAGTCC	59.126	20	TATCGGAGTCCATCTCCGTC	60.034	20	190	10	199	CCACTCACCCGTATATTCCC	59.126	20	TATCGGAGTCCATCTCCGTC	60.034	20	195	5	199	CCACTCACCCGTATATTCCC	59.126	20	AGGGTTATGATTGTCTGGCG	59.955	20	152	5	156
F01_transcript_14575	1	p1	(A)10	10	214	223	TCATCCAACTCATTCCACCA	59.893	20	CGGCCCTTGATGTCTAGAAG	59.83	20	253	47	299	TCATCCAACTCATTCCACCA	59.893	20	TGTCTAGAAGGAAGAGCGCC	59.717	20	243	47	289	ATCGGCAGATCTCGTCAGTC	60.381	20	CGGCCCTTGATGTCTAGAAG	59.83	20	133	167	299
F01_transcript_14598	1	p2	(CT)6	12	417	428	ATCAGATCTATGGCTTGGCG	60.199	20	GATATTCGTGTTGGATGGGG	60.014	20	235	342	576	ATCAGATCTATGGCTTGGCG	60.199	20	GGATATTCGTGTTGGATGGG	60.014	20	236	342	577	ATCAGATCTATGGCTTGGCG	60.199	20	GGGATATTCGTGTTGGATGG	60.014	20	237	342	578
F01_transcript_14603	1	p3	(CTT)5	15	1242	1256	TCTGACCGGAAACATAAGGC	60.074	20	TAAAGTGCCGGTCATCATCA	60.073	20	256	1156	1411	ACATAAGGCGAGCGTGTTCT	59.904	20	TAAAGTGCCGGTCATCATCA	60.073	20	245	1167	1411	GTTCTCTCGCATCAGCTTCC	60.104	20	TAAAGTGCCGGTCATCATCA	60.073	20	230	1182	1411
F01_transcript_14603	2	c	(TC)6ccctgtagaagaagtatatggaatatatgatgatgctcaatttggagaggaatct(AG)10atgactttttgtaacgaataaacaaaattatgtaacatgaggagtgttttt(TTA)6	156	1608	1763	--
F01_transcript_14611	1	p3	(GGA)6	18	934	951	CTTATGGTGGCCCTACTGGA	59.948	20	GGTCTTGCAGGAGCAGTTTC	59.997	20	262	808	1069	CTTATGGTGGCCCTACTGGA	59.948	20	ATCATAACCGGGTCTTGCAG	59.955	20	272	808	1079	GGTGGCCCTACTGGATACAA	59.813	20	GGTCTTGCAGGAGCAGTTTC	59.997	20	257	813	1069
F01_transcript_14625	1	p2	(TA)6	12	1631	1642	TGGGAGTGAAGGTCATGTTG	59.52	20	GCATAGCTTCCAAACCCTCA	60.214	20	229	1440	1668	TTGGTTCCAACTGCCTGAAT	60.495	20	GCATAGCTTCCAAACCCTCA	60.214	20	158	1511	1668	ATTGGTTCCAACTGCCTGAA	60.495	20	GCATAGCTTCCAAACCCTCA	60.214	20	159	1510	1668
F01_transcript_14633	1	p3	(CAA)5	15	233	247	CATTCCACAAGCCTGTTCTG	59.288	20	AAAATATGCTGCTGGCCTTG	60.23	20	229	44	272	CATTCCACAAGCCTGTTCTG	59.288	20	AATATGCTGCTGGCCTTGAT	59.696	20	227	44	270	GCTCCATCTTCATTCTCTCCC	60.169	21	AATATGGGTGCTCCTTGGTG	59.813	20	278	183	460
F01_transcript_14640	1	p1	(T)11	11	266	276	TTCCTTTGTTCCGACTCGAT	59.67	20	TCCAGCTCCTGCTCTTCAAT	60.096	20	271	98	368	TTCCTTTGTTCCGACTCGAT	59.67	20	AATGAATCGGCCATTTTCAG	59.901	20	202	98	299	TTCCTTTGTTCCGACTCGAT	59.67	20	TCAAATGAATCGGCCATTTT	60.268	20	205	98	302
F01_transcript_14645	1	p3	(GGA)5	15	232	246	AGGGCCGAACCCAATAATAC	60.041	20	CGATCCTGCTCTTTGAATCC	59.773	20	265	40	304	AGGGCCGAACCCAATAATAC	60.041	20	ATCGTCGATCCTGCTCTTTG	60.362	20	270	40	309	AAGGGCCGAACCCAATAATA	60.508	20	CGATCCTGCTCTTTGAATCC	59.773	20	266	39	304
F01_transcript_14646	1	p2	(AT)10	20	1657	1676	ACTGGAACGAGTGCGGATAC	60.142	20	GAGAGATCCCACTTGCTTTCTT	58.991	22	117	1612	1728	CATTGTGACCGACTGACTGG	60.154	20	GAGAGATCCCACTTGCTTTCTT	58.991	22	132	1597	1728	CCATTGTGACCGACTGACTG	60.154	20	GAGAGATCCCACTTGCTTTCTT	58.991	22	133	1596	1728
F01_transcript_14659	1	p1	(T)11	11	13	23	--
F01_transcript_14659	2	p3	(TTA)6	18	1298	1315	TCATATTCCGGATTGGATGG	60.489	20	AAACCGATATGCCACTTTGC	59.967	20	259	1137	1395	TGGTTCATATTCCGGATTGG	60.523	20	AAACCGATATGCCACTTTGC	59.967	20	263	1133	1395	TCATATTCCGGATTGGATGG	60.489	20	CCACTTTGCTGGCTGATACA	59.864	20	248	1137	1384
F01_transcript_14660	1	p3	(AAT)7	21	112	132	TCATTACAGCCACCACTTGC	59.722	20	GACCTCCCCTCGAAAAACTC	60.052	20	269	63	331	TCATTACAGCCACCACTTGC	59.722	20	TGGGGATTCTTTGGTAGCAG	60.066	20	120	63	182	TCATTACAGCCACCACTTGC	59.722	20	TGAATGGAGGGTTTTTCCAG	59.903	20	167	63	229
F01_transcript_14664	1	p3	(TCT)5	15	111	125	GAGTTCCCGAGGAGGAGAAT	59.636	20	GGGAAGGAGAAGGGAGATTG	60.008	20	164	50	213	AGGAGAATTGGCGGGATTAG	60.411	20	GGGAAGGAGAAGGGAGATTG	60.008	20	152	62	213	GAGTTCCCGAGGAGGAGAAT	59.636	20	TTGTCGGCAATCTGACCATA	60.073	20	147	50	196
F01_transcript_14665	1	c	(CCATCC)6ttgtcctttttcgtgttttctgtttgattttgttattcatttcctttctatat(GTA)5	104	1523	1626	TTTGAGCTTATGGCTTTTGATG	59.385	22	GTCTCGAGGCCAGAATCGTA	60.362	20	189	1485	1673	TTTGAGCTTATGGCTTTTGATG	59.385	22	CTCGAGGCCAGAATCGTACT	59.454	20	187	1485	1671	TTTGAGCTTATGGCTTTTGATG	59.385	22	TAGGTCTCGAGGCCAGAATC	59.386	20	192	1485	1676
F01_transcript_14667	1	p2	(TC)7	14	99	112	TCAAATTCCCAATCCAAAATG	59.624	21	GGGTCAAAGCTTCAACCAGA	60.232	20	271	24	294	TCAAATTCCCAATCCAAAATG	59.624	21	CTTCAGCCACATCCACAAAA	59.691	20	211	24	234	TCTCAAATTCCCAATCCAAAA	59.374	21	GGGTCAAAGCTTCAACCAGA	60.232	20	273	22	294
F01_transcript_14674	1	p5	(GAAGA)7	35	2	36	--
F01_transcript_14674	2	p3	(TTG)7	21	1665	1685	CATTGCGTTGCATTCAATTT	59.567	20	ATTCCAGCCTCCACAGAATG	60.073	20	222	1527	1748	ACGCGTGGTCATTTTTGACT	60.559	20	ATTCCAGCCTCCACAGAATG	60.073	20	194	1555	1748	TGAATCTCAGCGGGTTTTGT	60.636	20	ATTCCAGCCTCCACAGAATG	60.073	20	174	1575	1748
F01_transcript_14676	1	p3	(AGC)8	24	221	244	CTTCCCCAAAACCCTCTTTC	59.912	20	TGGAAATAACACGAATGGCA	59.93	20	181	106	286	CTTCCCCAAAACCCTCTTTC	59.912	20	TAACACGAATGGCATTGGAA	59.93	20	175	106	280	CCATTTTCACGATTCGGATT	59.762	20	TGGAAATAACACGAATGGCA	59.93	20	204	83	286
F01_transcript_14696	1	p2	(CT)10	20	52	71	CAAACTTTCTCTCTCTTACAGGCTT	58.888	25	TTCTGGTCTCAACCAAACCC	59.943	20	157	15	171	CAAACTTTCTCTCTCTTACAGGCTT	58.888	25	TGGTCTCAACCAAACCCAAT	60.21	20	154	15	168	CAAACTTTCTCTCTCTTACAGGCT	57.656	24	TTCTGGTCTCAACCAAACCC	59.943	20	157	15	171
F01_transcript_14701	1	c	(TA)7t(TA)14	43	1636	1678	ACCTGTTCGTCACCCTCATC	59.969	20	GGCACGATACAACTTGCTGA	59.871	20	257	1483	1739	GGGACATAGGCTTCGTGAAA	60.074	20	GGCACGATACAACTTGCTGA	59.871	20	130	1610	1739	TCCTAGCTTCTCCAACCCAA	59.807	20	GGCACGATACAACTTGCTGA	59.871	20	280	1460	1739
F01_transcript_14718	1	p3	(AGA)7	21	105	125	CGGCACACATCATTCATCTC	60.08	20	ACGGATTGGGATAGGTAGGG	60.032	20	227	37	263	CGGCACACATCATTCATCTC	60.08	20	TATGCAGGATTGAATCGCAA	60.179	20	246	37	282	CGGCACACATCATTCATCTC	60.08	20	GCAACGGATTGGGATAGGTA	59.784	20	230	37	266
F01_transcript_14723	1	p3	(TGC)5	15	425	439	ATGACCGACTGAAACCCATC	59.786	20	AAGGACAACCGGTCTGAATG	59.966	20	264	383	646	ATGACCGACTGAAACCCATC	59.786	20	GAAAGGACAACCGGTCTGAA	60.088	20	266	383	648	ATGACCGACTGAAACCCATC	59.786	20	TCCATTCGCACCACTGTAAA	60.111	20	106	383	488
F01_transcript_14736	1	p2	(GA)7	14	76	89	GGGATTCGCAGTCCAAAATA	59.901	20	ATCCAACAAAACCCAGACCA	60.21	20	147	17	163	GGGATTCGCAGTCCAAAATA	59.901	20	CCCTTGAACACATTTGACCC	60.21	20	266	17	282	GGGATTCGCAGTCCAAAATA	59.901	20	CCTTGAACACATTTGACCCC	60.21	20	265	17	281
F01_transcript_14746	1	p3	(ATC)5	15	76	90	TTTCTGGGTTTGATTGAGCC	60.051	20	AGGGCAGAAAAACTCCGATT	60.074	20	172	30	201	TTTCTGGGTTTGATTGAGCC	60.051	20	GGCTGCCATTTGTTCTTGAT	60.081	20	104	30	133	GGGTTTGATTGAGCCAAAAA	59.916	20	AGGGCAGAAAAACTCCGATT	60.074	20	167	35	201
F01_transcript_14759	1	p2	(TA)25	50	811	860	AGCAGTGGCGTAGCCAAATA	60.792	20	TCGTATACCTGCAGTTAGATAAATCG	59.971	26	203	688	890	GCAGTGGCGTAGCCAAATA	59.848	19	TCGTATACCTGCAGTTAGATAAATCG	59.971	26	202	689	890	AGCAGTGGCGTAGCCAAATA	60.792	20	TTTTGTTGTAGATCGTATACCTGC	57.516	24	215	688	902
F01_transcript_14759	2	p2	(AT)18	36	1373	1408	GCTCGAGTGTCGGTCATGTA	59.862	20	TTGCCGTTCAAGTTCAATCA	60.234	20	151	1286	1436	GCTCGAGTGTCGGTCATGTA	59.862	20	AAAGGTAGACATGCAAGCCG	60.27	20	275	1286	1560	GCTCGAGTGTCGGTCATGTA	59.862	20	AGGTAGACATGCAAGCCGAT	59.723	20	273	1286	1558
F01_transcript_14760	1	p3	(GCA)5	15	338	352	GCAGTATCAGCAGCAATGGA	59.979	20	GAGCAAAGCAAGATTGGAGG	59.955	20	263	277	539	GCAGTATCAGCAGCAATGGA	59.979	20	GGAGCAAAGCAAGATTGGAG	59.955	20	264	277	540	GCGATTTGACTCAACAGCAA	59.995	20	ATCCAGGTCTGCAAATCACC	59.934	20	274	234	507
F01_transcript_14771	1	p2	(AT)16	32	241	272	CCAATTAATCAATCCCTCCG	59.227	20	TGAAGGGGTAGATTTGGCTG	60.066	20	176	195	370	TCAATCCCTCCGTCTTTCTC	59.213	20	TGAAGGGGTAGATTTGGCTG	60.066	20	168	203	370	CCAATTAATCAATCCCTCCG	59.227	20	GAACTCTGCCTACCACCAGG	59.721	20	222	195	416
F01_transcript_14772	1	p2	(AG)8	16	45	60	AAGACACCTTGACTTGAGCAAA	59.029	22	TTCCTTTCTCCCTTCTGCAA	59.926	20	224	19	242	AAGACACCTTGACTTGAGCAAA	59.029	22	CCTGAAAGGGAATGGACAAA	59.903	20	154	19	172	AAGACACCTTGACTTGAGCAAA	59.029	22	CTCCCTTCTGCAATATGCGT	60.235	20	217	19	235
F01_transcript_14772	2	p3	(TTA)7	21	1743	1763	--
F01_transcript_14791	1	p1	(A)14	14	19	32	--
F01_transcript_14791	2	p3	(GAA)5	15	198	212	AGAATACAAACGCCTGTCCG	60.132	20	ATTCATCCAAATACGCAGGC	59.929	20	172	69	240	TACAAACGCCTGTCCGTAGA	59.342	20	ATTCATCCAAATACGCAGGC	59.929	20	168	73	240	GAATACAAACGCCTGTCCGT	60	20	TGGCCATTCTGATGACAAGT	59.09	20	198	70	267
F01_transcript_14797	1	p2	(CT)15	30	20	49	--
F01_transcript_14801	1	p1	(T)14	14	1615	1628	TGCTTCTTGCACCACATCTC	59.992	20	AAACAACAATCCACCAACCC	59.55	20	275	1452	1726	GCTTCTTGCACCACATCTCA	59.992	20	AAACAACAATCCACCAACCC	59.55	20	274	1453	1726	TGCTTCTTGCACCACATCTC	59.992	20	AAAATGGCCTTGCCATCTAA	59.547	20	236	1452	1687
F01_transcript_14816	1	p3	(ATT)5	15	1769	1783	--
F01_transcript_14820	1	p2	(TC)9	18	1591	1608	GTGGTGCTTGGGGAAGTTTA	59.971	20	GCTGTTGTGAAAAGAGGGGA	60.232	20	233	1418	1650	TGGTGCTTGGGGAAGTTTAC	59.971	20	TGTTGTGAAAAGAGGGGAGC	60.232	20	230	1419	1648	GTGGTGCTTGGGGAAGTTTA	59.971	20	TGTTGTGAAAAGAGGGGAGC	60.232	20	231	1418	1648
F01_transcript_14822	1	p2	(AG)16	32	35	66	CATCGATAAGCAGGGAGGAA	60.17	20	AGAAAACATATTGCGTCGGG	59.96	20	241	3	243	CATCGATAAGCAGGGAGGAA	60.17	20	AAACATATTGCGTCGGGAAG	59.96	20	238	3	240	CATCGATAAGCAGGGAGGAA	60.17	20	CGTCGGGAAGGAGTTGAGTA	60.246	20	228	3	230
F01_transcript_14822	2	p4	(TTAT)5	20	1729	1748	--
F01_transcript_14828	1	p1	(T)10	10	20	29	--
F01_transcript_14832	1	p2	(GA)6	12	1524	1535	GGAGGCGACAGAGGAGAGTA	59.555	20	TTTGATGCAGCATTTGAACA	58.831	20	280	1399	1678	GGAGGCGACAGAGGAGAGTA	59.555	20	TGCAGCATTTGAACAATTGAA	60.244	21	275	1399	1673	TGCTGATGGAGTCTGCTGAA	60.711	20	TTTGATGCAGCATTTGAACA	58.831	20	213	1466	1678
F01_transcript_14836	1	p1	(T)11	11	1710	1720	CCTGATGGTCCTGATCCTTG	60.465	20	GAAAACAATACAAACACCCCAA	58.764	22	240	1545	1784	TGGTCCTGATCCTTGGACTT	59.505	20	GAAAACAATACAAACACCCCAA	58.764	22	235	1550	1784	TTGTAGGCTTGCCTTTGTCA	59.464	20	GAAAACAATACAAACACCCCAA	58.764	22	122	1663	1784
F01_transcript_14863	1	p2	(TA)8	16	245	260	TCTCTCTTCGCTTCTCTCGC	60.119	20	GAGGGTTCAGAGATCAACGG	59.655	20	267	86	352	TAATTATCTCGCCGGCTCAC	60.196	20	GAGGGTTCAGAGATCAACGG	59.655	20	175	178	352	TCACATGTCCCCTTCTACCC	59.779	20	GAGGGTTCAGAGATCAACGG	59.655	20	195	158	352
F01_transcript_14868	1	p1	(T)10	10	1690	1699	CAGAAGTAGCACGCCACAAG	59.658	20	GGAAACATTCTACACACTCGGA	59.101	22	172	1567	1738	CAGAAGTAGCACGCCACAAG	59.658	20	AGGAAACATTCTACACACTCGGA	60.047	23	173	1567	1739	TGCCACTTGTAGGAAAGCAA	59.464	20	GGAAACATTCTACACACTCGGA	59.101	22	240	1499	1738
F01_transcript_14874	1	p1	(T)11	11	1035	1045	CGCACAGCTCATGATTCACT	60.016	20	ATTGCCCAGCTTCAAAGAAA	59.823	20	252	818	1069	CGCACAGCTCATGATTCACT	60.016	20	CTAAAACTGGATTGCCCAGC	59.708	20	262	818	1079	CGCACAGCTCATGATTCACT	60.016	20	GATTGCCCAGCTTCAAAGAA	60.331	20	253	818	1070
F01_transcript_14874	2	p1	(T)10	10	1365	1374	TATTAGCCCCCAGGTAACCC	60.034	20	AAGCTGAGCATGAAGTGCCT	60.164	20	197	1330	1526	TATTAGCCCCCAGGTAACCC	60.034	20	CATGAAGTGCCTTCTGGACA	59.831	20	189	1330	1518	CCAGGTAACCCTTGCTTGAA	60.103	20	AAGCTGAGCATGAAGTGCCT	60.164	20	188	1339	1526
F01_transcript_14878	1	p1	(C)22	22	1640	1661	GGTTTGTTACTTGGCTGTGGA	60.023	21	TCCATTACAAGTGTTTGCCA	57.605	20	267	1532	1798	TCAAGGCTATGCCTTTGATG	58.869	20	TCCATTACAAGTGTTTGCCA	57.605	20	186	1613	1798	CAAGGCTATGCCTTTGATGA	58.869	20	TCCATTACAAGTGTTTGCCA	57.605	20	185	1614	1798
F01_transcript_14884	1	p2	(AT)31	62	648	709	TTCCCAATCTCATTGAAGCC	60.014	20	TGCATCAATTGGGACAAATC	59.33	20	198	538	735	TTCCCAATCTCATTGAAGCC	60.014	20	GCATCAATTGGGACAAATCA	59.33	20	197	538	734	GCCTTCCCAATCTCATTGAA	60.014	20	TGCATCAATTGGGACAAATC	59.33	20	201	535	735
F01_transcript_14884	2	p1	(A)21	21	1667	1687	GCAGATCAGATGGCCAGATT	60.189	20	TGTTATGAACCACCAAAACTCTACA	59.855	25	168	1552	1719	TTGGAAGCTAGGGCTGGATA	59.801	20	TGTTATGAACCACCAAAACTCTACA	59.855	25	271	1449	1719	GGCCAGATTGGGAAAGAAAT	60.265	20	TGTTATGAACCACCAAAACTCTACA	59.855	25	157	1563	1719
F01_transcript_14892	1	p3	(ATG)5	15	1406	1420	CCTCATGATTCCGATCCTGT	59.886	20	CCAAAACACCGAGTGATTGA	59.541	20	239	1247	1485	ATGCATTGGTCAACTGGGAT	60.203	20	CCAAAACACCGAGTGATTGA	59.541	20	150	1336	1485	TTGGTTCTTTGGTTGGGCTA	60.472	20	CCAAAACACCGAGTGATTGA	59.541	20	110	1376	1485
F01_transcript_14901	1	c	(TTC)9ttttcctcctcctctcaaatcttctaga(AT)14	83	70	152	CACTCCTTTTCAATTCCCCA	59.903	20	CCGGATGAAAGTAAGATCTGC	58.801	21	179	41	219	GCCCCCTTATCTTCTTTGGA	60.391	20	CCGGATGAAAGTAAGATCTGC	58.801	21	200	20	219	CACTCCTTTTCAATTCCCCA	59.903	20	TCCGGATGAAAGTAAGATCTGC	60.582	22	180	41	220
F01_transcript_14908	1	p1	(C)10	10	1491	1500	CCCTCGTGGTTTGTGAGTTT	60.005	20	AAAAAGAGCGAGGCATCTGA	60.096	20	231	1429	1659	AACTTCCCTCGTGGTTTGTG	60.005	20	AAAAAGAGCGAGGCATCTGA	60.096	20	236	1424	1659	CAACTTCCCTCGTGGTTTGT	60.005	20	AAAAAGAGCGAGGCATCTGA	60.096	20	237	1423	1659
F01_transcript_14910	1	p3	(TTG)9	27	1556	1582	GCATCAGTGGTGGTGACTTG	60.162	20	TTTGCAGGCAGAACATTGAG	59.988	20	165	1517	1681	TGCATCAGTGGTGGTGACTT	60.162	20	TTTGCAGGCAGAACATTGAG	59.988	20	166	1516	1681	TCTTGTGCATCAGTGGTGGT	60.162	20	TTTGCAGGCAGAACATTGAG	59.988	20	171	1511	1681
F01_transcript_14912	1	p1	(T)17	17	1278	1294	TGATACATCGTTGGTGCCAT	59.805	20	ACGGACCCATGTATGGAAAA	60.051	20	150	1251	1400	TGATACATCGTTGGTGCCAT	59.805	20	AACGGACCCATGTATGGAAA	60.051	20	151	1251	1401	TGATACATCGTTGGTGCCAT	59.805	20	ACATTCAAACGGACCCATGT	60.096	20	158	1251	1408
F01_transcript_14914	1	p2	(AG)6	12	657	668	GAAGGAGAAAGCTCGCAAAA	59.708	20	CCAAGCTTGCGTCTTCTTTC	60.132	20	237	607	843	GAAGGAGAAAGCTCGCAAAA	59.708	20	TCCAAGCTTGCGTCTTCTTT	60.132	20	238	607	844	ACTGAAGGAGAAAGCTCGCA	60.277	20	GCAGCTGGCTTTTCAGACTT	59.763	20	279	604	882
F01_transcript_14915	1	p4	(AGAA)7	28	51	78	CATATATTCACCAAACAAATACTCCC	59.064	26	AACACCGAGAGATCACGCTT	59.874	20	220	22	241	CATATATTCACCAAACAAATACTCCC	59.064	26	GAGCTGTTGCCGTTTTGATT	60.257	20	148	22	169	CATATATTCACCAAACAAATACTCCC	59.064	26	TTTGATTGTGGGATGGAAGG	60.692	20	135	22	156
F01_transcript_14916	1	p2	(TA)19	38	118	155	CGCTCAGGAAAGCAACTTTT	59.632	20	ATAAATCGACGTTTGCCTCG	60.096	20	246	63	308	GTCGCTCAGGAAAGCAACTT	59.621	20	ATAAATCGACGTTTGCCTCG	60.096	20	248	61	308	CGCTCAGGAAAGCAACTTTT	59.632	20	GCTCGTCAAACGTCAATGAA	59.847	20	265	63	327
F01_transcript_14927	1	p3	(AAG)7	21	1382	1402	AGGAAGGAAAACCCTGCATT	59.94	20	TGCCTCCTTCACTCGCTTAT	59.978	20	222	1251	1472	AGGAAGGAAAACCCTGCATT	59.94	20	CTCGTCCTCTTCCTCCTCCT	59.945	20	192	1251	1442	CTTGCCGAGGGAGTTAACAG	59.869	20	TGCCTCCTTCACTCGCTTAT	59.978	20	265	1208	1472
F01_transcript_14928	1	p1	(T)10	10	1746	1755	--
F01_transcript_14934	1	p2	(AG)7	14	192	205	ATAATCCCTCCCTCCACCAC	60.015	20	TCATCGTCGAAATTCTTCCC	60.014	20	183	122	304	ATAATCCCTCCCTCCACCAC	60.015	20	GCCATCATCGTCGAAATTCT	60.043	20	187	122	308	ATAATCCCTCCCTCCACCAC	60.015	20	CTGCCTCCTTTCTGCAAATC	59.955	20	129	122	250
F01_transcript_14934	2	p2	(TA)7	14	1744	1757	--
F01_transcript_14935	1	p1	(A)10	10	37	46	CCAGTTTCTTCTCTTCTTGTTGC	59.573	23	TCGGAAAATGAGATCGAAGG	60.148	20	203	10	212	CCAGTTTCTTCTCTTCTTGTTGC	59.573	23	TGGTCTCTCCCTTCCATCAG	60.191	20	249	10	258	CCAGTTTCTTCTCTTCTTGTTGC	59.573	23	CTCCCTTCCATCAGAGGGTT	60.447	20	243	10	252
F01_transcript_14938	1	p3	(AGC)5	15	93	107	GCGATGGCGTTACAGAAAAA	61.131	20	AACGGTCCTTTATACGGCCT	59.856	20	158	63	220	GCGATGGCGTTACAGAAAA	59.824	19	AACGGTCCTTTATACGGCCT	59.856	20	158	63	220	GCGATGGCGTTACAGAAAAA	61.131	20	ACGGTCCTTTATACGGCCTC	60.34	20	157	63	219
F01_transcript_14947	1	p2	(TA)9	18	1718	1735	--
F01_transcript_14954	1	p2	(AG)12	24	1370	1393	TTAGCAACCAATCAGTCGCC	61.168	20	GTCTTCAATCCACAGCAGCA	59.992	20	255	1239	1493	TAGCAACCAATCAGTCGCC	59.814	19	GTCTTCAATCCACAGCAGCA	59.992	20	254	1240	1493	TGGGAAGATTCTTAAGGCGT	58.787	20	GTCTTCAATCCACAGCAGCA	59.992	20	187	1307	1493
F01_transcript_14962	1	p2	(GA)8	16	104	119	TGTTAGAGATTGGTTATGCGGA	59.609	22	CGGCAGCAGTAGAATCATCA	59.972	20	232	79	310	TGTTAGAGATTGGTTATGCGGA	59.609	22	TGATCATGATGCCAAGCATT	60.041	20	199	79	277	TGTTAGAGATTGGTTATGCGGA	59.609	22	AAGTGCGGCAGCAGTAGAAT	60.044	20	237	79	315
F01_transcript_14970	1	p2	(TA)8	16	1715	1730	--
F01_transcript_14975	1	p2	(TA)9	18	168	185	AACCATGGTGATTTTCGTCA	58.824	20	GACGCAAGTTAAGCTCCAGG	60.015	20	147	83	229	AACCATGGTGATTTTCGTCA	58.824	20	AATGATCCGCCATTTGAAAG	59.901	20	233	83	315	AACCATGGTGATTTTCGTCA	58.824	20	GATCCGCCATTTGAAAGAGA	60.155	20	230	83	312
F01_transcript_14979	1	c	(TA)11a(AT)11	45	734	778	GCTTATTTTTGCAAGGCCAA	60.205	20	CCATTCATCATTTTCAGAGAACC	59.828	23	205	710	914	GCTTATTTTTGCAAGGCCAA	60.205	20	CATTCATCATTTTCAGAGAACCA	59.077	23	204	710	913	GCTTATTTTTGCAAGGCCAA	60.205	20	TCATCATTTTCAGAGAACCATCAT	59.841	24	201	710	910
F01_transcript_15004	1	p2	(TC)6	12	53	64	AGGATTTCAATTTTGAGGCG	59.158	20	AGGCAGTAGAGTTCCCAGCA	60.012	20	191	8	198	AGGATTTCAATTTTGAGGCG	59.158	20	GGCAGTAGAGTTCCCAGCAG	60.012	20	190	8	197	AGGATTTCAATTTTGAGGCG	59.158	20	CAGTAGAGTTCCCAGCAGGC	60.012	20	188	8	195
F01_transcript_15008	1	p6	(GGTTCA)7	42	579	620	TTTACAGTGGTGCGAATGGA	60.111	20	CGCCTCTTTTTCTCAGGTTG	59.986	20	262	492	753	TTTACAGTGGTGCGAATGGA	60.111	20	AAGGACAACCGGTCTGAATG	59.966	20	187	492	678	TTTACAGTGGTGCGAATGGA	60.111	20	GAAAGGACAACCGGTCTGAA	60.088	20	189	492	680
F01_transcript_15025	1	p1	(T)12	12	437	448	GTTTTGACCGGTTTGCATCT	59.978	20	TTTTGGCCCCAGTATTCAAC	59.801	20	236	302	537	TTTGAGAAAGTTGGGCATCC	60.051	20	TTTTGGCCCCAGTATTCAAC	59.801	20	204	334	537	GTTTTGACCGGTTTGCATCT	59.978	20	CCAAGCCCTATAGCCGAAAT	60.42	20	255	302	556
F01_transcript_15025	2	p1	(T)14	14	1642	1655	CCGCTTCAAGCTGTACATGA	60.011	20	CAATCTGTCCCTTTGACTTTG	57.318	21	177	1512	1688	TAGCTTTTCAGACAGCGGGT	60.015	20	CAATCTGTCCCTTTGACTTTG	57.318	21	214	1475	1688	CCGTGGCTAGCTTTTCAGAC	60.015	20	CAATCTGTCCCTTTGACTTTG	57.318	21	221	1468	1688
F01_transcript_15040	1	p3	(GAT)5	15	429	443	AGTGGGTATGGCAGGTTACG	59.875	20	ATTATTGGAGGCTTGGGCTT	59.93	20	237	325	561	AGTGGGTATGGCAGGTTACG	59.875	20	AATTATTGGAGGCTTGGGCT	59.93	20	238	325	562	CGCTACATTCACCACCTCCT	60.134	20	ATTATTGGAGGCTTGGGCTT	59.93	20	206	356	561
F01_transcript_15040	2	p2	(TA)6	12	1193	1204	ATGGGGCGCAAGTAGTAATG	59.982	20	ACTCCATCGATCAAAAGCCA	60.603	20	225	1147	1371	ATGGGGCGCAAGTAGTAATG	59.982	20	CACTCCATCGATCAAAAGCC	60.603	20	226	1147	1372	AGCTGATTTGTTTGGATGGG	59.933	20	ACTCCATCGATCAAAAGCCA	60.603	20	240	1132	1371
F01_transcript_15040	3	p2	(AT)19	38	1475	1512	AGCTAGCTGGCTTTTGATCG	59.752	20	CGCTGACCTTGTCTATTTCTCC	60.262	22	267	1345	1611	AGCTAGCTGGCTTTTGATCG	59.752	20	GGTTTGAATTTGATCCTCCATC	59.649	22	239	1345	1583	AGCTAGCTGGCTTTTGATCG	59.752	20	TTGATCCTCCATCAATCTTCAA	59.505	22	230	1345	1574
F01_transcript_15051	1	p1	(T)10	10	1589	1598	CCTTGACCTAGGAATGCAGG	59.688	20	ATTGCATGACCGACTGAGAA	59.245	20	220	1426	1645	CCTTGACCTAGGAATGCAGG	59.688	20	AATTGCATGACCGACTGAGA	59.245	20	221	1426	1646	CCTTGACCTAGGAATGCAGG	59.688	20	TTGCATGACCGACTGAGAAT	59.245	20	219	1426	1644
F01_transcript_15059	1	p3	(GCT)9	27	1633	1659	AGTTTCTCATCTCGGGGGTT	59.935	20	CTACAGAAACAACGGCAGCA	60.05	20	140	1572	1711	AAGTTTCTCATCTCGGGGGT	59.935	20	CTACAGAAACAACGGCAGCA	60.05	20	141	1571	1711	TCCAAGTTTCTCATCTCGGG	60.187	20	CTACAGAAACAACGGCAGCA	60.05	20	144	1568	1711
F01_transcript_15074	1	p2	(AT)6	12	1488	1499	TGTAGCTGGAGGGAAATTGG	60.066	20	CGTGCACACAAATCAAGCAT	60.731	20	241	1427	1667	TGTAGCTGGAGGGAAATTGG	60.066	20	TTACGTGCACACAAATCAAGC	59.79	21	244	1427	1670	CGTTCAGCAGAAGACATTGG	59.44	20	CGTGCACACAAATCAAGCAT	60.731	20	274	1394	1667
F01_transcript_15076	1	p1	(T)10	10	126	135	AAACAAATTAAGCCGCCTCC	60.44	20	CGCGGCCATTACTGTTCTAC	60.658	20	199	14	212	AAACAAATTAAGCCGCCTCC	60.44	20	TATTTGTATTGAAGCGCGGG	60.95	20	219	14	232	AAACAAATTAAGCCGCCTCC	60.44	20	CGCGGCCATTACTGTTCTA	59.841	19	199	14	212
F01_transcript_15076	2	p1	(T)12	12	1611	1622	GTGCCAGGTTGAAGTTGGAT	59.973	20	CAAAAACCTCTCGGCATTGT	60.11	20	199	1527	1725	GTGCCAGGTTGAAGTTGGAT	59.973	20	ACAAAAACCTCTCGGCATTG	60.11	20	200	1527	1726	AACCAATCAGTGTGCCAGGT	60.431	20	CAAAAACCTCTCGGCATTGT	60.11	20	210	1516	1725
F01_transcript_15077	1	p3	(GCT)5	15	1708	1722	GGGCAATCCAGTAGTTCCAA	59.933	20	AAACACAAATCACAAGCTCTTTTA	57.305	24	274	1503	1776	GTGGTACAAGCACCCCAGTC	60.431	20	AAACACAAATCACAAGCTCTTTTA	57.305	24	249	1528	1776	AGGGCAATCCAGTAGTTCCA	59.55	20	AAACACAAATCACAAGCTCTTTTA	57.305	24	275	1502	1776
F01_transcript_15086	1	p3	(GTC)9	27	3	29	--
F01_transcript_15086	2	p2	(TA)23	46	1602	1647	GAGGGTAACTGAAGAGGGGC	60.074	20	CTTTTGCATGCATTTTCCAA	59.679	20	205	1551	1755	GGGTAACTGAAGAGGGGCTC	60.074	20	CTTTTGCATGCATTTTCCAA	59.679	20	203	1553	1755	CTGAAGAGGGGCTCAAATCA	60.331	20	CTTTTGCATGCATTTTCCAA	59.679	20	197	1559	1755
F01_transcript_15088	1	p1	(A)11	11	26	36	AGCCTAGGGGCTGGGAAT	60.95	18	GAAGAGCGATGAGGATCACC	59.768	20	227	2	228	AGCCTAGGGGCTGGGAAT	60.95	18	CGGAAAAAGTAGCGGAGAAA	59.469	20	276	2	277	AGCCTAGGGGCTGGGAAT	60.95	18	GCTTAAGGCACTCAAGCGAA	60.658	20	125	2	126
F01_transcript_15092	1	p2	(TA)6	12	52	63	--
F01_transcript_15093	1	p1	(A)10	10	15	24	--
F01_transcript_15094	1	p1	(T)11	11	448	458	TTGTTCATCAGGGCATGTGT	59.967	20	TATCGCCCATTACACGCATA	59.943	20	133	358	490	TTGTTCATCAGGGCATGTGT	59.967	20	CTCTGCAATAAATCCCTCGG	59.662	20	212	358	569	GACCATGGAGTTGTTGCAGA	59.682	20	TATCGCCCATTACACGCATA	59.943	20	107	384	490
F01_transcript_15097	1	c	(TATC)6atgttcaactgtgtgtttgcaataattattttggtaatttgatgttgtggtgatactggataaagttcaaggttaagctggtttttcatgtt(TGC)5	131	1574	1704	TTCTCGGATTCTGGCACTCT	59.95	20	CGAACATATTCAAAGAATGATGACA	60.245	25	255	1515	1769	CCAGTGTTCGAGTCCACAAA	59.72	20	CGAACATATTCAAAGAATGATGACA	60.245	25	230	1540	1769	TCCAGTGTTCGAGTCCACAA	60.285	20	CGAACATATTCAAAGAATGATGACA	60.245	25	231	1539	1769
F01_transcript_15099	1	p4	(TGTA)6	24	1578	1601	CCAAGGTTGGACTCATGGTT	59.82	20	TTAGCCAAGGCATCACAGAG	59.024	20	196	1445	1640	GATTGACGGCAATTTGATCC	60.282	20	TTAGCCAAGGCATCACAGAG	59.024	20	162	1479	1640	CCAAGGTTGGACTCATGGTT	59.82	20	TTAGCCAAGGCATCACAGAGT	59.89	21	196	1445	1640
F01_transcript_15105	1	p3	(AGG)8	24	1	24	--
F01_transcript_15108	1	p1	(T)11	11	1648	1658	ATTTCGCTGCTTGCTCATTT	59.988	20	AAATGCCAATTGCAGGTGTT	60.374	20	239	1473	1711	AGATTTCGCTGCTTGCTCAT	60.125	20	AAATGCCAATTGCAGGTGTT	60.374	20	241	1471	1711	AGCACTGTGAGCTACGGCTT	60.223	20	AAATGCCAATTGCAGGTGTT	60.374	20	154	1558	1711
F01_transcript_15125	1	p3	(AGA)5	15	452	466	CCCGACTTGTGTGAATCTGA	59.676	20	CGCAACTAGGCAAGTGTTGA	60.05	20	247	414	660	CCCGACTTGTGTGAATCTGA	59.676	20	TCGCAACTAGGCAAGTGTTG	60.05	20	248	414	661	AAACATTATCAGGCACCCCC	60.94	20	CGCAACTAGGCAAGTGTTGA	60.05	20	265	396	660
F01_transcript_15129	1	p3	(GCG)7	21	222	242	CCCGAAATGCACTTTGTTTT	59.975	20	AATCCGTCAAAGTTCAACCG	59.971	20	279	33	311	CGGAGTAACTGCAAATGGTG	59.195	20	TCCATTTCATTGAAGCCCTC	60.014	20	271	176	446	CGAAATGCACTTTGTTTTGG	59.202	20	AATCCGTCAAAGTTCAACCG	59.971	20	277	35	311
F01_transcript_15134	1	p2	(CT)7	14	81	94	TACTTCACACCGCTCTTCCC	60.255	20	CACCTGTTCAATCGCCTTTT	60.11	20	103	37	139	TACTTCACACCGCTCTTCCC	60.255	20	ATACCACCTGTTCAATCGCC	59.82	20	107	37	143	TACTTCACACCGCTCTTCCC	60.255	20	TTGAAACCCAAAACAAACCC	59.679	20	192	37	228
F01_transcript_15134	2	p3	(TTC)5	15	648	662	AATGGTTCGCATGGGTTTAG	59.823	20	TTTGCACATTATGAGGGGTG	59.395	20	207	583	789	AAATGGTTCGCATGGGTTTA	60.188	20	TTTGCACATTATGAGGGGTG	59.395	20	208	582	789	TCTGATGGTCAAATGGTTCG	59.496	20	TTTGCACATTATGAGGGGTG	59.395	20	218	572	789
F01_transcript_15153	1	p2	(AT)8	16	296	311	ACATATGCCCAACCTCCAAA	60.192	20	AGTTGGGCGTCTCGATCTTA	59.836	20	265	141	405	TATGCCCAACCTCCAAATTC	59.762	20	AGTTGGGCGTCTCGATCTTA	59.836	20	262	144	405	CCCAACCTCCAAATTCGATA	59.756	20	AGTTGGGCGTCTCGATCTTA	59.836	20	258	148	405
F01_transcript_15153	2	p3	(GAT)5	15	527	541	TTTCCAAAGTTATCGCGAGG	60.202	20	AGGTGCAAACTCGTATTGGG	59.993	20	244	417	660	TCCAAAGTTATCGCGAGGAT	59.668	20	AGGTGCAAACTCGTATTGGG	59.993	20	242	419	660	TTTCCAAAGTTATCGCGAGG	60.202	20	CATTCACACGAGGTGCAAAC	60.16	20	254	417	670
F01_transcript_15164	1	p2	(TA)22	44	1568	1611	GTTCCTCGGCATGAACTGAT	60.081	20	TGCACAGTCTCCTCTCCTGT	58.535	20	208	1500	1707	CTTTAGGCATTGTTCCTCGG	59.702	20	TGCACAGTCTCCTCTCCTGT	58.535	20	219	1489	1707	CCTTTAGGCATTGTTCCTCG	59.702	20	TGCACAGTCTCCTCTCCTGT	58.535	20	220	1488	1707
F01_transcript_15170	1	p3	(TCT)5	15	115	129	GAGTTCCCGAGGAGGAGAAT	59.636	20	GGGAAGGAGAAGGGAGATTG	60.008	20	165	53	217	GAGTTCCCGAGGAGGAGAAT	59.636	20	TTGTCGGCAATCTGACCATA	60.073	20	148	53	200	GAGTTCCCGAGGAGGAGAAT	59.636	20	GACGATACACGGGAAGGAGA	60.073	20	175	53	227
F01_transcript_15174	1	c	(TC)6tg(TA)7	28	27	54	--
F01_transcript_15189	1	p3	(GAA)5	15	1629	1643	GAACGTCTTCAACCGTTGGT	60.012	20	TGCCGAATGTATAGTTCTGCTG	60.285	22	123	1569	1691	GTCATTCGCACTTTGCGTTA	59.879	20	TGCCGAATGTATAGTTCTGCTG	60.285	22	187	1505	1691	AACCGTTGGTATGTGAAGCC	59.859	20	TGCCGAATGTATAGTTCTGCTG	60.285	22	113	1579	1691
F01_transcript_15191	1	p3	(GTA)5	15	460	474	TTCCAGTCCTTCTTTGGTGG	60.081	20	ACCAGACCCTTGACAACCAG	60.002	20	240	416	655	CACTCAAGGAAGGAATGGGA	60.042	20	TTGATCCCTTACCCTTGCAC	59.933	20	251	361	611	CACTCAAGGAAGGAATGGGA	60.042	20	AACATGTCATCGATGCTCCA	60.08	20	275	361	635
F01_transcript_15197	1	p1	(A)10	10	1737	1746	--
F01_transcript_15208	1	p1	(T)16	16	1593	1608	TGGTGCGAACTTGTCTTCAG	60.025	20	TGTCAATGCATTATTGAGACTGG	60.011	23	251	1490	1740	ATCAGGGCGGACACTATCAG	60.096	20	TGTCAATGCATTATTGAGACTGG	60.011	23	209	1532	1740	AGTTCCACGTATGGCGGTAG	60.015	20	CCATTAATTTGTCCGTCAAAAA	58.891	22	254	1428	1681
F01_transcript_15223	1	p1	(A)11	11	8	18	--
F01_transcript_15223	2	p2	(AT)7	14	823	836	CACTGCTCCCCCAAGAGATA	60.21	20	ATTGCTACAAAACCAACCGC	60.003	20	176	759	934	CACTGCTCCCCCAAGAGATA	60.21	20	ACCGGCCAATTAGGAAAATC	60.15	20	156	759	914	TGCTCCCCCAAGAGATAAAA	59.64	20	ATTGCTACAAAACCAACCGC	60.003	20	173	762	934
F01_transcript_15223	3	p2	(AT)16	32	1691	1722	--
F01_transcript_15228	1	c	(AC)7(TC)7	28	160	187	ACCGGATTCATTTCTCCCTT	59.766	20	GGATGCCGACATTGATTTTT	59.768	20	155	82	236	CCGGATTCATTTCTCCCTTT	60.258	20	GGATGCCGACATTGATTTTT	59.768	20	154	83	236	ACCGGATTCATTTCTCCCTT	59.766	20	GGCAACCAAATCTAAGCCAG	59.708	20	242	82	323
F01_transcript_15229	1	p2	(CT)6	12	79	90	TATTCCCATTTCTGTTCCGC	59.901	20	CGAACTCGACATCTTCCGAT	60.218	20	243	6	248	TATTCCCATTTCTGTTCCGC	59.901	20	ACGTTCCAATTCGAAACCAA	60.344	20	206	6	211	TATTCCCATTTCTGTTCCGC	59.901	20	TATGCTCAGAGGTCAAGGGC	60.362	20	133	6	138
F01_transcript_15229	2	p3	(GAT)5	15	1219	1233	CTCCTGCTGCTGTCACTCAG	59.915	20	TGCATAATGCCATCCTTCAA	60.035	20	199	1153	1351	CTCCTGCTGCTGTCACTCAG	59.915	20	AATGCCATCCTTCAAAGTGC	60.081	20	194	1153	1346	CTCCTGCTGCTGTCACTCAG	59.915	20	CATTTCCACCTGCTCTTGGT	60.111	20	175	1153	1327
F01_transcript_15231	1	p2	(GA)17	34	6	39	--
F01_transcript_15240	1	p1	(T)11	11	75	85	TCATATCCTGCTCCCTCCTC	59.192	20	TGCTTTGCTTACACACCAGC	60.058	20	159	24	182	TCATATCCTGCTCCCTCCTC	59.192	20	GCTTTGCTTACACACCAGCA	60.058	20	158	24	181	TCATATCCTGCTCCCTCCTC	59.192	20	TTGAGGCTCCAATTCCACTC	60.195	20	181	24	204
F01_transcript_15252	1	p2	(AG)8	16	41	56	CCACTCACCCGTATATTCCC	59.126	20	GCTTCAAGGGTCATGGTTGT	59.973	20	159	2	160	CACCCGTATATTCCCAGTCC	59.126	20	GCTTCAAGGGTCATGGTTGT	59.973	20	154	7	160	CACCCGTATATTCCCAGTCC	59.126	20	TATCGGAGTCCATCTCCGTC	60.034	20	190	7	196
F01_transcript_15254	1	p1	(T)12	12	1712	1723	--
F01_transcript_15256	1	p1	(T)13	13	23	35	--
F01_transcript_15270	1	p1	(T)10	10	189	198	TTCGATCTTCCGTTCAATCC	60.014	20	AAGAAGAGACCACCACCACG	60.151	20	190	78	267	TTCGATCTTCCGTTCAATCC	60.014	20	AGCAAGACCCACCAAGAGAA	59.844	20	247	78	324	TTCGATCTTCCGTTCAATCC	60.014	20	AAGCAAGACCCACCAAGAGA	59.844	20	248	78	325
F01_transcript_15277	1	p2	(CA)7	14	68	81	TTGAAAGCTAACAGAGGCCAA	60.004	21	ATTTTGTCAGCTCGGAGTCG	60.397	20	154	21	174	TCAGCCACACTCTCTTTGGTT	59.899	21	ATTTTGTCAGCTCGGAGTCG	60.397	20	173	2	174	AGCCACACTCTCTTTGGTTGA	59.899	21	ATTTTGTCAGCTCGGAGTCG	60.397	20	171	4	174
F01_transcript_15284	1	p3	(TTC)5	15	22	36	--
F01_transcript_15302	1	p2	(CT)6	12	4	15	--
F01_transcript_15306	1	p3	(GGA)5	15	138	152	GAACTCAATCAAGCTCTGCG	58.751	20	AGCGAATTTGGAGAAGACGA	59.955	20	163	93	255	GAACTCAATCAAGCTCTGCG	58.751	20	GCGAATTTGGAGAAGACGAG	59.955	20	162	93	254	GAACTCAATCAAGCTCTGCG	58.751	20	CGAATTTGGAGAAGACGAGC	59.955	20	161	93	253
F01_transcript_15307	1	p2	(CT)17	34	42	75	ATCAAGCAAAGCAAACCCAC	60.118	20	TGAAGAAATCCCAATCCTCG	60.006	20	256	15	270	ATCAAGCAAAGCAAACCCAC	60.118	20	TTTGCACCCTGAAGAAATCC	60.051	20	265	15	279	ATCAAGCAAAGCAAACCCAC	60.118	20	AAATCCAACGGCTGAAAATG	59.938	20	150	15	164
F01_transcript_15313	1	p5	(CTCTC)6	30	20	49	--
F01_transcript_15316	1	p2	(TA)9	18	1583	1600	GGCCATAATTGGGTTGACAC	60.059	20	TCGCTAATAAGAATAAGTGGGG	57.523	22	161	1523	1683	GCCATAATTGGGTTGACACC	60.059	20	TCGCTAATAAGAATAAGTGGGG	57.523	22	160	1524	1683	ACCGTACATGACGGGGAATA	60.074	20	TCGCTAATAAGAATAAGTGGGG	57.523	22	143	1541	1683
F01_transcript_15322	1	p4	(TTTC)5	20	1530	1549	TCAAAATGCATTGTCACCGT	59.972	20	AGTAGTAGCCCTTCCCTGCC	59.735	20	180	1410	1589	TTATCACTGCCCCCTGATGT	60.34	20	CTTTTAGGCCCTCTTCGGAC	60.2	20	242	1466	1707	TTATCACTGCCCCCTGATGT	60.34	20	AGTAGTAGCCCTTCCCTGCC	59.735	20	124	1466	1589
F01_transcript_15323	1	p1	(T)15	15	229	243	GATTCATCGTGTCATCGTCG	60.08	20	CAAGCTGAGAACAACGTGGA	60.025	20	248	186	433	GTCATCGTCGGTGGAAAAAT	59.797	20	CAAGCTGAGAACAACGTGGA	60.025	20	238	196	433	GATTCATCGTGTCATCGTCG	60.08	20	GGTCAGTGAGACGTCGGTTT	60.159	20	164	186	349
F01_transcript_15327	1	p3	(AGC)8	24	20	43	--
F01_transcript_15330	1	p3	(TGA)5	15	376	390	ACTCAAAGCCAATTTGGTGG	59.971	20	AATCATCCAATTTTGCCAGC	59.907	20	184	340	523	CTCAAAGCCAATTTGGTGGT	59.971	20	AATCATCCAATTTTGCCAGC	59.907	20	183	341	523	ACTCAAAGCCAATTTGGTGG	59.971	20	TGCCAGCCGTGTATTTGTTA	60.133	20	241	340	580
F01_transcript_15330	2	p1	(A)10	10	1661	1670	TGTAAAAGATGCCCAAACCC	59.801	20	TTGATCACAAGACAAATTTTGGA	59.483	23	192	1536	1727	AATTGCCAGCAAGTGGAACT	59.74	20	TTGATCACAAGACAAATTTTGGA	59.483	23	264	1464	1727	GTAAAAGATGCCCAAACCCC	60.542	20	TTGATCACAAGACAAATTTTGGA	59.483	23	191	1537	1727
F01_transcript_15357	1	p2	(TA)10	20	1493	1512	AAAATAGCGTCTCGCCTCAA	59.982	20	GTTCGGAACAGCACCAAGTT	60.156	20	196	1389	1584	AAAATAGCGTCTCGCCTCAA	59.982	20	AGTTCGGAACAGCACCAAGT	59.769	20	197	1389	1585	AAAATAGCGTCTCGCCTCAA	59.982	20	AAGTTCGGAACAGCACCAAG	60.291	20	198	1389	1586
F01_transcript_15367	1	c	(AT)17agggtttccatccacagcaaccggttgttcccaacaaccagttactgtggatggaattcc(AT)10t(TA)11	137	744	880	ACTCGATCATTGCGTTTCAT	58.173	20	TGTCAATGTGTCATTGCTTTTT	58.201	22	242	700	941	ACTCGATCATTGCGTTTCAT	58.173	20	GTGTCAATGTGTCATTGCTTTTT	59.057	23	243	700	942	ACTCGATCATTGCGTTTCAT	58.173	20	AGTGTCAATGTGTCATTGCTTTTT	59.975	24	244	700	943
F01_transcript_15367	2	p2	(TA)28	56	1131	1186	TTTCATTAAGGGAACCTGGC	59.019	20	CACCTTGCAGTACATCCCCT	59.989	20	242	1058	1299	TTTCATTAAGGGAACCTGGC	59.019	20	CTTGAACTCCACGTCTGCAA	60.025	20	157	1058	1214	TTTCATTAAGGGAACCTGGC	59.019	20	TTGCAGTCTTGAACTCCACG	60.025	20	164	1058	1221
F01_transcript_15369	1	p1	(T)11	11	97	107	ACGCGGGTTGATCCAATTAT	61.444	20	TATTTGGATTGGGAATGGGA	59.95	20	118	13	130	ACGCGGGTTGATCCAATTAT	61.444	20	GAGGTCATCTCCCTCCCAAT	60.278	20	277	13	289	CGCGGGTTGATCCAATTAT	60.675	19	TATTTGGATTGGGAATGGGA	59.95	20	117	14	130
F01_transcript_15378	1	p1	(T)10	10	69	78	GCAAGAGAGAGAAAGAGGGAAG	58.875	22	AATGTGTGGTGTGAAGCCAA	60.008	20	107	19	125	AGCAAGAGAGAGAAAGAGGGAA	58.875	22	AATGTGTGGTGTGAAGCCAA	60.008	20	108	18	125	AAGCAAGAGAGAGAAAGAGGGA	58.875	22	AATGTGTGGTGTGAAGCCAA	60.008	20	109	17	125
F01_transcript_15385	1	p3	(ATT)5	15	137	151	CCCAGTCCAGATCGGATTTA	59.887	20	GCTGCTGTTGTTGCTGACAT	60.064	20	271	87	357	CAGATCGGATTTAGGCAGGA	60.17	20	GCTGCTGTTGTTGCTGACAT	60.064	20	264	94	357	TCCAGATCGGATTTAGGCAG	60.17	20	GCTGCTGTTGTTGCTGACAT	60.064	20	266	92	357
F01_transcript_15413	1	p2	(TC)6	12	22	33	--
F01_transcript_15427	1	c	(AT)19agagg(GA)6atcaatcaaag(CTC)7	87	186	272	ATTTGCCGGTTATTTCACGA	60.323	20	GAATTTGATTACCGGCGAGA	60.038	20	275	35	309	TTGCCGGTTATTTCACGAAT	60.323	20	GAATTTGATTACCGGCGAGA	60.038	20	273	37	309	GTTTTCTCGACATTCGTCCC	59.532	20	GAATTTGATTACCGGCGAGA	60.038	20	167	143	309
F01_transcript_15429	1	p4	(GATG)6	24	900	923	ACCTACACTTGGCGGATTTG	59.993	20	GGACCACGTACCGATAAACG	60.249	20	269	726	994	TACACTTGGCGGATTTGGAT	60.331	20	GGACCACGTACCGATAAACG	60.249	20	266	729	994	ACCTACACTTGGCGGATTTG	59.993	20	TTGGACCACGTACCGATAAA	58.892	20	271	726	996
F01_transcript_15429	2	p2	(AT)17	34	1246	1279	GGATGGCTGGCTTCAATAAA	60.038	20	CCATGGCACACTAGTCCCTT	59.989	20	266	1102	1367	ATTTTATGGGGTGGGGTTGT	60.166	20	CCATGGCACACTAGTCCCTT	59.989	20	155	1213	1367	ATTTTATGGGGTGGGGTTGT	60.166	20	GCTTTCCTCACCTCCTCCTT	59.817	20	250	1213	1462
F01_transcript_15433	1	p2	(CT)7	14	107	120	GGGTCTCCTGGAAACAGAAA	59.112	20	GTTCGGGTTTTGCAGAAAGA	60.227	20	160	1	160	GGGTCTCCTGGAAACAGAAA	59.112	20	AAGCATTCTCCGGTTTTCAA	59.685	20	210	1	210	GGGTCTCCTGGAAACAGAAA	59.112	20	CAATTCAAAAGGTTGTGCCC	60.344	20	272	1	272
F01_transcript_15438	1	p1	(T)12	12	1738	1749	--
F01_transcript_15445	1	p2	(AT)16	32	1614	1645	ATAAATGATGCAAGCGTCCC	59.929	20	CCATTTGCGCAGCATTATAC	59.197	20	205	1506	1710	GTGACTTCAGTGGAGGGGAA	60.088	20	CCATTTGCGCAGCATTATAC	59.197	20	226	1485	1710	TGGGCAAACAGTGACTTCAG	59.873	20	CCATTTGCGCAGCATTATAC	59.197	20	236	1475	1710
F01_transcript_15446	1	p3	(AAG)8	24	11	34	--
F01_transcript_15447	1	p1	(T)10	10	648	657	AAAATGCTGGACTGATTGTGC	60.133	21	GGACGGAGGGAGTATAACTCGT	60.732	22	208	572	779	AAATGCTGGACTGATTGTGCT	59.755	21	GGACGGAGGGAGTATAACTCGT	60.732	22	207	573	779	AAATGCTGGACTGATTGTGC	58.726	20	GGACGGAGGGAGTATAACTCGT	60.732	22	207	573	779
F01_transcript_15450	1	c*	(A)10g(A)10(AG)7*	34	14	47	--
F01_transcript_15458	1	p1	(T)11	11	182	192	ATACGGCTCGAATCCTCTCA	59.797	20	CACCTCCTCCCTTCAATTACA	59.038	21	223	148	370	ACGGCTCGAATCCTCTCATA	59.797	20	CACCTCCTCCCTTCAATTACA	59.038	21	221	150	370	TACGGCTCGAATCCTCTCAT	59.797	20	CACCTCCTCCCTTCAATTACA	59.038	21	222	149	370
F01_transcript_15465	1	p1	(T)12	12	1617	1628	AGTTCCACGTATGGCGGTAG	60.015	20	CCATTAATTTGTCCGTCAAAAA	58.891	22	249	1452	1700	TGGTGCGAACTTGTCTTCAG	60.025	20	CCATTAATTTGTCCGTCAAAAA	58.891	22	187	1514	1700	AGTTCCACGTATGGCGGTAG	60.015	20	CCTACCATTAATTTGTCCGTCA	58.875	22	253	1452	1704
F01_transcript_15468	1	p1	(T)12	12	127	138	AAACAAATTAAGCCGCCTCC	60.44	20	TCTCGAAAATTTCCGGTGAG	60.184	20	270	15	284	ATTAAGCCGCCTCCATCAAT	60.792	20	TCTCGAAAATTTCCGGTGAG	60.184	20	264	21	284	GCCTCCATCAATTCCTGACT	59.094	20	TCTCGAAAATTTCCGGTGAG	60.184	20	256	29	284
F01_transcript_15468	2	p1	(T)10	10	1574	1583	GTGCCAGGTTGAAGTTGGAT	59.973	20	CAAAAACCTCTCGACATTGTTC	58.743	22	205	1482	1686	GTGCCAGGTTGAAGTTGGAT	59.973	20	ACAAAAACCTCTCGACATTGTTC	59.556	23	206	1482	1687	TAACCAATCAGTGTGCCAGG	59.566	20	CAAAAACCTCTCGACATTGTTC	58.743	22	217	1470	1686
F01_transcript_15483	1	p3	(CCT)8	24	42	65	CGGGTCGGGTCTTTCTCTAT	60.455	20	GAGTGGCCATTGTTGTTGTG	60.008	20	161	19	179	CGGGTCGGGTCTTTCTCTAT	60.455	20	AGTGGCCATTGTTGTTGTGA	60.008	20	160	19	178	CGGGTCGGGTCTTTCTCTAT	60.455	20	GGAGAGTGGCCATTGTTGTT	59.973	20	164	19	182
F01_transcript_15483	2	p3	(CTC)6	18	192	209	AACAACAATGGCCACTCTCC	59.973	20	GATGCGGGAGACATTGAGAT	60.042	20	178	163	340	AACAACAATGGCCACTCTCC	59.973	20	ATGAGACGGTTATCGGATCG	59.917	20	114	163	276	AACAACAATGGCCACTCTCC	59.973	20	GGAGACATTGAGATCGAGGC	59.768	20	172	163	334
F01_transcript_15488	1	c	(TA)18(GA)17	70	1553	1622	GAAACCGTATTTCTCGCTCG	59.845	20	CCTTCTCCCACACTCGTACC	59.574	20	147	1521	1667	CCGTATTTCTCGCTCGTCTT	59.476	20	CCTTCTCCCACACTCGTACC	59.574	20	143	1525	1667	GAAACCGTATTTCTCGCTCG	59.845	20	TCTCCCACACTCGTACCAAA	59.135	20	144	1521	1664
F01_transcript_15493	1	p1	(A)11	11	714	724	GACCGGGATGTATCCAATTTT	59.902	21	AATTTTACGGTCCCTACCCG	60.068	20	235	520	754	GACCGGGATGTATCCAATTTT	59.902	21	GCTATCAAAACGATGTCGCA	59.839	20	275	520	794	CCGGGATGTATCCAATTTTT	58.622	20	AATTTTACGGTCCCTACCCG	60.068	20	233	522	754
F01_transcript_15506	1	p2	(AT)12	24	47	70	--
F01_transcript_15506	2	p2	(AG)6	12	1503	1514	TGCGTGCCTCTTTTATTTTCA	60.735	21	AACAACACCACCACATTTCG	59.314	20	107	1458	1564	GCGTGCCTCTTTTATTTTCA	58.044	20	AACAACACCACCACATTTCG	59.314	20	106	1459	1564	TGCGTGCCTCTTTTATTTTC	58.044	20	AACAACACCACCACATTTCG	59.314	20	107	1458	1564
F01_transcript_15509	1	p2	(GA)7	14	402	415	TGTTTCCAGATCCAAGGGAG	60.042	20	TTGCACTCCATCAACTGCTC	59.992	20	115	366	480	TGTTTCCAGATCCAAGGGAG	60.042	20	GAGCATTTCCACCTATCCGA	60.036	20	279	366	644	GTGTTTCCAGATCCAAGGGA	59.903	20	TTGCACTCCATCAACTGCTC	59.992	20	116	365	480
F01_transcript_15511	1	p3	(ATC)10	30	102	131	TTACCCACACAGGCACACAT	59.88	20	GAGAATTGCCATCACGGTTT	59.939	20	172	37	208	TTACCCACACAGGCACACAT	59.88	20	GAGGACGAAGAGAATTGCCA	60.34	20	181	37	217	GTCCTTACCCACACAGGCAC	60.431	20	GAGAATTGCCATCACGGTTT	59.939	20	176	33	208
F01_transcript_15516	1	p3	(AAG)5	15	1627	1641	AGAGCTGACGAGGGCATAGA	60.119	20	TTTTTCCCGCTTTGACATTC	60.053	20	127	1572	1698	GAGAGCTGACGAGGGCATAG	60.119	20	TTTTTCCCGCTTTGACATTC	60.053	20	128	1571	1698	AGAGAGCTGACGAGGGCATA	60.119	20	TTTTTCCCGCTTTGACATTC	60.053	20	129	1570	1698
F01_transcript_15524	1	p3	(TTG)6	18	45	62	TTCATCATTGCATTCTTTTGTT	57.311	22	GTTGCTGGGTAATGCTGGTT	60	20	114	20	133	TTCATCATTGCATTCTTTTGTT	57.311	22	CTTTTCTGGCGAACCTGAAG	59.986	20	219	20	238	TTCATCATTGCATTCTTTTGTT	57.311	22	CTGGGTAATGCTGGTTCGAT	59.955	20	110	20	129
F01_transcript_15527	1	p3	(TGA)5	15	404	418	ACTCAAAGCCAATTTGGTGG	59.971	20	AATCATCCAATTTTGCCAGC	59.907	20	184	368	551	CTCAAAGCCAATTTGGTGGT	59.971	20	AATCATCCAATTTTGCCAGC	59.907	20	183	369	551	ACTCAAAGCCAATTTGGTGG	59.971	20	TGCCAGCCGTGTATTTGTTA	60.133	20	241	368	608
F01_transcript_15527	2	p1	(A)10	10	1689	1698	--
F01_transcript_15528	1	p1	(T)19	19	1655	1673	GCTGCCTAGATTACCACCCA	60.096	20	AAAGGAAAAGTAGATAACATAAGGGAA	58.379	27	153	1569	1721	GCTGCCTAGATTACCACCCA	60.096	20	AAGGAAAAGTAGATAACATAAGGGAA	57.272	26	152	1569	1720	GCTGCCTAGATTACCACCCA	60.096	20	AAAGGAAAAGTAGATAACATAAGGGA	57.272	26	153	1569	1721
F01_transcript_15536	1	p3	(GAT)8	24	853	876	CGGAACTGCCTACAAAAAGG	59.741	20	CTCAGCACCAAGTCCAGGAT	60.261	20	204	737	940	CCGGAACTGCCTACAAAAAG	59.741	20	CTCAGCACCAAGTCCAGGAT	60.261	20	205	736	940	GGAGACGGAACGACTCAAGA	60.386	20	CTCAGCACCAAGTCCAGGAT	60.261	20	276	665	940
F01_transcript_15549	1	p2	(TA)12	24	185	208	CGACGGAGGAAGACAAGAAG	59.982	20	TGGATAAAATCGCAATTCTCG	60.047	21	235	115	349	CGACGGAGGAAGACAAGAAG	59.982	20	CAAAACCTGGATAAAATCGCA	59.95	21	242	115	356	AGCGAAGAAGATGTCAGGGA	59.95	20	TGGATAAAATCGCAATTCTCG	60.047	21	264	86	349
F01_transcript_15549	2	p6	(TGTATG)7	42	447	488	CGAGAATTGCGATTTTATCCA	60.047	21	TGAGCAAATCAATGTCAGCA	58.942	20	207	329	535	TGCGATTTTATCCAGGTTTTG	59.95	21	TGAGCAAATCAATGTCAGCA	58.942	20	200	336	535	CGAGAATTGCGATTTTATCCA	60.047	21	AGAAATGAAGGGCAAATGCT	58.789	20	273	329	601
F01_transcript_15549	3	p1	(C)17	17	1702	1718	--
F01_transcript_15564	1	p3	(TCC)5	15	187	201	GGCATCGTCTTCATCAACCT	60.081	20	TGAAGAGAGCAATAGCGGGT	59.978	20	126	162	287	GGCATCGTCTTCATCAACCT	60.081	20	ATAGCGGGTATTGCATCGAG	60.081	20	115	162	276	GGCATCGTCTTCATCAACCT	60.081	20	GCAATCCATCTCTTCTTCCG	59.773	20	277	162	438
F01_transcript_15564	2	p3	(GAT)5	15	1456	1470	GGCAGTAGAAAGGATGCTGC	59.985	20	TACCAGGTTTCCAGGTTTGC	59.971	20	222	1318	1539	GGCAGATAAGGGTGTGGCTA	60.096	20	TACCAGGTTTCCAGGTTTGC	59.971	20	253	1287	1539	CTATGGCTTGTACGGGCAGT	60.154	20	TACCAGGTTTCCAGGTTTGC	59.971	20	236	1304	1539
F01_transcript_15570	1	p3	(ATA)5	15	492	506	AAACCACCACCATCACCACT	60.135	20	TCTGCCAATCTCTCTCCTCC	59.486	20	230	312	541	GCTTAACAACGCGATTCTCC	59.851	20	TCTGCCAATCTCTCTCCTCC	59.486	20	257	285	541	GGCTTAACAACGCGATTCTC	59.851	20	TCTGCCAATCTCTCTCCTCC	59.486	20	258	284	541
F01_transcript_15570	2	p3	(GAT)5	15	914	928	ACCCCCTCGATGATAAGGAC	60.154	20	GACCAAATCCCATGCTGTCT	59.934	20	276	719	994	ACCCCCTCGATGATAAGGAC	60.154	20	AAATCCCATGCTGTCTGGTC	59.934	20	272	719	990	ACATGTTCGAGTTCATGCGA	60.272	20	CGTGCTTTAACTCCTGCCTC	60.015	20	257	801	1057
F01_transcript_15571	1	p2	(TA)7	14	130	143	TCCCAAACCACAATCCATTT	60.029	20	GTTTTGAGTTGGGCGATTGT	59.978	20	256	30	285	TCTCCCAAACCACAATCCAT	60.173	20	GTTTTGAGTTGGGCGATTGT	59.978	20	258	28	285	TCCCAAACCACAATCCATTT	60.029	20	TCTAACCCATCTCTGCTCCG	60.353	20	208	30	237
F01_transcript_15575	1	p1	(T)16	16	1577	1592	GCTGCCTAGATTACCACCCA	60.096	20	TTGGAGCCACATAAAGGAAAA	59.573	21	162	1491	1652	GCTGCCTAGATTACCACCCA	60.096	20	TTTGGAGCCACATAAAGGAAA	59.573	21	163	1491	1653	TACTTGGGTCGTAAGCTGCC	60.27	20	TTGGAGCCACATAAAGGAAAA	59.573	21	176	1477	1652
F01_transcript_15588	1	p2	(AT)13	26	1617	1642	TGCAAAAAGAAGAACCACTCTC	58.627	22	GGACAATCGATTTGAATTCCT	57.979	21	232	1496	1727	GCAAAAAGAAGAACCACTCTCA	58.627	22	GGACAATCGATTTGAATTCCT	57.979	21	231	1497	1727	TGTCGCTTCTTTGATCCACA	60.39	20	AAAACAATTTGTACATATCAAGGCA	58.951	25	269	1404	1672
F01_transcript_15596	1	p3	(TTC)5	15	202	216	AAAACAATCCCCCAATCCTC	59.996	20	GGCAGCTTTGTCTAACTGGG	59.875	20	273	123	395	AAAACAATCCCCCAATCCTC	59.996	20	GCAGCTTTGTCTAACTGGGG	59.875	20	272	123	394	AAAACAATCCCCCAATCCTC	59.996	20	CTTTGTCTAACTGGGGAGCG	59.869	20	268	123	390
F01_transcript_15597	1	c	(TA)17(CA)10	54	139	192	GCGCACATTTTCTTGTCTGA	59.995	20	GAGAAAATCCACCAGACCCA	59.903	20	271	35	305	AGAGACGCGCACATTTTCTT	60.022	20	GAGAAAATCCACCAGACCCA	59.903	20	277	29	305	TTGGCATTTTGAACCCTTTC	59.916	20	GAGAAAATCCACCAGACCCA	59.903	20	214	92	305
F01_transcript_15598	1	p1	(T)10	10	269	278	TGAGCTCTTCAAGCTCTCCC	59.827	20	AAGACGAGATTCCTTGGCCT	60.212	20	111	230	340	CACACCCAGTCTCTGTTCCA	59.705	20	AAGACGAGATTCCTTGGCCT	60.212	20	256	85	340	CACTCCTTTTCCCCCAGAAT	60.298	20	AAGACGAGATTCCTTGGCCT	60.212	20	238	103	340
F01_transcript_15598	2	p2	(TA)20	40	1531	1570	TTGAGACCTTTTGTCCCGTC	60.088	20	TCCAAAACACTCAACCCTCA	59.109	20	206	1458	1663	TTGAGACCTTTTGTCCCGTC	60.088	20	TCCAAAACACTCAACCCTCAC	59.997	21	206	1458	1663	TTGAGACCTTTTGTCCCGTC	60.088	20	AAACACTCAACCCTCACATGC	60.028	21	202	1458	1659
F01_transcript_15602	1	p1	(T)10	10	91	100	TCCATCTGGGTTTTCATACCT	58.372	21	GTGGGTTCAGCCTCCTGATA	60.073	20	123	36	158	TCCATCTGGGTTTTCATACCT	58.372	21	CTTCCAGCAGGATACCGTGT	60.134	20	210	36	245	AATCCATCTGGGTTTTCATACCT	59.965	23	GTGGGTTCAGCCTCCTGATA	60.073	20	125	34	158
F01_transcript_15608	1	p1	(T)12	12	1630	1641	GCCATACTTGAGAAGGGATCA	59.14	21	GTGTCGCGGCAACATTAGAT	61.063	20	266	1426	1691	GCCATACTTGAGAAGGGATCA	59.14	21	TGTCGCGGCAACATTAGAT	60.235	19	265	1426	1690	GGAATGCCATACTTGAGAAGG	58.659	21	GTGTCGCGGCAACATTAGAT	61.063	20	271	1421	1691
F01_transcript_15613	1	p1	(T)10	10	1711	1720	--
F01_transcript_15618	1	p1	(T)12	12	195	206	ACAATTAATCGGAGGTTGCG	59.96	20	AATGATGTGCCCTTCTCTGG	60.073	20	275	159	433	ACAATTAATCGGAGGTTGCG	59.96	20	CCAATGATGTGCCCTTCTCT	60.073	20	277	159	435	AGGTTGCGAAAATTGGATTG	59.938	20	AATGATGTGCCCTTCTCTGG	60.073	20	263	171	433
F01_transcript_15619	1	p3	(GGA)11	33	1	33	--
F01_transcript_15634	1	p2	(AG)13	26	74	99	TTGGTTGTTTTTCCTTCGTTG	59.997	21	CTGGAGGATGCAATCGAAAT	60.036	20	271	32	302	TTGGTTGTTTTTCCTTCGTTG	59.997	21	TTGGCGTGCTACAAAATTGA	60.251	20	137	32	168	TTGGTTGTTTTTCCTTCGTTG	59.997	21	TAGTCTAGGACGGCCACAGG	60.269	20	100	32	131
F01_transcript_15645	1	c	(TC)8ctc(T)17	36	46	81	--
F01_transcript_15645	2	p2	(TA)24	48	1449	1496	CGTGACAGCTCTCAAGTCCA	60.178	20	GGTAGAATTGGAACCCAGCA	59.933	20	205	1324	1528	CGTGACAGCTCTCAAGTCCA	60.178	20	TGGTAGAATTGGAACCCAGC	59.933	20	206	1324	1529	CGTGACAGCTCTCAAGTCCA	60.178	20	AGAATTGGAACCCAGCATTG	59.933	20	202	1324	1525
F01_transcript_15655	1	p3	(CTC)6	18	1618	1635	TTTAAATTACGGTCGGTCGC	59.964	20	TGTCTTTTAAACTTGGCATGGA	59.625	22	120	1541	1660	ACCAGCACTCCATTTTCCAG	60.111	20	TGTCTTTTAAACTTGGCATGGA	59.625	22	141	1520	1660	CCAAGGAAAAACAAACCAGC	59.587	20	TGTCTTTTAAACTTGGCATGGA	59.625	22	155	1506	1660
F01_transcript_15657	1	p2	(GA)8	16	15	30	--
F01_transcript_15657	2	p1	(A)11	11	1586	1596	TGCCAGCATGCTAATAGACG	59.999	20	CAAAAGCCAGATATTCTACAAGGG	60.355	24	240	1457	1696	TCCAAGAAGAGGAAGAGCCA	60.065	20	CAAAAGCCAGATATTCTACAAGGG	60.355	24	181	1516	1696	AACAGGGTGGTACAGTTGCC	59.891	20	CAAAAGCCAGATATTCTACAAGGG	60.355	24	256	1441	1696
F01_transcript_15659	1	p3	(CAG)5	15	359	373	TCGATCAGCAGTATTCGACG	59.972	20	TGATGGCCCGTATTTATCGT	60.175	20	272	127	398	TCGATCAGCAGTATTCGACG	59.972	20	CTGATGGCCCGTATTTATCG	60.302	20	273	127	399	CGATCATGGCAGTTGTTGAG	60.263	20	GTCAGCAGCCGTACCGTTAT	60.162	20	257	170	426
F01_transcript_15677	1	p1	(T)10	10	56	65	ATTTTTGTCAGCCCCCTCTC	60.443	20	CATCAATGCTTGTTGCTGCT	60.019	20	206	27	232	GATTTTTGTCAGCCCCCTCT	60.443	20	CATCAATGCTTGTTGCTGCT	60.019	20	207	26	232	AGATTTTTGTCAGCCCCCTC	60.443	20	CATCAATGCTTGTTGCTGCT	60.019	20	208	25	232
F01_transcript_15692	1	p2	(AG)6	12	151	162	ACGGGGAAGCTTAAGATGGT	59.962	20	AAAACCCTTGGAAAACCCAC	60.068	20	270	29	298	ACGGGGAAGCTTAAGATGGT	59.962	20	TGCAAAAACGAATCAAAGCA	60.369	20	158	29	186	AACGGGGAAGCTTAAGATGG	60.443	20	AAAACCCTTGGAAAACCCAC	60.068	20	271	28	298
F01_transcript_15694	1	p3	(CCA)5	15	122	136	GTTCCTTCTTCCTCGCTCCT	59.957	20	TGCCTCTTCTCGGAACAAGT	59.989	20	135	76	210	AGTTCCTTCTTCCTCGCTCC	59.957	20	TGCCTCTTCTCGGAACAAGT	59.989	20	136	75	210	GTTCCTTCTTCCTCGCTCCT	59.957	20	ACAAACGTCGGTCAATCTCC	59.973	20	268	76	343
F01_transcript_15707	1	p2	(CT)12	24	41	64	TCACCCTCTTACAGTCTTACTCCC	60.056	24	TCTTGGTCTCAACCAAACCC	59.943	20	166	4	169	TCACCCTCTTACAGTCTTACTCCC	60.056	24	GGGTTTGGATTTGGCTTTTT	60.164	20	277	4	280	TCACCCTCTTACAGTCTTACTCCC	60.056	24	TGGTCTCAACCAAACCCAAT	60.21	20	163	4	166
F01_transcript_15714	1	p1	(T)10	10	283	292	GGTTCCCACCTGTGTTGTTT	59.721	20	AGTGGCACTGCAACCTTCTT	59.914	20	259	183	441	GGTTCCCACCTGTGTTGTTT	59.721	20	AAGTGGCACTGCAACCTTCT	59.914	20	260	183	442	GGTTCCCACCTGTGTTGTTT	59.721	20	AATGCCCATGGCATACAAGT	60.221	20	276	183	458
F01_transcript_15722	1	p3	(TAC)5	15	990	1004	CATCTTCCCTTCCTTCCCTC	60.008	20	CCATTACGGCTTCGTTTGTT	59.996	20	235	805	1039	CCAATCATGGCGATCTCTTT	60.036	20	CCATTACGGCTTCGTTTGTT	59.996	20	261	779	1039	AATTATGCACGACATTGCCA	59.96	20	CCATTACGGCTTCGTTTGTT	59.996	20	132	908	1039
F01_transcript_15724	1	p1	(A)10	10	4	13	--
F01_transcript_15729	1	p3	(AGC)8	24	18	41	--
F01_transcript_15733	1	p3	(AGC)8	24	53	76	AGACGAAGATGAAGTTTTGCG	59.508	21	TTGGGCTGTGTTGATTTGAA	60.088	20	262	7	268	GACGAAGATGAAGTTTTGCG	58.502	20	TTGGGCTGTGTTGATTTGAA	60.088	20	261	8	268	GACGAAGATGAAGTTTTGCGT	59.373	21	TTGGGCTGTGTTGATTTGAA	60.088	20	261	8	268
F01_transcript_15735	1	p1	(T)10	10	1732	1741	--
F01_transcript_15737	1	p2	(AG)8	16	1640	1655	CATCTCCAGAGGCCACTCTC	59.945	20	CCAAAGACCTGTAACAGAAGTGC	60.212	23	250	1474	1723	GTCTTCAACGGGATCCGTAA	59.933	20	CCAAAGACCTGTAACAGAAGTGC	60.212	23	165	1559	1723	TTTACATCGACCGACCATCA	59.924	20	CCAAAGACCTGTAACAGAAGTGC	60.212	23	230	1494	1723
F01_transcript_15742	1	p3	(CGC)7	21	302	322	TAATCCGAAACCCCCAATTT	60.361	20	ACCTTCAAGTTCCCAAGGCT	60.11	20	258	219	476	AGATTAATCCGAAACCCCCA	60.502	20	ACCTTCAAGTTCCCAAGGCT	60.11	20	262	215	476	TAATCCGAAACCCCCAATTT	60.361	20	TTCCCAAGGCTCAGATTTGT	59.67	20	249	219	467
F01_transcript_15747	1	p3	(TTC)5	15	1535	1549	GACTGATGGATCCTCGGAGA	60.16	20	ACCATCTGCCAAGAATGGAA	60.461	20	265	1437	1701	CTGATGGATCCTCGGAGAAG	59.755	20	ACCATCTGCCAAGAATGGAA	60.461	20	263	1439	1701	TGATGGATCCTCGGAGAAGA	60.703	20	ACCATCTGCCAAGAATGGAA	60.461	20	262	1440	1701
F01_transcript_15752	1	c	(TC)7tt(CAAC)5	36	468	503	GTTGGGGTTGGACTCGTGTA	60.812	20	TCCCATTCATTTTCCGCTAC	59.901	20	251	372	622	GTTGGGGTTGGACTCGTGTA	60.812	20	CATTTCCCATTCATTTTCCG	60.124	20	255	372	626	GTTTCTCTCCTGCACAACGC	60.986	20	ATTCATTTTCCGCTACACCG	59.96	20	273	346	618
F01_transcript_15758	1	p1	(T)11	11	1590	1600	CTGCACATGCAAAGCAGATT	60.019	20	GAAAGGAGAAAGAAATTCAAATGG	59.524	24	240	1445	1684	CTGCACATGCAAAGCAGATT	60.019	20	GAAAGAAATTCAAATGGTTCAACA	59.416	24	233	1445	1677	GTGGCAAAGAAAACCAGAGC	59.859	20	GAAAGGAGAAAGAAATTCAAATGG	59.524	24	267	1418	1684
F01_transcript_15763	1	p2	(GA)9	18	46	63	CCTGATTTTATAGAGCGAGAACG	59.445	23	CCAACTAAACAGGGCGGATA	59.953	20	112	18	129	CCTGATTTTATAGAGCGAGAACG	59.445	23	TATCGGCCAACTAAACAGGG	59.953	20	118	18	135	CCTGATTTTATAGAGCGAGAACG	59.445	23	TAAACAGGGCGGATACCATC	59.784	20	107	18	124
F01_transcript_15764	1	p4	(CCCT)8	32	1526	1557	TTGCAAATGACCTGAAGCAC	59.847	20	CACACTTCACTAACTAAATTGCAACA	59.707	26	113	1482	1594	GTCCAGCTTGACCCTGAAAA	60.232	20	CACACTTCACTAACTAAATTGCAACA	59.707	26	251	1344	1594	TCCAGCTTGACCCTGAAAAT	59.67	20	CACACTTCACTAACTAAATTGCAACA	59.707	26	250	1345	1594
F01_transcript_15783	1	p2	(CT)7	14	9	22	--
F01_transcript_15793	1	p2	(AT)6	12	8	19	--
F01_transcript_15795	1	p1	(T)10	10	3	12	--
F01_transcript_15796	1	p1	(C)19	19	111	129	TACGAACGCGATCAAATCAA	60.215	20	AGCACAGAAATTCTTCGGGA	59.813	20	129	74	202	TACGAACGCGATCAAATCAA	60.215	20	GGCACACACAGCACAGAAAT	59.758	20	138	74	211	GCCACCTAAAGCGGGTTATT	60.332	20	AGCACAGAAATTCTTCGGGA	59.813	20	200	3	202
F01_transcript_15798	1	p1	(T)16	16	281	296	AATTACCCCCAACACCACAA	59.948	20	CCTGCACCCATCTTTCAAAC	60.495	20	212	113	324	ATTACCCCCAACACCACAAC	59.43	20	CCTGCACCCATCTTTCAAAC	60.495	20	211	114	324	AATTACCCCCAACACCACAA	59.948	20	CTTCAGCTGCGGTCTTCTTG	61.243	20	259	113	371
F01_transcript_15805	1	p1	(T)10	10	1598	1607	TATGCAGACAGCCAGTGGAG	60.008	20	TGCAGGAGAGAGGGAGGTAA	59.943	20	183	1465	1647	CAGTGGAGAGGCTTTTGGAG	59.982	20	TGCAGGAGAGAGGGAGGTAA	59.943	20	171	1477	1647	CTGCTTTGTCCGTGCTGTAA	60.05	20	TGCAGGAGAGAGGGAGGTAA	59.943	20	106	1542	1647
F01_transcript_15810	1	p1	(T)12	12	1657	1668	TGGTGCTCCTCTGCCTATTT	59.836	20	TGTTCAAACCAAAACAAGAACAA	59.561	23	185	1518	1702	GGTGCTCCTCTGCCTATTTG	59.836	20	TTGTTCAAACCAAAACAAGAACA	59.561	23	185	1519	1703	GGTGCTCCTCTGCCTATTTG	59.836	20	TGTTGTTCAAACCAAAACAAGAA	59.561	23	187	1519	1705
F01_transcript_15816	1	p2	(CT)9	18	777	794	AGAGTCCATTTCGCATGACC	60.081	20	GCGTTACTAGGAGCAGTGGG	59.898	20	226	607	832	AGAGTCCATTTCGCATGACC	60.081	20	ATTAGGTTGCACTGGAGCGT	59.763	20	242	607	848	AGAGTCCATTTCGCATGACC	60.081	20	GGATTAGGTTGCACTGGAGC	59.7	20	244	607	850
F01_transcript_15817	1	p2	(AT)25	50	1457	1506	GATTGGTCAAGTGGAAACGG	60.353	20	TCGATCTCCAGCCTTTTCAT	59.773	20	246	1325	1570	TACGACGATTGGTCAAGTGG	59.566	20	TCGATCTCCAGCCTTTTCAT	59.773	20	252	1319	1570	ATTGGTCAAGTGGAAACGGT	59.308	20	TCGATCTCCAGCCTTTTCAT	59.773	20	245	1326	1570
F01_transcript_15827	1	p2	(CT)6	12	38	49	GTGCAGAGAGCTTCGGTTTC	60.142	20	CGGACCGAAAGATAGCAGAG	59.971	20	120	2	121	GTGCAGAGAGCTTCGGTTTC	60.142	20	ATCCAAGACGGAACTTGTCG	60.111	20	234	2	235	GTGCAGAGAGCTTCGGTTTC	60.142	20	TTGTCGTTGCAGAACCCATA	60.111	20	220	2	221
F01_transcript_15829	1	p1	(T)10	10	279	288	TCCCAATCTCCCATTTCTTC	58.909	20	TTTATCCATCATCCCCTCCA	60.088	20	226	132	357	CCCAATCTCCCATTTCTTCTC	59.889	21	TTTATCCATCATCCCCTCCA	60.088	20	225	133	357	TCCCAATCTCCCATTTCTTCT	59.889	21	TTTATCCATCATCCCCTCCA	60.088	20	226	132	357
F01_transcript_15831	1	p1	(T)10	10	1671	1680	TATGCCACGTTGGTTCTTCA	60.111	20	CAAATATCAATCATAAGGACAAAATAA	57.045	27	274	1451	1724	CCACGTTGGTTCTTCAGACA	59.72	20	CAAATATCAATCATAAGGACAAAATAA	57.045	27	270	1455	1724	GCCACGTTGGTTCTTCAGAC	60.7	20	CAAATATCAATCATAAGGACAAAATAA	57.045	27	271	1454	1724
F01_transcript_15832	1	p3	(AAG)6	18	55	72	TGTAAAATCAAGAGCGAGCG	59.206	20	TTGCATAGAAACGTTGACGC	59.879	20	249	31	279	TGTAAAATCAAGAGCGAGCG	59.206	20	CGCTGATGACAGCTCTATGG	59.572	20	145	31	175	TGTAAAATCAAGAGCGAGCG	59.206	20	CTGATGACAGCTCTATGGCG	59.572	20	143	31	173
F01_transcript_15839	1	p3	(CAT)8	24	126	149	CTAAGGCCACTAGAACCCCC	59.955	20	TGCTTGTCGATCAAGTGGAG	59.984	20	256	50	305	CCTAAGGCCACTAGAACCCC	59.955	20	TGCTTGTCGATCAAGTGGAG	59.984	20	257	49	305	CCCTAAGGCCACTAGAACCC	59.955	20	TGCTTGTCGATCAAGTGGAG	59.984	20	258	48	305
F01_transcript_15847	1	p3	(CAA)6	18	168	185	CCTCCAATGGATCCTTCTCA	60.003	20	GTGATAATACATCGGCGGCT	59.951	20	162	92	253	CCTCCAATGGATCCTTCTCA	60.003	20	CTGTGGTTGTTGTTGCTGCT	59.946	20	222	92	313	CCTCCAATGGATCCTTCTCA	60.003	20	AAAGTGTGCGGATCTCGTCT	59.874	20	277	92	368
F01_transcript_15847	2	p5	(CCTCT)5	25	1576	1600	TGCAAGTCATCCAGATGTGC	60.852	20	AACTGAAACCCAATCATGCC	59.797	20	249	1417	1665	GTGGCATTGCAAGTCATCC	60.072	19	AACTGAAACCCAATCATGCC	59.797	20	256	1410	1665	GTCTCTTCTGGCTCTGCCC	60.088	19	AACTGAAACCCAATCATGCC	59.797	20	120	1546	1665
F01_transcript_15863	1	p1	(T)13	13	1470	1482	TTGGGCTGCCTGAATATTGT	60.469	20	CAGCATTGTTTCCGATGGAT	60.864	20	197	1319	1515	GTTACTGACTTGGGCTGCCT	59.357	20	CAGCATTGTTTCCGATGGAT	60.864	20	206	1310	1515	TTGGGCTGCCTGAATATTGT	60.469	20	AACTCAGCATTGTTTCCGATG	60.125	21	201	1319	1519
F01_transcript_15868	1	p2	(TA)14	28	28	55	--
F01_transcript_15873	1	p1	(T)12	12	111	122	CCTTTCAGGAGTTGCAGAGG	59.982	20	CTAGAAAATTCGCCGAGTGC	59.982	20	160	75	234	CCTTTCAGGAGTTGCAGAGG	59.982	20	TCCGACTCGCAGTAGATCCT	59.973	20	104	75	178	GTTTCCATGAAGTGGGCAGT	59.973	20	CTAGAAAATTCGCCGAGTGC	59.982	20	196	39	234
F01_transcript_15879	1	p3	(AAG)5	15	303	317	TACCTAATTGCCAGCGGTTC	60.096	20	TTTGCATCTCTTGTTTCGGA	59.395	20	263	203	465	AGCATCAGTACGTGTGGACG	59.776	20	TTTGCATCTCTTGTTTCGGA	59.395	20	192	274	465	TACCTAATTGCCAGCGGTTC	60.096	20	TTGCATCTCTTGTTTCGGAG	58.999	20	262	203	464
F01_transcript_15879	2	p3	(GGC)5	15	744	758	CGCTTTGCGAAGTAATTTGA	59.098	20	CCCTCGAGATCTTGTCTTTGA	59.415	21	266	608	873	TGAAGAGGGTGAGTGCAGAA	59.545	20	TGAATTATTTCCAAACCCTGC	58.932	21	245	541	785	TTGAAGAGGGTGAGTGCAGA	59.545	20	TGAATTATTTCCAAACCCTGC	58.932	21	246	540	785
F01_transcript_15884	1	p1	(T)12	12	1534	1545	CAAACTGCTTGCCTACACGA	60.05	20	TGAAGAGGGAGAGAAGTTTCAGA	59.624	23	171	1453	1623	CAAACTGCTTGCCTACACGA	60.05	20	TGAAGAGGGAGAGAAGTTTCAGAT	59.895	24	171	1453	1623	CAAACTGCTTGCCTACACGA	60.05	20	TGAAGAGGGAGAGAAGTTTCAG	57.791	22	171	1453	1623
F01_transcript_15885	1	p2	(CT)7	14	2	15	--
F01_transcript_15892	1	c	(CT)6ccctc(TG)6	29	1285	1313	CCCGGCTAGCTTGATAAGTG	59.861	20	TATGAAACCCGCAATGTCAA	59.93	20	259	1244	1502	CCGGCTAGCTTGATAAGTGG	59.861	20	TATGAAACCCGCAATGTCAA	59.93	20	258	1245	1502	CGGCTAGCTTGATAAGTGGG	59.861	20	GGGACCTGTGTTTGTGTCCT	59.859	20	117	1246	1362
F01_transcript_15892	2	p1	(A)11	11	1711	1721	--
F01_transcript_15896	1	c	(CT)11(AT)8	38	43	80	TGCGAATAAATAAACTTTAAATCTCCT	59.18	27	TCTGGCTTCTGGGTACTGCT	60.012	20	252	11	262	TGCGAATAAATAAACTTTAAATCTCCT	59.18	27	CCCAATTCTTTCACCTCGAA	60.044	20	206	11	216	TGCGAATAAATAAACTTTAAATCTCCT	59.18	27	CATGCCCAATTCTTTCACCT	59.933	20	210	11	220
F01_transcript_15897	1	c	(AC)9(AT)14	46	199	244	TTCCCATTTTCGCAGATCAT	60.414	20	GCCAGGAATTAGGGTTAGGG	59.793	20	268	61	328	TTCCCATTTTCGCAGATCAT	60.414	20	GGCCAGGAATTAGGGTTAGG	59.793	20	269	61	329	TGACAGAGAGAGATGGCCTG	59.074	20	GCCAGGAATTAGGGTTAGGG	59.793	20	231	98	328
F01_transcript_15902	1	p2	(TA)12	24	222	245	GGCTGTCATTGAGCATCTGT	58.832	20	TGGATGATCAGGAAAGCTCA	59.322	20	277	189	465	CGGCTGTCATTGAGCATCT	59.959	19	TGGTGTTCTCAAACAGGGAA	59.109	20	258	188	445	GGCTGTCATTGAGCATCTGT	58.832	20	TGGTGTTCTCAAACAGGGAA	59.109	20	257	189	445
F01_transcript_15912	1	p4	(CCTG)5	20	52	71	ATCCATTGTTGAGGCCACTC	59.934	20	TTTAACGGCAAAAGGGTGAC	59.975	20	279	7	285	ATCCATTGTTGAGGCCACTC	59.934	20	GACCCGAATTGACGTCCTTA	59.933	20	262	7	268	CCCCTTCTTTTGATCCCATT	60.124	20	TTTAACGGCAAAAGGGTGAC	59.975	20	260	26	285
F01_transcript_15913	1	p2	(TA)14	28	327	354	GAGCTCACAGCAGGTGTTCA	60.187	20	ACAGGAGCGCCGTAGAGTAA	60.037	20	278	229	506	GAGCTCACAGCAGGTGTTCA	60.187	20	AACAGGAGCGCCGTAGAGTA	60.037	20	279	229	507	GAGCTCACAGCAGGTGTTCA	60.187	20	CAGGAGCGCCGTAGAGTAAC	60.037	20	277	229	505
F01_transcript_15917	1	p2	(TA)8	16	95	110	CCCTTCTTCCTCTGGCTCTT	59.95	20	CATCTCTCACTCCCCTGCTC	59.945	20	181	2	182	CCCTTCTTCCTCTGGCTCTT	59.95	20	CGGATCAGAACTTCCTTTGG	59.665	20	214	2	215	CCCTTCTTCCTCTGGCTCTT	59.95	20	TGCTTCGGATCAGAACTTCC	60.34	20	219	2	220
F01_transcript_15922	1	c	(TC)7taggattgatataatccaaatgatcctgaaagcctcaaacttttgcttactcattacttcccctgcatatatgcacgcatacttgtaattt(TA)11	127	14	140	--
F01_transcript_15938	1	p1	(C)10	10	1582	1591	CGAAATTGGATTACGAGGGA	59.894	20	ATCACCGCAAACTACGGATT	59.457	20	161	1470	1630	CGAAATTGGATTACGAGGGA	59.894	20	AATCACCGCAAACTACGGAT	59.457	20	162	1470	1631	ATGGCGGGGTTCTTTATCTT	59.799	20	ATCACCGCAAACTACGGATT	59.457	20	265	1366	1630
F01_transcript_15968	1	p2	(AG)8	16	26	41	--
F01_transcript_15985	1	p2	(TC)7	14	76	89	CTAATAAGATCGACGCCCCA	60.053	20	GGTGAGCTCATTGCTGTCAA	59.992	20	126	22	147	TAATAAGATCGACGCCCCAG	60.053	20	GGTGAGCTCATTGCTGTCAA	59.992	20	125	23	147	CTAATAAGATCGACGCCCCA	60.053	20	GCGACTTCATCTTCCTCGTC	59.957	20	255	22	276
F01_transcript_15991	1	p2	(AT)10	20	1684	1703	--
F01_transcript_15992	1	p1	(C)16	16	1709	1724	--
F01_transcript_15997	1	p3	(GAT)7	21	641	661	CCAAATTCGACACCCTGAAG	60.486	20	ATGTCAAAGAACCATCCCCA	60.173	20	270	482	751	CTTCCAAATTCGACACCCTG	60.486	20	ATGTCAAAGAACCATCCCCA	60.173	20	273	479	751	GGCTTCTCAGAATATGGCGT	59.297	20	ATTGCATACATTTCCTCCGC	59.929	20	272	607	878
F01_transcript_15998	1	p3	(AGT)5	15	7	21	--
F01_transcript_15998	2	p2	(AG)6	12	282	293	GGTTGGATCAAAATTGAGGG	59.22	20	TGCAATAGCAAGTGTTTCCG	59.872	20	198	238	435	GGTTGGATCAAAATTGAGGG	59.22	20	GAGACCAAAATAACGCTCGC	59.851	20	170	238	407	GGTTGGATCAAAATTGAGGG	59.22	20	AGCTGCTCACGAAATGGAAC	60.406	20	247	238	484
F01_transcript_15999	1	p2	(AG)6	12	168	179	TGGCCTAATTTGGTGAGGAG	60.066	20	GCTGCTGTTGTGGAGTCAAA	60.032	20	125	136	260	TGGCCTAATTTGGTGAGGAG	60.066	20	CCACTGTTGCTGTTGTTGCT	59.946	20	142	136	277	TGGCCTAATTTGGTGAGGAG	60.066	20	GCTGTTGTTGCTGCTGTTGT	60.104	20	134	136	269
F01_transcript_15999	2	p3	(GCG)6	18	336	353	TTTGACTCCACAACAGCAGC	60.032	20	CCGATCCAGATCGTTTTGTT	59.933	20	276	241	516	AGCAACAACAGCAACAGTGG	59.946	20	CCGATCCAGATCGTTTTGTT	59.933	20	259	258	516	GCAGCAACAACAGCAACAGT	60.104	20	CCGATCCAGATCGTTTTGTT	59.933	20	261	256	516
F01_transcript_16007	1	p3	(GTG)5	15	1539	1553	ATGAAGGAGTTGCTGCTGGT	59.874	20	TCCCCTTATTGCGAACAAAA	60.427	20	265	1323	1587	ATGAAGGAGTTGCTGCTGGT	59.874	20	TTCCCCTTATTGCGAACAAA	60.427	20	266	1323	1588	ATGAAGGAGTTGCTGCTGGT	59.874	20	ATTGCGAACAAAACCAAGGA	60.481	20	258	1323	1580
F01_transcript_16019	1	p2	(AT)13	26	131	156	AGGAAGCGTACTCCTCGTGA	60.012	20	CTCTCTCTCCCTCCATGACG	59.937	20	227	82	308	AGGAAGCGTACTCCTCGTGA	60.012	20	ACCCTCCTTCCCAATTCATC	60.133	20	150	82	231	AGGAAGCGTACTCCTCGTGA	60.012	20	GACCCTCCTTCCCAATTCAT	60.133	20	151	82	232
F01_transcript_16053	1	p3	(GCA)6	18	1393	1410	ATATGCGCAGGTTCATACCC	59.813	20	GAGGTGCCTTAACCATCACC	59.41	20	173	1311	1483	CGTCCAACAACAACAGCAAC	60.199	20	GAGGTGCCTTAACCATCACC	59.41	20	266	1218	1483	CAGGTTCATACCCAGGTTGG	60.224	20	GAGGTGCCTTAACCATCACC	59.41	20	166	1318	1483
F01_transcript_16066	1	p1	(A)23	23	1703	1725	--
F01_transcript_16085	1	p1	(T)13	13	1520	1532	GGTGGAGGATATGATGGTGG	60.011	20	TTCTGTCCGAATTAGAGCCTG	59.462	21	265	1325	1589	TATGGGAATGGAGGTGCTTC	59.894	20	TTCTGTCCGAATTAGAGCCTG	59.462	21	238	1352	1589	ACGGGTGTAACCTTCAGCAG	60.171	20	TTCTGTCCGAATTAGAGCCTG	59.462	21	151	1439	1589
F01_transcript_16090	1	p1	(T)10	10	1379	1388	CCCGAGACAAGTTTGCAGAT	60.255	20	AAGTGAAGCAGCAGCATTTG	59.224	20	264	1341	1604	CCCGAGACAAGTTTGCAGAT	60.255	20	AAGCAGCAGCATTTGCATTT	60.916	20	259	1341	1599	GCTTGACCCGAGACAAGTTT	59.333	20	AAGTGAAGCAGCAGCATTTG	59.224	20	270	1335	1604
F01_transcript_16099	1	p2	(GA)6	12	25	36	GGAGCTTTCCAATTGAAATAAA	57.47	22	ATTACCCGGAAGATCCCAAG	60.145	20	231	0	230	GGAGCTTTCCAATTGAAATAAA	57.47	22	CCGGCATAAATAGTGCATCA	59.543	20	147	0	146	GGAGCTTTCCAATTGAAATAAA	57.47	22	AATTACCCGGAAGATCCCAA	60.502	20	232	0	231
F01_transcript_16099	2	p3	(GCA)7	21	1324	1344	CACGGCGTACCTCGATACTT	60.154	20	CATGAACATATCCTGCCACG	59.948	20	274	1110	1383	AAATTTGATGTTCGGTTCGC	59.945	20	CGTGCACACTCATCAACCTT	59.751	20	211	1287	1497	ACACGGCGTACCTCGATACT	59.644	20	CATGAACATATCCTGCCACG	59.948	20	275	1109	1383
F01_transcript_16119	1	p2	(CT)7	14	139	152	TGCCGCTCGTTATTTCTTCT	59.982	20	AAGGCTTGCAACCCCTAGAT	60.096	20	180	45	224	CCATCGTGCTCTCTCTCCTC	60.096	20	AAGGCTTGCAACCCCTAGAT	60.096	20	122	103	224	TGCCGCTCGTTATTTCTTCT	59.982	20	TAGGGAATCGAGTTTGACGC	60.214	20	251	45	295
F01_transcript_16122	1	p2	(TC)7	14	31	44	CACAATGTGTGTACCGTCTTCT	57.664	22	TTTTGAAGGGGTTGATTTGG	59.772	20	231	6	236	CACAATGTGTGTACCGTCTTCT	57.664	22	CGGTTCCCATGGAGATGATA	60.681	20	166	6	171	CACAATGTGTGTACCGTCTTCT	57.664	22	TGAAGGGGTTGATTTGGCT	60.445	19	228	6	233
F01_transcript_16126	1	p3	(GAG)5	15	1420	1434	ATAGCTCTTGGGCACCCTTT	60.096	20	GTTGGTTCCATCATTGCACA	60.376	20	207	1271	1477	AATAGCTCTTGGGCACCCTT	60.096	20	GTTGGTTCCATCATTGCACA	60.376	20	208	1270	1477	ATAGCTCTTGGGCACCCTTT	60.096	20	TGGTTCCATCATTGCACAAG	60.517	20	205	1271	1475
F01_transcript_16127	1	c	(AT)11gtgtgta(TG)11	51	10	60	--
F01_transcript_16147	1	p2	(AG)13	26	45	70	GCATCTAAACTCTGTGGGTTTG	58.767	22	CATGGATGTCACTCCACCAG	59.954	20	242	3	244	GCATCTAAACTCTGTGGGTTTG	58.767	22	TGGATGTCACTCCACCAGAA	60.088	20	240	3	242	AGCATCTAAACTCTGTGGGTTTG	59.703	23	CATGGATGTCACTCCACCAG	59.954	20	243	2	244
F01_transcript_16148	1	p2	(TC)6	12	23	34	GATCCGAAGAACACACCTCA	58.643	20	TTCACCACAACTGCCATGAT	59.967	20	223	0	222	GATCCGAAGAACACACCTCA	58.643	20	ATTCACCACAACTGCCATGA	59.967	20	224	0	223	GATCCGAAGAACACACCTCA	58.643	20	GTAACGTCAACCCCAGCATT	59.859	20	241	0	240
F01_transcript_16148	2	p3	(CAG)6	18	375	392	CATTTGAGCAGCAACGGTAA	59.872	20	CTCCTGCTTAAAACCCTCCC	60.068	20	273	302	574	CATTTGAGCAGCAACGGTAA	59.872	20	CTCTCCTTACATCCACCCCA	59.92	20	229	302	530	ATCATGGCAGTTGTGGTGAA	59.967	20	CAGCAGCAGCACCGTTACTA	60.217	20	235	203	437
F01_transcript_16149	1	c	(TA)12a(AT)10	45	623	667	GCTTATTTTTGCAAGGCCAA	60.205	20	CCATTCATCATTTTCAGAGAACC	59.828	23	205	599	803	GCTTATTTTTGCAAGGCCAA	60.205	20	CATTCATCATTTTCAGAGAACCA	59.077	23	204	599	802	GCTTATTTTTGCAAGGCCAA	60.205	20	TCATCATTTTCAGAGAACCATCAT	59.841	24	201	599	799
F01_transcript_16153	1	p3	(GCT)6	18	564	581	TTGAGGCTGTAGAACGGGAG	60.388	20	GAACTGTCGACGAGCATGAG	59.577	20	248	411	658	CTTGAGGCTGTAGAACGGGA	60.388	20	GAACTGTCGACGAGCATGAG	59.577	20	249	410	658	TTGAGGCTGTAGAACGGGAG	60.388	20	AGAACTGTCGACGAGCATGA	59.577	20	249	411	659
F01_transcript_16164	1	c	(TA)8(GA)16	48	6	53	--
F01_transcript_16164	2	p1	(T)10	10	1472	1481	GGTTCTTCTGCTTCTGTGGC	59.997	20	GGGGGAGGGGTGTTTACTTA	60.046	20	243	1315	1557	CGAGGCATTTTGGAGATGAT	60.036	20	GGGGGAGGGGTGTTTACTTA	60.046	20	137	1421	1557	GGAACCACTTGGCCTATTCA	59.933	20	GGGGGAGGGGTGTTTACTTA	60.046	20	194	1364	1557
F01_transcript_16168	1	c	(CTC)13cttaatcataatttctctgtctaaatatgtattatatac(AT)7	92	13	104	--
F01_transcript_16168	2	p3	(TAT)5	15	1680	1694	--
F01_transcript_16169	1	p3	(TAT)12	36	90	125	CTCCTCGCTGAGAAAATCCA	60.474	20	CCCAAAATGGATCAAACAGG	60.162	20	217	8	224	TCTCCTCGCTGAGAAAATCC	59.508	20	CCCAAAATGGATCAAACAGG	60.162	20	218	7	224	CCTCGCTGAGAAAATCCAAT	59.269	20	CCCAAAATGGATCAAACAGG	60.162	20	215	10	224
F01_transcript_16189	1	p6	(AGAGGG)6	36	1	36	--
F01_transcript_16195	1	p6	(TACCAT)6	36	983	1018	TATCCCCATTCAGTCCTCCA	60.272	20	GGCTTAGCTCATGTAAAACCG	58.912	21	273	773	1045	ATCCCCATTCAGTCCTCCAT	60.541	20	GGCTTAGCTCATGTAAAACCG	58.912	21	272	774	1045	TATCCCCATTCAGTCCTCCA	60.272	20	GGCTTAGCTCATGTAAAACCGA	60.614	22	273	773	1045
F01_transcript_16198	1	p2	(TA)27	54	120	173	CGGCTGTCATCATTCTCAAG	59.394	20	GCCCTACTCTCTTTGTGCTGA	59.63	21	268	74	341	CGGCTGTCATCATTCTCAAG	59.394	20	GCAAGCCCTACTCTCTTTGTG	59.135	21	272	74	345	CGGCTGTCATCATTCTCAAG	59.394	20	CAAGCCCTACTCTCTTTGTGC	59.135	21	271	74	344
F01_transcript_16200	1	p3	(CAG)5	15	1333	1347	GTGGGAGGTCATCATCCAAT	59.593	20	TATGCGCAGGTAAACAATGC	59.731	20	280	1229	1508	AGACGTGGGAGGTCATCATC	59.928	20	CGCAGGTAAACAATGCAGTC	59.347	20	280	1225	1504	AGACGTGGGAGGTCATCATC	59.928	20	AAACTAAGGCTTTCGAGGCG	60.858	20	147	1225	1371
F01_transcript_16202	1	p2	(TA)7	14	1559	1572	CCTTCAAAAATGTGGAGGGA	59.903	20	TCATTTGACCATTCCCCTTC	59.727	20	249	1466	1714	CAAGACATACACGCCCTTCA	59.716	20	CATTCCCCTTCCCTCGTAAT	60.145	20	254	1452	1705	CCTTCAAAAATGTGGAGGGA	59.903	20	CATCATTTGACCATTCCCCT	59.605	20	251	1466	1716
F01_transcript_16217	1	p1	(T)12	12	52	63	CTACTCTCGATTTTTGTCGGC	58.986	21	CATCAATGCTTGTTGCTGCT	60.019	20	221	14	234	TACTCTCGATTTTTGTCGGC	57.971	20	CATCAATGCTTGTTGCTGCT	60.019	20	220	15	234	CTACTCTCGATTTTTGTCGGC	58.986	21	CTATCTGGGGAGGGGCTAAG	60.046	20	267	14	280
F01_transcript_16218	1	c	(AT)6(AG)7	26	170	195	CAGTCAATGGAATAGGATACCCA	60.082	23	CCTCTTGACGGGAAAATCAA	60.044	20	254	103	356	TCTCTCTGTGTCAGTCAATGGAA	59.899	23	CCTCTTGACGGGAAAATCAA	60.044	20	265	92	356	CAGTCAATGGAATAGGATACCCA	60.082	23	CGGCTGAAGAGAGAGACCAC	60.135	20	121	103	223
F01_transcript_16230	1	p1	(G)10	10	9	18	--
F01_transcript_16230	2	p3	(AAG)8	24	298	321	TTGATCATAAACCGCCTTCC	59.901	20	ACCCAAATTTTTGGATGGTT	58.136	20	259	102	360	GCCTTCCCACAACTACTGCT	59.357	20	ACCCAAATTTTTGGATGGTT	58.136	20	246	115	360	TCCCAACTATATGCCCAATTTT	59.588	22	CAAAGATCAATCTTCCCCCA	59.864	20	275	200	474
F01_transcript_16233	1	p3	(TCT)6	18	63	80	CATGCTGTCGGTTGGATATG	59.948	20	ATTTCAGGCAAAGGTGGTTG	59.971	20	193	3	195	CATGCTGTCGGTTGGATATG	59.948	20	ATCGTGGAGTTGCCATTTTC	59.939	20	146	3	148	CATGCTGTCGGTTGGATATG	59.948	20	GAATCGTGGAGTTGCCATTT	59.939	20	148	3	150
F01_transcript_16234	1	p2	(AG)13	26	48	73	GAAGTGTCGAGGTGTTACCAG	57.307	21	TGAATTTCCGACCTGGATTC	59.871	20	177	0	176	GAAGTGTCGAGGTGTTACCAG	57.307	21	CATGAATTTCCGACCTGGAT	59.75	20	179	0	178	GAAGTGTCGAGGTGTTACCAG	57.307	21	CGCAACACCCACTGTATTGT	59.49	20	255	0	254
F01_transcript_16245	1	p5	(CTCCC)6	30	1595	1624	GCTGCCATCTATCTGGTGGT	60.104	20	GGATTAGATTTCAATTTCCGGT	58.391	22	242	1450	1691	TTCTCTCTCGGGGAAAACCT	60.183	20	GGATTAGATTTCAATTTCCGGT	58.391	22	124	1568	1691	TGCAGTACACCTTGTCGGAA	60.301	20	GGATTAGATTTCAATTTCCGGT	58.391	22	270	1422	1691
F01_transcript_16257	1	p6	(CATCCC)5	30	134	163	GACGCATCACACCACAAATC	59.975	20	CACCACCAGCTCATTGTTTG	60.152	20	182	22	203	ATCTCCCATCTCCCATCTCC	60.242	20	CACCACCAGCTCATTGTTTG	60.152	20	103	101	203	ATCTCCCATCTCCCATCTCC	60.242	20	CACCACCAGCTCATTGTTTG	60.152	20	110	94	203
F01_transcript_16258	1	p3	(TTA)5	15	1250	1264	CGGATTCCCTTTGTCCAGTA	59.926	20	CCCGTAAGCCATCATTTCAT	59.784	20	274	1036	1309	TACAAGGTTGGAGGTGGAGC	60.111	20	CCCGTAAGCCATCATTTCAT	59.784	20	226	1084	1309	TTCCTTGTCATTGCAGTCCA	60.24	20	CCCGTAAGCCATCATTTCAT	59.784	20	206	1104	1309
F01_transcript_16258	2	p3	(TTA)5	15	1415	1429	ATGAAATGATGGCTTACGGG	59.784	20	ACCTGATTAGAAACGTGCGG	60.132	20	167	1290	1456	ATGAAATGATGGCTTACGGG	59.784	20	CCTGATTAGAAACGTGCGGT	60.132	20	166	1290	1455	GCGATGTCGTTAGTTGTGGA	59.722	20	AACCCATTTCATCAAGTGCC	59.797	20	232	1373	1604
F01_transcript_16270	1	p1	(A)13	13	199	211	ACCTCTTTCTCCACTTGCCA	59.844	20	CACTCAAGCAAATCCCCATT	59.933	20	269	37	305	CTTGCCAAAATCTTTTCCCC	60.773	20	CACTCAAGCAAATCCCCATT	59.933	20	256	50	305	ACCTCTTTCTCCACTTGCCA	59.844	20	CAAGCAAATCCCCATTTGAA	60.807	20	265	37	301
F01_transcript_16270	2	p1	(A)11	11	1658	1668	AAACTGTCGTCGCATATCCC	59.962	20	CTCGACAAACCTTTCGGGTA	60.103	20	243	1461	1703	TATCCCAGGCCATCTGATTC	59.854	20	CTCGACAAACCTTTCGGGTA	60.103	20	229	1475	1703	AAACTGTCGTCGCATATCCC	59.962	20	TCGACAAACCTTTCGGGTAA	60.472	20	242	1461	1702
F01_transcript_16302	1	p3	(GTA)5	15	1467	1481	TTTGGGACATTTCCCCTTTT	60.514	20	ATTCGTGGCAAGTTCAGTCC	60.119	20	168	1419	1586	TTTTGGGACATTTCCCCTTT	60.514	20	ATTCGTGGCAAGTTCAGTCC	60.119	20	169	1418	1586	TTTTTGGGACATTTCCCCTT	60.514	20	ATTCGTGGCAAGTTCAGTCC	60.119	20	170	1417	1586
F01_transcript_16323	1	p6	(GGTTCA)7	42	629	670	TTTACAGTGGTGCGAATGGA	60.111	20	CGCCTCTTTTTCTCAGGTTG	59.986	20	262	542	803	TTTACAGTGGTGCGAATGGA	60.111	20	AAGGACAACCGGTCTGAATG	59.966	20	187	542	728	TTTACAGTGGTGCGAATGGA	60.111	20	GAAAGGACAACCGGTCTGAA	60.088	20	189	542	730
F01_transcript_16326	1	p3	(AGC)10	30	64	93	AACATCAGCAGCAACAGCAG	60.207	20	TCCCATTTGAGTCCGAAAAG	60.044	20	272	23	294	AACATCAGCAGCAACAGCAG	60.207	20	GAGAGGGGACAACACCTGAA	60.088	20	184	23	206	AACATCAGCAGCAACAGCAG	60.207	20	GATTCCCATTTGAGTCCGAA	59.871	20	275	23	297
F01_transcript_16329	1	p1	(A)10	10	140	149	TTAGCTGTTTGGCTTTGGCT	60.018	20	CTGTTTGGGTTCACCGTTCT	60.005	20	270	26	295	TTAGCTGTTTGGCTTTGGCT	60.018	20	CAATGGTCGTCGAAATGATG	59.924	20	244	26	269	TTAGCTGTTTGGCTTTGGCT	60.018	20	CGTCGAAATGATGTGACCAG	60.112	20	237	26	262
F01_transcript_16329	2	p1	(T)10	10	1493	1502	GCCAAGTGGGTCAACAGTTT	60.012	20	TGTCGGGAGAGAGGAATGTC	60.199	20	236	1291	1526	GCCAAGTGGGTCAACAGTTT	60.012	20	GTCGGGAGAGAGGAATGTCA	60.199	20	235	1291	1525	CATCCTTCGAGGAGTTCAGC	59.95	20	TGTCGGGAGAGAGGAATGTC	60.199	20	192	1335	1526
F01_transcript_16344	1	p2	(GA)7	14	33	46	ACATCATCCTTGACGACGTG	59.551	20	ATAAGCAGCGGAAAGAAGCA	60.117	20	168	10	177	ACATCATCCTTGACGACGTG	59.551	20	AGGGGAGGGAATCGAATAGA	59.859	20	188	10	197	ACATCATCCTTGACGACGTG	59.551	20	GGGGAGGGAATCGAATAGAA	60.224	20	187	10	196
F01_transcript_16355	1	c	(TA)7aaaaa(AT)8	35	64	98	TGGTTTAATTCTTCAACCTTATCA	57.024	24	TCGATAATCGCTGGCTTCTT	59.945	20	151	26	176	TGGTTTAATTCTTCAACCTTATCA	57.024	24	TTCGATAATCGCTGGCTTCT	59.945	20	152	26	177	TGGTTTAATTCTTCAACCTTATCA	57.024	24	ATGTTTCGATAATCGCTGGC	60.067	20	156	26	181
F01_transcript_16365	1	c	(CGCCAC)5cgccaagtatcatctctcta(T)14	64	53	116	TCGCACCTCTTAAGAATCTTCC	59.856	22	GAAATTGCAACCATTTCGCT	60.081	20	158	27	184	TCGCACCTCTTAAGAATCTTCC	59.856	22	AACCATTTCGCTGAGATTCG	60.214	20	150	27	176	TCGCACCTCTTAAGAATCTTCC	59.856	22	GCAACCATTTCGCTGAGATT	60.221	20	152	27	178
F01_transcript_16386	1	p6	(CACCTC)8	48	296	343	AAGTCCCCCTCCTCAAAGAA	60.045	20	TTCACATTCCTGGTGAGCTG	59.831	20	192	242	433	CGCTCCAAATCCTTCACTTC	59.813	20	TTTCCTTGGAGGTGGAGTTG	60.081	20	192	183	374	AAGTCCCCCTCCTCAAAGAA	60.045	20	TTGGAGGTGGAGTTGCTTTC	60.232	20	128	242	369
F01_transcript_16386	2	p5	(ATAGC)5	25	1393	1417	GCTTTGCAGCTAGGATTTGC	60.124	20	AACCAATTCCAACAATGGGA	60.029	20	252	1337	1588	GCTTTGCAGCTAGGATTTGC	60.124	20	TCACTCTTCCACCCACACAA	60.129	20	231	1337	1567	GCAGTAGTTCACCTCCTCGG	59.867	20	TCACTCTTCCACCCACACAA	60.129	20	280	1288	1567
F01_transcript_16388	1	p3	(AGA)6	18	35	52	GGAAGAAGAGAAGAAGAGGAGGA	59.608	23	CGGAACTTTCACTCCGGATA	60.066	20	174	4	177	GGAAGAAGAGAAGAAGAGGAGGA	59.608	23	GATACGGCTGAACGAAGGAA	60.214	20	158	4	161	GGAAGAAGAGAAGAAGAGGAGGA	59.608	23	GCTGCAACTTGGGCTATCAT	60.243	20	109	4	112
F01_transcript_16395	1	p2	(GA)6	12	94	105	CCCTATCGGATAACAGAACTCC	58.981	22	GGCCTAGGGTTCTTCTCGTC	60.212	20	146	42	187	CCCTATCGGATAACAGAACTCC	58.981	22	GAGGCCTAGGGTTCTTCTCG	60.34	20	148	42	189	CCCTATCGGATAACAGAACTCCT	59.874	23	GAGGCCTAGGGTTCTTCTCG	60.34	20	148	42	189
F01_transcript_16401	1	p3	(AAC)5	15	191	205	ACCCACCCCCATAAGATTTC	59.881	20	AGAGCTAACCTCCCCACCAT	59.957	20	277	9	285	ACCCACCCCCATAAGATTTC	59.881	20	AGGAGAGCTAACCTCCCCAC	59.699	20	280	9	288	GACAGACAACCCACAATCCA	59.367	20	AGAGCTAACCTCCCCACCAT	59.957	20	207	79	285
F01_transcript_16403	1	p3	(CTC)5	15	464	478	GCACCTCCTCCTCCTACACA	60.261	20	CCACCCATGAGTAGTTGGCT	59.989	20	170	417	586	TGCACCTCCTCCTCCTACAC	60.261	20	CCACCCATGAGTAGTTGGCT	59.989	20	171	416	586	CTGCACCTCCTCCTCCTACA	60.399	20	CCACCCATGAGTAGTTGGCT	59.989	20	172	415	586
F01_transcript_16407	1	p3	(AGA)5	15	874	888	GGTCGAGGGTAAGGAGAAAGA	59.699	21	GCCCTTCTTTCCCTCTGTTT	59.691	20	277	808	1084	GAAGGTCGAGGGTAAGGAGAA	59.699	21	GCCCTTCTTTCCCTCTGTTT	59.691	20	280	805	1084	AAGGTCGAGGGTAAGGAGAAA	59.223	21	GCCCTTCTTTCCCTCTGTTT	59.691	20	279	806	1084
F01_transcript_16414	1	p2	(TC)6	12	41	52	CTTGCGACTCAGCCAAAAAC	60.944	20	CGGAGTTGATTCTTGTCGGT	60.111	20	198	2	199	ACTTGCGACTCAGCCAAAAA	60.944	20	CGGAGTTGATTCTTGTCGGT	60.111	20	199	1	199	CTTGCGACTCAGCCAAAAAC	60.944	20	CTTGGTGTGAATCGACGAGA	59.831	20	222	2	223
F01_transcript_16416	1	p3	(CTT)10	30	142	171	TTGTTGGTGGTGCTGTGTTT	60.049	20	GAGCTCTGCAACTTATCGCC	60.125	20	132	87	218	TAGATCCCAACTGCCAGACC	60.073	20	GAGCTCTGCAACTTATCGCC	60.125	20	215	4	218	TTGTTGGTGGTGCTGTGTTT	60.049	20	GATGATCAATTGCTGCCTGA	59.763	20	216	87	302
F01_transcript_16418	1	p1	(T)11	11	1420	1430	AAGCTCTAGCACAAGCCAGG	59.78	20	AGATCACCTCCCGACCTGTA	59.53	20	248	1300	1547	CCCTTTGTCCGGAAGAAAAT	60.291	20	AGATCACCTCCCGACCTGTA	59.53	20	156	1392	1547	AAGCTCTAGCACAAGCCAGG	59.78	20	AGAGAGATCACCTCCCGACC	60.615	20	252	1300	1551
F01_transcript_16423	1	p1	(T)10	10	208	217	GCAATCTTCCACTCCATTCC	59.488	20	ACTTCTTCCCCCTCTGAACC	59.534	20	265	80	344	GGCAATCTTCCACTCCATTC	59.488	20	ACTTCTTCCCCCTCTGAACC	59.534	20	266	79	344	CCACTCCATTCCTCTCCCTC	60.991	20	ACTTCTTCCCCCTCTGAACC	59.534	20	257	88	344
F01_transcript_16423	2	p3	(ATC)5	15	527	541	CTGTGCTGCTATTTGGGGTT	60.132	20	AGATGGACATCAAAGCACCC	59.934	20	263	417	679	TGTGCTGCTATTTGGGGTTT	60.502	20	AGATGGACATCAAAGCACCC	59.934	20	262	418	679	CTGTGCTGCTATTTGGGGTT	60.132	20	CAGATGGACATCAAAGCACC	59.09	20	264	417	680
F01_transcript_16423	3	p3	(AAC)5	15	1220	1234	CTCAATGTGCACCAGCAACT	59.905	20	CGATGACCCGTCTTTGAAAT	59.933	20	122	1172	1293	ACTTGCTCAATGTGCACCAG	59.905	20	CGATGACCCGTCTTTGAAAT	59.933	20	127	1167	1293	CTCAATGTGCACCAGCAACT	59.905	20	TTTGAAATCCGGGAAGAATG	59.872	20	110	1172	1281
F01_transcript_16438	1	p2	(AT)12	24	47	70	GATGTCCAACCCCTCATTTT	58.691	20	CCAGGAACCTCTTCACAAGC	59.844	20	234	0	233	GATGTCCAACCCCTCATTTT	58.691	20	GGGTTTTCTTTCCAGGAACC	59.783	20	245	0	244	TGTCCAACCCCTCATTTTAATC	60.055	22	CCAGGAACCTCTTCACAAGC	59.844	20	232	2	233
F01_transcript_16455	1	p3	(CGG)5	15	1327	1341	AGCAGTTTCAATGGTGGTCC	59.973	20	CTGCTACTCTGCTGCTGGTG	59.946	20	236	1141	1376	TCCGGTTTGTTCACTTAGGG	59.964	20	CTGCTACTCTGCTGCTGGTG	59.946	20	147	1230	1376	TCAATGTTCCGGTTTGTTCA	59.941	20	CTGCTACTCTGCTGCTGGTG	59.946	20	154	1223	1376
F01_transcript_16460	1	c	(AG)6ggaggagttggttaatttctgttagttggagactgggagtagtagtaaa(TAC)5	76	16	91	--
F01_transcript_16462	1	p1	(T)14	14	1671	1684	--
F01_transcript_16466	1	p1	(A)13	13	1422	1434	AACGGATCTGTGAAGGTTGC	60.119	20	CCACAATGTATCATCCGCAG	59.948	20	176	1328	1503	AACGGATCTGTGAAGGTTGC	60.119	20	CACAATGTATCATCCGCAGC	60.104	20	175	1328	1502	AGGACCATCATGTGACACCA	59.801	20	CCACAATGTATCATCCGCAG	59.948	20	140	1364	1503
F01_transcript_16469	1	p3	(GAA)5	15	1370	1384	TGCCATGTTTAGGAGGAAGG	60.066	20	GACCAAGGTATCTGAATCGCA	60.088	21	224	1212	1435	TGCCATGTTTAGGAGGAAGG	60.066	20	TCAAGTTCACATCAGCTCCC	58.802	20	196	1212	1407	GAGATGGAGTTCACGGAAGC	59.81	20	GACCAAGGTATCTGAATCGCA	60.088	21	169	1267	1435
F01_transcript_16481	1	p2	(CT)6	12	1062	1073	AGCAGAGTTGCTGGAAGCAT	60.164	20	AAGGAGCCAAAAGGAGAAGG	59.821	20	277	967	1243	AGCAGAGTTGCTGGAAGCAT	60.164	20	GGAGCCAAAAGGAGAAGGTC	60.19	20	275	967	1241	AGCAGAGTTGCTGGAAGCAT	60.164	20	CCAATTAGGGCTGGGTATGA	59.778	20	204	967	1170
F01_transcript_16509	1	p2	(TC)12	24	27	50	ATCGCCATAAACAACACGCT	60.531	20	CCCTTCCACCTCCCATTATT	60.011	20	163	1	163	ATCGCCATAAACAACACGCT	60.531	20	AGCTCTTTGCAGGCTAATGC	59.758	20	242	1	242	ATCGCCATAAACAACACGCT	60.531	20	TCTTTGCAGGCTAATGCGTA	59.608	20	239	1	239
F01_transcript_16509	2	p2	(AT)13	26	1221	1246	TCTTCTCTCTCACCTTCGCC	59.679	20	CTGGCAAAATGTGGCAAATA	59.562	20	126	1193	1318	TCTTCTCTCTCACCTTCGCC	59.679	20	GTGCGAGTACCTCAGCACCT	60.476	20	228	1193	1420	TCTTCTCTCTCACCTTCGCC	59.679	20	GCGAGTACCTCAGCACCTTT	59.501	20	226	1193	1418
F01_transcript_16524	1	c	(AT)6gtatg(TA)6	29	27	55	ATCTTTCCGCTGTCATCACC	60.081	20	GCTTCTCTGACCCATGCTCT	59.56	20	196	4	199	ATCTTTCCGCTGTCATCACC	60.081	20	TCTCTGACCCATGCTCTGAA	59.499	20	193	4	196	ATCTTTCCGCTGTCATCACC	60.081	20	GCGTCACGAGGTGGACTAAC	60.721	20	168	4	171
F01_transcript_16529	1	p2	(AT)18	36	209	244	TGCGTCTTTCCTAAGCAGGT	60.015	20	GCCCCAAATTACAAAACCCT	60.055	20	224	68	291	TGCGTCTTTCCTAAGCAGGT	60.015	20	ATTATGCGCCCCAAATTACA	60.172	20	231	68	298	TGCGTCTTTCCTAAGCAGGT	60.015	20	ATTGTATTATGCGCCCCAAA	60.172	20	236	68	303
F01_transcript_16554	1	p1	(A)10	10	824	833	GGTTGGTTTTCGGGTGAGTA	59.83	20	ACGACACCGCTCTGTTTTTC	60.299	20	207	789	995	TAATGAGGTTGGTTTTCGGG	59.795	20	ACGACACCGCTCTGTTTTTC	60.299	20	213	783	995	TAATGAGGTTGGTTTTCGGG	59.795	20	TCACACCATACGGATACCCA	59.648	20	255	783	1037
F01_transcript_16560	1	p2	(AG)7	14	54	67	CCTCCATTCTTCACTTGTGC	58.287	20	TCATCGTCGAAATTCTTCCC	60.014	20	164	3	166	CCTCCATTCTTCACTTGTGC	58.287	20	GCCATCATCGTCGAAATTCT	60.043	20	168	3	170	CCTCCATTCTTCACTTGTGC	58.287	20	CTGCCTCCTTTCTGCAAATC	59.955	20	110	3	112
F01_transcript_16560	2	p2	(TA)7	14	1606	1619	TACATGGGTGTGGCTGAAAA	59.964	20	GAAGTCAATTTCTAAGAGATGTGTTG	57.704	26	255	1406	1660	TTACATGGGTGTGGCTGAAA	59.964	20	GAAGTCAATTTCTAAGAGATGTGTTG	57.704	26	256	1405	1660	TTTACATGGGTGTGGCTGAA	59.964	20	GAAGTCAATTTCTAAGAGATGTGTTG	57.704	26	257	1404	1660
F01_transcript_16575	1	p1	(T)16	16	1627	1642	--
F01_transcript_16578	1	p3	(GAG)7	21	1424	1444	GCTGTGGAAGGAACCAGAAG	59.844	20	TTACATAGAAGCACATGCCGA	59.339	21	191	1278	1468	AGCTGTGGAAGGAACCAGAA	59.844	20	TTACATAGAAGCACATGCCGA	59.339	21	192	1277	1468	TGTCAGATTGCTAGGGAGCC	60.362	20	TTACATAGAAGCACATGCCGA	59.339	21	220	1249	1468
F01_transcript_16579	1	p2	(TC)7	14	81	94	AATTGGAAAATCCCGGTTTG	60.883	20	AGCTCCTCGTCTGTCGGATA	59.973	20	168	24	191	AATTGGAAAATCCCGGTTTG	60.883	20	CCAGAAGCTCCTCGTCTGTC	60.135	20	173	24	196	AATTGGAAAATCCCGGTTTG	60.883	20	AGGCAGGCTTAGCTGTGAAA	60.154	20	133	24	156
F01_transcript_16587	1	p3	(ATT)6	18	1365	1382	TTCATGAAGGATTTCCAGGC	60.014	20	AATCTCTGCCATTGAAGAACTC	57.548	22	244	1302	1545	GTTGATCGCATTTCCGTTTT	59.945	20	AATCTCTGCCATTGAAGAACTC	57.548	22	216	1330	1545	GATCGCATTTCCGTTTTGAT	59.907	20	AATCTCTGCCATTGAAGAACTC	57.548	22	213	1333	1545
F01_transcript_16603	1	p1	(T)10	10	1511	1520	CATCTGCTGAATTCCACCCT	60.073	20	TGAAAATTTCCAAGTGCCAA	59.133	20	245	1331	1575	CATCTGCTGAATTCCACCCT	60.073	20	GAAAATTTCCAAGTGCCAACA	59.967	21	244	1331	1574	CATCTGCTGAATTCCACCCT	60.073	20	TGAAAATTTCCAAGTGCCAAC	59.967	21	245	1331	1575
F01_transcript_16606	1	p2	(TG)18	36	1222	1257	TGGAGGACTTGGGAAACAAG	60.081	20	GAAATGCCAGGGATCTGTGT	59.934	20	202	1108	1309	CGGCTAGCTTGATAAGTGGG	59.861	20	GAAATGCCAGGGATCTGTGT	59.934	20	134	1176	1309	CCCGGCTAGCTTGATAAGTG	59.861	20	GAAATGCCAGGGATCTGTGT	59.934	20	136	1174	1309
F01_transcript_16606	2	p1	(T)16	16	1366	1381	ACACAGATCCCTGGCATTTC	59.934	20	TTCGTTCTTATGAGCGGCTT	59.982	20	189	1290	1478	ACACAGATCCCTGGCATTTC	59.934	20	CGGTAGAAACTACAGCCCCA	60.125	20	246	1290	1535	CCCGGCTAGCTTGATAAGTG	59.861	20	TATGAAACCCGCAATGTCAA	59.93	20	274	1174	1447
F01_transcript_16609	1	p2	(TC)7	14	61	74	ACTTTCTTGTCTCCCTCGCC	60.766	20	AGCCAATCATACAGAACGGG	59.955	20	229	11	239	ACTTTCTTGTCTCCCTCGCC	60.766	20	AATAGCAGCTTTCGTCGCTC	59.758	20	188	11	198	ACTTTCTTGTCTCCCTCGCC	60.766	20	AGAAGGTTGTGATTCGCCAG	60.255	20	247	11	257
F01_transcript_16618	1	p4	(GGCC)5	20	1548	1567	AGATGCATGTCTGCGTTCTG	60.016	20	TCCCAGTTCAGTACAGGTGAGA	59.762	22	233	1378	1610	GAATGTTTGCCAGTGCTTGA	59.847	20	TCCCAGTTCAGTACAGGTGAGA	59.762	22	112	1499	1610	AGAGCAGGAATTGGATCGTG	60.218	20	TCCCAGTTCAGTACAGGTGAGA	59.762	22	149	1462	1610
F01_transcript_16620	1	p1	(A)12	12	1431	1442	CATTCCCAATTTCGTGAATCT	58.893	21	ACTATAGCCGTAACACCCCG	58.997	20	159	1399	1557	TCCCTCCTAGTTTACATTCCCA	59.829	22	ACTATAGCCGTAACACCCCG	58.997	20	173	1385	1557	CATTCCCAATTTCGTGAATCTT	60.184	22	ACTATAGCCGTAACACCCCG	58.997	20	159	1399	1557
F01_transcript_16624	1	p2	(CT)7	14	37	50	CGTCTGCTACCTTCACTCGC	61.136	20	ATCGAAGATTTGTCGTGCCT	59.7	20	128	14	141	CGTCTGCTACCTTCACTCGC	61.136	20	GGATTGCCTCTGCTATCGAA	60.318	20	142	14	155	CGTCTGCTACCTTCACTCGC	61.136	20	CCGTAGGATTGCCTCTGCTA	60.365	20	147	14	160
F01_transcript_16625	1	p3	(TGC)11	33	1429	1461	GCTGGCTTCTGAAAACTTGC	60.14	20	TGAAATCTGTGCACTCCAGC	59.992	20	247	1284	1530	GCTGGCTTCTGAAAACTTGC	60.14	20	GAAATCTGTGCACTCCAGCA	59.992	20	246	1284	1529	TGCTGGCTTCTGAAAACTTG	59.195	20	TGAAATCTGTGCACTCCAGC	59.992	20	248	1283	1530
F01_transcript_16632	1	p3	(CAA)6	18	279	296	CATCATCCATGCCTCAAGTG	60.072	20	TGTTCTGATGCTTCATTGGC	59.805	20	226	240	465	ACATCATCATCCATGCCTCA	59.882	20	TGTTCTGATGCTTCATTGGC	59.805	20	230	236	465	CATCATCCATGCCTCAAGTG	60.072	20	GCCCAACTTGTTCTGATGCT	60.263	20	234	240	473
F01_transcript_16632	2	p2	(TA)30	60	1454	1513	GGATCAAACGGACAACGTCT	59.973	20	CCCCTCAACAGTGGAAGAAA	60.081	20	181	1370	1550	AGGATCAAACGGACAACGTC	59.973	20	CCCCTCAACAGTGGAAGAAA	60.081	20	182	1369	1550	ACATCTGGGAGGATCAAACG	59.927	20	CCCCTCAACAGTGGAAGAAA	60.081	20	191	1360	1550
F01_transcript_16653	1	p3	(CTC)7	21	1404	1424	ATAAGAAGGCTGCGGTAGCA	60.003	20	CACTGGAGCATGGAAACAAA	59.691	20	133	1346	1478	GGTAGCAGCAGAGGGTGAAC	59.874	20	CACTGGAGCATGGAAACAAA	59.691	20	120	1359	1478	TGGCAGGAGGTCTGAAAAGT	59.844	20	CACTGGAGCATGGAAACAAA	59.691	20	238	1241	1478
F01_transcript_16655	1	p3	(CTC)5	15	27	41	--
F01_transcript_16657	1	p1	(T)12	12	257	268	CTTTTTCTCTTTTTGCGCGT	59.647	20	AGATCCACCCGTCTCATCAC	59.928	20	216	228	443	GTGGGGTTTTCCATTTGTTG	60.066	20	AGCAAATCAGCAAATCAGCC	60.361	20	274	26	299	CTTTTTCTCTTTTTGCGCGT	59.647	20	TAATTTCTGCACCCAAACCC	59.801	20	105	228	332
F01_transcript_16664	1	p2	(TA)6	12	851	862	GAAGGGAGTGGCAACTTGAG	59.844	20	TGTTTCACATCAGCAGGTGAC	59.742	21	219	767	985	GGGGACATGTTCAAAGCAAT	59.797	20	TGTTTCACATCAGCAGGTGAC	59.742	21	189	797	985	GGGAGTGGCAACTTGAGCTA	60.397	20	TGTTTCACATCAGCAGGTGAC	59.742	21	216	770	985
F01_transcript_16699	1	p3	(ATC)5	15	221	235	TTTATTATGCTGGGCGGAAG	60.054	20	GCTCAGGAATTGTTGGGTGT	59.973	20	163	109	271	TTTATTATGCTGGGCGGAAG	60.054	20	CTGCTCAGGAATTGTTGGGT	60.111	20	165	109	273	TTTATTATGCTGGGCGGAAG	60.054	20	GAAAGCAGGTGTTGACGGAT	60.119	20	243	109	351
F01_transcript_16704	1	p3	(TAG)5	15	190	204	TAATCCGACCGGAATCCATA	60.11	20	GGGCTTGTACGATGTCGTTT	60	20	279	134	412	TAATCCGACCGGAATCCATA	60.11	20	GAGGGTTTTGATGCTGGAAA	60.051	20	104	134	237	TAATCCGACCGGAATCCATA	60.11	20	AAACGAGGGTTTTGATGCTG	60.11	20	108	134	241
F01_transcript_16711	1	p1	(T)10	10	1468	1477	CATCTGCTGAATTCCACCCT	60.073	20	TGAAAATTTCCAAGTGCCAA	59.133	20	245	1288	1532	CATCTGCTGAATTCCACCCT	60.073	20	GAAAATTTCCAAGTGCCAACA	59.967	21	244	1288	1531	CATCTGCTGAATTCCACCCT	60.073	20	TGAAAATTTCCAAGTGCCAAC	59.967	21	245	1288	1532
F01_transcript_16712	1	p2	(AT)20	40	1386	1425	CGTAAATCTGGGAGCGTAGC	59.867	20	CTCTGACTTCTTGGCTTGGC	60.134	20	229	1249	1477	TTCTCATGGGCAACATAGCA	60.22	20	CTGACTTCTTGGCTTGGCTC	60.134	20	188	1288	1475	TTCTCATGGGCAACATAGCA	60.22	20	TGACTTCTTGGCTTGGCTCT	60.134	20	187	1288	1474
F01_transcript_16715	1	p2	(AG)6	12	39	50	TCCATTCCTCTCGTCGAAAC	60.195	20	GACGACGCCATTACGATTTT	59.967	20	113	4	116	TCCATTCCTCTCGTCGAAAC	60.195	20	ACGACGCCATTACGATTTTC	59.967	20	112	4	115	TCCATTCCTCTCGTCGAAAC	60.195	20	CGACGCCATTACGATTTTCT	60.096	20	111	4	114
F01_transcript_16720	1	p3	(CTG)6	18	117	134	TTCCGCAAATGGCTTCTACT	59.845	20	CCACAAGTGGGTAGGCAGAT	59.989	20	180	89	268	AATTCCGCAAATGGCTTCTA	59.682	20	CCACAAGTGGGTAGGCAGAT	59.989	20	182	87	268	TCCGCAAATGGCTTCTACTC	60.352	20	CCACAAGTGGGTAGGCAGAT	59.989	20	179	90	268
F01_transcript_16720	2	p1	(A)10	10	1262	1271	TTTATTTCAGCCCCATCTGC	60.038	20	TCTCTGGAGAGATTTTTGCTTTG	60.008	23	216	1090	1305	ATGGCATCGTTATCAGAGGG	59.917	20	TCTCTGGAGAGATTTTTGCTTTG	60.008	23	249	1057	1305	TTTATTTCAGCCCCATCTGC	60.038	20	TCTGGAGAGATTTTTGCTTTGTC	59.885	23	214	1090	1303
F01_transcript_16729	1	p1	(T)10	10	1562	1571	ACTGTGCTCAGCCTCTCCAT	60.017	20	TGGTGATTGAGTCGAACAGG	59.676	20	236	1401	1636	TTTCCTTGATCAACAGCACG	59.84	20	TGGTGATTGAGTCGAACAGG	59.676	20	280	1357	1636	AAGTGCACGTGCTAGCCTCT	60.223	20	TGGTGATTGAGTCGAACAGG	59.676	20	196	1441	1636
F01_transcript_16732	1	p1	(T)10	10	993	1002	GGATGTGGAAAGCCAAGTGT	59.973	20	TCAGGGTGTCAAAACAACCA	59.976	20	176	943	1118	GGATGTGGAAAGCCAAGTGT	59.973	20	TGGGATCTCTTCAGGGTGTC	60.048	20	186	943	1128	GGATGTGGAAAGCCAAGTGT	59.973	20	GGGATCTCTTCAGGGTGTCA	60.048	20	185	943	1127
F01_transcript_16740	1	p2	(AG)8	16	11	26	--
F01_transcript_16740	2	p3	(GTG)5	15	635	649	TGTTGAGGTAAAACGGGCTC	60.11	20	GCCACCACCTGAAGATTGTT	59.973	20	193	590	782	TGTTGAGGTAAAACGGGCTC	60.11	20	GGATAGCCACCACCTGAAGA	60.073	20	198	590	787	CGCGGTTTTGGTTTCATATC	60.323	20	GCCACCACCTGAAGATTGTT	59.973	20	279	504	782
F01_transcript_16744	1	p3	(CTG)6	18	302	319	CGATGCAATCACAGAAGCAT	59.83	20	TGACTCATCTGTAGCAGCGG	60.16	20	196	179	374	TGGGTGACGAGATAGAGGCT	59.827	20	TGACTCATCTGTAGCAGCGG	60.16	20	236	139	374	CGATGCAATCACAGAAGCAT	59.83	20	CAGCAGTAGCAGCGTTTGAC	59.812	20	212	179	390
F01_transcript_16753	1	p2	(TC)27	54	43	96	CGATTCCAAATTAGTCCCCA	59.756	20	TAAGCTGACCCATTGCTCCT	59.836	20	132	5	136	CGATTCCAAATTAGTCCCCA	59.756	20	TTAAGCTGACCCATTGCTCC	60.214	20	133	5	137	GCGATTCCAAATTAGTCCCC	60.642	20	TAAGCTGACCCATTGCTCCT	59.836	20	133	4	136
F01_transcript_16755	1	p1	(T)10	10	361	370	ACCCCCAAATCCGAATAAAT	59.38	20	CAGTTTCGGTGTTTGGTGAA	59.585	20	227	251	477	TTTTGGGGTCCAATTTCATC	59.599	20	GTCATTTCTACACCAGCGGC	60.667	20	274	142	415	GGGGTCCAATTTCATCCTTC	60.505	20	GTCATTTCTACACCAGCGGC	60.667	20	270	146	415
F01_transcript_16769	1	p1	(A)10	10	976	985	GCTGTTTGGCCTGGTTTTAG	59.747	20	GAGCCTACTGGAGATGCTGG	59.973	20	219	944	1162	CTGTTTGGCCTGGTTTTAGC	59.747	20	GAGCCTACTGGAGATGCTGG	59.973	20	218	945	1162	TGTTGCTGGTTGTTGCTTGT	60.347	20	GAGCCTACTGGAGATGCTGG	59.973	20	241	922	1162
F01_transcript_16779	1	p2	(TA)17	34	469	502	CGCCTCTCTCCTGGTACTTTC	60.388	21	CCAAAGTCCACAATGCAGAA	59.691	20	279	407	685	TTTCTTCGTTATCGTCCTTGC	59.352	21	GCCAAACCAAAGTCCACAAT	59.836	20	268	424	691	TTTCTTCGTTATCGTCCTTGC	59.352	21	AAGCCAAACCAAAGTCCACA	60.529	20	270	424	693
F01_transcript_16796	1	p2	(CT)6	12	25	36	GACCGTGACTTTTGCTTGTTT	59.276	21	GTGTTGTTGCGTCCTTCAGA	59.88	20	274	0	273	GACCGTGACTTTTGCTTGTTT	59.276	21	TTGTCACCCTGTGCTGTCTC	59.872	20	209	0	208	GACCGTGACTTTTGCTTGTTT	59.276	21	CATTGTCACCCTGTGCTGTC	60.162	20	211	0	210
F01_transcript_16798	1	p6	(CAGGCC)5	30	1479	1508	GAATGACATGGGGAATGTGG	60.995	20	CAACCACATTAATTACCCTGCC	60.47	22	177	1406	1582	GAATGACATGGGGAATGTGG	60.995	20	CCAACCACATTAATTACCCTGC	60.47	22	178	1406	1583	TTTCTGATTTTGTTGCCCATC	59.93	21	CAACCACATTAATTACCCTGCC	60.47	22	149	1434	1582
F01_transcript_16800	1	p2	(TA)6	12	135	146	GGACAGTGAAGCTAACCCCA	60.111	20	AGCACCAAGACCAGCAGAAT	59.874	20	252	39	290	GGACAGTGAAGCTAACCCCA	60.111	20	CAAGACCAGCAGAATCAGCA	60.136	20	247	39	285	GGACAGTGAAGCTAACCCCA	60.111	20	CACCAAGACCAGCAGAATCA	59.831	20	250	39	288
F01_transcript_16825	1	p1	(T)10	10	1668	1677	--
F01_transcript_16828	1	p3	(TAA)5	15	1458	1472	GAAATCGTGAAACCCCTTGA	59.91	20	TCCACATGAGAAGTGTTTGC	57.203	20	149	1396	1544	GAGGAAATCGTGAAACCCCT	60.306	20	TCCACATGAGAAGTGTTTGC	57.203	20	152	1393	1544	GTGGAGGAAATCGTGAAACC	59.386	20	TCCACATGAGAAGTGTTTGC	57.203	20	155	1390	1544
F01_transcript_16831	1	p1	(T)10	10	1503	1512	ACTGTGCTCAGCCTCTCCAT	60.017	20	TGGTGATTGAGTCGAACAGG	59.676	20	237	1341	1577	AAGTGCACGTGCTAGCCTCT	60.223	20	TGGTGATTGAGTCGAACAGG	59.676	20	197	1381	1577	CGGGGTAGCGATTAGATCAG	59.685	20	TGGTGATTGAGTCGAACAGG	59.676	20	263	1315	1577
F01_transcript_16845	1	p3	(CTT)6	18	97	114	CACTTGGAATCTCTCCCCAA	60.042	20	TTTTGGTCGCTACTTACCGC	60.264	20	224	39	262	CACTTGGAATCTCTCCCCAA	60.042	20	TCCTGGTTTTGGTCGCTACT	59.734	20	230	39	268	CTCCCCAAAACAAGCCAATA	59.931	20	TTTTGGTCGCTACTTACCGC	60.264	20	212	51	262
F01_transcript_16852	1	p3	(GAA)8	24	1507	1530	GTCATTCGCACTTTGCGTTA	59.879	20	GCCGAATAGTTCTGCTGAAAA	59.488	21	190	1384	1573	AACCGTTGGTATGTGAAGCC	59.859	20	GCCGAATAGTTCTGCTGAAAA	59.488	21	117	1457	1573	GTCAAGGGCATATGGATTGG	60.155	20	GCCGAATAGTTCTGCTGAAAA	59.488	21	234	1340	1573
F01_transcript_16865	1	c	(CCA)5tcat(CAC)5	34	564	597	TTGATTCCGATCAATCCCTC	59.831	20	TTGGAGAATAGTGGCCGAAC	60.074	20	266	421	686	TCTTGATTCCGATCAATCCC	59.831	20	TTGGAGAATAGTGGCCGAAC	60.074	20	268	419	686	TCTTGATTCCGATCAATCCC	59.831	20	GTTGGAGAATAGTGGCCGAA	60.074	20	269	419	687
F01_transcript_16879	1	p1	(T)10	10	1493	1502	CGAGGCACTGAAGATTCACA	59.984	20	CGAGGAACATAAGCCAGCTC	59.978	20	253	1380	1632	GCAAACTTCGGAAGCAAGAA	60.502	20	CGAGGAACATAAGCCAGCTC	59.978	20	193	1440	1632	CGGAAGCAAGAAACCCTTTT	60.584	20	CGAGGAACATAAGCCAGCTC	59.978	20	185	1448	1632
F01_transcript_16881	1	p1	(T)13	13	1554	1566	GACTCGGTACAAGCGTCACA	59.905	20	GGAACAAAAAGAACAGCTAGAATTA	57.462	25	248	1399	1646	TGACTCGGTACAAGCGTCAC	59.905	20	GGAACAAAAAGAACAGCTAGAATTA	57.462	25	249	1398	1646	CTCGGTACAAGCGTCACAAA	59.904	20	GGAACAAAAAGAACAGCTAGAATTA	57.462	25	246	1401	1646
F01_transcript_16884	1	p3	(CAG)5	15	8	22	--
F01_transcript_16892	1	p1	(A)14	14	1612	1625	--
F01_transcript_16893	1	p3	(AAT)8	24	1612	1635	--
F01_transcript_16894	1	p4	(TCCC)7	28	57	84	GTCATCCTCATCCTCCCCTT	60.278	20	AGGGGAAACATGGGTTTAGG	60.046	20	215	28	242	GTCATCCTCATCCTCCCCTT	60.278	20	TCAAGTCTCCTGAATCGGCT	59.95	20	135	28	162	GTCATCCTCATCCTCCCCTT	60.278	20	CAAGTCTCCTGAATCGGCTC	59.95	20	134	28	161
F01_transcript_16908	1	p2	(TA)22	44	59	102	TTTCATCATATATTCTCCTCCTCTCA	59.528	26	TCTTAACCAAAGCCCAGGAA	59.679	20	105	26	130	TTTCATCATATATTCTCCTCCTCTCA	59.528	26	TAACCAAAGCCCAGGAAAGA	59.679	20	102	26	127	TCATATATTCTCCTCCTCTCAGTCA	58.443	25	TCTTAACCAAAGCCCAGGAA	59.679	20	100	31	130
F01_transcript_16911	1	p1	(A)12	12	626	637	GACCGGGATGTATCCAATTTT	59.902	21	AATTTTACGGTCCCTACCCG	60.068	20	238	430	667	GACCGGGATGTATCCAATTTT	59.902	21	GCTATCAAAACGATGTCGCA	59.839	20	278	430	707	CCGGGATGTATCCAATTTTT	58.622	20	AATTTTACGGTCCCTACCCG	60.068	20	236	432	667
F01_transcript_16912	1	p3	(TAG)6	18	1247	1264	TTAATGAGGTGGGGCTTTTG	59.931	20	TTCCCTGTCTGTCTCCCAAC	60.088	20	180	1154	1333	TTAATGAGGTGGGGCTTTTG	59.931	20	GTTTCCCTGTCTGTCTCCCA	60.088	20	182	1154	1335	TTAATGAGGTGGGGCTTTTG	59.931	20	CAACAAGATTCTTCCCCCAA	59.903	20	164	1154	1317
F01_transcript_16927	1	p1	(A)11	11	81	91	TTCCTTCGGTTATTGCTTGG	60.067	20	CAAATCCAGCCTTGACCATT	59.933	20	192	5	196	TTCCTTCGGTTATTGCTTGG	60.067	20	CAGCCTTGACCATTCCAGTT	60.111	20	186	5	190	TTCCTTCGGTTATTGCTTGG	60.067	20	TTCCATTGTCGCACACAAGT	60.16	20	168	5	172
F01_transcript_16942	1	p2	(CT)6	12	67	78	GCTTCGGTTTCCTTCGTGTA	60.249	20	TTTCACAAGCTGAAAGCCCT	59.993	20	195	40	234	GCTTCGGTTTCCTTCGTGTA	60.249	20	CCTAATTGCGTAAGGACCGA	60.089	20	151	40	190	AGATCGAGCTTCGGTTTCCT	60.349	20	TTTCACAAGCTGAAAGCCCT	59.993	20	202	33	234
F01_transcript_16945	1	c	(C)23(A)14	37	634	670	CCTCTCCGCAAAAGTGAAAG	59.986	20	CGCCATAAAGGAAGCAAAAA	60.198	20	130	592	721	CCTCTCCGCAAAAGTGAAAG	59.986	20	ACGCCATAAAGGAAGCAAAA	59.72	20	131	592	722	ATTTTTGTCCCACCCTCTCC	60.169	20	CGCCATAAAGGAAGCAAAAA	60.198	20	143	579	721
F01_transcript_16956	1	p1	(T)12	12	1482	1493	ATGGCCATGTTCCTATCAGC	59.923	20	GCCAAACATATCTTTTGAGGAA	58.25	22	238	1304	1541	TATTGGTCAGGAGGGACAGG	59.92	20	GCCAAACATATCTTTTGAGGAA	58.25	22	150	1392	1541	CCTATTGGTCAGGAGGGACA	59.92	20	GCCAAACATATCTTTTGAGGAA	58.25	22	152	1390	1541
F01_transcript_16959	1	c	(ATC)9(AT)11	49	366	414	CATTTATGACCCCCATTTTGA	59.511	21	AAAAATCGTCATAGGCGACTG	59.238	21	261	204	464	TCATTTATGACCCCCATTTTG	59.511	21	AAAAATCGTCATAGGCGACTG	59.238	21	262	203	464	CATTTATGACCCCCATTTTGA	59.511	21	AAAATCGTCATAGGCGACTG	57.849	20	260	204	463
F01_transcript_16959	2	p2	(AT)15	30	569	598	GTTTCCGTCGCTATAACCCA	59.96	20	GCAGAAGAGAGGAAGTGGGA	59.53	20	128	499	626	GACGGTTTCCGTCGCTATAA	60.096	20	GCAGAAGAGAGGAAGTGGGA	59.53	20	132	495	626	TTTCCGTCGCTATAACCCAT	59.433	20	GCAGAAGAGAGGAAGTGGGA	59.53	20	127	500	626
F01_transcript_16964	1	p6	(TCATCT)6	36	233	268	TAATGGCCATAGCTGCTCCT	59.829	20	GACTACGTTTGGACGGTGGT	59.891	20	208	117	324	CTAATGGCCATAGCTGCTCC	59.829	20	GACTACGTTTGGACGGTGGT	59.891	20	209	116	324	GCTGCTCCTTCTCTCCTCAA	59.827	20	GACTACGTTTGGACGGTGGT	59.891	20	197	128	324
F01_transcript_16968	1	p2	(CT)7	14	42	55	AGGGCAGAGAACTGGAGAAA	59.014	20	CTCTTCTTTGGAGCACGACC	59.989	20	122	6	127	AAAGGGCAGAGAACTGGAGA	59.014	20	CTCTTCTTTGGAGCACGACC	59.989	20	124	4	127	AAGGGCAGAGAACTGGAGAA	59.014	20	CTCTTCTTTGGAGCACGACC	59.989	20	123	5	127
F01_transcript_16980	1	p3	(CAA)6	18	1224	1241	ACCTATGACCGGACAAGTCG	59.989	20	CCAACCTGGGTATGAACCTG	60.224	20	207	1132	1338	CGGTCAGGGTTACTACGGAA	59.986	20	CCAACCTGGGTATGAACCTG	60.224	20	189	1150	1338	ACCTATGACCGGACAAGTCG	59.989	20	CTTTGGCTGCTGAAATGGTT	60.249	20	133	1132	1264
F01_transcript_16981	1	p6	(CATCTT)6	36	168	203	TAATGGCCATAGCTGCTCCT	59.829	20	GACTACGTTTGGACGGTGGT	59.891	20	209	50	258	CTAATGGCCATAGCTGCTCC	59.829	20	GACTACGTTTGGACGGTGGT	59.891	20	210	49	258	GCTGCTCCTTCTCTCCTCAA	59.827	20	GACTACGTTTGGACGGTGGT	59.891	20	198	61	258
F01_transcript_16992	1	p1	(C)23	23	1544	1566	--
F01_transcript_16994	1	p2	(AT)17	34	25	58	--
F01_transcript_17032	1	p3	(TGC)9	27	1404	1430	CACTAGCACCAAGCCTGTCA	60.049	20	TTTTCATTTTCTTGCCTGCC	60.188	20	150	1328	1477	CAAGGCATCGAAGGCATATT	60.06	20	TTTTCATTTTCTTGCCTGCC	60.188	20	193	1285	1477	AGCACCAAGCCTGTCAAACT	59.914	20	TTTTCATTTTCTTGCCTGCC	60.188	20	146	1332	1477
F01_transcript_17050	1	p1	(T)13	13	1562	1574	--
F01_transcript_17058	1	p3	(GGA)11	33	514	546	GCCTGGGATCTACACTTGGA	60.073	20	GCTTCCCACAGCTTGAACTC	59.997	20	232	423	654	CCTTTACCGGATGTCCCTCT	60.319	20	GCTTCCCACAGCTTGAACTC	59.997	20	270	385	654	GCCTGGGATCTACACTTGGA	60.073	20	TCGAAGTCTGCTGCATCTTG	60.287	20	214	423	636
F01_transcript_17059	1	p2	(GA)6	12	16	27	--
F01_transcript_17059	2	p3	(AGA)5	15	193	207	TAATAGTTGGCGGGGAGTTG	59.953	20	GGTTTCTACCCAGGCTTTTTG	59.987	21	156	114	269	TAATAGTTGGCGGGGAGTTG	59.953	20	TGGTTTCTACCCAGGCTTTTT	59.987	21	157	114	270	TAATAGTTGGCGGGGAGTTG	59.953	20	TTGGTTTCTACCCAGGCTTTT	59.987	21	158	114	271
F01_transcript_17059	3	p1	(T)17	17	1445	1461	TACTTTGAGCCACCCCACTT	59.592	20	CCATTGACCAAGTCAAACACA	59.45	21	127	1399	1525	ACTTTGAGCCACCCCACTTT	60.912	20	CCATTGACCAAGTCAAACACA	59.45	21	126	1400	1525	AATACTTTGAGCCACCCCAC	58.912	20	CCATTGACCAAGTCAAACACA	59.45	21	129	1397	1525
F01_transcript_17061	1	p3	(AGC)5	15	1107	1121	TCAACTGCATCAGTTCCAGC	59.992	20	CAAAGGTCCAAATGGCAAAT	59.801	20	159	1074	1232	TCAATTCCAGCAGCATCAAC	59.805	20	CAAAGGTCCAAATGGCAAAT	59.801	20	174	1059	1232	TCATCAATTCCAGCAGCATC	59.763	20	CAAAGGTCCAAATGGCAAAT	59.801	20	177	1056	1232
F01_transcript_17066	1	p1	(A)28	28	197	224	TAAACCCACAGAAAACCCCA	60.198	20	TTTGAACACATTCCAAGCCA	60.088	20	181	141	321	TAAACCCACAGAAAACCCCA	60.198	20	TTCCAAGCCATTACAGCTCC	60.214	20	171	141	311	CCCACAGAAAACCCCAATTA	59.657	20	TTTGAACACATTCCAAGCCA	60.088	20	177	145	321
F01_transcript_17070	1	p3	(CAC)5	15	178	192	CCTCCAAGAACACCGACAAT	59.966	20	CACCAGGGGTTCTTCTTTGA	60.081	20	134	116	249	CCTCCAAGAACACCGACAAT	59.966	20	TCTTCAGACACCAGGGGTTC	60.088	20	142	116	257	CCTCCAAGAACACCGACAAT	59.966	20	TCAGACACCAGGGGTTCTTC	60.088	20	139	116	254
F01_transcript_17077	1	p3	(TTA)5	15	493	507	GGGTCAAATGGAATTCACAGA	59.782	21	GCGCTCAAGCTCTAATGGTC	60.125	20	260	353	612	GGGAGCTTAAATGCCATGC	60.568	19	GCGCTCAAGCTCTAATGGTC	60.125	20	191	422	612	GGGTCAAATGGAATTCACAGA	59.782	21	CGCAGAATATGGGCTTCATC	60.574	20	219	353	571
F01_transcript_17078	1	p2	(AT)15	30	802	831	AAATGAGAATGATGCATGTGAAA	59.47	23	ATTGCCAACTGCCTACTGGT	59.621	20	274	735	1008	TGAACAGAATTCTAGGGGTGTG	59.097	22	CAATTACTTCGCCTCAACCAA	60.117	21	209	682	890	TGAACAGAATTCTAGGGGTGTG	59.097	22	CAATTACTTCGCCTCAACCA	58.771	20	209	682	890
F01_transcript_17079	1	p4	(CCTG)5	20	51	70	ATCCATTGTTGAGGCCACTC	59.934	20	TTTAACGGCAAAAGGGTGAC	59.975	20	278	6	283	ATCCATTGTTGAGGCCACTC	59.934	20	GACCCGAATTGACGTCCTTA	59.933	20	261	6	266	ATCCATTGTTGAGGCCACTC	59.934	20	CCCCTGCTTTTCTTCTTCCT	59.821	20	161	6	166
F01_transcript_17096	1	p3	(TTA)5	15	15	29	--
F01_transcript_17110	1	p1	(T)10	10	1517	1526	TAGGAGTGCCGCATACTGTG	59.888	20	AGCAATGCTCTCAGAATATCCA	58.955	22	160	1465	1624	TAGGAGTGCCGCATACTGTG	59.888	20	GCAATGCTCTCAGAATATCCA	57.928	21	159	1465	1623	TAGGAGTGCCGCATACTGTG	59.888	20	AAGCAATGCTCTCAGAATATCCA	60.238	23	161	1465	1625
F01_transcript_17132	1	p3	(CAG)5	15	1330	1344	AGACGTGGGAGGTCATCATC	59.928	20	AAAAGTCCTTGTTGCAAGCC	59.359	20	180	1222	1401	GACCTGCTCGTTCACTTTCC	59.851	20	AAAAGTCCTTGTTGCAAGCC	59.359	20	239	1163	1401	TCGTAGACGTTCCCGTTCTC	60.255	20	AAAAGTCCTTGTTGCAAGCC	59.359	20	268	1134	1401
F01_transcript_17133	1	c	(T)10ggaaataggagtatgatttttttttgattcaggtatctgtatgatttttgtatgtgtatgtgttttttta(T)10gtatgtgtatgattttttctctgatgtattttagatatctgatgactgattagatatctga(T)11gattttgattttagtttttttttctctgtatgtgactctgtatgatttttgtatgtgtatgtg(T)16	241	338	578	--
F01_transcript_17136	1	p6	(ACTAAT)6	36	1535	1570	GGTTTCCTCGAGTTTCACCA	60.088	20	TGATGGCATAAGTTCACGTAAGA	59.661	23	177	1447	1623	CCTCGAGTTTCACCAAAAGC	59.853	20	TGATGGCATAAGTTCACGTAAGA	59.661	23	172	1452	1623	TCTCGAAAGAGTTGATGGGG	60.187	20	TGATGGCATAAGTTCACGTAAGA	59.661	23	195	1429	1623
F01_transcript_17139	1	p2	(AT)14	28	944	971	CTTTGGAGATTTGGCTCCTG	59.807	20	GCAAATAAGGGCTGGCAATA	60.061	20	238	761	998	GGTTATGCTGCCTTTGGAGA	60.214	20	GCAAATAAGGGCTGGCAATA	60.061	20	249	750	998	ATGCTGCCTTTGGAGATTTG	60.214	20	GCAAATAAGGGCTGGCAATA	60.061	20	245	754	998
F01_transcript_17142	1	p2	(AG)6	12	67	78	AAGAGCAGCGAGTGAACAGA	58.909	20	GAAAACAATGGGGTGGAATG	60.029	20	251	1	251	GAAGAGCAGCGAGTGAACAG	58.909	20	GAAAACAATGGGGTGGAATG	60.029	20	252	0	251	AAGAGCAGCGAGTGAACAGA	58.909	20	TGAAAACAATGGGGTGGAAT	60.029	20	252	1	252
F01_transcript_17151	1	p1	(T)11	11	1508	1518	AAGTACGGATCTGGTGGTGC	59.997	20	TCGAGGAGTAGCGATTGCAT	60.905	20	236	1338	1573	TACGGATCTGGTGGTGCATA	59.948	20	TCGAGGAGTAGCGATTGCAT	60.905	20	233	1341	1573	AAGTACGGATCTGGTGGTGC	59.997	20	CATTGGCAGCCACTTTAAGA	58.917	20	219	1338	1556
F01_transcript_17154	1	p2	(AG)6	12	71	82	GAAAGCAGCGAGTGAACAGA	59.318	20	GGCTTCAGCTGCAGTCTTCT	59.898	20	253	34	286	GAAAGCAGCGAGTGAACAGA	59.318	20	GATCCGACATACGACCACCT	59.81	20	221	34	254	GAGAAAGCAGCGAGTGAACA	59.318	20	GATCCGACATACGACCACCT	59.81	20	223	32	254
F01_transcript_17158	1	p1	(T)10	10	1519	1528	AGCCTCTTGTGAAGGAAGCA	60.134	20	CATTGGTATGGTGGCAACAC	59.697	20	260	1305	1564	GCTTGGGTTCAACTTGCTTC	59.859	20	CATTGGTATGGTGGCAACAC	59.697	20	220	1345	1564	TATTGTGATCGGTCTTGGCA	60.073	20	TGGTATGGTGGCAACACTTG	60.427	20	164	1398	1561
F01_transcript_17160	1	p3	(ACT)11	33	73	105	TTCGGATTTTCAGATTAGGTTCTT	59.544	24	GCCTTTAGAGCTTTCAGCGA	59.867	20	248	19	266	TTCGGATTTTCAGATTAGGTTC	57.384	22	GCCTTTAGAGCTTTCAGCGA	59.867	20	248	19	266	TCGGATTTTCAGATTAGGTTCTT	58.342	23	GCCTTTAGAGCTTTCAGCGA	59.867	20	247	20	266
F01_transcript_17161	1	p2	(TC)7	14	82	95	ACTTTCTTGTCTCCCTCGCC	60.766	20	AGCCAATCATACAGAACGGG	59.955	20	229	32	260	ACTTTCTTGTCTCCCTCGCC	60.766	20	AATAGCAGCTTTCGTCGCTC	59.758	20	188	32	219	ACTTTCTTGTCTCCCTCGCC	60.766	20	AGAAGGTTGTGATTCGCCAG	60.255	20	247	32	278
F01_transcript_17170	1	p2	(TA)14	28	112	139	GAAAGAAGAGGGTGGGGACT	59.534	20	AGAAAGGCTGTGTTTGGTGG	60.149	20	154	34	187	AGAAAGAAGAGGGTGGGGAC	59.534	20	AAAGGCTGTGTTTGGTGGAG	60.149	20	153	33	185	AGAAAGAAGAGGGTGGGGAC	59.534	20	AGAAAGGCTGTGTTTGGTGG	60.149	20	155	33	187
F01_transcript_17181	1	p1	(T)10	10	2	11	--
F01_transcript_17194	1	p3	(ATT)5	15	384	398	TCTCTGGCACGTCAACTGTC	60.03	20	TCTTGGGTCTTGGAGGTGAC	60.088	20	199	294	492	CATTCTCTCTGGCACGTCAA	59.984	20	CAGCAAAATGAACTACGCCA	59.872	20	268	289	556	TCTCTGGCACGTCAACTGTC	60.03	20	CAGCAAAATGAACTACGCCA	59.872	20	263	294	556
F01_transcript_17196	1	c	(GA)12ggagagatggaggtgaatggaaatagggaagaagaaccggcggagagagattcggatattacgttgttgatgaagtcgccgc(CAT)8	130	29	158	TTCCATATTTGTTTGAGTTGGAA	58.531	23	GAGAGCCAGATGCGAAACTT	59.579	20	197	2	198	TTCCATATTTGTTTGAGTTGGAA	58.531	23	AGAGCCTCCAATGTCGAGAG	59.555	20	212	2	213	TTCCATATTTGTTTGAGTTGGAA	58.531	23	TGCGAAACTTGATCGACTGA	60.539	20	187	2	188
F01_transcript_17198	1	p6	(CCGCCC)6	36	249	284	CCAACCTCCCTCCTAACCTC	59.928	20	GGAAAATTGGGAGGTGGAAT	59.996	20	192	172	363	AACCTCCCTCCTAACCTCCA	59.928	20	GGAAAATTGGGAGGTGGAAT	59.996	20	190	174	363	CAACCTCCCTCCTAACCTCC	59.928	20	GGAAAATTGGGAGGTGGAAT	59.996	20	191	173	363
F01_transcript_17198	2	p3	(GAG)6	18	1430	1447	GCTGTGGAAGGAACCAGAAG	59.844	20	TTACATAGAAGCACATGCCGA	59.339	21	188	1284	1471	AGCTGTGGAAGGAACCAGAA	59.844	20	TTACATAGAAGCACATGCCGA	59.339	21	189	1283	1471	TGTCAGATTGCTAGGGAGCC	60.362	20	TTACATAGAAGCACATGCCGA	59.339	21	217	1255	1471
F01_transcript_17210	1	p2	(TC)6	12	82	93	CTTCCCCAAATATTCCCGTT	60.013	20	AGGGAAGACCAGGATGTGTG	59.962	20	112	54	165	CTTCCCCAAATATTCCCGTT	60.013	20	TGAAAGAAGCGGGTCTAGGA	59.948	20	235	54	288	CCCCAAATATTCCCGTTCTT	60.013	20	TAGCGAGTTGGTGGGTTAGG	60.125	20	164	57	220
F01_transcript_17216	1	p1	(A)13	13	58	70	--
F01_transcript_17219	1	p1	(A)10	10	181	190	CGGTGGGGTAGTTAATGTGG	60.103	20	CCTCTTCTTGATGGCCTTTG	59.807	20	138	87	224	CCGGTGGGGTAGTTAATGTG	60.103	20	CCTCTTCTTGATGGCCTTTG	59.807	20	139	86	224	CGGTGGGGTAGTTAATGTGG	60.103	20	TTTATCTTGCTCCTCCGTCG	60.344	20	280	87	366
F01_transcript_17219	2	p1	(T)14	14	1522	1535	CAAACAATGGTGAGGACACG	60.001	20	CTCTAACAAAGGCTACGGGG	58.856	20	234	1339	1572	AGGCAAACAATGGTGAGGAC	59.973	20	CTCTAACAAAGGCTACGGGG	58.856	20	237	1336	1572	GGTGAGGACACGGATCAAGT	59.969	20	CTCTAACAAAGGCTACGGGG	58.856	20	226	1347	1572
F01_transcript_17235	1	p1	(T)10	10	79	88	TGGCTATAATAATAACCCTAGTGTCG	59.035	26	CCTTTGGACTGTGTCAGGGT	60.002	20	142	46	187	TGGCTATAATAATAACCCTAGTGTCG	59.035	26	TTTCTTAGGGGTGGCTGATG	60.066	20	115	46	160	TGGCTATAATAATAACCCTAGTGTCG	59.035	26	TCTTAGGGGTGGCTGATGAC	60.073	20	113	46	158
F01_transcript_17235	2	p3	(TGA)6	18	1079	1096	GGGATTCGTGAAGTCCGATA	59.894	20	ATGTTTCCACTTCCTCACCG	59.966	20	227	1022	1248	GGGATTCGTGAAGTCCGATA	59.894	20	TATTGTCAATCACCGCCAAA	59.93	20	178	1022	1199	GGGATTCGTGAAGTCCGATA	59.894	20	TTTATTGTCAATCACCGCCA	59.93	20	180	1022	1201
F01_transcript_17242	1	p3	(CCA)5	15	97	111	CGATAGATCCACCGAAGAGC	59.797	20	CCTCAAGCGGTAGCAAACTC	60.015	20	171	44	214	CGATAGATCCACCGAAGAGC	59.797	20	GGCTGAGCTACGACGAAATC	59.985	20	121	44	164	TCCGATAATGGGGTCGATAG	59.739	20	CCTCAAGCGGTAGCAAACTC	60.015	20	185	30	214
F01_transcript_17257	1	p2	(AT)13	26	1496	1521	--
F01_transcript_17258	1	p1	(T)10	10	1439	1448	CTGGCTTGACAATGCGACTA	60.011	20	CGGCCAACACTAGCCTATCT	59.359	20	234	1361	1594	TGGCTTGACAATGCGACTAC	59.871	20	CGGCCAACACTAGCCTATCT	59.359	20	233	1362	1594	GGCTTGACAATGCGACTACA	59.871	20	CGGCCAACACTAGCCTATCT	59.359	20	232	1363	1594
F01_transcript_17259	1	p1	(T)14	14	1414	1427	GGGATACAAGGATGGCCTGT	61.106	20	CCATCGCCTAGCCTGTAAAA	60.223	20	219	1287	1505	GGGATACAAGGATGGCCTGT	61.106	20	TTTAACCATCGCCTAGCCTG	60.223	20	224	1287	1510	GGGATACAAGGATGGCCTGT	61.106	20	ACCATCGCCTAGCCTGTAAA	59.73	20	220	1287	1506
F01_transcript_17268	1	p3	(ACT)5	15	437	451	GCACAAAGCCTGGTAGCAAT	60.278	20	CCTATTTGCCACACCTGGTT	59.853	20	215	373	587	GCACAAAGCCTGGTAGCAAT	60.278	20	CAGAAAGCGGACCTATTTGC	59.845	20	226	373	598	GCCTGGTAGCAATCAGGAAC	59.7	20	CCTATTTGCCACACCTGGTT	59.853	20	208	380	587
F01_transcript_17272	1	p3	(ACT)6	18	1	18	--
F01_transcript_17276	1	p3	(GAG)6	18	1127	1144	GGAAGCTGCAAGATGTGTCA	59.992	20	ATGCTCATCATCCCTGGACT	59.491	20	266	1017	1282	GGAAGCTGCAAGATGTGTCA	59.992	20	TGCTCATCATCCCTGGACTT	60.622	20	265	1017	1281	TGAGGAAGCTGCAAGATGTG	60.136	20	ATGCTCATCATCCCTGGACT	59.491	20	269	1014	1282
F01_transcript_17276	2	p3	(TGA)11	33	1295	1327	GTGCTGATGAGGAGGAGGAG	59.945	20	CCACATTGCTTTGTTTTCCC	60.344	20	264	1118	1381	AGTGCTGATGAGGAGGAGGA	59.945	20	CCACATTGCTTTGTTTTCCC	60.344	20	265	1117	1381	AGGAGCAGCAGCAGCATATT	60.147	20	CCACATTGCTTTGTTTTCCC	60.344	20	243	1139	1381
F01_transcript_17292	1	p2	(TA)10	20	74	93	CCGTGTTCGAGTGTCTCTGA	60.022	20	ACTCAAAACCCAAAATCCCC	60.032	20	176	15	190	TGAAGTATGCCACCGTGTTC	59.572	20	ACTCAAAACCCAAAATCCCC	60.032	20	188	3	190	CCGTGTTCGAGTGTCTCTGA	60.022	20	TGAAGGAAGCAAAATCCCAA	60.555	20	111	15	125
F01_transcript_17294	1	p1	(A)11	11	25	35	--
F01_transcript_17304	1	p4	(GTTT)5	20	1466	1485	GGTGAGATAAGGAGGAGGGC	60.037	20	TTCACACGCATCCCATTTTA	59.93	20	212	1351	1562	GTGATGTCAGGATGTCGGTG	59.962	20	TTCACACGCATCCCATTTTA	59.93	20	178	1385	1562	GGTGAGATAAGGAGGAGGGC	60.037	20	AAGGCACTCATTGGCATTTC	60.081	20	229	1351	1579
F01_transcript_17317	1	c	(AGGAAG)5aggag(GAA)6	53	104	156	CCCACTCCCCTCTCTTCACT	60.638	20	TTTCTTCGAACCACCCAAAC	59.948	20	129	63	191	CCCACTCCCCTCTCTTCACT	60.638	20	CGGATCCATGCGTAATTTCT	59.923	20	144	63	206	CCCACTCCCCTCTCTTCACT	60.638	20	TGCACATTGCTTTCATCCAT	60.08	20	278	63	340
F01_transcript_17323	1	p1	(A)10	10	730	739	CAGTTTAATTAGCCGCGGAA	60.218	20	TAACCCATATGCCCGTGATT	60.038	20	230	682	911	CAGTTTAATTAGCCGCGGAA	60.218	20	ATATGCCCGTGATTTGCCTA	60.31	20	224	682	905	CAGTTTAATTAGCCGCGGAA	60.218	20	CCAAGATCAACACGGTGAAG	59.135	20	121	682	802
F01_transcript_17327	1	p2	(TA)6	12	1590	1601	--
F01_transcript_17346	1	p4	(TTGT)5	20	603	622	AGGTCCCACTCGTTCCTTTT	59.972	20	CCAACCAGACATCCTTACCC	59.259	20	257	501	757	AAAAGGTCCCACTCGTTCCT	59.972	20	CCAACCAGACATCCTTACCC	59.259	20	260	498	757	AAGGTCCCACTCGTTCCTTT	59.972	20	CCAACCAGACATCCTTACCC	59.259	20	258	500	757
F01_transcript_17361	1	p3	(CTC)11	33	53	85	TCACTTTCTTTCGTGGTTGTCT	58.887	22	TTTCTGAGGAGTGAGGGGG	60.175	19	149	21	169	TCACTTTCTTTCGTGGTTGTC	57.841	21	TTTCTGAGGAGTGAGGGGG	60.175	19	149	21	169	TCACTTTCTTTCGTGGTTGTCTT	60.192	23	TTTCTGAGGAGTGAGGGGG	60.175	19	149	21	169
F01_transcript_17361	2	p2	(GA)8	16	495	510	TGGGCTGGTAAAACTTTTGG	59.968	20	CAGCTGTTTTCCACACGATG	60.301	20	204	459	662	TGGGCTGGTAAAACTTTTGG	59.968	20	GCTGTTTTCCACACGATGAA	59.697	20	202	459	660	TGGGCTGGTAAAACTTTTGG	59.968	20	GACGGACGAAGCTTGAAAAA	60.365	20	267	459	725
F01_transcript_17363	1	p3	(TAG)5	15	38	52	GACCCATCGTTATTAATTAAGCC	58.075	23	GGGCTTGTACGATGTCGTTT	60	20	261	0	260	GACCCATCGTTATTAATTAAGCCT	58.93	24	GGGCTTGTACGATGTCGTTT	60	20	261	0	260	GACCCATCGTTATTAATTAAGCC	58.075	23	TTCGATCTTTTGCCTCTGGT	59.813	20	206	0	205
F01_transcript_17365	1	p1	(A)10	10	37	46	CCAGTTTCTTCTCTTCTTGTTGC	59.573	23	TCGGAAAATGAGATCGAAGG	60.148	20	200	10	209	CCAGTTTCTTCTCTTCTTGTTGC	59.573	23	TGGTCTCTCCCTTCCATCAG	60.191	20	246	10	255	CCAGTTTCTTCTCTTCTTGTTGC	59.573	23	CCGCTGGAGCTAAGAGTTGT	59.639	20	128	10	137
F01_transcript_17366	1	p2	(AG)10	20	156	175	CATCTCTGCATCGGAAGGTT	60.218	20	GCGCAAAGAATTCAACCAAT	60.081	20	244	110	353	TCTGCATCGGAAGGTTTCTC	60.34	20	GCGCAAAGAATTCAACCAAT	60.081	20	240	114	353	TCTCTGCATCGGAAGGTTTC	60.34	20	GCGCAAAGAATTCAACCAAT	60.081	20	242	112	353
F01_transcript_17366	2	p1	(T)10	10	1524	1533	TGGACAAATCCTGGAGGAAG	60.042	20	CATTGCTCCTAAAGATCAAAATCA	59.644	24	156	1408	1563	GGGAAAGGGTAATCTGCCTC	59.903	20	CATTGCTCCTAAAGATCAAAATCA	59.644	24	225	1339	1563	CTCTTCAGAGCACCCCTGAG	60.127	20	CATTGCTCCTAAAGATCAAAATCA	59.644	24	208	1356	1563
F01_transcript_17381	1	p2	(AT)13	26	52	77	TCATCTTGTAGTTACAGTTTTTCATCA	58.447	27	AGCCCAGGAAAGAAAGGTGT	60.11	20	100	4	103	TCATCTTGTAGTTACAGTTTTTCATCA	58.447	27	TCTTAACCAAAGCCCAGGAA	59.679	20	110	4	113	TCATCTTGTAGTTACAGTTTTTCATCA	58.447	27	TAACCAAAGCCCAGGAAAGA	59.679	20	107	4	110
F01_transcript_17381	2	p2	(CT)6	12	1451	1462	TAGCCAATTTGCAGCAACAG	60.014	20	GAAGCTACTGCGTGCCTTTT	59.66	20	139	1363	1501	CTGCCCATGGAGAACAGTTT	60.111	20	GAAGCTACTGCGTGCCTTTT	59.66	20	239	1263	1501	TTCCATTTTACGGGTTTGGA	60.16	20	GAAGCTACTGCGTGCCTTTT	59.66	20	266	1236	1501
F01_transcript_17384	1	p1	(A)10	10	1589	1598	--
F01_transcript_17387	1	p3	(AGA)6	18	168	185	CGTTGTCTCGGTAAGTCGGT	60.171	20	GAAGCACGGTCCAGGAAATA	60.074	20	256	50	305	CGTTGTCTCGGTAAGTCGGT	60.171	20	CCTGCAACTTGGGCTATCAT	60.096	20	196	50	245	CGTTGTCTCGGTAAGTCGGT	60.171	20	ACTTCCTGCAACTTGGGCTA	59.875	20	200	50	249
F01_transcript_17395	1	p1	(T)10	10	920	929	CGCACAGCTCATGATTCACT	60.016	20	CTAAAACTGGATTGCCCAGC	59.708	20	260	703	962	CGCACAGCTCATGATTCACT	60.016	20	GATTGCCCAGCTTCAAAGAA	60.331	20	251	703	953	GAAAGGAATTGCGGTAAGCA	60.209	20	CTAAAACTGGATTGCCCAGC	59.708	20	212	751	962
F01_transcript_17395	2	p1	(T)10	10	1247	1256	CCAGGTAACCCTTGCTTGAA	60.103	20	AAGCTGAGCATGAAGTGCCT	60.164	20	188	1221	1408	CCAGGTAACCCTTGCTTGAA	60.103	20	CATGAAGTGCCTTCTGGACA	59.831	20	180	1221	1400	CCAGGTAACCCTTGCTTGAA	60.103	20	TACTTGCTGCAAACATCCCA	60.257	20	223	1221	1443
F01_transcript_17406	1	p3	(TCT)5	15	35	49	GGAGGAGGAACGTTGAGTTTT	59.607	21	TTGAAAGGGAGATGTGGGAG	60.042	20	275	0	274	GGAGGAGGAACGTTGAGTTTT	59.607	21	ATCGTGGAGTTGCCATTTTC	59.939	20	119	0	118	GGAGGAGGAACGTTGAGTTTT	59.607	21	GAATCGTGGAGTTGCCATTT	59.939	20	121	0	120
F01_transcript_17411	1	p2	(TC)8	16	46	61	GCCCATGCCATTTACATTTT	59.666	20	CCCATAGTACCTGGAGGCAA	59.948	20	206	7	212	GCCCATGCCATTTACATTTT	59.666	20	ACCTGGAGGCAAACCTTTCT	60.11	20	198	7	204	GCCCATGCCATTTACATTTT	59.666	20	AGTCCCAAAACCACACCAAG	59.861	20	128	7	134
F01_transcript_17418	1	p2	(CT)7	14	69	82	ATAGTTTGCGAAAGGGCAGA	59.845	20	CTCTTCTTTGGAGCACGACC	59.989	20	134	21	154	TCAATAGTTTGCGAAAGGGC	60.209	20	CTCTTCTTTGGAGCACGACC	59.989	20	137	18	154	ATAGTTTGCGAAAGGGCAGA	59.845	20	AGCACGACCAAACATTGTGA	60.16	20	123	21	143
F01_transcript_17422	1	c	(AC)8(AT)8	32	119	150	TTTGGGTTCGACCTTCACTC	60.088	20	CGGATCTCCAATAAGTCCGA	60.029	20	276	34	309	TTTGGGTTCGACCTTCACTC	60.088	20	AAAGGGTTTGGTTGTTGACG	59.869	20	185	34	218	CTCCGATCCGTTCTCTTCAC	59.803	20	CGGATCTCCAATAAGTCCGA	60.029	20	225	85	309
F01_transcript_17423	1	p2	(CT)11	22	92	113	AGCCTTCATCGTCGTCAGTT	59.874	20	AAACACCGATTTGGTTGGAA	60.206	20	204	1	204	CCTTCATCGTCGTCAGTTCA	59.831	20	AAACACCGATTTGGTTGGAA	60.206	20	202	3	204	GAGCCTTCATCGTCGTCAGT	60.418	20	AAACACCGATTTGGTTGGAA	60.206	20	205	0	204
F01_transcript_17426	1	c	(CT)9aggattgatataatccaaatgatcctgaaagcctcaaacttttgcttactcattacttcccctgcatatatgcacgtatacttgtaattt(TA)10	128	7	134	--
F01_transcript_17437	1	p3	(GTG)7	21	568	588	TGGGGTCAATTGCTGTGTTA	59.964	20	TCACCAACATCACTACCCGA	59.96	20	256	384	639	CGTTGAGGCTTTGGATTGTT	60.11	20	TCACCAACATCACTACCCGA	59.96	20	205	435	639	ATGCGGATGAGAGATTGGAG	60.181	20	CCGCCAGTAGAAACCCAATA	59.953	20	238	534	771
F01_transcript_17444	1	p5	(GGCAC)5	25	85	109	CGCAGACAAAGGTTAGACGA	59.072	20	AATCAGAAACCGGTCAATGG	59.79	20	154	55	208	TCGCAGACAAAGGTTAGACG	59.072	20	AATCAGAAACCGGTCAATGG	59.79	20	155	54	208	CTCAACTGTCGCTCCGTGT	60.038	19	AATCAGAAACCGGTCAATGG	59.79	20	179	30	208
F01_transcript_17451	1	p2	(GA)7	14	6	19	--
F01_transcript_17469	1	p2	(CG)6	12	65	76	ACGTTCTCACGACGCTTTTT	59.92	20	CTTGTTCGGATTTGGATTCG	60.439	20	256	34	289	AACGTTCTCACGACGCTTTT	59.92	20	CTTGTTCGGATTTGGATTCG	60.439	20	257	33	289	ACGTTCTCACGACGCTTTTT	59.92	20	GGTTGCAGAATATTCGGAGG	59.528	20	134	34	167
F01_transcript_17473	1	p3	(CAA)13	39	296	334	AGCAACAACAGCAACAGTGG	59.946	20	CCGATCCAGATCGTTTTGTT	59.933	20	280	113	392	GCAGCAGCAGTATCAACAGC	59.777	20	CCGATCCAGATCGTTTTGTT	59.933	20	252	141	392	GCCCTACCATTATCAGCAGC	59.696	20	TGACCAGACTGCTTATTGCG	60.011	20	240	255	494
F01_transcript_17476	1	p2	(TC)6	12	31	42	CTCCCTCTGTTTATTTTACACCA	57.399	23	AATCAGAAACCCGTCAATGG	59.79	20	204	4	207	CTCCCTCTGTTTATTTTACACCA	57.399	23	TCGAGAAAATGGATGCTCCT	59.773	20	236	4	239	ACTCCCTCTGTTTATTTTACACCA	58.212	24	AATCAGAAACCCGTCAATGG	59.79	20	205	3	207
F01_transcript_17486	1	p2	(TC)18	36	57	92	TTCATGCTCTTTGCCTTCCT	59.955	20	GGTGACCCTGCACCTACAGT	60.033	20	108	27	134	TTCATTTCCCATCCGTTCAT	60.133	20	GGTGACCCTGCACCTACAGT	60.033	20	123	12	134	GTTCATGCTCTTTGCCTTCC	59.82	20	GGTGACCCTGCACCTACAGT	60.033	20	109	26	134
F01_transcript_17486	2	p3	(CTT)8	24	395	418	ATCCGAATTCAAGGAAGCCT	60.039	20	CTCCTAAGGAACTTGCACGC	60.015	20	216	251	466	TCCGAATTCAAGGAAGCCTA	59.778	20	CTCCTAAGGAACTTGCACGC	60.015	20	215	252	466	ATCCGAATTCAAGGAAGCCT	60.039	20	GGTGCAAATATGCAACCTGA	59.548	20	246	251	496
F01_transcript_17486	3	p2	(TA)27	54	1448	1501	TTTCAAGAGAGGGCCACCTA	59.807	20	ATGCCTCCAGAGAGAGACGA	60.096	20	225	1316	1540	TTTCAAGAGAGGGCCACCTA	59.807	20	TGCCTCCAGAGAGAGACGAT	60.096	20	224	1316	1539	TTTCAAGAGAGGGCCACCTA	59.807	20	ACCTTCAAATTGGGCGTGTA	60.365	20	279	1316	1594
F01_transcript_17501	1	p1	(A)10	10	1414	1423	TGACTGCCAACTCTACAGGG	58.879	20	CTTGCAAAGCTTGCTCATACA	59.264	21	271	1250	1520	TGACTGCCAACTCTACAGGG	58.879	20	TTGCAAAGCTTGCTCATACA	58.229	20	270	1250	1519	TTGACTGCCAACTCTACAGGG	60.297	21	CTTGCAAAGCTTGCTCATACA	59.264	21	272	1249	1520
F01_transcript_17503	1	p3	(GCC)6	18	177	194	CACACGCCTCCTCTTCTTCT	59.598	20	ACAAGACCAGCACGATCCTC	60.269	20	200	26	225	CACACGCCTCCTCTTCTTCT	59.598	20	AGGGCATTTACAAGACCAGC	59.198	20	209	26	234	CACACGCCTCCTCTTCTTCT	59.598	20	TCAGGGCATTTACAAGACCA	59.123	20	211	26	236
F01_transcript_17505	1	p1	(T)10	10	609	618	TGCCAAGTCTTCAAAACTGC	59.05	20	TTAACTTCCTCAGCAGGCGT	60.015	20	276	577	852	TGCCAAGTCTTCAAAACTGC	59.05	20	TAACTTCCTCAGCAGGCGTT	60.015	20	275	577	851	TGCCAAGTCTTCAAAACTGC	59.05	20	GCAAACCCGTAAAATAGGCA	59.964	20	173	577	749
F01_transcript_17506	1	p6	(CACCTC)8	48	304	351	AAGTCCCCCTCCTCAAAGAA	60.045	20	TTCACATTCCTGGTGAGCTG	59.831	20	192	250	441	CGCTCCAAATCCTTCACTTC	59.813	20	TTTCCTTGGAGGTGGAGTTG	60.081	20	192	191	382	AAGTCCCCCTCCTCAAAGAA	60.045	20	ATTATGATCCATTGCCAGCC	59.751	20	265	250	514
F01_transcript_17513	1	c	(TA)9tc(CT)12	44	89	132	AAGCAAAGAGCAGGACCAAA	59.993	20	GCACCCATTTTTCAGTGACC	60.362	20	209	23	231	AAGCAAAGAGCAGGACCAAA	59.993	20	GGCACCCATTTTTCAGTGAC	60.362	20	210	23	232	AAGCAAAGAGCAGGACCAAA	59.993	20	CCCATTTTTCAGTGACCTGC	60.495	20	206	23	228
F01_transcript_17515	1	p1	(C)14	14	1518	1531	CGAGGCATTTTGGAGATGAT	60.036	20	TTTAAGAGCCACCATAGGGAA	58.705	21	171	1385	1555	CGAGGCATTTTGGAGATGAT	60.036	20	CATTTAAGAGCCACCATAGGGA	60.324	22	173	1385	1557	GGAACCACTTGGCCTATTCA	59.933	20	TTTAAGAGCCACCATAGGGAA	58.705	21	228	1328	1555
F01_transcript_17519	1	p1	(T)10	10	366	375	TCCTGAAGAGGGGTTTTCAA	59.641	20	CGATTCCAACCTTCTCCAAA	60.044	20	164	295	458	TCCTGAAGAGGGGTTTTCAA	59.641	20	ACATTCTTGGCGATTCCAAC	59.939	20	174	295	468	TCCTGAAGAGGGGTTTTCAA	59.641	20	ATTTCCGTGACATTCTTGGC	59.939	20	183	295	477
F01_transcript_17526	1	p3	(GTG)5	15	1235	1249	AAAAGCTTGCACTGGAGCAT	60.022	20	CAGCATACCACCAGAGTTGG	59.161	20	241	1138	1378	AAAAGCTTGCACTGGAGCAT	60.022	20	CACCAGAGTTGGTGACAAGG	59.148	20	233	1138	1370	AAAAGCTTGCACTGGAGCAT	60.022	20	CCACCAGAGTTGGTGACAAG	59.148	20	234	1138	1371
F01_transcript_17554	1	p1	(T)10	10	1387	1396	ACATGGAGAGCCCATCAAAC	59.934	20	GGGAAGAAGTGGGTAGGAGG	59.928	20	207	1250	1456	ACATGGAGAGCCCATCAAAC	59.934	20	GGAAGAAGTGGGTAGGAGGG	59.928	20	206	1250	1455	TTGGAAAACAAGCACATGGA	60.088	20	GGAAGAAGTGGGTAGGAGGG	59.928	20	219	1237	1455
F01_transcript_17556	1	p2	(TC)6	12	36	47	CAATTTCAGTGATCCCCAGG	60.309	20	AACTCAAAGCGCCAATTGTT	59.752	20	246	12	257	CAATTTCAGTGATCCCCAGG	60.309	20	ACTCAAAGCGCCAATTGTTC	60.257	20	245	12	256	CAATTTCAGTGATCCCCAGG	60.309	20	TCCCTCTCTGGCTGTAGCTC	59.703	20	183	12	194
F01_transcript_17564	1	p2	(AG)6	12	658	669	GAAGGAGAAAGCTCGCAAAA	59.708	20	CCAAGCTTGCGTCTTCTTTC	60.132	20	237	608	844	GAAGGAGAAAGCTCGCAAAA	59.708	20	TCCAAGCTTGCGTCTTCTTT	60.132	20	238	608	845	ACTGAAGGAGAAAGCTCGCA	60.277	20	GCAGCTGGCTTTTCAGACTT	59.763	20	279	605	883
F01_transcript_17566	1	p3	(GTA)5	15	448	462	CACTCAAGGAAGGAATGGGA	60.042	20	TTGATCCCTTACCCTTGCAC	59.933	20	249	351	599	CACTCAAGGAAGGAATGGGA	60.042	20	AACATGTCATCGATGCTCCA	60.08	20	273	351	623	GGAGCTTGCTCAGGCTTATG	60.118	20	ACAACATCCTCCCCTCTCCT	59.929	20	219	277	495
F01_transcript_17569	1	p3	(CCA)6	18	94	111	TTCCGGCAATCTCAGTCTCT	59.95	20	CACATGGAGGGAGAGGACAT	59.92	20	272	45	316	TTCCGGCAATCTCAGTCTCT	59.95	20	CGGCTAGGTGAGTGATGGTT	60.134	20	153	45	197	TTCCGGCAATCTCAGTCTCT	59.95	20	GAAGGTTGAGAATTCGGGGT	60.306	20	122	45	166
F01_transcript_17579	1	p1	(T)15	15	1422	1436	AAGTTTAGGCCGGAGGGAT	59.911	19	TTCCCTTCCCTTCTCTCCTC	59.749	20	127	1339	1465	AAAGTTTAGGCCGGAGGGAT	61.142	20	TTCCCTTCCCTTCTCTCCTC	59.749	20	128	1338	1465	AAGTTTAGGCCGGAGGGAT	59.911	19	TTTCCCTTCCCTTCTCTCCT	59.252	20	128	1339	1466
F01_transcript_17587	1	p3	(CGC)7	21	130	150	ACAATAATGTCCTCCGCCAC	59.82	20	GGGTTAAGGTTTGTGGGGTT	59.955	20	197	100	296	GAAAATCCGACAAAACCCAA	59.778	20	GCGGAGGAGAGGAGAGAGAT	60.058	20	137	76	212	ACAATAATGTCCTCCGCCAC	59.82	20	TCCGGAGGAGAGAGAAATGA	59.879	20	272	100	371
F01_transcript_17594	1	p1	(T)11	11	77	87	TAAGTGGGTCTCCCTTCCCT	59.928	20	TCAAAGACGGATGATATGGAAA	59.411	22	114	15	128	TAAGTGGGTCTCCCTTCCCT	59.928	20	TTTCAAAGACGGATGATATGGA	59.411	22	116	15	130	TAAGTGGGTCTCCCTTCCCT	59.928	20	TTCAAAGACGGATGATATGGA	58.024	21	115	15	129
F01_transcript_17594	2	p3	(CAA)8	24	1322	1345	CAAATTTTGTGTCGGCAATG	59.969	20	AACCAGCCATGAATTGAAGC	60.081	20	252	1159	1410	TCAATGTAACAGGAAGGCCC	59.933	20	AACCAGCCATGAATTGAAGC	60.081	20	276	1135	1410	CAAATTTTGTGTCGGCAATG	59.969	20	GTGTTCGATCAGTGGCAGAA	59.837	20	270	1159	1428
F01_transcript_17604	1	p2	(TC)6	12	180	191	CCCCACGTCGTCTTTACCTA	59.986	20	GGGAAACATTGGTCGATTTG	60.17	20	238	127	364	CCATCCTCTCCATCTCTCCA	60.152	20	CCAACGGTTTAAGGGAAACA	59.833	20	228	149	376	CCATCCTCTCCATCTCTCCA	60.152	20	CACCAACGGTTTAAGGGAAA	59.833	20	230	149	378
F01_transcript_17610	1	p1	(T)10	10	1514	1523	GCTGTCCCAATACACCTGCT	60.142	20	CTCAATTCCACTGACTTCTTGA	57.053	22	127	1464	1590	GCTGTCCCAATACACCTGCT	60.142	20	ACTCAATTCCACTGACTTCTTGA	57.977	23	128	1464	1591	AGATTGTGACCGCCGTAGAG	60.277	20	CTCAATTCCACTGACTTCTTGA	57.053	22	194	1397	1590
F01_transcript_17617	1	p5	(ACCCC)6	30	1430	1459	CCAACGAAGGGTATAACCGA	59.817	20	CACCCTTGGGCTCAATAAAC	59.429	20	273	1313	1585	CCAACGAAGGGTATAACCGA	59.817	20	ACCACCCTTGGGCTCAATA	60.324	19	275	1313	1587	CCAACGAAGGGTATAACCGA	59.817	20	CACCCTTGGGCTCAATAAACT	60.359	21	273	1313	1585
F01_transcript_17623	1	p2	(AG)10	20	41	60	GGCATCGGAAGGTTTCTCTT	60.578	20	TACAATGACCACACCAAGGC	59.42	20	256	1	256	GGCATCGGAAGGTTTCTCTT	60.578	20	CACTTGTACCAAGCACGAGG	59.36	20	130	1	130	GCATCGGAAGGTTTCTCTTCT	59.841	21	GCGCAAAGAATTCAACCAAT	60.081	20	237	2	238
F01_transcript_17623	2	p1	(T)10	10	1409	1418	ACTTATGGGCGAAGAAAGCA	59.845	20	GGCAAAGTGAGAGTCGTTTTC	58.972	21	264	1332	1595	ACTTATGGGCGAAGAAAGCA	59.845	20	GCAAAGTGAGAGTCGTTTTCC	58.972	21	263	1332	1594	ACTTATGGGCGAAGAAAGCA	59.845	20	AAAGTGAGAGTCGTTTTCCCAA	60.144	22	261	1332	1592
F01_transcript_17638	1	p2	(AT)6	12	53	64	CTCAGCATAGCAGCAACGAA	60.302	20	TGTCCCTAGCCACTAAACCG	60.125	20	147	2	148	ATAGCAGCAACGAATGCCTC	60.382	20	TGTCCCTAGCCACTAAACCG	60.125	20	141	8	148	TCAGCATAGCAGCAACGAAT	59.596	20	TGTCCCTAGCCACTAAACCG	60.125	20	146	3	148
F01_transcript_17641	1	p2	(TC)7	14	36	49	GGCCGCCTCATACTTTTT	57.763	18	TCTTGTCGGGACAATTCACA	60.088	20	279	0	278	GGCCGCCTCATACTTTTT	57.763	18	AATGTACAATTTGGCGGAGG	59.823	20	152	0	151	GGCCGCCTCATACTTTTT	57.763	18	GAGTTGGTTGGTTGGATTGG	60.21	20	111	0	110
F01_transcript_17650	1	p1	(T)10	10	1561	1570	AAAGGCCAACTGCAAAAGAA	59.861	20	GCTTGTCTGGGACACCAAAA	61.075	20	278	1318	1595	GAAGCAATGGCTCATCCCTA	60.177	20	GCTTGTCTGGGACACCAAAA	61.075	20	261	1335	1595	GAAGCAATGGCTCATCCCTA	60.177	20	TTCTTGCTTGTCTGGGACAC	58.854	20	266	1335	1600
F01_transcript_17658	1	p3	(GAA)5	15	335	349	GAGGAGGTGTTGTCCCAGAA	60.088	20	GGCTTGCCGACTACAGCTAC	60.044	20	257	280	536	GAGGAGGTGTTGTCCCAGAA	60.088	20	TACGATGGTTAGGGTCGAGG	59.948	20	229	280	508	GAGGAGGTGTTGTCCCAGAA	60.088	20	ACATTTGGCTTGCCGACTAC	60.14	20	263	280	542
F01_transcript_17671	1	p2	(TC)6	12	18	29	--
F01_transcript_17673	1	p3	(CAG)6	18	1219	1236	CAGAAGAGAATGATGGGCGT	60.218	20	CTGACATGTGAGGCCCTTTT	60.111	20	244	1162	1405	CAGAAGAGAATGATGGGCGT	60.218	20	GTGAGGCCCTTTTTATGTGC	59.574	20	237	1162	1398	CAGAAGAGAATGATGGGCGT	60.218	20	TGACATGTGAGGCCCTTTTT	60.495	20	243	1162	1404
F01_transcript_17682	1	p1	(T)10	10	1298	1307	TGTTATTGCACGGTCTTCCA	60.111	20	CAGGGAGTATATGTTTTTCAACCC	60.007	24	114	1274	1387	TGTTATTGCACGGTCTTCCA	60.111	20	CAAATGGCATTGAATTTCTACTCA	60.355	24	141	1274	1414	GGAACTCCAATTGTGAAGGC	59.532	20	CAGGGAGTATATGTTTTTCAACCC	60.007	24	257	1131	1387
F01_transcript_17684	1	c	(TC)10(TA)11	42	141	182	CATCGCCACTGCTCAATCTA	59.972	20	ACTCCCCCTCTATTCCAAGC	59.536	20	276	97	372	CATCGCCACTGCTCAATCTA	59.972	20	TCCCCCTCTATTCCAAGCTC	60.537	20	274	97	370	CATCGCCACTGCTCAATCTA	59.972	20	CCCTCTATTCCAAGCTCCAA	59.264	20	271	97	367
F01_transcript_17684	2	p1	(A)10	10	1008	1017	TTTCACAGAGGTCTTGGTTCA	58.328	21	TCCATGCATGCCTACACAAC	60.549	20	276	984	1259	TTTCACAGAGGTCTTGGTTCA	58.328	21	GTCCATGCATGCCTACACAA	60.549	20	277	984	1260	TTTCACAGAGGTCTTGGTTCA	58.328	21	CATGCATGCCTACACAACAA	59.151	20	274	984	1257
F01_transcript_17690	1	p2	(AT)7	14	623	636	AAAAAGTTGGGTGCTGCC	58.697	18	TCAAAGAGGGATTTTTGCGT	59.685	20	220	601	820	AAAAAGTTGGGTGCTGCC	58.697	18	GTCAAAGAGGGATTTTTGCG	59.685	20	221	601	821	AAAAAGTTGGGTGCTGCC	58.697	18	TCAAAGAGGGATTTTTGCGTA	59.707	21	220	601	820
F01_transcript_17696	1	p3	(TGA)5	15	277	291	CAAGTGCCGGGTATAAAGGA	59.953	20	ATGCACCCAGGTAAACTTGC	60	20	265	248	512	TGCCGGGTATAAAGGATCAG	59.916	20	ATGCACCCAGGTAAACTTGC	60	20	261	252	512	TGCCGGGTATAAAGGATCAG	59.916	20	TCCATCTATGCCTGGTGACA	60.072	20	174	252	425
F01_transcript_17699	1	p2	(CT)13	26	36	61	TCAAACACGATCTCAGTCACCT	59.769	22	CTCAGGCGTAGAATCGGAAG	59.971	20	219	9	227	TCAAACACGATCTCAGTCACCT	59.769	22	ACTGACACAGCAGCACCAAC	59.948	20	263	9	271	TCAAACACGATCTCAGTCACCT	59.769	22	AACACTGACACAGCAGCACC	59.948	20	266	9	274
F01_transcript_17704	1	p1	(T)10	10	1555	1564	ATGCCTGGGGACAATGTAAC	59.676	20	TGTTTCGCTTTTCCTAGCGT	60.018	20	217	1396	1612	GGTTCCTCTTGATGCAGGAC	59.661	20	TGTTTCGCTTTTCCTAGCGT	60.018	20	173	1440	1612	GATCACTCCGGTTCCTCTTG	59.655	20	TGTTTCGCTTTTCCTAGCGT	60.018	20	182	1431	1612
F01_transcript_17712	1	c	(ATT)9tcttctatgtcccttatttgtcatttga(T)10	65	1360	1424	TTCATGAAGGATTTCCAGGC	60.014	20	CAAGTGCTAAAAGCCACAAATG	59.816	22	156	1300	1455	CCAAGGAGAAGATGGAGCAG	59.943	20	CAAGTGCTAAAAGCCACAAATG	59.816	22	260	1196	1455	GATCGCATTTCCGTTTTGAT	59.907	20	CAAGTGCTAAAAGCCACAAATG	59.816	22	125	1331	1455
F01_transcript_17745	1	p1	(A)15	15	91	105	CACGGATTGTGCAAGAGAGA	59.984	20	GAGGAAGATCGATTCCCACA	60.011	20	112	31	142	GTGAGCGAATCGAGAGGAAC	59.957	20	GAGGAAGATCGATTCCCACA	60.011	20	136	7	142	AGCGAATCGAGAGGAACAAA	59.955	20	GAGGAAGATCGATTCCCACA	60.011	20	133	10	142
F01_transcript_17755	1	p6	(CAGTAC)6	36	1473	1508	TGCAGCTAGCGCAGCTATT	60.036	19	GGGGGCAGAAAACATCAACT	61.249	20	145	1444	1588	TGCAGCTAGCGCAGCTATT	60.036	19	GGGGGCAGAAAACATCAAC	60.31	19	145	1444	1588	GCTAGCGCAGCTATTGATTTG	60.15	21	GGGGGCAGAAAACATCAACT	61.249	20	141	1448	1588
F01_transcript_17756	1	p2	(AT)16	32	158	189	ACACACAGACCACCAAACCA	59.89	20	TGTTGTTCGGATTGGAGTGA	60.088	20	190	24	213	ACACACAGACCACCAAACCA	59.89	20	TGGGAATTTGTTGTTCGGAT	60.17	20	198	24	221	ACACACAGACCACCAAACCA	59.89	20	AAAGGGAGGGGGAGAGATTT	60.256	20	273	24	296
F01_transcript_17758	1	p2	(AT)25	50	1323	1372	CCTTTTTCAAAACCCACCAA	59.811	20	AGCTGCTTCTTGCTTGCTTC	60.044	20	276	1278	1553	CCTTTTTCAAAACCCACCAA	59.811	20	TGCTAGCTGCTTCTTGCTTG	59.656	20	280	1278	1557	CCTTTTTCAAAACCCACCAA	59.811	20	GCTAGCTGCTTCTTGCTTGC	60.573	20	279	1278	1556
F01_transcript_17762	1	c	(CA)12(TA)6	36	120	155	GGGTTCGACCATCACTCACT	59.969	20	AGGGGAAGAGGATGATACGG	60.285	20	278	37	314	GGGTTCGACCATCACTCACT	59.969	20	ATGGTGTGACGACAACAACG	60.487	20	195	37	231	GGGTTCGACCATCACTCACT	59.969	20	TGATGATGGTGTGACGACAA	59.492	20	200	37	236
F01_transcript_17764	1	p1	(A)10	10	1583	1592	--
F01_transcript_17778	1	p3	(CTC)5	15	585	599	CTCCTCGATTTGTCCCGTAA	60.066	20	GGATAAGTCCTGGGTGGGAT	60.015	20	173	496	668	GCGATCCCCCTCTATACTCC	59.888	20	GGATAAGTCCTGGGTGGGAT	60.015	20	133	536	668	AACCCTTCCGGTATGGTCTC	60.19	20	GGATAAGTCCTGGGTGGGAT	60.015	20	233	436	668
F01_transcript_17779	1	p2	(GA)8	16	70	85	GGGAAAGGAGAGAGAGACAGAG	58.69	22	TGTGAAGGAGTTAGGGTCCG	60.103	20	173	33	205	AGGGAAAGGAGAGAGAGACAGA	58.69	22	TGTGAAGGAGTTAGGGTCCG	60.103	20	174	32	205	GGGAAAGGAGAGAGAGACAGAG	58.69	22	AAAGCCAGCCTTTTGTGAAA	59.861	20	242	33	274
F01_transcript_17779	2	p1	(T)10	10	1565	1574	--
F01_transcript_17780	1	p2	(AG)12	24	4	27	--
F01_transcript_17805	1	p1	(T)12	12	1354	1365	GAAGCATAAGACTCCGCCTG	59.978	20	GCCACACACTGAAAAATCCA	59.547	20	279	1176	1454	CAGACGGCTGATGAGAATGA	59.942	20	GCCACACACTGAAAAATCCA	59.547	20	206	1249	1454	TCAGACGGCTGATGAGAATG	59.942	20	GCCACACACTGAAAAATCCA	59.547	20	207	1248	1454
F01_transcript_17806	1	p2	(TC)7	14	1390	1403	GCCAAGCCTGCAAAGATTAG	59.982	20	GGAACAACAGTTGAAGCAAGC	59.912	21	247	1342	1588	AGCCAAGCCTGCAAAGATTA	59.982	20	GGAACAACAGTTGAAGCAAGC	59.912	21	248	1341	1588	CAAGCCTGCAAAGATTAGGG	59.839	20	GGAACAACAGTTGAAGCAAGC	59.912	21	245	1344	1588
F01_transcript_17809	1	p3	(ATC)5	15	296	310	GGAGATCAGCTGCCTTCAAC	59.957	20	TTTCGTGCTCGGATTCTTCT	59.955	20	273	103	375	GGAGATCAGCTGCCTTCAAC	59.957	20	TTCGTGCTCGGATTCTTCTT	59.955	20	272	103	374	GGAGATCAGCTGCCTTCAAC	59.957	20	GTTTCGTGCTCGGATTCTTC	59.82	20	274	103	376
F01_transcript_17809	2	p3	(GAA)11	33	565	597	TCTCTCCACATAGGGTTGCC	60.073	20	CCTATTGAAGGCCTTGTTGC	59.708	20	255	483	737	TCTCTCCACATAGGGTTGCC	60.073	20	ATCTGAGCTGGTGTTGGGAT	59.535	20	200	483	682	TCTCTCCACATAGGGTTGCC	60.073	20	TATCTGAGCTGGTGTTGGGA	59.241	20	201	483	683
F01_transcript_17813	1	p3	(AAG)5	15	114	128	TCGGTGATTGCTGGTTAAGA	59.272	20	TTACAAGCTTGGCAACACCA	60.293	20	251	9	259	TCGGTGATTGCTGGTTAAGA	59.272	20	TACAAGCTTGGCAACACCAA	60.293	20	250	9	258	TCGGTGATTGCTGGTTAAGA	59.272	20	CTTGGCAACACCAAAATTCC	60.344	20	244	9	252
F01_transcript_17831	1	p3	(GAA)5	15	299	313	AAGGACCCAGAAGCCGTAAT	59.962	20	TTGTATTCCACTTCCTCGCC	60.074	20	278	146	423	AGATGGAGCAGCCAAGAAGA	60.096	20	AGTCATTATTCACGCGGTCC	59.962	20	221	268	488	AGATGGAGCAGCCAAGAAGA	60.096	20	TTGTATTCCACTTCCTCGCC	60.074	20	156	268	423
F01_transcript_17832	1	p1	(T)14	14	55	68	GCGATTTAGAGAAGAGGGAGG	59.451	21	GCCTGGCATTAAGCTCTTTG	59.982	20	184	0	183	GCGATTTAGAGAAGAGGGAGG	59.451	21	TGCCTGGCATTAAGCTCTTT	59.982	20	185	0	184	GCGATTTAGAGAAGAGGGAGG	59.451	21	TGGTGACTGATTTGCTTTGC	59.847	20	142	0	141
F01_transcript_17834	1	p1	(T)11	11	1321	1331	TCCTGCAGTTAACACTCCCC	60.111	20	AACTCTTCATCCAAAATCCAGC	59.598	22	251	1198	1448	TGCAGTTAACACTCCCCACA	60.152	20	AACTCTTCATCCAAAATCCAGC	59.598	22	248	1201	1448	TCCTGCAGTTAACACTCCCC	60.111	20	TCATCCAAAATCCAGCTATTGA	59.547	22	245	1198	1442
F01_transcript_17838	1	p2	(CT)6	12	57	68	GGCCCTTTCCTACCATCTCT	59.536	20	GGGTTTGTAAGGGTTTGGGT	59.955	20	109	0	108	GGCCCTTTCCTACCATCTCT	59.536	20	AGGGTTTGTAAGGGTTTGGG	60.082	20	110	0	109	GGCCCTTTCCTACCATCTCT	59.536	20	TCTTCAACACGCCGTTACTG	59.904	20	234	0	233
F01_transcript_17849	1	p1	(C)21	21	97	117	GCCAGCCTATATGGGGATTT	60.137	20	GGGTTAGGGTTTCCGATTGT	60.053	20	264	42	305	GCCAGCCTATATGGGGATTT	60.137	20	TAGGCGAAATTAACGATGGC	60.061	20	160	42	201	TATGGGGATTTAGCTGAGCG	60.188	20	GGGTTAGGGTTTCCGATTGT	60.053	20	255	51	305
F01_transcript_17853	1	p1	(T)10	10	1236	1245	TATGATTCTGGCCTGGGTTC	59.894	20	GCACTGCAGAACCAAATGAA	59.847	20	172	1115	1286	TATGATTCTGGCCTGGGTTC	59.894	20	ACACGCTTCCTCTGTCTGCT	60.205	20	231	1115	1345	TATGATTCTGGCCTGGGTTC	59.894	20	ATGCACTGCAGAACCAAATG	59.722	20	174	1115	1288
F01_transcript_17869	1	p1	(A)10	10	1483	1492	AAGGCCTTGCATTCTACCTG	59.336	20	TTTGGAGGCTGAATTACATGA	58.227	21	115	1432	1546	GGGGATTTGAACCCTCTGTC	60.693	20	TTTGGAGGCTGAATTACATGA	58.227	21	144	1403	1546	AAGGCCTTGCATTCTACCTG	59.336	20	TTCATATCAAATTTGGAGGCTG	59.078	22	126	1432	1557
F01_transcript_17891	1	p3	(CAC)6	18	511	528	TCACTCTCCTCTGCCACCTT	59.986	20	GCGGTGGTGGAGACTTGTAT	59.997	20	218	478	695	TTCACTCTCCTCTGCCACCT	59.986	20	GCGGTGGTGGAGACTTGTAT	59.997	20	219	477	695	CTCCGGTTCACTCTCCTCTG	59.978	20	GCGGTGGTGGAGACTTGTAT	59.997	20	225	471	695
F01_transcript_17891	2	p3	(CCT)5	15	1215	1229	ATACAAGTCTCCACCGCCAC	59.997	20	TTGGCAGTTCTCCTTTCCTG	60.366	20	209	1072	1280	TCTCCACCTCCACCTACACC	59.962	20	TTGGCAGTTCTCCTTTCCTG	60.366	20	166	1115	1280	TCTCCACCTCCACCTACACC	59.962	20	CATGCATTGATTCTGCTTGC	60.375	20	249	1115	1363
F01_transcript_17891	3	p2	(AT)20	40	1444	1483	AACTACTTGGCCCTATCGCA	59.73	20	GAGATCAGAACCTTCCCACAA	59.126	21	267	1243	1509	CAGGAAAGGAGAACTGCCAA	60.366	20	GAGATCAGAACCTTCCCACAA	59.126	21	249	1261	1509	AACTACTTGGCCCTATCGCA	59.73	20	AGAGATCAGAACCTTCCCACAA	60.11	22	268	1243	1510
F01_transcript_17894	1	p2	(TA)7	14	107	120	CGCCGGTCTTATTTCTACCA	60.089	20	GGATTCCTTTTCTCCTTCCG	60.011	20	157	47	203	CGCCGGTCTTATTTCTACCA	60.089	20	CGAAGGGGATTCCTTTTCTC	60.011	20	163	47	209	CGCCGGTCTTATTTCTACCA	60.089	20	TGACTTGGTCTCGGAACCTC	60.238	20	189	47	235
F01_transcript_17907	1	c	(AT)10(AG)9	38	82	119	AGAGAGAGAAAGTCGCAGTTCC	59.277	22	CGCGTAGGTTCAGAACAACA	59.904	20	160	23	182	GAGAGAGAAAGTCGCAGTTCC	58.269	21	CGCGTAGGTTCAGAACAACA	59.904	20	159	24	182	GAAGTGAGAGAGAGAAAGTCGCA	60.316	23	CGCGTAGGTTCAGAACAACA	59.904	20	166	17	182
F01_transcript_17908	1	c	(AGA)7(CGA)6	39	154	192	ATCAATGGCGAAGAAGAGGA	59.773	20	TTCTCCTCCTTGTGATTCCG	60.187	20	157	60	216	CAATGGCGAAGAAGAGGAAA	60.323	20	TTCTCCTCCTTGTGATTCCG	60.187	20	155	62	216	AATCAATGGCGAAGAAGAGG	59.269	20	TTCTCCTCCTTGTGATTCCG	60.187	20	158	59	216
F01_transcript_17911	1	p2	(AG)8	16	82	97	GTCGTTGGCTGCTGATACAA	59.871	20	AGAGCAGTAAACGCTGCCTC	59.786	20	141	25	165	GTCGTTGGCTGCTGATACAA	59.871	20	GAGAGCAGTAAACGCTGCCT	59.786	20	142	25	166	TGGCTGCTGATACAAATCCA	60.22	20	AGAGCAGTAAACGCTGCCTC	59.786	20	136	30	165
F01_transcript_17911	2	p3	(TTC)5	15	1394	1408	AGACAGGGTTGTTTGGCATC	59.973	20	CATTTTGGACTCTGCTGCAA	59.988	20	156	1285	1440	GAGACAGGGTTGTTTGGCAT	59.973	20	CATTTTGGACTCTGCTGCAA	59.988	20	157	1284	1440	CTGAATGGGTGAGACAGGGT	59.962	20	CATTTTGGACTCTGCTGCAA	59.988	20	167	1274	1440
F01_transcript_17919	1	p3	(CAG)6	18	99	116	AAAGAGGCGCAGAGCAATAC	59.62	20	TCTGCTGTTGAATTTGCTGC	60.142	20	186	6	191	ATAACAAAGAGGCGCAGAGC	59.62	20	TCTGCTGTTGAATTTGCTGC	60.142	20	191	1	191	AAAGAGGCGCAGAGCAATAC	59.62	20	ATGGCAAGTTGCTGTTGTTG	59.764	20	211	6	216
F01_transcript_17919	2	p6	(CAACAG)5	30	291	320	CCAACATCGACGCTCATTTA	59.688	20	AGGGTTTTGCTGTTGATTGG	59.971	20	158	231	388	CCAACATCGACGCTCATTTA	59.688	20	ATACGCCATTTGTAGCTCCG	60.117	20	230	231	460	CCAACATCGACGCTCATTTA	59.688	20	GAAGAGAAAGGGCGTTTGTG	59.853	20	280	231	510
F01_transcript_17919	3	p1	(T)10	10	1542	1551	--
F01_transcript_17926	1	p1	(T)10	10	1360	1369	TATGCAGACAGCCAGTGGAG	60.008	20	TGCAGGAGAGAGGGAGGTAA	59.943	20	183	1227	1409	CAGTGGAGAGGCTTTTGGAG	59.982	20	TGCAGGAGAGAGGGAGGTAA	59.943	20	171	1239	1409	CTGCTTTGTCCGTGCTGTAA	60.05	20	TGCAGGAGAGAGGGAGGTAA	59.943	20	106	1304	1409
F01_transcript_17932	1	p3	(GAG)6	18	1083	1100	GGAAGCTGCAAGATGTGTCA	59.992	20	ATGCTCATCATCCCTGGACT	59.491	20	265	973	1237	GGAAGCTGCAAGATGTGTCA	59.992	20	TGCTCATCATCCCTGGACTT	60.622	20	264	973	1236	TGAGGAAGCTGCAAGATGTG	60.136	20	ATGCTCATCATCCCTGGACT	59.491	20	268	970	1237
F01_transcript_17932	2	p3	(ATG)7	21	1255	1275	GTGCTGATGAGGAGGAGGAG	59.945	20	CCACATTGCTTTGTTTTCCC	60.344	20	249	1074	1322	AGTGCTGATGAGGAGGAGGA	59.945	20	CCACATTGCTTTGTTTTCCC	60.344	20	250	1073	1322	AGGAGCAGCAGCAGCATATT	60.147	20	CTTGCCAGTTTGGCTTGTTT	60.284	20	272	1095	1366
F01_transcript_17933	1	p2	(GA)6	12	44	55	CCTAACAACAAATAAGACCAGCAA	59.613	24	CCCTCACTGGTAACAGGCAT	59.989	20	124	9	132	CCTAACAACAAATAAGACCAGCAA	59.613	24	GAATGAGGGAACGATCGAAA	60.014	20	243	9	251	CCTAACAACAAATAAGACCAGCAA	59.613	24	AAATGGAGGTTTTTCATGCG	59.938	20	185	9	193
F01_transcript_17936	1	p4	(CATC)6	24	18	41	--
F01_transcript_17938	1	c	(TA)8(GA)8a(AG)7	47	139	185	AAAATTGTTGATCTTGCCCG	59.938	20	CTTTTCATGCACTGGCTCAA	59.988	20	171	41	211	AAAATTGTTGATCTTGCCCG	59.938	20	TTTCATGCACTGGCTCAAAC	59.847	20	169	41	209	AATTGTTGATCTTGCCCGAA	60.448	20	CTTTTCATGCACTGGCTCAA	59.988	20	169	43	211
F01_transcript_17938	2	p2	(TA)25	50	1144	1193	AATGCCCACCCAATTCTGTA	60.192	20	TCGCACACTCTCATTCAACA	58.95	20	187	1067	1253	GGAAGAGGAGGTGACACCAG	59.682	20	TCGCACACTCTCATTCAACA	58.95	20	216	1038	1253	TGAGTTGTGGGAGGGACAAT	60.363	20	TCGCACACTCTCATTCAACA	58.95	20	250	1004	1253
F01_transcript_17940	1	p3	(CCA)8	24	524	547	TTGATTCCGATCAATCCCTC	59.831	20	TTGGAGAATAGTGGCCGAAC	60.074	20	269	381	649	TCTTGATTCCGATCAATCCC	59.831	20	TTGGAGAATAGTGGCCGAAC	60.074	20	271	379	649	TCTTGATTCCGATCAATCCC	59.831	20	GTTGGAGAATAGTGGCCGAA	60.074	20	272	379	650
F01_transcript_17943	1	p2	(GA)6	12	683	694	AGCGGACAGAAGGGGTATCT	60.096	20	GGCTATGACCATGGCTGAAC	60.492	20	128	627	754	AGCGGACAGAAGGGGTATCT	60.096	20	TGAGAAATGCGTGTTCCACT	59.293	20	174	627	800	AGCGGACAGAAGGGGTATCT	60.096	20	GAGAAATGCGTGTTCCACTG	59.293	20	173	627	799
F01_transcript_17971	1	p1	(T)14	14	1391	1404	TTGTTGGCTCTCAGCTTGAA	59.716	20	TACAGCAGGATTGGAAACCC	59.933	20	184	1272	1455	TTGTTGGCTCTCAGCTTGAA	59.716	20	GGAAACCCCAATCGCTTTAT	60.15	20	172	1272	1443	TTGTTGGCTCTCAGCTTGAA	59.716	20	TCCCAACCACAAATCCTTTC	59.767	20	245	1272	1516
F01_transcript_17974	1	p2	(GA)6	12	28	39	--
F01_transcript_17974	2	p1	(T)10	10	1323	1332	CCTCGTACATCCTCCCAAAA	59.926	20	TACATGTTCAAACCGAGGCA	60.111	20	154	1293	1446	AATCCCTCGTACATCCTCCC	60.154	20	TACATGTTCAAACCGAGGCA	60.111	20	158	1289	1446	CCTCGTACATCCTCCCAAAA	59.926	20	CAAACCGAGGCACACTCTTT	60.291	20	146	1293	1438
F01_transcript_17991	1	p1	(A)14	14	1403	1416	GCGATTTGCAGTTGAGTGAA	59.995	20	GCAATTTCTCAGTTCCAATCC	58.636	21	175	1285	1459	GCTATGCGATTTGCAGTTGA	59.983	20	GCAATTTCTCAGTTCCAATCC	58.636	21	180	1280	1459	GCGATTTGCAGTTGAGTGAA	59.995	20	GCAATTTCTCAGTTCCAATCCT	59.598	22	175	1285	1459
F01_transcript_17995	1	p2	(GA)6	12	1417	1428	GAACTTCTACGGCGACCAAG	59.875	20	TGACACACACCCAACCTAGC	59.597	20	269	1282	1550	GAACTTCTACGGCGACCAAG	59.875	20	GACACACACCCAACCTAGCC	60.431	20	268	1282	1549	GAACTTCTACGGCGACCAAG	59.875	20	ACACACACCCAACCTAGCCT	59.499	20	267	1282	1548
F01_transcript_18002	1	p2	(CT)7	14	84	97	TCCCTTTCTCTCTCCCTTCC	59.749	20	ACAACAAGATGGGCGTTTTC	59.978	20	167	53	219	TCCCTTCCCTTTCTCTCTCC	59.749	20	ACAACAAGATGGGCGTTTTC	59.978	20	172	48	219	TCCCTTTCTCTCTCCCTTCC	59.749	20	GACAACAAGATGGGCGTTTT	59.978	20	168	53	220
F01_transcript_18006	1	p3	(TGG)6	18	965	982	TTTTCCATTTCTTTCACGCC	60.053	20	ATTCCCAGTCGAAGGGTTCT	59.935	20	265	856	1120	ATTTCTTTCACGCCCAGATG	60.074	20	ATTCCCAGTCGAAGGGTTCT	59.935	20	259	862	1120	CATTTCTTTCACGCCCAGAT	60.074	20	ATTCCCAGTCGAAGGGTTCT	59.935	20	260	861	1120
F01_transcript_18006	2	p1	(T)10	10	1391	1400	TGAGAAACGGCAACACAGAG	60.025	20	GGATGGACGGTCAAAGATGT	59.786	20	245	1240	1484	TTTGAGAAACGGCAACACAG	59.881	20	GGATGGACGGTCAAAGATGT	59.786	20	247	1238	1484	CTTTGAGAAACGGCAACACA	59.881	20	GGATGGACGGTCAAAGATGT	59.786	20	248	1237	1484
F01_transcript_18007	1	p3	(ATG)5	15	1453	1467	TATGATGGAAGGGTTCTGCC	59.894	20	TCATGCAATTCAAGTCCATCTT	59.574	22	261	1273	1533	GGTTCTGCCTGCAGTTGAAT	60.263	20	TCATGCAATTCAAGTCCATCTT	59.574	22	250	1284	1533	TGGTTTTTCATTTGTGCCCT	60.344	20	TCATGCAATTCAAGTCCATCTT	59.574	22	177	1357	1533
F01_transcript_18026	1	p2	(CT)8	16	49	64	GCCCAAGCGAAGTCTCTTCT	61.038	20	TTTCAATGGCTTGGGATTTC	59.878	20	121	1	121	GCCCAAGCGAAGTCTCTTCT	61.038	20	TTGAAGGGATTTTCAATGGC	59.878	20	131	1	131	GCCCAAGCGAAGTCTCTTCT	61.038	20	GTTGGGGATGGATTGAGATG	60.135	20	246	1	246
F01_transcript_18029	1	c*	(A)12gaagaagagagaaataatatttggaaaattaattctgtgctctctcttctcgcatcatcgtcatcc(T)10(TC)7*	101	5	105	--
F01_transcript_18029	2	p3	(GTA)7	21	1435	1455	TGGGCCGTTTTGTATTGTTT	60.223	20	CCTACGTACAATGAATCAACCG	59.402	22	194	1320	1513	TTGGGCCGTTTTGTATTGTT	60.223	20	CCTACGTACAATGAATCAACCG	59.402	22	195	1319	1513	ATTTGGGCCGTTTTGTATTG	59.699	20	CCTACGTACAATGAATCAACCG	59.402	22	197	1317	1513
F01_transcript_18046	1	p2	(AT)12	24	47	70	--
F01_transcript_18046	2	p2	(AG)6	12	1316	1327	TGGTGTTGCATAGTTTCCCA	59.964	20	AACAACACCACCACATTTCG	59.314	20	130	1248	1377	TGACGGTAGAGACGTTGGTG	59.745	20	ACCACCACATTTCGAAACAA	58.874	20	139	1233	1371	GAGGAAGGAAAGGCAACCAC	60.999	20	AACAACACCACCACATTTCG	59.314	20	212	1166	1377
F01_transcript_18050	1	p3	(AAG)6	18	56	73	TGTAAAATCAAGAGCGAGCG	59.206	20	TTGCATAGAAACGTTGACGC	59.879	20	252	32	283	TGTAAAATCAAGAGCGAGCG	59.206	20	CGCTGATGACAGCTCTATGG	59.572	20	148	32	179	TGTAAAATCAAGAGCGAGCG	59.206	20	CTGATGACAGCTCTATGGCG	59.572	20	146	32	177
F01_transcript_18066	1	p2	(AG)9	18	36	53	ATTACAGCCTAAGATTTATACCCCT	57.137	25	GAAAACAACGAAGCCAAAGC	59.867	20	246	0	245	ATTACAGCCTAAGATTTATACCCCT	57.137	25	GGTGACTTTGTCGAGCATGA	59.837	20	213	0	212	ATTACAGCCTAAGATTTATACCCCT	57.137	25	TCCCCTCATCTGAATCCATC	59.821	20	103	0	102
F01_transcript_18066	2	p3	(GTG)5	15	662	676	TGTTGAGGTAAAACGGGCTC	60.11	20	GCCACCACCTGAAGATTGTT	59.973	20	193	617	809	TGTTGAGGTAAAACGGGCTC	60.11	20	GGATAGCCACCACCTGAAGA	60.073	20	198	617	814	CGCGGTTTTGGTTTCATATC	60.323	20	GCCACCACCTGAAGATTGTT	59.973	20	279	531	809
F01_transcript_18074	1	p3	(TGA)5	15	1247	1261	AAGCTAGCCCTTCTCCCAAG	59.976	20	TAAGGTGACTCGCTGCCTCT	60.156	20	262	1038	1299	AAGCTAGCCCTTCTCCCAAG	59.976	20	CTAAGGTGACTCGCTGCCTC	60.156	20	263	1038	1300	AAGCTAGCCCTTCTCCCAAG	59.976	20	GAGCCTAAGGTGACTCGCTG	60.156	20	267	1038	1304
F01_transcript_18094	1	p2	(AT)19	38	46	83	TTGTACAGTTTAACGTCAACACGA	59.656	24	AAGTTGCCCGAGAGAGTGAG	59.598	20	186	14	199	TTGTACAGTTTAACGTCAACACGA	59.656	24	TGAGCTCCAGTTTCTCACCA	59.545	20	128	14	141	TTGTACAGTTTAACGTCAACACGA	59.656	24	TGAGCTCCAGTTTCTCACCA	59.545	20	170	14	183
F01_transcript_18094	2	c	(TG)13tttcttttttttccttcctggacttg(TA)21	94	1308	1401	GTCCTTCCATGCCTGAAAAA	60.051	20	TTCTAACAATAATCACAGCATACCAA	59.08	26	245	1196	1440	ATGCCTGAAAAATGGAGCTG	60.214	20	TTCTAACAATAATCACAGCATACCAA	59.08	26	237	1204	1440	GCTGCGATTTCAAATGGTCT	60.221	20	TTCTAACAATAATCACAGCATACCAA	59.08	26	221	1220	1440
F01_transcript_18100	1	p1	(A)10	10	35	44	GAGCGTACCCAATTATCAGCTT	59.656	22	ATTCCGAGTACCAGCACCAG	60.134	20	257	0	256	GAGCGTACCCAATTATCAGCTT	59.656	22	AGCACCAGATAAACAACCGC	60.14	20	245	0	244	GAGCGTACCCAATTATCAGCTT	59.656	22	GCTCTGAAATCTCCCATTGC	59.78	20	198	0	197
F01_transcript_18105	1	p2	(GA)6	12	1201	1212	AAAGGAACAGGTTGGTGTGC	60.012	20	CGAAAGCAATGCAATGAAAA	59.819	20	245	1012	1256	CAATGCAATCATCCCTTCCT	59.894	20	CCTCCCTCCTCCATACATGA	59.879	20	182	1171	1352	CTCCAATGCAATCATCCCTT	59.894	20	CCTCCCTCCTCCATACATGA	59.879	20	185	1168	1352
F01_transcript_18118	1	p2	(AT)21	42	154	195	CTGCAAAATTTTCTCTCCCC	58.762	20	TTTCATGGCTGCTTCTGACA	60.539	20	265	67	331	TGCAAAATTTTCTCTCCCCT	58.762	20	TTTCATGGCTGCTTCTGACA	60.539	20	264	68	331	CTGCAAAATTTTCTCTCCCCT	59.712	21	TTTCATGGCTGCTTCTGACA	60.539	20	265	67	331
F01_transcript_18128	1	p2	(AT)9	18	48	65	GTACCCTTCATCTAGTCAAGTCG	57.076	23	TTGGAACCTCATTCTCCCAG	60.042	20	242	18	259	GTACCCTTCATCTAGTCAAGTCG	57.076	23	CTTGGAACCTCATTCTCCCA	60.042	20	243	18	260	AGTACCCTTCATCTAGTCAAGTCG	58.067	24	TTGGAACCTCATTCTCCCAG	60.042	20	243	17	259
F01_transcript_18130	1	p1	(C)22	22	47	68	CCCACTCCAAGCTCTGCTAT	59.454	20	GGAAGTTGGATCTGCTCGTC	59.81	20	127	4	130	CCCACTCCAAGCTCTGCTAT	59.454	20	AGGGTTAGGGGTTTGGAAGA	59.799	20	255	4	258	CCCACTCCAAGCTCTGCTAT	59.454	20	GAGGGTTAGGGGTTTGGAAG	59.799	20	256	4	259
F01_transcript_18134	1	p3	(GCA)6	18	1264	1281	TCAGGAAAAACGATCAAGGG	60.044	20	AATGCTGCCGATAATGCTCT	59.835	20	211	1098	1308	TCAGGAAAAACGATCAAGGG	60.044	20	ATGCTGCCGATAATGCTCTT	59.835	20	210	1098	1307	ACGATCAAGGGTCGAATGTC	59.934	20	AATGCTGCCGATAATGCTCT	59.835	20	202	1107	1308
F01_transcript_18139	1	p2	(AC)7	14	601	614	GAAGCAACCATTGAGCATGA	59.805	20	CGAATTAATGCCCTGCAAAT	59.928	20	115	553	667	GAAGCAACCATTGAGCATGA	59.805	20	AATGCCCTGCAAATGAGAAC	60.081	20	109	553	661	AGCAACCATTGAGCATGACA	60.272	20	ACACTGGAATTGTTGGCCTC	59.973	20	194	555	748
F01_transcript_18163	1	p4	(TGTT)5	20	1258	1277	CATGACATCAGTGACGAGCC	60.279	20	TTTCAATTTTCGGAGCCATC	60.016	20	265	1107	1371	AGGCTCTCGCATTTAATCCC	60.551	20	TTTCAATTTTCGGAGCCATC	60.016	20	165	1207	1371	CATGACATCAGTGACGAGCC	60.279	20	TTCAATTTTCGGAGCCATCT	59.645	20	264	1107	1370
F01_transcript_18166	1	p3	(AGA)5	15	116	130	TTGAGCAAGTATCAATGGCG	59.833	20	TTCTCCTCCTTGTGATTCCG	60.187	20	149	12	160	TTGAGCAAGTATCAATGGCG	59.833	20	CTCCTCCTTGTGATTCCGAG	59.797	20	147	12	158	ATCAATGGCGAAGAAGAGGA	59.773	20	TTCTCCTCCTTGTGATTCCG	60.187	20	139	22	160
F01_transcript_18167	1	p3	(AAG)9	27	18	44	--
F01_transcript_18167	2	p1	(T)10	10	1416	1425	TTGGTTTTTCCCTGAGCTTG	60.22	20	CAGTCACAAGCAGGCACACT	60.096	20	215	1287	1501	ACACGAGACGCTTGGTTTTT	59.78	20	CAGTCACAAGCAGGCACACT	60.096	20	226	1276	1501	GTATGCACACGAGACGCTTG	60.481	20	CAGTCACAAGCAGGCACACT	60.096	20	232	1270	1501
F01_transcript_18191	1	p1	(A)10	10	4	13	--
F01_transcript_18191	2	p1	(T)10	10	1350	1359	GCAGTGAAGAAATTGGGGAA	60.051	20	GCCAATGCCAATCACTACAA	59.548	20	192	1253	1444	GCAGTGAAGAAATTGGGGAA	60.051	20	AGCCAATGCCAATCACTACA	59.152	20	193	1253	1445	ACGTGCCTAAGGTTGGGTAA	59.494	20	GCCAATGCCAATCACTACAA	59.548	20	135	1310	1444
F01_transcript_18193	1	p2	(CT)11	22	109	130	GCTAACTGCCATCTTCCCAA	60.214	20	ACATAGGTGGTGGTGGTGGT	60.009	20	227	49	275	AGCCCGTGTCCTTTTCTCTT	60.247	20	ACATAGGTGGTGGTGGTGGT	60.009	20	267	9	275	AAGCCCGTGTCCTTTTCTCT	60.247	20	ACATAGGTGGTGGTGGTGGT	60.009	20	268	8	275
F01_transcript_18193	2	p3	(CAC)8	24	247	270	GCTAACTGCCATCTTCCCAA	60.214	20	ACATAGGTGGTGGTGGTGGT	60.009	20	227	49	275	AGCCCGTGTCCTTTTCTCTT	60.247	20	ACATAGGTGGTGGTGGTGGT	60.009	20	267	9	275	AAGCCCGTGTCCTTTTCTCT	60.247	20	ACATAGGTGGTGGTGGTGGT	60.009	20	268	8	275
F01_transcript_18193	3	p2	(TA)27	54	1288	1341	ATTACAATTGGGGGCACAAA	60.053	20	GAGCTAGGCCTGGTTCATTG	59.836	20	242	1243	1484	AGCCGTCCCAAACTTGATTA	59.569	20	GAGCTAGGCCTGGTTCATTG	59.836	20	258	1227	1484	GTCTATTCATCAGCCGTCCC	59.513	20	GAGCTAGGCCTGGTTCATTG	59.836	20	269	1216	1484
F01_transcript_18200	1	p3	(GAA)16	48	196	243	AATGCCTCCACTCCATCAAT	59.366	20	GGTGGGCTTGATTAGTTTGG	59.429	20	274	41	314	AATGCCTCCACTCCATCAAT	59.366	20	TGGTTTTGTTTTTGGTGGAAA	60.222	21	257	41	297	AATGCCTCCACTCCATCAAT	59.366	20	GGTGGGCTTGATTAGTTTGGT	60.235	21	274	41	314
F01_transcript_18206	1	p6	(CACCTC)6	36	318	353	AAGTCCCCCTCCTCAAAGAA	60.045	20	TTCACATTCCTGGTGAGCTG	59.831	20	186	258	443	CGCTCCAAATCCTTCACTTC	59.813	20	TTTCCTTGGAGGTGGAGTTG	60.081	20	186	199	384	AAGTCCCCCTCCTCAAAGAA	60.045	20	TTGGAGGTGGAGTTGCTTTC	60.232	20	122	258	379
F01_transcript_18206	2	p5	(ATAGC)5	25	1403	1427	AGACGTGGGAGGTCATCATC	59.928	20	CAAGCATTCTCCAACACAACA	59.749	21	278	1183	1460	AAGGCGGGGGAGAAGTAGTA	60.089	20	CAAGCATTCTCCAACACAACA	59.749	21	195	1266	1460	GCTTTGCAGCTAGGATTTGC	60.124	20	CAAGCATTCTCCAACACAACA	59.749	21	114	1347	1460
F01_transcript_18217	1	p2	(AG)8	16	54	69	TTTTCAGTTTTCATATCCAGTCCA	59.878	24	GTGGGTCCAAAACTACACCG	60.269	20	148	24	171	TTTTCAGTTTTCATATCCAGTCCA	59.878	24	TGGGTCCAAAACTACACCGT	60.269	20	147	24	170	TTTCAGTTTTCATATCCAGTCCA	58.616	23	GTGGGTCCAAAACTACACCG	60.269	20	147	25	171
F01_transcript_18221	1	p2	(AT)10	20	1418	1437	CACAAGTGAGAGAGGCCCAT	60.261	20	TTGCAGAGGACCAACACACT	59.31	20	198	1303	1500	CACAAGTGAGAGAGGCCCAT	60.261	20	TGCAGAGGACCAACACACTT	59.31	20	197	1303	1499	CCCATGAGGCCAAAGATAAG	59.523	20	TGCAGAGGACCAACACACTT	59.31	20	182	1318	1499
F01_transcript_18225	1	p2	(AC)7	14	127	140	ACCTCAACTCATCGCTCGTT	59.874	20	GGCTGTTCCCTGACGATAAA	60.074	20	280	53	332	ACTCATCGCTCGTTCCTGAT	59.834	20	GGCTGTTCCCTGACGATAAA	60.074	20	274	59	332	ACTCATCGCTCGTTCCTGAT	59.834	20	CTGAAAGGCTGTTCCCTGAC	59.844	20	280	59	338
F01_transcript_18237	1	p3	(GGA)10	30	50	79	AGACACAGACGTCTCCCACA	59.278	20	TTTCGTCGATCCTGCTCTTT	59.955	20	116	25	140	AGACACAGACGTCTCCCACA	59.278	20	TTTTCGTCGATCCTGCTCTT	59.955	20	117	25	141	CAGACACAGACGTCTCCCAC	59.278	20	TTTCGTCGATCCTGCTCTTT	59.955	20	117	24	140
F01_transcript_18242	1	p2	(TC)7	14	76	89	GCCTCTTTTCCTTTCTTTCCTT	59.403	22	AACAGATGAGGAGAAGGCCA	59.803	20	207	38	244	CCTTTCTTTCCTTCACATCTCC	59.213	22	TGATGGTTAGGTTGCTGCTG	59.864	20	275	47	321	GCCTCTTTTCCTTTCTTTCCTT	59.403	22	CCAATTGGGATGAGGATGAT	59.563	20	255	38	292
F01_transcript_18242	2	p1	(T)19	19	1438	1456	TGCGTGCTTCAGTTGAAAGT	59.64	20	AGCAAACTTCACACATCATCG	58.79	21	260	1275	1534	CCGAAGCTCATTCTTTCTGG	59.948	20	CACACCAAGTAAACAAACCCA	58.444	21	255	1245	1499	GCCGAAGCTCATTCTTTCTG	60.096	20	CACACCAAGTAAACAAACCCA	58.444	21	256	1244	1499
F01_transcript_18246	1	p1	(T)11	11	378	388	AAAGGGGCGATTCTCTCAAT	60.039	20	TGCAAATGACTTCCTCCAGA	59.369	20	197	279	475	AAAGGGGCGATTCTCTCAAT	60.039	20	TGCAAATGACTTCCTCCAGA	59.369	20	257	219	475	ACATCCATAGGAAACGCTCG	60.096	20	TGCAAATGACTTCCTCCAGA	59.369	20	176	300	475
F01_transcript_18247	1	p3	(GAA)6	18	1138	1155	TTTCAGACTCCAGGGCTTGT	59.844	20	TCGGTGTGTTGAAACTGAGC	59.88	20	259	1111	1369	TGTTTCAGACTCCAGGGCTT	59.844	20	TCGGTGTGTTGAAACTGAGC	59.88	20	261	1109	1369	GTTTCAGACTCCAGGGCTTG	59.844	20	TCGGTGTGTTGAAACTGAGC	59.88	20	260	1110	1369
F01_transcript_18256	1	p6	(ATCCTG)6	36	306	341	TCTCCATCTCAATCCATCCC	59.821	20	TCACACTTTTCGTGCTCGTC	60.032	20	167	223	389	TCTCCATCTCAATCCATCCC	59.821	20	GGCCGTATTTCATGCAGTTT	59.967	20	268	223	490	TCTCCATCTCAATCCATCCC	59.821	20	CCCCGGTAAAAATGTCACAC	60.088	20	181	223	403
F01_transcript_18257	1	p2	(AG)8	16	90	105	GAAACCCAAACCCTAGACCC	59.668	20	GAAAACAACGAAGCCAAAGC	59.867	20	276	22	297	GAAACCCAAACCCTAGACCC	59.668	20	GGTGACTTTGTCGAGCATGA	59.837	20	243	22	264	GAAACCCAAACCCTAGACCC	59.668	20	TCCCCTCATCTGAATCCATC	59.821	20	133	22	154
F01_transcript_18257	2	p3	(GTG)5	15	714	728	TGTTGAGGTAAAACGGGCTC	60.11	20	GCCACCACCTGAAGATTGTT	59.973	20	193	669	861	TGTTGAGGTAAAACGGGCTC	60.11	20	GGATAGCCACCACCTGAAGA	60.073	20	198	669	866	CGCGGTTTTGGTTTCATATC	60.323	20	GCCACCACCTGAAGATTGTT	59.973	20	279	583	861
F01_transcript_18263	1	p1	(A)10	10	1415	1424	TGGTCTCGCTATGTTTCGTG	59.864	20	GCTTGCAAAGCTTGCTCATA	59.353	20	218	1305	1522	TTAAGGCTCCTTTTTGCGAG	59.603	20	GCTTGCAAAGCTTGCTCATA	59.353	20	133	1390	1522	TGGTCTCGCTATGTTTCGTG	59.864	20	GCTTGCAAAGCTTGCTCATAC	60.173	21	218	1305	1522
F01_transcript_18268	1	p3	(ATG)7	21	1115	1135	CCAGAGGTGACAGTGAGCAA	60.022	20	CATTGCTAATTCAGCCAGCA	59.976	20	267	936	1202	AGGAGATTTTCGCAGGGAAT	60.039	20	CATTGCTAATTCAGCCAGCA	59.976	20	135	1068	1202	AGCGAGTGATGGATTATGGG	59.917	20	CATTGCTAATTCAGCCAGCA	59.976	20	217	986	1202
F01_transcript_18275	1	p2	(AT)10	20	14	33	--
F01_transcript_18280	1	p3	(GAA)5	15	427	441	ATTCCAGGCAAATTGGAAAA	59.388	20	ATCGAAGAGGCCCGAACTAT	60.06	20	146	384	529	ATTCCAGGCAAATTGGAAAA	59.388	20	ATATCGAAGAGGCCCGAACT	60.06	20	148	384	531	TTCCAGGCAAATTGGAAAAT	59.388	20	ATATCGAAGAGGCCCGAACT	60.06	20	147	385	531
F01_transcript_18284	1	p1	(T)11	11	1361	1371	TGAAGCTGCTGCAATGAACT	59.746	20	TTGCATATGGTTGCACTTGA	58.703	20	195	1318	1512	CTGAAGCTGCTGCAATGAAC	59.746	20	TTGCATATGGTTGCACTTGA	58.703	20	196	1317	1512	ACTGAAGCTGCTGCAATGAA	59.746	20	TTGCATATGGTTGCACTTGA	58.703	20	197	1316	1512
F01_transcript_18291	1	p3	(CAG)6	18	922	939	GTCGTCTTCAGAGACTGGGG	59.835	20	TGCAAAAAGTTATCGGCCTC	60.209	20	204	844	1047	CTTCAGAGACTGGGGATGGA	60.191	20	TGCAAAAAGTTATCGGCCTC	60.209	20	199	849	1047	TCTTCAGAGACTGGGGATGG	60.191	20	TGCAAAAAGTTATCGGCCTC	60.209	20	200	848	1047
F01_transcript_18304	1	p1	(G)23	23	1441	1463	GGGGCATCACTGTGAAACTT	59.973	20	CAGAATTTTCTTGGCACTGTTG	59.785	22	219	1293	1511	GGGGCATCACTGTGAAACTT	59.973	20	GAATTTTCTTGGCACTGTTGTG	59.654	22	217	1293	1509	TCCTGGGGAACTTGGATATG	59.744	20	CAGAATTTTCTTGGCACTGTTG	59.785	22	161	1351	1511
F01_transcript_18324	1	p3	(AAG)6	18	120	137	CCTTCCTTCCGTGTACTCCA	60.103	20	TTACAAGCTTGGCAACACCA	60.293	20	203	65	267	CCTTCCTTCCGTGTACTCCA	60.103	20	TACAAGCTTGGCAACACCAA	60.293	20	202	65	266	CCTTCCTTCCGTGTACTCCA	60.103	20	GGCAGAAAGTTCACCAGACC	59.703	20	232	65	296
F01_transcript_18327	1	p2	(AT)21	42	1403	1444	TGCCTTGATTGCACTGAAAC	59.847	20	TGAATAAATGACGACATGGACC	59.691	22	137	1333	1469	ATGCCTTGATTGCACTGAAAC	60.133	21	TGAATAAATGACGACATGGACC	59.691	22	138	1332	1469	TGCCTTGATTGCACTGAAAC	59.847	20	TTGAATAAATGACGACATGGACC	60.953	23	138	1333	1470
F01_transcript_18328	1	p1	(C)13	13	1294	1306	GGCATTTGAAAGGATGGAAA	59.878	20	AAGAAGTCCAATTGGGGGTG	61.103	20	247	1091	1337	TGACAATCCCCGGAAATAAA	60.124	20	AAGAAGTCCAATTGGGGGTG	61.103	20	174	1164	1337	CCAGCAACCTTGAGTGACAA	59.873	20	AAGAAGTCCAATTGGGGGTG	61.103	20	188	1150	1337
F01_transcript_18331	1	p2	(TC)6	12	89	100	GGCTGACCAAAGACAAGTCC	59.703	20	AACTTCGTCTTCTTCGGCAA	59.993	20	268	1	268	GGCTGACCAAAGACAAGTCC	59.703	20	ACTTCGTCTTCTTCGGCAAA	59.993	20	267	1	267	ACCCTCAATTCTTTCTCCCC	59.373	20	AACTTCGTCTTCTTCGGCAA	59.993	20	207	62	268
F01_transcript_18331	2	p1	(C)26	26	1194	1219	CCTTGAGAGGGGCAATATGA	60.029	20	CCCAGATGAAACACCCAACT	59.82	20	139	1128	1266	CCTTGAGAGGGGCAATATGA	60.029	20	CGGATTAAACAGAAACCCCA	59.795	20	155	1128	1282	TAGTGGCAAAGCAGCAGAGA	59.888	20	CCCAGATGAAACACCCAACT	59.82	20	183	1084	1266
F01_transcript_18335	1	p3	(TGC)6	18	1235	1252	TGACAAGGTGCTCTGATTGC	59.992	20	TCCAACAGAAACAAGCCTCC	60.232	20	199	1171	1369	TTGCAATGAGAATGGGTTGA	60.049	20	TCCAACAGAAACAAGCCTCC	60.232	20	183	1187	1369	GTCCCAATTGTAATGGCAGC	60.339	20	TCCAACAGAAACAAGCCTCC	60.232	20	250	1120	1369
F01_transcript_18338	1	p2	(TA)7	14	122	135	TTCGTTTCAAAAATCTCGTTGTT	60.03	23	AAGGAATCTGTTTTTCCGCA	59.685	20	223	32	254	TTCGTTTCAAAAATCTCGTTGTT	60.03	23	CGAAGGAATCTGTTTTTCCG	59.679	20	225	32	256	TTCGTTTCAAAAATCTCGTTG	57.941	21	AAGGAATCTGTTTTTCCGCA	59.685	20	223	32	254
F01_transcript_18343	1	p4	(TCTT)5	20	78	97	GATCCCAGACAAAACTACCGTT	59.393	22	TCTTGGTGCTGTCTCTGTGG	60.022	20	280	39	318	TGAAGTCAAAAGATCCCAGACA	59.711	22	TGTGGCATGATAACCACCAT	59.654	20	276	28	303	TGAAGTCAAAAGATCCCAGACA	59.711	22	CTGTGGCATGATAACCACCA	60.39	20	277	28	304
F01_transcript_18351	1	p3	(GTA)5	15	372	386	TTCCAGTCCTTCTTTGGTGG	60.081	20	ACCAGACCCTTGACAACCAG	60.002	20	240	328	567	GTGGTGGGGGTATGAATGAC	59.91	20	ACCAGACCCTTGACAACCAG	60.002	20	272	296	567	CACTCAAGGAAGGAATGGGA	60.042	20	TTGATCCCTTACCCTTGCAC	59.933	20	249	275	523
F01_transcript_18355	1	p1	(C)17	17	93	109	GACGACAACAGCACGAGAGA	60.187	20	TCCCAAACAATTCCAGAACC	59.767	20	240	26	265	CGACAACAGCACGAGAGAGA	60.333	20	TCCCAAACAATTCCAGAACC	59.767	20	238	28	265	AAGACGACAACAGCACGAGA	59.622	20	TCCCAAACAATTCCAGAACC	59.767	20	242	24	265
F01_transcript_18355	2	p1	(T)15	15	1283	1297	TCTGACATTGCACCTCAAGC	59.992	20	CGCACACCATACTCCACATC	59.992	20	127	1200	1326	GCTCTGACATTGCACCTCAA	59.992	20	CGCACACCATACTCCACATC	59.992	20	129	1198	1326	GCTCTGACATTGCACCTCAA	59.992	20	CTTGCGACATTGATCGCTTA	59.976	20	247	1198	1444
F01_transcript_18356	1	p3	(CTC)5	15	625	639	CTCCTCGATTTGTCCCGTAA	60.066	20	GGATAAGTCCTGGGTGGGAT	60.015	20	173	536	708	GCGATCCCCCTCTATACTCC	59.888	20	GGATAAGTCCTGGGTGGGAT	60.015	20	133	576	708	AACCCTTCCGGTATGGTCTC	60.19	20	GGATAAGTCCTGGGTGGGAT	60.015	20	233	476	708
F01_transcript_18366	1	p3	(TCC)5	15	190	204	GGCATCGACTTCATCAACCT	60.081	20	GCAATCCATCTCTTCTTCCG	59.773	20	277	165	441	GGCATCGACTTCATCAACCT	60.081	20	AGATTCAGTGCAACGAAGGC	60.406	20	163	165	327	GGCATCGACTTCATCAACCT	60.081	20	GATTCAGTGCAACGAAGGCT	60.406	20	162	165	326
F01_transcript_18373	1	p2	(TC)7	14	89	102	CCTTCTCTCCTCCCTCGTCT	59.945	20	ACGTGCAGCACCAACAATAC	59.646	20	227	13	239	CCTTCTCTCCTCCCTCGTCT	59.945	20	GTACGTGCAGCACCAACAAT	59.646	20	229	13	241	CCTTCTCTCCTCCCTCGTCT	59.945	20	AGTGTTCCAAGAAAGCCACC	59.187	20	256	13	268
F01_transcript_18373	2	p2	(TC)8	16	1556	1571	--
F01_transcript_18374	1	p3	(AGA)5	15	150	164	TTGAGCAAGTATCAATGGCG	59.833	20	TTCTCCTCCTTGTGATTCCG	60.187	20	149	46	194	TTGAGCAAGTATCAATGGCG	59.833	20	CTCCTCCTTGTGATTCCGAG	59.797	20	147	46	192	ATCAATGGCGAAGAAGAGGA	59.773	20	TTCTCCTCCTTGTGATTCCG	60.187	20	139	56	194
F01_transcript_18381	1	p3	(GAA)9	27	38	64	TAACGGAGGATCAAAATGCC	59.901	20	CAAACAGACCTGAATCGCAA	59.84	20	158	13	170	TAACGGAGGATCAAAATGCC	59.901	20	CAGGAAGGCGTTCCAGTATC	59.694	20	127	13	139	TAACGGAGGATCAAAATGCC	59.901	20	TGGAAATTAGAAAGCGCCAT	59.682	20	184	13	196
F01_transcript_18387	1	p3	(GAG)7	21	273	293	ACCCACCTCAAGAACGTTTG	60.005	20	CCAAAAAGCCTAACCATCCA	59.931	20	208	179	386	GCAATTGGTGTTGTTTCGTG	60.011	20	CCAAAAAGCCTAACCATCCA	59.931	20	182	205	386	ACCCACCTCAAGAACGTTTG	60.005	20	ACTGCCACCACCAATAGGAC	59.851	20	276	179	454
F01_transcript_18396	1	p2	(TA)6	12	107	118	AATCCATGAGCTTCACTCCG	60.218	20	TTCACGCCACAATCAACTCT	59.293	20	132	54	185	AATCCATGAGCTTCACTCCG	60.218	20	GTTCACGCCACAATCAACTC	59.143	20	133	54	186	AATCCATGAGCTTCACTCCG	60.218	20	TAATTAAGTGCGCGAGATGC	59.08	20	154	54	207
F01_transcript_18406	1	p3	(TCC)7	21	99	119	CATATTGCCATGGTTCCTCC	60.155	20	GAAACCAGGTGTTGACGGAT	59.827	20	173	59	231	GCAAATACATACGCGCAAAA	59.743	20	CTGCTGAGGAATTGTTGGGT	60.111	20	141	13	153	TACGCGCAAAATCAATCTCA	60.356	20	GCTGAGGAATTGTTGGGTGT	59.973	20	130	22	151
F01_transcript_18407	1	c	(TC)13tatctctctcta(TC)6	50	1073	1122	GTTAGGGGGATGTCATGTGG	60.05	20	ATCCGTCATAAATGTGCGCT	60.499	20	261	981	1241	GGGGATTCCATTCTGGAGTT	60.133	20	TATGCTTGGGTCATGAGGTG	59.522	20	277	1000	1276	GGGGATTCCATTCTGGAGTT	60.133	20	ATCCGTCATAAATGTGCGCT	60.499	20	242	1000	1241
F01_transcript_18413	1	p1	(T)10	10	84	93	TTCAGTTTTTGGGTTTAGCAA	57.503	21	CAGTCCTTCAATGCTGTCCC	60.656	20	196	27	222	CTTCAGTTTTTGGGTTTAGCAA	58.479	22	CAGTCCTTCAATGCTGTCCC	60.656	20	197	26	222	TTCAGTTTTTGGGTTTAGCAA	57.503	21	GTCCCCTTCGAAAACCACTC	60.862	20	181	27	207
F01_transcript_18428	1	p2	(AT)9	18	13	30	--
F01_transcript_18430	1	p1	(C)17	17	27	43	ACTGCCCTCAAGCACAGATT	59.874	20	CATGAGCGCAGAGAATCAAA	60.096	20	147	1	147	ACTGCCCTCAAGCACAGATT	59.874	20	CAGCCATTCCTAAGAGCCAC	59.836	20	103	1	103	ACTGCCCTCAAGCACAGATT	59.874	20	CAAAAAGGGAGCAAAGCATC	59.823	20	218	1	218
F01_transcript_18431	1	p1	(A)11	11	5	15	--
F01_transcript_18431	2	p3	(CCA)5	15	675	689	TCTCACTCATGGCTCATTGC	59.95	20	ACTGCACCCTGCAGAGAACT	60.057	20	261	599	859	TCTCACTCATGGCTCATTGC	59.95	20	TGTAGGGGAAGTTGGAGCAC	60.111	20	211	599	809	CCCACCACTTTCTTCCTCAA	60.081	20	TGTAGGGGAAGTTGGAGCAC	60.111	20	268	542	809
F01_transcript_18445	1	p3	(TTC)5	15	79	93	GCGTCAAGCATCATTCTCCT	60.37	20	GACGCCATTGAATTGGAACT	59.939	20	142	30	171	AGCGTCAAGCATCATTCTCC	60.37	20	GACGCCATTGAATTGGAACT	59.939	20	143	29	171	GCGTCAAGCATCATTCTCCT	60.37	20	ATTGGGTGGTGGATTGTGAT	59.91	20	101	30	130
F01_transcript_18445	2	p1	(A)10	10	1493	1502	--
F01_transcript_18459	1	c	(TG)20tc(TA)25	92	1282	1373	TACACCGGAACAAACTGCAA	60.149	20	CCCACGAACAAATCATTTCA	59.371	20	273	1154	1426	GGCTTTGAAGGTTTGCTTGA	60.365	20	CCCACGAACAAATCATTTCA	59.371	20	176	1251	1426	GGTACACCGGAACAAACTGC	60.419	20	CCCACGAACAAATCATTTCA	59.371	20	275	1152	1426
F01_transcript_18461	1	p2	(AG)8	16	60	75	TCTGCATCGGAAGGTTTCTC	60.34	20	GCGCAAAGAATTCAACCAAT	60.081	20	250	4	253	TCTCTGCATCGGAAGGTTTC	60.34	20	GCGCAAAGAATTCAACCAAT	60.081	20	252	2	253	TGCATCGGAAGGTTTCTCTT	59.813	20	TACAATGACCACACCAAGGC	59.42	20	266	6	271
F01_transcript_18461	2	p1	(T)10	10	1424	1433	TGGACAAATCCTGGAGGAAG	60.042	20	CATTGCTCCTAAAGATCAAAATCA	59.644	24	156	1308	1463	GGGAAAGGGTAATCTGCCTC	59.903	20	CATTGCTCCTAAAGATCAAAATCA	59.644	24	225	1239	1463	CTCTTCAGAGCACCCCTGAG	60.127	20	CATTGCTCCTAAAGATCAAAATCA	59.644	24	208	1256	1463
F01_transcript_18473	1	p2	(AG)8	16	162	177	TGACCCAACCATCTGCTTTT	60.495	20	GAGTTTTGGGCTTCGACTTG	59.853	20	257	47	303	TTGACCCAACCATCTGCTTT	60.495	20	GAGTTTTGGGCTTCGACTTG	59.853	20	258	46	303	TGACCCAACCATCTGCTTTT	60.495	20	AGTTTTGGGCTTCGACTTGA	59.853	20	256	47	302
F01_transcript_18485	1	p3	(TAT)5	15	1313	1327	TTCCCACAAGACATTGCGTA	60.111	20	TTTTCTCCAATTTTTGGGCT	58.67	20	190	1184	1373	TTCCCACAAGACATTGCGTA	60.111	20	TCCAATTTTTGGGCTACTGAA	59.573	21	185	1184	1368	TTCCCACAAGACATTGCGTA	60.111	20	GTTTTCTCCAATTTTTGGGC	58.533	20	191	1184	1374
F01_transcript_18487	1	p3	(AGC)5	15	918	932	ACCCTGTCCCTGAAGTGATG	59.962	20	AATGGTAAGTCCAACAGCGG	59.993	20	149	860	1008	ACCCTGTCCCTGAAGTGATG	59.962	20	TCAGCTGGTCTCTGAACCCT	59.986	20	109	860	968	GATGGGGAAGGGATTCCTAA	60.089	20	AATGGTAAGTCCAACAGCGG	59.993	20	225	784	1008
F01_transcript_18487	2	c	(TA)11tgggattccattcacaacaaccggttgttgggagcaacctatttttggcccagccgctgtagcggcttat(A)10taaaatttgataaggaccggtacaggttgtagcggctggacaaaatgagttgctctccaataacaggttgctgtggatggaattcc(TA)20	228	1176	1403	--
F01_transcript_18488	1	p3	(AAT)9	27	7	33	--
F01_transcript_18495	1	p1	(C)17	17	94	110	GACGACAACAGCACGAGAGA	60.187	20	CCCAAACAATTCCAGAACGA	60.863	20	240	26	265	GACGACAACAGCACGAGAGA	60.187	20	TCCCAAACAATTCCAGAACG	60.863	20	241	26	266	CGACAACAGCACGAGAGAGA	60.333	20	CCCAAACAATTCCAGAACGA	60.863	20	238	28	265
F01_transcript_18514	1	p1	(A)14	14	1178	1191	GCCAGATGATGTTTGGTCTTC	59.546	21	TCCATAGCCAGACAGACCCT	59.679	20	259	1128	1386	GCCAGATGATGTTTGGTCTTC	59.546	21	GCCAGACAGACCCTTCAAGA	60.386	20	253	1128	1380	GCCAGATGATGTTTGGTCTTC	59.546	21	CCATAGCCAGACAGACCCTT	59.162	20	258	1128	1385
F01_transcript_18521	1	p3	(GAG)8	24	52	75	GAAGGTTTCTAGGCCCCAAA	60.423	20	GCTTCTGTGCTCCCTCACTC	60.143	20	100	0	99	GAAGGTTTCTAGGCCCCAAA	60.423	20	CATTGCTTCTGTGCTCCCTC	60.945	20	104	0	103	GAAGGTTTCTAGGCCCCAAA	60.423	20	ATTGCTTCTGTGCTCCCTCA	60.945	20	103	0	102
F01_transcript_18522	1	p2	(TA)6	12	310	321	TACTCCTCCTTGGATGCCAC	60.073	20	GACAATCGATGATTGCAACG	60.08	20	277	75	351	GATGCCACAGACGCTATTGA	59.83	20	GACAATCGATGATTGCAACG	60.08	20	265	87	351	TGGGAGTGGAGATGCTAAGG	60.21	20	GACAATCGATGATTGCAACG	60.08	20	143	209	351
F01_transcript_18522	2	p1	(A)15	15	474	488	AGTCTTTCTGGCACAGCCAT	59.874	20	CACGGTGGTGTTTCATTGAG	60.001	20	255	402	656	AGTCTTTCTGGCACAGCCAT	59.874	20	TGAACACGGTGGTGTTTCAT	59.855	20	259	402	660	GCACAGCCATAATTTGGTCA	59.548	20	CACGGTGGTGTTTCATTGAG	60.001	20	245	412	656
F01_transcript_18522	3	p2	(TA)13	26	978	1003	GCATTGAGGGCTTTTTGGTA	60.074	20	GGGAATATAGAGCTGCACAACTG	60.163	23	276	889	1164	GCATTGAGGGCTTTTTGGTA	60.074	20	GAGGGAATATAGAGCTGCACAA	58.493	22	278	889	1166	GCATTGAGGGCTTTTTGGTA	60.074	20	AGAGGGAATATAGAGCTGCACAA	59.428	23	279	889	1167
F01_transcript_18522	4	p2	(TA)20	40	1168	1207	CAGTTGTGCAGCTCTATATTCCC	60.163	23	TGGGCACTTGACATGCTTAG	59.864	20	192	1142	1333	CAGTTGTGCAGCTCTATATTCCC	60.163	23	ATTACCGTTGGGCACTTGAC	59.859	20	200	1142	1341	CAGTTGTGCAGCTCTATATTCCC	60.163	23	TTGGGCACTTGACATGCTTA	60.257	20	193	1142	1334
F01_transcript_18527	1	p3	(CCT)9	27	90	116	GGGCAAAATGGATGAAGAGA	60.014	20	GCGTATTTGCCCCTGTAAGA	60.096	20	264	2	265	GGGCAAAATGGATGAAGAGA	60.014	20	AGAGGTGAGCCAGGGTTTTT	60.11	20	148	2	149	GGGCAAAATGGATGAAGAGA	60.014	20	GAAATGAGAGGTGAGCCAGG	59.803	20	154	2	155
F01_transcript_18539	1	c	(AT)6act(AG)6	27	103	129	GTAAGCACCGGCCGTATAAA	59.985	20	TTGAATTCGACGCTTCCTCT	59.955	20	187	74	260	GTAAGCACCGGCCGTATAAA	59.985	20	TGAATTCGACGCTTCCTCTT	59.955	20	186	74	259	CCCCCACTCACACTTCTGAT	59.962	20	TTGAATTCGACGCTTCCTCT	59.955	20	220	41	260
F01_transcript_18544	1	p4	(TGCC)5	20	128	147	TGGAAACATTTGGTCCCATT	60.029	20	AGGAACCTCGAAAATTCCGT	59.94	20	276	86	361	TGGAAACATTTGGTCCCATT	60.029	20	TCTGAAGCAAAACCCACTGA	59.415	20	122	86	207	TGGAAACATTTGGTCCCATT	60.029	20	TGAAGCAAAACCCACTGAAA	59.293	20	120	86	205
F01_transcript_18544	2	p2	(TA)14	28	288	315	TGGAAACATTTGGTCCCATT	60.029	20	AGGAACCTCGAAAATTCCGT	59.94	20	276	86	361	TGGAAACATTTGGTCCCATT	60.029	20	TCTGAAGCAAAACCCACTGA	59.415	20	122	86	207	TGGAAACATTTGGTCCCATT	60.029	20	TGAAGCAAAACCCACTGAAA	59.293	20	120	86	205
F01_transcript_18544	3	p2	(TA)8	16	1436	1451	GCCACGATACAAGCTCAACA	59.871	20	GAATTTTATACGCAAACAATGTGG	59.697	24	206	1292	1497	GCCACGATACAAGCTCAACA	59.871	20	GCATTCAAGAATTTTATACGCAAA	59.577	24	214	1292	1505	GCCACGATACAAGCTCAACA	59.871	20	GCATTCAAGAATTTTATACGCAA	58.398	23	214	1292	1505
F01_transcript_18562	1	p3	(CCA)5	15	91	105	CGGCCATCTCACTCTCTCTC	60.096	20	TTGAAGGTTGAGAATTCGGG	60.044	20	115	48	162	CAACTCTCCTGCTGCACAAA	60.175	20	GATGCGGGTGATATTATGGG	60.001	20	116	15	130	CAACTCTCCTGCTGCACAAA	60.175	20	GGATGCGGGTGATATTATGG	60.001	20	117	15	131
F01_transcript_18562	2	p1	(T)10	10	1351	1360	GGAGACACGTCAGAACCCAT	59.969	20	CTCATGCTGAAGACCGTGAA	59.984	20	179	1303	1481	TGGTGACAGTGATTTTGGGA	59.935	20	CTCATGCTGAAGACCGTGAA	59.984	20	273	1209	1481	ACCGACAAGGTGAACTGGAG	60.151	20	CTCATGCTGAAGACCGTGAA	59.984	20	195	1287	1481
F01_transcript_18584	1	p2	(TA)7	14	52	65	CTTTGAACTTTCTGCACACCC	59.766	21	AGACGAGCCCAAGAATCTGA	59.95	20	223	3	225	TGAACTTTCTGCACACCCTTT	59.766	21	AGACGAGCCCAAGAATCTGA	59.95	20	220	6	225	TTTGAACTTTCTGCACACCCT	59.766	21	AGACGAGCCCAAGAATCTGA	59.95	20	222	4	225
F01_transcript_18584	2	p1	(T)15	15	695	709	CTTCTGATCACAGAACTTGTCCA	59.386	23	AGCTGGAATGTACCAAACGC	60.14	20	219	667	885	TTCTGATCACAGAACTTGTCCA	58.342	22	AGCTGGAATGTACCAAACGC	60.14	20	218	668	885	CTTCTGATCACAGAACTTGTCCA	59.386	23	CTGGAATGTACCAAACGCAA	59.585	20	217	667	883
F01_transcript_18586	1	p3	(AGC)5	15	838	852	ACCCTGTCCCTGAAGTGATG	59.962	20	AATGGTAAGTCCAACAGCGG	59.993	20	149	780	928	ACCCTGTCCCTGAAGTGATG	59.962	20	TCAGCTGGTCTCTGAACCCT	59.986	20	109	780	888	GATGGGGAAGGGATTCCTAA	60.089	20	AATGGTAAGTCCAACAGCGG	59.993	20	225	704	928
F01_transcript_18586	2	p2	(TA)26	52	1083	1134	CCGCTGTTGGACTTACCATT	59.993	20	GCCGGTTCGCTATTAGTTTG	59.742	20	261	909	1169	CCGCTGTTGGACTTACCATT	59.993	20	CCGGTTCGCTATTAGTTTGC	59.742	20	260	909	1168	TGGTGGATGTCAGTGTACCG	60.44	20	GCCGGTTCGCTATTAGTTTG	59.742	20	160	1010	1169
F01_transcript_18586	3	p2	(TA)24	48	1294	1341	CAAACTAATAGCGAACCGGC	59.742	20	TTCCCAGCATTTTAGCCTCT	58.928	20	242	1150	1391	CCGACTCTCTCCAGCAAACT	59.598	20	TTCCCAGCATTTTAGCCTCT	58.928	20	256	1136	1391	GGCTCTTTCTAGTTCGCTGG	59.218	20	TTCCCAGCATTTTAGCCTCT	58.928	20	130	1262	1391
F01_transcript_18599	1	p2	(CT)6	12	332	343	AACAAAATCCGCAGAACACC	59.978	20	TTGAGGGAGAGAGAGGTGGA	59.913	20	203	166	368	AACAAAATCCGCAGAACACC	59.978	20	TGGGAAATGAGTTTTGAGGG	59.903	20	216	166	381	AACAAAATCCGCAGAACACC	59.978	20	GAGGAGGAAGAGGAGGAGGA	59.883	20	247	166	412
F01_transcript_18600	1	p2	(CT)19	38	78	115	ATTAAGCCACCACCATCGTC	59.82	20	ACCCATCAAGTACGACCAGG	59.844	20	280	26	305	AAATTAAGCCACCACCATCG	59.823	20	ACGACCAGGGTATCATTTGG	59.67	20	271	24	294	CGAAATTAAGCCACCACCAT	59.823	20	ACGACCAGGGTATCATTTGG	59.67	20	273	22	294
F01_transcript_18600	2	p3	(ATA)5	15	776	790	GAGGGAGGAGTTCATTTCCC	59.874	20	CAATTCAGGAGTCGTGCAAA	59.84	20	280	692	971	GGAGTTCATTTCCCGATTGA	59.871	20	CAATTCAGGAGTCGTGCAAA	59.84	20	274	698	971	ATGATGAGGAAAGCCGAAGA	59.773	20	CAATTCAGGAGTCGTGCAAA	59.84	20	252	720	971
F01_transcript_18600	3	p3	(TAG)6	18	1185	1202	TATTAATCGGGCGTAGACGG	59.943	20	GTGGTGGTTCCGATGAACTC	60.372	20	279	994	1272	TTCGCCTGAAGAAGAGAAGC	59.836	20	GTGGTGGTTCCGATGAACTC	60.372	20	159	1114	1272	ACTGCTCATCCCTGCTTCAT	59.834	20	GTGGTGGTTCCGATGAACTC	60.372	20	179	1094	1272
F01_transcript_18626	1	p4	(TTTA)5	20	1415	1434	ATTTCATGAAGGCTGTTCGG	60.074	20	CCCTCCAAAGGTTTGCATATT	60.19	21	255	1247	1501	ACAGTGCCGATTTTGGAAAG	60.11	20	CCCTCCAAAGGTTTGCATATT	60.19	21	195	1307	1501	AAGGCTGTTCGGAAACTGAA	59.853	20	CCCTCCAAAGGTTTGCATATT	60.19	21	247	1255	1501
F01_transcript_18629	1	c	(TC)6gctctgtatcttcccataaaaccatcgattcttttaaaatccaagatttaccatatttcaccccactccctcctgttatccttttctggaaccag(A)10	117	1133	1249	TGTAACAGGGATGATGGGGT	60.05	20	TCTTCCAATTTCCCACCAAG	59.903	20	261	1045	1305	TGATGGGGTACTTGCTCACA	60.112	20	GAAGAGGAGAAGCCGAAGGT	59.957	20	274	1056	1329	TGATGGGGTACTTGCTCACA	60.112	20	AGAAGAGGAGAAGCCGAAGG	60.088	20	275	1056	1330
F01_transcript_18637	1	p2	(AT)8	16	121	136	GGCCGAGAGAATCGCTTATAC	60.205	21	GCCGCTGAGAAAAATACGTC	59.851	20	235	10	244	GGCCGAGAGAATCGCTTATAC	60.205	21	AGCGGAATCTTGAACCTCCT	60.212	20	257	10	266	GAAATAAAAGGGCCGAGAGAA	59.688	21	GCCGCTGAGAAAAATACGTC	59.851	20	245	0	244
F01_transcript_18637	2	p1	(A)10	10	1320	1329	ATGGTCCGTGGAAGTCAGAG	60.112	20	CAACTTGCTTAGCAGACCTCC	59.135	21	261	1107	1367	GGTCCGTGGAAGTCAGAGAC	59.688	20	CAACTTGCTTAGCAGACCTCC	59.135	21	259	1109	1367	CTTTTCAGAATGGTCCGTGG	60.486	20	CAACTTGCTTAGCAGACCTCC	59.135	21	270	1098	1367
F01_transcript_18641	1	p3	(TTA)7	21	62	82	GTGCATTTCCTCCTCACCAT	59.934	20	GATCCAAGAACAGGGGTTGA	59.903	20	209	12	220	GTGCATTTCCTCCTCACCAT	59.934	20	GGGGCTCTCTGAGATTAGGG	60.169	20	228	12	239	GTTTGGTGCATTTCCTCCTC	59.532	20	GATCCAAGAACAGGGGTTGA	59.903	20	214	7	220
F01_transcript_18641	2	p3	(GAA)7	21	610	630	GTCGACGAGTTCAGCCTTTC	59.997	20	ATTGAGCCCCAAACTCCTCT	60.074	20	252	468	719	TCAGCCTTTCAAACCCAATC	60.051	20	ATTGAGCCCCAAACTCCTCT	60.074	20	242	478	719	GTTCAGCCTTTCAAACCCAA	60.088	20	ATTGAGCCCCAAACTCCTCT	60.074	20	244	476	719
F01_transcript_18657	1	c	(TC)10cctctccctccctcttgctgcagttgaaagcattttggcagatgagagttgcactttctctctctatctattatctatcttttctttac(T)14	123	52	174	AAGCCTCAAACACAACATTTTT	57.853	22	TGCAGATCAAGCAAAGAAGAA	58.785	21	238	0	237	AAGCCTCAAACACAACATTTTT	57.853	22	TGCAGATCAAGCAAAGAAGAAG	59.769	22	238	0	237	AAGCCTCAAACACAACATTTTT	57.853	22	TCCCTGAAAATATGCAGATCAA	59.547	22	250	0	249
F01_transcript_18658	1	p3	(TCT)6	18	132	149	TCATCGCCAATTTGTCTTCA	60.197	20	TAACGCGGGTGTATTTGTCA	59.992	20	123	105	227	TCATCGCCAATTTGTCTTCA	60.197	20	TGGCTTGTTCAGTGTGGAAG	59.873	20	174	105	278	CATCGCCAATTTGTCTTCAA	59.664	20	TAACGCGGGTGTATTTGTCA	59.992	20	122	106	227
F01_transcript_18670	1	p3	(TGA)5	15	1100	1114	CCTAGCTATGAGAGGCGTGG	59.993	20	CGTTGGTGGTGATGCTTATG	59.988	20	141	1018	1158	GAGAGGACTGAGCATGAGGC	60.104	20	CGTTGGTGGTGATGCTTATG	59.988	20	255	904	1158	GCAGGGGGAATATAGGAAGC	59.894	20	CGTTGGTGGTGATGCTTATG	59.988	20	160	999	1158
F01_transcript_18672	1	p1	(A)11	11	32	42	AAACAACGGACTAACAACAGACC	59.485	23	AGATGGAAGACCCGTAACCC	60.19	20	263	3	265	AAACAACGGACTAACAACAGACC	59.485	23	GGGGAGAGAGAGAGGGAAAA	59.749	20	119	3	121	AAACAACGGACTAACAACAGACC	59.485	23	TCTTCCAATGGGGAGAGAGA	59.731	20	238	3	240
F01_transcript_18672	2	p2	(AT)6	12	782	793	TCTGGGGAATAATTGAACCTTTT	60.064	23	ATCCTCAGTGCCATCCATTC	59.893	20	264	680	943	TTCTGGGGAATAATTGAACCTTT	60.064	23	ATCCTCAGTGCCATCCATTC	59.893	20	265	679	943	TTTCTGGGGAATAATTGAACCTT	60.064	23	ATCCTCAGTGCCATCCATTC	59.893	20	266	678	943
F01_transcript_18686	1	p3	(GCG)5	15	249	263	CCCGAAATGCACTTTGTTTT	59.975	20	AATCCGTCAAAGTTCAACCG	59.971	20	276	57	332	CGGAGTAACTGCAAATGGTG	59.195	20	TCCATTTCATTGAAGCCCTC	60.014	20	265	203	467	CGAAATGCACTTTGTTTTGG	59.202	20	AATCCGTCAAAGTTCAACCG	59.971	20	274	59	332
F01_transcript_18695	1	p5	(ACCAT)5	25	25	49	--
F01_transcript_18703	1	p4	(GAGG)5	20	67	86	TCCTTCTTCTTCTTCTGCCG	59.688	20	GACGCAGATCCAACATCTGA	59.794	20	227	40	266	TCCTTCTTCTTCTTCTGCCG	59.688	20	ATCGTTCTTTCGCATCCTTG	60.214	20	247	40	286	TCCTTCTTCTTCTTCTGCCG	59.688	20	GCTTTCGCATGGAAACTGAT	60.221	20	265	40	304
F01_transcript_18709	1	p3	(AAG)6	18	389	406	TCACAGACCAGCAATTCGAG	59.984	20	ATAAAGGGTCCAACCTTGCC	60.187	20	219	363	581	TCACAGACCAGCAATTCGAG	59.984	20	GCTTCTTCATAGGCAACCCA	60.214	20	269	363	631	TCACAGACCAGCAATTCGAG	59.984	20	TCGTAATTGCAAGAGAGCCA	59.566	20	172	363	534
F01_transcript_18718	1	p1	(A)11	11	637	647	GACCGGGATGTATCCAATTTT	59.902	21	GCTATCAAAACGATGTCGCA	59.839	20	277	441	717	CCGGGATGTATCCAATTTTT	58.622	20	GCTATCAAAACGATGTCGCA	59.839	20	275	443	717	GACCGGGATGTATCCAATTT	58.573	20	GCTATCAAAACGATGTCGCA	59.839	20	277	441	717
F01_transcript_18721	1	p3	(GCA)5	15	136	150	GCAGTATCAGCAGCAATGGA	59.979	20	GAGCAAAGCAAGATTGGAGG	59.955	20	263	75	337	GCAGTATCAGCAGCAATGGA	59.979	20	GGAGCAAAGCAAGATTGGAG	59.955	20	264	75	338	AGCAGCAGTATCAGCAGCAA	59.918	20	GAGCAAAGCAAGATTGGAGG	59.955	20	267	71	337
F01_transcript_18744	1	p3	(AAG)8	24	21	44	--
F01_transcript_18744	2	p1	(T)10	10	1333	1342	AAGACGGGGAAAGAGACGTT	60.11	20	GTCGGAATGTACTGCGGAAT	59.962	20	204	1293	1496	AAGACGGGGAAAGAGACGTT	60.11	20	CAGTCACAAGCAGGCACACT	60.096	20	127	1293	1419	AAGACGGGGAAAGAGACGTT	60.11	20	AAAGTCGGAATGTACTGCGG	60.132	20	207	1293	1499
F01_transcript_18753	1	p2	(TA)18	36	1360	1395	GGGAGTATCAAGCGTGTGGT	59.997	20	CCAGTAGTTTTGCCATCCATC	59.443	21	202	1266	1467	ATTGCTGGAGAGAAGGCGTA	59.978	20	CCAGTAGTTTTGCCATCCATC	59.443	21	172	1296	1467	TGCTGGAGAGAAGGCGTAGT	60.156	20	CCAGTAGTTTTGCCATCCATC	59.443	21	170	1298	1467
F01_transcript_18765	1	p2	(AT)7	14	761	774	CTGACCTTCTTGCTTTTGCC	59.993	20	CCTCAGCTTCTTTTGTTGCC	59.993	20	196	636	831	CTGACCTTCTTGCTTTTGCC	59.993	20	CCCTCAGCTTCTTTTGTTGC	59.993	20	197	636	832	CTGACCTTCTTGCTTTTGCC	59.993	20	GGGTTCATCTCCACCTTTGA	59.903	20	171	636	806
F01_transcript_18769	1	p3	(AGC)5	15	887	901	ACCCTGTCCCTGAAGTGATG	59.962	20	AATGGTAAGTCCAACAGCGG	59.993	20	149	829	977	ACCCTGTCCCTGAAGTGATG	59.962	20	TCAGCTGGTCTCTGAACCCT	59.986	20	109	829	937	GATGGGGAAGGGATTCCTAA	60.089	20	AATGGTAAGTCCAACAGCGG	59.993	20	225	753	977
F01_transcript_18769	2	p2	(TA)19	38	1145	1182	CATTTGGAAAGTTCCACGCT	60.11	20	CTGTACCGGCCCTTATCAAA	59.953	20	202	1090	1291	CATTTGGAAAGTTCCACGCT	60.11	20	GATTCCATCCACAGCAACCT	59.934	20	261	1090	1350	CATTTGGAAAGTTCCACGCT	60.11	20	AACCTGTACCGGCCCTTATC	60.208	20	205	1090	1294
F01_transcript_18769	3	p2	(TA)14	28	1354	1381	AGGTTGCTGTGGATGGAATC	59.934	20	CTCAACGATTCCCAGCATTT	60.074	20	109	1331	1439	GATAAGGGCCGGTACAGGTT	60.208	20	CTCAACGATTCCCAGCATTT	60.074	20	165	1275	1439	TGGGATTCCATTCACAACAA	59.75	20	CTCAACGATTCCCAGCATTT	60.074	20	258	1182	1439
F01_transcript_18776	1	p2	(CT)18	36	22	57	--
F01_transcript_18779	1	p3	(AGC)5	15	893	907	ACCCTGTCCCTGAAGTGATG	59.962	20	AATGGTAAGTCCAACAGCGG	59.993	20	149	835	983	ACCCTGTCCCTGAAGTGATG	59.962	20	TCAGCTGGTCTCTGAACCCT	59.986	20	109	835	943	GATGGGGAAGGGATTCCTAA	60.089	20	AATGGTAAGTCCAACAGCGG	59.993	20	225	759	983
F01_transcript_18779	2	p2	(TA)15	30	1138	1167	CCGCTGTTGGACTTACCATT	59.993	20	GCCGGTTCGCTATTAGTTTG	59.742	20	239	964	1202	CCGCTGTTGGACTTACCATT	59.993	20	CCGGTTCGCTATTAGTTTGC	59.742	20	238	964	1201	AGAGACCAGCTGATGACCGT	59.866	20	GCCGGTTCGCTATTAGTTTG	59.742	20	272	931	1202
F01_transcript_18779	3	p2	(TA)7	14	1327	1340	CAAACTAATAGCGAACCGGC	59.742	20	TTCCCAGCATTTTAGCCTCT	58.928	20	208	1183	1390	CCGACTCTCTCCAGCAAACT	59.598	20	TTCCCAGCATTTTAGCCTCT	58.928	20	222	1169	1390	CAAACTAATAGCGAACCGGC	59.742	20	CCCAGCATTTTAGCCTCTACA	59.37	21	206	1183	1388
F01_transcript_18783	1	p1	(A)12	12	1284	1295	GAATTAGGAACAGCCCACCA	59.933	20	TGACATTGGCAAAAGCTCAT	59.276	20	267	1125	1391	GAATTAGGAACAGCCCACCA	59.933	20	CAATTGACATTGGCAAAAGC	59.161	20	271	1125	1395	CCCACCAGTAAGCCTCTTGA	60.246	20	TGACATTGGCAAAAGCTCAT	59.276	20	254	1138	1391
F01_transcript_18805	1	p2	(GA)6	12	43	54	--
F01_transcript_18805	2	p1	(T)10	10	1428	1437	GCAGCCACAGACTTCAATCA	59.992	20	CGAAATTAACATTCTGTTTGGG	58.542	22	113	1350	1462	GCAGCCACAGACTTCAATCA	59.992	20	ACGAAATTAACATTCTGTTTGGG	59.32	23	114	1350	1463	TATGGCAGCCACAGACTTCA	60.413	20	CGAAATTAACATTCTGTTTGGG	58.542	22	117	1346	1462
F01_transcript_18811	1	p3	(AAG)5	15	114	128	TCGGTGATTGCTGGTTAAGA	59.272	20	TTACAAGCTTGGCAACACCA	60.293	20	251	9	259	TCGGTGATTGCTGGTTAAGA	59.272	20	TACAAGCTTGGCAACACCAA	60.293	20	250	9	258	TCGGTGATTGCTGGTTAAGA	59.272	20	CTTGGCAACACCAAAATTCC	60.344	20	244	9	252
F01_transcript_18818	1	c	(CT)7(AT)12	38	2	39	--
F01_transcript_18819	1	p4	(TTTA)5	20	1460	1479	--
F01_transcript_18821	1	p1	(T)12	12	1345	1356	TTGGGCTGCCTGAATATTGT	60.469	20	CAGCATTGTTTCCGATGGAT	60.864	20	195	1195	1389	GTTACTGACTTGGGCTGCCT	59.357	20	CAGCATTGTTTCCGATGGAT	60.864	20	204	1186	1389	TTGGGCTGCCTGAATATTGT	60.469	20	AACTCAGCATTGTTTCCGATG	60.125	21	199	1195	1393
F01_transcript_18822	1	p3	(AGC)5	15	915	929	ACCCTGTCCCTGAAGTGATG	59.962	20	AATGGTAAGTCCAACAGCGG	59.993	20	149	857	1005	ACCCTGTCCCTGAAGTGATG	59.962	20	TCAGCTGGTCTCTGAACCCT	59.986	20	109	857	965	GATGGGGAAGGGATTCCTAA	60.089	20	AATGGTAAGTCCAACAGCGG	59.993	20	225	781	1005
F01_transcript_18822	2	p2	(TA)17	34	1160	1193	CCGCTGTTGGACTTACCATT	59.993	20	GCCGGTTCGCTATTAGTTTG	59.742	20	243	986	1228	CCGCTGTTGGACTTACCATT	59.993	20	CCGGTTCGCTATTAGTTTGC	59.742	20	242	986	1227	AGAGACCAGCTGATGACCGT	59.866	20	GCCGGTTCGCTATTAGTTTG	59.742	20	276	953	1228
F01_transcript_18822	3	p2	(TA)7	14	1353	1366	CAAACTAATAGCGAACCGGC	59.742	20	TTCCCAGCATTTTAGCCTCT	58.928	20	208	1209	1416	CCGACTCTCTCCAGCAAACT	59.598	20	TTCCCAGCATTTTAGCCTCT	58.928	20	222	1195	1416	CAAACTAATAGCGAACCGGC	59.742	20	CCCAGCATTTTAGCCTCTACA	59.37	21	206	1209	1414
F01_transcript_18829	1	p3	(TAC)5	15	156	170	TTAAAACCCCATTCCCTTCC	59.992	20	GTTCGTCGGGATTTGTGAGT	59.973	20	258	43	300	TTAAAACCCCATTCCCTTCC	59.992	20	TTTGGGGCTTCTTTGAATTG	60.046	20	178	43	220	TTAAAACCCCATTCCCTTCC	59.992	20	GACGATGATGGAGGGACAGT	59.928	20	215	43	257
F01_transcript_18842	1	p3	(CAG)5	15	346	360	TATGCAAACGGAAGCTAGGG	60.223	20	CGACAAGCTGCGAAATTGTA	60.014	20	155	254	408	TATGCAAACGGAAGCTAGGG	60.223	20	ATGCAAGCCTTTCTCATGCT	59.985	20	273	254	526	TATGCAAACGGAAGCTAGGG	60.223	20	CCAATCTGCGATTGATGATG	60.033	20	135	254	388
F01_transcript_18849	1	p4	(CTGT)6	24	1377	1400	TATCATTCAACTGCGCAAGC	59.983	20	TCAAGAATTTCATTCATACTGCAAG	59.692	25	256	1209	1464	TCCCCCATCCTATCATTCAA	60.088	20	TCAAGAATTTCATTCATACTGCAAG	59.692	25	266	1199	1464	ATTTTTCAAGATTTCCGGGC	60.26	20	TCAAGAATTTCATTCATACTGCAAG	59.692	25	215	1250	1464
F01_transcript_18862	1	c*	(C)19(CA)9*	36	1403	1438	--
F01_transcript_18863	1	c	(AT)6(AG)6	24	59	82	TGCCTACAATACAAGTCAAGGC	59.294	22	TGTAACCGTCCGTCAATCAA	59.964	20	213	34	246	GAGAGAGAAAGTCGCAGTTCC	58.269	21	TGTAACCGTCCGTCAATCAA	59.964	20	246	1	246	GGAGAGAGAAAGTCGCAGTTC	58.269	21	TGTAACCGTCCGTCAATCAA	59.964	20	247	0	246
F01_transcript_18876	1	p2	(AT)9	18	156	173	CTCACCACTTGCCGATTCTT	60.255	20	CAGTGGAAAAGCAAGCTCAA	59.195	20	223	58	280	ACTCACCACTTGCCGATTCT	59.727	20	CAGTGGAAAAGCAAGCTCAA	59.195	20	224	57	280	CACCACTTGCCGATTCTTTT	60.11	20	TTGGCTCCGAACTAGGAAGT	58.934	20	271	60	330
F01_transcript_18881	1	p1	(A)12	12	36	47	--
F01_transcript_18881	2	p2	(TC)7	14	152	165	GAGAAAGAGAGCCTGGTGGA	59.53	20	TGGACCATAGATTTGCAGAGAA	59.708	22	120	92	211	GGTGGAGCTCGTGTCTCTCT	59.585	20	CAAATGGACCATAGATTTGCAG	59.474	22	110	106	215	GGTGGAGCTCGTGTCTCTCT	59.585	20	AAGAGATCGAAACAAATGGACC	59.465	22	122	106	227
F01_transcript_18885	1	p1	(A)12	12	714	725	GACCGGGATGTATCCAATTTT	59.902	21	AATTTTACGGTCCCTACCCG	60.068	20	237	519	755	GACCGGGATGTATCCAATTTT	59.902	21	GCTATCAAAACGATGTCGCA	59.839	20	277	519	795	CCGGGATGTATCCAATTTTT	58.622	20	AATTTTACGGTCCCTACCCG	60.068	20	235	521	755
F01_transcript_18891	1	p2	(TA)9	18	172	189	CTGCCACAATCCATTCATTC	58.926	20	GGGGAATTGACAAAGCTCAA	60.051	20	247	13	259	CTGCCACAATCCATTCATTC	58.926	20	TTGGGGAATTGACAAAGCTC	60.051	20	249	13	261	TCCACTCCAAAACAACATCCT	59.439	21	TACAGTGTGGGTGCCGATAA	59.988	20	252	100	351
F01_transcript_18906	1	p3	(CAG)5	15	1241	1255	CGGTGATTCTTACTTCCCCA	59.926	20	TTACTTCACGACCAAACCCA	59.021	20	198	1110	1307	TACCCTGACTGTATTGGCCC	59.813	20	TTACTTCACGACCAAACCCA	59.021	20	170	1138	1307	CGGTGATTCTTACTTCCCCA	59.926	20	TTACTTCACGACCAAACCCAC	59.883	21	198	1110	1307
F01_transcript_18907	1	p3	(GGT)5	15	232	246	ATAGGAGCCGAGGGGTTAAA	59.924	20	TACAAACCCCAGAAGCAACC	59.971	20	211	165	375	ATAGGAGCCGAGGGGTTAAA	59.924	20	ATCACTCCACCACCATCCAT	60.056	20	119	165	283	ATAGGAGCCGAGGGGTTAAA	59.924	20	TCTCCAGCCACTACAAACCC	60.111	20	222	165	386
F01_transcript_18911	1	p4	(TTTA)5	20	1304	1323	ACAGTGCCGATTTTGGAAAG	60.11	20	ATCCACGCCAAACTTAATGG	59.823	20	252	1196	1447	ACAGTGCCGATTTTGGAAAG	60.11	20	TGCAAAATACAGATCCACGC	59.694	20	264	1196	1459	ACAGTGCCGATTTTGGAAAG	60.11	20	TCCACGCCAAACTTAATGGT	60.365	20	251	1196	1446
F01_transcript_18915	1	p3	(TGA)5	15	1050	1064	GAGAGGACTGAGCATGAGGC	60.104	20	CGTTGGTGGTGATGCTTATG	59.988	20	257	915	1171	GCAGGGGGAATATAGGAAGC	59.894	20	CGTTGGTGGTGATGCTTATG	59.988	20	162	1010	1171	CCGAGTTACGGGAGACAGAG	59.861	20	CGTTGGTGGTGATGCTTATG	59.988	20	236	936	1171
F01_transcript_18925	1	p3	(TTC)5	15	79	93	GCGTCAAGCATCATTCTCCT	60.37	20	GACGCCATTGAATTGGAACT	59.939	20	142	30	171	AGCGTCAAGCATCATTCTCC	60.37	20	GACGCCATTGAATTGGAACT	59.939	20	143	29	171	AGCGTCAAGCATCATTCTCC	60.37	20	CGCCATTGAATTGGAACTTT	59.938	20	141	29	169
F01_transcript_18928	1	p3	(CCT)11	33	33	65	TTTTTCTTTTCCATTCCCCC	60.102	20	GAAGCAACCCAAATGAAGGA	60.051	20	239	8	246	TTTTTCTTTTCCATTCCCCC	60.102	20	GCAACCCAAATGAAGGAAAA	59.916	20	236	8	243	TTTCTTTTCCATTCCCCCTC	60.237	20	GAAGCAACCCAAATGAAGGA	60.051	20	237	10	246
F01_transcript_18931	1	p2	(AT)23	46	70	115	TACCGCGTTAGAGTTGCAGA	59.632	20	TCTGCGATTCCCATATCCTC	59.998	20	166	21	186	TACCGCGTTAGAGTTGCAGA	59.632	20	GGATGGGGAAAAATGGAGTT	59.996	20	125	21	145	TACCGCGTTAGAGTTGCAGA	59.632	20	GGACCGAATTTGGTTTTTGA	59.778	20	277	21	297
F01_transcript_18931	2	p2	(GT)14	28	1335	1362	TCAAATTCCCACACAAGCAA	60.088	20	GATCAAGGAGGCAGCTCAAC	59.957	20	269	1141	1409	TGAATGAAGTGGCTCACAGG	59.831	20	GATCAAGGAGGCAGCTCAAC	59.957	20	135	1275	1409	TCAAATTCCCACACAAGCAA	60.088	20	TATGTAAGCCCAGCACCACA	60.134	20	246	1141	1386
F01_transcript_18935	1	c	(TC)8tgtgtctctcattaattaacgggtatgaatgattagctatatatacttat(ATAG)5	86	197	282	TTTTCTTGCATTTGCTCTGC	59.186	20	GACCCACCATCGATTTCAAC	60.181	20	278	62	339	TGCATTTGCTCTGCTACCTC	59.178	20	GACCCACCATCGATTTCAAC	60.181	20	272	68	339	TTTTCTTGCATTTGCTCTGCT	60.145	21	GACCCACCATCGATTTCAAC	60.181	20	278	62	339
F01_transcript_18944	1	p1	(T)11	11	1386	1396	GGCAAGGGAAATGTTGAAGA	60.051	20	AAGCACTCCACCCCATAAAT	58.386	20	181	1239	1419	CTTATGGGGCTCTCAGCAAC	59.836	20	AAGCACTCCACCCCATAAAT	58.386	20	263	1157	1419	TGAAGAAACAGGGCTTCACC	60.232	20	AAGCACTCCACCCCATAAAT	58.386	20	167	1253	1419
F01_transcript_18963	1	p3	(ATG)5	15	1038	1052	GAATACCGGAAGCCTAAGCC	60.061	20	TAGAAGGAAAGCATGCCCAC	60.214	20	257	928	1184	CCTAGCTATGAGAGGCGTGG	59.993	20	ATAGAAGGAAAGCATGCCCA	59.668	20	240	946	1185	GCCTAGCTATGAGAGGCGTG	60.14	20	TAGAAGGAAAGCATGCCCAC	60.214	20	240	945	1184
F01_transcript_18965	1	p1	(A)10	10	80	89	TTCAGGTCGTTACGAAACCC	59.971	20	TGCTGAATCTTCTCGCTTCA	59.823	20	232	38	269	TTCAGGTCGTTACGAAACCC	59.971	20	GGTTGCTGAATCTTCTCGCT	59.579	20	235	38	272	TCAGGTCGTTACGAAACCCT	59.592	20	TGCTGAATCTTCTCGCTTCA	59.823	20	231	39	269
F01_transcript_18971	1	p2	(AT)8	16	143	158	CCATTTCCTTCTACAGCACTCA	59.378	22	TCCCCTTTTCTGTAGCTCAA	57.549	20	263	75	337	CCATTTCCTTCTACAGCACTCA	59.378	22	AATCCCCTTTTCTGTAGCTCAA	59.264	22	265	75	339	CCATTTCCTTCTACAGCACTCA	59.378	22	TTGGTTAAATCCCCTTTTCTG	58.101	21	272	75	346
F01_transcript_18980	1	p3	(TGG)7	21	998	1018	TTTTCCATTTCTTTCACGCC	60.053	20	ATTCCCAGTCGAAGGGTTCT	59.935	20	268	889	1156	TTTTCCATTTCTTTCACGCC	60.053	20	CGGACCGTCAGAATCTTCAT	60.073	20	199	889	1087	ATTTCTTTCACGCCCAGATG	60.074	20	ATTCCCAGTCGAAGGGTTCT	59.935	20	262	895	1156
F01_transcript_18987	1	p2	(GA)6	12	111	122	CAACTGAACGGAACTGGTGA	59.72	20	AGAGCAGGAGGAGGAGAAGG	60.088	20	240	5	244	CAACTGAACGGAACTGGTGA	59.72	20	AGGAGGAGAAGGGAGAGTGG	59.801	20	232	5	236	CAACTGAACGGAACTGGTGA	59.72	20	TCAGAGCAGGAGGAGGAGAA	60.214	20	242	5	246
F01_transcript_18987	2	p3	(GCA)6	18	1022	1039	GGTGATGCGGTAAAGATGCT	60.103	20	AGGGAATCTCCAACTTCGGT	59.935	20	259	903	1161	GGTGATGCGGTAAAGATGCT	60.103	20	CCTTGAATGCGGACAAGTTT	60.11	20	233	903	1135	GGTGATGCGGTAAAGATGCT	60.103	20	TTCACCACCCAAGTAAAGGG	59.824	20	275	903	1177
F01_transcript_18996	1	p1	(T)12	12	1288	1299	GCCAGGTTCTTGAAGACTGC	59.997	20	AACACATGCCAAATAGGCAAC	59.881	21	178	1151	1328	GAGAAGACCCCGATTTCACA	60.05	20	AACACATGCCAAATAGGCAAC	59.881	21	138	1191	1328	CCTATGGCCATTTTGGAAGA	59.894	20	AACACATGCCAAATAGGCAAC	59.881	21	156	1173	1328
F01_transcript_19011	1	p1	(T)10	10	1494	1503	--
F01_transcript_19014	1	p3	(GCT)5	15	1079	1093	ACTTCCCTATCATTGGCCCT	59.789	20	GCTGAAACCCAGGTCATCAT	59.934	20	279	871	1149	ACTTCCCTATCATTGGCCCT	59.789	20	TCATCAGCAGGCTCTTCCTT	60.096	20	254	871	1124	ACTTCCCTATCATTGGCCCT	59.789	20	TTCATCAGCAGGCTCTTCCT	60.096	20	255	871	1125
F01_transcript_19020	1	p3	(CTC)6	18	226	243	CCACCATCATCCGTCTCTCT	60.072	20	CGAGGGTAGGTGAGAAGCTG	60.005	20	177	173	349	ACCACCATCATCCGTCTCTC	59.928	20	CGAGGGTAGGTGAGAAGCTG	60.005	20	178	172	349	CCTTGCTGTTCTCAAGCCTC	60.134	20	CGAGGGTAGGTGAGAAGCTG	60.005	20	270	80	349
F01_transcript_19020	2	p3	(TGA)6	18	1054	1071	GCTTGTTTAGGTCTGCTGCC	60.022	20	AATTCGTTCATTCGCTCCAG	60.214	20	138	986	1123	GGCTTGTTTAGGTCTGCTGC	60.022	20	AATTCGTTCATTCGCTCCAG	60.214	20	139	985	1123	GCTTGTTTAGGTCTGCTGCC	60.022	20	ATTCGTTCATTCGCTCCAGT	59.7	20	137	986	1122
F01_transcript_19020	3	p6	(TGGCAA)5	30	1213	1242	TGAGTGTGTTCGTTTTTGGG	59.585	20	CCTGCTTGCTTCTCCAAGAC	60.134	20	267	1147	1413	TGAGTGTGTTCGTTTTTGGG	59.585	20	GCTCTTTTGAATGCCTGCTT	59.597	20	280	1147	1426	ACTGGAGCGAATGAACGAAT	59.7	20	TCCCCTCAAGGGATCAAAAT	60.632	20	208	1103	1310
F01_transcript_19023	1	p3	(GAG)7	21	273	293	ACCCACCTCAAGAACGTTTG	60.005	20	CCAAAAAGCCTAACCATCCA	59.931	20	208	179	386	GCAATTGGTGTTGTTTCGTG	60.011	20	CCAAAAAGCCTAACCATCCA	59.931	20	182	205	386	ACCCACCTCAAGAACGTTTG	60.005	20	ACTGCCACCACCAATAGGAC	59.851	20	276	179	454
F01_transcript_19033	1	p2	(GA)11	22	282	303	TGGAGAAGGGGTGAGATTTG	60.042	20	TGGAAGACTCGGGAAGAAGA	59.92	20	153	236	388	TGGAGAAGGGGTGAGATTTG	60.042	20	TGAGGGGTTGAAGAATTTGG	59.903	20	170	236	405	TGGAGAAGGGGTGAGATTTG	60.042	20	TTTGGAAGACTCGGGAAGAA	59.784	20	155	236	390
F01_transcript_19033	2	p4	(GATA)9	36	1333	1368	TGTTTGACGGAAACACCAAA	59.981	20	TGCATTTCATTTGGGAATTG	59.353	20	182	1268	1449	TGTTTGACGGAAACACCAAA	59.981	20	TTTCATTTGGGAATTGAACCA	60.153	21	178	1268	1445	TGTTTGACGGAAACACCAAA	59.981	20	TTCATTTGGGAATTGAACCAA	60.153	21	177	1268	1444
F01_transcript_19034	1	p1	(T)11	11	1486	1496	--
F01_transcript_19041	1	p2	(CT)6	12	123	134	GGTTTCCTTCGAACTTGCAG	59.853	20	TTTCACAAGCTGAAAGCCCT	59.993	20	220	71	290	GGTTTCCTTCGAACTTGCAG	59.853	20	AGGAACTTCAAAGGGGAGGA	60.045	20	119	71	189	CCTTTTTCTCTCCAAGGGCT	59.821	20	AGGAACTTCAAAGGGGAGGA	60.045	20	158	32	189
F01_transcript_19044	1	p3	(AAG)7	21	55	75	CTCTACCATTTTCCCTGGCA	60.066	20	ATCAGCTAAAGCGGAGGACA	59.978	20	148	21	168	CTCTACCATTTTCCCTGGCA	60.066	20	CATCAGCTAAAGCGGAGGAC	59.978	20	149	21	169	CTCTACCATTTTCCCTGGCA	60.066	20	TTTTACAATGCCCACACCAA	59.826	20	246	21	266
F01_transcript_19044	2	p1	(T)10	10	1366	1375	AGAGCTTGGGGAATGTACCA	59.55	20	GTAATGCATTTAAAGGAGTTTTCC	57.5	24	154	1250	1403	CAGAGCTTGGGGAATGTACC	59.55	20	GTAATGCATTTAAAGGAGTTTTCC	57.5	24	155	1249	1403	AGAGCTTGGGGAATGTACCA	59.55	20	AGTAATGCATTTAAAGGAGTTTTCC	58.36	25	155	1250	1404
F01_transcript_19052	1	p5	(CAGTT)5	25	86	110	GTAGCCGTCCAGGGTTTGTA	59.993	20	CAAAAGACACAATTGGGGTG	58.871	20	238	44	281	TGACAACTGTAGCCGTCCAG	59.897	20	CAAAAGACACAATTGGGGTG	58.871	20	246	36	281	CCGTCCAGGGTTTGTAAGTG	60.401	20	CAAAAGACACAATTGGGGTG	58.871	20	234	48	281
F01_transcript_19054	1	p3	(AGT)5	15	22	36	--
F01_transcript_19054	2	p1	(T)19	19	1417	1435	TGGCGATGAAGAGTGACTTG	59.984	20	TGATGTGCGAGCTTTCATTG	60.958	20	265	1221	1485	TGGAGGAATGAGTACCCTCG	60.065	20	TGATGTGCGAGCTTTCATTG	60.958	20	156	1330	1485	TGACTGCATGTTGGAAGAGG	59.831	20	TGATGTGCGAGCTTTCATTG	60.958	20	226	1260	1485
F01_transcript_19057	1	p2	(TC)6	12	36	47	CAATTTCAGTGATCCCCAGG	60.309	20	CGCACACACTCTCCTCTCTG	59.757	20	184	12	195	CAATTTCAGTGATCCCCAGG	60.309	20	AACTCAAAGCGCCAATTGTT	59.752	20	236	12	247	CAATTTCAGTGATCCCCAGG	60.309	20	ACTCAAAGCGCCAATTGTTC	60.257	20	235	12	246
F01_transcript_19067	1	p1	(T)10	10	1275	1284	TGCTCTACCTGGAGCGAAGT	60.156	20	TCAACATGGAAAATCTCTCAGTG	59.228	23	205	1133	1337	TGCTCTACCTGGAGCGAAGT	60.156	20	AACATGGAAAATCTCTCAGTGG	58.174	22	203	1133	1335	TGCTCTACCTGGAGCGAAGT	60.156	20	CAACATGGAAAATCTCTCAGTGG	60.889	23	204	1133	1336
F01_transcript_19069	1	p2	(AT)22	44	17	60	--
F01_transcript_19074	1	p1	(C)16	16	783	798	AAAGCTAGCACCAGAGGCAG	59.78	20	TGCAGGTCCTGTGTCTTCAC	59.872	20	240	746	985	AAAGCTAGCACCAGAGGCAG	59.78	20	TGCCTAGATTCCCCTCACTG	60.21	20	274	746	1019	GGGCTTGAAGCTGCTAGAGA	59.859	20	CCTCATCAACAACTCGTCCA	59.676	20	273	639	911
F01_transcript_19084	1	p1	(T)10	10	1260	1269	GGTTCAAGCGGGAGTTCATA	60.074	20	ACAACAGGGGAAGAACATGC	59.973	20	214	1163	1376	GGTTCAAGCGGGAGTTCATA	60.074	20	TTCCACAACAGGGGAAGAAC	59.943	20	218	1163	1380	GGTTCAAGCGGGAGTTCATA	60.074	20	GGAAAAAGGACAGCCCTACC	59.94	20	266	1163	1428
F01_transcript_19095	1	p2	(CT)6	12	80	91	AGCTTTCCCAACAAAACCCT	59.976	20	GGTTGGGTATTGCTGCTGTT	60	20	126	2	127	AGCTTTCCCAACAAAACCCT	59.976	20	GTAGGAGTATTGGGCCGTGA	59.955	20	245	2	246	AGCTTTCCCAACAAAACCCT	59.976	20	CCGGCATCTGGTCTATGTCT	60.096	20	270	2	271
F01_transcript_19095	2	p6	(CAACAG)5	30	1130	1159	AACAGAGCTTTACCGCCTCA	60.015	20	CCTCTGATTGAAGTCTGCGA	59.112	20	195	1051	1245	TCAACAGAGCTTTACCGCCT	60.015	20	CCTCTGATTGAAGTCTGCGA	59.112	20	197	1049	1245	CAACAGAGCTTTACCGCCTC	60.015	20	CCTCTGATTGAAGTCTGCGA	59.112	20	196	1050	1245
F01_transcript_19096	1	p1	(A)11	11	1322	1332	GAAGGAACCAAGACCCAACA	59.943	20	ACCACACACCAACACCAAAA	59.745	20	228	1142	1369	GAAGGAACCAAGACCCAACA	59.943	20	AACACCAAAAACCCACCAAG	59.728	20	218	1142	1359	GAAGGAACCAAGACCCAACA	59.943	20	CACCAAAAACCCACCAAGTT	59.728	20	216	1142	1357
F01_transcript_19103	1	p3	(AAG)5	15	114	128	TCGGTGATTGCTGGTTAAGA	59.272	20	TTACAAGCTTGGCAACACCA	60.293	20	251	9	259	TCGGTGATTGCTGGTTAAGA	59.272	20	TACAAGCTTGGCAACACCAA	60.293	20	250	9	258	TCGGTGATTGCTGGTTAAGA	59.272	20	CTTGGCAACACCAAAATTCC	60.344	20	244	9	252
F01_transcript_19109	1	p2	(TA)13	26	14	39	--
F01_transcript_19113	1	p2	(GA)6	12	54	65	ATCAAGATTCCTTCCCCCAC	60.133	20	GAGTTGTGACCGTTGGAACC	60.408	20	147	29	175	ATCAAGATTCCTTCCCCCAC	60.133	20	CATAGGATCCACCTTGACGC	60.483	20	256	29	284	ATCAAGATTCCTTCCCCCAC	60.133	20	GCGGACACCAAACAACATTA	59.444	20	238	29	266
F01_transcript_19113	2	p1	(T)14	14	1262	1275	GATGCTTGTGTGTTTGCCCT	61.107	20	TCTCCACCAGTACCCTCCAC	59.962	20	184	1239	1422	AGATGCTTGTGTGTTTGCCC	61.107	20	TCTCCACCAGTACCCTCCAC	59.962	20	185	1238	1422	GATGCTTGTGTGTTTGCCC	60.112	19	TCTCCACCAGTACCCTCCAC	59.962	20	184	1239	1422
F01_transcript_19124	1	c	(AG)6atatgtcatgacatataatccatcaaaggta(AT)6	55	604	658	AAGGATGCATTCCAAGATGC	60.043	20	TGTCATCTGGTTTTGCTTGA	57.806	20	269	423	691	AGATTCTTTTTATCCGGGGC	59.402	20	TTTCTTACACGGAAAGCAGC	58.174	20	213	507	719	GATTCTTTTTATCCGGGGCT	59.402	20	TTTCTTACACGGAAAGCAGC	58.174	20	212	508	719
F01_transcript_19127	1	p2	(TC)6	12	60	71	AAAATCCCCCACTGCTTCTT	59.94	20	AGGTTGTAACGGTGCCACTC	60.035	20	163	36	198	AAAATCCCCCACTGCTTCTT	59.94	20	GAGGTTGTAACGGTGCCACT	60.035	20	164	36	199	AAAAATCCCCCACTGCTTCT	59.94	20	AGGTTGTAACGGTGCCACTC	60.035	20	164	35	198
F01_transcript_19134	1	c	(GA)10a(AG)6	33	6	38	--
F01_transcript_19171	1	p2	(GA)11	22	36	57	GGAGAACCAAAACAGAATAACCA	59.403	23	GCTTTCTTTATGTCCGCGAG	59.982	20	218	0	217	GGAGAACCAAAACAGAATAACCA	59.403	23	ATTGAAACAATGGGGTGGAA	60.029	20	240	0	239	GGAGAACCAAAACAGAATAACCA	59.403	23	TTGAAACAATGGGGTGGAAT	60.029	20	239	0	238
F01_transcript_19171	2	p1	(A)20	20	1468	1487	--
F01_transcript_19182	1	c*	(TCC)5(CT)10*	34	53	86	TGGTACCCCTTTGTCTTTGC	59.971	20	TCCATCCATTCACCAACAAA	59.75	20	215	28	242	CCCTGGTACCCCTTTGTCTT	60.218	20	TCCATCCATTCACCAACAAA	59.75	20	218	25	242	TGGTACCCCTTTGTCTTTGC	59.971	20	GTCCATCCATTCACCAACAA	59.193	20	216	28	243
F01_transcript_19190	1	p2	(TC)7	14	82	95	TTCTCATTCTTCAAACATTGCTG	59.393	23	CCCAGAAGCCAAAACAAGAA	60.22	20	262	22	283	TTCTCATTCTTCAAACATTGCTG	59.393	23	ACCCAGAAGCCAAAACAAGA	59.711	20	263	22	284	TCTCATTCTTCAAACATTGCTG	58.027	22	CCCAGAAGCCAAAACAAGAA	60.22	20	261	23	283
F01_transcript_19196	1	c	(AT)11aggggttccatccacaacaaccgtctgtggagcaaccccttttttggcctgttga(T)17attccagccgaaatttcaacaggccaaaaaaggttgtttcacagttgctgtggatggaacccac(AT)18	194	1153	1346	--
F01_transcript_19216	1	p3	(TAA)16	48	1283	1330	TCCTCTGCCATTTTCCAATC	60.014	20	AATCAAGCCAAAACTCCACG	60.11	20	279	1115	1393	TGCCATTTTCCAATCAACAA	59.907	20	AATCAAGCCAAAACTCCACG	60.11	20	274	1120	1393	TCCTCTGCCATTTTCCAATC	60.014	20	CAAAACTCCACGCTGGTACA	59.758	20	271	1115	1385
F01_transcript_19221	1	c	(CCA)9cctccaccacctatacctataccccatatccatcttctactccttcctctcacttcaaaaaaccaca(CTT)6	112	164	275	GAGTCTTATCCGAAGCGCAG	60.118	20	GTGCGAAGGAGAGAAGTTGG	59.989	20	279	80	358	GAGTCTTATCCGAAGCGCAG	60.118	20	TATTCTGCATTTTCCGAGGG	60.031	20	226	80	305	AACAGGAGAGAATGGAGGCA	59.803	20	GTGCGAAGGAGAGAAGTTGG	59.989	20	238	121	358
F01_transcript_19236	1	c	(AT)9acacagaagaagaacataaatctcttgtaaaggaatctgaatctgtatgtaaacatatacactatatacg(TA)6	100	51	150	AGGCCACCAAACAAACACAT	60.277	20	AACAAAAATCAAGCGAACGG	60.11	20	263	9	271	GAAGGCCACCAAACAAACAC	60.397	20	AACAAAAATCAAGCGAACGG	60.11	20	265	7	271	AGGCCACCAAACAAACACAT	60.277	20	ACGGTTCTTGAGAAAATGCG	60.249	20	247	9	255
F01_transcript_19245	1	p5	(AGAAG)5	25	1	25	--
F01_transcript_19245	2	p3	(TTG)6	18	1348	1365	CATTGCGTTGCATTCAATTT	59.567	20	ATTCCAGCCTCCACAGAATG	60.073	20	217	1212	1428	ACGCGTGGTCATTTTTGACT	60.559	20	ATTCCAGCCTCCACAGAATG	60.073	20	189	1240	1428	TGAATCTCAGCGGGTTTTGT	60.636	20	ATTCCAGCCTCCACAGAATG	60.073	20	169	1260	1428
F01_transcript_19248	1	p3	(AGC)6	18	82	99	CCAGAACCAGAACCAGAAGC	59.844	20	TTTGAAGGGTTTGGATGAGG	59.903	20	280	58	337	CCAGAACCAGAACCAGAAGC	59.844	20	GAGGGATTTGAGGTTGGTGA	59.903	20	264	58	321	GACTGGTCGTCGTGGAGAAT	60.12	20	CAAGTGGTGGGAAGCTTGTT	60.149	20	184	3	186
F01_transcript_19255	1	p3	(AGC)6	18	108	125	CCAGAACCAGAACCAGAAGC	59.844	20	TTTGAAGGGTTTGGATGAGG	59.903	20	280	84	363	CCAGAACCAGAACCAGAAGC	59.844	20	GAGGGATTTGAGGTTGGTGA	59.903	20	264	84	347	GACTGGTCGTCGTGGAGAAT	60.12	20	CAAGTGGTGGGAAGCTTGTT	60.149	20	184	29	212
F01_transcript_19262	1	p3	(AGA)5	15	17	31	--
F01_transcript_19262	2	p3	(TCC)6	18	224	241	TCCCATACCCTAACCCTTCC	60.011	20	TGATCAAACACAGCCTCTGC	59.992	20	185	199	383	AAAGTGTGGGTGGGTGAGAG	60.002	20	AGAACGAGATTGGAGGGGTT	59.935	20	212	62	273	AGAAAGTGTGGGTGGGTGAG	60.002	20	AGAACGAGATTGGAGGGGTT	59.935	20	214	60	273
F01_transcript_19272	1	p2	(AC)7	14	1	14	--
F01_transcript_19275	1	p2	(CT)6	12	1461	1472	--
F01_transcript_19281	1	p1	(A)12	12	1425	1436	--
F01_transcript_19284	1	p3	(AAT)6	18	1200	1217	GGAGTTACAGAGCGCGATTC	59.985	20	CATCAAACCTCATTACCAACCA	59.724	22	150	1123	1272	GCATTGCAAGAATTCCATGA	59.628	20	CATCAAACCTCATTACCAACCA	59.724	22	117	1156	1272	GGAGTTACAGAGCGCGATTC	59.985	20	CATCAAACCTCATTACCAACCAT	59.994	23	150	1123	1272
F01_transcript_19297	1	p3	(CGG)5	15	404	418	TCCCTTTTCATTCCCTTCCT	59.875	20	GTCACCCCAAGCTTCGATTA	60.074	20	192	284	475	TCCCTTTTCATTCCCTTCCT	59.875	20	GCTCCTTCACTCCAGCAGTC	60.143	20	161	284	444	TCATCTCCGGCGTACCTTAG	60.227	20	GTCACCCCAAGCTTCGATTA	60.074	20	159	317	475
F01_transcript_19297	2	p3	(TGG)5	15	885	899	GTGGTGGTGCAAGAGAGGAT	60.12	20	CATATTCATCCGCTGGACCT	59.917	20	240	849	1088	GGCTGAACTCTAGTGGCTCG	60.156	20	CATATTCATCCGCTGGACCT	59.917	20	276	813	1088	CGAGGCTGAACTCTAGTGGC	60.156	20	CATATTCATCCGCTGGACCT	59.917	20	279	810	1088
F01_transcript_19307	1	p3	(GTG)5	15	770	784	TGTCAGTCGTCGAGGTGAAG	60.022	20	ACCACCAAGTTGTTGAAGGG	59.861	20	251	640	890	TGTCAGTCGTCGAGGTGAAG	60.022	20	CACCAAGTTGTTGAAGGGCT	60.149	20	249	640	888	GTAATGGCGGTGCTTTTCAT	59.967	20	ACCACCAAGTTGTTGAAGGG	59.861	20	224	667	890
F01_transcript_19310	1	p2	(TA)6	12	1070	1081	CTGGCACAAAGGGTGAGATT	60.111	20	TTACAACAGCAAAAAGGGGG	59.968	20	262	977	1238	CTGGCACAAAGGGTGAGATT	60.111	20	AGCTTGCAAAAAGCCCATAA	59.853	20	205	977	1181	CTGGCACAAAGGGTGAGATT	60.111	20	AAGCTTGCAAAAAGCCCATA	59.853	20	206	977	1182
F01_transcript_19322	1	p3	(TTG)6	18	1314	1331	ACGCGAGGTCATTTTTGACT	59.74	20	ATTCCAGCCTCCACAGAATG	60.073	20	198	1205	1402	TGCACCAGAGAGTGGTCAGT	59.442	20	ATTCCAGCCTCCACAGAATG	60.073	20	151	1252	1402	TGAATCTCAGCGGGTTTTGT	60.636	20	ATTCCAGCCTCCACAGAATG	60.073	20	178	1225	1402
F01_transcript_19323	1	p2	(TA)6	12	123	134	ACAGCAGAGGGAGTGAAGGA	59.986	20	TGATCGATCCTTTCTTTCGG	60.148	20	232	8	239	CGACCAAAAGCAAAACCCTA	60.103	20	TAAGCTTGAGGGGCTTCTGA	60.088	20	276	60	335	CGACCAAAAGCAAAACCCTA	60.103	20	TGATCGATCCTTTCTTTCGG	60.148	20	180	60	239
F01_transcript_19333	1	p2	(AT)21	42	1223	1264	TCCGAAGAATCTGACGAACC	60.195	20	TGGGTCTTATGTTTGGTGAGC	59.985	21	240	1188	1427	TCCGAAGAATCTGACGAACC	60.195	20	TGGGTCTCAAAACCGATCA	60.031	19	203	1188	1390	GCCTTGTCCGAAGAATCTGA	60.34	20	TGGGTCTTATGTTTGGTGAGC	59.985	21	246	1182	1427
F01_transcript_19340	1	p2	(AG)24	48	61	108	CAAGCTCCCATTTTGTACTCTG	58.904	22	TTGAGCCATGAGAAGCACAC	59.992	20	184	2	185	CAAGCTCCCATTTTGTACTCTGT	59.703	23	TTGAGCCATGAGAAGCACAC	59.992	20	184	2	185	ACAAGCTCCCATTTTGTACTCTG	59.703	23	TTGAGCCATGAGAAGCACAC	59.992	20	185	1	185
F01_transcript_19345	1	p1	(T)10	10	1287	1296	TGCTCTACCTGGAGCGAAGT	60.156	20	TCAACATGGAAAATCTCTCAGTG	59.228	23	206	1145	1350	TGCTCTACCTGGAGCGAAGT	60.156	20	AACATGGAAAATCTCTCAGTGG	58.174	22	204	1145	1348	TGCTCTACCTGGAGCGAAGT	60.156	20	CAACATGGAAAATCTCTCAGTGG	60.889	23	205	1145	1349
F01_transcript_19355	1	p3	(ATG)10	30	926	955	CTTCAACAATCAGCCCCTGT	60.111	20	TTGGCATCATCGTCATCACT	60.08	20	197	822	1018	ACTTCAACAATCAGCCCCTG	60.111	20	TTGGCATCATCGTCATCACT	60.08	20	198	821	1018	CTTCAACAATCAGCCCCTGT	60.111	20	CCAGCACCTTCACAAACAGA	59.873	20	278	822	1099
F01_transcript_19356	1	c	(AC)7(AT)22	58	2	59	--
F01_transcript_19373	1	p3	(TGG)7	21	940	960	TTTTCCATTTCTTTCACGCC	60.053	20	ATTCCCAGTCGAAGGGTTCT	59.935	20	268	831	1098	TTTTCCATTTCTTTCACGCC	60.053	20	CGGACCGTCAGAATCTTCAT	60.073	20	199	831	1029	ATTTCTTTCACGCCCAGATG	60.074	20	ATTCCCAGTCGAAGGGTTCT	59.935	20	262	837	1098
F01_transcript_19398	1	p1	(T)10	10	527	536	CAGAGCAGGTGAGCAAACTG	59.77	20	GACCACCTGAAGAGCAGGAG	59.986	20	245	391	635	CAGAGCAGGTGAGCAAACTG	59.77	20	TCACGTGACCACCTGAAGAG	59.864	20	251	391	641	CAGAGCAGGTGAGCAAACTG	59.77	20	CTCACGTGACCACCTGAAGA	59.864	20	252	391	642
F01_transcript_19423	1	p1	(A)10	10	624	633	GACCGGGATGTATCCAATTTT	59.902	21	AATTTTACGGTCCCTACCCG	60.068	20	234	430	663	GACCGGGATGTATCCAATTTT	59.902	21	GCTATCAAAACGATGTCGCA	59.839	20	274	430	703	CCGGGATGTATCCAATTTTT	58.622	20	AATTTTACGGTCCCTACCCG	60.068	20	232	432	663
F01_transcript_19434	1	p2	(AT)17	34	69	102	GATGATCAAAGACCCGAAGG	59.483	20	CCGATAGGAGGAATTTGTGC	59.528	20	179	17	195	AGACCCGAAGGCATCATTTT	60.826	20	CCGATAGGAGGAATTTGTGC	59.528	20	170	26	195	AAGACCCGAAGGCATCATTT	60.826	20	CCGATAGGAGGAATTTGTGC	59.528	20	171	25	195
F01_transcript_19434	2	p3	(GGA)5	15	1317	1331	TGCTCACAGTTGGGATTCTG	59.831	20	TTGAAAGTTGTACACTCACTACAAAAA	58.532	27	223	1158	1380	TCACAGTTGGGATTCTGCAA	60.24	20	TTGAAAGTTGTACACTCACTACAAAAA	58.532	27	220	1161	1380	TGTGCTCACAGTTGGGATTC	59.682	20	TTGAAAGTTGTACACTCACTACAAAAA	58.532	27	225	1156	1380
F01_transcript_19436	1	p2	(TA)9	18	146	163	AATTTCCTCAGAGCAGCCAA	59.955	20	CAAATCCATCGTCCGTCTTT	59.933	20	145	59	203	CCGTCCTTCATTAGGTTCCA	59.926	20	CAAATCCATCGTCCGTCTTT	59.933	20	182	22	203	AATTTCCTCAGAGCAGCCAA	59.955	20	CTGCCCTTCTTTCACCTTTG	59.846	20	178	59	236
F01_transcript_19438	1	c	(GT)13(AT)19	64	1252	1315	TGAACAGACAAGGTCCACCA	60.129	20	CCCACGAACAAATCATTTCA	59.371	20	253	1109	1361	CCACCAGAACAAACTGCAAA	59.734	20	CCCACGAACAAATCATTTCA	59.371	20	239	1123	1361	TCCACCAGAACAAACTGCAA	60.278	20	CCCACGAACAAATCATTTCA	59.371	20	240	1122	1361
F01_transcript_19440	1	c	(AT)22aggggttccatccacaacaaccgtatgtggagcaaccccttttttggcctgttga(T)19attccagccgaaatttcaacaggccaaaaaaggttgtttcacagttgctgtggatggaacccacacac(AT)18	222	1159	1380	--
F01_transcript_19443	1	p3	(AAC)9	27	184	210	TGCGAGATGTTGGTTAGCAG	60.011	20	TTCATCAGGTTGAGACGCAG	59.984	20	276	86	361	CTGCGAGATGTTGGTTAGCA	60.011	20	TTCATCAGGTTGAGACGCAG	59.984	20	277	85	361	TGCGAGATGTTGGTTAGCAG	60.011	20	GAGATCGATGGAGGGAATGA	59.971	20	181	86	266
F01_transcript_19443	2	p1	(A)14	14	1124	1137	TGAAGGAATGACGTGGTTGA	60.088	20	AAATTCACCACCACCTTTGC	59.836	20	240	1016	1255	TTGTGAAAAACAAGGCTCCC	60.088	20	AAATTCACCACCACCTTTGC	59.836	20	203	1053	1255	TGAAGGAATGACGTGGTTGA	60.088	20	TGGCACGGTCATCATAACAT	59.805	20	162	1016	1177
F01_transcript_19451	1	p3	(ACC)5	15	104	118	ACTCACACCTCACCGGAATC	59.969	20	AAGCTGGAAGTTGGAAAGCA	59.993	20	244	52	295	ACTCACACCTCACCGGAATC	59.969	20	AAGCCAACGACATGTTTTCC	59.978	20	184	52	235	ACTCACACCTCACCGGAATC	59.969	20	CCGAAAGTCAAAAATCCGAA	60.046	20	166	52	217
F01_transcript_19452	1	p1	(T)14	14	767	780	GCACTTCATTTCTTGGTGTCAA	60.154	22	CCCCCGGATCATTAGATAGG	60.482	20	202	694	895	AGCACTTCATTTCTTGGTGTCA	59.78	22	CCCCCGGATCATTAGATAGG	60.482	20	203	693	895	GCACTTCATTTCTTGGTGTCA	58.763	21	CCCCCGGATCATTAGATAGG	60.482	20	202	694	895
F01_transcript_19472	1	c	(C)12acccacccca(CCCCAC)5	52	1305	1356	TGCAAAAATGATGGGGAAAT	60.132	20	TATGCGTACATGCCAATGCT	60.126	20	164	1242	1405	ATTGCAAAAATGATGGGGAA	60.132	20	TATGCGTACATGCCAATGCT	60.126	20	166	1240	1405	AATTGCAAAAATGATGGGGA	60.132	20	TATGCGTACATGCCAATGCT	60.126	20	167	1239	1405
F01_transcript_19473	1	p4	(GTCC)5	20	157	176	ATTGTCCCCAATTGCAAAAA	60.167	20	TGATTGTGTTCCATCCCTCA	59.893	20	188	64	251	TTGTCCCCAATTGCAAAAAT	60.167	20	TGATTGTGTTCCATCCCTCA	59.893	20	187	65	251	GTTTTCCCCTCTGTCCCAAT	60.169	20	TGATTGTGTTCCATCCCTCA	59.893	20	211	41	251
F01_transcript_19479	1	p1	(T)10	10	1415	1424	TTGCAAGGAAGGAAGGTGTC	60.232	20	TCAAATTCAGGAAGTTCCAACA	59.587	22	234	1243	1476	TCTTGCAAGGAAGGAAGGTG	60.366	20	TCAAATTCAGGAAGTTCCAACA	59.587	22	236	1241	1476	CCATGATCAATTGAGCGGTA	59.499	20	TCAAATTCAGGAAGTTCCAACA	59.587	22	263	1214	1476
F01_transcript_19505	1	p3	(CAT)5	15	271	285	CCATCAGTTTCACGTCCCTT	59.966	20	CGGTGACAGCAGCAATAAGA	60.011	20	214	155	368	AACCCCCAGTTATCCAAACC	59.919	20	CGGTGACAGCAGCAATAAGA	60.011	20	161	208	368	CATCGTCCATCAGTTTCACG	60.112	20	CGGTGACAGCAGCAATAAGA	60.011	20	220	149	368
F01_transcript_19521	1	p2	(TA)12	24	47	70	ACGTAGTTCTCTTACTTCTGATTGC	57.505	25	GATGCAGGTGGGAGATTGTT	59.934	20	240	19	258	ACGTAGTTCTCTTACTTCTGATTGC	57.505	25	ACTTCTGATGCAGGTGGGAG	60.261	20	246	19	264	ACGTAGTTCTCTTACTTCTGATTGC	57.505	25	GCCAACAGATTCTACCCCTG	59.55	20	199	19	217
F01_transcript_19522	1	p1	(A)12	12	538	549	ATTGTCGGATTAGCGGATTG	59.923	20	AAAGGAGAAGAGGGCCTTTG	59.821	20	189	410	598	CATTGTCGGATTAGCGGATT	59.923	20	AAAGGAGAAGAGGGCCTTTG	59.821	20	190	409	598	CCGACTTATCTTCCCTTCCC	59.897	20	AAAGGAGAAGAGGGCCTTTG	59.821	20	209	390	598
F01_transcript_19525	1	p2	(TA)10	20	1330	1349	TTTGCCGCCCAATCTACTAC	60.096	20	TGCAAACACAAATCAAGCAA	58.882	20	263	1169	1431	TTTGCCGCCCAATCTACTAC	60.096	20	TTGCAAACACAAATCAAGCA	58.882	20	264	1169	1432	TTTGCCGCCCAATCTACTAC	60.096	20	TGCAAACACAAATCAAGCAAA	60.28	21	263	1169	1431
F01_transcript_19526	1	p4	(CCTC)7	28	313	340	TGGCTTTGGGTTGATTTAGG	59.931	20	AAGATGGTCCACGGTACAGC	59.997	20	252	189	440	TGGCTTTGGGTTGATTTAGG	59.931	20	TCAAGATGGTCCACGGTACA	59.96	20	254	189	442	TGGCTTTGGGTTGATTTAGG	59.931	20	ACGGAGGAAGAGGAATGGAT	59.896	20	187	189	375
F01_transcript_19532	1	p2	(AT)6	12	52	63	GCTTTTGTTTATTGCCCTGG	59.586	20	TGTGAGGCTAAGCTGAATGC	59.178	20	105	14	118	GCTTTTGTTTATTGCCCTGG	59.586	20	GTGTGAGGCTAAGCTGAATGC	60.037	21	106	14	119	GTTTATTGCCCTGGTTTTGC	59.456	20	GTGTGAGGCTAAGCTGAATGC	60.037	21	100	20	119
F01_transcript_19533	1	p3	(ATC)5	15	954	968	TTGCGGTGGTTGTGTAAAAA	60.007	20	TAGAAACCCCACTCCTGCTG	60.246	20	247	824	1070	ATGTGGGAGCTCCATTTCTG	60.073	20	TAGAAACCCCACTCCTGCTG	60.246	20	202	869	1070	GGAGCTCCATTTCTGGACAA	60.195	20	TAGAAACCCCACTCCTGCTG	60.246	20	197	874	1070
F01_transcript_19533	2	p1	(T)10	10	1186	1195	CAGCAGGAGTGGGGTTTCTA	60.246	20	ATGGTTTCATGTCCCCAAAA	60.029	20	254	1051	1304	CAGCAGGAGTGGGGTTTCTA	60.246	20	TGGTTTCATGTCCCCAAAAT	60.029	20	253	1051	1303	CAGCAGGAGTGGGGTTTCTA	60.246	20	TTTCTTCTTTGTCACCCGCT	59.853	20	199	1051	1249
F01_transcript_19540	1	p2	(AG)10	20	1	20	--
F01_transcript_19557	1	p3	(GCT)6	18	873	890	GGCCGATGTGCTTACAAAAT	59.967	20	GGCTTCTGCTATTGCAGCTT	59.758	20	130	802	931	GGCCGATGTGCTTACAAAAT	59.967	20	ATTGCCCATTCAGAACCATC	59.756	20	271	802	1072	GGCCGATGTGCTTACAAAAT	59.967	20	GATTGCCCATTCAGAACCAT	59.756	20	272	802	1073
F01_transcript_19577	1	p2	(CT)7	14	1219	1232	AGTCTGCTGTTGATGCATGG	59.862	20	ACATTTGAGAAGGTGAGGCG	60.255	20	143	1129	1271	CACGATGCACACCTTACTGG	60.175	20	ACATTTGAGAAGGTGAGGCG	60.255	20	203	1069	1271	CCACGATGCACACCTTACTG	60.175	20	ACATTTGAGAAGGTGAGGCG	60.255	20	204	1068	1271
F01_transcript_19581	1	p2	(AG)7	14	42	55	GAGCAAACACCAGCAACTCA	60.032	20	ATGAGGGACTTTTGGAAGCA	59.67	20	254	3	256	GAGCAAACACCAGCAACTCA	60.032	20	GAAGCAATGTGGTGGAATGA	59.502	20	240	3	242	GAGCAAACACCAGCAACTCA	60.032	20	GGTTTTTCATGAGGAGCACG	60.636	20	191	3	193
F01_transcript_19584	1	p2	(CT)7	14	163	176	GGCTCCCCGAATAAGATGAT	60.252	20	TGGAGGGCCTAATCACTCAG	60.21	20	278	74	351	CTTTTCTTGGCAGTTGGCTC	59.993	20	TCACGAAGTGCCTGTGATTT	59.293	20	204	59	262	CTTTTCTTGGCAGTTGGCTC	59.993	20	TTCACGAAGTGCCTGTGATT	59.293	20	205	59	263
F01_transcript_19585	1	p1	(A)11	11	9	19	--
F01_transcript_19585	2	p3	(ATA)5	15	1062	1076	TCACAACTCCACTCCACCCT	60.563	20	ACACACGATGGATGAGACGA	60.121	20	156	1013	1168	CTCACAACTCCACTCCACCC	60.563	20	ACACACGATGGATGAGACGA	60.121	20	157	1012	1168	CACAACTCCACTCCACCCTC	60.563	20	AGATGGGATCGTATAGGCCC	60.138	20	182	1014	1195
F01_transcript_19593	1	p2	(GA)6	12	19	30	--
F01_transcript_19602	1	p1	(T)10	10	1141	1150	CTACGCGAAAAGGGAACTTG	59.876	20	TGTTGTGACGAAATCCCAAA	59.941	20	220	1017	1236	CTACGCGAAAAGGGAACTTG	59.876	20	AATCCCAAACTCATCAACGC	59.939	20	209	1017	1225	CCTCAGAGCAGAAAACTGGC	60.134	20	TGTTGTGACGAAATCCCAAA	59.941	20	163	1074	1236
F01_transcript_19609	1	c	(T)12atataaaaagatcaaagtttttttaa(T)12	50	196	245	AAACCCTGAACCCAAAAAGG	60.193	20	CTTCACCCAAAAACATCGGT	59.83	20	265	173	437	AAACCCTGAACCCAAAAAGG	60.193	20	GAGAGAGATTGGGGCTTGAA	59.361	20	131	173	303	CCCCCTCTGCATCTGAGTTA	60.21	20	GAGAGAGATTGGGGCTTGAA	59.361	20	229	75	303
F01_transcript_19609	2	p3	(TTC)5	15	365	379	AAACCCTGAACCCAAAAAGG	60.193	20	CTTCACCCAAAAACATCGGT	59.83	20	265	173	437	AAACCCTGAACCCAAAAAGG	60.193	20	GAGAGAGATTGGGGCTTGAA	59.361	20	131	173	303	CCCCCTCTGCATCTGAGTTA	60.21	20	GAGAGAGATTGGGGCTTGAA	59.361	20	229	75	303
F01_transcript_19622	1	p1	(T)10	10	1315	1324	TGCTCTACCTGGAGCGAAGT	60.156	20	TCAACATGGAAAATCTCTCAGTG	59.228	23	205	1173	1377	TGCTCTACCTGGAGCGAAGT	60.156	20	AACATGGAAAATCTCTCAGTGG	58.174	22	203	1173	1375	TGCTCTACCTGGAGCGAAGT	60.156	20	CAACATGGAAAATCTCTCAGTGG	60.889	23	204	1173	1376
F01_transcript_19632	1	p2	(GA)8	16	79	94	CACCAAGCATTCGTTAGGGT	59.993	20	ACCACCGGATCAATAACCAA	60.051	20	127	44	170	CACCAAGCATTCGTTAGGGT	59.993	20	CCGGATCAATAACCAAATCG	60.146	20	123	44	166	CACCAAGCATTCGTTAGGGT	59.993	20	CGCCCCATTATCATCAAAAC	60.153	20	269	44	312
F01_transcript_19637	1	p2	(AG)6	12	69	80	TGACATAATCCAAACTCAAAAATTG	59.343	25	TTTGGCGAAGAAAAATGGAG	60.181	20	199	11	209	TGACATAATCCAAACTCAAAAATTG	59.343	25	GGGTTTTGGCGAAGAAAAAT	60.292	20	203	11	213	TGACATAATCCAAACTCAAAAATTG	59.343	25	TAGGGTTTTGGCGAAGAAAA	59.693	20	205	11	215
F01_transcript_19648	1	p6	(AGAGAA)6	36	59	94	ATCCTGGAAAGGAAAGGGAG	59.508	20	GAGACGGCAGAGTCAAGGTC	59.993	20	240	22	261	CCTGGAAAGGAAAGGGAGAA	60.54	20	GAGACGGCAGAGTCAAGGTC	59.993	20	238	24	261	ATCCTGGAAAGGAAAGGGAG	59.508	20	TTAGGGCTTCTGCTGTTGGT	59.875	20	128	22	149
F01_transcript_19654	1	p3	(GGA)5	15	478	492	GCAGAGACGACCGCTACTTT	59.644	20	CTGTACCGGGACAACTCCAT	59.844	20	263	443	705	CCCGTCATTCCGTTTTATGA	60.692	20	GTTAGGGTTCGGGAGTAGCC	59.962	20	141	388	528	CCCGTCATTCCGTTTTATGA	60.692	20	GGTTAGGGTTCGGGAGTAGC	59.962	20	142	388	529
F01_transcript_19659	1	p2	(TA)8	16	1216	1231	CTGATGCGGGTCATTTGTTA	59.542	20	TGCGGACCACCTTTAGAAAC	60.11	20	235	1063	1297	CTGATGCGGGTCATTTGTTA	59.542	20	ACCGTCACTAAAACCATCGG	59.853	20	217	1063	1279	GAAAAACTTCCATGGGTTCG	59.406	20	TGCGGACCACCTTTAGAAAC	60.11	20	269	1029	1297
F01_transcript_19662	1	p1	(T)10	10	1258	1267	GTGGCTGACAGCTTGCAGTA	60.207	20	AAAGAATCATTCCATTGCCG	59.901	20	183	1212	1394	GTGGCTGACAGCTTGCAGTA	60.207	20	GAATCATTCCATTGCCGACT	59.9	20	180	1212	1391	GTGGCTGACAGCTTGCAGTA	60.207	20	AGAATCATTCCATTGCCGAC	59.9	20	181	1212	1392
F01_transcript_19666	1	p2	(TA)6	12	1392	1403	CTGATGCCGGTGGTCTAATA	58.599	20	CCAACGACAATCAAACACAAA	59.473	21	107	1323	1429	TAGCTGATGCCGGTGGTCTA	61.73	20	CCAACGACAATCAAACACAAA	59.473	21	110	1320	1429	CTGATGCCGGTGGTCTAATA	58.599	20	CCAACGACAATCAAACACAA	57.998	20	107	1323	1429
F01_transcript_19676	1	c*	(C)11t(C)13(CT)6*	36	1298	1333	TCCTTTGCTCCAAGGAGTGT	59.844	20	CCCTTAGAAAACCCAGGACC	59.799	20	193	1174	1366	GTCCTTTGCTCCAAGGAGTG	59.844	20	CCCTTAGAAAACCCAGGACC	59.799	20	194	1173	1366	TCCTTTGCTCCAAGGAGTGT	59.844	20	GAAAACCCAGGACCAGGACT	60.349	20	187	1174	1360
F01_transcript_19681	1	p2	(AG)15	30	56	85	CAAGAGCAGCGAGTGAACAG	59.922	20	TCAAAACAATGGGGTGGAAT	60.029	20	258	3	260	CAAGAGCAGCGAGTGAACAG	59.922	20	CATCTTTCAAAGTCCGGGAA	60.044	20	124	3	126	CAAGAGCAGCGAGTGAACAG	59.922	20	GGCTTCAGCTGCAGTCTTCT	59.898	20	181	3	183
F01_transcript_19682	1	p3	(ATA)7	21	630	650	TCACCACCTACCAACCATCA	59.806	20	TTTTGCATGGGACTCACAAA	60.088	20	274	536	809	TCACCACCTACCAACCATCA	59.806	20	TGACATGGAGGAGGGATCAT	60.288	20	194	536	729	ATCACCACCCCCATACTCCT	60.456	20	TTTTGCATGGGACTCACAAA	60.088	20	222	588	809
F01_transcript_19682	2	p3	(ATG)6	18	987	1004	TTTGTGAGTCCCATGCAAAA	60.088	20	ACCATTCAACAACCACCCAT	59.95	20	252	790	1041	TTTGTGAGTCCCATGCAAAA	60.088	20	TACCATTCAACAACCACCCA	59.667	20	253	790	1042	GATTTGTGAGTCCCATGCAA	59.502	20	ACCATTCAACAACCACCCAT	59.95	20	254	788	1041
F01_transcript_19686	1	p3	(CGT)6	18	259	276	GTAGGCGGTGGTTGTAGGAA	59.993	20	CGGTAACCAATGGAGCAGAT	59.955	20	118	215	332	GTAGGCGGTGGTTGTAGGAA	59.993	20	TACACCGGAGCCGAAGTATC	60.096	20	245	215	459	TAGGCGGTGGTTGTAGGAAG	60.125	20	CGGTAACCAATGGAGCAGAT	59.955	20	117	216	332
F01_transcript_19688	1	p2	(AT)27	54	1224	1277	TGTTGCAATATTTGGCTGGA	60.073	20	TTTGATATGCCACAAGCAGC	59.839	20	221	1081	1301	TGTTGCAATATTTGGCTGGA	60.073	20	GGAGCATTATCCGCACTAGC	59.835	20	272	1081	1352	CCAACTCTGGCAAGGACTTC	59.844	20	TTTGATATGCCACAAGCAGC	59.839	20	192	1110	1301
F01_transcript_19698	1	p2	(TG)8	16	8	23	--
F01_transcript_19703	1	p2	(TC)7	14	1323	1336	ACTCACTCCTTTTGCTCGGA	59.989	20	TGCACACACCATTATTAGGCA	60.006	21	271	1092	1362	TCACTCCTTTTGCTCGGAGT	59.989	20	TGCACACACCATTATTAGGCA	60.006	21	269	1094	1362	AACTCACTCCTTTTGCTCGG	59.473	20	TGCACACACCATTATTAGGCA	60.006	21	272	1091	1362
F01_transcript_19710	1	p1	(T)12	12	1225	1236	AGGGTTGCTGTTAATGTGCC	60	20	ATTTCTTCCTATCCCGGTGG	60.145	20	255	1121	1375	AGGGTTGCTGTTAATGTGCC	60	20	CCATTTCTTCCTATCCCGGT	60.145	20	257	1121	1377	TTAATGTGCCCCATTTGGTT	60.053	20	CCATTTCTTCCTATCCCGGT	60.145	20	247	1131	1377
F01_transcript_19710	2	p1	(T)11	11	1440	1450	--
F01_transcript_19720	1	p3	(GCT)8	24	512	535	TGCCTGTTGATGCAAGTGAT	60.272	20	CACCTTGTACTGGAGCAGCA	60.049	20	228	458	685	GTTGCCTGTTGATGCAAGTG	60.31	20	CACCTTGTACTGGAGCAGCA	60.049	20	230	456	685	TGCCTGTTGATGCAAGTGAT	60.272	20	GGAGCAGCAGGAGCAGATAC	60.127	20	217	458	674
F01_transcript_19733	1	p1	(A)11	11	624	634	GACCGGGATGTATCCAATTTT	59.902	21	AATTTTACGGTCCCTACCCG	60.068	20	235	430	664	GACCGGGATGTATCCAATTTT	59.902	21	GCTATCAAAACGATGTCGCA	59.839	20	275	430	704	CCGGGATGTATCCAATTTTT	58.622	20	AATTTTACGGTCCCTACCCG	60.068	20	233	432	664
F01_transcript_19738	1	p3	(CAA)5	15	208	222	CGACGTGTTCCTCCCATAGT	59.989	20	CCCCAACTTCCTCATCTTCA	60.042	20	133	166	298	CGACGTGTTCCTCCCATAGT	59.989	20	TCTCGATCTTTGCGCTTTTT	60.096	20	239	166	404	CGACGTGTTCCTCCCATAGT	59.989	20	ATTGATCTGGAATCAACGCC	59.9	20	113	166	278
F01_transcript_19739	1	p2	(TC)17	34	94	127	GTACGCACTCGCACAAACAT	59.794	20	GGATGGAAATGGAGCTGTGT	59.934	20	182	23	204	GTACGCACTCGCACAAACAT	59.794	20	GCCTTCCTTTCACCACCATA	59.933	20	222	23	244	AAAATTTCGTACGCACTCGC	60.272	20	CGAAGAAGTTTTCCGAGACG	59.986	20	262	15	276
F01_transcript_19745	1	c	(TA)8(AT)16	48	1070	1117	CTGCACAACTCTCCGGTACA	59.897	20	AATTAACACTCCAAAGCGACG	59.28	21	239	970	1208	CTGCACAACTCTCCGGTACA	59.897	20	CACTCCAAAGCGACGTATTTT	59.28	21	233	970	1202	TGACGATGAGATTGCCAAAG	59.799	20	AATTAACACTCCAAAGCGACG	59.28	21	274	935	1208
F01_transcript_19757	1	p3	(TGC)5	15	146	160	ACAAGAAGTTGGGCAGCAAT	59.74	20	TATCGGGTGATAGGGGATGA	60.111	20	136	53	188	ACAAGAAGTTGGGCAGCAAT	59.74	20	TGAATATCGGGTGATAGGGG	59.599	20	140	53	192	ACAAGAAGTTGGGCAGCAAT	59.74	20	GGTTCTCCCTGAGCCAATTT	60.443	20	223	53	275
F01_transcript_19757	2	p2	(AT)10	20	1277	1296	TGCTTGCCGTATTTATGCAG	59.864	20	TCTCATGCACCATAGCCTTG	59.823	20	114	1247	1360	TGCTTGCCGTATTTATGCAG	59.864	20	CCATAGCCTTGGTCTCCTCA	60.21	20	105	1247	1351	TGCTTGCCGTATTTATGCAG	59.864	20	ATGCACCATAGCCTTGGTCT	59.579	20	110	1247	1356
F01_transcript_19761	1	p2	(TA)14	28	77	104	--
F01_transcript_19770	1	p2	(AT)10	20	62	81	CTTCGCTTGCTTGCTTACCT	59.791	20	ATGCCCATACAACCAAGTCC	59.676	20	226	3	228	CTTCGCTTGCTTGCTTACCT	59.791	20	TGCCCATACAACCAAGTCCT	60.375	20	225	3	227	ACTTCGCTTGCTTGCTTACC	59.66	20	ATGCCCATACAACCAAGTCC	59.676	20	227	2	228
F01_transcript_19773	1	p3	(TGC)11	33	1046	1078	ATGTGGCTATTTTTGGGCAG	59.96	20	TCAGCAGCAACCAACTCAAC	60.032	20	267	887	1153	ATGTGGCTATTTTTGGGCAG	59.96	20	GTCAGCAGCAACCAACTCAA	60.032	20	268	887	1154	TGGCTATTTTTGGGCAGAAC	60.074	20	TCAGCAGCAACCAACTCAAC	60.032	20	264	890	1153
F01_transcript_19775	1	p1	(T)10	10	1200	1209	AATTAATGCCCCGATGTTGA	60.153	20	CGTAACCGGATCCATGATTT	59.645	20	257	1172	1428	CAGAAATTAATGCCCCGATG	60.281	20	CGTAACCGGATCCATGATTT	59.645	20	261	1168	1428	AAATTAATGCCCCGATGTTG	59.66	20	CGTAACCGGATCCATGATTT	59.645	20	258	1171	1428
F01_transcript_19775	2	p1	(T)11	11	1318	1328	AATTAATGCCCCGATGTTGA	60.153	20	CGTAACCGGATCCATGATTT	59.645	20	257	1172	1428	CAGAAATTAATGCCCCGATG	60.281	20	CGTAACCGGATCCATGATTT	59.645	20	261	1168	1428	AAATTAATGCCCCGATGTTG	59.66	20	CGTAACCGGATCCATGATTT	59.645	20	258	1171	1428
F01_transcript_19777	1	p2	(CT)7	14	21	34	--
F01_transcript_19777	2	p2	(AT)8	16	140	155	CCATTTCCTTCTACAGCACTCA	59.378	22	TCCCCTTTTCTGTAGCTCAA	57.549	20	263	72	334	CCATTTCCTTCTACAGCACTCA	59.378	22	AATCCCCTTTTCTGTAGCTCAA	59.264	22	265	72	336	CCATTTCCTTCTACAGCACTCA	59.378	22	TTGGTTAAATCCCCTTTTCTG	58.101	21	272	72	343
F01_transcript_19782	1	p2	(CT)6	12	32	43	--
F01_transcript_19802	1	p1	(A)11	11	642	652	AGCCCATGATTGAAGATTGG	59.894	20	GCATTTGCCAACACCTTTTT	59.982	20	231	567	797	AGCCCATGATTGAAGATTGG	59.894	20	GCAGGTAGCAACAAAGCTCC	60.022	20	133	567	699	AGCCCATGATTGAAGATTGG	59.894	20	TCTTCAGCAGCAGGTAGCAA	59.888	20	142	567	708
F01_transcript_19815	1	p2	(AT)8	16	139	154	TTTCTCCGTCTTTCATTGGG	60.044	20	CAAATCCATCGTCCGTCTTT	59.933	20	177	19	195	AATTTCCTCAGAGCAGCCAA	59.955	20	CAAATCCATCGTCCGTCTTT	59.933	20	135	61	195	TTTCTCCGTCTTTCATTGGG	60.044	20	CTGCCCTTCTTTCACCTTTG	59.846	20	210	19	228
F01_transcript_19819	1	p2	(TA)20	40	155	194	CAACCAGCGCAAACAAAATA	59.742	20	ACAGGAATCATCCAAATCCG	59.75	20	267	2	268	CAACCAGCGCAAACAAAATA	59.742	20	AATCATCCAAATCCGAGGTG	59.75	20	262	2	263	CCCTCTTTCTCTCTCCCTGG	60.319	20	ACAGGAATCATCCAAATCCG	59.75	20	217	52	268
F01_transcript_19819	2	c	(A)10tgaaaattcttgaattatgtacgtgggttcctgccagacggtttgcctttcacaacattatttaataagc(T)26	106	1236	1341	CGGGGCATGTATACCAAATC	60.038	20	GCCTGCTCCAAAAGCATACA	61.304	20	279	1120	1398	CGGGGCATGTATACCAAATC	60.038	20	TGCCTGCTCCAAAAGCATAC	61.304	20	280	1120	1399	CGGGGCATGTATACCAAATC	60.038	20	TGCCTGCTCCAAAAGCATA	60.495	19	280	1120	1399
F01_transcript_19827	1	p3	(AAG)6	18	120	137	CCTTCCTTCCGTGTACTCCA	60.103	20	TTACAAGCTTGGCAACACCA	60.293	20	203	65	267	CCTTCCTTCCGTGTACTCCA	60.103	20	TACAAGCTTGGCAACACCAA	60.293	20	202	65	266	CCTTCCTTCCGTGTACTCCA	60.103	20	GGCAGAAAGTTCACCAGACC	59.703	20	232	65	296
F01_transcript_19828	1	p2	(GA)7	14	40	53	TAGCCATTGAAGGAGGAAGG	59.264	20	ATGACGAGAAGGTTCTTGCG	60.397	20	103	10	112	TAGCCATTGAAGGAGGAAGG	59.264	20	GACGAGAAGGTTCTTGCGAA	60.517	20	101	10	110	TAGCCATTGAAGGAGGAAGG	59.264	20	TCGTCGACAATTGGTATTGG	59.395	20	234	10	243
F01_transcript_19847	1	p3	(GGT)6	18	297	314	GTCCTTCTTTGGTGGTGGAA	59.943	20	CCCGTACCATTGCACTTCTT	59.993	20	190	265	454	GTCCTTCTTTGGTGGTGGAA	59.943	20	GGCAACCAGGACACTTCATT	59.973	20	228	265	492	TTCCAGTCCTTCTTTGGTGG	60.081	20	CCCGTACCATTGCACTTCTT	59.993	20	195	260	454
F01_transcript_19848	1	p2	(GA)6	12	91	102	TCTAAGAAGGGAGAGGGGGA	60.139	20	ACATCGTGAGGACCAAGAGG	60.112	20	149	68	216	TCTAAGAAGGGAGAGGGGGA	60.139	20	ATGCCAACAGCTTTCATCCT	59.7	20	176	68	243	TCTAAGAAGGGAGAGGGGGA	60.139	20	TCAACGAAACCAGCACATTC	59.697	20	275	68	342
F01_transcript_19854	1	p2	(CT)9	18	123	140	GAAGCGTGGACTGGACTCTC	59.993	20	AACCGAAGAAGGTGATGACG	60.111	20	180	30	209	GAAGCGTGGACTGGACTCTC	59.993	20	AAGCAAACCGAAGAAGGTGA	59.853	20	185	30	214	GAAGCGTGGACTGGACTCTC	59.993	20	GAAAGTTTAGGGGGTTTGGC	59.814	20	140	30	169
F01_transcript_19866	1	p1	(T)12	12	1365	1376	TGCCAACATTATGAAAGCGA	60.215	20	CAAGTTTCAACATACACTATCTCAATC	57.558	27	247	1161	1407	TGCCAACATTATGAAAGCGA	60.215	20	AAGTTTCAACATACACTATCTCAATCA	57.558	27	246	1161	1406	ATCCCAGGACTTCCTCCATT	59.755	20	AAGTTTCAACATACACTATCTCAATCA	57.558	27	102	1305	1406
F01_transcript_19876	1	p2	(TC)6	12	37	48	CATCCACCCTCAAGTTTCCT	58.989	20	GCTTTTGCTTTTTCTTGCGT	59.652	20	222	8	229	CCACCCTCAAGTTTCCTTACC	59.85	21	GCTTTTGCTTTTTCTTGCGT	59.652	20	219	11	229	ACATCCACCCTCAAGTTTCCT	59.848	21	GCTTTTGCTTTTTCTTGCGT	59.652	20	223	7	229
F01_transcript_19878	1	p1	(A)11	11	112	122	TCATCAACATACCCAACTTTTTG	58.909	23	ACAGGATCTGAAACTGCGCT	60.02	20	265	52	316	TCATCAACATACCCAACTTTTTGT	59.687	24	ACAGGATCTGAAACTGCGCT	60.02	20	265	52	316	TCATCAACATACCCAACTTTTTG	58.909	23	CCCTAACCAAAGCAAAGGTG	59.604	20	243	52	294
F01_transcript_19878	2	p2	(AT)17	34	1378	1411	--
F01_transcript_19886	1	p2	(TA)7	14	1115	1128	TATAGCCCGATTCGTCGTTC	60.06	20	ACCACCGACCACATCTCAAT	60.246	20	272	1046	1317	TGAGCTTAAGATCCGAACCG	60.344	20	ACCACCGACCACATCTCAAT	60.246	20	224	1094	1317	TGAGCTTAAGATCCGAACCG	60.344	20	TATATGGAACCCAACCACCG	60.439	20	237	1094	1330
F01_transcript_19886	2	p1	(G)14	14	1233	1246	TATAGCCCGATTCGTCGTTC	60.06	20	ACCACCGACCACATCTCAAT	60.246	20	272	1046	1317	TGAGCTTAAGATCCGAACCG	60.344	20	ACCACCGACCACATCTCAAT	60.246	20	224	1094	1317	TGAGCTTAAGATCCGAACCG	60.344	20	TATATGGAACCCAACCACCG	60.439	20	237	1094	1330
F01_transcript_19899	1	p3	(CTC)9	27	24	50	--
F01_transcript_19899	2	p2	(CT)6	12	704	715	CCAACAACCCTAAGCCGATA	59.953	20	TACCGGAGGAATTCAAGCAC	60.074	20	134	619	752	CCAACAACCCTAAGCCGATA	59.953	20	GTACCGGAGGAATTCAAGCA	60.074	20	135	619	753	CAACCCTAAGCCGATACGAA	60.089	20	TACCGGAGGAATTCAAGCAC	60.074	20	130	623	752
F01_transcript_19899	3	p2	(AT)16	32	1165	1196	CTTTGCCACCTCCAACAAGT	60.149	20	TCCATATCCAGAGGGAGAGAGA	60.169	22	220	1067	1286	GCCACCTCCAACAAGTTAGC	59.74	20	TCCATATCCAGAGGGAGAGAGA	60.169	22	216	1071	1286	CTTTGCCACCTCCAACAAGT	60.149	20	CCATATCCAGAGGGAGAGAGAA	59.668	22	219	1067	1285
F01_transcript_19903	1	p2	(TG)7	14	103	116	TGTACATTTGCAGAGGACGG	59.716	20	ATACCCACCTCCCCAATCTC	60.015	20	193	28	220	TGTACATTTGCAGAGGACGG	59.716	20	AGGTTGCTAATCCCTCCGTT	59.962	20	238	28	265	TGTACATTTGCAGAGGACGG	59.716	20	GTTGCTAATCCCTCCGTTCA	60.074	20	236	28	263
F01_transcript_19903	2	p1	(A)10	10	1220	1229	ACAGTCATGTGGGGAAAAGC	59.973	20	TTCTGCGAAAGAAAGAAGGC	59.708	20	209	1110	1318	ATCAATGGAGAGCAACCCAC	59.934	20	TTCTGCGAAAGAAAGAAGGC	59.708	20	144	1175	1318	CAATGGAGAGCAACCCACTT	60.111	20	TTCTGCGAAAGAAAGAAGGC	59.708	20	142	1177	1318
F01_transcript_19904	1	p2	(TC)7	14	53	66	GCACATTTCTCGCTCAACAT	58.879	20	CAACAAGACGACCGATCCTT	60.111	20	136	1	136	GCACATTTCTCGCTCAACATT	60.272	21	CAACAAGACGACCGATCCTT	60.111	20	136	1	136	GCACATTTCTCGCTCAACAT	58.879	20	TCTAGCAACAAGACGACCGA	59.591	20	141	1	141
F01_transcript_19904	2	p2	(AG)6	12	1298	1309	ATGCAAGCCTCTTTTGGTGT	59.74	20	CAAAGACAGCCTCAACATAATCA	59.28	23	244	1120	1363	ATGATGCAAGCCTCTTTTGG	60.214	20	GACAGCCTCAACATAATCATTCA	59.104	23	243	1117	1359	CGATCCAGTGATGATGCAAG	60.225	20	GACAGCCTCAACATAATCATTCA	59.104	23	253	1107	1359
F01_transcript_19907	1	p3	(CAG)5	15	1067	1081	AATGCCTGTACGAAACCGTC	60	20	CTCTAGCGCAGGAAGAGGAA	59.853	20	164	1004	1167	TACGAAACCGTCAAGAGCCT	59.875	20	CTCTAGCGCAGGAAGAGGAA	59.853	20	156	1012	1167	GTGAAGCAATGCCTGTACGA	59.871	20	CTCTAGCGCAGGAAGAGGAA	59.853	20	171	997	1167
F01_transcript_19912	1	p1	(T)10	10	1266	1275	GAAGTCTTGGAGCTGCCATC	59.957	20	TCCACATGATGCTGAGAAGTG	59.846	21	241	1076	1316	GCCATTCCTTTCAAGAGCAG	59.955	20	TCCACATGATGCTGAGAAGTG	59.846	21	119	1198	1316	AGCCATTCCTTTCAAGAGCA	59.955	20	TCCACATGATGCTGAGAAGTG	59.846	21	120	1197	1316
F01_transcript_19920	1	c	(ATCT)5atatttatattcgttgtatatctgtgtcaacatccactttcactcaatatatattccaaaccccagctaatt(TC)6	104	63	166	CAAAGTACCAAACTCGCGCT	60.44	20	TGCCCTTGTTGATCCATTTT	60.309	20	261	8	268	AGTACCAAACTCGCGCTTTC	59.522	20	TGCCCTTGTTGATCCATTTT	60.309	20	258	11	268	CAAAGTACCAAACTCGCGCT	60.44	20	TTTTCGATCTTGCTTCACGA	59.542	20	209	8	216
F01_transcript_19927	1	p3	(GCT)5	15	1059	1073	ACTTCCCTATCATTGGCCCT	59.789	20	GCTGAAACCCAGGTCATCAT	59.934	20	279	851	1129	ACTTCCCTATCATTGGCCCT	59.789	20	TCATCAGCAGGCTCTTCCTT	60.096	20	254	851	1104	ACTTCCCTATCATTGGCCCT	59.789	20	TTCATCAGCAGGCTCTTCCT	60.096	20	255	851	1105
F01_transcript_19930	1	p2	(GA)11	22	81	102	TGTGCACTCATGTCTTCCGT	60.319	20	GGTCCCTCCATCTCTCTTCC	60.012	20	146	25	170	TGTGCACTCATGTCTTCCGT	60.319	20	AAGAATGGTCCCTGCAACAC	59.973	20	236	25	260	TGTGCACTCATGTCTTCCGT	60.319	20	CCCTCCATCTCTCTTCCTCC	60.149	20	143	25	167
F01_transcript_19933	1	p2	(AG)6	12	59	70	GCGAGGAGTGGTGAGAAAAC	59.851	20	ACCTCCACGTATTGCCTTTG	59.993	20	270	34	303	AGAGTTGTGGTGCGAGGAGT	59.907	20	ACATGGCCCCCATACAAATA	59.901	20	193	23	215	AGAGTTGTGGTGCGAGGAGT	59.907	20	AGAACTGCCACCGATTTCAC	60.119	20	164	23	186
F01_transcript_19934	1	p3	(TTA)5	15	1250	1264	TACAAGGTTGGAGGTGGAGC	60.111	20	AGAAGCTAACTTCCCTCCCG	59.842	20	242	1084	1325	CGGATTCCCTTTGTCCAGTA	59.926	20	CCCGTAAGCCATCATTTCAT	59.784	20	274	1036	1309	TACAAGGTTGGAGGTGGAGC	60.111	20	CCCGTAAGCCATCATTTCAT	59.784	20	226	1084	1309
F01_transcript_19948	1	c	(TG)17(AG)20	74	6	79	--
F01_transcript_19961	1	p2	(CT)6	12	32	43	ACAGAGTACGCCTTCAATCTTC	57.633	22	CGAACCCATCAGGGACTCTA	60.065	20	246	7	252	ACAGAGTACGCCTTCAATCTTC	57.633	22	ATCGAGGTTTCGAATTGTGG	59.933	20	149	7	155	ACAGAGTACGCCTTCAATCTTC	57.633	22	GGATCGCCATCTTGAACAAT	59.9	20	214	7	220
F01_transcript_19964	1	p1	(T)10	10	1270	1279	GAAGTCTTGGAGCTGCCATC	59.957	20	CAATGCTGAGAAGTGCAAGTT	58.173	21	235	1080	1314	GCCATTCCTTTCAAGAGCAG	59.955	20	AACAATGCTGAGAAGTGCAAG	58.173	21	115	1202	1316	GCCATTCCTTTCAAGAGCAG	59.955	20	CAATGCTGAGAAGTGCAAGTT	58.173	21	113	1202	1314
F01_transcript_19967	1	p1	(T)10	10	1323	1332	AGCCATTAGGCCTTCCCTTA	60.055	20	ACATTAATTCAGCAACGGGG	59.823	20	209	1206	1414	TAAGCCATTAGGCCTTCCCT	60.055	20	ACATTAATTCAGCAACGGGG	59.823	20	211	1204	1414	GCCATTAGGCCTTCCCTTAG	60.055	20	ACATTAATTCAGCAACGGGG	59.823	20	208	1207	1414
F01_transcript_19984	1	p2	(AT)20	40	1289	1328	GGCGACTGGAAAGGTTATGA	60.074	20	TCAAAAACCAAGAAATTCACGA	59.603	22	272	1082	1353	ATAAAGGCATTGACCACCCA	60.192	20	TCAAAAACCAAGAAATTCACGA	59.603	22	164	1190	1353	TCCGAAGAATCTGACGAACC	60.195	20	TCAAAAACCAAGAAATTCACGA	59.603	22	100	1254	1353
F01_transcript_20019	1	p2	(AT)28	56	1173	1228	TGTTGCAATATTTGGCTGGA	60.073	20	TTTGATATGCCACAAGCAGC	59.839	20	223	1030	1252	TGTTGCAATATTTGGCTGGA	60.073	20	GGAGCATTATCCGCACTAGC	59.835	20	274	1030	1303	TTGGGATGGAAGGTGAACTC	59.903	20	TTTGATATGCCACAAGCAGC	59.839	20	126	1127	1252
F01_transcript_20020	1	c	(CT)7aa(ATCT)5atatttatattcgttgtatatctgtgtcaacatccactttcactcaatatatattccaaaccccagctaatt(TC)6	120	80	199	CAAAGTACCAAACTCGCGCT	60.44	20	TGCCCTTGTTGATCCATTTT	60.309	20	257	45	301	AGTACCAAACTCGCGCTTTC	59.522	20	TGCCCTTGTTGATCCATTTT	60.309	20	254	48	301	CAAAGTACCAAACTCGCGCT	60.44	20	TTTTCGATCTTGCTTCACGA	59.542	20	205	45	249
F01_transcript_20024	1	p3	(ATT)13	39	1186	1224	TCTCCTCCAGGCTCCAGTAA	59.943	20	CATGCAGGAGAAAGATGCAA	59.948	20	178	1113	1290	CATCCTACCAAAGGAGCCAA	60.066	20	CATGCAGGAGAAAGATGCAA	59.948	20	272	1019	1290	GGAGGTAAGGGTGCAGATGA	60.073	20	CATGCAGGAGAAAGATGCAA	59.948	20	232	1059	1290
F01_transcript_20038	1	p2	(AG)6	12	124	135	GCGAGGAGTGGTGAGAAAAC	59.851	20	ACCTCCACGTATTGCCTTTG	59.993	20	273	99	371	AGAGTTGTGGTGCGAGGAGT	59.907	20	ACATGGCCCCCATACAAATA	59.901	20	196	88	283	AGAGTTGTGGTGCGAGGAGT	59.907	20	ATTCACGGAGGACGACTTTG	60.111	20	152	88	239
F01_transcript_20041	1	p2	(TA)6	12	157	168	CCTCAGAACTGCCCTGAGAA	60.523	20	ACACTGGTGGTGGGATGAAT	60.096	20	223	98	320	AAAACCTCAGAACTGCCCTG	59.328	20	ACACTGGTGGTGGGATGAAT	60.096	20	227	94	320	CCTCAGAACTGCCCTGAGAA	60.523	20	ACAGGAATCATCCAAATCCG	59.75	20	149	98	246
F01_transcript_20070	1	p2	(TA)10	20	206	225	CCTCAGTTCGTCGGCTAATC	59.836	20	TTTCCCAAACCCCTAAAACC	60.027	20	221	86	306	TCCTCAGTTCGTCGGCTAAT	59.836	20	TTTCCCAAACCCCTAAAACC	60.027	20	222	85	306	TTCCGATTTTCTCCTCCTCA	59.744	20	TTTCCCAAACCCCTAAAACC	60.027	20	236	71	306
F01_transcript_20070	2	p1	(A)10	10	1233	1242	AGCAAAAGCGGTAGCTGTGT	60.081	20	TGTAGCAATTTAACCAACCGT	57.269	21	135	1161	1295	AAGAACAGGACGACCTCGAA	59.844	20	TGTAGCAATTTAACCAACCGT	57.269	21	203	1093	1295	ATCTTGTGATCTTCGTCGCC	60.226	20	TGTAGCAATTTAACCAACCGT	57.269	21	245	1051	1295
F01_transcript_20073	1	p2	(AT)17	34	44	77	CCATCCGATCAATATCATTTCA	59.621	22	ATCTGTGGTCTCAACCTCGG	60.112	20	229	6	234	CCATCCGATCAATATCATTTCA	59.621	22	TGGTCTCAACCTCGGAACTC	60.238	20	224	6	229	CCATCCGATCAATATCATTTCA	59.621	22	CGGAACTCTTGTCAAATGGG	60.486	20	212	6	217
F01_transcript_20073	2	p3	(CTG)8	24	288	311	CCGAGGTTGAGACCACAGAT	60.112	20	CTTCCACCTTTGACTCCTCG	59.837	20	189	215	403	CCGAGGTTGAGACCACAGAT	60.112	20	TTTGACTCCTCGAACTTGGG	60.224	20	181	215	395	GAGTTCCGAGGTTGAGACCA	60.238	20	CTTCCACCTTTGACTCCTCG	59.837	20	194	210	403
F01_transcript_20073	3	p3	(AGA)6	18	775	792	TGCAGTCGAGTGATGAGGAA	60.557	20	TTCTCTACCGGCACAGAGGT	59.867	20	118	735	852	TGCAGTCGAGTGATGAGGAA	60.557	20	CGCCTGGAAGTTTTTCTTTG	59.855	20	192	735	926	ATGCAGTCGAGTGATGAGGA	59.372	20	TTCTCTACCGGCACAGAGGT	59.867	20	119	734	852
F01_transcript_20073	4	p6	(TATGAT)5	30	1201	1230	TTCCTGGGTACCACTCCAAG	59.959	20	CACCCAAACACTTGCATAATTT	58.922	22	207	1071	1277	GATTCCTGGGTACCACTCCA	59.779	20	CACCCAAACACTTGCATAATTT	58.922	22	209	1069	1277	TTCCTGGGTACCACTCCAAG	59.959	20	ACACCCAAACACTTGCATAATTT	59.7	23	208	1071	1278
F01_transcript_20076	1	p1	(T)10	10	499	508	CTCGTCGATGACAGCACAAT	59.862	20	GTCCGGAACAACCTTACGAA	59.971	20	274	322	595	ATGACAGCACAATCGACGAC	59.714	20	GTCCGGAACAACCTTACGAA	59.971	20	267	329	595	TTTGCAAGAGATTTGCTCCC	60.331	20	GTCCGGAACAACCTTACGAA	59.971	20	193	403	595
F01_transcript_20076	2	p1	(T)11	11	1386	1396	--
F01_transcript_20080	1	p2	(CT)13	26	9	34	--
F01_transcript_20081	1	p4	(ATAG)6	24	1160	1183	ATTCATCCTCCTGCAACCAA	60.461	20	AATGCCCGTGCCAATAATAA	60.172	20	266	1024	1289	AATTCATCCTCCTGCAACCA	60.461	20	AATGCCCGTGCCAATAATAA	60.172	20	267	1023	1289	TCAAGAGGTGCGTCAAGATG	59.984	20	TCATCACATGGTCGATCTGC	60.663	20	269	947	1215
F01_transcript_20081	2	p4	(CTTT)5	20	1309	1328	TTATTATTGGCACGGGCATT	60.172	20	GTGAAGCAAGCAAACAAGC	57.195	19	129	1270	1398	GCAGATCGACCATGTGATGA	60.663	20	GTGAAGCAAGCAAACAAGC	57.195	19	203	1196	1398	ATTATTATTGGCACGGGCAT	59.174	20	GTGAAGCAAGCAAACAAGC	57.195	19	130	1269	1398
F01_transcript_20082	1	p4	(TGTT)6	24	1256	1279	TTGAAGTGTGGGGGCATATC	60.723	20	TCCGATCAAGAAACGTTCAA	59.247	20	239	1094	1332	AGTGTGGGGGCATATCCTCT	60.735	20	TCCGATCAAGAAACGTTCAA	59.247	20	235	1098	1332	TTGAAGTGTGGGGGCATATC	60.723	20	GGCCAATTGAGAAACGTTCA	61.012	20	268	1094	1361
F01_transcript_20084	1	p6	(CTGTAT)5	30	181	210	GCGAGTCTGTGTTGACGTTG	60.51	20	CCCCAATAACTCATCGGAAA	59.756	20	231	22	252	TGCGAGTCTGTGTTGACGTT	60.51	20	CCCCAATAACTCATCGGAAA	59.756	20	232	21	252	GCGAGTCTGTGTTGACGTTG	60.51	20	GTCCCCAATAACTCATCGGA	59.75	20	233	22	254
F01_transcript_20094	1	p1	(T)21	21	1298	1318	TTTGTGGTGGTTTTCTGCAC	59.591	20	GCATTTCTCATTTCTCATTTCCA	60.434	23	103	1265	1367	CGAGCAGCTGATGAAGAAGA	59.42	20	GCATTTCTCATTTCTCATTTCCA	60.434	23	219	1149	1367	GACGAGCAGCTGATGAAGAA	59.271	20	GCATTTCTCATTTCTCATTTCCA	60.434	23	221	1147	1367
F01_transcript_20097	1	p2	(AG)8	16	11	26	--
F01_transcript_20097	2	p2	(TC)20	40	1154	1193	TTTCCCCCATTCTTCTGTTG	59.903	20	ACAACCAACTCCAAACCAGG	59.861	20	248	1131	1378	TTTCCCCCATTCTTCTGTTG	59.903	20	AACCAACTCCAAACCAGGTG	59.861	20	246	1131	1376	TTTCCCCCATTCTTCTGTTG	59.903	20	ACCAACTCCAAACCAGGTGA	60.399	20	245	1131	1375
F01_transcript_20098	1	p1	(T)10	10	1349	1358	CTTGATTGCTGCTGGTGAAA	59.988	20	ACTACGCCGCATAATTTCCA	60.476	20	248	1169	1416	TGTTAAGCGCTTGATTGCTG	60.155	20	ACTACGCCGCATAATTTCCA	60.476	20	257	1160	1416	TGATTGCTGCTGGTGAAAAA	60.379	20	ACTACGCCGCATAATTTCCA	60.476	20	246	1171	1416
F01_transcript_20103	1	p2	(AT)17	34	1284	1317	CCTTAGGGTTGCCTGTTTCA	60.103	20	TCAAAGACACTGGGATCGAA	59.215	20	196	1154	1349	AGCCTTAGGGTTGCCTGTTT	60.13	20	TCAAAGACACTGGGATCGAA	59.215	20	198	1152	1349	AAAGCCTTAGGGTTGCCTGT	60.13	20	TCAAAGACACTGGGATCGAA	59.215	20	200	1150	1349
F01_transcript_20127	1	p2	(TC)7	14	53	66	GGTGGAGCTCGTGTCTCTCT	59.585	20	CCTTGCTATTCAAAACCCGA	60.067	20	214	7	220	GGTGGAGCTCGTGTCTCTCT	59.585	20	TCCTTGCTATTCAAAACCCG	60.067	20	215	7	221	GGTGGAGCTCGTGTCTCTCT	59.585	20	TCAAAACCCGAGAAGTGGAC	60.088	20	205	7	211
F01_transcript_20128	1	p1	(T)10	10	1169	1178	AAAGCTGAAGATGCAAAGCC	59.597	20	TGGTGGTACAAGTACAGAGAGCA	59.85	23	268	1010	1277	AAAGCTGAAGATGCAAAGCC	59.597	20	AAGGGTGGTGGTACAAGTACAGA	59.84	23	273	1010	1282	GTTGCTGGGAGCTGAGTTGT	60.453	20	TGGTGGTACAAGTACAGAGAGCA	59.85	23	232	1046	1277
F01_transcript_20139	1	p3	(CAG)5	15	116	130	ACAGCAATGTTCCAGCTCCT	59.874	20	ATGTGGTAGCGGAGGTTGAC	59.997	20	179	77	255	ACAGCAATGTTCCAGCTCCT	59.874	20	GACCACTTGCCGTACCAGAT	59.997	20	236	77	312	AAAAAGACGACGACGGAAGA	59.853	20	ATGTGGTAGCGGAGGTTGAC	59.997	20	216	40	255
F01_transcript_20140	1	p1	(A)32	32	1403	1434	--
F01_transcript_20158	1	p1	(T)10	10	1289	1298	--
F01_transcript_20164	1	p1	(A)10	10	232	241	TCACCCACACAGTAGAGGGA	59.097	20	GCCTCTAACCATGGCAGAAT	59.154	20	196	166	361	CACCCACACAGTAGAGGGAA	58.565	20	GCTGCTCTGCCTCTAACCAT	59.603	20	203	167	369	CCCACACAGTAGAGGGAAACA	60.013	21	GCCTCTAACCATGGCAGAAT	59.154	20	193	169	361
F01_transcript_20164	2	c	(AGC)5(CGC)8	39	786	824	ACCGTGGAGTCTTTCAGTGG	60.151	20	CGAACCAATATCACCTCCGT	59.813	20	189	760	948	ACCGTGGAGTCTTTCAGTGG	60.151	20	ACGAACCAATATCACCTCCG	59.813	20	190	760	949	GCACCGTGGAGTCTTTCAGT	60.307	20	ACCACCGATGAAGACGAATC	59.934	20	160	758	917
F01_transcript_20166	1	p3	(GAT)5	15	885	899	CAGGGTTTGACGGTTGTTCT	60.005	20	GCACCAGATAGCTTTCAGTTTTT	59.008	23	216	823	1038	CTTCAGGGTTTGACGGTTGT	60.005	20	GCACCAGATAGCTTTCAGTTTTT	59.008	23	219	820	1038	ACAATTGGCTTCAGGGTTTG	59.971	20	GCACCAGATAGCTTTCAGTTTTT	59.008	23	227	812	1038
F01_transcript_20170	1	p1	(T)10	10	1324	1333	--
F01_transcript_20177	1	p2	(AT)23	46	1215	1260	GCCCATAGTAGTGGAGCAGC	59.866	20	CAGAGGAGAGGACACCACAA	58.803	20	220	1160	1379	GCCCATAGTAGTGGAGCAGC	59.866	20	GGCATCTGAGTTACAACCTGC	59.755	21	184	1160	1343	GCCCATAGTAGTGGAGCAGC	59.866	20	AACAGAGGAGAGGACACCACA	59.741	21	222	1160	1381
F01_transcript_20182	1	p2	(AT)6	12	1159	1170	GTCTGCCATTTCTTTCCAGC	59.82	20	GGTATTCTTTCTGCGCAAGG	59.845	20	220	1014	1233	CCTGTCTGCCATTTCTTTCC	59.67	20	GGTATTCTTTCTGCGCAAGG	59.845	20	223	1011	1233	GCTCCTGTCTGCCATTTCTT	59.434	20	GGTATTCTTTCTGCGCAAGG	59.845	20	226	1008	1233
F01_transcript_20185	1	p3	(GAA)8	24	127	150	CACCCAACCGGATTTATGAC	60.051	20	TGGGATTCTTATCAGGGTGC	59.894	20	238	23	260	CCCAACCGGATTTATGACAC	60.051	20	TGGGATTCTTATCAGGGTGC	59.894	20	236	25	260	ACCCAACCGGATTTATGACA	60.051	20	TGGGATTCTTATCAGGGTGC	59.894	20	237	24	260
F01_transcript_20195	1	p1	(A)11	11	1257	1267	TTGTCTTCTGTGGTGGATGC	59.682	20	TGGAAGCAGAGAGACTCATCAA	60.134	22	255	1039	1293	TTGTCTTCTGTGGTGGATGC	59.682	20	TGGAAGCAGAGAGACTCATCA	58.684	21	255	1039	1293	GGCAGGATTTTGAGGAGAGA	59.361	20	TGGAAGCAGAGAGACTCATCAA	60.134	22	220	1074	1293
F01_transcript_20199	1	p2	(AG)8	16	1255	1270	AGCTTTTGGTGCGTTGAACT	59.92	20	TCTCAGTGCACCCTTTTTCA	59.415	20	167	1127	1293	GCTTTTGGTGCGTTGAACTT	60.292	20	TCTCAGTGCACCCTTTTTCA	59.415	20	166	1128	1293	TCTGTCGCAGAGACTCCAAA	59.701	20	TCTCAGTGCACCCTTTTTCA	59.415	20	261	1033	1293
F01_transcript_20203	1	p3	(ATA)20	60	1161	1220	GGAGATCAGGCAGGCAATTA	60.177	20	GGAACACAAACCATTTCCTTG	59.322	21	273	1109	1381	TCAGGCAGGCAATTAAGGAC	60.214	20	GGAACACAAACCATTTCCTTG	59.322	21	268	1114	1381	GATCAGGCAGGCAATTAAGG	59.668	20	GGAACACAAACCATTTCCTTG	59.322	21	270	1112	1381
F01_transcript_20223	1	p2	(GA)15	30	1	30	--
F01_transcript_20233	1	p1	(A)10	10	810	819	GTTCCAATAGGTTGAGCCGA	60.074	20	TGCACAATCTGTTTTGCCTC	59.847	20	254	643	896	AGGCACGGGAAGTGTCTATG	60.134	20	TTTCTTCTATGCAATGGGGG	59.894	20	260	755	1014	AGGCACGGGAAGTGTCTATG	60.134	20	TGCACAATCTGTTTTGCCTC	59.847	20	142	755	896
F01_transcript_20234	1	p6	(TCTCTT)5	30	36	65	TTCCGGTCTTTCTCTCTTGC	59.55	20	GGTTGCTCTTCAGAACCTCG	59.989	20	234	1	234	TTCCGGTCTTTCTCTCTTGC	59.55	20	CCTCGATCTGTTGCTGTTGA	59.984	20	219	1	219	TTCCGGTCTTTCTCTCTTGC	59.55	20	TGCTCTGTTTGTGGTGGTGT	60.203	20	103	1	103
F01_transcript_20242	1	p3	(CCT)8	24	12	35	--
F01_transcript_20246	1	p1	(T)11	11	708	718	TTTTTGAAGGGAGATGGCAC	60.051	20	CGGTTTGACGTTTGGAAGTT	60.008	20	106	644	749	TGTTTTTGAAGGGAGATGGC	60.051	20	CGGTTTGACGTTTGGAAGTT	60.008	20	108	642	749	GTTTTTGAAGGGAGATGGCA	60.051	20	CGGTTTGACGTTTGGAAGTT	60.008	20	107	643	749
F01_transcript_20248	1	p2	(TA)6	12	1236	1247	GCTGAGGAACTTGAAGCCAG	60.134	20	TCTGGAGTCTGGATAGCCACT	58.906	21	257	1103	1359	GCTGAGGAACTTGAAGCCAG	60.134	20	GTCTGGAGTCTGGATAGCCACT	59.768	22	258	1103	1360	TTGCTGAGGAACTTGAAGCC	60.517	20	TCTGGAGTCTGGATAGCCACT	58.906	21	259	1101	1359
F01_transcript_20254	1	p2	(AT)16	32	1257	1288	ACAAACTCGGTTGTGCATGA	60.16	20	CCTCAGCCAAATGAAGCAAT	60.214	20	203	1124	1326	CTGCTTCCACACTCTTGCAG	59.77	20	CCTCAGCCAAATGAAGCAAT	60.214	20	172	1155	1326	CACTCTTGCAGCCCTCTTCT	59.745	20	CCTCAGCCAAATGAAGCAAT	60.214	20	163	1164	1326
F01_transcript_20265	1	p3	(GAA)5	15	584	598	TTTCACGAAGAAAACCCCAC	59.948	20	CTTTCATCTAGGCTTTGCGG	59.975	20	254	424	677	CTCCGAATCACAGACCCAAT	59.927	20	CTTTCATCTAGGCTTTGCGG	59.975	20	186	492	677	TTTCACGAAGAAAACCCCAC	59.948	20	TTTCATCTAGGCTTTGCGGT	59.845	20	253	424	676
F01_transcript_20269	1	p1	(T)11	11	1343	1353	GTCGGATGTTTTCGCAATTT	59.945	20	TGAGGCAGTAGCAAAGTGGTT	59.928	21	146	1266	1411	ATTCTGGTCGGATGTTTTCG	59.933	20	TGAGGCAGTAGCAAAGTGGTT	59.928	21	152	1260	1411	GTCGGATGTTTTCGCAATTT	59.945	20	TGAGGCAGTAGCAAAGTGGT	58.524	20	146	1266	1411
F01_transcript_20280	1	p2	(CT)12	24	72	95	GTGCCGTAAATACCTCCCCT	60.208	20	CTCCGCTCCCTAACAGTGAC	59.867	20	124	33	156	AAGATTGGTTTCTGTGCCGT	59.598	20	CTCCGCTCCCTAACAGTGAC	59.867	20	137	20	156	GTGCCGTAAATACCTCCCCT	60.208	20	TTCTCCGCTCCCTAACAGTG	60.388	20	126	33	158
F01_transcript_20285	1	p1	(T)10	10	1375	1384	--
F01_transcript_20311	1	c	(CTT)9gctaattaatttctttaaattccctgtcttgtcttgataattatatttattagatatt(ATG)5	100	170	269	CGCCCTTCTTCTTTTCTCCT	59.955	20	GTTTTCATCAAGAAAGGCGG	59.685	20	240	118	357	CGCCCTTCTTCTTTTCTCCT	59.955	20	GGTTTTCATCAAGAAAGGCG	59.685	20	241	118	358	ACCGCCCTTCTTCTTTTCTC	59.827	20	GGTTTTCATCAAGAAAGGCG	59.685	20	243	116	358
F01_transcript_20311	2	p2	(TA)17	34	1030	1063	TAAGGCTTCAGCGAGAGAGG	59.853	20	TGCAAACCTGCTAATCAAAAA	58.482	21	257	915	1171	CAGCGAGAGAGGGAGATCAG	60.238	20	TGCAAACCTGCTAATCAAAAA	58.482	21	249	923	1171	AATGGTGAAAGTGCAAGCCT	59.74	20	TGCAAACCTGCTAATCAAAAA	58.482	21	207	965	1171
F01_transcript_20313	1	p3	(AGA)5	15	706	720	TGAATTGGAGGTGAAGAGGG	60.042	20	TTCAAACATATCCTTCGCCC	59.901	20	178	607	784	TAGTGCTATGGCAAAAGGGG	60.089	20	TTCAAACATATCCTTCGCCC	59.901	20	211	574	784	TTGGAGGTGAAGAGGGTGAG	60.229	20	TTCAAACATATCCTTCGCCC	59.901	20	174	611	784
F01_transcript_20315	1	c	(C)14atcacaaccttcgcctccttcattcggcccacccattctc(CCCT)5	74	57	130	GGGTTCCAAGTAGGGAAAGTT	58.5	21	ACGAGGAAAAGGAAGGTGGT	59.972	20	168	0	167	GGGTTCCAAGTAGGGAAAGTT	58.5	21	CCCAACATAGACCGGAAAGA	59.926	20	262	0	261	GGGTTCCAAGTAGGGAAAGTT	58.5	21	CGCCGGAAAAACTAGAATCA	60.202	20	214	0	213
F01_transcript_20315	2	p1	(T)10	10	693	702	ATTGATGCTCCGATTTGGAC	59.9	20	ACATCCGCAAGACCAGAAAC	60.119	20	167	598	764	GGTCCTTTCCGATTTGGTTT	60.166	20	ACAGAACCGGCGAGAAGTAA	59.875	20	251	661	911	GGTCCTTTCCGATTTGGTTT	60.166	20	AACAGAACCGGCGAGAAGTA	59.875	20	252	661	912
F01_transcript_20317	1	p1	(A)10	10	1353	1362	--
F01_transcript_20333	1	p1	(A)11	11	1330	1340	--
F01_transcript_20340	1	p2	(AT)9	18	1249	1266	ACAAACTCGGTTGTGCATGA	60.16	20	CCTCAGCCAAATGAAGCAAT	60.214	20	189	1116	1304	CTGCTTCCACACTCTTGCAG	59.77	20	CCTCAGCCAAATGAAGCAAT	60.214	20	158	1147	1304	CACTCTTGCAGCCCTCTTCT	59.745	20	CCTCAGCCAAATGAAGCAAT	60.214	20	149	1156	1304
F01_transcript_20344	1	p2	(TA)28	56	1239	1294	TTTTCTCTTCATTTTGATAGCATCC	59.991	25	GACCAATTGAGAAACGTTCAA	57.714	21	207	1154	1360	TTTCTCTTCATTTTGATAGCATCC	58.822	24	GACCAATTGAGAAACGTTCAA	57.714	21	206	1155	1360	TTCTCTTCATTTTGATAGCATCC	57.535	23	GACCAATTGAGAAACGTTCAA	57.714	21	205	1156	1360
F01_transcript_20345	1	p3	(AAG)5	15	114	128	TCGGTGATTGCTGGTTAAGA	59.272	20	TTACAAGCTTGGCAACACCA	60.293	20	251	9	259	TCGGTGATTGCTGGTTAAGA	59.272	20	TACAAGCTTGGCAACACCAA	60.293	20	250	9	258	TCGGTGATTGCTGGTTAAGA	59.272	20	CTTGGCAACACCAAAATTCC	60.344	20	244	9	252
F01_transcript_20349	1	p2	(TA)7	14	58	71	CCCCATTTCTCCTCCTTTTC	59.875	20	TTCCGATGGGTTGGTAAGAC	59.79	20	193	16	208	TCCCCATTTCTCCTCCTTTT	59.875	20	TTCCGATGGGTTGGTAAGAC	59.79	20	194	15	208	CCCCATTTCTCCTCCTTTTC	59.875	20	CGATGGGTTGGTAAGACCAG	60.366	20	190	16	205
F01_transcript_20349	2	p3	(GGA)5	15	258	272	GTCTTACCAACCCATCGGAA	59.79	20	TTACACAGCAGCTCCACGTC	60.056	20	118	189	306	GTCTTACCAACCCATCGGAA	59.79	20	CTAAGAACCAGGAGATGCCG	59.83	20	258	189	446	GTCTTACCAACCCATCGGAA	59.79	20	TCTTACACAGCAGCTCCACG	60.199	20	120	189	308
F01_transcript_20353	1	p3	(GAT)6	18	152	169	GGACCAGAAATCAGAACCCA	59.903	20	GGTCCAACGTCTTTAACCGA	59.971	20	182	108	289	TGGACCAGAAATCAGAACCC	59.903	20	GGTCCAACGTCTTTAACCGA	59.971	20	183	107	289	GGACCAGAAATCAGAACCCA	59.903	20	CTTTAACCGATTGGCCGTTA	59.958	20	172	108	279
F01_transcript_20362	1	p3	(ATT)5	15	1297	1311	AGAGGAACACCAGGAAGTGG	59.149	20	ACACCAACAACAATTGCCAG	59.465	20	274	1067	1340	CCTGGCAGAAGTGAAGTGAA	59.007	20	ACACCAACAACAATTGCCAG	59.465	20	193	1148	1340	GAGGAACACCAGGAAGTGGT	59	20	ACACCAACAACAATTGCCAG	59.465	20	273	1068	1340
F01_transcript_20368	1	p4	(GTCA)5	20	149	168	GTCAAAACATAACCGGTGGC	60.235	20	GCCCCAAAGACTTGTTTCAA	60.088	20	175	124	298	CCCACCAACCCCATTACATA	60.301	20	GCCCCAAAGACTTGTTTCAA	60.088	20	275	24	298	GTCAAAACATAACCGGTGGC	60.235	20	TCTTCACTTTCCCAGTTGCC	60.232	20	262	124	385
F01_transcript_20375	1	p1	(T)10	10	1170	1179	GAAGCAACGACTGCGTATCA	60.019	20	CATTGCAAAATCATTTGCCT	58.627	20	243	1013	1255	TGAAGCAACGACTGCGTATC	60.019	20	CATTGCAAAATCATTTGCCT	58.627	20	244	1012	1255	TGATCTGAAGCAACGACTGC	60.144	20	CATTGCAAAATCATTTGCCT	58.627	20	249	1007	1255
F01_transcript_20378	1	p3	(ATC)5	15	213	227	TGGAAATGGTGGTGTTCTGA	59.935	20	AAGCTGGCATGGTGAGGTAG	60.277	20	143	182	324	CAGCAGAGAGAGAAAGGGGA	59.673	20	CGCCATCTCCCAAAAAGTTA	60.067	20	189	69	257	TGGAAATGGTGGTGTTCTGA	59.935	20	GCTATAATCGGAAGCTGGCA	60.331	20	154	182	335
F01_transcript_20381	1	p2	(AG)15	30	60	89	CTATCTATCAACCGCGCTGC	60.896	20	ACCCAAGCATCTTCTGTTGG	60.111	20	240	30	269	TATCTATCAACCGCGCTGC	59.952	19	AAGATTGTTGCCATTGAGGG	59.933	20	280	31	310	CTATCTATCAACCGCGCTGC	60.896	20	GGGTATCTCCCACCATCTGA	59.737	20	167	30	196
F01_transcript_20383	1	p2	(CT)15	30	30	59	GCAGAGCTCGTCACAACACT	59.21	20	TCAGGTTATCTCCGCAATCC	60.036	20	123	0	122	GCAGAGCTCGTCACAACACT	59.21	20	GGTTATCTCCGCAATCCTCA	60.036	20	120	0	119	GCAGAGCTCGTCACAACACT	59.21	20	CGCAATCAATGCACGATAAC	60.103	20	189	0	188
F01_transcript_20384	1	p4	(TCTT)5	20	1196	1215	TGCAACGTCTGCTCTTCGTA	60.742	20	GCTTCTTCATTCATCCCCAA	60.014	20	220	1148	1367	GCAACGTCTGCTCTTCGTAA	59.224	20	GCTTCTTCATTCATCCCCAA	60.014	20	219	1149	1367	TTGTAGGAAGAGCTGCAACG	59.22	20	GCTTCTTCATTCATCCCCAA	60.014	20	233	1135	1367
F01_transcript_20386	1	c	(AAG)5acggaagattgaagaagaagatgatgtccattcttttatcttccttgttccagctccttcttcttcatgaatgcta(CAG)6	109	7	115	--
F01_transcript_20403	1	p2	(TC)6	12	35	46	--
F01_transcript_20406	1	p1	(A)11	11	8	18	--
F01_transcript_20406	2	p2	(AT)19	38	1274	1311	TCGTGTGTTGTGTGGCCTAT	60.032	20	CGAGCAAAGCAATTCAATGT	58.92	20	184	1152	1335	ATCGTGTGTTGTGTGGCCTA	60.032	20	CGAGCAAAGCAATTCAATGT	58.92	20	185	1151	1335	TCGTCTCATCCATCGTGTGT	60.121	20	CGAGCAAAGCAATTCAATGT	58.92	20	196	1140	1335
F01_transcript_20416	1	p2	(GA)6	12	51	62	TCCCCAAATGGTCTGAATTG	60.692	20	GCTTGTTTGTTTGGGTTGGT	59.875	20	154	2	155	TCCCCAAATGGTCTGAATTG	60.692	20	TTTGGCAAATGGGTATTGCT	60.323	20	254	2	255	TCCCCAAATGGTCTGAATTG	60.692	20	GACAAGGTTTTGGCAAATGG	60.344	20	262	2	263
F01_transcript_20422	1	p5	(CTGAT)6	30	1148	1177	CCCAGAGCTTATCTTGCCTG	59.971	20	GCTTTGAAAGGGATGAGCAG	59.955	20	234	984	1217	CTACCAGAAAAGGCAGCACC	59.875	20	TGAGCAGAACCATGCAAAAG	59.988	20	193	1012	1204	CCTACCAGAAAAGGCAGCAC	59.875	20	TGAGCAGAACCATGCAAAAG	59.988	20	194	1011	1204
F01_transcript_20434	1	p1	(T)15	15	1310	1324	GCAGCTGCCATATTGGTTTT	60.103	20	GGAAGAATCTGACTAATTCTGCAT	58.008	24	236	1122	1357	CATTCTATCGTGGCGCTCTT	60.374	20	GGAAGAATCTGACTAATTCTGCAT	58.008	24	280	1078	1357	TGGTTTTGTACGACGAGGTG	59.609	20	GGAAGAATCTGACTAATTCTGCAT	58.008	24	223	1135	1357
F01_transcript_20446	1	p1	(T)10	10	30	39	TGTATCTTTGATTTTCTCTCCCC	58.637	23	TCAGGCATCAAGTTGTGAGC	59.992	20	120	3	122	TGTATCTTTGATTTTCTCTCCCC	58.637	23	TGACAAGCATCAGTGCATCA	59.986	20	152	3	154	TGTATCTTTGATTTTCTCTCCCC	58.637	23	ATCTCCCTGATTGCATCGTC	60.042	20	259	3	261
F01_transcript_20448	1	p3	(CGA)6	18	248	265	ACTCCTCCTCCTCGCTCTTC	60.096	20	GCTTGTGGGTGGGTTTATGT	59.717	20	166	143	308	ACTCCTCCTCCTCGCTCTTC	60.096	20	AGTGCTTTTGACGGAGGTTG	60.291	20	280	143	422	CTGCAAATTCCTCCACCACT	60.111	20	GCTTGTGGGTGGGTTTATGT	59.717	20	120	189	308
F01_transcript_20467	1	p2	(GA)11	22	79	100	ACCTCCAAACCCTGAGGACT	59.968	20	GTCCAAAGCATTCCAACCAT	59.797	20	258	31	288	ACCTCCAAACCCTGAGGACT	59.968	20	ATGAAGCAGCTGTTTGGTCC	60.263	20	173	31	203	AGCACACAGTCAACCGACAC	59.789	20	GTCCAAAGCATTCCAACCAT	59.797	20	236	53	288
F01_transcript_20467	2	p2	(GA)7	14	1198	1211	TTCGGAAGCTTTCCATCAAG	60.323	20	CACCACTGGCTCAGAAGTCA	60.022	20	254	1072	1325	CTTCGGAAGCTTTCCATCAA	60.323	20	CACCACTGGCTCAGAAGTCA	60.022	20	255	1071	1325	CTTTGAGGCAGTTGGGATCT	59.284	20	CACCACTGGCTCAGAAGTCA	60.022	20	213	1113	1325
F01_transcript_20474	1	p3	(GAA)5	15	275	289	CAAACTCTTCAATGGCGGAT	60.074	20	TTAAGGCGCTTAGATGGTGC	60.364	20	223	152	374	ATCAAACTCTTCAATGGCGG	60.074	20	TTAAGGCGCTTAGATGGTGC	60.364	20	225	150	374	GGCCAACCTAAACAAGCTGA	60.249	20	TTAAGGCGCTTAGATGGTGC	60.364	20	200	175	374
F01_transcript_20475	1	p3	(AGC)5	15	226	240	TCGCATCTTCAATACCCACA	60.073	20	GCAAAAGAAGCGAACCAAAG	59.996	20	200	142	341	TCGCATCTTCAATACCCACA	60.073	20	AGCAAAAGAAGCGAACCAAA	59.996	20	201	142	342	CTTGCATCGGTTCCGATAAT	59.923	20	AGCAAAAGAAGCGAACCAAA	59.996	20	151	192	342
F01_transcript_20478	1	p3	(GAT)6	18	1068	1085	CAGGCCTAAGGATTTTGGGT	60.312	20	TCTTGAACATCCACCAACCA	59.935	20	278	889	1166	AGGAGGGTGGTACAACACGA	60.422	20	TCTTGAACATCCACCAACCA	59.935	20	156	1011	1166	CAGGCCTAAGGATTTTGGGT	60.312	20	AGCAATAGTCCCGCCAAGTA	59.73	20	232	889	1120
F01_transcript_20487	1	p3	(GAT)6	18	96	113	GGACCAGAAATCAGAACCCA	59.903	20	GGTCCAACGTCTTTAACCGA	59.971	20	182	52	233	TGGACCAGAAATCAGAACCC	59.903	20	GGTCCAACGTCTTTAACCGA	59.971	20	183	51	233	GGACCAGAAATCAGAACCCA	59.903	20	CTTTAACCGATTGGCCGTTA	59.958	20	172	52	223
F01_transcript_20488	1	p3	(GAA)5	15	444	458	GTCGACGAGTTCAGCCTTTC	59.997	20	ATTGAGCCCCAAACTCCTCT	60.074	20	231	317	547	TCAGCCTTTCAAACCCAATC	60.051	20	ATTGAGCCCCAAACTCCTCT	60.074	20	221	327	547	GTTCAGCCTTTCAAACCCAA	60.088	20	ATTGAGCCCCAAACTCCTCT	60.074	20	223	325	547
F01_transcript_20493	1	p2	(TC)8	16	224	239	CATACATTGACAACCCTGCG	59.988	20	TTTTTATATGGGGCATCCGA	60.11	20	239	155	393	CATACATTGACAACCCTGCG	59.988	20	TCGCGACATCTTGTATGGAA	60.22	20	205	155	359	CTCATCAAGCCCTTGGAAAA	60.184	20	TTTTTATATGGGGCATCCGA	60.11	20	275	119	393
F01_transcript_20498	1	p5	(TCTTC)6	30	149	178	AGTCACCGATGGAAGGCATA	60.483	20	CGAGAGTGCCTTCCTTTCAC	59.989	20	274	2	275	AGTCACCGATGGAAGGCATA	60.483	20	GGATGGAAATGGAGCTGTGT	59.934	20	227	2	228	AGTCACCGATGGAAGGCATA	60.483	20	AAATGGAGCTGTGTGAAGGG	60.111	20	221	2	222
F01_transcript_20511	1	p3	(GAT)7	21	1075	1095	CCCTTTGGTGCAATGAAGTT	59.971	20	AATCCCAAAGATCAAACCCC	59.996	20	210	996	1205	TGGTGCAATGAAGTTACCCA	59.964	20	AATCCCAAAGATCAAACCCC	59.996	20	205	1001	1205	ATGTGGACACACCCTTTGGT	60.135	20	AATCCCAAAGATCAAACCCC	59.996	20	221	985	1205
F01_transcript_20512	1	p1	(A)10	10	96	105	AGCATCTGGGTGAATAACCG	59.955	20	TTAATCGCGAGTTTCTTCGG	60.335	20	144	2	145	AGGCTGACCCTTTTTCCTTC	59.691	20	TTAATCGCGAGTTTCTTCGG	60.335	20	118	28	145	GAAGGCTGACCCTTTTTCCT	59.691	20	TTAATCGCGAGTTTCTTCGG	60.335	20	120	26	145
F01_transcript_20514	1	p2	(AG)7	14	36	49	TGGCAGAAGAGAAGAAAAGCA	60.256	21	ATACCCGTGTAACGCCAGAG	60.015	20	193	2	194	TGGCAGAAGAGAAGAAAAGCA	60.256	21	CCAATGGAAACCCTAACCCT	60.046	20	150	2	151	TGGCAGAAGAGAAGAAAAGCA	60.256	21	CCTTCAATTGGACATACCCG	60.184	20	206	2	207
F01_transcript_20515	1	c	(TA)7gagagagagaaagagatataactctatttaatttgttgtacgcca(AT)25	109	39	147	TCACCAATCATTTGCTCCAG	59.648	20	AGCCATATCCTGGCAGTGTT	59.579	20	253	2	254	TCACCAATCATTTGCTCCAG	59.648	20	AAGCCATATCCTGGCAGTGT	59.579	20	254	2	255	TCACCAATCATTTGCTCCAG	59.648	20	GAAGCCATATCCTGGCAGTG	60.624	20	255	2	256
F01_transcript_20516	1	p3	(TTC)6	18	93	110	GATCATCATGAGCAACGCAT	59.641	20	GAATCTGGCGATCGATGTTT	60.043	20	242	27	268	GCAGGGAATGTTTCGAATTG	60.448	20	GAATCTGGCGATCGATGTTT	60.043	20	262	7	268	GATCATCATGAGCAACGCAT	59.641	20	GCCACTCTCGCAATTGATTT	60.221	20	197	27	223
F01_transcript_20519	1	c*	(TC)6(CTC)12*	45	39	83	GAATTTTACTGTTTTTGGCTCAGA	58.904	24	GGGACTTTGGAACAGTGGAA	59.943	20	134	0	133	GAATTTTACTGTTTTTGGCTCAGA	58.904	24	CTTTGGAACAGTGGAAGGGA	60.081	20	130	0	129	GAATTTTACTGTTTTTGGCTCAGA	58.904	24	CTGTCTGCCTGTGGGACTTT	60.298	20	146	0	145
F01_transcript_20519	2	p2	(GA)7	14	236	249	TTCCACTGTTCCAAAGTCCC	59.943	20	ATGGGGACTGAGAGCAAGAA	59.803	20	240	114	353	TTCCACTGTTCCAAAGTCCC	59.943	20	CCATATTCCACCGCCTAAAA	59.789	20	259	114	372	TTCCACTGTTCCAAAGTCCC	59.943	20	TATTCCACCGCCTAAAATGG	59.789	20	256	114	369
F01_transcript_20525	1	p3	(ATT)6	18	1143	1160	TCTCCTCCAGGCTCCAGTAA	59.943	20	GCTAACCATGCAGGGTGTTT	60	20	184	1070	1253	CATCCTACCAAAGGAGCCAA	60.066	20	GCTAACCATGCAGGGTGTTT	60	20	271	983	1253	TCTCCTCCAGGCTCCAGTAA	59.943	20	TAACCATGCAGGGTGTTTCA	59.964	20	182	1070	1251
F01_transcript_20526	1	p3	(AAG)5	15	95	109	ATCACAAACCCAATTCGACC	59.653	20	GCCATTTCATGGCAAGTTTT	59.945	20	201	2	202	ATCACAAACCCAATTCGACC	59.653	20	TGGGATTCTTATCTGGGTGC	59.894	20	219	2	220	ATCACAAACCCAATTCGACC	59.653	20	GGATTCTTATCTGGGTGCCA	59.894	20	217	2	218
F01_transcript_20526	2	p3	(GGC)5	15	491	505	CATCAAGTCCATTCGGAGGT	59.927	20	ATGGTCTTCCCACTTGCATC	59.934	20	241	461	701	CATCAAGTCCATTCGGAGGT	59.927	20	TCTACTGGCATGGTCTTCCC	60.073	20	250	461	710	AGAAGGGCTAAAAGGCCAAG	59.85	20	TGGTCTCTCCCCAAATGAAC	59.903	20	250	321	570
F01_transcript_20538	1	p3	(ACA)10	30	104	133	CCTCTACTGTATCTCTCTTCAACCAA	59.416	26	CCATCGTAACCGACAGGATT	59.813	20	234	39	272	CCTCTACTGTATCTCTCTTCAACCAA	59.416	26	CCCGGTATTGATTTGCTGAT	59.784	20	203	39	241	CCTCTACTGTATCTCTCTTCAACCA	58.188	25	CCATCGTAACCGACAGGATT	59.813	20	234	39	272
F01_transcript_20538	2	p1	(G)15	15	1173	1187	CAACATCAAACTGCGATTGG	60.111	20	TGATGGTGTGATGTGATGGA	59.273	20	252	1002	1253	ACATCAAACTGCGATTGGGT	60.384	20	ACTTGGCTCTCTTCCTGCCT	60.532	20	280	1004	1283	ACATCAAACTGCGATTGGGT	60.384	20	TGATGGTGTGATGTGATGGA	59.273	20	250	1004	1253
F01_transcript_20541	1	p2	(AT)13	26	1292	1317	--
F01_transcript_20549	1	p2	(TA)10	20	1062	1081	CTGCACAACTCTCCGGTACA	59.897	20	AATTAACACTCCAAAGCGACG	59.28	21	212	962	1173	CTGCACAACTCTCCGGTACA	59.897	20	CACTCCAAAGCGACGTATTTT	59.28	21	206	962	1167	TGACGATGAGATTGCCAAAG	59.799	20	AATTAACACTCCAAAGCGACG	59.28	21	247	927	1173
F01_transcript_20556	1	p2	(TA)6	12	1168	1179	GCTGAGGAACTTGAAGCCAG	60.134	20	TCTGGAGTCTGGATAGCCACT	58.906	21	257	1035	1291	GCTGAGGAACTTGAAGCCAG	60.134	20	GTCTGGAGTCTGGATAGCCACT	59.768	22	258	1035	1292	TTGCTGAGGAACTTGAAGCC	60.517	20	TCTGGAGTCTGGATAGCCACT	58.906	21	259	1033	1291
F01_transcript_20578	1	p3	(TGC)5	15	383	397	AAACCCATGGAATATGGCAA	60.016	20	CACGAGCCTCATCAGCATTA	59.972	20	198	288	485	AACCCATGGAATATGGCAAA	60.016	20	CACGAGCCTCATCAGCATTA	59.972	20	197	289	485	AAACCCATGGAATATGGCAA	60.016	20	TGACCAACACGTCCACACTT	60.047	20	229	288	516
F01_transcript_20581	1	p2	(GA)6	12	176	187	CTCAACTGTCGGCTCAACAC	59.467	20	GACTTTGATCCAGGAGCAGC	59.957	20	216	56	271	CAACTGTCGGCTCAACACTC	59.467	20	GACTTTGATCCAGGAGCAGC	59.957	20	214	58	271	CTCAACTGTCGGCTCAACAC	59.467	20	TTCCTCATCAAAAGGGTTCG	60.044	20	169	56	224
F01_transcript_20604	1	p3	(AAT)5	15	1141	1155	GAGGCCTCTGCACTGTATCC	59.834	20	TCATCCATTCTTGCAGAAACA	59.262	21	266	1019	1284	CCCAAGGCTTGTTGTTAAGC	59.747	20	TCATCCATTCTTGCAGAAACA	59.262	21	188	1097	1284	CCCCAAGGCTTGTTGTTAAG	59.604	20	TCATCCATTCTTGCAGAAACA	59.262	21	189	1096	1284
F01_transcript_20606	1	p3	(AGA)6	18	136	153	ATTGCTGTTGATCCAGGAGG	60.073	20	GGCTGTAGTGATTGGGGAGA	60.073	20	151	45	195	ATTGCTGTTGATCCAGGAGG	60.073	20	TGGGGAGAGGAGAGTAACGA	59.797	20	139	45	183	ATTGCTGTTGATCCAGGAGG	60.073	20	AGCAGAGGAGGATAGGGAGG	59.795	20	234	45	278
F01_transcript_20608	1	p2	(AT)22	44	14	57	--
F01_transcript_20627	1	c	(TTGAT)5tcctaatgtaattggagattttac(TA)9	67	1238	1304	CGCCCATGTAGATTTGGAGT	59.955	20	ACAGGCCAAAAGCACTCTGT	59.914	20	219	1110	1328	CGCCCATGTAGATTTGGAGT	59.955	20	ACAGACAGGCCAAAAGCACT	59.914	20	223	1110	1332	CGCCCATGTAGATTTGGAGT	59.955	20	ACGAACAGACAGGCCAAAAG	60.291	20	227	1110	1336
F01_transcript_20634	1	c	(CAC)5(CAG)6	33	86	118	CCCAGCCCCAGCTATATACTAA	59.52	22	ATTCAGCGTGATTTTGGAGG	60.074	20	268	3	270	CCCAGCCCCAGCTATATACTAA	59.52	22	GCATCCATTACGCATACCCT	59.813	20	182	3	184	CCCAGCCCCAGCTATATACTAA	59.52	22	TTGGAAGAGGAGGTGGAAGA	59.773	20	155	3	157
F01_transcript_20634	2	p2	(AT)10	20	1126	1145	TGGTGGATTTTGACAGCAGA	60.24	20	GAGCTAGGCCTGGTTCATTG	59.836	20	257	1015	1271	TGACAGCAGAGCTCAAGTGG	60.333	20	GAGCTAGGCCTGGTTCATTG	59.836	20	247	1025	1271	GTCTATTCATCAGCCGTCCC	59.513	20	CATGCATTTGCTTGGTCAAC	60.119	20	250	1060	1309
F01_transcript_20638	1	p2	(TA)9	18	163	180	GAAGACAAAGGAAAATGGGGA	60.285	21	TGGCCTTTCCATAGAGGGTA	59.523	20	269	25	293	GAAGACAAAGGAAAATGGGGA	60.285	21	TGATCTTTTGGCCTTTCCAT	59.505	20	277	25	301	GAAGACAAAGGAAAATGGGGA	60.285	21	TTGATCTTTTGGCCTTTCCA	60.555	20	278	25	302
F01_transcript_20638	2	p3	(AGA)5	15	579	593	CGGGGTTTCATCGTTTTCTA	59.931	20	CGTTTTGCTAAGGCTTGCTT	59.669	20	252	506	757	CGGGGTTTCATCGTTTTCTA	59.931	20	TTTAGCCGTTTTGCTAAGGC	59.516	20	258	506	763	AGCGTGAAGAGGGAGATCAG	59.555	20	CGTTTTGCTAAGGCTTGCTT	59.669	20	227	531	757
F01_transcript_20638	3	p1	(T)11	11	1331	1341	--
F01_transcript_20660	1	p2	(GA)7	14	34	47	GCGAGAAAGATGAAAAGAAAGA	57.888	22	TCTTAAAACCAACCCCAGGA	59.401	20	214	0	213	GCGAGAAAGATGAAAAGAAAGAG	58.835	23	TCTTAAAACCAACCCCAGGA	59.401	20	214	0	213	AAGATGAAAAGAAAGAGTGAGGGA	59.777	24	TCTTAAAACCAACCCCAGGA	59.401	20	208	6	213
F01_transcript_20661	1	p2	(AG)21	42	33	74	TTATTGGGGTTTTTCTTGCG	59.937	20	TAATTTCCCCCATTTCCTCC	59.957	20	165	5	169	TTATTGGGGTTTTTCTTGCG	59.937	20	GGCAAAACCATCCTTTTCAA	59.916	20	253	5	257	TTATTGGGGTTTTTCTTGCG	59.937	20	CATGGGTAACTCATCTGGGC	60.34	20	196	5	200
F01_transcript_20684	1	p1	(T)13	13	1107	1119	GATGGAGAAAAAGGAAGGGC	60.017	20	CTCGGGTCAACTCGAATCTC	59.803	20	173	1006	1178	TGAGTTCTCGTCGTTTGTGC	60.032	20	CTCGGGTCAACTCGAATCTC	59.803	20	119	1060	1178	AAAAGGAAGGGCAAAATGGT	59.814	20	CTCGGGTCAACTCGAATCTC	59.803	20	165	1014	1178
F01_transcript_20692	1	p3	(GTG)9	27	1072	1098	ATAATGAAGGTGGCGGTGAC	59.82	20	AAGGAAGTTTGCCTAGACTCCA	59.411	22	274	1035	1308	ATAATGAAGGTGGCGGTGAC	59.82	20	GGAAGTTTGCCTAGACTCCACA	60.661	22	272	1035	1306	ATAATGAAGGTGGCGGTGAC	59.82	20	AGGAAGTTTGCCTAGACTCCA	58.069	21	273	1035	1307
F01_transcript_20696	1	p2	(TC)12	24	23	46	--
F01_transcript_20702	1	p3	(AAG)6	18	189	206	CTGCTGCATATTCCCTCCTC	59.797	20	GGGGATTTGAGGTGGTTTTT	60.032	20	265	55	319	CTGCTGCATATTCCCTCCTC	59.797	20	GAGGGGATTTGAGGTGGTTT	60.169	20	267	55	321	CTGCTGCATATTCCCTCCTC	59.797	20	TGGTTTTTGGTGGTGGAGAT	60.21	20	253	55	307
F01_transcript_20703	1	p2	(TA)14	28	78	105	ATGCCACTGTGTTCGAGTGT	59.183	20	ACTCAAAACCCAAAATCCCC	60.032	20	164	17	180	ATGCCACTGTGTTCGAGTGT	59.183	20	GCAGCTACAAGCTCAGGACC	60.164	20	222	17	238	TGCCACTGTGTTCGAGTGTC	60.951	20	ACTCAAAACCCAAAATCCCC	60.032	20	163	18	180
F01_transcript_20709	1	p1	(T)14	14	1283	1296	--
F01_transcript_20715	1	p2	(AT)19	38	12	49	--
F01_transcript_20719	1	p3	(AGA)5	15	742	756	CATATGCGGTTGCATGATCT	59.529	20	TTCTCTACCGGCACAGAGGT	59.867	20	204	613	816	CATATGCGGTTGCATGATCT	59.529	20	GGCACAGAGGTGTCCTCTTC	59.841	20	195	613	807	TGCAGTCGAGTGATGAGGAA	60.557	20	TTCTCTACCGGCACAGAGGT	59.867	20	115	702	816
F01_transcript_20721	1	p3	(GGA)5	15	503	517	GCAGAGACGACCGCTACTTT	59.644	20	CTGTACCGGGACAACTCCAT	59.844	20	263	468	730	CCCGTCATTCCGTTTTATGA	60.692	20	GTTAGGGTTCGGGAGTAGCC	59.962	20	141	413	553	CCCGTCATTCCGTTTTATGA	60.692	20	GGTTAGGGTTCGGGAGTAGC	59.962	20	142	413	554
F01_transcript_20724	1	p2	(AT)23	46	980	1025	TCCCTGCAGCTTCTTTTGAT	59.955	20	AGGCTGCAGGTAGCTAGGAA	59.242	20	136	935	1070	GTGGGATGGACTGTGGAACT	59.817	20	AGGCTGCAGGTAGCTAGGAA	59.242	20	229	842	1070	GTCGTCGTCGAATGAGGACT	60.269	20	AGGCTGCAGGTAGCTAGGAA	59.242	20	253	818	1070
F01_transcript_20735	1	p2	(GA)16	32	1167	1198	TCTTCGGAAGCTTTCCTTCA	60.066	20	CACCAGACTGGCTCAGAACA	60.022	20	255	1053	1307	GCTCTTCGGAAGCTTTCCTT	60.096	20	CACCAGACTGGCTCAGAACA	60.022	20	257	1051	1307	CCTTCAAGCTTGCACTGGTT	60.431	20	CACCAGACTGGCTCAGAACA	60.022	20	241	1067	1307
F01_transcript_20747	1	p2	(AG)7	14	72	85	AGGTACAATTTCCTTCGGCA	59.569	20	TCAGCGGACACATATCTTGC	59.83	20	280	2	281	GTACAATTTCCTTCGGCACG	60.502	20	TCAGCGGACACATATCTTGC	59.83	20	278	4	281	GGTACAATTTCCTTCGGCAC	59.434	20	TCAGCGGACACATATCTTGC	59.83	20	279	3	281
F01_transcript_20748	1	p2	(CT)12	24	22	45	--
F01_transcript_20762	1	p2	(AG)7	14	34	47	AAAACACTCGAGCTTCCCAA	59.853	20	TTCCCCATACAAAGCCAAAC	59.801	20	258	0	257	ACTCGAGCTTCCCAATTGAA	59.813	20	TTCCCCATACAAAGCCAAAC	59.801	20	253	5	257	AAAACACTCGAGCTTCCCAA	59.853	20	TTTCCCCATACAAAGCCAAA	60.294	20	259	0	258
F01_transcript_20762	2	p3	(GCA)5	15	882	896	CACGGCGTACCTCGATACTT	60.154	20	CATGAACATATCCTGCCACG	59.948	20	262	674	935	GAATTCACGTGCGACAGAGA	59.992	20	GCACGTGCGAGCCTATAAAT	60.259	20	266	753	1018	AAATTTGATGTTCGGTTCGC	59.945	20	CGTGCACACTCATCAACCTT	59.751	20	201	851	1051
F01_transcript_20764	1	p4	(CCAG)6	24	1211	1234	ATTGGGCTGTCTAGTGTGGG	59.989	20	CAAATCACTCCACTCCTCCG	60.646	20	262	996	1257	ATGGAACCACACTTCCCAAG	59.82	20	CAAATCACTCCACTCCTCCG	60.646	20	161	1097	1257	AAATTCTTGGGCTTATGGGC	60.28	20	CAAATCACTCCACTCCTCCG	60.646	20	222	1036	1257
F01_transcript_20770	1	p3	(GAA)7	21	111	131	AAAGCCCAAACCATAAACCC	60.055	20	TCATAGGGAATGGGACAAGG	59.744	20	213	63	275	CTTGGGGAAGGGTTTTTCTC	59.912	20	TCATAGGGAATGGGACAAGG	59.744	20	272	4	275	AAAGCCCAAACCATAAACCC	60.055	20	CGCAATCCCTCAAAAAGTTC	59.685	20	270	63	332
F01_transcript_20784	1	p3	(AAG)8	24	188	211	GGGCAACTTTTAAGCAGGAA	59.338	20	GCTTCTTGAGCTGGGTTTTG	59.993	20	220	147	366	GGGCAACTTTTAAGCAGGAA	59.338	20	GGGTTGGTTGAATTTGATGG	60.029	20	257	147	403	GGGCAACTTTTAAGCAGGAA	59.338	20	GGGGTTGGTTGAATTTGATG	60.029	20	258	147	404
F01_transcript_20786	1	p3	(TAT)9	27	197	223	ATGGCTTCTTCTCCCTCCTC	59.778	20	TGTGGCAACAATCAGAAGGA	60.24	20	111	160	270	CCCTCCTCGACCCCTTATAC	59.783	20	TTGTGGCAACAATCAGAAGG	59.691	20	100	172	271	ATGGCTTCTTCTCCCTCCTC	59.778	20	TTGTGGCAACAATCAGAAGG	59.691	20	112	160	271
F01_transcript_20798	1	c	(A)10gtttttggaaggttttgatgagatgaggaattaaattatgattttcatgtagccgtagctgggttgaaacaaatgaaaatccaagtgagattaataatg(TA)7	123	1175	1297	GGTCATGCTGTTGGGAAAGT	59.973	20	GAAAAACTGATAGTATAACATGTCGAA	57.217	27	191	1139	1329	GGTCATGCTGTTGGGAAAGT	59.973	20	ATGAAAAACTGATAGTATAACATGTCG	57.118	27	193	1139	1331	TCATGCTGTTGGGAAAGTGA	60.24	20	GAAAAACTGATAGTATAACATGTCGAA	57.217	27	189	1141	1329
F01_transcript_20804	1	p1	(T)10	10	1201	1210	GGAGCTTGATCCCTACCCTC	60.037	20	AATAGGCCAATCCAACATGG	59.645	20	117	1130	1246	TGGTGATGTTGTTTCGAGGA	60.088	20	AATAGGCCAATCCAACATGG	59.645	20	209	1038	1246	GGTATACGGTGGGAGTGGTG	60.111	20	AATAGGCCAATCCAACATGG	59.645	20	224	1023	1246
F01_transcript_20813	1	c	(CAC)6(CAG)6	36	94	129	CCCAGCCCCAGCTATATACTAA	59.52	22	ATTCAGCGTGATTTTGGAGG	60.074	20	274	8	281	CCCAGCCCCAGCTATATACTAA	59.52	22	GCATCCATTACGCATACCCT	59.813	20	188	8	195	CCCAGCCCCAGCTATATACTAA	59.52	22	TTGGAAGAGGAGGTGGAAGA	59.773	20	161	8	168
F01_transcript_20813	2	p2	(AT)10	20	1137	1156	TGGTGGATTTTGACAGCAGA	60.24	20	GAGCTAGGCCTGGTTCATTG	59.836	20	257	1026	1282	TGACAGCAGAGCTCAAGTGG	60.333	20	GAGCTAGGCCTGGTTCATTG	59.836	20	247	1036	1282	GTCTATTCATCAGCCGTCCC	59.513	20	CATGCATTTGCTTGGTCAAC	60.119	20	250	1071	1320
F01_transcript_20814	1	p6	(ATCCCA)6	36	239	274	TTGGCCAAATGGAAGAAAAC	59.916	20	TATCCCTTTTTGCTGCTGCT	59.982	20	209	162	370	GTTGGCCAAATGGAAGAAAA	59.916	20	TATCCCTTTTTGCTGCTGCT	59.982	20	210	161	370	GTTGGCCAAATGGAAGAAAA	59.916	20	GCTGCTGCTGATGGTTATGA	59.979	20	199	161	359
F01_transcript_20815	1	p4	(ATAC)6	24	1	24	--
F01_transcript_20819	1	c	(TC)6gctctgtatcttcccataaaaccatcgattcttttaaaatccaagatttaccatatttcaccccactccctcctgttatccttttctggaaccag(A)10	117	946	1062	TGTAACAGGGATGATGGGGT	60.05	20	TCTTCCAATTTCCCACCAAG	59.903	20	261	858	1118	TGATGGGGTACTTGCTCACA	60.112	20	GAAGAGGAGAAGCCGAAGGT	59.957	20	274	869	1142	TGATGGGGTACTTGCTCACA	60.112	20	AGAAGAGGAGAAGCCGAAGG	60.088	20	275	869	1143
F01_transcript_20832	1	p1	(T)11	11	1102	1112	GCTTTTTCCCGAGTGTCGTA	60.249	20	CACCATTCCACATTTGACCA	60.216	20	227	1042	1268	CCTTAGGCTTTTTCCCGAGT	59.72	20	CACCATTCCACATTTGACCA	60.216	20	233	1036	1268	GCTTTTTCCCGAGTGTCGTA	60.249	20	GACCAACATTTTTCCAACGC	60.352	20	212	1042	1253
F01_transcript_20834	1	p1	(T)10	10	1157	1166	GGTGCTGCATGCAACTAAGA	60.019	20	GTACTCGGCCAGTTATTGGG	59.452	20	103	1112	1214	TCCGGAAGTGATAAACAGCC	60.074	20	GTACTCGGCCAGTTATTGGG	59.452	20	221	994	1214	ATGTTATGGACCAGCCCTTG	59.813	20	GTACTCGGCCAGTTATTGGG	59.452	20	164	1051	1214
F01_transcript_20836	1	p1	(A)10	10	18	27	--
F01_transcript_20843	1	p1	(C)19	19	1055	1073	GTCTCGGAAGCTGGTTCTTG	59.989	20	TTGGCATTTCTAGTCCTCCTACA	60.136	23	101	1019	1119	TCAAGTCTCGGAAGCTGGTT	59.989	20	TTGGCATTTCTAGTCCTCCTACA	60.136	23	105	1015	1119	GTCTCGGAAGCTGGTTCTTG	59.989	20	TGGCATTTCTAGTCCTCCTACAA	60.136	23	100	1019	1118
F01_transcript_20845	1	p2	(CT)6	12	246	257	ACCAGTGGTCTCACACTCCC	60.006	20	CTGCTGCATCAAAATTCCAA	59.809	20	260	123	382	ACCAGTGGTCTCACACTCCC	60.006	20	TGCTGCATCAAAATTCCAAA	60.193	20	259	123	381	CCAGTGGTCTCACACTCCCT	60.153	20	CTGCTGCATCAAAATTCCAA	59.809	20	259	124	382
F01_transcript_20846	1	p1	(T)11	11	409	419	ACGTTTTCCCCCAATTTTTC	60.034	20	AGCATCACCACCGCTACTTT	59.763	20	260	214	473	ATGCTTCCACTTCTTCCCCT	60.074	20	AGCATCACCACCGCTACTTT	59.763	20	192	282	473	GGTACGTTTTCCCCCAATTT	59.924	20	AGCATCACCACCGCTACTTT	59.763	20	263	211	473
F01_transcript_20854	1	p2	(AT)6	12	988	999	TTCACTTCTTCTTCCGCCAG	60.508	20	TGGGGTTGGAATTAAAGCTG	59.931	20	202	886	1087	GCTGTGGTGACGTTTGAAGA	59.88	20	GCGCTGATTTCTCTCCGATA	60.457	20	267	762	1028	ATTGCTGTGGTGACGTTTGA	60.16	20	GCGCTGATTTCTCTCCGATA	60.457	20	270	759	1028
F01_transcript_20874	1	p2	(TA)6	12	1309	1320	TCAGGCAGGCAATTAAGGAC	60.214	20	AAAAGGTGGCAATTTGTTGG	59.839	20	277	1079	1355	ATCAGGCAGGCAATTAAGGA	59.668	20	AAAAGGTGGCAATTTGTTGG	59.839	20	278	1078	1355	GATCAGGCAGGCAATTAAGG	59.668	20	AAAAGGTGGCAATTTGTTGG	59.839	20	279	1077	1355
F01_transcript_20877	1	c	(TAGC)5tcttagtataaatgcatgtctctatttatgctagcttgtggggtcgtaa(AG)6	81	1110	1190	ATGCAGCAGGCAATAAAAGG	60.23	20	CACAACCCTAAGGATGCGAG	60.647	20	256	1008	1263	TCCTATGCAGCAGGCAATAA	59.425	20	CACAACCCTAAGGATGCGAG	60.647	20	260	1004	1263	TTCCTATGCAGCAGGCAATA	59.425	20	CACAACCCTAAGGATGCGAG	60.647	20	261	1003	1263
F01_transcript_20879	1	p3	(CGA)6	18	222	239	ACTCCTCCTCCTCGCTCTTC	60.096	20	GCTTGTGGGTGGGTTTATGT	59.717	20	166	117	282	ACTCCTCCTCCTCGCTCTTC	60.096	20	AGTGCTTTTGACGGAGGTTG	60.291	20	280	117	396	CTGCAAATTCCTCCACCACT	60.111	20	GCTTGTGGGTGGGTTTATGT	59.717	20	120	163	282
F01_transcript_20880	1	p1	(T)10	10	1081	1090	GTTGCCTCCCTTGCAAAATA	60.074	20	AAAATCAACAAGGCAGCCAG	60.249	20	182	969	1150	GTTGCCTCCCTTGCAAAATA	60.074	20	AATCAACAAGGCAGCCAGAT	59.7	20	180	969	1148	TCGAGGAGGTTTGGAAGAAA	59.784	20	AAAATCAACAAGGCAGCCAG	60.249	20	156	995	1150
F01_transcript_20895	1	p2	(TA)19	38	1141	1178	GGTGAAAGAGTGAACTTGGGA	59.173	21	CCAATCCCGGAAACTATTGA	59.756	20	210	1060	1269	GGTGAAAGAGTGAACTTGGGA	59.173	21	TCCAATCCCGGAAACTATTG	59.756	20	211	1060	1270	GGTGAAAGAGTGAACTTGGGA	59.173	21	GCCAAAACAAAAGGAACCAG	59.587	20	253	1060	1312
F01_transcript_20898	1	p1	(A)10	10	1155	1164	CAACCATGGAGCTAGGATTGA	60.081	21	GTTTAGGCATGGTGAATGGC	60.339	20	280	1007	1286	CCAACCATGGAGCTAGGATT	59.006	20	TTTAGGCATGGTGAATGGCT	60.469	20	280	1006	1285	CAACCATGGAGCTAGGATTGA	60.081	21	TTTAGGCATGGTGAATGGCT	60.469	20	279	1007	1285
F01_transcript_20899	1	p2	(AT)11	22	565	586	CAAGGATGCCACCGATAAGT	59.955	20	AAAGCCAAGAAGCACCACAC	60.299	20	177	483	659	CAAGGATGCCACCGATAAGT	59.955	20	ACAAAGCCAAGAAGCACCAC	60.299	20	179	483	661	AACACCATAGGTGATGCCGT	60.263	20	AAAGCCAAGAAGCACCACAC	60.299	20	215	445	659
F01_transcript_20899	2	p2	(TA)23	46	963	1008	--
F01_transcript_20906	1	p3	(TCT)7	21	198	218	TCATCGCCAATTTGTCTTCA	60.197	20	TAACGCGGGTGTATTTGTCA	59.992	20	126	171	296	CCGCATTTTCGTTACGATTT	59.964	20	TCAACGAACACAACTGGAGG	59.72	20	274	6	279	GAGATCCCGCATTTTCGTTA	60.038	20	TCAACGAACACAACTGGAGG	59.72	20	280	0	279
F01_transcript_20915	1	p1	(T)10	10	1259	1268	GATCTCGACACCGGCATAAT	59.923	20	AGGGGTTAAATAGGAAACATCAT	57.123	23	203	1136	1338	GCTGCAGGTAATCCTTTGGA	60.214	20	AGGGGTTAAATAGGAAACATCAT	57.123	23	245	1094	1338	GGTGTTGTCACAGATGCTGC	60.328	20	AGGGGTTAAATAGGAAACATCAT	57.123	23	260	1079	1338
F01_transcript_20928	1	p2	(CA)7	14	1211	1224	GGCAGTTCTCCTGTTTTTCG	59.853	20	TGCGCTGAAGTGCAATACTT	59.638	20	117	1144	1260	ACCTGCAGATGAAATGAGGC	60.226	20	TGCGCTGAAGTGCAATACTT	59.638	20	134	1127	1260	CGTAGGTAGGATTTGCAGGG	59.587	20	TGCGCTGAAGTGCAATACTT	59.638	20	232	1029	1260
F01_transcript_20942	1	c	(GT)7(AT)21	56	15	70	--
F01_transcript_20947	1	p4	(ATAC)5	20	1046	1065	TGAGATCGTGAAGGTTGGTG	59.676	20	CCATGTCCATGTCCATGTGT	60.096	20	177	1006	1182	TGAGATCGTGAAGGTTGGTG	59.676	20	GTTGGAATCACAAGCAAGCA	59.847	20	159	1006	1164	TGAGATCGTGAAGGTTGGTG	59.676	20	TGTTGGAATCACAAGCAAGC	59.847	20	160	1006	1165
F01_transcript_20953	1	p4	(CTCC)7	28	1199	1226	TGGGTTGTGTTAAGGGGTGT	60.126	20	CACCATCTACCAAACTCTGCAC	59.662	22	208	1049	1256	ATGGGTTGTGTTAAGGGGTG	59.569	20	CCATCTACCAAACTCTGCACAC	59.662	22	207	1048	1254	ATGAAGATGGCGATGAGGAT	59.469	20	CCATCTACCAAACTCTGCACAC	59.662	22	278	977	1254
F01_transcript_20957	1	p4	(TAGA)5	20	1205	1224	AATCAGCGGGTTGACAATTC	59.939	20	CCCTTGACCAAAACAAAACG	60.37	20	278	994	1271	AAATCGGAAGAGGTGCATTG	60.074	20	CCCTTGACCAAAACAAAACG	60.37	20	145	1127	1271	GATTCAATCCGGAAACATGG	60.133	20	CCCTTGACCAAAACAAAACG	60.37	20	195	1077	1271
F01_transcript_20959	1	c	(C)10acc(CCCCA)7	48	1076	1123	TGCTTAGAAATGTGGGAGGC	60.214	20	CAAAAGTCATTTTGGCAGCA	59.849	20	261	937	1197	TTAGAAATGTGGGAGGCGTT	59.569	20	CAAAAGTCATTTTGGCAGCA	59.849	20	258	940	1197	TAGAAATGTGGGAGGCGTTT	59.569	20	CAAAAGTCATTTTGGCAGCA	59.849	20	257	941	1197
F01_transcript_20963	1	p2	(TA)13	26	1240	1265	TTTTCTCTTCATTTTGATAGCATCC	59.991	25	TTAATCCGATCAAAACAATATTCA	57.679	24	152	1155	1306	TTTCTCTTCATTTTGATAGCATCC	58.822	24	TTAATCCGATCAAAACAATATTCA	57.679	24	151	1156	1306	TTCTCTTCATTTTGATAGCATCC	57.535	23	TTAATCCGATCAAAACAATATTCA	57.679	24	150	1157	1306
F01_transcript_20965	1	p2	(GA)8	16	13	28	--
F01_transcript_20969	1	p1	(A)11	11	42	52	--
F01_transcript_20984	1	p3	(CTT)6	18	69	86	CAATTGCAATGACGATAAGATCA	59.978	23	TGGATAGGGGTTCAATTTGG	59.617	20	131	38	168	CAATTGCAATGACGATAAGATCA	59.978	23	AATCTGCGAGTTCGTTTTCG	60.386	20	264	38	301	CAATTGCAATGACGATAAGATCA	59.978	23	GCGTTGAACAGTAATCTGCG	59.493	20	276	38	313
F01_transcript_21002	1	p1	(A)10	10	48	57	GGAGCTCTCTTCCATTCCAA	59.361	20	GTAGATGGCCGGAGATTGAA	60.036	20	162	9	170	GGAGCTCTCTTCCATTCCAA	59.361	20	TGCTAGGGTTGGGTTTATGG	59.817	20	219	9	227	GGAGCTCTCTTCCATTCCAA	59.361	20	CGGAGATTGAAGCAATCGTT	60.214	20	153	9	161
F01_transcript_21003	1	p3	(TGA)5	15	1008	1022	AAGCTAGCCCTTCTCCCAAG	59.976	20	TAAGGTGACTCGCTGCCTCT	60.156	20	262	799	1060	AAGCTAGCCCTTCTCCCAAG	59.976	20	CTAAGGTGACTCGCTGCCTC	60.156	20	263	799	1061	AAGCTAGCCCTTCTCCCAAG	59.976	20	GAGCCTAAGGTGACTCGCTG	60.156	20	267	799	1065
F01_transcript_21039	1	p1	(A)10	10	1018	1027	GTGGTCCTTTTGGAGTGGAG	59.549	20	TGGACCGAATGACCCAATTA	61.09	20	270	911	1180	TGGTCCTTTTGGAGTGGAGT	59.549	20	TGGACCGAATGACCCAATTA	61.09	20	269	912	1180	GTGGTCCTTTTGGAGTGGAG	59.549	20	GAATTGGACCGAATGACCC	60.127	19	274	911	1184
F01_transcript_21039	2	p1	(A)12	12	1149	1160	GTGGTCCTTTTGGAGTGGAG	59.549	20	TGGACCGAATGACCCAATTA	61.09	20	270	911	1180	TGGTCCTTTTGGAGTGGAGT	59.549	20	TGGACCGAATGACCCAATTA	61.09	20	269	912	1180	GTGGTCCTTTTGGAGTGGAG	59.549	20	GAATTGGACCGAATGACCC	60.127	19	274	911	1184
F01_transcript_21045	1	p1	(T)10	10	440	449	ACTTGTCGCTCGTTCACTCA	59.622	20	TCATTCGTATGCAACAATTCAA	59.077	22	164	381	544	CGCTCGTTCACTCATTTCCT	60.397	20	TCATTCGTATGCAACAATTCAA	59.077	22	158	387	544	TGTCGCTCGTTCACTCATTT	59.445	20	TCATTCGTATGCAACAATTCAA	59.077	22	161	384	544
F01_transcript_21056	1	p3	(ATT)6	18	1157	1174	TCTCCTCCAGGCTCCAGTAA	59.943	20	CCAGTCATCTAAATTTCATGGGA	60.19	23	120	1084	1203	GGTGTGTGGGGAAATAATGC	60.059	20	CCAGTCATCTAAATTTCATGGGA	60.19	23	259	945	1203	CATCCTACCAAAGGAGCCAA	60.066	20	CCAGTCATCTAAATTTCATGGGA	60.19	23	207	997	1203
F01_transcript_21061	1	p2	(GA)21	42	88	129	CATCCTTTCCTCCCCATACC	60.517	20	ATGGGCCTTCACCTTTTTCT	59.94	20	169	37	205	CATCCTTTCCTCCCCATACC	60.517	20	AAGCCATGAAGGTGATCTGG	60.073	20	238	37	274	ACCCTACATCCTTTCCTCCC	59.256	20	ATGGGCCTTCACCTTTTTCT	59.94	20	175	31	205
F01_transcript_21074	1	p2	(AG)11	22	144	165	TTGCTTTACACACACCGCAT	60.18	20	AATCTTTCCACGGTGTCCAG	59.966	20	211	114	324	TTGCTTTACACACACCGCAT	60.18	20	ATCCCATGGTTCACAAGCTC	59.934	20	178	114	291	TTGCTTTACACACACCGCAT	60.18	20	AGATCCCATGGTTCACAAGC	59.934	20	180	114	293
F01_transcript_21074	2	p1	(T)10	10	1102	1111	GGAACCAAGATTTGAAGCCA	60.051	20	ATTGCAATTAGAAAGCCCCC	60.28	20	183	1057	1239	AGCCCAAGGAACCAAGATTT	59.94	20	ATTGCAATTAGAAAGCCCCC	60.28	20	190	1050	1239	CCCAAGGAACCAAGATTTGA	59.903	20	ATTGCAATTAGAAAGCCCCC	60.28	20	188	1052	1239
F01_transcript_21076	1	p1	(A)12	12	29	40	GGGTGAAACTCATATTCTATTTCAA	57.769	25	CCTTGATTGGTGTGTCATCG	59.96	20	272	0	271	GGGTGAAACTCATATTCTATTTCAA	57.769	25	TGGTGTCCGTGTTTACGTGT	59.922	20	103	0	102	GGGTGAAACTCATATTCTATTTCAA	57.769	25	GTGGTGTCCGTGTTTACGTG	59.922	20	104	0	103
F01_transcript_21078	1	p1	(A)20	20	82	101	ACAAAAACATCCTCCCTCCC	60.169	20	TTTCGAGCCAGCTTGAGAAC	60.657	20	259	50	308	ACAAAAACATCCTCCCTCCC	60.169	20	GAACCATATTCGATACCCGC	59.258	20	243	50	292	CAAAAACATCCTCCCTCCCT	60.298	20	TTTCGAGCCAGCTTGAGAAC	60.657	20	258	51	308
F01_transcript_21085	1	p5	(TGTAT)6	30	1236	1265	AGTGAGTTAAGGCTGAGGCG	59.639	20	CTTTCCCAATTTCATGTTGGT	58.798	21	171	1119	1289	AGTGAGTTAAGGCTGAGGCG	59.639	20	TTTCCCAATTTCATGTTGGT	57.765	20	170	1119	1288	AGTGAGTTAAGGCTGAGGCG	59.639	20	ACTTTCCCAATTTCATGTTGGT	59.615	22	172	1119	1290
F01_transcript_21087	1	p1	(T)10	10	1214	1223	GGATGTACCTCCTGTGCCAT	59.81	20	TACGAATTCTTCCGAGCCAG	60.344	20	120	1132	1251	CGTTAAGCCACCTACAAGGC	59.769	20	TACGAATTCTTCCGAGCCAG	60.344	20	261	991	1251	GCGTTAAGCCACCTACAAGG	59.769	20	TACGAATTCTTCCGAGCCAG	60.344	20	262	990	1251
F01_transcript_21097	1	c	(TGGTT)6ataatagattatatatatatcttgatttgatttgatttgattcctaatgtaattggagattttac(TA)7	109	1172	1280	CGCCCATGTAGATTTGGAGT	59.955	20	ACAGGCCAAAAGCACTCTGT	59.914	20	220	1085	1304	CGCCCATGTAGATTTGGAGT	59.955	20	ACAGACAGGCCAAAAGCACT	59.914	20	224	1085	1308	CGCCCATGTAGATTTGGAGT	59.955	20	ACGAACAGACAGGCCAAAAG	60.291	20	228	1085	1312
F01_transcript_21100	1	p3	(TAT)17	51	1232	1282	--
F01_transcript_21105	1	p2	(GA)7	14	31	44	--
F01_transcript_21108	1	p2	(GA)7	14	36	49	TCGCTCTGGCTTACCTGACT	60.156	20	CATCCATTTGTTGCCACTTG	59.964	20	224	9	232	GACTCGCTCTGGCTTACCTG	60.156	20	CATCCATTTGTTGCCACTTG	59.964	20	227	6	232	CTCGCTCTGGCTTACCTGAC	60.156	20	CATCCATTTGTTGCCACTTG	59.964	20	225	8	232
F01_transcript_21108	2	p1	(C)23	23	1102	1124	CTGTCATTTGTATGTGGGCG	59.988	20	CCTGAATCCAATAGACCACGA	59.94	21	151	1003	1153	CTGTCATTTGTATGTGGGCG	59.988	20	TCCTGAATCCAATAGACCACG	59.94	21	152	1003	1154	ATGGAAACGGAAGGAAGGAT	59.766	20	CCTGAATCCAATAGACCACGA	59.94	21	189	965	1153
F01_transcript_21115	1	p2	(AG)11	22	105	126	GGTAGGCCCACAAAATTGAA	59.801	20	ATACCCGTGTAACGCCAGAG	60.015	20	248	10	257	GGTAGGCCCACAAAATTGAA	59.801	20	CCAATGGAAACCCTAACCCT	60.046	20	205	10	214	GGTAGGCCCACAAAATTGAA	59.801	20	ACAGGGATGACCAAACGAAC	59.827	20	148	10	157
F01_transcript_21125	1	p3	(CAG)6	18	969	986	TACCAGCTGCCTATGGGAAC	60.096	20	ATGCAATGCCATTAAACCCT	59.301	20	220	867	1086	CTGCCTATGGGAACAGCTTC	59.836	20	ATGCAATGCCATTAAACCCT	59.301	20	214	873	1086	GCCTATGGGAACAGCTTCAG	59.836	20	ATGCAATGCCATTAAACCCT	59.301	20	212	875	1086
F01_transcript_21142	1	p2	(TC)7	14	132	145	GGGAATGTGGGGTTTCTCTT	60.169	20	CCAGGCTGCCAAGATTAGAG	59.971	20	275	19	293	AAGAGAGGCATGGGAATGTG	60.073	20	ATTAGAGCCGGAGGGAGAAA	60.166	20	273	8	280	AAGAGAGGCATGGGAATGTG	60.073	20	AAGATTAGAGCCGGAGGGAG	59.805	20	276	8	283
F01_transcript_21142	2	p3	(CAG)5	15	828	842	GCTTGGAGGGTAGCAATGAG	59.836	20	TTTGGACCTAATGGTCCTGC	59.933	20	118	792	909	AGCTTGGAGGGTAGCAATGA	59.836	20	TTTGGACCTAATGGTCCTGC	59.933	20	119	791	909	GCTTGGAGGGTAGCAATGAG	59.836	20	CTTTGCTGGCCTATACTCGG	59.861	20	188	792	979
F01_transcript_21147	1	p2	(AG)10	20	7	26	--
F01_transcript_21160	1	p2	(TC)6	12	185	196	TTTGGAGGACTCCCCTCTCT	60.186	20	CGGGCCTTACTTGAGTGTTC	59.734	20	194	62	255	TTTGGAGGACTCCCCTCTCT	60.186	20	TCGGGCCTTACTTGAGTGTT	59.734	20	195	62	256	CAAACAATTTTCAGCCCCAT	59.801	20	CGGGCCTTACTTGAGTGTTC	59.734	20	224	32	255
F01_transcript_21163	1	p3	(CCT)5	15	438	452	TTCCTCCTATCAGAAGCCGA	59.91	20	CCTCTTCACCGTATCCCAAA	59.926	20	148	397	544	TTCCTCCTATCAGAAGCCGA	59.91	20	ATCCCTCTTCACCGTATCCC	60.154	20	151	397	547	TCCTATCAGAAGCCGACACC	60.218	20	CCTCTTCACCGTATCCCAAA	59.926	20	144	401	544
F01_transcript_21168	1	p3	(TAA)7	21	1368	1388	--
F01_transcript_21170	1	p2	(AT)15	30	32	61	--
F01_transcript_21183	1	c	(T)17ggcaaaacaatcctggagtactt(TA)19	78	530	607	TTGCTTCAGCACACTTCCAC	60.032	20	GACCTTTGCATTCTTTGATCG	59.699	21	188	451	638	TGCTTCAGCACACTTCCACT	59.622	20	GACCTTTGCATTCTTTGATCG	59.699	21	187	452	638	TTATCATGCATGGGTTCTGC	59.504	20	GACCTTTGCATTCTTTGATCG	59.699	21	266	373	638
F01_transcript_21188	1	p1	(C)19	19	1070	1088	TGGAAACTGATTTTCTCCCG	60.044	20	ACCTGAAAACCCAGACCACA	60.399	20	169	1023	1191	TGGAAACTGATTTTCTCCCG	60.044	20	AAGAAGTCCAGAGGGTTGGG	60.48	20	110	1023	1132	AAACAGGTATCAGCAAGCCG	60.27	20	ACCTGAAAACCCAGACCACA	60.399	20	276	916	1191
F01_transcript_21193	1	p2	(GA)6	12	19	30	--
F01_transcript_21198	1	p2	(TA)17	34	334	367	AGCCTACGAGTCAGGTGCAT	59.898	20	TTATTGGCTGAGGTTTTGGG	59.931	20	248	305	552	AGCCTACGAGTCAGGTGCAT	59.898	20	ATAACCTTAGGTGCGGGAGG	60.332	20	276	305	580	AGCCTACGAGTCAGGTGCAT	59.898	20	GCGGGAGGAGGAGAGATTAT	59.634	20	264	305	568
F01_transcript_21205	1	p2	(TC)6	12	39	50	TTTCTTCCAACTTCTTTTGCTTC	59.088	23	GGATGATGACGACGATGATG	59.882	20	273	10	282	TTCTTTCTTCCAACTTCTTTTGC	59.088	23	GGATGATGACGACGATGATG	59.882	20	276	7	282	TTCTTTCTTCCAACTTCTTTTGCT	59.939	24	GGATGATGACGACGATGATG	59.882	20	276	7	282
F01_transcript_21222	1	p1	(T)10	10	61	70	CCACCCCTATCTCTCCCTCT	59.511	20	ACGCCGTTTCCATATACTGC	59.988	20	125	16	140	CCACCCCTATCTCTCCCTCT	59.511	20	TTCTTCAGCTACACGGGCTT	60.015	20	240	16	255	CCACCCCTATCTCTCCCTCT	59.511	20	ACGACGTCCATAATAACGCC	59.851	20	209	16	224
F01_transcript_21223	1	p1	(T)10	10	1013	1022	ACTCATCGACCCATTCTTCG	60.073	20	ATACATGGGTTGTTTTGGGC	59.551	20	195	910	1104	TGAGCACTACCTGGCTGAGA	59.726	20	ATACATGGGTTGTTTTGGGC	59.551	20	221	884	1104	ACTCATCGACCCATTCTTCG	60.073	20	TAATGATTGGTTGCCCCAAG	60.692	20	250	910	1159
F01_transcript_21228	1	p3	(CAT)5	15	88	102	TTGCTTCCTTCATCATCGAG	58.95	20	AACTCCCAACCCAAAGGAAG	60.332	20	182	44	225	TTGCTTCCTTCATCATCGAG	58.95	20	ATTATTGGGTGGATGGATGG	59.32	20	102	44	145	TTGCTTCCTTCATCATCGAG	58.95	20	GAAAACTCCCAACCCAAAGG	60.694	20	185	44	228
F01_transcript_21232	1	p1	(A)10	10	233	242	AGGTCTCGTTTCGTAGGGGT	59.994	20	GCACTACTCGAGGAAGGCAC	60.02	20	262	95	356	AGGTCTCGTTTCGTAGGGGT	59.994	20	GGCATTCGATGAGAACGATT	60.043	20	242	95	336	AGGTCTCGTTTCGTAGGGGT	59.994	20	GGCGTATCAGAATTGGCACT	60.103	20	277	95	371
F01_transcript_21239	1	c	(TC)10(TA)9	38	298	335	CAATTCCCACCTCATTGCTT	59.933	20	TGGTGCCTTTGATGGTGTAA	59.964	20	255	179	433	CAATTCCCACCTCATTGCTT	59.933	20	TTGGTGCCTTTGATGGTGTA	59.964	20	256	179	434	TTTCTGGTTCGCTCCACTCT	59.989	20	TTGTCTTCGCCATCAATCAA	60.197	20	252	137	388
F01_transcript_21247	1	p3	(CAG)6	18	365	382	CACAAATCCCCAGCAAAAAT	59.801	20	CATGAGATGGGAAAGCCAGT	60.073	20	228	330	557	CACAAATCCCCAGCAAAAAT	59.801	20	CTTCCATGAGATGGGAAAGC	59.629	20	232	330	561	CACAAATCCCCAGCAAAAAT	59.801	20	GCTTCCATGAGATGGGAAAG	59.629	20	233	330	562
F01_transcript_21249	1	p1	(T)10	10	1237	1246	--
F01_transcript_21253	1	p3	(ATT)6	18	1283	1300	GAGTGCTGCCAGCCTACTTT	59.644	20	CATCTAAAAGAAATTATTGCCCA	57.458	23	171	1157	1327	GAGTGCTGCCAGCCTACTTT	59.644	20	AACATCTAAAAGAAATTATTGCCCA	59.378	25	173	1157	1329	GAGTGCTGCCAGCCTACTTT	59.644	20	ACATCTAAAAGAAATTATTGCCCA	58.233	24	172	1157	1328
F01_transcript_21260	1	p1	(T)12	12	1081	1092	GCAGGCAAGACTACTCAGGG	60.012	20	GGAACCAGCACAAACACCTT	60.012	20	198	928	1125	AATACCGGATGACTTGCTCG	60.096	20	GGAACCAGCACAAACACCTT	60.012	20	237	889	1125	CAGGCAAGACTACTCAGGGG	59.861	20	GGAACCAGCACAAACACCTT	60.012	20	197	929	1125
F01_transcript_21262	1	p2	(AT)11	22	1191	1212	GGTTTTGCTGATGCTGAGTG	59.445	20	CCAATATGCATTTCGGACAA	59.377	20	255	1007	1261	GGTGGTGGTCGAGGTCTGTA	60.987	20	CCAATATGCATTTCGGACAA	59.377	20	210	1052	1261	TGGTGGTCGAGGTCTGTATTC	59.981	21	CCAATATGCATTTCGGACAA	59.377	20	208	1054	1261
F01_transcript_21281	1	p2	(AT)11	22	1213	1234	GGTTTTGCTGATGCTGAGTG	59.445	20	CCAATATGCATTTCGGACAA	59.377	20	255	1029	1283	GGTGGTGGTCGAGGTCTGTA	60.987	20	CCAATATGCATTTCGGACAA	59.377	20	210	1074	1283	TGGTGGTCGAGGTCTGTATTC	59.981	21	CCAATATGCATTTCGGACAA	59.377	20	208	1076	1283
F01_transcript_21288	1	p2	(TA)9	18	1156	1173	TTGCATGATAATGATGGATGG	59.201	21	CCAATCCCGGAAACTATTGA	59.756	20	264	995	1258	TTGCATGATAATGATGGATGG	59.201	21	TCCAATCCCGGAAACTATTG	59.756	20	265	995	1259	GGTGAAAGAGTGAACTTGGGA	59.173	21	CCAATCCCGGAAACTATTGA	59.756	20	181	1078	1258
F01_transcript_21301	1	p1	(T)12	12	1154	1165	AGCGATTATTTCAGCGAGGA	59.945	20	CGTTTGGCCACCAACTTTAT	59.861	20	228	1003	1230	GGTACGGTTATCGTGCGAAT	59.851	20	CGTTTGGCCACCAACTTTAT	59.861	20	266	965	1230	AGAGAGAGGGAGGGAGGTTG	59.801	20	CGTTTGGCCACCAACTTTAT	59.861	20	181	1050	1230
F01_transcript_21318	1	p1	(A)10	10	1161	1170	GGAGATTGGCGAAGAACAGA	60.34	20	AAATGCCTCTGATGTCCCAC	59.934	20	260	946	1205	GGCGAAGAACAGAGGAAGAA	59.55	20	AAATGCCTCTGATGTCCCAC	59.934	20	253	953	1205	CGGTGACAAGTCTGCTAACG	59.51	20	AAATGCCTCTGATGTCCCAC	59.934	20	113	1093	1205
F01_transcript_21338	1	p3	(AGA)15	45	58	102	TTGGGTTGAAATAGGAGGAGAA	59.939	22	GAAGCTAGAGTTTGCGCGAT	59.758	20	236	28	263	TTTGGGTTGAAATAGGAGGAGA	59.939	22	GAAGCTAGAGTTTGCGCGAT	59.758	20	237	27	263	TTTGGGTTGAAATAGGAGGAGA	59.939	22	AGCTAGAGTTTGCGCGATTC	59.758	20	235	27	261
F01_transcript_21338	2	p1	(T)14	14	1087	1100	TAAGCCACCCCACTTTGAAC	59.971	20	TCCATTGACCAAGTCGAACA	60.088	20	126	1046	1171	CTTAAGCCACCCCACTTTGA	60.103	20	TCCATTGACCAAGTCGAACA	60.088	20	128	1044	1171	TAAGCCACCCCACTTTGAAC	59.971	20	CATCCATTGACCAAGTCGAA	59.496	20	128	1046	1173
F01_transcript_21349	1	p3	(GAA)5	15	290	304	TCTTTGTTCCACCACAGCAC	59.726	20	GGTGGCTACTTGTTTCCCAA	59.971	20	221	180	400	TCTTTGTTCCACCACAGCAC	59.726	20	TGGCTACTTGTTTCCCAAGC	60.249	20	219	180	398	TCTTTGTTCCACCACAGCAC	59.726	20	CTGGTGGCTACTTGTTTCCC	59.592	20	223	180	402
F01_transcript_21352	1	p4	(GTTG)5	20	1104	1123	ATGACGAAGATGGGGATGAG	59.886	20	TGCACTGCACTGCCATAAAT	60.288	20	253	1014	1266	TTGATGACGAAGATGGGGAT	60.281	20	TGCACTGCACTGCCATAAAT	60.288	20	256	1011	1266	ATGACGAAGATGGGGATGAG	59.886	20	ACTGCACTGCACTGCCATAA	60.481	20	255	1014	1268
F01_transcript_21387	1	p2	(TC)7	14	50	63	TTCCAAAACCCTCACTCTGTTT	60.012	22	ATTCTTGGGCTTGAATTCCC	60.265	20	171	3	173	TTCCAAAACCCTCACTCTGTTT	60.012	22	AATTCCCGGACAGAGGTTTC	60.306	20	158	3	160	TTCCAAAACCCTCACTCTGTTT	60.012	22	GAATTCCCGGACAGAGGTTT	60.306	20	159	3	161
F01_transcript_21388	1	p5	(TCTTC)6	30	19	48	--
F01_transcript_21393	1	c	(TA)7catacaaatatatacagagaaa(AAG)6	54	123	176	TCCTTCAATAATGGGCGAAG	60.031	20	AGGAACATTAGGGCACAACG	59.993	20	231	78	308	TCCTTCAATAATGGGCGAAG	60.031	20	TATAAGCATCGATGGCAGCA	60.343	20	199	78	276	TTTCCTTCAATAATGGGCGA	60.395	20	AGGAACATTAGGGCACAACG	59.993	20	233	76	308
F01_transcript_21396	1	p3	(AAG)10	30	34	63	TCGGTCTGCTTCCTAAATCC	59.269	20	GAATCCCCGACTTCTTCTCC	60.015	20	240	5	244	TCGGTCTGCTTCCTAAATCC	59.269	20	GGAATCCCCGACTTCTTCTC	60.015	20	241	5	245	TCGGTCTGCTTCCTAAATCC	59.269	20	TGCCAATCTCCTTTCTTGCT	59.955	20	188	5	192
F01_transcript_21401	1	p2	(TA)30	60	1176	1235	TTCTGTGTACGCAATGCCAG	60.865	20	TCCAATCAAAAGGAAGCGTT	59.685	20	127	1134	1260	CTTCTGTGTACGCAATGCCA	60.865	20	TCCAATCAAAAGGAAGCGTT	59.685	20	128	1133	1260	GCTGCTGCAGTGGTGATACT	59.067	20	TCCAATCAAAAGGAAGCGTT	59.685	20	266	995	1260
F01_transcript_21402	1	p2	(TA)6	12	57	68	TCCACCTATCAAGCAAACCC	59.933	20	GAATCCTTCGTCGCCATAAA	60.038	20	123	18	140	AGGCTCCACCTATCAAGCAA	59.836	20	GAATCCTTCGTCGCCATAAA	60.038	20	127	14	140	AAGGCTCCACCTATCAAGCA	59.836	20	GAATCCTTCGTCGCCATAAA	60.038	20	128	13	140
F01_transcript_21415	1	p3	(GAA)5	15	401	415	TCTCTCCCTCTCCCCTCTTC	59.883	20	TTACCCACATAAAGCCTGCC	59.96	20	172	311	482	TCTCTCATTCCAATCCCACC	59.862	20	TTACCCACATAAAGCCTGCC	59.96	20	248	235	482	GCTCTCTCATTCCAATCCCA	60.158	20	TTACCCACATAAAGCCTGCC	59.96	20	250	233	482
F01_transcript_21423	1	p2	(AG)10	20	347	366	CTTCTTCCATGGCTGAAACC	59.67	20	AAACCCTAGAATGGCTGCCT	60.096	20	264	147	410	GCAGAGAGAGCGGGAGTAAG	59.333	20	ATGCGCCCAATGAGAGTATC	60.066	20	211	287	497	GCAGAGAGAGCGGGAGTAAG	59.333	20	AAACCCTAGAATGGCTGCCT	60.096	20	124	287	410
F01_transcript_21424	1	p2	(AG)17	34	86	119	TTGCTTCATTCGAAAACAGAGA	59.996	22	AGCAACACAAAGTGATCCCC	59.973	20	262	14	275	CTGTTGCTTCATTCGAAAACA	58.953	21	AGCAACACAAAGTGATCCCC	59.973	20	265	11	275	TTGCTTCATTCGAAAACAGAGA	59.996	22	TGATCCCCCATCCTCAAATA	60.088	20	250	14	263
F01_transcript_21424	2	p2	(TA)6	12	1253	1264	--
F01_transcript_21425	1	p2	(AT)8	16	190	205	CGCAACTCGTTCATCAGGTA	59.864	20	ACTCAATTGATGGAAAGCGG	60.074	20	274	16	289	CGCAACTCGTTCATCAGGTA	59.864	20	CAATTGATGGAAAGCGGAAT	59.901	20	271	16	286	TCATTCGCAACTCGTTCATC	59.805	20	ACTCAATTGATGGAAAGCGG	60.074	20	279	11	289
F01_transcript_21428	1	p1	(T)11	11	1151	1161	CTGCCGGAGTTCCAATTATG	60.46	20	AAAGGAACTGGTCAAGTCTGC	58.443	21	117	1070	1186	TCTGGTTTACCTTTGGGGGT	60.581	20	AAAGGAACTGGTCAAGTCTGC	58.443	21	271	916	1186	TCCAAACACAAAGGGTGATG	59.389	20	AAAGGAACTGGTCAAGTCTGC	58.443	21	245	942	1186
F01_transcript_21431	1	p3	(TTC)5	15	214	228	CGCCCATTTCCTTTACAAAA	59.937	20	CTGTTGGGTTTGCTTGGAAT	59.971	20	166	154	319	ATCTTTCCTTTTGGCCTCGT	60.074	20	CTGTTGGGTTTGCTTGGAAT	59.971	20	256	64	319	CGCCCATTTCCTTTACAAAA	59.937	20	TGAAATCCAATAATGGGGGA	59.95	20	267	154	420
F01_transcript_21438	1	p3	(TAT)12	36	1255	1290	--
F01_transcript_21445	1	p2	(CT)6	12	22	33	--
F01_transcript_21447	1	p6	(CCTCTC)5	30	33	62	CCATAACCTAACTGTGTCGCC	59.508	21	TTTGGGCGGATTTGTCTAAG	60.067	20	130	6	135	CCCATAACCTAACTGTGTCGC	59.508	21	TTTGGGCGGATTTGTCTAAG	60.067	20	131	5	135	CCCATAACCTAACTGTGTCGC	59.508	21	GGCGGATTTGTCTAAGGTGA	60.074	20	127	5	131
F01_transcript_21451	1	p1	(A)13	13	1143	1155	GTGGCCCAAATTTCCTCTTT	60.299	20	CGACCACAAAAAGCACCTCT	60.291	20	101	1097	1197	GTGGCCCAAATTTCCTCTTT	60.299	20	CTCGACCACAAAAAGCACCT	60.291	20	103	1097	1199	AATATTTGAACGTGTGGCCC	59.691	20	CGACCACAAAAAGCACCTCT	60.291	20	114	1084	1197
F01_transcript_21452	1	p2	(GA)9	18	33	50	GCTTTCTCAATAAAGGAACTGGA	58.941	23	AACGAAACCTTTAGGCCGAT	59.966	20	145	0	144	GCTTTCTCAATAAAGGAACTGGAA	60.126	24	AACGAAACCTTTAGGCCGAT	59.966	20	145	0	144	GCTTTCTCAATAAAGGAACTGGA	58.941	23	CTTGGCATCCTGTCTCATCA	59.787	20	200	0	199
F01_transcript_21465	1	p3	(AGC)7	21	213	233	TGCCTGTCTGCTGCTATCTG	60.31	20	AATAGTCGGTTGCAAATGGG	59.823	20	273	134	406	TGCCTGTCTGCTGCTATCTG	60.31	20	GCTCTTGCATTAGCTCTGCC	60.265	20	221	134	354	TGCCTGTCTGCTGCTATCTG	60.31	20	AGCTTCTGACGCTCTTGCAT	60.307	20	231	134	364
F01_transcript_21475	1	p1	(T)11	11	1273	1283	--
F01_transcript_21479	1	p3	(GTG)5	15	987	1001	AGGCTGATCTTCGCTGGTAA	59.978	20	TTGTGGGGATGTTCATACGAT	60.066	21	226	860	1085	GGCTGATCTTCGCTGGTAAG	59.978	20	TTGTGGGGATGTTCATACGAT	60.066	21	225	861	1085	AGGCTGATCTTCGCTGGTAA	59.978	20	CAAGGAACAAGCATCACACAA	59.749	21	264	860	1123
F01_transcript_21483	1	p5	(AGAGG)5	25	88	112	CGGAGAGGGTAGGGTGAGAC	61.041	20	GGCCACCCACCTCCTATATT	60.039	20	186	19	204	GGAGAGGGTAGGGTGAGACTG	60.118	21	GGCCACCCACCTCCTATATT	60.039	20	185	20	204	CGGAGAGGGTAGGGTGAGA	60.199	19	GGCCACCCACCTCCTATATT	60.039	20	186	19	204
F01_transcript_21483	2	p1	(T)10	10	984	993	TGCGAGAGAGAAACTGGGTT	59.989	20	AAAGGGAGATGAGAGGGAGG	59.63	20	260	943	1202	TACGGCCTTGTGCCTCTAAT	59.73	20	CAACAAAACAGACAAGCCCA	59.734	20	215	871	1085	TGCGAGAGAGAAACTGGGTT	59.989	20	AGGGAGGGAGGGAGAGAACT	60.579	20	247	943	1189
F01_transcript_21483	3	p1	(T)10	10	1225	1234	CTCGAGTTCTCTCCCTCCCT	59.945	20	GGGTACAACAACATTCAAACGA	59.769	22	133	1166	1298	CCTCCCTCTCATCTCCCTTT	59.63	20	GGGTACAACAACATTCAAACGA	59.769	22	116	1183	1298	AGTTCTCTCCCTCCCTCCCT	60.579	20	GGGTACAACAACATTCAAACGA	59.769	22	129	1170	1298
F01_transcript_21492	1	p2	(CT)6	12	49	60	GTTGGGTTTGGGGGTTTAAG	60.435	20	AAGGTATTGGTTGTGCCTCG	59.993	20	107	3	109	GTTGGGTTTGGGGGTTTAAG	60.435	20	CTCTTTTCGCACTTTGAGCC	60.132	20	252	3	254	GTTGGGTTTGGGGGTTTAAG	60.435	20	GGTATTGGTTGTGCCTCGAT	59.82	20	105	3	107
F01_transcript_21493	1	p3	(TAT)5	15	179	193	ATGGCTTCTTCTCCCTCCTC	59.778	20	TTGTGGCAACAATCAGAAGG	59.691	20	100	142	241	ATGGCTTCTTCTCCCTCCTC	59.778	20	AGTGAATGCTTTGGGATCGT	59.556	20	219	142	360	ATGGCTTCTTCTCCCTCCTC	59.778	20	AAGTTGGTCGGATTTGGAGA	59.526	20	168	142	309
F01_transcript_21494	1	p1	(G)15	15	1	15	--
[truncated: 30,353 more rows]
