# Supplementary material for: A bZIP transcription factor, PqbZIP1, is involved in the plant defense response of American ginseng
Source: PeerJ. 2022 Mar 8;10:e12939. doi: 10.7717/peerj.12939 (PMC8916028; doi:10.7717/peerj.12939)
Supplement: Supplemental Information 11 [file peerj-10-12939-s011.xlsx]

## Sheet: all.fa.complete_only.cds
Table S7. Coding sequences (CDS) of transcript sequences
>F01_transcript_0
ATGGGACGAGATTGCGAGGTGGGTCGGGTTCGGAAAGGCACCATATTTGGCAATCCGACGGACCCGGCCGAGCTCCCAAATCTCAAGGTGGTGGTGCGATCGTCACTGTCTCAGGTGCCCGAGAAGCCCCTTGGTCTTTATGATCCCTCCTTTGAAAAAGATTCCTGTGGGGTTGGATTCGTTGCTGAATTATCCGGCCAAAGCAGTCGTAAAACGGTAACGGATGCTATAGAAATGTTGGTGCGTATGACACATAGAGGTGCTTGTGGATGCGAAACAAACACCGGTGATGGGGCTGGCATTCTTGTCGCTCTTCCTCATGACTTTTACAAGGAGGTTGCCAAAGATGCTGGCTTTGAGTTGCCACCACCTGGGCAATACGCCGTGGGCATGTTCTTC…
>F01_transcript_1
ATGTCGGTCGCTTCGTATTCGGTTATTCAATTTCAAGCTGAGAACAACAGTTCCTCATCATCGTTGGTTCTTCCTTTAGCTGCTAAACTCAAGCCTCTGCTGAATCCTCAGCTCAATGTTTTAAACCGTGCTGGTGTTAAGGCCAAGGCCAAAACAAAAAAGCCCTCCTGTTTTGTCTTGGAGAATAGATTCTATAGGACGAGATTGCGAGGTGGGTCGGGTCCAGAAAGGCACCATCTTTGGCAATCGGATGGACCCGGCCGCGCTCCAAAACTCAGGGTGGTGGTGCGGTCGTCAATGTCTCAGGTGCCCGAGAAGCCTCTTGGTCTCTATGATCCCTCCTTTGATAAGGATTCCTGTGGTGTTGGATTCGTCGCTGAATTATCCGGCCAAAGCAGT…
>F01_transcript_10
ATGGAAACTCGGAGCCGGAAGCGGGCGGAGGCCACCTCATCAGCCCCTTCTTCTTCTTCATCTGGTCCAACCACTCGTTCTACCAAGCGCGCGCGTCTGTCTGCTGCAGCCAATTCTTCATCTACAGTCCCCACTGCCACTGCTGCCCCTGTTAATTCATCGATCTCGACCCGTTCACGAGCTTCAGCAATGGACGAATCCTCTGGTTCTGCTCCCCGTGGCCGACGTGGCAAGAATCAGATACCGGATAAGGATAATTCCGATAAAGGAAAAGAGAAAGAGCATGAAAATAGGTTTCGCGACAGAGACAGACTGCTTAGAGACGCTGAGAGGAACTTAAGGTTGAATATACACTCAACAGGTAATGGAGGAGAAGACGAAGAGAATGACAGCGACGGT…
>F01_transcript_100
ATGGAAGTGCTTCCTTGTTCCAATGTACACCACGCTGAAGAATCTGATTGCCCTCAACAAGGTTCTGGAATAAGTTTCGTGTATGACGGAGATTCAAACTGCATTGATCATGGAGAAGTTCAAATTACAGATACTAAAGTGGATGGTTTGGTGCTTGATGTGGAAGGATCTCATTTTGAACAGGGTGAAGGTCAGTGGACAGTTAATGAATCACCTAAGTCAGAAAGGCACTATAATGGAGATTCTTATTTTGAATTTGTGGTGGATGGACAAAAATTCTCTTGTGATTCCCATGATTCTGAAGACTCACAGGATCAGTGTACTGGAGGTAGCTTGGCTTCTGAGAGTTCTCAACTACCTCTAGATAGCGGATTGCCAAGAGGCAACAGTGACGGGACC…
>F01_transcript_100001
ATGGGATGTTTCACAGTTTTAAAGAGTAAGAAGAAAAAATCAGAGCAAAATATCTATGTCAAACATGTCAACCCTCAGGACTATATACCCACTATATTGCCTGAACCACCAACTCAAACTCGAGCTTTGCAGTCTGCACCACCTAGTTTCAGAAACAGGGTGAAACCTGTTGAGCCAAATATCAAAGTAACCAACAGTAGGACAAGGGCTTTGTCTGCACCCTCAAGCCTCGATGCAGCTGAGCAAGATGCTCTCTTTTCAGTTGACTGTGAGGAACAGGAAGAGTCCAAGAGTCGGTTTCGTCAGTCCCCAAATCCACAACCTCTTCCTCTTCCCTCGCTACACAGTGCTGCTGTTCTGAAAAATCTAGGGTGCTTCAAAGTACTGAATGCCAGTGGC…
>F01_transcript_100003
ATGAAAGGAGGGAGAAAGAAGACCAGCGGCGGTAGCAGTAGTTCAGACACCGGCGTTCAACAACACCACCTCCTTGGTCCGCCGTACGCAGACGGACTGTACGGAGAAGCTATTGATGCGGAGGAGCTGCAGCAGGAGGAATTCGAAAAAGAAGGGGAGGGCAAGGAGAGGGAAAATGAAGAGGGAGAGGAGGAAAAGGGTTATGATCAATTTGGACATCTGGAAATCGAAGAGGGAGAGGGAAATTTAGAGAGGGAAGCTGATTTTGCGCCCCCAAAACTTGCTGAGGGTTTTTATGAGATTGAAGCTGTACGCAGAAAAAGGGTTCGAAAGGGACAAGTCCAGTATCTCATCAAATGGCGAGGCTGGCCAGAGACCGCTAATACTTGGGAACCCTTT…
>F01_transcript_100004
ATGTGTTATATAAAGGAGAGAAGTAGGTACCTAAACCCTCATTTTCTAATATACGGCGCTGCTAAAGTTATTGAGACGGCTGGAGGAGAAGAAGGAGATGAGGAGGAAGACGAAGGTGGGAATCATGATGACTTGTTCATCAACCAATGA
>F01_transcript_100006
ATGCACAAAGACAACAAATATGTATTGTTTCTGGATGATGATGTTAGGCTGCATCCTGGTTCCATTGGAGCCCTAACTGCAGAGATGGAAAAGAATCCTGAGATATTTATTCAAACTGGATACCCTCTTGATTTACCATCTGGAAGTTTGGGAAGTTACTGTATTTATGAATATCACATTATATGTTTATTAGAACTGGCAATTTGGACTTTGTTCGAAAGTCTCTCCCAGCCCTTCTCACTGGACATAATTTTTGGAATTCAGGGAATACATAAGACGAACATCCAGGATACTCAAGGAACAGCTCATTATTTAAGCCAGAACTATGCAATATGGAATGAACCAAGGCCAGAATCTTCGACTATTGATAACGAAATAGCTATACCGTGA
>F01_transcript_10001
ATGGAGATCGATATAGCAATTACAGATTGCGATGATCAGAGATTGAAGACAAAGTACAAAAATGCTATCTCTGTTATTCGAAGAGCTCTTGCTCTCTACTCTATTGAAGAGGTGGCCTTTAGCTTCAATGGAGGAAAGGATTCAACTGTCTTGTTACACCTGCTTAGGGCAGGCTATTATTTGCATAAAGCAGAACTAAGTCATGCTAATGGGGATATCATTGATCATGTCATGTTTCCAATGCGGACAATATATTTTGAGAGTGGTTCTGCCTTCACTGAGATCAACACATTCACTTATGAAACAGCCTCTACTTACGGATTGCAAATGGATATTATTCGCCTAGATTTTAAGTCTGGTTTGGAGGCTCTTCTCAAGGCGAACCCAATCAAAGCTATT…
>F01_transcript_100010
ATGCCTGGGCGTCTCATTGATGGATTGAAGAGAGTAGCTGTTTGCAATCCAGTTATGCTTCTCGATGAGATTGACAAGACTGGTTCTGATGTTCGGGGAGATCCAGCTTCAGCATTACTGGAGGTTCTTGACCCTGAACAGAACAAAACATTTAATGATCACTATTTAAATGTTCCATATGACCTTTCAAAGGTGATCTTTGTTGCGACTGCAAATAAGGCGCAACCTATTCCTCCACCACTCTTAGACAGGATGGAAGTCATTGAACTGCCTGGTTATACTCCTGAAGAAAAGCTTAAAATTGCAATGCAACATTTAATTCCAAGAGTTTTGGATCAGCATGGCTTGAGTTCCAATTTTCTCCAAATTCCTGAGAGATACACAAGAGAAGCTGGTGTT…
>F01_transcript_100013
ATGGGTGGATTTTGCTCGAGGAGATCCACTGAGGATAATGCTTCAGCTGGTGGATTTCCACAAGTTAATGGTCATTTGAGTTATGGTTCTGGAGTGGTTTATCATTCCTGTGAATTGCCTGTCCAAGCTAATAACAATTCGACACCATCACCAGTTTTTGAAAGCACGGATAAGCAATTAAGAGAACCCTTCTCATTCCCTGAAGTAAATGCTATTTCTTATGGATTGAGTGTTGATGACATCAATGATGGAATACCTCACTTGTCTAGGGCTTTATCAAACAAATCTAGATCAACAATGTCTAAGCAGGTTGCGGTTGCAAAGGTTTCAGAAGTGAGTTCAATTCTAGGTAGAGCTGGAACTGCTGGGCTGGGGAAGGCTGTTGAAGTTTTGGATACA…
>F01_transcript_100016
ATGCAGCAGAGGGGCTCTCTTATTTGCATCATGATTTGTGTTCCTCCAATTGTTCATAGGGATGTTAAATCCAATAATATATTGTTGGATGGAGAGTTTGGAGCAAGAATTGCTGATTTTGGTGTTGCTAAATTTATTAATGCTGTCAACAAGGGCGCAGAATCCATGTCTGTTATTGCTGGTTCTTGTGGTTACATAGCACCAGAATATGCCTATACACTTCGAGTCAATGAAAAGAGCGACACATATAGCTTTGGAGTTGTCATTCTTGAGCTAGTAACCGGCAAGCCCACCCATCGACAAAAAATTTGGGGAGAAAGACTTGGCAGCGTGGGTACACACCACCATGGACCAGAAAGGACCTAA
>F01_transcript_100018
ATGGAGTGTACTTTCCTTGCACCATCAGATAGTTTCGTGGGATTGATCTCACCACATTTCAATTCTTTTGTCCCCTCAAGGACAGGTGAACTCAATCCTACTTTCCTCTTATGCATTACGGAAACTAATTTCATATCAACATCTGTGGTAACATATTCTTCACGAGCTTTCTTCTTCTCATTTGCAGACGGACTCAGTCTGACATTTTCGCCACCCATTTTAGATTTCCACCGCCTCTTGTATTTTGCTTTTGAAAATTTATTCAAACCAAGCTCATCAGTGTGA
>F01_transcript_100021
ATGGTACACTTCCCGTTGACTGATGCGATAGAGAAACAATTTATCAAGGCAATTAGTCTCACAGATGATACAGCTATAGCACCAGATTATATCGACCATTGGGCTCATGATAAAGATTATCCACTAATGCTTTCTGACCAACTCAAAAAGAGCAACACTATTGAGATGGCGAATCGAGATGATGATCAAATGCTATGTGACGGTTGTGTGAAACCTATATTAATTGATGATCAATTCTATGGTTGTGTTCAGTGTAATTTCTTTCTACACAAATATTGTGCTGAGTTGCCACCAAAGTTGCAACACGCATCACACCCAGAACACGAGCTCGTTAGACATAAATACACCAAACCTATCTATTACATCGAGTGCAATAAATGCGGATTCGTATGCAATGGA…
>F01_transcript_100022
ATGGTCGGACCTTCTCTCAACTATCACAACCTCCTCACTCTCAAATTCCTCTGCAGCTACGGCGGCAAGATTCTCCCCCGTTTTCCCGACGGCAAGCTCCGTTATCACGGCGGTCAAACTCGTGTCCTCGCCGTTCATCGCTCCATCTCATTTGCCGACCTATTGGTGAAACTTGGGGAATTGTGTGGAACGTCCGTTAGCTTACGTTGTAAGTTGCCGACGGAAGACTTAGATGCCTTAGTTTCGATTACCTCAGATGAGGATCTCAAGAATCTCATCGAGGAATACGATCGAGCTGCATCATCTCTGAAGATCAGAGCATTCCTTTCGCTTCCCAAATCCACCAAAAAAATGTCTCCTCCTCCTTCAACTGCATCCTCCTCCTCTTCCTCGCCAAAA…
>F01_transcript_100024
ATGTATACCACTTCTACTACTGTCCAGATGGGAAACAATCCAGATGTTTCTTTGTCAAGTGTTCCGAAAATCAGCCTGAGATCTGGTATTGTTGGCCGGGAAATTCCTGCTTTGGGCTTAGGCACTTCAGCTGATCCCCCTGTGGACTTCGATACTATTAGGCTGGCAGTTGTCCAGGCTATAGAGATCGGTTACAGGCATTTTGATACAGCTGCTCTCTATAACTCAGAGCAGCCTCTTGGTGAAGCTATAACTGAAGCAATTCAACGGGGCTTAATTAAATCTCGAGAGGAGCTTTTCATCACCTCCAAGTTATGGTGCAGTGATGCTCATCCCCAACATGTTCTTCCTGCCATTCAAAAGACACCGGGAAATTTGAATTTGGAGTATCTTGATCTG…
>F01_transcript_100026
ATGGGAGCATTGTCCCGGTTGACTGGTGACCCCAGATTTGAATCTGCAGCTTTGCGTTCTCTCCGTAAGTTGTGGAGCATGCGTAGTTCTCTGAATCTTTTGGGAACCACGCTGGATGTAGAAACTGGGGAGTGGATTGAGTACTCATCTGGGATAGGTGCTGGGGTTGATTCTTTCTATGAGTATCTGATCAAAGCCCACATTCTTTTTGGAAAAGATGAATTTTGGATGATGTTTCAGTCTGCCTACCTTGCTGTGCAGAAATATTTCAGACATGGTCCATGGTACCATGAAGCTGATATGAGGACAGGAAAAGCAACTTATTGGCAACTTACTAGCCTTCAAGCATTTTGGCCTGGTGTACAGGTACTTGTTGGGGATATTGCAGCTGCTAATTCT…
>F01_transcript_100027
ATGGAGAATTCGTACGGAGGAGGAGGAGGGAGCTGGTCGATGATCCCAAACATGATGAGCCAGCACAGTAATCCAGCAACACCTTCATCCTCCAGTCAAGATAACAACAACAACAACAACAATCTCTATCTTCAACACCAGCAGCAATTTCAACAACAGCCCCAACAATTTCAAAATCAACCGCAACAATTTCAACAGCAACCGCAGCAGCAGCGTTATCAGAGTCCGCAACAATATCAAAGTCCACAGCAATACCAAAGTCCACAACAGCAACAACAACAAAATCATCAGCACCAATCACTAGCTTCTCACTTCCATCTCTTACATTTGGTAGAGAATTTAGCCGATGCTATTGAAAATGGCACTCGGAATCAACATTCTGATGCTTTGGTCAATGAA…
>F01_transcript_100029
ATGGAGGAAGATATGCAGTCATTTGTTTCCATAAAGGCAGAGGCTACTGAAGAACTTCGAGAACACCTAGCGAAGTTGAAAACCATGTATGGCTTAGGTATTAAAGCTTTGGACAACTTAGCCAGAGAGCTTGATGGAAATTCTCAGTCAACTTTTGGACATGTGAATAATGAAGTATCTAAAAATTCGTCTGCTCTTGGTGATCTTTTTAAAGAAATAGCTTCAGAGGTTGATACACTACTAAATGATCTTCAAAATAGTCTCTACAGTCAGGAGGATAAATTGACTGCATATGCACAACAACAGCGGGAGGCACATTCCAGAGCTGTGGTTACCACACGGTCAATTTCTCAAATTACTGTTAATTTCTTCAAGACCTTAGACATACATGCATCCAAT…
>F01_transcript_100030
ATGCGACAAATTGTTGAAGTACTGAAGAGGTGGAAGAGCCGCTTAAAATATTTGGATAAAATTGATAATATCAAAATCGTGGTTCGTATGGGAATGGTTTCTCCTAACATCAATGAAGGACTGAAGAGGTGGAAGAGCCGCTTCTTTCAACATCATTCCCAGCAGCACTTGAGCTGCCAAGGTTGTGGGGAAAGTTCTGCCCTCGCTAAATGGAAAGCTGGCATGGATGGCATTCCGTACTCCTTACTCCTTGTGGCAGGACTGGCTCCTATCGGTTGTGCTCCTTACTACTTGTGGCTGTATCATAGTAAGCATGGAGAATGCGTTGAGATGATAAATGACATGATATTGGAGATTAATTTTGTTGTGAGATACATGGTTGAGGAACTTAATCAGGAG…
>F01_transcript_100031
ATGGATACTTTTCATAATTCTCTCACTAAAAGGATAACAACATGTTTCTCTCTCCTCCTGGTGCTGCAACTTTTTTATGATGGTGCAAATGCTAAAATACCACCACCCACTGTTCAATTCAACAAAGGTTTTACTCCACTCTTTGGTGATGGAAATCTCCTTCGTTCATCTGATGATAAGTCTGTCAATCTTCTCCTCAACCAGTACACAGGTTCTGGTTTCAAGTCTTCCAACCTCTATAGCCATGGATTTTTCAGTGCTAAAATTAAGCTACCATCCACTTACACTGCCGGCATAGTTGTCGCCTTCTACACAACAAACGGGGATATCTTCGAGAAGACACACGACGAATTAGATTTCGAATTCTTGGGGAATATTAAAGGAAAAGCGTGGCGGTTC…
>F01_transcript_100034
ATGGATGGAGATTCAGGTAGGTCATGGAGAAAGTATGGGCCTATATATATTGAGAAGGAGTCTCTTAGTGTGATTCAACCAGTTCCTTATCAGACTGCGAACGGAACCTTGCGTGTTCTATTGAGATCCTTTGATGGAATAGATCGAGTTTGTATGTCAGAATCCTGTGATGGTGGCCAGAACTGGAGTTTTGCAAAACCTACCAAGTTGCCCAACCCAAATTCAGGAATTGACGGGGTGAAGTTGAAAGATGGTCGTCTCTTGCTTGCATACAACACAATCTCCAGGGGTGTACTAAAAGTTGCACTCTCAACTAACGATGGAGACTCGTGGCACGATGTTGTAACATTGGAGCAGACTATGGGAATGGAGTTCTCTTATCCTGCTGTCATCCAAGAT…
>F01_transcript_100035
ATGGGAAAAAAGAGGTATCCCACAGTGAGCGAGGAGTACCAGAAAGCAGTTGAGAAATGCAAGAAGAAGCTCAGAGGTTTCATTGCTGAGAAGAACTGCGCTCCTCTTATCCTTCGTTTGGCATGGCACTCGGCTGGGACATACGATGTGAACACAAAAACAGGAGGGCCATTTGGGACTATTAAGCATCCGGATGAGCTCTCTCACGAGGCCAACAATGGTCTTGATATTGCTGTTAGGCTCCTGGAGCCCATCAAGGATCAGTTTCCACTCCTCTCTTATGCCGACTTCTACCAGTTGGCTGGAGTTGTTGCTGTTGAAGTAACAGGAGGGCCTGATATTCCCTTCCACCCTGGGAGACAGGACAAAACTGAACCACCTCCAGAAGGCCGGTTGCCA…
>F01_transcript_100039
ATGTCATATTGCACAATGATTGTACAAAATAAGGGTAGACCCATTGCCCAAGATGTAGAAACAGAAGGTCAAAGTGTGCAGGATGTAATAACTGAGAGCTCTGCCCAGGATAGCAATGTCTGTGCTCGTTTTACACAGAAGAGATCACGTAAACCCACACTGAGGTACATTGATGAATCATCAGATCAAAATTCAAGATACTCTAGGAAGAGACGTGAGATTTTTTCCTCTACTTCAAAGAGCAGATGTGAGATTTCTACCTCTACTTCAAAAGGAAAGTCTCCGGAAGTTAGACATCTCAATCACCGTCATATGGGATCTTGGACAACCGATGAATCTTTTAGCAAAGCTATTCAAGTTCCATTTGACTCAAAAGGACGGGAAGAACGTCGGAAAAAA…
>F01_transcript_100040
ATGAAGAGGAAAAGAAGCTCCCTCCGCAGATGGTTTGAAGAAGATAAAGAGACGAAGAGATTAATATCAATTGTATATGTCAATCGATTAAAATTGAGTGAGTTGGAAATCAAATTGGAAGCTGATGAATTTCAAAAATTAAGTGAGTTGACTCAACTGATTATGTAA
>F01_transcript_100041
ATGCAATATGCAGTCACCTTGGATGTTTTACACATGGTTTTCTCTTCTTTTGGACCTGTCCTAAAGATTGCCATGTTTGATAAGAATGGAGGAGTTCAGGGATTGATTCAATACCCTGATGTTCAAACAGCCGTGGTTGCTAAGGAAGCCTTGGAAGGGCACTGCATTTATGACGGAGGATTTTGCAAGCTTCATATTTCTTATTCATGCCACACTGATTTGAGTATAAAGGTCAACAATGATAGGAGCAGAGATTATACAATTCCAAATGTTCCAATATTGAACACCCAACCGTCAATCCTAGGGCAACAACCACATGCAATGGCAGGTCAAGGAGGGGCATCAATACAACGGGGCCCCAGTTTGGTCCTCCAGCTCATGAAGGGCATGCTGTGCCTC…
>F01_transcript_100042
ATGCCAAAGGAGAGGAGAGATCGTTCTGTATCTTTCGATAGGTCAAGAGCATCTCCTTTCCCATGTGGATCTAGCCGATCGCTACGATCATTGGCCAAAAATCCTTCAGAGAATGAAGAAAATGTCAAAGAATGGGAGGGAGCTCGATGCCCTGTATGTATGGAACATCCTCATAATGCAATTCTTCTCATGTGTTCATCTCACGACAAGGGTTGCCGACCCTTCATGTGTGACACAAGCTACCGTCACTCTAACTGTTTTGACCAGTTCCGCAAGTCATTTGCAGAAGCCTCACCAACAATACCTCAGCAAGAAGAAATTCCAGTTTCAACAGAGCACTCAGAAGCCTATTTGATAATTCCGGAAGCAGCGGCGACTGATTTTGAAGTGGAAAGAAGT…
>F01_transcript_100043
ATGGCTACTCTCAGCGCTGCTGATTCTGAGAAGCTCAGTAAGCTTAAGTCTGATGTCTGTGGACTCACTCAGATCAGTGAAAATGAGAAATCTGGATTCATCAACCTCGTCACGCGCTATCTGAGTGGTGAGGCAGAGCATATTGAATGGAGTAAGATCCAGACTCCAACCGATGAGGTGGTGGTGCCTTACGACATTTTGGCTCCTGTGCCTGAAGATCCTGCGGAAACCAAGAAGCTTTTGGACAAACTTGTGGTGTTGAAGCTTAATGGAGGATTGGGGACAACAATGGGTTGTACTGGGCCTAAATCTGTCATCGAAGTTCGAAATGGTTTAACATTCCTAGACTTGATTGTCATCCAAATTGAGACACTTAATGCCAAGTATGGATGCAGTGTG…
>F01_transcript_100046
ATGATGAGAGGCATGATTGAAGGAGGAGCTCGGCAGGGATTGAAAGAAAGTTTTGATCAGTTTGCTGGGTTGCTATCTCAAAATTTCAAAACACCAAATTCTGAAGCGATATTAGATAAAGATGAAATGTTGGAAAATTTGCAGACAGAGCACCAATCAGATTGGGAGTTGAGGCAACAGAATACTTTTGCAATTTTTTCTGTAATTGCAACAATTTTTATGATTTTGTACGTCTTTGTGCATATACTACTCTCTGGACCAAGTAAGCTTGAAGGCTTAGAATTTTATGGTCTCGAATTGCCAGACAGTTTTGGAGAATTAATCACCGGAGGAATTCTAATTCTGCAATTGGAGCGTGTTTATGACATGGTATCACATTTTATACTAGCTAGGTTACGA…
>F01_transcript_100048
ATGGCGGATCAGAAGCCAAGTGCTGGCGGTGGTTTCTTTGCCTCGATTGCCTCTAGCTTGTCCAATTTCGGCACCGCTATGCACAAATCAGTCAACGGTCTGATTGGTTATGAAGGATTGGAAGTTATCAATCCTGAAGGAGGCACTGAAGATGCGGAAGTAGAAGCCCAAAGAGGAAGATGGAAGCAAGAGGATCGGGATAGTTACTGGAAGATGATGCATAAGTATATAGGTTCTGACATCACATCACTGGTGACCCTCCCAGTTCTCATTTTTGAGCCTATGTCAATGCTTCAGAAAATGGCCGAGCTGATGGAATACTCCCATCTGTTAGATCTGGCAGATGAATGTGAGGATCCACACATGCGATTGGTGTACGCTTCGTGCTGGTTTATATCT…
>F01_transcript_100049
ATGTCTCTTTGGTCCTCCATATTTTTCCTTTTTACTTTTTTCTCCCCTTCCTCCATTGCTTCTTTAAAATATAAATCCTACTTTTTTACGTGTGCAGGTTTGACTTCATTGTCTCATTTGGATCTTTTTGGAGCTCATATTACGGACTCGGGCACAAACTATTTGCGCAGTTTTAAGAATTTACGGTCTCTGGAAATTTGTGGTGGAGGATTAACTGATGCTGGTGTGAAGAACATCAAAGACCTTTCATCCTTGACACTATTGAATCTTTCCCAAAACAACCACCTGACTGACAGAGCCTTGGAACTGATTTCTGGGTTGACACAGTTGGTCTCTCTAAATGTTTCAAACTCTCGTGTGACCGATGTGGGGTTGCAGCACCTGAAGCCACTAAAGAAT…
>F01_transcript_100050
ATGAGTTATTCAAATGGCCAACTTCAAGAAAATAGGAGTCCCAAAACCTACCAAGAAGAACAAAAACAACAACAACAAAAGCAGCGTCTTTGTGATTTCTGTGGCGAATCAATAGCCCTTTTGTACTGCAGAGCTGATTCAGCCAAGCTCTGTTTCAATTGCGACCGTCAAGTTCACTCCACCAATCAGCTCTTTACCAAGCACACCCGTTCCCTGCTCTGCGACTCATGTGATTCCTCCCCTTCTTCCATTTTCTGCTCCACTCACTCCTCCGTGCTCTGCCAGAACTGTGACTGGGAAAGTCACAGTCTTTCTCTCTCCCCTGTTCACGATCGAAGGCCCCTTGAAGGGTTTAATGGGTGTCCTTCGGTGACTGAGCTGTTGGCTAATTTTGGGTTT…
>F01_transcript_100054
ATGTCTTATGATGATGAAGGAGATCAAACTTTGTCAAATCATAACTTTCGTAGTGCAGATGCTGCAGGGTCTGGAGATGCTGCCATCCCGTCCCGAGTTACTTTCTGTAGTTCATATGTTAGCACAGAAGGCGAGATGGCTTACATCAATGGCACCATGCCTGTTAAGGAGGCAAATGGTGTGGTCGGTGTCGCTGAGACGTACAAGTTGGATATAAAAATGGAAGATCAACCAGACACTTCCGCTGGAAAGATGCATCAGCCTATGAACACTGTAGAGAAGGGCTCTTGGGGAATATCACAGAAGATCACCGAGCCACAGGTGATTGAATTGAGCGATGACGATGAAGAAGATGAATATCCACGTGGTCGGTTAAAGATAGTTGACCACCCGGATAGT…
>F01_transcript_100059
ATGTCAACAATTACTCCAGCTGCTCATAGAGGTTCAATTGTGCAGTCTCGGCCATTGTCATCAGTTGTTGCACCATGCCTACGAAGACATTTCCAGAAGACCATGAGTATAATATCAGATATTTTTCCTGTCATTGCAATTTCTTCAGAATCAAGCAAGCTTTCTAAGCTCTCCTATGCTTCTACTATTCCTCTAGTGTACAGGCCTCGACTTCTTCTATGTGGTGGTGAAGGCGTTGGGCTGGATCATCTGGGACCTGCAATTTTACATGAACTAGAGAAATTTCCCGTCCATTCTCTTGGACTTCCTTCTCTACTTTCTGATCCCAGTGCTAAGACGCCGGAGGAGGCGTTGGTGCATATATTTGGTGAAGCAAGGAGAACCACACCATCAATACTC…
>F01_transcript_100062
ATGCCTGGTGAGATAGCAGGAATCAAGCGTGCAACAATCAAAGTTGATGGAGAATATGCATTTGGATATGCCAAAGCAGAAGTAGGAGTGCACCGGTTGGTTCGTTTATCACCATTCGATTATGGAAATCGTCGGCATACTTCTTTTGCTGCTGTTGCTGTAATCCTTATACTGGGCGATGGATCTACTACCCGTTTTCAAATTAATGAATCTGATCTTCGAATTGAGCGAATGAAAGTTGGGGGAGCTGGTACCCGGCAAGTAAACACAACTGAGAGTGCTGTGAGGATAACTCATATTCCTACAGGAATCAGCGCCTCCTGTCAAAATGAAAGGTCACAACAACAAAACAAGGCTTCTGCAATGACTATGCTTCAATCTCGCTTAGATCAGCTTGAG…
>F01_transcript_100064
ATGTGTGCTCAGCCAACTCCTCTTTCTTCATCTTCACCAACATCAGATCGAATTCATGTGTTTTGGCATGAGGGCATGCTTAACCATGACACAGGCACAGGCGTATTTGACACAGGATTCGACCCTGGTTTTCTTGACATACTGGAAAAGCACCCCGAAAATTCAGACAGAATCAAGAACATGGTCTCCATTTTAAAAAGGGGTCCAATTTCACCCTTCATTTCTTGGCATTCTGGAAGGCCAGCTCTAATTTCTGAATTGCAAACTTTTCACACTCAAGATTATATAAATGAACTAACTGAAGCAGATAGAATTGGGGGGAAAGTGATTTGTTCTGGGACGATCTTGAATCCTGGATCTTGGCATGCTTCACTTCTAGCTGCCGGTACTACGCTGTCA…
>F01_transcript_100065
ATGGCGGAGGAGAACGGTATTTCTGCAGTTCCCATTGATTTTCCCGTCAAGAGGGCGAGAGGAGGGGAAGATAACTGTGGTGGTGGTGTTTCTGTTGAAATTGAGAATGCCAATAGCAATAAAGATTCTGGATACAACATCTCAGCTGTTATACCTGGGTGGTTTTCTGAAATTAGCCCAATGTGGCCTGGGGAAGCACACTCATTGAAAGTGGAGAAGATCTTGTTTCAGGGGAAGTCTGACTACCAGAATGTTATTGTCTTTCAGTCTTCAACATATGGAAAGGTTCTTGTTTTAGATGGAGTTATTCAACTTACGGAGAGAGATGAATGTGCATATCAAGAAATGATTACCCATCTGCCACTTTGTTCAATTCCAAATCCGAAGAAGGTTTTGGTT…
>F01_transcript_100069
ATGTGTGGTGGGGGCTTGTGGAATCCAAAGGCCCTAAGCAGTATGATTGGAGTGCTTATAGGAGCTTGTTTTCAACTTGTCCAACAACTTGGCTTAAAATTACAAGTTGTTATGTCATTCCATCAATGCGGGGGGAATATTGGAGATGTTGTTAACATCCCGCTTCCCAAATGGGTGCTTGAGGTTGGCGAAAAGTATCCTGACATCTTTTACACTAATCTGGCAGGTACCAGAGACAAAGAGTACCTCACGCATGGTGTGGATAACCTACCTCTCTTTGCAGGTCGAACTGCAGTGCAGATCTATAGTGACTACATGAAGAGCTTCAGCGCAAACATGGCCGACTTTTTGAAAGCTGAGCTCCTGACAGACGTTGAAGTAGGGCTAGGTCCTGCAGGG…
>F01_transcript_10007
ATGGAAGAGGGTCAAAGGGTTCAGCCAATTGTGGTTGATCCAGGGATTTACTTAGCTAGGAGAGTTCAAATCTTTTATGCCACCGAAAAGCGAACATTGCCCGATGCATTCAAAGTTTTCACAGGTTCTCCATGGGTCACCTTGAGCAGATCATTTCTTGAATTTTGTGTTCTTGGCTGGGATAACCTTCCGCGAACCCTTTTGATGTATACTACAAATGTGGTTTTGTCCCAAGAAGTTTATTTCCATTCTGTCATTTGCAACTCACCCGAATTTATAAACACAACCGTCAACAATGACCTGAGATATATGATGTGGGACAATCCCCCTAAGATGGATCCCCTCTACCTGAATACCTCACATTATGAGCAGATGGTCCAAAGTGGAGCTGCTTTTGCA…
>F01_transcript_100071
ATGGATATGGATGATAAGTTAGAGATATTGAAGACTGAATTGCAGCAGTTGTTAAAGAAAGGGGAAGAATTGATTCAACAGTTACCCATAAAAGCTGAATGGGTTCAACATTTACATAGCAAAAAAGAATGGATTCAACAGATACCTCCAACTCAACTTTATGTCGCAATTAGCGTGGTGTTTGTCACTATCTTTCTCCTCTTTATAGTTCGCATTTTCAAGCACAAGGCATCTAATACCATTGTACTTACTGGGCTTAGCGGAAGTGGGAAAACTGTTCTTTTTTATCAGCTGCGAGATGGCTCTTCTCATCAGGGTACTGTGACATCTATGGAACCAAATGAAGGCAGTTTTGTGCTACACTCAGAGACCGCCAAGAAGGGGAAGATAAAGCCTGTT…
>F01_transcript_100073
ATGGCTCTCAATAGCATCCTTCGCACTTCAGCCTCACGCGTTGCACCTCTCGCCGCTAGATTGATCGGCGGTCAAAGGCATTTTTGCCGCCACCCCTCTGCTCTGTTCTCTGCTGCTGCCGTTGTCACTCAAAGCAATCTCTCCGGCGAGCTCCTTCCCACTTCATTTACATCCGGCCGTCACTACTCTTCATCACCCCTCAAAGTCATTGAATCAGAAATTGAAGATTCTGATGAGTCACTCCTCAAAGTCATTGAATCAGAAATTGTATGCGCCGAGGAGTCTGACGTCTCTAACGAGGTTCAGGAGGCTCCAGAAGGCTTCCCTTTCAAAATTGAAGATAACCCTGGCCAACAAACAATCTCTTTGTCCAGAGAGTACCAGGGTGAAACTATCAAC…
>F01_transcript_100074
ATGCTAGTCGAAGATGATGATTCAACACGTCATGTTGTTAGTGCTTTGTTAAGAAATTGCAGCTATGAAGTTATTGCTGTGGCAAATGGTCTTCAAGCATGGAAAATCTTAGAAGATATGACTAATCATATTGATCTCATCCTGACTGAGGTAGCCATGCCTATTCTATCTGGAATTGGTCTTTTATGCAAGATAATGAACCACAAAACTTTCAAGAATATTCCTGTGATTATGATGTCATCCCATGATTCAATGGGGTTGGTTTTTAGGTGCCTGTCGAAGGGTGCTGTTGATTTTTTAGTGAAACCTATTCGAAAAAATGAACTAAAAAATCTTTGGCAGCATATCTGGAGGAGATGCCACAGTTCCAGTGGTAGTGGTAGCGAAAGTGGCACTCAG…
>F01_transcript_10008
ATGTCTACCCTAGAAATCGAAGCTCGAGATGTGATTAAGATAGTTCTTCAGTTTTGCAAGGAAAACTCTTTACACCAAGCTTTCCAAACATTGCAAAATGAGTGTCAGGTTTCTTTGAATACAGTAGACAGCCTTGAAACATTTGTTGCTGATATTAACAGTGGAAGGTGGGATGCAGTTTTGCCTCAAGTATCACAACTCAAGCTTCCACGAAAGAAACTAGAGGATTTGTATGAGCAGATTGTTCTAGAAATGATTGAACTTCGAGAAATGGACACTGCACGTGCTATATTAAGGCAAACCCAGGCAATGGGTGTCATGAAACAGGAGCAACCTGAAAGATACTTGCGGCTTGAGCATCTTCTTGTTAGAACTTATTTTGATCCCCATGAGGCTTAT…
>F01_transcript_100081
ATGGCTGTGGACAAGAATAAGCTAGAAGAGGAAGCCTGTATTCTTCATTTCTACGAAATAGTCCTTAGTTGGGACTATCTCCGCCTCCTTCAAGAATCCAGTAAAAACTGTAAAAAGATTGGTGATGGTAGTGCTCTGGGCTTGGTGAAGGTGAAGGATACATACAAAGATGTTAATGATTATATTTCGACATTTGAACCACTTCTGTTTGAAGAAGTGAAAGCTCAGATTGTTCAAGGAAGAGACGAGGAAGAAGAGACGGATTGGAAAACTGGCATAATAATAGAATGCAATGAAGCTGATGGATTCCACTTACCAATGGTTTTTGCGGAAGATTGGGAATCATATTCACAGAATGACCTATTGCTACTCTCGAAAAAGAAGTTTGGGGAGGGTAAA…
>F01_transcript_100083
ATGTATCCGAAGGTGAAGGTGAGACAAGAAGCACGAGATGATGAAGATGTTTATGGCAGAAGTTTTTATCAGGCTTTGGACTCTCTCTCCTTGCATATGCATAGTTATCCTTCTCCGGCAGTTAAGGAACATAAAGATGAATCCCCACCAGTAGTTGTAAGAATTCCCAAGTCTTATGTATCAAAATCAGACATGCCTTTTGCTCCTGTATCCAAAGGATCAGCAAAGAGCATTAACAAAAATGTTATAGAGGAAGAAAAACAAAATATTAGAGCTAGTTCAGTCCCCCGACCACGTGCTGTCTTATCTAGTCCAGATAATGATGGGATCGTTAGAAGCAAAAACAAGACAAGAGCAGAACTACTTTCAGGTTTGAAAAATCATAATTCATGTCAAAAC…
>F01_transcript_100086
ATGTCAAATGGCTCTTTGTTTAATAAATGGTTTCTATACATCTTTGACATACTTCTGAAGGTCATTGGATTGAACAATGTTCCATTTGCTGGAGATGAGTTTGAGGTTGTTGGCTCCCTTGATAATGCACGTGAAAAGGCGGAGTCAAGAGCAGAGACAATTCGAAATGAACGCATTTCGGCCAAAGCTGGGGATGGAAAGATTACACTTTCTTCTTTTGCTTCTGCCGTTTCATCAAGAACGCATGCTGGATTAGACTTGCACCAGCTGGTTATCATTATGAAGGTTGACCTTCAGGTAAGCATATCCATTATCTGTAGCGAAAAGCAAGACAATTTGATAAGGCTGAGTTAG
>F01_transcript_100087
ATGATTTCACAAATGCGGATATCTTGGGAAGCAGCTTATCCAGCTGTTGCAAAGAGATTACATGGTGATTGGATTGTTGATCCTGCAATTCCTGTTGTCACTGGATTTCTTGGAAAGGGTTGGAAGTCTTGTGCAGTGACTACATTAGGTAGAGGAGGTAGTGATTTGACGGCTACAACCATTGGTAAGGCATTGGGGTTGCGAGAAATCCAGGTTTGGAAAGATGTTGATGGCGTTTTGACTTGTGATCCTAATATATATAGACGTGCAGAACCAGTGCCATATCTAACTTTTGATGAGGCAGCTGAACTTGCTTATTTTGGTGCTCAGGTTCTGCATCCCCAGTCTATGAGGCCTGCTAGAGAGGGTGATATTCCTGTTAGGGTTAAGAATTCTTAC…
>F01_transcript_100093
ATGCCGGATACAGAGGAAGGTGTTACCTATGAAAACCAAGATGAGGATGCTGTGGCAATGAATGAGGAATCACCTTCAAGTGGTTTATTGAATTTGAATCAACCTGGGGATGATGGTACTCATGGCAATGATGATGCTTGGAGCATGGACTGTTCGACAGTTGTTCGGGTGAAGACTATACACATTAGTTCCCCGATATTGGCAGCAAAGAGTCCATTTTTCTTTAAGTTATTCTCAAACGGGATGAGAGAGTCGGAGCAGCGACATGTGACTATACAAATCCATGGCTCTGTGGAAGCTGCCTTGATGGACCTTCTAAATTTTATGTACAACAATACTTTGTCAACGACCACGCCTTCCGCTTTACTAGATGTTCTGATGGCTGCTGACAAATTTGAG…
>F01_transcript_100095
ATGGATGCTTGGAGTCTCCATCTGGTAAATTCCGTACGTCGGCAGCCAAGTCCTGTATCTACTAAATGTAAATTTTTTGTGTGCCGGTCTGTTTTTACACCAATTGGAGGAAATGAAATTCCTGTTCTAAAAACAGCTGCAACAGTGTTGACAAGGTCATACAATGCCTTCCATAGAAGCCCTGTTGTACTAAAGTTAGTTCCAGCAGTTGGTATTATTGTTTTTGCTGCATGGGGTCTTGGGCCATTTGTGTGCCTGTGCAGAATCCTTTTACTCCAGAAAAACGACGGTAGTTGGAAAAAGAGTAGCACACACTATGTTTTGACTTCGTATCTTCAACCTTTGTTGCTATGGTCTGGCACAGCACTTATCTGCAGAGTACTGGATCCAGTTATTCTA…
>F01_transcript_100096
ATGGCGGACGAAGTAGTACACCACCCACTTGACAAGAGTTCCGAGGTTGAGACCACAGATCGTGGCTTATTTGATTTCTTGGGGGGGAAGAAAGACGAAGACAAATCTGCTCCTGCTGATTATCAGCAACAGGAGGAGATCGCCACTGAATTCGAGCAGAAAGTTCATGTTTCGGAGACCGAGCCCAAGTTCGAGGAGTCAAAGGTGGAAGAAGAAGAAGAGAAGAAACCCAGTTTACTTGATAAACTTCACCGATCTGGAAGCAGCTCTAGTAGCTCTTCGAGTGATGAGGAAGAAGTAGAAGAGGGAGGAGAGAAGAAGAAGAAGAAAAAGAAGAGTTTGAAGGAGAAGATTCACAAGGAAGAGGACACCTCTGTGCCGGTAGAGAAAAAGGGTATT…
>F01_transcript_100098
ATGGAAATCCATGAAGATGGCAGCATCCCTTGTCCCCCAGAAAATATGGGTGGATGTGGTGAAGGCATATTAATATTGAAGCGAGTCTTACCAGAAAATTGGGTTTCAAAGTTGTTAGTAAAAGCTGAAGAATTATCTGAACTTTGTAAACTAAAGGACATGCCCGAAACTCCTGCATGGTCGACGTGTGAATTTGACACTGCCAAAGAAAAGTTACGAAAAGCGGCTTCTCGAGAAGATTCGGATGACAACTACTTGTATTGTCTAAGCGCTGTAGATATTCAAGCTGGGGATTTGAAGCATTTTCAGTCGCATTGGGTAAAAGGCGAACCAGTGATTGTGAGTAATGTGCTTGAAACTACATCTGGTTTGAGCTGGGAACCAATGGTTATGTCACGA…
>F01_transcript_1001
ATGGGTATTAGTCTTGAAGAGATCAAAAATGAGACTGTTGATCTGGAAAAAATTCCAATAGAGGAAGTGTTTGAGCAGTTGAAATGCAGCCGAGAAGGTCTAACTTCCGACGAAGGAGCCAACAGGATTCAAATCTTTGGACCCAACAAATTGGAAGAGAAAAAGGAAAGCAAACTACTCAAGTTTCTTGGGTTTATGTGGAATCCGCTCTCGTGGGTCATGGAAGCTGCAGCCATAATGGCCATTGCGCTGGCTAATGGTAATGGGAAGCCCCCGGATTGGCAAGATTTTGTCGGCATTATTTGCTTGCTTGTAATCAACTCAACCATTAGTTTCATCGAAGAGAACAATGCCGGGAATGCTGCTGCAGCACTTATGGCTGGTCTGGCTCCCAAAACT…
>F01_transcript_100100
ATGGCTACAAATGTAAAGGCTTCTACTATCTGGAATTCTTTTCGTCTGACTGGCCCTACCATGCCCTGGCATAGCTTGGTTTGGCATAAGACTGTGCCACCTAGGCAATCATTTATTCTCTGGCTTGCTTTTCATAAGGGGCTTCGGACCCTTGACAGATTGACTCAATTTGGCCTTGATATCAACTCTATGTGTGTGCTTTGCTTGAATGATAGGGAAACCTTCAACCATTTATTCTTTGATTGCTCCTTTTCATTTCAAATTCTGGTTGATGTTCTTAGGCAGTGCGGCTGGAGAGGATTTAGTAGAAGTTGGACTTCTATTACTAGCTTTATCTCTAGCCGTTCCTGCATTAATTTTCACTCTAGCCTTCTCCATTTTGGGTTTGCTTCTGTGGTC…
>F01_transcript_100101
ATGGATGATGTGAAAGATAAATTCAAGGGTTTTATGAAGAAAGTCAACAATCCATTCTCATCTTCTCCTTCAGGTAAATTCAAAGGTCAAGGTAGAGTCTTGGGTTCTTCGTCTTCTTCTTCGGCTCCTTCCAATCCAATTCTCAGTTCTACCCCAAATCGCCAGCCTCATAATTCGGAAAATTCGAAGCCTTTGCCTCAACGAAGGTATGATTCCGATAATCAAGTCCAGAGTAACTTGAGTAAATTGGAGCCAAATGCTAAACCATCAAATGGGTTTGTAGCTTCTGACTCAAATAACACTAAGCCGTTGCCTCAAAAAATCAACAATTCTGACATTGAAGTTCAAGGTAAGTCGGATAATAAGAGTAATTCGGACTCTAATCCGAAATCAGTTGAT…
>F01_transcript_100105
ATGATCTCCAAAGCCCCATGGTATCTACTTCCTTTGGCTTGGGCATATACAGGAACTGCAATCACAGGGTTCTTTGTTATAGGCCATGACTGTGCACATAAATCATTCTCAAGGAACAAATTGCTGGAAGACATTGTTGGAACTTTGGCCTTTTTGCCGCTGATATACCCCTATGAGCCATGGCGTTTTAAGCATGATCGGCATCACGCAAAGACAAACATGTTGTTGGAGGATACAGCTTGGCACCCTGCTAAAATTGAGGAGTTTAATTCAAGCCCAATTTTCCGTAAAGCAATTATTTTTGCTTACGGTCCATTACGGCCTTGGATGTCTATAGCTCACTGGTTGATCTGGCATTTTGATCTGAAGAAGTTCAGACCGAATGAAGTTCAAAGGGTG…
>F01_transcript_100106
ATGGGTATTGCAAGCACTGCTTCATTCTTGCCTCAAACCCCACTTGGTGAAGCTTGCTCAAGAATGGATTTGACTGCCATACACGAGATCTTAGAGAAGATCGCTTACAAAGACGACGAGGGAGTGACTAATGAGGTTAAAATTAATATTTCAAACTTTGCCACTACACTCGAGCAGGAGTACAAGATGTATATAATGTTGTAA
>F01_transcript_100110
ATGGAGGTTACATTGTTATGTGTTCATGCTAGTCTTTGTCTGCAGAATAAAGCCACAACTGGAAAACAGGGGCTGGGCATTAGGGACTGGCCGAAGAAAATAGTTGGTTGCTACTTTCAGGGGAAGAATACATCTTTCGACGACAGCAATGGCAAGGATTCTGCAGATTCTAGTACTTCACCAAAACGTAAATTTGATGTCACGTCAGAAAAGTGCAAGAGAGATGAACCAAAAGTAAAGCTAATAAAACTGTGTAGACAGCTTCTTCAGTTCTTCGTCAATCTAAAAGAGGTCTCTCACAACCACATTCCTTTACTCACCAATGGAATGGAGCTAATATTAGGGTTGTGGATCCAGTGA
>F01_transcript_100114
ATGGCAACCGGTCTTTTACCCTTCCGACCTACCGGAATCCAAGCCTGCGCGACGTCTGGCCGCCGGAAACCTGAATCACAAAACCAGAAAAGTTCATCTTCTAAGTGGTGGACCCCGCTGTTCAGCTGGTACTCCGAACCAGACTACTTTGAATCCGAAAATAACGTCAACAACAAGTCCGATCTCTCCACCAAAGTTGAGGCCAAGTCGGACTCGGATCTCGGATCGATTCCGATGAGATCTCGCGTCGCTCCCGGAAGTTTCACCGAAGAGAAGGCGAGAAAGCTCCGGATGATGACAAAAGACACGGCTTTTCATGATGTCATGTATCACTCAGCTATTGCATCTCGTCTCGCTTTTGATTACATTGACCGGTCCGATCTATGA
>F01_transcript_100117
ATGAGATGTGCAAGTTTTGTAGTTAAAGAACCAATGGTAATTGGCCATGAGTGTGCTGGGGTAATAGAGGAAGTTGGTAGTGAAGTGAAGACTCTGGTGCCAGGTGATCGTGTAGCTCTAGAGCCAGGAATTAGTTGCTGGAGATGTGATCTTTGCAAAGAAGGAAGATACAATCTATGCCCTAAGATGAAGTTTTTCGCTACGCCACCAGTTCATGGTTCTCTTGCCAATCAGGTGGTACATCCTGCAGATTTATGTTTCAAACTTCCTGATAATGTGAGTTTGGAAGAAGGGGCAATGTGTGAACCATTAAGTGTTGGAGTGCATGCTTGTCGTCGTGCTAACATTGGCCCTGAGACAAATGTATTGATAATGGGAGCAGGACCAATCGGCCTTGTT…
>F01_transcript_100118
ATGTGTTGTTTGTTGGGACCCTTGATTTATTATGTTTGTGATCCGGTCACCAGGCAATGGATCACTCTTCCTAGGGGAAGACACAATGCTCCAAATCGACACCCGATGTTTTTTGGTGAGGGGCTTGTTAGCAAGATTAATGAGGATAATGTGCTTACTAGCTACAAGGCTGTGCGGGTTGAGTGGCTTTCTGTGGAGTCTAATTTTCTCAATTTGGAGACTTTTTCATCCGAGACTGGTACTTGGACTGAATATCGGCTATACTGCCCTAAAAGAATCCGGATGCTTAAGCGCGGGGGAGGGCCTATACATTTTAATGGGATACTGCATTGGTTTGTATATGATCATGGGATGGTAGCTTTTGATCCTTATAGGGATACTAAACACTGTCGATTGATT…
>F01_transcript_100119
ATGGGCTCTCAGATTCTCAAAATCTCACCTTTTACCTATTCTAGAACCCTAACTTTCGATTCCTCCCCTCTCTCTCGTTTCCTTCCAAAGACAGTTGTACCAAGTGCTAGTTTATTCAATACTCAATTCAGATTTTCTTCATTGAAAACAATTTGTCATACTAAATTACCTTCTGGGTCTGGTGGGTTTTTTGGTCGGACCAAGAGAAGCTTCAGAGGTGGGATTGTAGCCATGGCAGCACCTGGTTCAGTTCAGAAGTCGGAGGAGGACTGGCGCGCAATTCTTTCTCCCGAGCAGTTTCGGATTCTAAGACAGAAAGGCACAGAGTACCCAGGCACAGGCGAATATGACAAGTTCTTTGGTGAGGGAGTCTACACCTGCGCAGGATGCGAAACTCCT…
>F01_transcript_10012
ATGGCATATCAACCGATTCGGGGAACTGGGTTGGGTTTGCAATTCTTGAATTATCCGTTCGGGGACACCACTTATACAAAGGTGTTTGTGGGAGGGTTAGCATGGGAAACAAAGAGTGAGACATTACATAGTCACTTTGAGCAGTTTGGGGAGATCCTTGAGGCAGTTGTTATCACTGATAAGCATACTGGTCGATCAAAAGGCTATGGTTTTGTGACATTTAGTGATCCTGAAGCTGCGAAGAGGGCTTGTGCTGATCCATGTCCAGTCATAGATGGTAGGAAGGCAAACTGTAATTTGGCTTCACTTGGGCGGCCTCAACCATCGCTTCCTTATGGACGTACGAGAACAGCTGTGCCCTATCTTGGAAGCCCACAAACACTTAGGGGGCCGTATGCT…
>F01_transcript_100120
ATGAGGCCCGGTCAGTACCTCCAGCTTCGATTTCCGGGCATTGAAAAGTCATCATTTCTCGCCATCGCGTCGCCACCGTCTCTCGCCTCCTCAAAGGGCGTGTTTGAGTTTTTGGTGATGAGCATAGCTGCCTGCACCGCGGAGCTGCTTTTTGGATTTGGTGGAGGTGATGTGGTTGAATTGACTCCAGCCATGGGGAAAGGATTTGAAATTAATCAAATCTCACCACCCGAGGATTATCAGTCGGTTCTTATATTCGCTACCAGATCTGGAATTAGCATTTACCTTCACGGACAAAGAGAGGGATGCTCATTACCTACAGGGTCTTCTTCCCCCAGTTGTTGTCAATCAAGAGCTCTAGGAATATGCCAAACTTCTACATGA
>F01_transcript_100121
ATGGCGAAACAGCTATACGGCTACAACACAGCAAGCTACGGAGGAGCGGCAGCATCGAATCTGTCTAGCCTTTACTCATCGGCCAATCAATACCTCGCCGGCGGTTACCTGGCTTCGGATCCCTACTCCTCCGCCTACTCTTCCGCCTACTCCTCCATCACCGACAGAACTTCCTCCATGCTTTACGGCCATTCCGACTCTAGGTCATCGTGGCCCGGTCCACCGGGCGTTGATGTTGGTTCTTCTGCTGCTTCGGTTGACCCTCTTACTGGCTTAAAGCGCTCCTCCGCTGAAACACTCTATCACCAGACTGCTCTGGGTTCCCAAAATACAATTGGTCAAAGTGAAGCTTGGTTTACTGCCAATTATTTGGCCAAGCGCCCTAGATTCGATGGTGCA…
>F01_transcript_100125
ATGGCTTTCCTCATCTCTCAAGGTGCAGCTCCTGGAGCATTGACAGATCCTTCACCCCAAATATACGACAAGCAGAACTCTGGCAGACCTAGCTTCCAGCAAAGGACACAAGGGAATTGCTGGTTATCTAGCCGAATCTGCATTGAGCTCCCATCTTTCATCACTTAA
>F01_transcript_100126
ATGGATATGATTTATTACCCACTGGGGAGGTCTTCTTACGAGGACTCCATCAAAGTCTTGGAGGCGGACATACAGTATGCCAATGCTTTGGCTGCTGCCATTCCTAGAGGGAAGGGTGGTGCTCAACTTCAAATGAAATTGGTATACAGTCACTTGGCACCCCTCCTTTTGATTCTGCTCCAGTGGATTGACTGTTCGTGCACATGTCTAGTTCCCAGATATCTAAATCTTTTCCATGTCCTTATATATAAGGTATACACAGATGGGAGACCTAACATATCTGCACACGGAAGGAAGGCAACTATTAGCGACTTCTATGCTGTTATATTGCCATCTCTCCGTCGACTCCATAATGACTTAGTAGATCTTGATAACGTAAACGATGAGAAGCCTGGAATG…
>F01_transcript_100129
ATGGTGGGAACCCAGACAAGTTCTTCTAATGAAGAAATGAAAACTGATTTAAAGTTTGAAATCTCTCTTTGTGGGGATTTACTCTCTGGTGGCATGGGTTTGAGTGCGGCTGCTGAAGCTTTCGACACACACCGCATCTCCGAGGAAGAATTTAAACTTTCTGCAGTATCACTAGTTAAGAATGAGAACCTAGTTGTCAAATTCCAAGAGATGTACTTGCCATGGGACAAAGCTGCACCAATTGTTCTTGGAATGGCAGCCTATGGTTTAGTTTTACCTGTTGAGCACAGTGATGCAATTCCTGTCGAACAGGGTGAGGCACCAAATCCCAGAGAAGATGAGTCTGGACTCAGTTCAACTCCTTCTGGGCGTAGGTGGAGGCTCTGGTCAATCCCATTT…
>F01_transcript_10013
ATGGAAAGAATCATCGGAGGAAAGTATAAGCTCGGGCGGAAGATCGGAAGTGGATCATTTGGGGAAATTCATCTAGCTACCCATGTTGATACGTGTGAGATCGTTGCAGCGAAGATCGAGAACAATAAGACAAAACATCCACAACTTCTGTACGAGGCCAAGTTATATAATATTCTTCAGGGAGGAAGTGGTATACCTTGCATAAGATGGTCCGGTATAGATGCTGATGACAATATCCTTGTCCTTGATTTGCTTGGACCAAGTCTTGAAGATCTGTTTGTTTATTGTGGGAGAAAGTTCTCATTGAAGACCGTCTTAATGTTGGCTGATCAAATGATAACAAGGATAGAATTTGTGCATTCTAAAGGGTTTCTGCATCGGGATATTAAGCCTGATAAC…
>F01_transcript_100130
ATGGCTACTCACCGGCGGCGCCTCCAGCACAACCGTAACCGATTCCGTTTCATTATTCCAGCAATCTCCGCCGCCTCCGCCGCCATCCTCATCTTCCTCGCATTTCTTTATTTACTCGCTCCTTCTCCCGTCAACAATGATCAGCTCCACCACCACCAGCGTCATTCGTTGATAGGTAATGGCGATGGTGATGCTGGTAAAGTGAGGGAGTTTAGCGTTCCGACTGCTGGAGATATATCTAATCGTGATATCTGGAGCTCAAGGATGTCTAAATTCTACTATGGATGCAGTAATGCCAGCAATAAATTTGCAAAAGCTGGAGCTATCACACGGCCTAATCGGTACTTGTTGATTGCAACTAGTGGTGGTTTAAACCAACAAAGAACTGGGATTACAGAT…
>F01_transcript_100131
ATGCTTAATTCATCACTCAACCATTTACATGCTCAATTTATGAACCAAAATTCCATCGCAAAGCTCATAATACTCACCATGAACCAGCACTACTCTTATTTGTTTGTGTTGGTGTTTTTTATCGTAATATTTAGTCCTGCGTTTTCATCTTCACTGCCTCATAGTATGAGTAAAGGTTTATGTCTTTCGGTGGAGAATTCAAAGGATGTTTTAGTTTCACCAAACAAATTGTTCACAGCCGGCTTTCATCCAGTTGGTGATAACGCTTACTCCTTTGCAATTTGGTACACTAAACCATCCTATCCTTACAGTAATCACCACCAAAATCGGACCATTGTTTGGATGGCAAATCGTGACCAGCCCGTAAATGGAAGACTCTCGAAGCTCTGCCTGCATAAA…
>F01_transcript_100133
ATGACTGACGAATTTTTAAAAGCGGTGGAAGATGGCGTTAGGCTCTCGAAGAGGATATACTTTGGGAAGGATCGGTCGGTGGCGCCGCCGAAGCCTATGGCGGCGATGGAGAAGTCTCTGCAATCGTTCCTCCCGTCGGCTCCTATGGTTTACGCCGTGATCCCCGATCCGACGGTCGTTGATAATCCCGACATTCCGAGCTACCAGCCGCACGTGCACGGAAGGTGTGATCCTCCGGCTTTGATTCCGCTTCAGATGAACGGGATTTCAGTTGAAGCTGATTGTTATTTGGATACGGCGTTCGTGACGATTAGTGGCTCCTGGAGAGTTCATTGTGTTATGGGAAGCAAGCACTGTGATTGTCGTATTGCCATTCCTATGGGCGAACAGGGTTCAATT…
>F01_transcript_100134
ATGCGGGAGATTAAGTTGCTGAGGCTCTTACGGCATCCTGATATTGTCGAAATTAAGCGCATCATGATTCCACCCTCAAGTCGAGACTTTAAAGACATATATGTTGTTTTTGAGCTCATGGAGTCCGACCTTCATCAAGTCATTAAAGCCAATGATGATTTGACGCGTGAGCACCATCGATTTTTTCTGTATCAGATGCTACGTGCTTTGAAATATATGCATACAGCTAATGTGTACCATCGAGACCTTAAACCGAAGAATATATTGGCAAATGCAAACTGTAAACTCAAAATATGTGATTTCGGACTAGCAAGAGTCGCTTTTAATGACACTCCAACAACAACGTTTTGGACGGATTATGTAGCTACAAGGTGGTATCGGGCTCCTGAGCTTTGTGGA…
>F01_transcript_100137
ATGGTGGCATCATCATCATTATTCTCACAGGAATACTTGGAAAGCAATCTAGTGATGGAAACTAAGAACCTGATATCGGAGTTGTGCCGTCAATTCTATAATCTGGGATGGGTATCCGGTACAGGTGGGAGCATCACCATTAAAGTATACGATGACTCAATCCCCAAACCCCAACAACTCATCCTCATGTCCCCTTCTGGTGTGCAAAAGGAAAGAATGGTTCCAGAGGATATGTACGTGCTATCTCCAAATGGGTCCATTCTCTTTTCGCCTGTGCCCAAGCCATATCCTCATAAGCCTCCTAAATGTTCTGACTGCGCTCCTCTGTTCTTGAAGGCATATGAGATGCGTAATGCTGGTGCAGTTATCCACAGTCATGGAATGGAATCCTGTATTGTG…
>F01_transcript_100138
ATGAGAGTGGATGATTGTAGGTTTGAGAATGTTGTTATAGCTGTTGAGAAAGCAGGACAAATTGATCCCCAAAGCATTGAGGTATCAGTTTTGCTCAACAATGTCAAAGCGGTGGCGAGAGCTCGTGCTCGCGGGAATGAGAATGATCTTTACAAGTCTGAAAGGTTCACCGAAGCTTGCGCGGCTTATGGGGAAGGTCTCAGGCTTAATCCTTCCAGCTCAGTTCTTTACTGCAACAGAGCTGCTTGTTGGTATAAGCTTGGGAAATGGGAGCGATCTCTTGATGATTGCAACCAAGCTTTTCATATCCAACCAAATTACACAAAAGCACTTCTGCGAAGGGCTGCTTCAAACAGCAAGCTTGAACGATGGGTTGAAGCTGTCAGTGATTATGAGGTG…
>F01_transcript_100139
ATGGTCCAAGAAAAACCCAAACCTAAGAGGCTTTACCAGGTTTGGAGGGGAAACAATAGATTTTTCTGTGGGGGAAGATTGATCTTTGGTCCCGATGTGGCATCTTTGTTTCTGTCGACACTCCTAATTGCAGGCCCTGCGATAGCATTTTGTATAAAAATTTACGTGGATAAAATCAGACACCACAAAGATGCCGGTCATTGGTATCCTATACTAGTTGTGGGATTTTTTCTCACTATTCTGGATATTACATTTCTCTTCATGACATCCAGTAGAGATCCTGGAATAGTGCCTAGAAGCTCTAATCCTCCTGAGTCGGATGATGCCTATGATATAAATACCCCTTCTATGGAGTGGGTCAACGGTAGAACTCCTCATTTGAAATTACCTCGAACAAAG…
>F01_transcript_100148
ATGATATATACATTTTCAGATGAACTTCAGGGAAAGAATTTGATGAAAAATGAAAGAAGACGCCAACTTGAATCTGTCACGGTGGACGGGATGGATATAATAACTGCAGCACAAGATGCTTCTCAGAAATCATTAGCTAAATTGGAAGCTAGAGATGCAGCAGCAAAAACAGCTACCAAAAAAAGGGGAAGAAAGAATCTCCGAGTTGAAAAAGACTAG
>F01_transcript_100149
ATGGCTGAATACGTGAGAAAGAGAAAGACTCATTCAAAGGTAAGATCAGGGTGTAAGACATGCAGAGCACGAAGGGTTAAATGCGACGAGGATAGGCCGTTCTGCGCTCGTTGTGTGAAAAGCAATCGTGTGTGCGCGGGTTATCCAGAACACGAATCCATCCCTGTCAAGAAAGTACCCGATGTTATTCGCATTGCACCTCTTGCCCCTAAAACCAAAGCCCTCAAGTCATTCCCAATCAACATATCATCATCCTCGGTCTCTCTGTCGCTCACGAAACCAGGAGGGTTATTCCGCAACGAAATGGAACACCAGTATTTCTCATTCTGGGTCACAGAATTCTTGCAGCTGAAATGCTCAACTACTTATCTGGCTGCATTTGAATCAGACTTGTGGTCT…
>F01_transcript_10015
ATGGGTAGCTCAGGATTTTCATGGAAATTGGCGGATCACCCAAAGCTCCCAAAGGGGAAGATCGTGGCTATGGTGGTTTTGGATGGGTGGGGTGAAGCCAAACCCAATCAGTATAACTGCATCTCTGTTGCCGATACACCCACTATGGATTCTCTGAAAAAGGGTGCACCTGAAAAATGGAGATTGGTGAGGGCTCATGGAACTGCAGTGGGACTTCCAACAGAAGATGACATGGGCAACAGTGAAGTTGGTCACAATGCCCTTGGTGCTGGACGGATATTTGCACAAGGTGCCAAGCTTTGTGACCTTGCTCTTGAGTCTGGAAAAATCTATGATGGTGAGGGTTTTAAGTGCATCAAGGAATCTTTTGAAAGTGGCACATTGCACCTCATTGGGTTA…
>F01_transcript_100150
ATGGCTGGGTTGGAGGAATTGAAAAAGAAGCTTGTTCCATTGTTTGATGCCGAAAAGGGCTTCTCGTCTGGGTCAACCTTGGACCCTTCTGATTCTTATATGTTATCAGATGGCGGAACTGTTAACTTATTAAGTCGATCTTATGGAGTATACAACATCAATGAGCTTGGATTGCAAAAGTGCACTTCACGGTCAGAGGATGACACGGACCTCGGTGAAAAGACGTATAGGTGTGCTTCCCATGAGATGAGGATTTTTGGAGCCATAGGTAGTGGTGCGAGCAGTGTGGTTCAGAGAGCCATCCATATACCGACTCATAGAATTATTGCCTTAAAGAAGATTAATATTTTTGAGAAGGAGAAAAGACAGCAACTTCTCACCGAGATAAGAACATTATGT…
>F01_transcript_100155
ATGTATATCCGTGACCTTAAAAACACAAAGGGCCACATATCTGGGTTGACTGGTGGGGAATGGCATCCTAAAGAAAAGGAGACTATTTTGACATCATCGGAAGATGGTTCATTACGTATATGGGATGTAAATGACTTCAAGAGTCAAAAGCAAGTCATTAAACCAAAACTTTCAAGGCCTGGAAGAGTTCCTGTTACAACATGTGCTTGGGATCGTGAAGGAAAGTGGATTGCAGGTGGCATTGGAGATGGATCTATACAGAGATGGAATTATAAATCTGGACGGGGGAAGCATGCCATATATACATGTTGTGGCAGGACACTCAGACGACATCACTTGTCTCAAGTTTTCTAG
>F01_transcript_100159
ATGGCTCTCAATGGCATCCTTCGCACTTCAGTCTCCCGCGTTGCACCTCTCGCCGCTCGATTGATCGGCGGTCAAAGGCATTTTTGTCGCCACCCCTCTGCTCTGTTCTCTGCTGCTGCCATTGTCACTCAAAGCAATCTCTCCGGCGAGCTCCTTCCCACTTCATTTACATCCGGCCGTCAGTATTCTTCATCACCCAAGCGGCCGAGTTCTGATGAGTCACTCCTCAAAGTCATTGAATCAGAAATTGTATGCGCGGAGGAGTCTGACGACTATAACGAGGTTCAGGAGGCTCCAGAAGGCTTCCCTTTCAAAATTGAAGATAACCGTGGCCAACAAACAATCTCTTTGTCCAGAGAGTACCAGGGCGAAACTATCAACGTTGAGGTTCACATGCCT…
>F01_transcript_10016
ATGGCCTTGCTAGTGGAGAAAACCGCCACCGGCCGTGAGTACAAGGTCAAGGACATGTCCTTGGCTGACTTCGGCCGGCTCGAACTCGAGCTGGCTGAGGTCGAAATGCCCGGACTCATGTCCTGTCGGACTGAGTTCGGACCTTCACAGCCGTTCAAGGGAGCGAAAATCACCGGATCCCTTCATATGACTATCCAGACCGGAGTTTTGATTGAAACCCTGACGGCACTCGGCGCGGAGGTGAGATGGTGCTCTTGCAACATCTTCTCCACCCAGGACCACGCCGCCGCTGCCATTGCTCGTGACAGCGCCGCCGTTTTTGCCTGGAAAGGAGAGACCCTTCAGGAGTACTGGTGGTGCACCGAGCGGGCTCTTGACTGGGGCCCTGGCGGCGGGCCG…
>F01_transcript_100161
ATGTGGAGTATAACCAGATTTTATGAGAAAGTTTATTCGATGGCAGAAGGAGGATCTCATTATTGTTCTAAGAAGACGGATGATATTTGTGGAGATGCTTGCGATGAGGACTCTGTTCATGTTTTGAGCATGTCGAGACTGCGTTGTATTATGCGTGGACTGGATTTGAAAACATACATCTTCCTATTTATTTTGGTTCCAACCTGCGTCTTTGGTTTATATATGCATGGTCAGAAAATATCATACTTCTTGAGGCCATTATGGGAAGCGCCACCTAAACCTTTCCATGAAATTCCTCACTATTATCATGAGAATGTATCAATGGAGAATCTATGCAAACTTCATGGTTGGGGGACTCGTGAATTCCCAAGACGTGTTTTTGATGCAGTGTTATTTAGT…
>F01_transcript_100164
ATGCCCTGCTTCTTTCTCTATCTTCTCTTCATTTTCTCTCTCATCCATCGCTCCATATCTCAACCCCCCAAAGGTATACTAATTGACTGCGGCGCCACCGTCCGATCAGTGATCGACGACCGAGAATGGGTTCCCGACACCGATTACATCTCCACTGGGACCCCCAAAAACCTAACCACTACGAATCTTGTGCAAATCCTGTCCACCGTCCGATCATTTCCTCTGGCCGGCAATACTCGCCGGAAGTTCTGCTACGATGTGCCGGTGTATCGCACAGGAAAGTACCTGATTCGGACTACCTACTTTTACGGTGGAATTAATGGTAACGAATCGCCGCCCGTGTTTGACCAAATTGTTGATGGGACTTTCTGGAGTGTGGTGAATACAACTGATGATTAT…
>F01_transcript_100165
ATGCCCCATGAATCAACGTCCGAACCAGACCCGGACGATTTTGAAGCTGAGTTCGTTGAGGTCGATCCTTCTGGTCGATATGGTCGGTATAAAGAGGTTCTAGGAAAGGGGGCTTTCAAAAAAGTATATAGAGCTTTTGATGAATTGGAAGGAATTGAAGTAGCTTGGAATCAAGTTAAGGTTGCTGATCTTTTAAGAAATTCCGTAGACTTGGAGCGTCTGTACTCCGAAGTTCATTTGCTTAAAACCCTCAAGCACAAGAACATTATCAAGTTTTACAACTCTTGGGTTGATACCAAAACTGAGAACATCAACTTTATCACTGAGATTTTCACGTCTGGGACTCTACGCCAATATCGAAAAAAACATAAGCATGTTGATTTAAGAGCATTGAAGAAA…
>F01_transcript_100167
ATGGTTGCTCAGCCCTGGATTCCATATATTTGCAGTGAGAACATCAAGGAGGATGGAGGATATTTCCAATATGGCTTTGTTTTGTTTCCATTCAATAGTTGTTATCTTTCTTTTCTCCTACTTAAGGTTCAGACTAATGTTTCTGGATAA
>F01_transcript_10017
ATGGCAATGGCGATGGCGCTACGAAGGCTCTACTCTTCTTCTTCTTCCTTATTGAATCCTCTTCGTATTCTATCTCATCCCGCTACCTCACATTATTACATGTCTTCTTTGCCGAATCAAGCTATTCGTGATAGAGAAGATTCTCGTGTTACTTGGACGAAGCAATTGAATGCTCCACTTGAAGAGATCGATCCTGAAATTGCTGACATCATTGAACTCGAGAAGGCCAGGCAATGGAAGGGACTTGAACTCATTCCTTCGGAGAATTTTACATCTTTGTCAGTTATGCAAGCGGTTGGCTCAGTAATGACTAACAAATACAGTGAAGGGTATCCTGGGGCAAGATACTATGGAGGAAATGAGTACATCGACATGGCTGAGAGACTGTGTCAGAAGCGT…
>F01_transcript_100170
ATGACCAAAATGTCATCCGGGGGTTTAAATGAAGAATTAACGAAGAAGACATCATTTTTGGGCATGAAACTATGGGTTGTCATTGGCATATGCGTCGGTGCATTTATAGTGTTGATTCTTTGTATCTTATCTATGTGGGTCACATGTCTGAAAAAATCTAAAAGAACCCGAAACAAGTACAACATTTCTCAAATACCTTTTGTCTCAAAAGATATCAAGGTTGACAGAGAAGGGGGTCAAAATTTCAATGATCATCCAGGAAGTTTAGTTGTTACAGTTAATGATAAATCAAGCAATAAGAATTCCGAGAAGATGTTTGTACACCTAGGTATGAGTAAATCCAGTGTCGCTGATAACATCAGCCAGTGCATCTCAACGTATTCACATTCAGGTGAAGAA…
>F01_transcript_100171
ATGGCAAGCAATGAAGTTCAGGATGAGTTGGTAAAGTCACTTCTCATACTCTGCAACAATGAAGGCACATTATGGCATGCCCTTCAGGGCCGTGAGGGAATTCAGCTGTTGATATCTCTTCTTGGACTTTCATCTGAGCAACAACAGGAGTGTGCTGTTGCATTACTTTCCCTTCTATCTAATGAGAATGATGAAAGTAAATGGGCAATCACAGCTGCTGGTGGCATTCCTCCACTTGTTCAAATTTTAGAGACAGGATCTCCAAAAGCAAAGGAAGATTCTGCAACAATCCTCGGAAACCTCTGTAATCACAGTGAAGATATAAGAGCATGTGTTGAAAGTGCTGATGCTGTTCCTGCTTTACTATGGCTATTAAAGAATGGGAGTTCGAATGGCAAA…
>F01_transcript_100172
ATGGCTGCCATGGACAAGTTGCTGCAATTCCAAGATTCTGTTCCCTGTAAGATTCGTGCAAAGCGAGGTTGTGCTACTCATCCACGAAGCATTGCAGAGAGGGTGAGAAGAACTCGAATCAGTGAACGAATGAGAAAAACTACAAGAGCTTGTCCCCCACATGGACAAGCAAACAAACACTGCAGACATGTTAGATTTGGCTGTGGAGTACATTAA
>F01_transcript_100174
ATGGTTGCTGAAAACAGTTTCGACATGGACGAGGGAACACTGGAGATTGGCATGGAGTATAGGACAGTCTCTGGAGTTGCTGGACCGCTGGTTATTCTTGATAAAGTTAAGGGACCCAGGTTTCAAGAGATCGTCAACATTCGATTAGGAGATGGAACAACTCGACGAGGTCAAGTCCTAGAAGTTGATGGGGAAAAAGCTGTTGTTCAGGTTTTTGAAGGAACGTCTGGAATTGACAACAAATACACAACTGTGCAGTTTACAGGGGAGGTTTTAAAAACTCCCGTCTCAATGGATATGCTTGGGCGCATATTTAATGGTTCTGGAAAACCAATTGATAATGGTCCTCCTATTTTGCCAGAGGCTTATTTGGATATTTCCGGAAGTTCTATCAATCCT…
>F01_transcript_100176
ATGACAAGGTGGTTGCGGGGGCCATGGTGGAGGATGGTGTTGATAATCCTCCTCGTCGTCGTTGTGTCGATGATGATAGAACCGGCAATATCAGACCCCCAAACTAATCTGCTAAACGACGCGTGCAGCCAGTACAACTCTACAGACGTGTCGGATTTCTTCAGCTATCGCAACACCACCTTTGCCAACCTCAGAAGAAAGTTATCTGACAAAAACAACACTACACACTTTGCCACCGCACAAGAATCGGGTATCTATGCCATGGCTCAGTGCAGGAACTACCTCTCCTATGCAGACTGTTTGGCTTGCTTTGATGCTGCCGTCTCTCTCACACAGAGCTGCTCCGCTGACGGTGGTGCTCGTGTCATATACGAAGGTTGCTTCCTCAGGTATGAGGCC…
>F01_transcript_100177
ATGGTTGTTCCGGAAGTTAACCAGGAGCTGCTCGAGAATCTTGAGTCGATGGGTTTCTCAAAAGAGAGGGCAACCCGGGCACTTCATTACTCTGGTGAGTGCATAGATAATTACAAACCTGGTGTTTTATTAGCAGAGTGCTTGAGTTGA
>F01_transcript_100180
ATGAGTTGCATGCCTTGGACAGATTTGAACAAGATTATCGGCGTAAGCTTCAAGAAGAGGATAACTCTAGTGCTTCTCAAAGAGGTAATGGAGAAACTTGTAGACATTGTTCATTTCTTACATATGGAGATCTATGATGCTTTTGGCAGTGCTGATGGAGATAGACCAGCAAAAAACAACCATCAGAAATTGGGATCGGCTGGCCTTGCATTGCATTATGCAAATATCGTTACTCAAATCGACACATTAGTGACCAGATCAAGTGCTGTGCCTCCAAATACAAGGGATGCTTTATATCATGGATTACCGCCTAGTACCAAGTCTGCCTTGCGCTCAAAATTACAGTCATTTAACCTTAAGGAAGAGCTCAGTGTCCCACAAATCAGAGCTGAAATGGAA…
>F01_transcript_100182
ATGTTAGTTACATCTTACTCTTATTCGATTAAAACAGGTAGTTATCTGAAGGGTATGAAACCGGAGACGACTTCATCTTCTGGTGCTACTAATGTGAATATCCCAGAGGCCTCAGACACTGTTGCCAATGCATCCAGTAGTAGAGTGGATGCAATTGGGAAATCTGTCAAGCATGAACCTGCCAGTGGAGTAGAGAACGAATCTATTTCTAAACTTGATTTTTCTACCTTGGACTCTGATGATAGTGCTAATTTTGAGAGGCAGAAAAACAATCCTGTCAATCCTCATTCTTCGGGAGGTGATACAGACAGAGAAAACTTGATGGGGGCTGAAGCTAATAATGCAGAAGTTCAGCCAGCTTCACAATCTCAAATTATTGCACATGGTAACCACCTATTA…
>F01_transcript_100186
ATGGCGGGTAGAGGAGGAGGGTATGGGGACCAGAAGATTGACTACGTGTTCAAGGTCGTGCTCATCGGAGACTCGGCCGTCGGGAAGTCACAGTTACTGGCGCGTTACTCCAGGAACGATTTCAGCTTGGATTCTAAAGCTACAATTGGTGTCGAATTTCAGGCTCGAATTCTATTGATTCAGAACAAATCTGTCAAAGCTCAGATCTGGGACACCGCTGGACAAGAACGATATAGAGCGGTCACTAGTGCATATTATAGAGGAGCTGTTGGGGCTATGTTGGTTTATGACATTACCAAACGACAGACCTTCGATCACATACCTCGTTGGCTCGAAGAGTTGCGTGGTCATGCTGACAAGAACATTGTTATTATTCTGATTGGAAACAAAAGTGATCTT…
>F01_transcript_10019
ATGGGAGCTTGTGGATCGAAACCGAGAGGCTGTGGAATGGGTATTCGAAGGAATAATAGAAGCCGTAGAAGAGTAACAAAGACACCCTCTTTATCTCACACGCTCAATAAAGTGGATCCTTCTTCTGTTTCAATTGATCGTAATTACTGCAATCCTGCATATCAAGGAAATTCAGAATTATGGTTCGATCCTGTGATGGTGCTCGACTCTGATGGAGATGATGATTTTTATAGCATTCAAGATGATGTATCTCAAAATGGCTCTGTGTCAACTGTTGTAACTCCAAGAGGTTCCAATTACGTAAATCATAATGGCAGTGTTCCATCCTTTGCTACCTCGGATCCCCTAAGACAACCAAGTACAGAATCAGAAGAAAATTCAGAATATAGCTTGGTCAGA…
>F01_transcript_100194
ATGATGTGGGCTCTGGAATATGACCCAGATTTGTGCTCTGTGTATGAGGACGACTCTGACGCACCTACTGAAAAATCTGATGGATCTAAAGCAAAGGCAAAATCAACACGCCAATGTGGCAAGTATGAAAGGGAAAAAATGAAAAGTGGAGGTAAAGGTGTTGAAGCTGCACTCCCTATTTCTGTTTTCTTAGTAGCTAGTGTCCTGAAGGACAAGAGCTCAAAATTACTAGCAGAAGCTCGTGGATTGGATGATGTTGTCAAGATATTGAACGACATGACAGGAAATCTAGATGCCAAAAAAGCTTGCACTGGAGCATTGAAACTACACAAAAAGTATCTAAAAAAGGTACAATTATTTTTTGGTGTTTTGTAA
>F01_transcript_1002
ATGGCATCAACAGCTGGAGCCACAGGATGGTTGAGAGGAAAAGTGAAAGCTGTTCCATCTGGGGACAGTTTGGTGATAATAGGGAGCACGAAGGCTGAGATTCCTCCTGAGAAAACCATAACTTTAGCATCTCTTATTGCTCCAAGATTGGCTCGCAGAGATGGTGTTGATGAGCCATTTGCATGGGAGAGCAGAGAGTATCTAAGGAAGCTTTGCATAGGAAAGGAGGTTACTTTCAAAGTGGATTATGCTGTACCATCAATAGGGCGAGAGTTTGGCACTGTTTTCATTGGTGATAAGAATGTTGCATGTTTGGTCGTTGCTTGTGGCTGGGCAAAGGTTAGGGAGCAGGGTCAACAACAAAAAGAGAAAAGTGATGCTAGTCCTTTCTTAGCAGAG…
>F01_transcript_10020
ATGTCGGACAGTCATGAAACTGATAAGAACATTGAGATATGGAAGATCAAAAAGCTTATCAAGGCTCTTGAAGCTGCTCGAGGAAATGGAACCAGCATGATTTCTCTAATTATGCCTCCTCGTGATCAAATATCTCGAGTTACAAAGATGCTGGGGGATGAATTTGGAACTGCTTCAAACATAAAAAGCAGGGTAAATCGTCAATCAGTTTTAGGTGCAATTACATCTGCTCAGCAGAGACTGAAGCTCTACAATAAGGTTCCTCCAAATGGACTTGTGCTTTACACTGGAACCATTGTAACTGACGATGGGAAGGAAAAGAAGGTTACAATTGACTTTGAGCCCTTCAGGCCCATAAATGCATCTCTTTATCTTTGTGATAACAAGTTCCATACAGAA…
>F01_transcript_100203
ATGGATGGTAAAAACACCAGGCTTTCTTACCCCTTGGAGAAATTTCATTCGGATGTAGCTGGAAGAAGCTTTCATAACGGGCGTTTTGTTCAACGAATGAGGGAGAAAGCTGCATCACTTCCAAATGTAAGAATGGAACAGGGGACAGTTACATCTCTGGTTGAGAAAAAGGGAAGTGTAAAAGGGGTGCAATACAAAACCAAGGATGGCCAAGAATTGTCTGCATTTGCTCCACTTACAATTGTTTGTGATGGTTGTTTTTCGAATCTCCGTCGCTCCCTCTGCAATCCCAAGGTGGAGGTGCCTTCGTGTTTTGTTGGTTTGATTTTGGAAAATATTGATCTTCCACATATAAACCATGGCCATGTCATTCTAGCAGATCCTTCTCCAATCTTGTTT…
>F01_transcript_100204
ATGCAAAGTTTGATTTTGGGGTCCAAGTATTTGAAAGTTGCACAACAGATTTTGGATGAAGTTGTTAGTGTTGGAGATCATGTAGTTAAGGCTGAGGAAATGAAAGAGATGTTGAAGGTTGATAATAATAATAATAATAATAATAGTAATAAAGAATCAATGACTGTTAGTCCAGGTGAAGGTTCGACCGGAGGGAAGCACCGGAGTGAGCTTACAACGGCTGAGAAACAAGAGTTTCAGATGAAGAAGGCTAAGCTTGTTAGCATGCTTGATGAGGTGGAGCAACGATACAGACAGTACCATCAGCAAATGCAAATAGTTGTGACTTCATTTGAGCAAGCTGCAGGACTGGGGTCTGCTAAATCATACACTGCTCTTGCCTTACAAACAATCTCAAAG…
>F01_transcript_100205
ATGGCTGTTCTCAATGGTCGAATTCTCCGAATTGGCGATTATTCTTCTGTTCAGGGTCTTGCTGGATACAGGACTGAACATTTGAATCTAGAAGGAAAACTTATTGTTCCTGGATTTATCGACTCCCATGTGCACTTGCTCTTTGGAGGACTGCAGATGGTGCGGGTTGAACTCCGAGGCATTAATACAAAAGAAAAGTTTGTTGAAAAAGTCAAAGCAGCAGCAACAAATATGAAGCATGGTTCTTGGATATTGGGTGGTGGATGGAACAATGATATTTGGGGAGGAGAATTGCCAATGGCTTCTTGGATTGATGATATTACAGATCAGAACCCTGTGTGGTTATCAAGGATGGATGGTCACATGGGATTGGCAAACACATTGGCACTAAAAATTGTT…
>F01_transcript_100207
ATGACTGCTCCTATGTATATAGCAGAAGCTTCCCCATCAGAAACAAGGGGTGGTCTTGTGAGCACTAATGTGTTTATGATTACCGGTGGACAATTTCTTTCCTACCTCATAAATCTTGCTTTTACAGAGGAAGACTGCTTCTATGACCTGCCTTACAATAATGGGTATCAAATTTTTGTGCTACGTTTACGGAAGACAAGGGACGAAATTATGAAGTGTACTTTCTCTATATATGTAGATATATACTTTGATTGA
>F01_transcript_100208
ATGAATCGGCTAACCAGTGCTCCTCACCTCATGATAGTTTCTGATCTTGACCATACAATGGTTGATCATCATGATCCTGAAAATCTTTCTTTGCTAAGGTTTAATGCCCTATGGGAAGCCAAATATCGTGTTGATTCTTTGCTAGTGTTCTCAACAGGAAGGTCACTTACTTTGTACAAGCAGTTGAGGAAAGAGAAGCCCATGTTAACCCCTGATATTGCTATAATGTCTGTGGGAACTGAAATAACATATGGGAATTCTATGGTGCCAGATGATGGTTGGGTTGAAATTTTAAATCAGAAATGGAATAAGAGCATAGTCTTAGAGGAAACAAGCAAGTATCCTGAACTTACTCTTCAGTCCGAAACTGAGCAACGGCCGCATAAGGTTAGCTTTAAT…
>F01_transcript_100209
ATGGAGGAGAATAATACTAATAACAATAACAGTAAGAATGAGAAGAAGAAAGAAGTGATTCGATTAGAGCGGGAATCCGTAATTCCAATTCTCAAGCCCAGGCTCATCATGACCTTGGCTAACCTCATTGAACATAGTTCTGACAGGGCTGAATTTTTGAAGCTCTGCAAGAGAGTTGAATACACAATTCGAGCTTGGTACCTTCTACAATTCGAGGATCTAATGCAACTGTACTCCCTCTTTGATCCTGTCCATGGGGCTCAGAAATTGGAGCAACAGCACCTATCTCCAGACGAGGTCGATGTTCTTGAACAGAATTTCATGACCTACTTATTTCAGGTAATGGATAAGAGCAACTTCAAGATAGCTACAGATGAAGAGATTGATGTTGCACATTGT…
>F01_transcript_100210
ATGGCATTTGCTGCTGTTACTTCCTCTACTGCCATTACCAGTTCTTTTCCTTCACGTTCAAATCCCTCATTTGAACAATCCAAAGCTCCTCAGCTGGGATCATTTCAGCCGTTTGAACGGTCTCATGCTTCGTCAATGGCTCTGAATCTTTCTCGGAGCAGGTCGCAGGTGAAACCAATCAATGCTAAGCCAGAACGGAACGATTCAATTGTCCCTTCTGCTGCAACCATCGTTGCTCCTGAAGAGGTTGAAAAAGTTGAAGTAGATGTGGAGGACTATCAGAAGCTGGCTAGGGAGCTTGAAAATGCATCCCCACTTGAGATTATAGATAAGGCTCTTGAGAAATTTGGGAATGATATTGCAATCGCTTTCAGTGGTGCAGAAGATGTTGCTTTAATC…
>F01_transcript_100211
ATGAGTTTGTTTGTTGTTCAAGTGTATTCTTCTACCCTCTTCACTACTACCTCTATGTCCAAGTCCACAATTCCTAATAGTCAATATTATAGTGAGAACATCGGAGCTCTTTCACTTCAATTGATGGGTAGCACTGCCACTAGAAAACAGCTTGGGGCGGGAACTAGGATTAAAATAATGATGAGAGACAGGAGCAAGAATCGAAAGCCCCTGCAGAAGGGGAGAAACCTCAGCATCGAAGCCATTCAAACGGTTCAAGCTCTGAAACGAGCCAAGGGTGAGGAGGATTCTGTCCGTCAAGTTTTCGCTTCCAATTTCAGTCGGTTACTAAGGCTTGATATGCTAGCTGTTCTCCGGGAACTCCTCCGTCAGAACCAATGCCTTTTGGCCATTAAGGCT…
>F01_transcript_100215
ATGGTTATGATGGTCAAGGCCCCCGAACATTCAAGTGCACGATTGGAGCGATTCCTTCAGATGAGTGATGACCACCCTTATGCTATACCGGAGATGGATCCCACACTTCGGAAGCAGATCCAGGAATGCAATTGGCAGGTTGTGAACGTCACTACGCCTGCAAATTATTTCCACGTCCTGAGACGTCAAATACACAGGGAATTCCGTAAGCCTCTTATTGTAATGGCTCCAAAGAACTTGCTTCGTCACAAGGAGTGCAAGTCAAATCTATCAGAGTTTGATGATGTCCAAGGTCACCCAGGTTTTGACAAACAAGGAACCCGATTCAAGCGCCTCATAAAAGACCAGAATGACCACTCAGATCTTGAGGAGAATATCAGACGTCTGGTTCTTTGCTCC…
>F01_transcript_100216
ATGGAGAGGATACGATCTCATAATCGCCCTTGTTACACTGAAGAAATAGTGCCTAGAAGGTGTGGCTCTCCTCCCTATGGGGCACAGTCTTCCAGTCTTTTAACGAATATGGATTCTGAAAGGATAGGTCATCCGAGGTCTGCTAATCCTAATAAGAGGAGGCCATTTGACAGGGTGTTACCTAGAAATACTAGGAGATTTGATTTTATTGATCCTCGAGAAAGGACAGATAACGATGAATATGTCAGAGGGCCAATTCGCCCTGGTAGATTTAATGAGCTAGGTGGTGATGGAAGGGTTGATGAGAGAAGAAAGTGTGGTGATAGGCGTGGACTTGTTTGTTCTTTTAGACCACCTTTTAATGGTGCTGATGGCGAAAATTTGCATTTTCATCCTGAC…
>F01_transcript_10022
ATGTACATAAATTATTTTTTATTTTTTGACTTGTTTATCCGTCCTAACACCAACAAAAAATTCTGCAATGACTTGCATTTTTTTAGTTTGCTGACAAGCTCTGTATATCATCTTTTTCTCTGTAGACATTTTACAAAGTGGTTAGGAGCTGGGCCTCAAAAAAGTTCATTACTGGATGGCCTGGGCTTTGTAACTTCCATCACTTTCATATTCTTGGTTGGGGTGTTCATGTCATCATGGTTGGGCGCATCTGTTTTGAGCCTTGGGGAATGGTTCATCAAGCGGATGCCATTTGTTCTTCACATTTACAATGCCTCCAAACAAATTAGTTCCGCCATATCTCCAGATCAGAACACACAAGCATTTAAGGAAGTGGCTATAATAACGCATCCACGAATT…
>F01_transcript_100220
ATGAAGAATAGGTCTGAAAATGGCCCTAATGAAAACTGGAAGAAAATGAACGGCCCTGAATCAATCAATCAGAAGACGATGAAGAAGAACAGGATGAGAATGGGAGGAAAAGGGTTCTCCCTTGAAGCCTTCACTAATGCTAAGACAAAGAGCGACCATTACAATCCTGCTCTCATCATACAACCCTCAAAACTTTTGGATGGATCCTCTAAATTTGTGCTCACTTACGAAGATAAAGAAGGAGACTGGATGCTCGTTGGAGATGTTCCATGGGGGATGTTCCTCAACACCGCGAAAAGGCTTAGAATTATGAAGACCTCTGATTCTAATGGACTTGTTCCAAGGTTCCGAGAAAGACATGACAGACAAAAGTCTATGCCCATTTAG
>F01_transcript_100221
ATGTATGTATCTCCAAAGTCGAATATGAGAAGTTTAGAAGTAATTGCAGAGTCACCATTTTCAGTGATTGCGGACGTAGCAGTTGATAAAGGGAATCATGGTGGGAATTTGTACGGATGGCTGTTTAATTGCCACGGGTTTTGGCACAATATTGGTCTGATTGCGCCTTCGGCTCTTTTCGTGCTGTACTTGGCGTTTCAGGCGAAGAAGAGCTTTGTGAAGCTTTCGAGTGGCCGATCCTATATCATAATTGCCTATTATTGGTTTCTTTGGCTCGTTAGTCTTCTCAATCTTGCTTGGTGCTTGCTTCAGGCATGGGAATGTACTCCTGGGAGAGAAGCACCATGGAATATCCTATCACTGTTTACGACATCTGGAATGCTCTTTCTTGAAATAAGC…
>F01_transcript_100224
ATGAATCCAGAGTATGACTATCTGTTCAAGCTTTTGCTTATTGGAGATTCTGGTGTGGGGAAATCATGTCTCCTCCTGAGATTTGCTGATGACTCGTACTTGGAAAGTTACATTAGCACCATTGGAGTGGATTTTAAAATACGCACTGTTGAGCAAGATGGGAAAACGATTAAGCTTCAAATTTGGGATACTGCAGGGCAAGAACGTTTTAGAACAATCACTAGCAGCTACTACCGTGGGGCACATGGTATAATAGTCGTTTATGATGTAACAGATGAAGAGAGCTTCAATAACGTCAAGCAGTGGCTGAGTGAAATTGATCGCTATGCGAGCGAGAATGTCAACAAACTTCTTGTTGGGAACAAGTGCGATCTCACTGCCAATAAAGTTGTGTCATAT…
>F01_transcript_100227
ATGTATGTTAGAGAAGATAGAAAATTACTGCCTTTTGACTTGGAACTTATCAAAAGTATTTTGAATGAATGCATGCCTTACAATTTGGCTTACTTTCTGTTATCCTCTTTTGAATTATGTTATCACAATAACTGTCTGGGTTTTGGTTTTCTGCTTACTCACATCTTTAACTACTTAGAAATAAATGTCACACAACATCAATCTCAATTGGTTCCAACTAACAACAATGTCTCCCATCTTAATCTTCCACCTCAATCTTTGATAGTCTTTAAACCTTTTGATCATGAGGTCATAGAGTCTAACATCAATATGGCCACCAAAATAGACTATCTTAACAGTCTGAATCAAATTCTTCTACAAAACCAAAATCTCATGCTAAAAAAGTTGGAAGATATGCAA…
>F01_transcript_100228
ATGTCGGTAGGGTCGGAATTGGTTGTAATTGGGTCTCAGTTGAAGCACTGGATTTCATTTGCTTGTGTTTTTCTCTCTATTTGCATTCAACTGCAGCTCTTTTGCCTTAACCTTTGTCCGAAGGTTTCGATGCGTTTGAGGTCCAAAAGTTTTCTGGGTACTGGGTATCTTTTGAGTGGGAAAAAAATGCCAGAGCCTCACAGACAAAACCAACTGAATCAAGACAACCTCGGCAAGAAATCGAGGAACAAACCAAATTCTGCTGATGAATCCATCAAAATCATGAGAAAAATCCGCATAATCTGTTACGATCCTGATATGACCGATTCATCTGATGATGAGGGAAGCAACAACATGAGGAAAAGGCCATATGGGGCAAAGCGAATTGTGACAGAGATT…
>F01_transcript_100233
ATGTTGCAACAAACAAAAAAGAGTGGGGTGCGGGCTAATTTTAAGAGAGAACATGATAAAAAGATTTGCTGCTTGGGTTTAACGTCACTACTTCCGCTTCCTGTGGATCAGTTGCCAGGGGAGGCCTTGGAGCGTGTTTTCAAGTCCACTCTTGATTTGCTGGTGGCTTACAAGGATCAAATAGCAGAAGCTGCAAAGGAAGAAGTGGCCGAGGATTTTGATGATATGGACGGTTTGCAGTGTGATGATGAGGATGATGATGCCGATGGATCCGACAAAAAAATGGGAGTTGATGCTGAGGATGGCGATGAAGCAAATAACACAAAACTTCAAAAATTAGCTGCTCAGGATGGTATTCGTGGAGAGGTGCAGACGATGAGCTTGATTAATCATCCAAAT…
>F01_transcript_100234
ATGGCATGCACACTGAAATCTCCCCCTGTAGATTCACCTCATTCTCTGTTGTGGCAAAGATGCAATGATATGTGGCAGGATTTTGCTGAATCATTTGAAGTGAACAAGAAAACTGTACTGCCAAAGATGATCGTATGGGATGGAAATGAGAAATATTTTTCAGAGGAAAGGTTACCTTATGCATTCTATATATCAGATCAAGAGCTTGTTGTCCAACTTGGCTCATATTTACAGAAAAACAAGGGTTAG
>F01_transcript_100235
ATGGAGACCAGTTCTGTTATTGTCGCTTCACTTAAACACAGTGTGCTAACGTGCACCGGGGAGACTTTGTTGGCCATGTTTGTTGCGGTTCTGGACAATAATACCCAACTTTCAGCTTTAAGTCAGGAAATTTTTGGAATTCAAAACCAAAACCCTAGAACCAAAGGTGATCATCACATACCATCCACCTCAAAACAACTGGATGCTGAGGGAGACGATGATAATGATGAAGATGAAGACGACGAGGAGGGTGATGATGGGTTAGGCGAAGAAGACCCATCATCAGAAGATGGAGAAGATTTTGGCAACAACCCTAACAATAACAAGAACAACTCGAATAAAGGTCCGGGAGGAGGCACCGATGGCCCACAAGAGAACGGCGAAGAAGAGGAAGATGAT…
>F01_transcript_100241
ATGTTCAACATTGCATCCAGGAGCGCCAATGGTCCTCCATGTGGTACAAGGGTTGTAGCAGGGCGCATTGTGAAAGAAAGCTATGGTGCTGCCAAGCAACAGCATACATTTACGATTGAAGTTTTATGGAGCAAAGGTGAGAAACCACTCCCATCCCTTCATCCCCTTCTCATCAAGGGCAGAAACCTTTACAAGTTAAAGACAATGAGACAGAGGTGGCAAGATGAAAGGAAGAGGCAGAAGATTTTGTTAGAAAAGCATACTAGAGGATCTGTTGCCCGGTTGAATAGGGACACACGGATTCAAGAAAAGGAAATGAGAAAGACGCTAAAAGCAAATAGGGTGAAAACAGAATATCAGAGCCAAAAAATGAGAGAGAATACATCAAAGACATTATTA…
>F01_transcript_100242
ATGGGCTGTGAGTGCTCTAAGCTCACCTGTTGCTGGGAGCCAGAACACAATGGGCCAGTTTCAGAGGCTAATAATGCTGAAAATGAGAATGCAGGTGAAGACAGTGATTTGCCAACATTTCGCGAGTACACTGTAGAACAACTAAGGATATCTACATCCGGCTTTGCGGTGGAGAACATAGTCTCTGAACATGGGGAAAAAGCCCCAAATGTGGTTTATAAAGGGAAGTTGGAGAATCAAAGGCGGGTTGCGGTCAAACGCTTTAATAGATCTGCTTGGCCTGATCGCCAGCAGTTTCTTGAAGAGGCCAGAGCTGTCGGTCAACTCAGAAACCATAGATTGGCGAATCTACTTGGTTGCTGTTGTGAAGGTGATGAGAGACTACTTGTCGCGGAATTT…
>F01_transcript_100245
ATGGAGACGATTATTGTTATTGGTCAGCATAGGAATCAATACTATGGCAAAAAGAGGAATCATGGGTCGCCCCCTTCTAGAGATTTCAGAGAGAGAAATTGTAGAACTTTTCAATCTGGAGCAGGGATACTTCCAAACCCATTTAAGGCTTGCATTACACCTGTGACCAAACGGGGGTTTGGGTTTTCGCCCTCTTCCTCTTTTTCAAAAACACCATTGTCACCATCTGTTAATTCTCTCTCTGAAGAAAAAAACAACCAACACTTGAAAAAAGCTACCTTGAAGAAAAGTAGTTCAGTTCCAATTCCTATTAACATCAAAGTTGATTCTGATAAGGAGAGGTCCTTGTTTTCTGATGAATTTTCTTATCCTGAGCTTTGGGCTGGACCTGCTTATTCG…
>F01_transcript_100249
ATGCTAATGCATGAATGCCTATGTATACGTGCATCCTTGCTTCTCAAGCGGAACTGGAAAAACGATGCTCATATAGCTATAAGAGATTGTCAGAGGGCTAGGAAGATTGATTCTTCTTCGTTTAGGGCTCTCCACTGTATCTCTGAAGCTTTGTCTCGGTTGGGAAAACATAAAGAAGCTCTAGACTTTGCTATTGCGGCTCAATCATTGGCTCCATCTGATTGTGAAATTTCAGGAACAGTGGAGTGTATACGAGCGGAGCTCGCTGCAGCTAATTCTGATAAACATAACAAGTTGAGTGATGGAGCACCTAGATCTGACCCTCAAGCAGGAAGGGTACTATCATTGAATGATATCCTATACCTATCAGAAGCAAATAGTAATGCTTCACAAGATGGT…
>F01_transcript_100250
ATGTATTCTGCATTTGATATGATGGGTGAAGCAAGGTGTGATGTTTATAGTTTTGGTGTCATACTGTGGGAGCTTGCAACTCTGAGATTGCCTTGGAATGGAATGAATCCAATGCAAGTCGTGGGAGCAGTAGGTTTCCAAAATCGTCGCCTTGACATCCCCAATAATCTTGATCCATTGGTTGCAAGGATAATTTAG
>F01_transcript_100253
ATGGCAGCTGCTGCCATGAGTTTAAGCTTAGTTGGAGCATTTAAAGGACTTTCGTTAGGTTCAAGCTCATCTTCTTCTTGCTTTAAAGGGGACTTTGGATCGATTCACGTTGGCCACAAAGTTTCAGTTTCGTTTCCGTTGCAATGTCCGCTGACGATTGAGAAAATGGCCGAGATTCTGCTGGTAGAAGGCTTGGAGTCAAGATTTATGGTGATCAAGTCGCCAAGCCTGGTGCCATTATCGTTCGCCAGCGCGGAACCAAGTTCCATCAGGGAAGAATGTTGGTCTTGGCAAAGACCACACCATCTTCTCTTTGATTGA
>F01_transcript_100257
ATGTTTCATGTGGCAGCTGCAAACCAAAAAAGAATGATGTGTCTAGTGATGATTTCTGATGATAGCAGGAGCTCAGATGATGATAAGTCCTGCCAAAGTGGGCCCTCCCAAGCAAAAGAAAATCAACTGCCATTGCGGGCTAAAAAATGGAATTTGTTTGTTTGTGACAAAAAAAATAAAGATGAGTCAGGTGATAGTTTTTAG
>F01_transcript_100259
ATGTCTCAAGTAAGCATCAACGACAATGAGGTGGATATTGTGATTGGTGCACTGAACCATGACCTTACATCCTTCATGGATGAGTGGAAATCGGTCTTCTCCCGCTTCCACCTGATCATTGTCAAAGATCCTGATCTCAAAGAGGAACTTAAAATTCCAGCAGGCTTTGATGTGCAAGTCTATACGAAGTCCGATATAGACAAAGTTGTTGGGTCTTCTTCCATTCTCTTTTCTGGTTACTCATGTCGTTACTTTGGGTATCTTGTTTCCAAGAAAAAATATATAATCTCAATTGATGATGATTGTGTCCCTGCTAAGGACGATAAGGGTCAATTAGTAGATGTTGTCACCCAACACGTCAACAATCTTTCAACTCCGGCCACTCCTTTCTTCTTTAAC…
>F01_transcript_100261
ATGGTCTTCAAGGCCATAGAGAATGGGTGGTTAGTAGATTATCTGCTCGTGGCAGAAGTAGACTTCCTTGGACAGCTTTATCATCCTAATCTTGTTAAGCTAGTTGGATACTGTATTGAAGATGATCAGAGACTGCTTGTTTATGAATTCATGACGCGCGGGAGTCTTGAAAACCATCTTTTTAGAAGAACCATACCTCTTCCCTGGTCCAACAGGATTAAAATTGCACTTGGCGCAGCCAAAGGCTTAGCCTTTCTCCATGGAGGCTCTGAACCTGTCATTTACAGAGACTTTAAGACATCAAATATCTTACTTGACACGGAATATAATGCAAAGCTTTCAGACTTCGGTCTAGCAAAAGCAGGTCCTCAAGGGGATAAAACTCATGTTTCTACCAGG…
>F01_transcript_100264
ATGTCTGAGCTTGACATCCAGGTCCCTACAACCTTCGATCCCTTTGCTGAGGCAAATGCTGAGGACTCGAGTGCTGGGTCAAAGGAATACGTGCATATTCGTATACAGCAGCGCAATGGTAGGAAAAGCCTGACAACTGTCCAAGGTTTGAAGAAAGAATTCAGCTATAGTAAGATTCTTAAGGACCTTAAGAAGGAGTTTTGCTGTAATGGTACTGTAGTCCAAGACCCTGAGCTGGGCAAGGTGGGCATGTTCTGCTTCCTATCGACTCTTTTTCTTTCCTTTAATCGTAATCATGTATACAATTCCTAA
>F01_transcript_100265
ATGTCGCGAAAAGGTTTGATGGAGCAGGATCTGAGCAAGCTGGATGTGACAAAACTACATCCTCTCTCACCTGAAGTTATATCTCGGCAAGCTACGATAAATATTGGAACTATCGGTCATGTGGCACATGGAAAATCAACTGTTGTAAAAGCTATATCTGGTGTTCAGACTGTTCGTTTCAAAAATGAGCTGGAACGCAACATTACCATAAAGCTCGGATATGCAAATGCAAAGATATACAAATGTGAAGATGAACGCTGCCCACGCCCGATGTGTTACAAGGCTTATGGAAGTGGGAAAGAAGATGCTCCCGTGTGTGATGTGCCTGGATTTGAGAACTCCAGGATGAAGTTACTGAGGCATGTGTCTTTTGTTGATTGCCCAGGTCATGATATTCTC…
>F01_transcript_100266
ATGAGGAGGATGAGCCGCCTCTTTGGAGGAATGTCAAATTCCGCCAAACAAATTCCTTTGTCATTCAAGAGCAAGAAAAAACTCTACCTGCTCACATTTGCATCCCTCATACTCGTAGCTGCCATAGTCGGGATTTCTGTCCGACTAAATAATACCGGCCACAATTCTTTCCAATCCCAAAGTCTTCAAGGCACACCCGCTCATACCGTCCTCAAAACCTCATGTAGCACCACATTATACCCGGAGTTGTGCTACTCCACCATTGCCACTGTCCCTGGCTTCTCCAAAAAAATTACAAGCCAGAAAGATGTAATCGAGCTCTCCATTAACATCACCGTCAACGTTGTGGAACAAAACTACTTCAAGATCAAAAAGCTCAGCAAGAGAGAGAATCTAACC…
>F01_transcript_100267
ATGTCTGCCGCCCATAGTGTTGGTTCATCGGCTTCTCATACTTACGCTGCTGCTCTAGGTTCTTCCTTGTCAAGAAGTACCACTCCTGACCCTCAGCTTGTTGCTAGGGCTCCTAGTCCTCGGATTCCTACTGTTGGAGGAGGGAGAGATAACTCCCTGGATAAAAGAAATGTGAACGGCTCAAACTCATTCAAGGTGTCGCATGGTATGAGTGAGCAAGCAGATCTTGTAGCTGCTTTGTCAGGAATGACTCTATCAACAGATAGCCTTGTAGATGAAGAGAACCATGCAAGGTCTAGAATTCAACAAGAGATCGATGATCACCAGAACATATTTCATTTGCAAGGTGATCAGAAACATATTAAACAACATCCGTACCTAAACAGGTCCGAATCTGGG…
>F01_transcript_100269
ATGGGTGCAGGTGGCCGGATGCCCGTTGACCCTAAGAGCAAGAAGTCAGAAGAGGAAGTTCTCCAACGAGTTCCTGTCTCAAAACCTCCATTTACTGTTGGGGATATCAAGAAAGCCATACCACCACGTTGTTTCCAGCGATCTGTCCTCCATTCTTTCTCTTATATTGTTTACGACCTGACCATCGCCTCCATCCTGTACTATCTTGCCACCAATTACATCCAACTCCTTCCTCACCCTCTCTCATACGTGGCGTGGTCTATCTATGGTTTTGTTCAAGGCTGTTTCTTAACTGGTATTTGGGTTATAGCCCATGAATGCGGCCATCATGCCTTCAGTGACTATCAATGGCTCGATGACACTGTTGGTCTTATCCTCCACTCCTCTCTCCTCGTCCCT…
>F01_transcript_10027
ATGGATGAGAGACTCGAAGCTGCGGGGAAAGATGTTCTAGTTGAACTTGTGAAGTTGGCTCAGAAACGGGGAATGGAAGGTAGTAAAGGTGGGTGGAAGGATTTCTTGAGTTTGTTTGATAAGAAATTTGGTGCTAGCTTGAGTGATCCTTCAAAAAGGTCCACTGATGTTCTGCTGGCTTTTCTGAAGACATTTAGCCAAGAGAATGACTTGAAGTATTTTGAAAAAGTGATGGAATGTCATGTTAACCGCGATGCTGTGGAGAATTTCCAGAAGAAATCTACTGATATTGAATCCCCAGAACAGAAGCTTGTCCGCTTAACTCTTGAACACCATCAGTATCCATCAAATTATTCGTTTCCATCGCATGAGGAGGGGTGGTTGGTTACAAAGAGAAAT…
>F01_transcript_100270
ATGTTTAGTACTTTTCCTCCTTTACTAATTTACAATAACAAATCAGGGAAAGTTCATCTTATTTTACTTTTTTACATTTCCTTTTGCCAGCACACAATATATATTCCACTGCCAACTTGGGGAAACCATACAAAAATTTTCACTTTAGCAGGATTGTCAGTGAGGACTTATCGCTACTATAACCCCGGAACGCGTGGACTGAACTTCCAAGGAATGCTGGAGGATCTTGGCACTGCCCCATCAGGAGCAATAGTGCTTCTTCATGCATGCGCTCACAATCCAACAGGTGTTGATCCAACCCTTGAGCAGTGGGAGCAGATCAGACAGCTAATGAGATCAAAAAGCTTGTTACCCTTTTTCGATAGTGCATATCAGGGTTTTGCTAGTGGCAACCTTGAT…
>F01_transcript_100271
ATGGAAAATCACTCGGATCAGTCCCAGCTAAAAACTACTCACACCGCCATTAATGGCAACCGAAACATCATATTCAACAAGTACGAGATGGGCAGGCTATTAGGCCAAGGCACTTTCGCCAAAGTCTACCACGCCAAAAATCTCACCACTTCAGAAAGCGTGGCCATAAAAGTCATCAACAAAGACCAAGTCAAGAAACAGTTAGCCATGATGGATCAAATCCAGCGAGAAATCTCCGTCATGCACTTAGTCCGACACCCCAACATCGTCGAATTCAAAGAAGTCCTCGCCACCAAACACAAGATCTTTTTTATCATGGAGTACATCAAGGGCGGCGAACTCTTCACAAAAGTCGCTAAAGGTAAGCTTAATGAAGATTTAGCCAGAAAATACTTCCAG…
>F01_transcript_100273
ATGATTCTACAGTATTATATGGATTGCTTACTACCTTTGTGTGGGAAATTGCAGATAAGAGTGTCATCAAAGATGAGCAATGGGCCGATAATACTAAATGTAGACTGCGATATGTACTCTAATAACTCTCAGTCAGTGAGGGATGCTCTTTGCTTTTTCATGGATGAGCAAAAGGGCCATGAGTTTGCTTATGTTCAATACCCCCAAAATTTTGAAAATGTTTCTAACAATGATGTTTACGCTAGTTCCTTAAGAATAATTAGCGAGGTGGATTTCCATGGCCTGGATGGTTTGGGAGGTCCTCTATATGTTGGAACTGGCTGCTTTCACAGAAGAGATACTCTTTGTGGAAGAGTTTTCAGTAAGGATCAAATCAGGAGTGAATGGAAGAGAGGCAGT…
>F01_transcript_100275
ATGCTATTTGATGCAGCAGTCGGTGACATTGCAATTATCACAAACCGTATAAGGATTGTGGATTTCACTCAGCCACATATAGAATCAGGGATAGTCGTAGTTGTCCCGGTGAAGAGGTTGTACTCAAGTGCTTGGGCTTTCTTGCGACCATTCACTCCATTAATGTGGGGAATCACAGCAGCCTTATTCCTCATCGTGGGAGTTGTAGTCTGGATTTTAGAACACAAAAGAAATGATGAATTTAGGGGGCCGCCAAAGAAACAACTTGTAACAATTTTGTGGTTTAGCTTCTCGACTATATTTTTTGCTCACAGTAAGTATCCACTAAGAAGTTTGAGACTAATCTTCAGAAAGAACATTGTACCGGCCTTGTATCCACTGCAAGTTCCAAATTTTGGC…
>F01_transcript_100276
ATGCAGATTCAAGGCACAAGAAAGTATTGGAGTTCCGTTGTCATGAAAGACAGTACCCATTTAAAACCTGGCACACAAATTTATGGTTATTACTCAGGAATGTTTAAGGCTGGCTGTTCAATATGGAAGGAACAAGGTCTCAGGGGATTATATGCTGGATACTGGTCTACACTTGCAAGGGATGTGCCATTTGCTGGTTTAATGGTTACATTCTATGAGGCACTAAAAGATTTATCAGATTTTGGGAAGCAAAAATTGTTCCCTAATTCAAATTACCGTGTCAATGGTTCTCTTGAGGGGTTGTTATTGGGAGGATTAGCTGGAGGGCTTAGTGCATATCTCACCACTCCCTTGGATGTAATCAAGACTAGATTGCAAGTACAAGGAGCAACTTTAAGG…
>F01_transcript_100279
ATGGCGTGCGGGAGCAGTTGGGCAACCACAACATGGAGTATGTCATCTCTCAAATCAGCCTTACCTTCCCTCAACATTAACAAACCTTCTTCAATTCGCCTCTCACTTGCCTCCTCTCGCCTCAGAATCTCTCCCACTTCTAAGGCTCTTCGCTCTTTCCACGGCCTCGCGCCTCTTCACCAACTTCTCTCTCTCAACTCTCAAGAATCCAATAGTTTTGAGAATTGCTTCACAATTATTGACAATGGGGGCCGATTCTCTGCTATGAGACATGGTAAGCGTGTACCTAAACTCAATAGGCCCCCGGACCAGCGCAAGGCACTTCTGCGTGGCCTAACAACCCAGCTACTAAAGTATGGACGCATTAAAACTACTAGAGCAAGGGCTAGTGCTATGAGG…
>F01_transcript_10028
ATGGAATTGGTTGAGCCTGCTGTGAAAATGGAAAGTGAAGGGACTAGGAGGAATGCAACCCTAATTTGTGCGCCTATAATGGCGGATTCGGTGGAGCAAATGGTGGTTCAAATGAATAAGGCGAAATTAAGTGGAGCTGACCTTGTGGAGGTTCGATTGGACTTTTTGAAGAGGTTTAGTCCGACGGAGGATATAAAATCCCTAGTTAAACAATGTCCTCTGCCTACTCTTTTCACTTACAGACCTAACTGGGAAGGTGGTCAGTATGATGGTGATGAAAAAAGTCGTCTGAACGTGCTTCAATTGGCCATGGAATTGGGAGCTGATTACATTGATGTGGAACTTCAGGCTGTTGATGAGTTTAACAATTCAATGCGTGGTAAAAAACCTGCAAAGTGC…
>F01_transcript_100282
ATGGCTCAGATTCTGCTTCATGGAACTCTTCATGTCACGATCTACGAGGTTGATAAGTTGCACAGCGGAGGCGGCGGTGGTCCACATATCTTCCGTAAGCTAAGAGAGAACATTGAGGAGACTATTGGCTTTGGAAAAGGGACTCCAAAAATATATGCATCTATTGATCTAGAAAAGGCTAGGGTTGGGCGTACAAGAATGATAGAAAATGAACCGAACAACCCTAGGTGGTTTGAGTCTTTTCACATCTACTGTGGTCATATCGCTTCCAATGTTATATTTACTGTGAAGGACGACAATCCCATTGGTGCTACTTTAATTGGACGAGCTTATGTGCCAGTTCATGAACTCTTGGAAGGGGACGAAGTGGACAGATGGGTTGAGATCTTGGATAAAGAC…
>F01_transcript_100284
ATGGAGGAGCTACAGATATCTCCCGCCGATGATCCGAGAGGGAGTCCGGGAAAGGAGCAACAAGCGGCTGGGGTGGGCATCCTACTCCAGATCATGATGCTTGTCCTTTCTTTCGTCCTTGGGCATGTTCTGCGCCGTCATAGATTCTATTATCTTCCTGAAGCTAGCGCCTCCCTCATGATTGGTTTGATTGTCGGTGGGCTTGCTAACATTTCCAATACCGAAACTAATATCAGGGCCTGGTTCAACTTCCATGAAGAGTTTTTCTTCCTATTTCTGTTGCCTCCCATCATATTTCAGTCAGGTTTCAGTTTGGCACCCAAGCCATTCTTTTCAAACTTCGGAGCCATTGTCACATTTGCGATTCTTGGAACTTTTATAGCTTCTATTGTTACTGGC…
>F01_transcript_100288
ATGGCACGAACGGAAATCGTCGGTGGTGGAGACAAGAGATGGACTCTCGAGGGAACAACTGCCCTTGTCACCGGTGGAACTCGAGGCATAGGGCATGCAATTATAGAAGAGCTAGCAAACTTCGGCGCAGTAATCCATACTTGTTCTCGAAACCAAAAAGAGCTTGATCAATGCTTAGAAGAATGGAAAAGCAAGGGTTTTGGAGTCACAGGAACGGTCTGTGACCTAAAATCGCCAGGCCAACGGGAGCAACTAATGAAAACTGTCACCTCTTTGTTTAACGGAAAGCTCAACATCCTAGTAAATAATGCTGGAACAGCTAAAATGAAAGAGGCGACGGAATACACTGCTGAAGATTTTTCAAGCATAATGAGTGTCAATTTTGAGGCCTCGTACCAT…
>F01_transcript_100289
ATGGACGGATTGGATGTATTATTAGCTAAGCAAAAGTGCACACCTAAAACAAGTGAGACTGAGCGAAATGGTACTTCTCCAGTGCAACCTTCACCAGCTGCTAGTTGGTTTTCATCTTCAAAATCATCGAAGAAGCTATCTTTAGCATCTGTTACATCAATTGTTGATGGCTTGAAGAAGTTGTACATTCAGAAGCTGAAGCCGCTAGAAGTCACATACCGTTTTAATGATTTTGTTTCTCCCTTATTGACAAACAGTGATTTTGACGCCAAGCCTATGGTGATGCTTTTGGGTCAATATTCCACAGGGGAAAACAACATTTATTAA
>F01_transcript_100293
ATGTCAGGCCAAAGCCAACGCTTGAATGTTGTTCCTACTGTTACAGTGCTTGGAGTTATTAAAGCTCGCCTTATTGGCGCCACAAGAGGTCATGCTCTTCTCAAGAAGAAGAGTGATGCTTTAACCGTGCAGTTCCGTCAGATTCTTAAAAAAATTGTCGAGACTAAAGAATCAATGGGAACAATTATGAAATCTTCCTCTTTTGCATTAACGGAAGCCAAATATGTTGCTGGAGAGAACATCAAGCATATTGTCCTGGAAAATGTTCAAAGTGCATCGGTTAAAGTTCGATCCCGTCAGGAGAATGTTGCTGGTGTGAAGCTCCCCAAGTTTGAACATTTCACTGAAGGAGAGACAAAGAATGACTTGACTGGATTGGCAAGAGGTGGTCAACAGGTG…
>F01_transcript_100294
ATGATATCGCCATTAGTCCTTGCATTAATTGCAGAACCAACAGCTGTTAATATTTGCTCATTATCAGCTCCCATATCCTCTGCAATCTCAATGCAATGTGATGCTACTAGTGCTGCTGCAGAGGCAATTGCAGCAGATGTTTTTGAATGTGCCTTGTGTTGGGCACTTGACGCTTCAGGACATGTCAATGAAGAGGCTGCAAGAGCAGCCACAGCAGCAGCGACCCCTGCCACGGACACTGCTGCGTGCAATTGGGCATTCTGA
>F01_transcript_100295
ATGACCAAGAGCGGGGTGGACTGCAGTGTGCTTACCAAACCATATCCATATCCAGTAGCTGACCTAGTTGTTGGTGGCCTTCTGGCTGCTCACGCTCAAAAATGGACAAAACATCGAAAAATAATCAGCCCAGCTTTTCATCTGGAGAAGTTAAAGTACATGTTACTAGCAATAAACTTGAGCTGCGATGATATGATCAAGAAATGGGAAATATTAGTCTCAACAAATGGTTATGCAGAAGTTGATGTGTGGCCTTATCTGGAAGATTTATCTGGTGATATGATTTCGCGAGCAGTATTTGGCAGTAACTTGGAAGAAGGAAGAATTATTTTTCAACTTCATAAAGAACAACCAATCTTGGATTCAAAATGA
>F01_transcript_100297
ATGGGTTGTCAAGGCTCCAAACTCATTCCATGTTGCTTGGTTTTGGAATATAAGGCATCGATAGTTGAGGCACCAGATGCTGGGAATGAAGAGAATGGTGATGCTGGTAACTTGCCTGCATTCCATGAATTCACATTTGAACAACTTAAAAATGCCACATCTGGTTTCGCGGTGGAAAACATTGTCTCCGAACATGGGGAAAAGGCTCCAAATGTTGTATATAAAGGGAAACTGGATAATCAGAAGAGGATTGCTGTTAAGCGCTTTAACAGATCGGCTTGGCCTGATTCCCGACAATTCTTGGAAGAAGCAAGATCTGTTGGACTACTCCGCAACCCTAGGTTGGCAAATTTGCTTGGTTGCTGCTGTGAAAATGATGAGAGGTTACTTGTGGCCGAA…
>F01_transcript_100299
ATGCAGTTAAAAGAGGTACCACAAGCACACACATGCATGAAGCCTACCTGGTGTGTAGTCAGGATGTTTAAGTTTTTCCACTCTCTTAGCCTCTTTCTATACCAGGTTAAAGCAGCTGTGGATGCACTGCTAAACACGAGTGGCTTGAAGTGGCCAACCACATTTGATCAGCATAGGCAGAAAGAGGAATTAGATGTTCGTGATTGGCTAATGGCCATGTTTGGATTTCAGGGATGTGTTCTTAACTACAGAATGAGAAATTATTTGCCTATAGTTGTTGTATTACTTTTGTGA
>F01_transcript_1003
ATGAATTTTCTGATGCTGCGGTCTAACCAGACTGCAGCTTCGGAGCAGCCATCCACTCAGGAATTTCAGGGGCAGGCAAATCTTGCAACAAAACCTGCTACCACTTTGGAGGGACTTATAGCTGAAGATCCATTTCCAGTCACTCCCTCATCTGACAGTGATCGAGAGCGTAGTGGTAGATTTGGGAGAGGAAATGCAGGTGTTGTAGGCTCTAATGCAAATAATTATTCCTCAAATTCAGAGAATCATGCTGATGTTATTGAAGACCAAGGATGGATTACCATTCCATACAAGGAGCTTCCTGATAATTGGATTGAAGCACCAAATATACAATCATTTCACTCTTTGGATCGCTGTTTTGTTTTTCCAGGTGAGCATGTTCATATCCTGGCATGTTTA…
>F01_transcript_10030
ATGGCAAACATAGACATTGCGGGAATCTTGAAGGAACTTCCAAATGATGGTCGTATTCCAAAGACAAAAATCGTGTGCACTCTCGGCCCATCTTCTCGATCTGTACCAATGATTGAGAAGCTTTTGAGGGCAGGAATGAATGTTGCTAGATTTAACTTCTCGCACGGGACCCATGAGTACCATCAGGAGACGCTGAACAATCTCAGGATTGGCATGCAAAACACGCAGATCATGTGTGCCGTGATGCTTGATACCAAGGGACCTGAGATTCGAACTGGTTTCCTGAAAGATGGAAAACCTATTCAACTAAAAGAAGGTCATGAAGTCACAGTAAGCACAAATTACAGCATAAAGGGTGACGAGGAAACTATCTCCATGAGCTACAAAAAATTACCTGTG…
>F01_transcript_100304
ATGTTTGGTCAAGGTACATTGTTTCAGATAACTTTGAATATGCCACCGGATTATGCTGCTTCCAAAGTTGCATTGTGGACAACAGCAGTGGAAGAATCTCTTTGGAGTGTTAATCTTTTCAATGGAGGAGTTGCTGACAAGCAGGCTGGAAAGTACAGTGGAGGTATGAAGAGGAGGTTTAGTGTTGCCATATCACTAATTGAAGAGGAGGTTCAATGTTGCCATATCACTAATTTAGTTTCACTTGTATTTTTTAATTCATGTTATTTCATAATCAATGCTTGA
>F01_transcript_100305
ATGCTCCCAAATGGACTAGAAGTTGCGGTGAAAAGGCTTTCTAGAGGCTCAGATCAAGGTGAACAAGAATTCAAAAATGAGGTCACATTAGTGGCACAGCTACAACACAGAAATTTGGTTACGCTTCTTGGTTTCTGCTTTGAAGGAACAGAAAGACTTCTTATATATGAGTTTGTGCCAAATGCAAGTCTTGACCAGTTCATATTTGATCGAGTAAAGCGTTCATATTTGGATTGGGATAGGCGATTCAAAATCATAGGAGGCATTGCTAGGGGACTTCTTTACCTTCATGAAGATTCTAGGCTGCGGATTATTCATCGTGATCTCAAAGCTAGCAATGTTCTGTTGGATGCAGAGATGAATCCAAAAATTGCAGATTTTGGTATGGCAAGGTTGTTT…
>F01_transcript_100308
ATGGCAGTGAAATTTGTCCAAAATACGCACTACATGTTTAGTGTTGGGAAAGATCGCCTTGTAAAATATTGGGATGCTGATAAGTTTGAGTTGCTTTTAACTCTGGAAGGTCACCATGCTGAAGTTTGGTCTCTCTCAATCAGCAATCGTGGTGATTTTCTTGTCACGGGATCTCATGATCGTTCTATACGTCGTTGGGATCGTACTGAAGAACCATTTTTCATTGAGGAGGAGAAAGAGAAAAGGTTGGAAGAGATGTTTGAGTCAGACCTTGATAACACATTAGATAATAGGTATGCACCTAAAGAAGAACTCCCGGAGGAGGGAGCAGTGGCCTTGTCAGGAAAGAAAACTCAAGAAACCCTCACTGCGACTGACTCCATTATTGAAGCACTAGAC…
>F01_transcript_10031
ATGGAGTTCACTTCGGATCCAAAACCCTCAGAAGAAGAGATGATTAGCTCGTATGTCAAAACCCTAGCTTCGGTTACTAGAAGTGAGGAAGAGGCGAAAAAGAAGATCTACTCTGTTTGTACATCGACATATACTGGATTTGGTGCTTTGATTACTGAAGAGCTTTCCTACAAAGTGAAAAGTAGAGATGCATTGGCAAAAATTGTGTACTCACGATTATTTGACTGGAGAACTATATCAATTATAAACCAAGTTCAGCTGGCAGAGATGACAACAGGATGA
>F01_transcript_100311
ATGTTGTTCGCATGTTTCTCTGTTTATCAGAGTTGCTCTGATGCAAGGGTTATGTGGGATCAGAAGACTGGGCGTTCAAGAGGGTTTGGATTTGTTTCCTTTAGGAATCAACATGATGCTCAGAGTGCAATTAATGACCTAACTGGAAAATGGCTTGGCAGTAAACAGATACGATGTAACTGGGCGACAAAAGGTGCTGCTGGTGCTAATGATGACAGGCAGAGTTCAGACGTCAAAAGTTTTGTAGAATTAACAAATGGTTCTTCAGAAGATGGTAAAGAGGTGGCAAATAGTGATGCTCCTGAGAACAACCCTCAGTACACAACTGTTTATGTCGGCAACCTTGCTCCAGAGGTAACTCAGATCGACTTGCACCGCCTCTTCCATGCTCTTAGTGCT…
>F01_transcript_100312
ATGCTTGAAGATGGCGTCCTTGATCCAGAGACCACAGTGGTTTCCATATTCCCTTCTCCCATGCACTATGTTGGTCCAACTGAGGTGAAATGGCATGCAAAGGCTCGAATTAATGCAGGTTTCAACTTCTACATTGTGGGTCAATACCCTGCTGGCATGAGACATCCAGTGGAGAAAATACATTTATATGATGCTGACCATGGGAAGAAGGTTTTGAGCATGGCTCCTGGGCTGGAGCGTCTAAACATCCTCCCTTTCAAGGTGGCATCATATGACAAAACTCAGAGTAAAATGGCATTCTTTGATCCATCCAGAGCACAAGATTTTCTCTTCATCTCGGGTACCAAGATGTGCACACTTGCAAAGAGCAGGGAGAACCATCCGGATGGATTTATGTGT…
>F01_transcript_100313
ATGGCGGCCACAATGAACCGCCTATTCAGACCCTTATTCTCATCTCCCCCCTTAATGAATCACTTAAGGAGGCCTATGTCTACAGCGGTCTTATCTGAAACCGATATTAGATTGAAATCTCCTAGTTATCCTCATAATCCTCTCCCTCCCCGTGTAGATCCCAAGGGCAGGAATGTCCAATGGGTTTTCCTTGGCTGCCCGGGCGTCGGAAAAGGCACTTACGCCAGTCGCCTCTGTTCCCTCCTTGGTGTCCCTCACATCGCCACCGGGGATCTCGTCCGGGAGGAACTCGCGTCCACTGGACCACTCTCCGTTCAGCTCACAGAGATAGTCAATCAAGGGAAGTTGGTTTCAGATGAGATTATAATAAGCTTATTGTCAAAGAGACTTGAGGCTGGA…
>F01_transcript_100315
ATGTTGGAGGACTTTCTGAATCAGGCAATGGCTAATAAGGAGGCAAAGAAAAAGATGAGTAGCAGTAATGCTAAGGCCTTGAATTCAATGAAACAGAAACTAAAGAAAAACAACAAGCAGTATGAAGAGCTAATAAATAAGTGCAGAGAGAATCCTGAGAGTGAGGATGAAGGGGATGAAGATAAGCAGACAGACGAGGACGAGGATGAAGATTTGGAGTTTGAGGAGGACCCAACAAAGATTGCAATGGGGGCGGACTTGGATGAGGAGGATGACGAAGAAGAAGATGAGAATGATGCGGCTGATAGTGATAGTGGTTGGGAGAAGAAGATGAGCAAGAAAGATAAGCAAATGGACAAACAATTTAAGGATCCAAGGTCAGACCACATGGGATACTGT…
>F01_transcript_100316
ATGGAGTTGGTTTTGAAGTTAATTTTAAGCTTTTGTTTTATTGTTGTGGTGATATTCGGATGGAGAATTTTCAATTGGGTTTGGTTGAGACCAAGAAAGCTTGAAAAGTACCTGAGAAATCAGGGTTTCAGTGGAAACTCGTACAGATTATTTTTTGGAGACCTGAAAGATATGGCTGTGATGAGAAAAGAAGTATACTCCAAACCCATCAATCTCTCTGATGATATTATCCCCCGCATCATTCCCGACTACTATAAAACAATCCAAACCTATGGAAAGAACTCATTTTTATGGCTTGGACCAAAACCAATGGTTCACATAATGGACCCTGATCATATCAAAGAGATCCTGACTAAGTTTTATCAGTTCCAAAAGCCCAGGGTAGGTAATCCTTTAACA…
>F01_transcript_100317
ATGATTCAAAAGGCAGGTCTTAAGCTCCATGTATCACTCTGCTTCCATGCTTCCAAGGAATCCAAGATTCCACTCCCCAAATGGGTATCTCAGATAGGTGAAGCTGAACCTAGTATCTTCTTTATGGATCGGTCAAGCCATCATTTTAAAGAGTGTCTGTCATTGGCAGTGGATGATCTTCCTGTTCTCAATGGAAAGACTCCAATACAAGTTTACAAGGACTTCTGCGAGAGCTTCAAGACTTCTTTCTCGCCTTTCCTGGGTTCTACAATTACGGGCATATCAATTGGTCTAGGACCAGATGGTGAGCTTCGATATCCTTCTTACGGCCAAAAATCCAAAAATACTAATATTCGTGGAGCAGGAGAGTTCCAGTGTTATGACAAAAACATGATCAAC…
>F01_transcript_10032
ATGGCTTCTATTAGATTTGATGCTGCCAAACAGCACTATGCAACAAGTAGTCTTGTAATTGGTTATGCTCTATGTTCGAGCTTACTTGCAGTGATAAATAAGTTTGCCATTACCAAATTCAACTACCCTGGTCTTCTCACTGCGTTGCAGTACCTCACTTCAGCTCTAGGTGTTTGGGTTTTAGGCAAATTGGGGTTGTTGCATCACGATCCGTTCATTCTTGAGACTGCAAAGAAATTCATGCCTGCTGCAATTGTTTTCTACCTCGCCATCTTTACAAATACGAATTTGCTTCGTCATGCCAATGTAGATACATTTATAGTGTTCAGATCATTGACTCCCCTTTTGGTTGCCATTGCTGATACTGCTTTTAGAAAGCAACCGTGTCCTTCAAAGCTT…
>F01_transcript_100320
ATGATGTCTATTCTGCAGAACCTTCACAGCATTACAATTTCGAAGTTGTGGTTTGTACTGAAGACCCCAGAAATTTGTAAGCAGTTTCGAGGCTCTCTAATTGAGGACTCACAAGTAGTTTGTCTAGGTGATGGGAATCCCAAGGAGCAGGCAATTGAGGCTGGCAACTCTAATGCTGGAACTTCTGCCTGTCTGGAACTGGAGATGGCTGTTGAAGAAAAAGAGAAGGATTTGGGAAGTGACCATGAAATGATTAGTCTGGAGGACCAGAACACTGAGGTCGGCAATACTAAGGCAGGAAGTTCTTCCTGTCCTGAGCTGGAGATGGGTTCTGTGGTGGATAAGGAGAAGTCTTCTGGAAGTGACTACGGAATGGATGGAAGGGCGTTTGCTGAGGCA…
>F01_transcript_100324
ATGCCTCCTTCAGCACTTGACTTGCTGTTGAGAGTAACCTTCCCTGCGTCAGCAGCTCGAGTAAAGGCTACCGAAAGGTTTGAAGCCATATATCCCACCCTCAAAGAGGTGGCCCTTGCTGGAGTCCCTGGAAGCAAGGGAATGAAACAGGTTTCACAGCAGACGCTGACGTTTACTGTGAAAGCAGCAGGGGAAGGCATCCTGATCTATCCAGAGAAGCAACAAACATCTTTATCTGGTGTTTGA
>F01_transcript_100326
ATGTGCTCTTCATTGAATGGAAACCAGCCTCAACAGAACGTGGATAGGCAAATGCATTGCATTCTTGTTGCTGCAAGTAACCCTTATCCCTTGCCCACACCAGTTTATCGACCACAAATGCAAAAGTTGGAGCAGAGTGAAAATATTGAGACACAAGTAGATAGTCGACTGTCTGATGCTGAGACAGTTGCTAAATCATTTGTGCAGGTACTGATCATAAAGCTGTGTTTTCCTTGTTCGCGATATTATGGTTCTCTCTTTTGTGTGTCAGTCGACTCATTTTTTTTCTACCTGCAGTGTTCTGTTTCTCTATCAGTTATTTGTCCGAAACAGCTTCCAAAACTTAGAGCAATCTACAATGCGGTAATGATGGAAAATTTATTATCCTTATATATATTT…
>F01_transcript_100329
ATGGTGTGTCTGTGTTGCTGCTACTCATTTGGTGCTCGTCTACTTCTGCAAGTATATGATGTTGTTGGTTTATGCTTGTGCTGTTTGGGCCTTGCTGTTGCCCTGCTACCTATTGCTGTTGCAACTTATATGCTGCATGACAGCATTGATGTTTCTTTGCTGCAGTCTGTTTCGTGCGGCTGTTGTTTCTTCTGCTGCAGTCTGTTTCTTCTGTTGCAGGATGCTATTGTCACTTGGGTGAAGAAGAAGACGGGACCTAACTTACATAACTTAACAACCATTGAGGATGCAGAACATATATTGACTGCTGAATCAAAGATAGTGTTGGGTTTTCTAGACACTTTGGTGGGTCCAGAGAGTGAAGAGCTTGCTGATGCTTCAAAGATGGAAGATGATGTC…
>F01_transcript_100330
ATGGCAACCGATGAAGAACATGTGGGTAGTCTTAAGCAACAATTAGCAAAGCTATTTGAAGCATCACTTAAAATAACAGTCCCTGATGAGTCGGATGTAGAACCTTTGATTGCTGCTTGTAATAAGCCAGGATTTGGTGATTACCAATGCAACAATGCCATGAGCTTATGGACAAAAATAAAAGGGAAGGGTACTGAATTTAGAGGTCCTCAACCTGTTGGACAGGCTCTTAAGAACAATCTTCCTGCATCAGAAATGGTAGAGTCATGCAATATAGCTGGAGCTGGCTTTGTGAATATTGTATTGTCGAAGAAATGGATGGCGAAGAGCATCCACAAGATGCTAATGGATGGTATTGGAACAATGGCACCAAAGCTTCCTGTTCGAAGGGCAGTGGTT…
>F01_transcript_100332
ATGCGAAGATTGTATCAAGCCATTGAAGCTGCCAAAAGTTTGGAGGCAGATTTTCTATTCCCAGCTGACTCTTGTAAGAGCAGACTGATACATTCCACTCCTTTGGTGCCTGTATCTAGTTTGCTTAATGAGGAGCAAATACTTTCAGTTGAACTGATTCTTGGTTGCAATGGAGGGGCTCCCTATGTGATATATGGGCCTCCAGGTACTGGTAAAACTATGACTATAATAGAAGCTATCCTCCAGCTCTACACAACTCGAAAGAATGCCAAGATTCTTGTTTGCGCACCTTCAAACAGTGCAGCAGATCATATATTAGAGAAACTTCTAGGTGAAAAAGCAGTTAAAGTTCAAAACAGAGAGATTTTAAGACTCAATGCACTCACTCGTTCTCTTGAG…
>F01_transcript_100333
ATGACGAGATGTCACATTGCACCTATGAGTTCTTATGGTACTCAATGTCTTATTTCACTCTGTTCTAATCCTAAATATATGTTTCAGGTGCCAGTGGACCTTGTGATTGATCATTCTGTTCAGGTTGACGTAGCAAGAACTGAAAATGCGGTGCAGGCAAACATGGACCTTGAATTCCGAAGAAACCATGAAAGGTTTGCTTTTCTAAAATGGGGATCAACTGCCTTCCAGAATATGCTAGTCGTTCCTCCTGGTTCTGGTATTGTTCACCAGGTAAAAGTTTTGCATTGTTGA
>F01_transcript_100336
ATGTTGCCACCTGATTCATCTTGTGAGGACAATGTTTACATGGCCAAGCTCGCCGAACAAGCTGAAATATATGAGGAAATGGTTGAGTTCATGGAAAAGGTTGCTAAATATATACCAAAGGCTGCAGTTGTTGCTGGGTTAACAGTGGCAGAGGTTACTGGAAGCAATGTTGTTTCTGTTGCAGAGGACGAACTCATGAGAATCCTCATTCTTGTTCGTAATTTCTTGCCCGGATACCATCAGGTCATCAATGGGGAATGGAATGTTGCAGGAATTTCACACAGCTTATGA
>F01_transcript_100337
ATGAGAAGCATATTGAGGAGCTTAGGAGATGCATGCATTGGAGATGATCAAAGTGCATTGCTGCATAAAATAAACCTATATCTCTTTGGCAAGAGGTATTTGATTGTGATGGATGATGTTTGGAGCACAGACAACGATTGGTGGCTCAAAATCAGCGAGGGATTGCCTAAAGGAAACGGAAGTAGTGTTATGATTACTACGCGAAATGAGAAAGTTGGTCGAAAGATGGGAGTTGGGGAGCCAAGAACTCATTGGCCCAAGTTTCTTAATGAAGACAATAGTTGGTTATTGTTCCGTAAGATAGCATTTGCAGCAAGTGGAGGTGAATGTCATCATTCTGAGCTGGAGAATGTTGGGAAGGAAATAGTTGAAAAGTGTAAAGGTCTTCCATTAGCAATC…
>F01_transcript_100338
ATGGGTTCCAGATTCCCATCTCATCAGCTGAGCAATGGCCTTTATGTATCAGGTCGACCTGAGCAGCCAAAAGAAAGGACCCCTACAATGAGCTCAACAGCCATGCCATATACTGGCGGAGACATCAAAAAGTCAGGAGAGCTTGGGAAGATGTTTGATTTACCTGTAGATGGATCCAAGGCGAGGAAATCTGGACCGATAACTAATGCTCCTTCAAGAACTGGATCTTTCGCAGGAAGTGCTTCACATTCAGGACCAATCATGCCTAATACCGCAGCTAGGGCTAGCTATTCCACATCAGGTCCTGTGTCATCTGGTGGGGTTTCTGGTTCAGTTAATGTGAAGAAGTCGAGCTCTGGACCGCTGAATAAACATGGGGAACCATTAAAGAAGTCATCT…
>F01_transcript_100343
ATGGGAAAAATGGAGAAACATGTTACAAGCTGGTTTAATGTTGAAGAAGTGCCTAGTAGTTACATATTTCCGCAGGAATATAGACCAGGGAAGCTCCCTATTCCAATATGCAACACTATTCCAGTTATTGACCTTGGTAAAGCAATGGGTGCAGAACATATTCATACAATTCAGCGCATCATGGAAGCTGCTCAAGTATTTGGATTCTTTCAGGTGGTCAATCATGGAGTCCCGGAACGTATAATAAGCGAAGCGATGAGTGTATTGAAGGAGTTTTTTAACATGCCTGCTGATGAGAAGGCAAGTTCTAATCCTAGTAAAAGTGGATGGGTCTATACCGGCAGCACTGGTTACACCAAAGATGGGGTTCATTTGTGGAGGGATAACATAAAACTCACT…
>F01_transcript_100344
ATGTGCTTCAAGTTATTCGATAAAATAGACGACATTGCTGTGTGGCAGAAGTCTTCAGACAATAGCTGCTATAAGCAGCTTGATACCCCTGACACATACCCACCAAAATGTGATGATGGCACTGAACCAGATTCAGCTTGGTACACTCCACTCCGGCCTTGTGTTGTTGTTCCAAACAAGAAGCTCAAGAAGGTTGCACTACCATCCATTCCCAAATGGCCAAAAAGGTTGCATGCTGCACCCGAACGTGTTTCCGATGTTCGCGGTGGCAGTGATGGTACCTTTAATAATGACAACGGAAAATGGAAGGTGCGAGCGAAGCACTACAAGAAGTTGCTACCTGCTATTGGAACTGATAAGATAAGAAATGTAATGGACATGAATACGCTTTATGGAGGT…
>F01_transcript_100346
ATGTTTTCCTATACTTTTTTAGTTTTGGAAAATGCTAATGAAATGGTTCGATATATAATTGTCCAGGTTCTTGACCTGACAGATAGGCTGCTACTCAAAGAGGAGAAGGATAAGGACAAGGGGAACTTGAAATTATTTGATAAGCAAACACCATCTGAAGCACCACCACAAGAACACATTGGAAATGAGGTTTCTGAGGATGGCGGCTCAATTGGAGCTTGCAAGCAGGAGGATTTTACCTCGGTGAAAAGTGATGTATATGATTCAGAGAGTCCACACTACACTGATGGAGTTCACTCCTCTCTCCTAGAGCCAGGTGATTTTTTGGAACCAGATCAATCAGATATGTCTCAAGATGAAGAAGATAACTTGAGCAAGAGCTTGTTGCTTCCACTAGCT…
>F01_transcript_100347
ATGGGATGGAAGCCTCAGAAAGTTCCTATTATTTCAGCAGATGGTGGGATTTCACGAAAACGAGAGACTTCTCTTCCTGCTGAGGAGATTACCAAGTCCTTGGCAAAGATGGGTTATAAGGTGATGACCTCTGATGACGCTGGTCGGTTTGTTTGCAACTATGTCTACTATCATTCCTTGCGTTTCGCAGAGCAGAATGGGATTTTATCACTCTTTGTCCACGTGCCCTCCTTCTTAACTATAGACGAGGAGACCCAATTGCAATTTGCTGCTTCCTTGTTGGAGGTACTTGCCTCTTTAAATTAG
>F01_transcript_100348
ATGGTGGTTTTGGGCAGTCACGGCTATGGTGCTATCAAGAGGGCATTTCTTGGGAGTGTGAGCAATCACTGTGCGCAAAACATCAAGTGTCCCGTTTTAATAGTCAAGAAGCCCAAACCTACCTCTTCTGCTTCTGCTTCTGCTTCTGCTTCTGCTGAGAATGCATAA
>F01_transcript_100349
ATGTGGGTGATGAAGTTTGTGTATTGTGGTGCCTTGTATGTTAATAAGGCTTGGTTACTTTGGCAAATGATTTCTGATGGAAGACAGCTAGCTGCTACTTATGTTAGGGCATGTTTGGCTATGACCTTTAATAACTTAAAAGACTACTAA
>F01_transcript_10035
ATGGAAGGACCTGCACTGGACCTTTTCAAAGCTAAGTTAGAGGCTGTCATGGCTGAAGCTAGATCTCAGCAGGCTGCATCTATGACAGAATTCAATTGGTTAGGGCATAGGTTTCCAATATCAAACGCGAAGACGCGGTTTTCCATATTGAAAGCTCAGGAGCTGGAGAAAGATCTTCATGGTCCAACAGCAGACTCTCGTCCGGCAGAAAAAAGACTGGTCATGTTTGACAAAATTTTTGCAGCGTATCATGAAGCAAGGAGCAGCATTCGTAATGACTTGGCCACTGCAGGTAACTCTGAAAACATGAAAGATGATCTGAGTGGCCTTGATAAAGCAATTGGTGCTGTCTTGGGACAGCAAACTATTGAACGGAACCAGTTGTTAGTAAGCATAGCG…
>F01_transcript_100350
ATGAAAAGCTATGGGGATCTTTCAGTTTTCTACTATCGTCTCCAACACATTGAACTGGCATTGAAATATGTCAATCGTGCTTTGTTCCTTCTCTATTTTACGTGTGGACTGTCACACCCCAACACAGCTGCAACTTATATAAATGTGGCTATGATGGAAGAGGGCACGGGGAACGTTCATGTTGCTCTCAGATACCTGCATGAAGCCCTTAAATGCAACCAAAGATTATTAGGAGCAGATCATATACAGACTGCTGCTAGCTATCATGCCATAGCCATAGCCCTTTCATTGATGGAAGCATATTCCCTGAGCGTACAACATGAACAGACCACGTTACAAATTCTTCAAGCCAAACTGGGAGCAGAGGATCTTCGTACTCAGGATGCTACTGCATGGCTC…
>F01_transcript_100355
ATGGTTTTGAAAAATGATGCTGTTTTGAGCAAACTTCTCTATGGCTCCTTGCATGTGAAAACTTATGATTGGGTTGAGCCTAGACGCATTAACAGAAGCAAGGGAACTGAAGGTCTTAATCTGAACTCATTCCAAATTTCCGATGTAAGTTTTTAA
>F01_transcript_100358
ATGGATGACATGGGTGCCATTCACTTTGCTGCTCAGAAAGGTCATTTAGAAGTTGTCCGGATTCTGTTTTCATCTGGGGTTTCTGTCAAATCTTCCAATCGCAAGGGCATGACTGCTCTTCATTATGCTGCTCAAGGTTCTAACCAGGAACTTGTGAAGTACTTGGTTAAGAAAGGCGCAAATCTAAGTTCAAAGACCAAAGCAGGGAAAACACCTATTGATCTTGCGGGCAGTGAAGATGTCCGCTCATTATTAATAGAAAGTGAAAGTATACCAAAAGACAAGGCCGTTGATGGTGAAGAGAAAGCTGAAGAAGCTAAACCAAAATTGTCTCAGGAACAAGCAGAGGGTTCTGAGGCAGAAGCTGCTGTGTCTCAGCATATAGAAGCTGATCATGAG…
>F01_transcript_100359
ATGCAGTGTATTGGACTTAAAATGCAGCCATGTGGAGCCGATTTTTGTTTCTACAGCAGCATCAAGAGGGGAAAGCTAAGTTTTGTAGACCTTACTGGTTCTGAAAGAGTCAAGAAGTCGGGGTCTACTGTTAGTCAGCTAAAGGAAACTCAGGGCATCAATAAATAA
>F01_transcript_10036
ATGCTGAAGGTAAATACGGGATCCATAATGAGGATGAAGAACAAATACAGGAAATCAACCACTTTACGTTGCAATGCAGGAAGCAGATGCACATTATCTGTTGTCGTCTGGACCCTGGTTGGATGCCTTCTTATGCTTCAGCTGTACTCCCTGATTAATCACGAAGATATTCACGGTGGAGAGATCCAAATGCATACGATTCATCACCCAGTATTCCGAGAACTTGAAGTGGTCGAAGAGGAGAATATTAAAATTCCCCCACCAAGAAAACGGTCCCCACGTGCAGAAAAACGGAAGCCTAGGAGGCCAACCACCCTGATCGATGAATTTCTTGACGAGTCTTCCCAGATTAGGCATATATTCTTTCCTTCTCAGAAAACTGCTATAGATCCAAGGAAG…
>F01_transcript_100360
ATGTATCTAGAAGTTTCCCTGAATAAACCAGCAAGATTAGACCAATCTGTAAAAGGATCTTCAAATGCTCTTGGAGAAGAGATGATTCTTGCGAGTCCTGAAAGTTATGACAGTGCTGTAGAGCTTGAGAACCTCCTTACAGCAACACCCATAAAAGAACGTGAAGATACGGACTGGACAAGGGCTGAAGATCTGGTTAACACTAGAGGAAGAGAAGAAGTGGAATTGATAAGCTCCAGCACTAGAGGATTTGTTGTATCTTTTGACTCTTTGATTGGATTTTTACCTTACCGCAATCTGGCAGCCAAGTATAAGTACTTAGCTTTTGAGTCTTGGTTGAGAAGGAAAGGCTTGGACCCTTCAGTGTACAAGTAA
>F01_transcript_100362
ATGGAAGCTCTGAGACAGCTGGGTGTAGGCATTTGTACTCCAAGACTCCTACCGCCACCGCCAAACCCCAAAAAACCCACTAAACTCAACGCCGTTACCGGCGGCGATAGTAGTAGCAGTGTTCCCAATAACTTCTCCGCCAGCAAATGGGCCGATCGCCTCCTGGCGGACTTCCAATTCCTGCCTTCCACCACCGCCAATTCCGACCCTCCAGACCATTTGACCACCACTCTCTCTCCTCCCTACCCTCCCCCCGTCGCTACTCCCGACCGCCACGTGTCAATGCCCATCGACTTTTACAGAGTACTGGGTGCAGAAACGCACTTCCTCGGTGACGGAATCAGAAGGGCATACGAAGCTAGGGTTTCAAAACAGCCCCAATATGGGTATAGTGAAGAA…
>F01_transcript_100364
ATGGACTGTTATATGAGGGATAACGAGACAATTGCAAATTTATTTGTTATCGAGCGTAATAAATCTCTGAGTTATTTTGCTTTCGATATCTTGCAAAGTTTTGGAATCAAGGCTTTCCCTTTTAATCTGGAAAGCGTTGTGAAGATAGAGATGAAAAAACAACGGGAAGCAATGGTGTTAGCCAAACTTTTATCACCCTCAGCTCCCTTACGTTGTGGTGGTTCTTCCTCCTATGGAGGTTCTTTCGGATACATGGAGGATACTATCGTGGCCGAGCTCTCAGGGCATCATGTCCTTTTATTGTTTGCTACTCATTCTTGCATAGGATCTGGATCATTTTTGTCTGCTTTGAAGAAAATGTATTGCGAAAAAATGTTGACAAATGATAAGTTTGAGGTT…
>F01_transcript_100366
ATGGCTAAAATCAGAGATAGAACTGAAGACTTCAAAGATGCTGTCCACAGGGTAGCGTTGTCTTTGGAGTACAGTGAGTCAAAAATGGCAGCTATAATGGCATCTTTCATTATGCACAAACCTCGACAAAGATCACCTTTCACCAAAGCTGCTCTGAAGACGCTTGAGAGCATTGGAGAACTACAGCAGTTCTTGATGAAGCATAAGAAGGACTACGTTGATGTGCACCGCACCACTGAGCAGGAGAGAGATAGTATTGAGCATGAAGTTACAATTTTTATAAAAGCGTGCAAAGAACAGATAGACGTACTAAAAATTGGTATAAATGATGATGAAGCAAATTCAAAGGGCTGGCTTGGTATCAGGGGCGATAGCCCTAATGCTGATACCATAGCTCAC…
>F01_transcript_100369
ATGGCGGTGTTGCTGGAGGACATAGTCCGATCGATTGAGCTCTGGTTAAAGCTCATCAAGAAACCTGAGCCATATGTTGACCCGAATCTTGACCCGGTTCTTCTGGTGCCTGGAATCGCGGGCTCGATACTGAAAGCTGTTGATGATAACGGGAAAGAAGAGCGGGTTTGGGTTCGGATTTTTGGGTCCGATCGTGAGTTTTGTACGAAGCTTTGGTCTCGATTCGATCGTGCTTCAGGTAAATCCGTGTCCTTGGATCCCAAGACACATATTCTGGTCCCTGAAGATAGAGATGGGCTGTATGCAATTGATGTATTGGATCCTGACATGATCATTGGGCGTGAAGGCGTAAATTATTTTCATGACATGATTGTTGAAATGACCAAGTGGGGTTACCAA…
>F01_transcript_100370
ATGACACCAATGACCAAGAAGTTAAAAGATCTTAGATGGCATCTAGTGACCAATTTATATTTATATGACCTTCTCTTAGAAGAACAACAGTGTAACTTTACAGTTTCTTTGTTTCTGTTGCAGTGGCCTCACCAATTCGAACTACACGGAGTTGGCACAGTTGTATGA
>F01_transcript_100372
ATGGAAGAGGTAAACTCTCTAAAGGAATCCACTGCAGTAAAATTAAATGATAATAGCGACGATGTGACAGTGACATCGATAGTGACAGCAACCAAAGTGATTACAGAAGTTTCCGAGATCGAGAGCAAGAGGGAAGAAAAATTCCAGATAGATCTGTTGGCTCCACCTCCTCAATTGAGAGCATCCGCAGAAAGGGATGGAGCTATAGATTTTTCTGGTGATCAAAAGAGGATGGTTGTTGATATGGAAAAGATGGGGGAGATGATTAAAGATAAAGAAGACAACAAAGTGGGCAAGACTAGCATGGAAGAAACAATAAAACAATTGAACGAGAAAAGGGCAAAGGTAATAACTGAAGAAGTTCAATCGCAAAATTCATCAATAAACAAGGAAAGGAAT…
>F01_transcript_100373
ATGGATGGTGAAATGCCTGACTATTTGCTTGCGAAGGATTTGATCTTACGAATTATTGGTGAAATATCTGTCTCTGGAGCAACATATAAGTCGATGGAGTTTGTTGGCTCTACTGTGAAAAATTTAACTATGGAAGAGAGGATGACATTATGCAACATGGTTGTTGATGTTGGTGGAAAAAATGGTGTTGTCCCAGCTGATGCTACAACCTATAAGTACCTTGAGGACAAAACATCTCTTCCCTATGAACCAGTTTATAGTGATGGGCAAACAAGGCATTGA
>F01_transcript_100375
ATGGCGTCACCCAATTCCAATTCAACGGCGGAGGATCATGAAGATCAACCCATCATCAGAAGAATAAACCGCCTCACTCTACACCTCAATCCGGCATCACCCAAATCTGATCACTGCCTTGACATCCAGCTGCTAACCTGCGCGGCCTGTGCGAAGCTTAACGTGAGCACCCCACATCTATCTTCATACATGAGGGGAAAACACAGGGACTTGCAAGAGAAAGTATATGAATTTTTCAAGTCAAGGCCTGATCTTCAAACCCCAATTGAGATTTTGAAGGATGAACATAGGGAGCTTTGTATGAGGCAGCTTGTGGGTCTGGTCAGAGAAGCTGGGATTAGGCCTTTTAAGTACGTTGTTGATGACCCTTTTAAGTATTTCGCCATTGCTGAAGCTGCT…
>F01_transcript_100376
ATGATTTCAGTAGGATCTACAATGAATTATGGGAATTTGGGTACTAAAACCCAGTCTTCAAATGGTGGAACGTACACTGACATATCTTATAACATTCTTGTTGATCTGTGTGCTAATAGGAATGTACACAAGAGGTACAAAGTGATCATTTTGATATTTTTTTGA
>F01_transcript_100377
ATGGCGAAATCATCGTCGGACGATTTTATTGGCGTCGATCTGGGCATTGACGCTCGCCCCTTTCTGTCTCCTTCAGACCACCGCCCTGAAGAACATAACTGGCATGATTGCCCTTCTTATTTAGCTGACGAAGACTTCTCCGATCTTGACGCCTTGCAGTTCTTCCGCCTCGAACCTGCTGCTGACAAATCCGGCAACCGTATCTTCCGCATCGTCGGAAAATACTTCCCTGCCCCAGCTGTAAGTGCCGAACGGCTGAAAAAGTATGTGTTGCACAAAATCTTCTCTGAGATACCGGAAGGGCCATTCTGCATTGTTTACATGAATAGTGCTGTACAAAAGGAATACAATTCCCCTGGCATAAGCATCTTGAGGTGGATATATGAAGAGCTTCCTTTT…
>F01_transcript_100379
ATGGTGATTGAGCACTCTTCCAGAGGAGAGAGCTTACAACATATTCTCTCGCCTCCTGAAGGAACGTATCATTTGCATCAATGGCCCCGTATCATTTGCATCAATGGCCCTGTTTCCGACGATACCTCTCACGTCGTAGTCGCGCAGCTCCTTTTCCTTGAATCTGAAAACCCTTCCAGACCCATCCATATGTACATCAACTCTCCTGGCGGCTCCGTCACTGCAGGTCTCGAATTGGTTCATAAATGCACGTGTGCGGTTGTGGAAACCCATGGTTGA
>F01_transcript_100380
ATGACACAGACAGCTGCGAATGATATGTATGCGAGTGAATGCCAGGACCCCAGTAGTTTGAATAAGGATATTATCAAAGGGAACCTCTTAATTTGCACCTACTCAATCCGTTTTGTTCTTGGGATCTCCACCATCAAACAGGCATTAGTTACAGCCAAAAACCTTAGCGCAGCTGGTGTTGTATTCTACATGGATCCTTTCGTCCTTGGTTTTCAGCTTAATCCGGTTCCAATGAAACTACCTGGGATTATAATTCCTTCTCCTGACGATTCTAAGATCTTACTTCGATACTACAATTCTTCCTTGGACAGAGATGGCCTCACGAGGAAGATTGTTAAATTTGGGGCTGTTGCGCGCATTTCAGGTGGAGTAAAGGCAAATTTCAGCAGTTCTGCCCCA…
>F01_transcript_100386
ATGAATGCTTTAAAGGCTAAAGAGTTCTATCGGCGGGACGTCCAATACATGGTAAAAGATGGGAAGGCTCTCATCATAAATGAGTTGACTGGGAGAGTGGAAGAAAAAAGGCGATGGTCTGAGGGGATTCACCAAGCTGTGGAGGCTAAAGAAGGTCTGCAGATTCAGGCTGATTCAGTTGTTGTAGCGCAAATAACATACCAATCACTATTTAAACTATATCCGAAGCTATCAGGGATGACAGGGACTGCGAAAACGGAAGAGAAGGAGTTCTTAAAATGTTCCAGATGCCAGTTATTGAAGTGCCTACAAATCTGCCAAATATACGTAATGATTTACCCATCCAAGCTTTTGCGTGTTGAGAATTCTGAGTACCTCTCTGCTCAGCTGATGGAGTGG…
>F01_transcript_100387
ATGCAATATGGTTCCATTGGATGGTCAGTGGGTGCAACTCTTGGTTACGCCCAGGCTGCTAAAGACAAACGTGTGATTGCCTTCATTGGCGATGGGAGTTTCCAGTTCATTGTAGTGCACAAGTCATATTTGATCGTCGAACTGCCATAA
>F01_transcript_100391
ATGGACATCATGAAGGAGAAAGCCCAAGCGGCCAAGGACAAGGCCTCTGAAAAGGTTGGATCCGCCAAAGAGCGTACCCTAGAGTCCAAGGACCAGACGGGCAGTTACCTCTCAGAAAAGACGGGTGCGACCAAAGACAAGACTTATGAGACGACTGAGGCGGCTAAGGAGAAGGCCGGTGAAGCGGCCCAAGCCGGGAAAGAGAAGACCGGCGGGGTTCTGTCCTTGGCAGGGGATCAAGTGAAGAACATTGCACAAGGGGCTGCTGATGCTGTTAAGAATACTTTTGGTATGGGTGGGGCAGCTGAGGATGACCAACAGACGTGCAGACAAAAACTCTATAATTTTTTGCGAGGCCAATCATGTCCTTAA
>F01_transcript_100393
ATGGCCTCTTCTCATGGTAAAATCAGTGTTACAACATCTTCATCTCCTAAACATGGTAAAATCAATTTTACAACATCTTCATCTCCTAAAGAAGGTGGGGGGTCATCATCAGCACCTGTAAGTTCACCAAAAGGGCAGTGTTTGTGCTCCCCAACAACACATCAAGGATCTTTCCGGTGTAAGTTTCACCGGTCGTCGGACGGAGTTGCATGGTTTAAGAGATCCAAGTCCATGCCGCCGGCAAGAAACGTAACTGCCCTTTCTCCCAAATCTGTCGAGTCTACATAA
>F01_transcript_100394
ATGGATAACAATCTCGATCTCAACTCCCCACACTCCATGGGTACAACAATCATCGGAGTCACATACAACGGCGGTGTTGTCCGAACAGTTATTATAAACTCTGATGGAGTGACAAGGAACTTCTATCCTGGTGACAAGCTCCCGCTATGGTATGAGGAATTGGAGCCTCAGGATTCGTTGCTAGATATACTGAGTGTTTCTGGTCCTGAGCCAATGAACATTTAA
>F01_transcript_100395
ATGCTTCCTCTTCGAAGACCAGACCTGTTCAATGGTGGACTTCTTAAGCCATGTCGAGGCATATTACTCTTTGGGCCTCCTGGTACTGGAAAAACAATGCTCGCAAAGGCCATTGCCAATGAAGCTGGAGCAAGCTTTATAAATGTCTCAATGTCAACCATCACTTCAAAATGGTTTGGGGAAGATGAAAAGAATGTCCGAGCTCTCTTCACACTTGCAGCCAAGGTTTCTCCCACTATCATTTTTGTGGATGAAGTCGATAGCATTCTTGGGCAGCACACAAGAGTTGGTGAGCATGAGGCTATGCGAAAAATTGGGATGGGCTGCCAACAAAACCCGGTGAGCGCATCCTTGTTCTTGCTGCTACCAACAGGCCATTTGACCTTGATGAAGCAATTA…
>F01_transcript_100398
ATGGATCTTGATGTTTTATGCTGGTGTGCTTCGGATGTTGGAAGATGTCCATATTTGGATGGGTTCAGATCTGGGTTCAGATCTGGTGTGCTTCGTCTTTATTATTATCTCTCTTTAATCTTTTTTCTCTCCTTCACCATTCTCCCAGCACTGGAAGTTTGA
>F01_transcript_100399
ATGGGTTACCTTTCATGTAAAGCTGAATCATCCATTTCAATTTCCAATTCTCAAAATCCAGTTTCGTCATCTTCTTCCTCCAAGAACAAAACCCAACCCAATCCACAGCATGAAAAACCCATCAAAATCCAAGAATTCAATTACAGTGATCTTGAAGCAGCCACCAACAAATTCTCTCCCCAGAAGCTCCTAGGCAGAGGAAGCCATGGCCTAGTCTATGAAGCTGTTTTGAAGAATGGCCGGCATGTTGCTGTGAAAAGACCCTCTAGAGGTACCCATTCTAAGCCTCGATTTTCTTCTTCTTTGACACCTGAAAACCCAAATGAAGTTGAGAATGAAATCGAGATTTTGTCGAAAATTCATAGTCCTAGACTTGTTAATTTGTTGGGTTTTACGAAT…
>F01_transcript_100401
ATGGTCAGATTTGAAGCTTTCCCTTCAGAGTTTTTTCCTAGAAGTCAGGCAGTGGCGATTGATGATTCTAGGATGGATGACATCTTAAAGGAATACTTCATTCCTGATTACATACTTCTACCTAAATCAGACATAACAAAAGTTTCCCATGTTCCTTCCTGTCCTGTGATAGTATTCATTAACTCGAAAAGTGGTGGCCAGCTGGGAGGAGAACTCCAAATGACATATCGTCTTCTTCTAAATAAAAATCAGGTAGTTGATTTGGGAGAAAAGGCGCCTGACCAGGTGCTACAGCAACTATATTTCAATTTAGAAAAGCACAAGCAAAAAGGGGATAACTTATCCTCAGCAATTCAGAAGAAATTGAGATTAATAGTTGCAGGTGGTGATGGAACAGCT…
>F01_transcript_100402
ATGCACAGCAATGGCGCAAATCACTACATTTCTACAGCCGCTGAGGTTCAGGGTTCTCCAACCTCAAAAGCCTCCCTTCCAGCAATTTCATTTTGTGGAAAATTTAAACCTGTAAAGACTTGGATGAATGGCCTTCAATCACCTGCACATCACTTTACTCCTTCAACTTCCAATTGGAAATTTTATTTGAGAAGATATCTTGATAAGCCCAAAATCCGTATCTCAGGATTTAAATTTAGTATGTGGAGCATCCTTGGTGGGTCAGTTGTACTTGGATTGGTCAGCTTTTGTTCAGGAATTGCATATTCAATGGATGGATTTAATATTTTGCTGGATGATCATTCTTGTGTGGGCTTGTCTGGTGCATCAGACTTCGAGGAAGATCAACACACTTTCTTG…
>F01_transcript_100404
ATGGCGGCATACAGAGCCGACGAGGACTATGATTATCTATTCAAGGTTGTCCTGATCGGAGATTCAGGTGTCGGAAAATCCAATCTGCTCTCCAGATTCACCAAAAATGAATTTAGTTTGGAATCCAAATCCACCATCGGTGTTGAATTCGCCACCAGAAGTATTCGCGTCGACGATAAGATCGTCAAGGCCCAGATTTGGGACACAGCTGGCCAAGAAAGATACCGTGCAATAACAAGTTCGTATTATCGAGGGGCGGTTGGTGCATTGCTTGTGTATGATGTCACCCGACATGTCACGTTTGAGAATGTTGAGAGATGGTTAAAAGAGCTGCGAGACCACACAGATGCCAATATTGTGATAATGCTGGTGGGAAACAAGGCTGACTTGCGTCATTTG…
>F01_transcript_100405
ATGGCTGTGGCTAGCGCTTGGACCAGGGGACACTCGGCCCCAGTGCCACATATCAGATATTCTTCCCACTCTGCTTCTCCTTACGGTTGTTCTGTTTCCAATAAATTTGTCGATTTTAGATTGCGTTTCATATCGGGTTGGAATTGCACTGTACCTAAAACCCCAATTCCCAAATACGGTGACAAGAATTCAAAGCGGCATCTGTATTGCCGTTGCAGCAGCAATAACAATAACACCACCATCACCACTTCTTCTTCGTCTCCTTATTCTTCAGACTGGGATTGGAATCGATGGACCCGACACTTCTCTGAAATTATACAGGCTGAGACCTTTTCTTCTATTCTCAAGTTTCAACTAGAAGATGCAATAGAGAAGGAAGATTTCCTGGAAGCTGCCAAG…
>F01_transcript_100406
ATGGTGTTGCAGAAGAGGTTAGTGTATGGATTTAACGGGTATCAGGTGCCTCCAACTCCCAGAGCCACCAGATCAGCCAGGAGGAGGGTCCCGTTTAGGAAGAAAGTTGATGACGAACAAATGAGTGCATTCGACTTATTGGCAACCGTCGCTGGCAAGTTATTGCTGGAGGGAGATAATATTCCTAGTTCTAATGAGATGTTTACGGCAAAAGAAAAGTTTGCTGTTGAGAAAGATTATGTTAAGAAGGAACAACTGGCTGAAGATAACCCTGATAAAGCAAACCTTTGTGATGAAGGAAGCTGTCGCAGGAATTTTTTGTCTCTGAAATTGTTTCACAAGCACCTGCTGTGA
>F01_transcript_100408
ATGAAGAATATTGATGAAGAGAATAGGTTTCACCAAGTTCTTAAGAGTTTTGTGCAGAATGCTGAGGTTGATGTGATGTGGTTGGTTGAGGAAGAGAAGAGAATAATGGCTCTGGTGAAAAGTACAGCCGATTACTTCCATGGGAAGAAAGGATGA
>F01_transcript_100411
ATGGGTGGCCTTGGCAAGACGACTCTTGCCAGAAAAATTTATACGGATCCCTCTGTTGAGTATTACTTCTACATTCGTGCATGGGTATATGTTTCTCAAGAATACAGTAGAAGAGAGGTGTTTCTTGCCATTTTAAATTCTCTTACCCAGCTCACCGACCAAATGTTCAAATCTAGTGATGAACAGTTGGCTGAAGAATTACGAGAACATTTAAGTAGTGGTAGATATCTCATTGTAATTGATGACGTGTGGACAATAGATGCGTGGAACGATCTTAGAATGGCTTTTCCGAACAGGAATTGTGGAAGTAGGATATTGTTAACAAGTAGAAACACAGATGTAGCACAGCATGCTAACCCTGATAACCCACCTCATCCTCTGCGTTTCCTAACTGATGAT…
>F01_transcript_100412
ATGTATGGTATTGCAGTAGCTGCTCTTGGAATGCTGAGCACTATTGCTACTGGGTTGGCCATTGATGCATATGGTCCAATCAGTGACAATGCAGGAGGCATTGCTGAAATGGCAGGAATGAGCCACAGAATTCGAGAGAGAACTGATGCTCTTGATGCTGCAGGAAACACCACTGCAGCTATTGGAAAGGGTTTTGCAATTGGATCTGCAGCTCTTGTGTCCCTAGCTCTATTTGGTGCATTTGTGAGCAGAGCAGGAATTTCAAAAGTAGATGTCTTGACACCCAAAGTTTTCATTGGTCTGCTCGTGGGTGCCATGCTTCCTTACTGGTTCTCAGCCATGACAATGAAGAGTGTGGGTAGTGCAGCTCTTAAGATGGTTGAAGAAGTACGCAGGCAA…
>F01_transcript_100415
ATGGGAGGGATGACATCATCCATGGCGGCCAAGTTCGCCTTCTTCCCACCCAACCCACCTTCCTACAAGCTGCTCACCGACAATCTCACCGGCCTATTGCTTCTCAGTCCCTTCCCTCACCGGGAAAACGTCGAAGTTCTCAAATTGCCCACCAGAAGAGGCACGGAAATAGTAGCGGTTTATGTCAGACATCCGATGGCCACCTCCACTCTACTCTACTCCCATGGTAACGCTGCCGATCTGGGTCAAATGTACGAGCTCTTCATCGAATTGAGTATTCATTTGCGTGTTAACCTCTTGGGGTATGACTATTCTGGATATGGGCAGTCCTCTGGGAAGCCAAGTGAGCAGAATACGTATGCAGATATTGAAGCTGCATATAAGTGTCTTGAAGAAAGC…
>F01_transcript_100417
ATGGAAGCTGTTCTCAAGGTTTTGAAGGATGGGCTCTCTACTTTACATGCTCCTTACGCATACGGTTTTGCAATTATTCTCCTTACGGTACTTGTAAAGGCTGCCACCTTTCCTTTAACAAAGAAACAGGTGGAGTCTGCAATGGCTATGCGGTCTTTGCAACCTCAAATAAAGGCTATTCAGCAACGGTATGCTGGTGATCAGGAGAAAATTCAGGTTGAAACTGCTCGATTGTATAAATTAGCTGGGATAAATCCACTGGCAGGATGCCTTCCTACCCTTGCCACCATCCCTGTATGGATTGGGCTGTATAGAGCCCTTTCTAATGTTGCTGATGAGGGACTCCTATCAGAAGGCTTCTTCTGGATACCCTCCCTTGCTGGTCCAACAACAATTGCT…
>F01_transcript_100418
ATGTCCGATGAACGCATTGGTTGTTCTTTGGCTGATGCTGCTTCTAGTCCTGTATATATGGATTATCTTGCAGCAGCTTCTGTGTCTTCTCCCTCTTTGCATGTCGTCTACATAAACACTTCGCTAGAAACAAAAGCTCATGCTCACGAACTTGTGCCGACAATAACCTGTACTTCTTCTAATGTTGTGCAAACCATCTTACAGGCATTTGCTGAAGTACCTAACTTAAATGTATGGTATGGTCCTGATTCCTACATGGGTGCAAACATTGTGGAGTTGTTCAAACAGATGACAGTAATGAGTGATGAAGAAATTGCCGGCATACATCCTAAACACAATAGGAATTCAATTAAATCATTGCTGCCTCGTCTGCAATATTATCAGGATGGAACATGCGTT…
>F01_transcript_100419
ATGGAGTTTCCCAAATCTCCTTGTTCATGGGATGAGCTTCTTTTCCATTACAATTTGCTCCCATTCCACAAAGAAGAAGACTCGCAACACAACAACTTCAATCCTCCAGTCTCCGTGCTCCCAGATGAAGAAGAAGACAAAGAATCATCCGAAAGCAGAAATGAAGAAGAAATAATCTCGAAAGTGAAACAAGAACAAGAACAAGATCAAGATGAAGAACCCGAAAAGGAAAAGCGTTACATCGGAGTCCGTAAGCGGCCTTGGGGAAAGTTTGCATCCGAGATTAGAGATTCAACAAGAAATGGAATAAGGGTTTGGCTTGGAACTTTTGATAGCGCGGAGGAGGCGGCTTTGGTTTATGACCAAGCCGCTTTGTCTATGCGGGGCTCGTTGGCTCAC…
>F01_transcript_10042
ATGGCCGACGAAGCCAAAACCAAAGGCAACGCCGCCTTCTCCGCCGGCAACTACACAGACGCCGTTCGCCACTTTACCGACGCAATTAACCTCTCCCCCAACAATCACGTCCTCTACTCCAACAGATCCGCCGCCTACGCTTCCCTTTGCAAGTATACCGAAGCCTTATCCGATGCCAAAAAGACCGTCGAGCTCAAGCCAGATTGGTCCAAGGGCTACTCCCGGCTCGGCGCAGCGTACGTCGGCCTACACAACTACAACGACGCTGTTGAGTCTTATAAGACAGGCCTCGAGATTGACCCCAACAACGAAGCCCTAAAAGCCGGCCTTTCAGATGCACAATCCGCCGCGGCAACCAGATCCAAGCCTTCGAACCCGTTTGGCGATGCGTTTGGGCCG…
>F01_transcript_100420
ATGAGATGGATGGATTACATCCAGGGCAAGGAGGAAATCGGAGAACTATTTGAACAGATTTTGTTAAAGAAAGTCTCATTTGAGCCTCCAGTGCTAAATGCTGTAGCAAAGGTGGAAGCAGCGACTAATACAAAAAAAGACTCTGCAGGGTGCTAA
>F01_transcript_100421
ATGAAGAAGAATCTAAACAAGAAGCCTATAGTTCCTGCTGATTTCTACAGAGCAGTGCGTATAACACAACTTATAGGATTGTCAGGTTACACAAGAGAGGGCCTTCCAGTCTTTGCTATTGGTGCAGGTCTCAGCACATTTGACGACAAAGCATCTAGTGCACCTGCCGAGTCTAACTTGATCAATGGATTTCTGGAGTTGCAAATAAATGGAACAACTTGA
>F01_transcript_100424
ATGCTTGACTCCGATGTGAGGCCAACAAGCATCATAATGGATGATACTCTAGTTACAGGAAAGAAGAGGAAGGCCAGACAAATGTTTCCAACAAGGCCTAATATCAGGGCTGCATTGTCTAACTTAACTTCCCACCTGCCAAAGCAAGCCATCTGA
>F01_transcript_100427
ATGCTTGAAGAAGTCTCTGCTGATGAAACTGAAGTTCTTGAGAAAATTCTCTTGTATTTGAAAGATATGGGGAAAACTAAGAATATCAAGGAATTTATTGTGTTGAAATTGAAAATGGAAGGTTATGCAGCTTCTCTCTGCAAAAATTCTTGGATCTCTAACTTTGATCGCCCTTCAGGTGATTACGAGTGCATTGATATCATGGTGGACGATGAAAATGGGACAACCAAACAGCCCACAAGATTAATAGTAGATATAGATTTCAGGTCTCAATTTGAATTGGCAAGGCCTACAGCAACTTATACAGAGCTAACATATGCTCTACCATCCATATTTGTTGGAACTGAAGAAAAGCTAAACAGGATTCTCTCTTTGCTCTGCTCAGCTGCCAAACAGTCC…
>F01_transcript_100428
ATGAGCCTTCTTTCTGTATTCCTTCTCTGTGAATGCTACCGATCTCCCGACCCTGATTATGGACCCTCCAGAAATGGCTCCTATATGGAAGCTGTTCAGATGATCTTAGGAAATAGGAGGGCGCAGTTTTGTGATATTTTGCTTCGGATAAATTTTTACAAGACTGGAGTTGTCTATGTCGTTACATCTGGAATAAGCATGAGAGCAATTCAGCAATCAAACTGTTATCACAAGGAAGGGCACAAAGCTGCTTGTGAATACGGAAATACTTCTTATATGCTTTTATTTGGATTCGTTCAAGTTATAGTTTCCCAGATACCTGATTTTCATAATACGAAGTGGCTCTCCGTTGTTGCTGCTGTCATGTCCTTCACCTATTCTATAATTGGATCAGCACTT…
>F01_transcript_100433
ATGAACTGTCACCTTTACATAAACTTGGAAGGAAGTAGCAGTGCTGTGAGTGAAAATGTACGAAGTGTGACAATGCCGCCACCGCCTCCTCCACCTCCTCCACCGAAGGAACCCACCTTCAGCTGTCCTGTTTGCATGGGCCCATTAGTTGAGGAGATGTCAACGAAGTGCGGCCATATATTCTGTAAGGCATGTATTAAGGCATCAATAGCTGCTCAGAGTAAATGCCCTACTTGCAGGAGGAAGATCACCATGAAAGATACCATTAGGGTCTACCTTCCTACCGCCAGTTGA
>F01_transcript_100434
ATGATCGGCGCCGGAGGTTTCATTGGATCTCACTTGTGCGAGAAGCTGATGTCGGAGACGTCGCACAAGGTTTTGGCGGTGGACGTTTACAATGACAAGATCAAGCACTTGCTTGAACCGGCCACTCTCTCCTGGGCCGATCGGATTCAGTTTCACCGCATCAATATCAAGAATGATTCCCGACTCGAAGGTCTCATCAAGATGGCCGATCTGACCATAAATCTTGCAGCGATCTGTACACCAGCTGATTACAATACACGCCCTCTTGATACGATCTACAGCAACTTCATTGATGCCCTCCCTGTGGTGAAATACTGTTCAGAGAACAATAAGCGTCTCATTCACTTCTCTACTTGTGAAGTTTATGGGAAAACAATTGGTAGCTATCTTCCTAAAGAT…
>F01_transcript_100436
ATGAAAAACCAGCTTAGGGACTGCAAAGAGTCAGAAGTTCAGGCCCAAGCTCTTGTTGGTGAAACTCTTTTGCAACTAGAGACGGCTAAAAGAACTGTAGAGAGTCTAGGATCAGATAACACTAAAGCCATGGAAGTGTACGATGCTATAGCTTTGGAATTGGATCAATCGAGGGCGCGTGTAAATTTGCTGGAAGAGCTTGTTGACAAACTTAAAAAAGAAACTACCACTGCTGCTAACAGTGTCTCTCAAAATTCTGCTGAAAATGGAGAAAGAGAGAAGTCAATTGAAGCAGAGCTTGTATGTGTAACTTCTGAAGTAGAATATTTAAGGTCTGCTCAAGAAACTGCAGAGATCAAATACCATGAAGAACAAATTCGAAACACTCTGCAAATTAGA…
>F01_transcript_100440
ATGGTTGCTGAATTTGACGAGTACACAAATGATTGGCTATATCTTCGTGAGGGGTCTATCCTCCCCAAGCCCCAATATAGAAAGAAGATCTTACCCTCATCAGACCCTTCTGTTGTAGTTCAGGCGATGGCTCCAAAACAGCCAAATACAGGACTCTTTGTGGGTCTGAACAGAAGACATATTGTAACCAAGAAGGAATTTGAACCACGCCCATCTGATAGAAAAGGAAAAACCAGCAAAAGAACCATTTTTGTTAGAAACCTTATCAAGGAAAACATATAG
>F01_transcript_100441
ATGCTTTTTGACAAGGTTGATGAGCGAGCAGTCCTCAGGCACTTTGATTGGCCTGAAGGTAAAGCAGATGCATTAAGAGAGGCGTCATTTGAATATCAGGACCTGATGAAGCTAGAGAAGCAAGTCACCTCTTTTGTTGATGATCCCAATCTCCCTTGTGAAGCTGCTTTGAAGAAAATGCATAAGTTGCTCGAAAAAGTAGAGCAGAGTGTTTATGCATTATTGTGTATAAGGGATATGGCTGTTTCACGATACAGAGAATTTGGCATTACGGTTGACTGGTTACAAGATTCAGGAGTTGTTGGCAAGATCAAGCTCTCTTCTGTACAATTGGCAAGGAGTTACATGAAGAAGTGA
>F01_transcript_100445
ATGAACGCAGTATGTGATTGTGAAAGGCGAGCTCAACTTAAAACGTCCTGGACCGATTCAAACCCGGGAAGAAGGTTTTTCTCATGTCCGAATTATGGAAAAGTAAGTGTGTTAGGGTTCAAATTTTGTTATATATATTCCATTCTATTTACTTACACATATCTTTGA
>F01_transcript_100446
ATGGAGGCAAAAGTTGCAAAACGGGAACAGGCACTGGATAAGAAACTTGAAAAATTGAAGGAGAAAGAGAAGGATTTTGAATCAAAGTTAAAAGACTTAAAGGATAGGGAGAAGTCTGTCAGAGTTGAGGAGAAAAAGATGGAGCATGAAAGGAAACAAATACTCTCAGATAAAGAGGACCTGCTTAGTCTTAAGGTTGAGATTGAAAAAACCAAGGCAGACATTGAAGAACAACGATTGAGACTAAATGAAGAGAGTGAACGGCTTAAATTAACAGAAGAAGAGAGGTCGGAACATGTACGCCTGCGGTCAGAACTTAAACAAGAAATAGGCAAGTGCAGACTTCAGAGGGAACTGCTTTTAAAGGAAGGAGAGGATTTGAAGCAAGAGAAGGAGAGG…
>F01_transcript_100447
ATGGAGCTTCTGATGATAATGATCATAAGACATATATTGTGTACATGGGTGACCCGCCAAAGGGTGGGCATGCATCTGTGTCATCCCTTCATACACGTATGCTTCATGGAGTTCTTGGAAGCAAGGCATCAACTTCTTTACTCTATAGTTATGGCAAGAGTTTTCAATGGATTCGCGGTGAAGTTAACTGAAGAGGAAAAGCATAGAGTAGCCAGATTGGATTGTGTAATTTCAATATTCCCAAACACAAAGAAACAACTCCATACAACAAGGTCATGGGACTTCATGGGTTTAACCCAAAACGTTAATAGAAACACCATTGAAAGTGACATTGTTATCGGAGTACTCGACACCGGAATCTGGCCGGAATCCGACAGCTTCACCGACAAAGGATTTGTT…
>F01_transcript_100448
ATGGAGTATCTTCCTGTTGAAGTTATTGGAAATATCCTATCTCGGCTTGGGGCTGCACGAGATGTTGTGATTGCATCAGCTACATGCCGTAAGTGGCGACAGGCTTGGCGTGATCACCTCCACACCCTTTCATTCAATTCCAATGATTGGCCAGTTTATCACGATATTACAACAAGTAGACTTGAAATTCTTATTACTCAAACAATTTTCCAAACCACTGGACTGCAGTGCCTTTCGATAATTATGGATGATGTTGACGAGTTCTCCGCTGCTCCTGTGATTGCTTGGCTCATGTATACCAGGGAAACCTTGCGCCAGTTGTGTTATAATGTAAGGACGACTCCGAACATTAATATTCTTGAGAAATGTGGTCGGCAGAAGCTGGAGGTGTTGGCCTTG…
>F01_transcript_100449
ATGATGAGTTTATGTACATTTGCATTCCCTGGGCAGTTTAACTTGGCAGTGGCTTCAGATCTTCGGAAACAATTTGGAGCAAATCTGTACTCTCAGCTTCCCCATAAGCTCAATCAGATTAGGAAAAAGTCAGGTGGGATTTGTGCAAATCTGTCGGAGACTGGGGAATACCACTCAAAGCGACCGCCAACGCCTCTTTTGGACACAATCAATTATCCTATTCACATGAAAAATTTGTCAGTCAAGGAATTGAAGCAACTGGCAGATGAACTGCGGTCGGATGTCATCTTCAATGTTTCCAAGACTGGGGGTCACCTTGGTTCAAGCCTTGGTGTTGTTGAGCTCACGGTAGCTCTTCATTACGTCTTTAATGCTCCTCAAGATAAGATTCTTTGGGAT…
>F01_transcript_100451
ATGACAGTTTCTCATCGTTATGACCAGTATAAAGATGTTTGGGATACAGAAGTCATTGTTGAGGTGTTTGTACTACTGCACTTGCAATCTCAAATGCCATCACAAATCTTGAGGGGTTTCGTGATTTGGAATTTTGTTATGTTGATCGTGGCATTGTTGTGGCTGATGGAGTTGATCATGATGCTTATCCATCTACTGTTTCTGGTGGGAGGCCTTCAGTGA
>F01_transcript_100452
ATGGGTTCAATCTCAGCCATAAATCAATTGTTAAAAGAATTCAACCAAATCACAACAAGAGATATAGCACCTGATAAGGAACCACTGGGATGGAGCACAAGACTGAAGATTGCTGTTGGTCCAGCTTGTGGCCTTGAGTATCTCCACTGTAAAGCAAGTCCACCTGTTATCTATTGTGATTTGAAGTCTTCGAATATATTTCTGGATAATGATTTCAATACAAAGCTCTTGGACTTTGGACTTGATAACTGGGACCTATTGGTGACAACACTCGTGTTTCAACACGAGTGA
>F01_transcript_100453
ATGTCAGTGAGATTCATAACCCACCAATCATTCTTCACCGCCGTCCAATCGGGAGACCTGAAATCGGTTAAAGAAATCATAAAGAATGAAGGGTCCGACCCGGATCATCCAGCTGCTGCTGCTTCGATCTCTGCTGGTCTGATGGAGTTACAGAATGATAAGGGCGAGACAACTCTGTATGTAGCTGCAGAGAACAACCATGAGGAAATATTTAGCTACTTGCTCAACTTCTGTCATCTTCAGATTGTCAAGATTAAGTGCAAAGTATCCGGTGTGGATGCATTTCATGTTGCAGCCAAACACGGCCACTTGGGGATTGTGAAGGAACTTTTGGGCATGTGGCCTGAGCTTTGTAAATCATGTGATTCCTCAAACACTAGCCCCCTGTATTCAGCTGCC…
>F01_transcript_100454
ATGGCCTTCTCTTCTTGTCTTTGCAACTCATCATTCTCACTCAAGATTGACCACTCAAGGTTGGCTAAGAAGCCTAAATGTAATATCAGAAAGGATCAGACCACTTTTGCTATTAAAGGTATGAACACTGACCTTTTTGGCCAACATGTCATGGGTATGCAATCAAAGATAAGCACAGAGTGGAGTTTCAAGGGAGGATCAAGAGCCATTAGTGGACCAACCATTAAAAGAGTTGTTCCTTACAGAAAAAGCTCCAGTGTGTTTGCTTCATGGTTGACAGGTCCTCAAATTGCAAGTACTGTCTTCACCTTGGCAACTGTTGCTGTTCTTCCATTCTACACCCTCATGGTTCTTGCTCCAAACGCCGAGCTGGTAAATTTTTCAATATGA
>F01_transcript_100456
ATGTCTCAAAAGAGCTTAGAAAAGCGATTCGGGCAATCTCCAGTTTTAATTGCTGCTACCTTTATGGAACAAGGGGGCATTCCTCCCACAACCAATCCTGCAACTCTGTTGAAAGAAGCAATCCATGTTATTAGCTGTGGATACGAGGACAAGACTGAATGGGGCAAAGAGGTGAATCTAATTATGAAAGTAACCAATCTATGTAAAACTTTTGATTCTTTTAAGTTTTGA
>F01_transcript_100457
ATGAAAAGCGAAGATGAAGATAAACGGGAGAATCAAAAAGACAATCCATGGCCGCAACCAAACAGAGCGTATGAAAATAATAGTAATAAACCTAAAAATGAAGAAGAGGACATGAAGCTATGGGGAATTTTAGTATTCGGTTTGATTGGAGCTACTGCTACTACTTTGGCTGTCGGGCGGTTGCGGAGAACAGTCGATTGGCTCTTTGGTCAGTCATCGTGTAAAGGAACAACAGGTGGTTCTTTCCGCACAAGTTTTCAGGAGGAAGCATGGAAGAAATATAATCGACGAATGCAGGAAGAGTATGAAGAAGAAATGGAGAGAGTGGAACGTATAAGACGTATGCAAAGTGTTTTCAACAGAGAGAGAAATAAATACAAAAGAAGCTATGAGAGCTGG…
>F01_transcript_10046
ATGGTCCAAGAAAAACCCAAACCTAAGAGGCTTTACCAGGTTTGGAGGGGAAACAATAGATTTTTCTGTGGGGGAAGATTGATCTTTGGTCCCGATGTGGCATCTTTGTTTCTGTCAACACTTCTAATTGCAGGCCCTGCGATAGCATTTTCTATAAAAATTTACGTGGATAAAATCAGACACCACAAAGATGCCGGTCATTGGTATCCTATACTAGTTGTGGGATTTTTTCTCACTATTCTGGATATTACATTTCTCTTCATGACATCCAGTAGAGATCCTGGAATAGTGCCTAGAAGCTCTAATCCTCCTGAGTCTGATGATGCCTATGATATAAATACCCCTTCTATGGAGTGGGTCAACGGTAGAACTCCTCATTTGAAATTACCTCGAACAAAG…
>F01_transcript_100461
ATGAGTCACCAGAGTGCTCTGAATACAAGTAAAGCTCTAGAGGGTGTTCATGGAGTTCATCTGGTGCCTCATTCGCCATTTGCTTTGGAAGAGATAAAGCAGCATGGGGACTTCCATCAGTCAAGGTGTGAAAGTTCAGCTGTTGGAGCTAGTCAGCTATTAATAGTGCAGAGAGTATGGCAGCAAAGGCCTTCATGTCTTAGGCCGATCAGGTGTTCTTTGCATGGTGATAGGAATCTTGCAGAAACGATTGCTAATGTGCTTACATCACTTCCTTTTGTTGCTCTTGGAATCAGGACCCCAAGAAAGAATCTCAACTGTAAGCTTTATGCTAATTCATTAATTGGAGTAGGAGTTGCATCAAGCTTATACCATGTTTCAAGAGGCAGATTGAGAAAA…
>F01_transcript_100462
ATGGAAACAAATTACGCAAAGGAATTGGATAGCCGCCATCAACTTATGGCTGAGCTGAAGAGAAAGCGGGTAGGCCAATTCCAAACTGGAGCCACCCACATGTCGTTACCACCGCAGTCCACCTTGAATACTTCCCTTCACAAGTTTAGAAAGCGGAGGAAGTTGGATGAATCAAAATTCCATTGTGGTCGGTGCACCTCACAACCTAAGAGGTCTTTACTGAAATATTATTCAAACTTTAAGAAAAGTGGGCTCCCACAGCGCTTGATGTGTTGTAGAAATGGTGAATGGACTGATTTTCCTCAAGAAGTTGTTTCTTTGGTTAAGAAAGACTTTCAAATAAAGAGAGCAGCCACTGAGGTTGAACTTGATGGTCATTTGTTTGTGATAGACTTTTTG…
>F01_transcript_100467
ATGGCTGGAGATGAAAGAAATAGAGAATTCAAGGTTGCAAATTTTATACGGACAGATCTGTTGCAAAAATTCATCTCAAGAAACAATATTCCAGGCAAATTGGAAAATAAAATCCCAATTGAGGAAGACGAAGAAGAAGAAGAAGAGATAGAACTTAGTCTCGGGCTGTCGTTAAACGGTAGATTTGGGGTTGACCCGGAAAGAGCTAAGGAGATAGTTCGGGCCTCTTCGATATCAAACTTTATGATCATTTCCGGTGAAAAGGACTCAAAAAGTTGGAGTCCTTACGACGCGGCTTTGACGAGGACTTGTTCTTTACCGACGGAGACAGAGGAGGAATGGAGAAAGAGAAAGGAGTTGCAGTCACTGAGGCGTATGGAGGTGAAGAGAAAGAGATCT…
>F01_transcript_10047
ATGTTTTGCATTTGTGGTGGGAGTGCGTATCCGAGGGATTGGGATTACAAGAGGTTTAGGGCTGTTGCAGATAAATGTGGCGCTCTTTTGCTCTGTGATATGGCTCATATCAGTGGCCTTGTTGCTGCTCAGAATTTCATGAAGGACTGCATGGGCGTGCCCTTACTGATGGAGCCAAACTTCAGTGATTATAGCTGCCAGACGGACAAGTCCAGCATAGTTGATGAAGCAATAAATTACACCCAAACCCTTGAACAAACTCTCAAGACACTACAAAAACAAAGGCTAGACAAAATCCGGAGTCCAACAATTGTAGACTTGGAGCTGCCGCCATTGACGATTGCATCTGATCAGCCACAATCATATTTGGCTAATCCAGCAGCATCATCAAGAAAATCG…
>F01_transcript_100471
ATGAAGTGGAATTTCCAAATTAATCTTTGTGTGGAACAGGTCCCTGAGACACTAACAGATGAGGTGCTTGGGAAAATGAGTGCACCTCTAAAGAGTGATGTACCACACATTACACCTGCTGAACTTGCTGAGGCTGATGGGTTTGTTTTTGGCTTTCCCACGAGGTTTGGAATGATGGCTGCTCAATTCAAAGCATTTCTTGACTCAACTGGAGGGCTATGGAGAACGCAGCAGCTTGCAGGCAAGCCTGCTGGAATCTTCTATAGCACAGGATCCCAAGGGGGTGGGCAAGAAACTACTGCTTTGACTGCCATTACTCAGCTTGTTCACCATGGGATGATCTTTGTACCCATTGGATACACATTTGGTGCCGGCATGTTTGAAATGGAGAAAGTGAAA…
>F01_transcript_100473
ATGACGGAGGTGATGCTCCACATATACGACGTGACGAATAGTGGTTCAGATAAGACTAACAGTACAATTGTTCAGATCAACAAGATCTTCAAAGACGGTATCGGTCTTGGTGGCATTTTCCACAGCGCCGTCCAGGTTTATGGAGACGACGAGTGGTCATTTGGGTATTGTGAACAAGGCACTGGAGTTTTTAGTTGCCCTTCTGGAAAGAATCCTATGTATACCTATCGGGAATGCATTGTACTTGGTAAAACAAACTTTTCTATCTTCAAGGTCAATCAGATTTTGAGGGAACTCAGTAGAGAGTGGCCTGGGCACTCTTATGACTTGCTATCAAAAAACTGCAATCACTTTTGTGACGAATTTTGTGAAATACTTGGTGTTCCTAAACTTCCTGGT…
>F01_transcript_100478
ATGATGCTAAAGATACAAAAAATTCCTGCGGAGGTCTTACGATATTACTTGCTAACTAACAGGCCTGAGGCATCAGACACACTATTCACATGGAAGGACTTGCAGGAAAAATTAAACACCGAGTTGCTGAATAATTTGGGCAATTATGTTAATCGGGTCTTGTCATTCATCGCTAAACCCCAAGGTACTAAAGCAACTCAACTTGCCTCCTGA
>F01_transcript_100481
ATGGAGTCTGTGATTGAGAGATCAGTTTGCAGTGGCCTAGGCTGTTCAATGGCAACCAGTCAAGATGTGCAGTCTCTTCGAGTATTCACAGCAACATGGAATGTAGGAGGAAAATCTCCTCACAATGGCCTCAATCTCGATAATTTTCTTCAGATCCATGACCAATCAGATATATATGTTCTGGGTTTTCAGGAGATAGTCCCGCTGAATGCTGGAAATGTGTTAGCTATAGATGATAATGGGACTGCAGCAAAATGGCTGTCTCTAATCAGTCGATCTCTGAATAAATCGCCAAATGACTATACGAATAACATGACAAATTCCACTGTCAATTCAAATCCTTCAAGTGCGGGAAGTTTAAAGCCTGTTACAGTGACCAGTGGTTCACTGTTCTCTCTA…
>F01_transcript_100483
ATGGTGGACTGCTCCAGGTCATCTCACCACCGGCGAGCCCAATCGGAACTTAACTTCTGCCTGCCGGAACACCTAGATCTGGCCTCCGACCCCTTCGATGCGCCTTCTGGGAGTTTCGAAGACCTCGGATCGGAAGACGATCTCTTTTGCACTTTCATGGACATGGAGAAGCTCGGAGGCGGTGGCGGTGGCAGATCCAATTTGATGAACCTCCACGAAAGTAGCAGCTTCAGCTTAGAAAACAATGTGAATACCGGCGGAGAGGGAGAAAAAAGCAGCGGCGGCGGCGGCATCACGAGGCCTCGACATCGGCACTGTAATTCAATGGATAGTTCGACTAGTCTTTTCAATAGTAGCAGTAATAATAGTGAAAGTATTAAGGCTAAGAAAACTATGGCT…
>F01_transcript_100484
ATGAAGCAGGGAATTGACAGGTTGGGATTTGTAATTGATTTTCTATCGAAGGTAACTCTTGTTGGGTTCATGGCTAGTGCAGCAGTCATTGTATCATTGCAACAACTGAAAGGACTGCTTGGGATAGTTCACTTCACTAACAAGATGCAAATAGTCCCTGTGATATCCTCTATTTTTAAGCAGAAAGATGAGATTTTGCAGTGGTCTTGGCAAACCATTGTTATGGGAGTTGGTTTTCTGGTCTTTCTACTGACCACAAGGACAATTCAGGTACTCCATTATTATCGGTTATATTCTCAACTCTTTTAG
>F01_transcript_100485
ATGGCCTCTCTAATGGCGATACGCCGAACACGGCCCTCCATTTTTACATCTTCTTTTTCTTCTGTCAAGGTACGTTCTTCTGATCATCACTCTTCTCTTTTCATTTTCAATAATGGAAACTCCCAAAACCTATCCCCAAGGCCCTTATCTTCCTTTTCCAATCTTATCCACCTTCCGATGAGAACCCTAACCACCACCACCGCCGCTTCCTCTGCTGCCGTTCCAAACGAGGAATTCCCACCGTCTCCACAATCCCATTTCGATTATAGAAACCCTAATCAGTGGGCCAACCAAACTCCGCCGCCTAATCAGTGGAATAACCAAAATCCGAACTTCTGTAGTTCTAATCAAATGAATAATCAATATCAGGGAAATCCTTCCAATTTAGGTCAGGGATAT…
>F01_transcript_100486
ATGGAGCAGCATGTGTTCACACGAGTACTAGATCTAAACGAGACATTAATATACTCTGATTGGAAGCGTGACAGAGGCTGGCGAACATTCAAAAGACCTGGCGTTGATGCCTTCTTGGAACATCTAGCCCAATTTTATGAGATCATAGTGTATTCTGACCAGCTGAGTATGTATGTAGATCCTTCTGTTGATAGATTGGACCCTAAGCATTGCATAAGGTATAGGCTATCAAGAGCTGCAACTAAATATCAAGACCAGAAGCATTATCGAGATTTCTCAATGCTGAATAGAGATCCGTCGAGGATTCTTTATGTGAGTGGTAATGCACTAGAAACTAGCCTTCAGCCAGAAAATTCTGTACCAATAAAGCAATGGAAGGGTGAAGCAGAAGATACAGCA…
>F01_transcript_100487
ATGTCCTGCTTTAGTGAAAGATATGTTGCTAATTTATTTTTGAGGATTTGGAAAAAAGAGGGATGCCAAAATTTTATAGAAGTGTGCCTTTTTTTTTCTATTTTATGGGGAATTTGGAATGAGCATAATGTTAAACTGTTTAGAGGAAGTTACTCTTTTTTTGTGTTGTTGAATGATGGGATTATTTTTCTTTCTTCTCTTCTGGCTTCTTCTATGGGGGCCTTTAGAGGTATCTATCTGACTGATTTATGTAAAAATTTGAGGGTTGCACTTGTTTAA
>F01_transcript_100488
ATGAAAAGTAATCCTGAATTTTCTAATGTGAAAGGGATTGATGAATTTGCTCAAAAGTTGGTTAAGAAGAATAAGGCTGATTTTTATCCTCGAGTTTATTTGACGTTGAAATTGGCTTTGATTTTGCCGGTTGCTATTGCCTTGGTGGAGAGGATATTTTCAGCAATGAATATTATTAAAACCACTCTCCGAAACCAAATGGGCGATAAATGA
>F01_transcript_100489
ATGCTCGATGCAGGGAGCGATGAAAACTTGGCACTTGACAGGCCAACAACTCCATCCCATGAAGACCCTCGTGCTATGGGACTAAGGCAAGGCAGCAGGTTCCGTGGCCACATGGAGCCAACCTCGCCAAGTCACACTACAACTTTATTCATGCTTAGGTAG
>F01_transcript_10049
ATGGGCTGCGTTTTCGGAAAAAGAGCCGCCAGAGATGGCACACGCCGGAGATCCTTTGGTGACCCTTTACCTCGCCGGAGCTCCAAACAGACGTCGTCTAACGATGACAGGATTAAAAAGAACGAAGTTGAAGAGGAGGATAGAGACAAGATTCGGCACAAAGGTTATTTGCCTGCGACGGAACCGTTTAGACCGATGCCGGAGTTTCGATTTAACAGATGCCAAGGGTGGCCGTCGTGGCTGTGCACCGTCGCTGGTGACGTCATCAAAGATTGGACTCCTCGCCGTGCTAACACGTTTGAGAAACTCGATAAGATAGGTCAAGGGACATATAGCAATGTATATAAAGCAAGAGACCTGATAACAGGGAAGATAGTGGCATTGAAGAAGGTTAGATTT…
>F01_transcript_100492
ATGACAGGTGGTGTAGTTGATATTGGCGATGGGGCTGCTCATGTTGTGCCTGTTGCAGATGGTTATGTTATTGGTAGCAGCATTAAGTTGATTCTCATTTCTAGGAATGATGTAACTCTCTTCACCCAGCAACTCATGTGGGTAATTTGTCTTTGA
>F01_transcript_100494
ATGCTACATTTGTACAAGAACAGATTGCAAAACTATGCTCAAAAGAGAAATCTTGCTCTACCAGAGTATTCATCTGAGATTGTCGGACTTCCTCATTCCCGTCTCTTCAAGGCAAAGGTGACAGTCGATGGAAAAACTTTTGAGACATCAGAATTTTTTGCTACACTAAAGCACGCAGAAAATGCAGCAGCAAAAGTTGCGGTTGAGTCAATCTCACTTCACAGAACTCAAGAGGACGAAGTATTGTATAAAAATCTATTACAAGAACTCACTCAAAAAGGGGGTCTCCGCTTGCCAGCTTATGAAACAAAGAAATATGATCCACCTCACATGCCAACATTTATATCGACTGTGGAAATTAGAGGTGAGAGGTTCCAAGGACACGAAGCTAAAACCAAA…
>F01_transcript_100495
ATGGACTCTTCATCACCGCCACAATCAACCACCGTCGCCGATGATTCCCTCGGCGTTAACGCACCGATGGTGGATCCCTTCTTGGTCGAGGCTCTCCAAAACCCTCGTCATCGTTTCACCATTCTGCGAATGGAACTCGATATTCAAAAGTTTTTACAGAATTCTGATCAACAACAGTTTGAGTTCCAACATTTCCCAACTTCTTACCTTCGTCTTGCAGCACACCGAGTTGCTCAACACTATGGTCTGCCAACTATGGTTCAGGATAATTTGGTTGATGGCCAGGGAACCAGAATTGTGGTCAGAAAAATAGCTGAAAGTATTTACCCTTCTATTTGTTTGTTGGAGATACCAGTTAAACAGTCTGAAAATGACAAGCTTGAGCAGAAAAAAATTGTC…
>F01_transcript_100496
ATGGCTGGAAAGAAAAGAAAAAGGAAAGTGAGGCTATTAGCTGAAGCATTCACGGATGATCAGAGATCAGCCGAGGAATTGAAAGAACCAGAGGAGCAACAGATATGGTCAAAGCTTCCAACAGAGCTCCTGGAATCAATCGTGTCCTTGTTAACTTTGAAGGAAAATATTCGCATTTCTGCTGTTTGCAAGAAATGGCTCTCTGTTGCTATCTCAGTTCGGGTGGTCAACAAAGCCCCATGGATTATGCATTTCCCCAAATATGGTGACTTGTTTGAATTCTATGACCCTTCACAGCGCAAGACTCATTCCGTTGAGTTTCCAGAGTTGCAAGGCTGTAGGGTTTGTTACACCAAGGATAATTGGTTACTGCTTTACAAGCCCAGAACTCAGCGTGTG…
>F01_transcript_100497
ATGGAAGAACCTGGATCTGGTGCTGTAGCAACTATTGAGAATAATAACGTATCTGTTGGTACGCTAGACTGGGTCCAAAGGCATGGAGTAGATACAAATCCATTTGAAGAAACTGAGGAGTTTAAGAATCAATCAGTTGTTTATGTAGGAGTAAATGGTGCTCTTGCGGGTCTTATCTATGTTGAGGATCAAATCAGAGAAGATGCTGCACAAGTTGTTAAATCTTTGTCTAGACAAGGGATAAAAGTATACTTGTTGTCTGGGGACAAAAAGAGTTCTGCCGAGTATGTTGCATCTGTTGTTGGGATTCCAAATGAAAAGGTCTTTTATGGCATCAAACCAGATGAAAAGAAGAAATTTATAAGTGGACTTCAGAAGGATCAGAACATTGTAGCCATG…
>F01_transcript_100498
ATGGGGTTGTCTTTCACAAAGCTGTTCAGCAGGCTTTTTGCGAAGAAAGAGATGCGCATTCTGATGGTAGGTCTTGATGCTGCTGGTAAGACTACCATTTTGTACAAACTCAAGCTTGGAGAAATTGTCACAACAATCCCTACTATAGGATTTAATGTTGAGACTGTGGAATACAAGAACATTAGCTTCACTGTTTGGGATGTTGGTGGTCAGGATAAGATCCGTCCACTGTGGAGGCACTACTTCCAGAATACACAAGGTCTTATCTTTGTGGTGGATAGCAATGACAGAGAGAGAGTTGTTGAGGCAAGGGATGAGTTGCATAGGATGTTGAATGAGGATGAACTCAGAGATGCTGTTTTGCTCGTCTTTGCTAACAAACAAGATTTGCCCAATGCA…
>F01_transcript_100499
ATGCCTTCCAAACGACGTGGCGAAGGCTCAAGCACCGCCTCGGCTCCGCCCAGATTTCATAGCCGCCGTTTTATTAGTGCCGCGGCTCAAGAATGCTATAACCGCATGGCTACCCGCTCACTAGTCCCCGAACGTGGTTTGAGGCATGATCAAACCAAGGATGGAGAAATAGCAGTGATGATTGCTGAAAGAAACTGGTTCTCCCTCACTGAACAACCTGACCCCGCAGTGATTGCAGTCGTGAAAGAATTCTATGCCAACGTTTCAGAACATGATCACTATGAAGTGTTTGTCAGGGGAAAAACCATGGCAATCGGAGAAGAGGACATCAATGGGTGTTACCAACTGAATTTGGAAGAGGTTAACGATGAGTATGCCGGTCTTCTGAGCCAAGGTCCA…
>F01_transcript_10050
ATGGCGTCTGCGGGCATAGGACATGGGAAAGTAGGCAGTTCGAGAACTGTTAATGGCTTCAATGAGTCGTCCAGTTCAGTTGACTGGCTGGGCAGGGAGATGCTTGAAATGAGATTAAGGGATAAGGTGGACCATGACGATGAGAGAGACAGTGAACCCGATGTAGTTAATGGCGTGGGGGCTGAAGCAGGACACATGATAAGAACTACCATTGGCGGTCGAAATGGTCAATCTAGACAGGCTGTCAGTTACATAGCAGAGCATGTAGTTGGAACGGGTTCCTTTGGTGTAGTTTGCCAAGCAAAATGCAGAGAGACTGGCGAGATCCTCGCTATTAAGAAGGTTCTTCAAGACAAGCGCTACAAGAATAGAGAGTTGCAGATTATGCAAATGTTGGAC…
>F01_transcript_100501
ATGGGTCTGCATAGAGCAGAGGGCTGGAGTCTGGCAACTGTAATAGTTCAGATTTCCTTGTGTAATGGATTACTTCAAAAAATGTTGGATCACCAAGTTTTTGTGGTTATTGAGATAGTAACACAAGCGTTTAGAACTGTAAACAAAAGTATATATCTCTTAAATGTTTATTTATTTACTTTTTTATTTGCATTTTCCCCTTAA
>F01_transcript_100505
ATGCATGGAAGAGATCATGAGATTTCTAGTGACCATCCATTATATGCACATCCAAATATTAGAATTGGAAATGCTGAAGAGTGGGAAGGTATATCTATTTTATCACAAAATAATAGTAACTCAAAGGCTCCATCTCATCATAAGATCCTGGAAGGAAAACACTTGATGAAATCTATTGCTGGGCGTTTGGAGAAGCTCTTCAATAAGTTTGAGGATAGTGCAACAATTGATGATTCATCTGAGATGTCCACTAGTCTGTCTGACTACGAGGATTGCATAGAGGAGCCTCTCACCAGTTGTAGCTTCGATGAATCCATGGAAATGTTGCAGTTATTGAACAATGAACGAGAAATGCCAGAGAACCTGCAGGGAGGTGTTCTTGTTGATCAGACATATTTT…
>F01_transcript_100506
ATGAACGTCTTCTTAAAACATGCAGAGGTACTGGAACGGATAATAGAGTCGGTTAATCTGAGTGTTAATGTAACATATGATATTCCTGAAACTTCACGAGTACAGACTAACAATTCAATCACACCTGAAGGTTATTCTCCTAAGATAAGTGAGTGGCGAAGTAAAGTTGTGGAAGGAATGTTTGAGGATCTTCGTGAGATGGACACGGCTTGCATAGAAGATTCTCACCTTGCAACTTTTGCTAATCTCAGGGGTCACTTGGGTATGAAACTAAGTCAAAATGGTCCACCTTCCTCAACTGGAAGCATGACATCAGCATCCTCCACAAATACCCCTAGATCAGGAGCTTTCGACATTTTCTGGATAGAGCATAAGAATCCTTCTGAGCTAGAGGAGGTG…
>F01_transcript_100509
ATGGCCACCGACGGAAATGGCAAAGTTCAAAGCCCTAATGCTGTTGAGGGGAAAAAGAGAAAGAGAATCAAAGAGAAAGATGAAGTATCTGATATTAAGAGAAATGTCGAGCTCACAATCGGAGTACCAGAGTTCGGGGATGCTGTCGAGGGGGCAATTACTTCATCTTTTTAA
>F01_transcript_10051
ATGCATCATCAACTTGGTGATGATGGAAAAAATTATCTTTTGCCCAATGAACTTTTGTCTGTTGGAGTACTTAGAAGTGCCAATTCAATGTCTGTCATTGAGAGCTCTATGAATAAGAATAAAATTATTGGTACCGAGACACGAACCTCTGATTTTCCAAGCAGGCATAATTCTGAAGCAAGTTCCTTTTCAAAGAATTTAAACAGAAATGACAATCCCAACTATTTTCAAGACCAGGAGGTTATGGAACTTTATTCACGGGTCAAAGCGCAAAAGGATGAAATTATGTCTCTTCGTGAACAAATTGGTGGCGCCAGTGTGAGGGAATTGAAGCTGTTGAATGAGAAATATACTTTGGAAATGAAATTTGTAGATCTGCGAATGGCTCTAGATGAGAAG…
>F01_transcript_100515
ATGTATATTCTTTGCTTTCATATGAGATCAATGATGGGCATTCCTCGTCTTAAATCACAGCTCTTTCGTTTGCCTATAGAGGCAATTTTAAAGCATTCATTAAACCCTTTAAAGGTATGCTTGCCATCGATAGTACATGAATTCATGCAGCAGGCAAAAGTATCCCGGCTATTCTCTAAGAAAGGTTGGGAAATTGATATACATAGTTGTAGCCTTAGAATACCATGTTAA
>F01_transcript_100516
ATGGAGAACAAGTCCAATACTTCATCTAGTCCCAATTTTCCGGAAGATTTGGAGTACCTGCCCGGATTCGGTAACCACTTCTCATCGGAGGCGATCGCCGGAGCTCTCCCAAAGGGTCAGAACAGCCCTCTTGTCTGTCCATTTGGTCTCTACGCCGAGCAAATCTCCGGCACCTCGTTTACCGCTCCTCGCAAGATCAATCAGCGAAGTTGGTTGTACCGGATCAAGCCATCGGTTACTCATGAACCGTTTAAACCTAGAGTTCCGAATCACGGGAAGCTTGTGAGTGAATTTAATCAGTCCAACAGTTCTGCTACTCCAACTCAACTGCGGTGGAAACCTGTTGAGATTCCCGATGCACCCACTGATTTTATTGATGGAATGTACACTGTTTGTGGA…
>F01_transcript_100517
ATGGTGATGGTACGGACACGAATCTTGTTCAACTCGGTTCGATTTGCTCCCAGTAACAGTCAATGGCACCTGAATTCGTCACAACACCGTTGGATCTCCTCCACGACGCGTCTCAGTGATTCATGGATGGACAAGATCAAAGGGGTATTCACCGGACAAAAACCCACTTCTAATCAAGATCCTTCTCAATCCATCACCGCCGAGTCATTCACACTCCCTCAGTTTGCGGATGGATTGAAGAATGCAAAAACATTAGGGACATTCAAGCAGTATATGGTGGGCAGAAGCAGTGAAGCAACTTTTGCTGATGCATTCGAGAAGCAGGAGGCTGTTCTTCGCTATCTTGGAGGTTTAGATCCTACTGGAGAGAATCTTCAAAATTATCAAAAGCAAGAAGCA…
>F01_transcript_100519
ATGGATTCACCTGATTCACCAATGGAAAGTAAGAGAGAAATAGCTCTTACAACACGTCAACGAGCCCTTCTGTCCGGGAAGGATGCCTCTTCTATGTCTGCAGCAAATTCAATTGAGTTCCCAAATGGGTTACCACCGCCTCCACCTCGAAAGCAAAAGGAGAAACTCACAGAAATGGAGCAGCAGTTGAAGAAAGCTGAGGCTGCCGAGAGACGTAGAATTCAAAATGAGAAGGCAGCTCGGGAGTCAGAGGCCGAGGCAATCAGAAAAATATTAGGTCAGGATTCCAGGAAAAAGCGGGAAGATAAATTGAAGAAGCGTCAGGAAGAGTTAGCTCAGGAGAAGGCTGCCAATGCACATACGATTCCTCCAAACACTATTAGATGTGTCATGGGCCCA…
>F01_transcript_10052
ATGGATCCTGCAGCACAAAACCGCTCAATCTCTATCAAACTGTGGCCCCCTAGCCAAAGTACCAGGTTAATGCTTGTGGAGCGAATGACCAAGAATCTTACTACTCCATCTATTTTATCTAGGAAATATGGCCTTCTTAGTAAAGAAGAAGCTGAGGAAAATGCCAAGAAAATAGAAGCACTTGCTTATGTGTCTGCAAACCAACACTTTGAGAAGGAGCCAGATGGTGATGGAAGTTCCGCAGTGCAACTTTATGCTAAAGAATCCAGTAAGCTTATGCTGGAAGCTGTCAAAAAAGGCCCAAAATCAAAGGAGGATGGAGAAGTAAACATATCTGAGGAAGTTACTGCATCTCTCGAAACTGTATTTGATATATCTGAAGGTCGCCGAGCCTTTATT…
>F01_transcript_100521
ATGGAGAAAGGAGCAAAAGAAGAATTTTGGGTGGAAGAGTTCAGAGAGCAACAGCCCATTCCTTTGAAATCGAAGAGAAAAGTCAAACCAAAGAAAATAGAGTTTGACGGATGGGGATCAAAACCTCTTATTGAATTTTTGAAAGCGATTGGTAAAGAATCCGGAAAACAGCTCACTCAATCTGAGTTGACAGCCATTGTGAATGAGTATGTGAATAAAAATAACCTTCTTCACCCAGTAAAAAAGAAGAGAGTTGTGTGTGATAAGAGGCTTCACTATCTGTTCCGAAAAAAGTGGGTGCCTCGAATAAAAATTTCAGACTTTCTGGAACCACACCTTGCTGAAAACCATGATGAATCTGAGGATGAACATTTAAGCAGTTCTGGAGAGGAGGAAAAT…
>F01_transcript_100524
ATGGAGATCACAAAAGTGTACCCACTAGATGCAGTTTTTGACAGTCCCGAGGATGTTCCTGAAGATATAAAAATAAACAAACGTTATGCAGGGTCTTCAAAGTGGACAGTTAAGGAAGTTACTGAATCTGTGAAGCAGGATTTTGGCAGCATTGACATTCTGGTCCACTCACTTGCAAATGGACCTGAGGTTACCAAACCGCTCTTGGAGACATCAAGGAACGGATATCTTGCCGCCATCTCTGCTTCTAGTTATTCCTTTGTTTCTTTACTCAAGCATTTCGTTCCAATAATGAATCCAGGTGGTGCTTCTATTTCTCTAACCTACATTGCATCTGAAAGGATCATACCAGGATATGGTGGAGGCATGAGTTCAGCAAAGTCTGCTTTGGAGAGTGAC…
>F01_transcript_100525
ATGCAAATGTTCGAAGACGTTGATCTTATCATATTCTGTGTTTCCATGACGGACTACGATCAATTCTCTTATGATGTTAACAATGGAGTTTCGACAAACAAAATGCTGGAAAGCAAGAAACTCTTCGAGACAATCGTGACCCATCCAGTCTTTGCTCAAAAGGACTTTCTTCTGATACTCACCAAATTCGATCTGTTGGAAGATAAGATTGAACAGGTTCCTCTCACGCAGTGTGAGTGGTTTCACGACTACAATCCAGCGTTTAATGTTAATGAGAAGAGCAGCAGTAACAAGAAACACAGAGCTACATTAGCTCAACATGCATTCCATTATATTGCAGACAAGTTTAAAAGACTGTTCTACTCCCTAACCAAAAATAAATTGTATGTTTCGCGGGTT…
>F01_transcript_100527
ATGACAGGGAGGGGAAACATGGGGCGAGCATCCCCCTTACTTTTAGTTCTACTGGCACTAGGGTTTTTCTTTGCTACGTATAATTTGATAACGGTGGTAATTCACCACAAAAATGTATCGGGGAGATGGGTTTCGGATGGGTTGGAATGGTTTGATCCTATTAGTGGGTTGCCTCAGGACGAGATGAAGAAATTTACAAAATCAAATGTGCAATTCCATGTTGCTCTCACGGCAACTGATGCGGCATATAGCAAATGGCAATGTCGGATTATGTATTATTGGTATAAGAAGGTTAGAGATATGCCTGGATCAAGTATGGGAGGGTTTACGCGGATTTTGCATTCGGGGAGTCCTGACAACTTGATGGAGGAGATTCCAACTGTTGTGGTTGATCCTCTT…
>F01_transcript_100531
ATGCAATCCCAAATGGTTCTATGTTTCAGAATGACACAGTTACAAAGCTTGAGAGAGATGTTGAAGAGTCTAAAATTTCTCCTACAACTTTCCGCACCAAGTTGCATTGCTTTGGAGCTTTTTCTTATTAAAAGAAAGATAAAAGGACCTTCCTGGCTATCAGTTTCAAAATTCTCTAGCTGTCCAGCTCCTCAGCGTGTAAGCTGGTGCAAGTTTGAGGTTATTGTTGATTTATCCAAGAACATTCAAGTTTCAAATTCCTCAAAGAGTATTGCAGAGATTCCTCTAGTGGTTGTTACAACAATAAATCTGAAAACTGTCATAAATGAAAAGCAAGTATATGAAATTGTCTCTGCATCTGTCATATGCTGTCACAAGGCGAAGGTAAAGTGTGCTTAA
>F01_transcript_100533
ATGGAAGGACCTGCACTGGACCTTTTCAAAGCCAAGTTGGAGGCTGTTATGGCTGAAGCTAGATCTCAGCAGGCTGCATCTATGACAGAATTCAATTGGCTAGGACATCGGTTTCCAATTTCAAATGCGAAGACGCGGGTTTCCATATTGAAAGCTCAGGAGCTGGAGAAAGATCTTCATGGTCCAACAGCAGACTCTCTTCCCGCAGAAAAAAGACTGGTCATGTTTGACAAAATATTTGCGGCATATCATGAAGCAAGGAGCAGCATTCGTAATGACTTGGCCACTGCAGGTAACTCTGAAAACATGAAAGATGATCTAAGTGGTCTTGATAAAGCAATTGGTGCTGTATTGGGACAACAAACTATTGAGCGGAACCAGTTGTTAGTAAGCATAGCG…
>F01_transcript_100536
ATGCTGCTTGGGTTCATATCTCTCCTCCTTACAGCTACCTCAAGCATTATATCCAATATTTGCATCTCATCAAAGTTCTATGATAATGCATTTGCTCCATGCACCAGGTATGAAGTTGAGGAGGACAATGAGGATAATGCTTCCCAGGAGCGTAAACTTTTGATGGCTTTTGTTCTTCCTCACTCATCTAATAGAGTGTTGAATACCCTAAATCATAATACTTGCAAAAAGGATTATGAGCCATTTGTATCATATGAAGGACTTAAGCAACTGCACCGGTTCATCTTTGTTATGGCAATTACACATATATCTTACAGCTGTTTAACAATGCTGCTGACAATTGTGAAGTCAGGAGTTAATGAAGGCGGTGTACATCTGGAAGAGTTAAATATTCTATTA…
>F01_transcript_100537
ATGGAATTGCATATGATGTTTTTTATTTTGGGGGCAGAATACTACAGCAGTGAAATACTGAGTGCTGATGATACACAACTTGGTTCAGTGATAACAGATATAATTTTGGACAAGGACTTGAAGTCATTCACACTAAGTAATGGATGGGTATTACCTAGAAAAATATATTTCAATGGTGACAACTGTGAGATGGCTCTTCCAGACTCTTTTCCAATGCTGCCAAATGGTAGCTCAAAACAAAAATCCGCTAATAGCTAG
>F01_transcript_100538
ATGCACTCAGCAACCTTAACATCATCACAACCACCAATTGCCATTTCATCTTCAAACTTCACAACACCTTCAAAATGCTTTCCTCAAATTCGATTAAACCACAGAAAAAGATACCCAATTAAACTATTACCCATATCTCTTAAATGTACTCAATCCCCTTTTCCAAAATCATATGATTATGATTATAGCCAAACAATTATAAGCCCTATTCAAACTTCTTCGAAAAATGTTACCCAGAAACTTCAGTATTTGGTTACAGAGTTTAAGTCTTTAACCCAGCCGATTGATCGAGTGAAACGCTTATTAGACTACGCAACTCGTCTTCCTTTCTTTGACGAGTCGGCTCGGTCAAAAGAAAACCGAGTCACGGGTTGTACGGCTCAGTTGTGGCTGGAGGTT…
>F01_transcript_100539
ATGGCGAAGCGGAAGGAACGAATTCTCAAAGAGCTTTATAATGCGACCGTGATAATTAAGGAGCCGGAGATCACCCCAGTCTTGAATGGTAGCTATCGAATGCAAGGGCCAGTTGATGAAACAGACTGCGACTATCAGACTAATACGGTATCATCTCGAGTTAATAAAGGAGTTAGTAGGCATACCAATAGTCAAAAGAGTGATGTGAGAGCAGACTCTGGGACGTGTAACGTGTGCTCTGCTCCTTGTTCATCTTGTTTGCATATTAACCAAGCTCTCATGGGGTTGAAGCATGGGGAATCTTTGGATGGAACCTCTAGAGAAAATGTTTTTAGTTGTTCTGTTAATGACGCAGTACCAACCGTTAAGAGCAGAAAATGTGAAATTGGGCAGCATACT…
>F01_transcript_100544
ATGACTAAGAGAACCAAGAAGGCTGGTATTGTTGGAAAGTATGGTACCCGTTATGGTGCCAGTCTCCGTAAGCAGATTAAGAAGATGGAGGTTTCACAGCACAGTAGATATTTCTGTGAATTTTGCGGGAAGTATGCAGTGAAGAGGAAGGCTGTGGGAATTTGGGGGTGTAAAGATTGTGGGAAGGTCAAAGCAGGCGGTGCTTATACATTGAACACTGCTGCTGCTGTGACTGTTAGGAGCACCATCCGTAGGCTAAGGGAGCAAACAGAGAGTTAA
>F01_transcript_100547
ATGGAGAGAAACAAAGAAGAGGCCGTCAAGGCCAAAGGAATTGCAGAGAAGAAGATGGAAGCCAGGGACTTTGTGGGGGCTCGGAATATTGCACTTGTGGCGCAGCGACTCTATCCTGATTTGGAGAACATTTCCCAGTTAATTATGGTTTGTAATGTCCATTGCTCTGCTGAGCACAAGGTCTATGGAAATGAGAAGGACTGGTATGGTATCCTTCAAATTGCCCCAACAGCTGATGAGGCTTCAGTTAAGAAGCAATTCCGAAAGTTTGCTCTCCTTCTTCATCCTGATAAGAACAAATTTGCCGGAGCTGCAGATGCCTTTAAGTTGATTGGTGAAGCTCAAAGAGTACTTTTGGACCGTGAAAAAAGGATGTTGCACGACATCAAATGTAAATCT…
>F01_transcript_100550
ATGGAATTCCATTCAGAAATGAAAGACGACCATGAACCCGGGTCCGGATCGGAGCCCAATAACATAGCTGCACTTGAAGGGGGTCATTATGTTCCTTACACTAACTTTCCATTTAGTAATGACCCTTCTTCTGCTAATAACACGACTCCATCTCCATCTCCACCTCCACCTCCACTTCCTCATATTAGTACGTTTGAAGCACCGTCGTTTAGGGTGGTTGAAGTGCCGAAAGGCGATGACACCGGAATTTATATAACGTGGAAGGACTTGTGGGTGACGGTGCCGGGAAAGAAAGGGGGTCGCCGGCCGATTTTGCAGGGGCTTACTGGGTATGTGGAGCCGGGTCAATCGTTGGCTATTATGGGGCCTTCTGGCTGTGGCAAGTCTACTCTTCTTGAT…
>F01_transcript_100552
ATGGTGCCGAATAAAGTACGCAGTTTGCAAGATATCCCAAAAGAGATAATCCGATTAATATTGTTTTGCCTCCCCATGAAATCTTTGTTAAATTTGAGGTGTGTCAGCAAATCATGGTGTTCCTTTGTTAACTTGCACCTCAAACGCCGCATAGTATTCCTCCCTTTTTCGAAGGAACGGTTGGTAAACAATGAAGTGCGGTTCTTATCATCCGATGATGGTTGTGCTCCAGTAGAGAAGCTGAGTCTTGATGATTCTTTGTTGAATGAATTTAATTATTCAGCCAGAATTTTTGGTTTTTGCAATGGCTTTATCTGTCTGATTCTGGACATGGATCGATTGGCGCTGTGGAATCCTTCCACTAGTGAATTCAAGATATTACCAAAACCGAGTAATGTC…
>F01_transcript_100557
ATGGTTCAAAGTACAGGGGATGCAAATGCTGAGTACTTGTGTAGTTTAGTACTTGGAGGGGAGGGTGAAAACAGATCGGAGCGACATGAAAAAAAGCAACTAGATGAGCACAGGAAATGGCTTGCCTCGTCACGCTGGGCTGCTGCTGCCGCGTTCGCTCTAGCTGTTAGCCTCACTTCGTCACAAAATGACCTTGTCCAGTTGGAACTTCAAGAAGGTGATAACAGTATCCTCAAGAAAACAAAGGATGCAGTTGTAACTCTTCAGGGGGTTTTGGAAGGGAAGCATGACAAAGTTATTGAAGAGACACTTGATCAGTACCATGTTCCCAGAGATAGATGGTGGTCGGCTCTCTACAAAATGGTTGAAGGTCTTTCAATGGTGAGTAGGCTGGATCAA…
>F01_transcript_100558
ATGTTCATTAAATCTTTTTGGTGCATTAGCTACCGTGTTGCTACTGTTAGCTTGCAAAGTTTGTGGAGCCTGTTGCTGGCTGTTGTCGATATATATGCTCTTTTAGTGAAGCGAAGTTTACGGAACCCCTGTGTTGTCAGTTTTTTTACAATTGGTGATGGGATTACATCTACTCTTACTTTCACTGCTGCCTGTGCGTCTGTTGGAATCACAGTACTCATTGGAAATGACCTGGATAAATGTAACATGAACCATTGCAGGAGGTTTATGTCGGCCACAGCTATGGCCTTCCGGAGTTGGTTTGCGGTGTCTCCTTCCTTTTACTTGAATTCCTGGTCATTGGCTTCTAGATAA
>F01_transcript_100560
ATGCTTAACATAGAGGTTCGACATATATTCAAGACCCGCGCAAAGATCATTTCTTATATTAGACGTTTTCTTGACAATCTAGATTTTCTGGAGGTTGAAACACCCATGATGAACATGATTGCTGGAGGAGCAGCAGCCCGTCCATTTGTGACCCATCACAATGACCTGAACATGAAGCTGTTTATGCGCATTGCACCAGAACTTTATCTCAAGGAGCTTGTTGTTGGTGGACTCGACCGTGTCTATGAAATAGGGAAACAATTCAGGAATGAGGGAATTGACTTGACTCATAATCCTGAATTCACTACATGTGAGTTTTATATGGCTTTTGCAGACTACAATGACCTGATGGAGCTAACTGAAAGAATGTTGAGTGGGATGGTCAAGGAACTTACAGGT…
>F01_transcript_100561
ATGTACTATGATGACTTGCCCCTTTGGGGTTTCTTGGGGAAGGCTGAGAAGGATGCCAAAGCCGATCCCGGCGAAATCAAATATTATCTATTTAAGCATCTTCATTTTGAGGTATTTTACAATAAGGATCGTGTCATTGAGGTTAACGTACGAACTGACCCTAGTGCTCTTGTGGACCTTACGGAAGACAAGGAAGTTGATGCAGACTTTATGTACACTGTCAAGTGGAAAGAAACACACACTCCTTTTGAGAAAAGAATGGACAAGTACTCACAGTCGTCTAATATGCCACATCATTTGGAGATACATTGGTTCTCAATCATTAATTCCTGTGTGACAGTTCTTCTCTTAACTGGTTTTCTTGCCACAATTCTCATGCGAGTTCTTAAAAATGATTTT…
>F01_transcript_100562
ATGGATGGAGTTTGTGCATCTTGTCTCCGGGAACGTCTTTTCATTCTAATTGAAGCACAAGCCCAAGCTGAAGTTCAAGCCCAAGCTAGAGAAGATCACCGGAAGTCCTACGCCAATCCGCCGCAACTACAATTTCCGCGGTCTGTTTCGCCTTACATCAGTTGCCGGAAATCTGATAACTTCGACGCCTGGACTCACCACGGGCATAGTCTCTCCGATCAGAGGTTTTACAGTACACCGCAAGTAGGCCCAAACGGAGGGATTATACCGGGGAATTTGTACAGGAAAAAGCAAGGGAAATTCTCGCTGTTCTCGAATTTGTTCAGATCCAAAACGCATAAATTCGATTTGGATTTGAAATCTCGAGAATCGTATTCTACGGCTTCTTTGCCGACGACA…
>F01_transcript_100566
ATGCATTCTGAACTAACTAGAATTGAAATGGATGATGAACAATCACTATTTCAGCACCAGATAACTTCAAGAGAATCTCAGCAATCGTCTTCTACTTTTCAAGGAAATAAAACGGATACGGTTGAACTAGTGAATATGATGCATGCAATTGAAGAAGATCCTGATAGTTTCAGTTTGGAGAGTAGTTATAAAAATATAAAAAAGAAATTACCTAAGGAGAAGAAAATTCATACTCATAGCCAAATATTCAACTACGCTTATTCTCAACTTGAAAAGAGAGAAGCTCTCCAGCTGGAAAACAAGAATCTAACCTTCTCAGGAGTAATTTCAATGGCTACCAATACTGAAACAAGAAAAAGGCCTGAAATTGAGATTGCTTTCAGGGATTTAACCCTTACT…
>F01_transcript_100568
ATGGCTAAGAAACGGAAGGTTAGCTCAACCCCCGAAGCTCAACGACCTACACAAGAGCAAGTTCCAGAAGAACAAATTGAACCAAAAGAAGAACAAGTACAACAGATCGAAGAAGAAGAAGAACAACAAGAGGAAACCAACGAAGAAGAAGAAACTAACGAAGAAGATTTTGATTCTATTGGACAAGAGCAAGACGTAACTAAACAGCCAGAGGGGCCAGAGGGTATGGATGAGGACAAGAAAGAAATCGAAGAAAAAAAGGAAGACCTTCAAGAAGAACCCCAAATAGTTGTTGCCTCTAACGGTGGCGATCAACAATCATCTTCTGAAATCGAAAAACTAGTGGAAGAAGAACAAGAACCTGTGGAGAAACTTATTGAGCCTTTCTCCAAAGAACAA…
>F01_transcript_100570
ATGTCAAGATTCCAAGTTCGTGGGAAAGTGGTGGATACTGTTGATTTGTTGAGGAAGAGGAAGTTGCCATGGCGATTGGACGTGTTGCCATTTGCCATACTCTATGCTGCTTGGATTGTAACCCTCATTCCTAGCTTAGACATTGTAGACTCGTTTATAATTCTCGGTTGCCTTGTAGCGGTTCACATGCTCGTTTTTCTCTTCACTGTTTGGTCAGTGGATTTCAAATGTTTTATCCAATACTCTAAGGTTGATGACATTCACCAAGCAGATGGATGCAAGATTACTCCAGCTAAATTCTCTGGCTCTAAAGAAATTGTCCCACTTAAATGTCGGAAGCTGCCAGGTTCCTCATCCTCAGTAGACCAGGAAGAAATTTATTTCGACTTCAGAAAGCAA…
>F01_transcript_100575
ATGGGCTGCACTGTGCTACGCTGCTGTAGCTGTTTTGATGATCTCTCGGTGCTTAGCTATTCATTCTCAAGTTCATTCTTTGGTCTCTCCGATGAGGAAACTAGAGATGTTGAACTCATCCAGAATCTTCTAGCTTCTGCTGAGAAAGTAGGGGAGCAGCAGTTTGAATGTGCAAACAAGCTCCTCAACTATTGTCATGAGTACTCTTCCTAA
>F01_transcript_10058
ATGAGGTCATTTAATGCGATTAACCACTTTGCAACACCTCTCTGCCGATGCCTTGAAGTTCCTTCAACCTCCCAATTTTTCTGTAATTTTAGAGCTACAACAAACCCTAGCTACTTGTATTCTCACACTCGTCTGCTTTCCTATACAGCATCAGATTGTGGTACATTTATGGAGGTGGTAAAAGCAGTTGGTAGTCAGGGTGATACGTCAGGCGAACGTGTTTGTATAAGAGCTGATCAGAAAAGCTACAGTTACTTCCAACTGATTTCATCTGCTTGGAGTATATCATGTCTATTATGCACTTCTTACGAAAAACACTTGCAGGTTGACGGCATCACAGAGCATGAACATCTTGGTGGAGCTAGAATAGGAATTGTGGCTAAACCTTGTGCCGAGTTT…
>F01_transcript_100580
ATGGCGTCGAAATTGTTCAAGGCGAGCCGGTTATCAATGTCTTCAGCTGCGGATGGGTCAGAATCACAACAGAAGCCACCTATGCCCCCTACTGTGACATTTGGCCGGAGAACCTCATCTGGTCGATATGTTAGTTATTCAAGAGATGATCTTGATAGTGAACTTGGGAGCAATGATTTCATGAACTACACCGTACACATACCACCAACCCCAGACAATCAACCAATGGATTCGATTTCCCAAAAGGTTGAAGAGCAGTATGTATCAAGCTCACTATTTACTGGTGGATTCAATAGTGTTACGCGAGCTCATCTCATGGATAAGGTGATTGAATCAGAAGCAAACCATCCGCAAATGGCAGGTGCGAAAGGATCTTCGTGTGCCATTCCTGGTTGTGAT…
>F01_transcript_100586
ATGGGTTATCAAGGCTCCAAACTCATTCCATGTTGCTTGGTTTCAGAATATAAGGCATCGATAGTTGAGGCACCAGATGCTGGGAATGAAGAGAATGGTGATGCTGGTAACTTGCCTGCATTCCGTGAATTCACATTTGAACAACTTAAAAATGCCACATCTGGTTTCGCGGTGGAAAACATTGTCTCCGAACACGGGGAAAAGGCTCCAAATGTTGTATATAAAGGGAAACTGGATAATCAGAAGAGGATTGCTGTTAAGCGCTTTAACAGATCGGCTTGGCCTGATTCCCGACAATTCTTGTGA
>F01_transcript_100589
ATGGGGGGTGACTTGAACCTGACAATTGAGATGCTTACTCAGCTTGAGCTTCAAGTTGATGGTGGTTTGACTCAGAATCTCAACTCGAAGGCATTGTCATTTCCAAACCTTAGTGCATTAGATTTTCCTGCGCTATCTGTTGCAGATGGTCACAATGGCATGCCAAAATTCTCTGGAGATGAGATCCAACAAAATTTTAGTCCTTATCGAGCTTTTGAGAAGGAAAACTTGCTCTTCTTCAAATCCAGATCTTCCATTCCATCCAGAGGGCCCATAGATTTTGCTTCGGCAGTGAGAAAAATGGCATCCCAGGATTCTGGTATATGGAAGTACGATAGAAATGTCTCTCCAGATGCAAGCGTTGGCTCTAGTCAAAGTTCACATGTTTTAGCTAGCTCT…
>F01_transcript_100590
ATGTACGAATTTCTTTACTTTGATTTTGTTTCTGCTTTTTTAAATATAAATATCTCATTTGTTGGTGATGTTCACCTCATAGATCTTCTTTTCTATTTCTGGATTACCTTTAATGGCTTTGTTAATTTTGAATCTGATTTTGGTAGCTTTGGGTTTGCTTCAGTGTTCTTTTTAAAATATTAG
>F01_transcript_100593
ATGTTAGATGAGAACTTTACTGCAAAGCTATCTGATGTTGGGTTCTTCGGTCTGGTGGAAATCAAGTCACACTACCAACACACTTCATGTTCCAAAGATTATGCTGGCCAAGTGTGTGGAAATACAGTCTTTCAACTTGGTTTGCTAATACTCGAGCTAATAACGGTCAGTCATCAGGAGAGGGAGGTGTTGATCTAA
>F01_transcript_100598
ATGTGGTGTTTGCAGAATATATACAACTTCGGAGCCAGAACATTTTGGATACACAACACCGGACCGATAGGCTGTCTTCCTTATATTTTAACACATTTTCCGGTCAGAAAAGACCAAACAGACAGTGCTGGTTGCGCAAAGCCTTATAATGAAGTCTCTCAATATTTCAATATCAAGTTGAAGGAGGCCATTGCTCAACTCCGCAAGGACCTTCCCTTAGCTGCAATCACACACGTAGATATCTACTCTGCCAAATATTCTCTTTACAAGGAACCTAAAAAATACGGTATATATTCCAACCCTATTTTTATTTAA
>F01_transcript_100599
ATGCAGGAGCCTAAAGCTGACAATGATGACCAAACCTGTAGCTCGGTCAACTTCTACATAAATCAGCCTCTGGAGTTCCCTGATGAAGAAGAACCTGATGCTTCAGTTCCCCTGCAGAATTCTGAATATATGATCAAAGAAGATATCTCATCAAGGGCTGGGAATTTGGTAGGCCCAGGCATTGGTGCAGAAGTATCAGGTGATGTTACCTCTTCAGGGCCCGTGAAATTGGCGGATCTGCAAAGAATATTAAGTAACATTGGGTCTGCAGATGAAGCTGGAGATCCAGATGCAGGCTTGGGATTAGGTGATATTTTGAAGCCCGAGTTGATATTGCCTTTGATCGAGACATTATCGCTCGAACAAGGGCTTGTGTCGCACTTACCTGAGGGGCAATGG…
>F01_transcript_100601
ATGGATCAGATCACAAAGCGAAGGGAGGAGGTACGATCTGTTCTTTCTGAAGCACCTGCTCAATCACTTCAGGAGTTGTATTTTTGGATTTCCAGCGACTGGCTTCGTCATTGGGCTGACAACATCACATCAACCATGATTAACAACACTCCTATCCAATGCTTGCATGGAAAAGTTCCTGTTTCAAAAGTTGGATCCTTGAAGCGGTTGTCAGCCAAGGCTTGGGATAGGTTATTCTCCAAGTATGGTGGAGGCCCTACATTGGCCCAGGGTGACTGCTGTACGGATTGCATTATTGAAAAGGCCCAAGGTATGGTATGCGCTGATAGCTACAGAGATCGTAGAACATCAATGAGAGAACTTGCAGAGGCAGCACTCGCAGGGAGGTGTCCAGATGGA…
>F01_transcript_100603
ATGGTATCCGAGCTCTTTATCCTTCTTCCTACACGAGAGTTAGCAGCTCAAACAGCAAGAGAGTGCAAGAAGTTGGCTAGAGGAAAGAAATTTTATATCAAGTTGATGACCAAACAGCTTGTAAAAACTGCTGATTTTTCAAAATTGCATTGCGATATTCTAATATCAAACGCCATACCGTGTACAATTTGCTATCCGCAAAAAAAAAAGCTTGATTTAAGCAGGGTTGAGTACCTTGTCTTGGATGAATCTGATAAGCTATTTGAGCTTGGCTTGGTGGAGCAAGTTGATTTGGTGGTTAAAGCTTGCTCAAATCCTTCAATATTACGCTCATTGTTCAGCGCTACATTACCAGATTCAGTGGAAGAGCTTGCACGCACATTAATGCATGATGCTGTT…
>F01_transcript_100608
ATGCGTGACCCTAGTGGAATCAGCCGAGGATCTGGATTTGTTGCATTCTCAACTCCTGAAGAAGCTACTCGAGCTCTTGCTGAGATGAACGGGAAAATGATAGTCAGCAAACCACTTTATGTTGCTTTAGCTCAGCGGAAAGAGGAGAGAAGAGCAAGGTTGCAGGCACAATTTTCGCAAATGAGGCCAGTTGCAATGGCACCTTCAATGGCTCCTCGCATGCCAATGTATCCACCTGGTGCTCCAGGAATTGGACAACAACTATTTTATGGGCAAGGACCCCCTGCTATGCTTCCTCCCCAGGCTGGGTTTGGCTATCAGCAACAGCTGGTTCCTGGAATGAGGCCAGGTGGTGGTCCTATGCCAAATTTCTTTGTGCCAATGGTCCAGCAAGGGCAG…
>F01_transcript_10061
ATGAAAATCCTTACCGAGCGTGGGTACTCTTTTACCACTACAGCAGAGCGCGAAATCGTCAGGGACATGAAAGAGAAGCTGGCTTACATAGCACTTGACTATGAGCAAGAACTTGAGACCTCAAAGACTAGCTCTTCGGTTGAGAAGAGCTATGAGCTTCCTGATGGGCAGGTAATCACCATTGGTGCTGAGCGGTTCCGATGTCCTGAAGTTCTCTTCCAGCCTTCAATGATTGGAATGGAAGCTGCAGGAATTCACGAGACCACATACAACTCAATCATGAAGTGTGATGTCGATATTAGGAAGGACCTGTATGGAAACATTGTACTCAGTGGTGGGTCGACCATGTTCCCTGGTATTGCTGATAGAATGAGCAAGGAAATCACTGCTCTAGCTCCA…
>F01_transcript_100612
ATGCCAACTGCAAAATTTAGGGCCAGTAGTTCTCCAGAAGCAATGAAACCAGAAGAGGGAAATGATTCCCTGGACACTTTCATCAGACAGGCGATCGGTAAAGAGCCTTATCTTTCTTTCTCAAGGACAAATGATAGCCCAGTGCAATGGATCCAGTTACTTCATGCCTTAGACCAGCAAGATCTTCCTGGTTGGCCCTTGCTAACTCCTTTGAAGGTTCAGATGCAGAAGTGTGACAAGTGTTCCCGAGAGTTTTGTTCACCGATCAACTACCGGAGACATATACGTGTGCACCGGCGTTCTTTAAATGTTGACAAGGAGTCTCACAAAAACAGGGATTTATTGGGAGCATTTTGGGATAAGATATCTATGGATGAGGCTAAGGAAATTGTATCATTT…
>F01_transcript_100613
ATGTCATGGGTATGCTTGGTGAAGGGTGAAGCAAATATTTCATACATTTGTTCACGGTTCTATCGCGCTCCAGAACTCATATATGGTGCAACTGAATATACAACTTCAATTGATATATGGTCAGCTGGTTGTGTTTTGGCTGAGCTTCTTCTAGGCCAGCTATTGTTTCTTGGAGAAAACGCTGTGGATCAGCTGGTAGAAATTATCAAGGTTCTTGGCACACCAACTCGAGAAGAAATTCGTTGTATGAATCCAAATTATATTGATTTTAGGTTTCCCCAAATCAAGGCACATCCATGGCACAAGGTTTTCCACAAACGAATGCCTCCAGAACCAATTGATCTTGCTTCACGGCTGCTGCAATAA
>F01_transcript_100614
ATGGTGACTCCTGGATCTGATTCTAAGAAGGTTGCACCTGAGGTGATTGCCGAGTACACGGTTCGTGCACTTCAACGTACAATGCCTCCCGCTGTTCCTGCAGTGGTGTTTTTGTCTGGTGGGCAGAGTGAAGAGGAGGCTACAGTGAACCTCAATGCCATGAACAAGCTCCAGACAAAGAAACCATGGAGTCTGTCTTTCTCATTTGGGAGGGCTCTTCAGCAGAGCACCCTCAAGGCTTGGGCTGGGAAGCCAGAAAATGTGAAGAAGGCTCAGGATGCATTCCTTACAAGGTGCAAGGCCAACTCAGAGGCAACTCTAGGGAAGTATCAGGGTGGTGGGGCTTTGAGCGAGGGTGCGGCGGAGAGCCTCCATGTCAAGGACTACAAGTATTGA
>F01_transcript_100617
ATGCCACTCCACTTACCTAAAAGGGATAGCTCTAAGACGAGTGACTTAAGGAAGAAAACTATTGCTAAAAGGAAAGGCAGTTGGTGGAGGCAGTTCTGGTTGCTCCTTAAACGTGCATGGATGCAGGCTTCTCGTGATGTGCCAACTAATAAAGTTCGGGCAAGAATGTCAGTTGCATCAGCTATGATATTTGGGTCAGTATTCTGGAGAATGGGAAGGTCACAGACATCAATTCAGGATAGGATGGGATTACTTCAGGTTGCTGCCATAAACACAGCAATGGCTGCACTCACAAAAACCGTTGGCGTCTTCCCAAAGGAACGTGCAATTGTAGATAGAGAGCGTGCAAAGGGGTCTTATGCTTTAGGGCCATACTTACTTTCTAAGTTGCTAGCTGAG…
>F01_transcript_10062
ATGGCGGAAGTAGCTCAAAAACTCGAACATCTCGAAGAAGTTATGGGGCAAGCTCAAGAAGACGGCCTTTCGCATCTAGCTTGCGATACCGTTCATTACAACCCGTCTGATTTATCTTCCTGGCTCGAATCTATGATTACAGAGCTCAACCCACCAAATGATATGTTTCTCTCTCCGGCAGAGTCGTCTACTAACAAGATAATCTTCGATGATTCATCTTCTTGCAATTATGATCTTAAAGCAATTCCGGGAAACGCCGTTTACCCTCCGATTGTTCAATCACCAGTTCCTCCACCAAATAAAAGATTCAAAACCATGTGCCCAACAGATCCATCAATTTGGCAAACTCCGGTTCAATCTCAACAATCTCAACAACACCCAAATGAACCCTCTCGTTCA…
>F01_transcript_100624
ATGCTTATGGATATGTTTTATAGTGCAACTGAAGGAATTGTTAAACATCGAAGGAGGTTTCACTTTCATGAGGCTATGCTTGAAATAAATGAACATATGCATAAAATATGGAAAAAGCAAGTGGAAGAGAAGTCTCTACAGTCGAGCATTGCTAGTTGGATTATGAATCTTCCGGTTGATTCTAAAGTCAAAGAATGGGTAGCTGCAGAAGAAAGATATAAGCAAGAAGTACAGATGAAAAACATTCTTCCAGCTGTAGCAGATAAGTTTCTTGTCGATTGCCGGAGAGATCAAAGAGGGGCTAGCGTTCTATGTTTCGATGAAATACAGACAGTTGATGTGTTTGCTATTGTGGTCCTATCTGGAATTCTAAGCAGATTGTTAAGTACTGGAACTGTT…
>F01_transcript_10063
ATGTTCTTATTACAGCTTAAATTAGGGGTTTTGCTGCTCAGCTCAATCTGTTTAACCGCCCAATCCAAGTGCAGCAAAGGCTGCAACTTAGCTTTGGGCTCCTACTGGGTTTGGTCGAAGACAAACCTAACCTTCATAGCTGAAGTTTCAAACAACCCAATCAGTGAAATTCTGAGTTACAACAAGCAACAAATCCCAAATCAAGACAGTGTTCAGTCCGACATCAGAATTAACATACCCTTCTCTTGTGATTGTATCAACCGCGAGTTTTTGGGCCATGTTTTTACTTACAATGTTCGGAGCGGCGATACTTACGATAGGATTGCGAATTTGTACTACGCCAATTTAACCACCCGGGATTGGTTGCAGAGGTTTAATAGTTATAACCCGAATAATATT…
>F01_transcript_100630
ATGGCATACGGCAGCCTTGTAGATTTTCTAAGAGAGCAGAAACCAGGTTATACAACAAACCTTATTCGGAATAGAGTGCTGCCGTTGTATAAATCATCTACCTGTCATCCTTATTTAGTTGCCTCTGCAAACTGGGTGCTTGGAGAGTTTGCTCCCTGTATCCCTGAAGAAATGAGTGCTGATGTATATTCTTCACTGCTCAAAGCATTAGCCTGGTCAGATATGGGGGATATTTCATGTTATCCTGTGCGAGTGTCTGCTGCTGGTGCCATAGCTGAACTTGTTGAGAATGAGTACTTGCCACCTGAGTGGTTACCTGTTCTTCAAGTCATGGTTGGTAGGATTGGTGATGAAGATGAAGAGAGCCCTATTATATTTCAACTTCTTTCTACTTTGGTG…
>F01_transcript_100632
ATGGAGTTGGGGGTGAAGGTGTCTCCGCAATGGCGCCATTGGCTAAGTGGAAGAATGATTTATCAAGGGCGTTTCAGTATTATTTGGATAGGTCCAACACCTCTTCCGGTCCATAGGTGGCTCGGAACTCTTGCTGTTGTTGTGATATACATCTTGAGGGTTTATTTTATTCAAGGGTTCTACATTGTGTCTTATGGGCTAGGAATCTATGTTTTGAATCTGTTGATTGGGTTTCTTTCACCCAAAGTTGATCCAGAACTAGAAGCCTTGGATGGGGCCGAGTTGCCAACAAAGGGATCTGATGAGTTTAGGCCTTTCATTCGTCGGCTTCCTGAGTTCAAGTTCTGGTGA
>F01_transcript_100634
ATGGCAAAGAGTGGTGTTAATTTGGAGGAGCTTCAGTTGAAGAGAATGGTGGTTTCTGATGATAACCTTGAGCTTCTTTCCCGGTCTTTTGTAAATTTTAAATCTTTGGTTTTGGTTAGCTGTGAAGGATTCTCTACTGATGGCCTTGCAGCTATTGCTTCCAATTGCAGGTTTCTTAGGGAGCTGGACTTGCAAGAAAATGAAGTTGAAGATCATAGAGGGCAGCGGCTTAGCTGCTTTCCCGACAGCTGCACCTCGCTTGTCTCCTTGAATTTTGCATGCTTGAAAGGAGAAGTTAATCTCTCTACTCTTGAGAGACTGGTGGCAAGGTGTCGTAATCTTAGAAGTCTCAAGTTGAACCATTCAGTTCCTGATGATTCTCTTCAGAAGATTTTTGTG…
>F01_transcript_100635
ATGGTCCAATTTTCTAAACGTCTTGCTTCTAAAGGAATGAAAATCACCGTAACCACCACACTATCCAATACCAAGGCCATGAAAAAGGCATCTAGCTCACTTATATTTGAATCCGTATATGATGACGCCACTGAAGGTGGAGTGGGAGCACCTGGAGGATTACAGGGATTTCTTGACAGGTTTGAAGCTATCGGCTCAAGAAACTTAGCTCAACTCATCAAGAAACAAGAAAACTCTGGATACCCTATTAAGTGCCTCGTTTATGATGCTAACATACATTGGGCTTCAAATATAGCCAAGCAGTTTGCGATACCTGGGGCTGCTTTTTTTACGCAATCATGTGCTGCTATTGCTAGCTACTACCCAATGCATTGTGATTTATCAGACAAGTCTCTGCCA…
>F01_transcript_100636
ATGGATTCATATGAAGCAACTAGGGTTGTTTTTTCAAGAATTCAAAGCTTGGATCCTGAAAATGCTTCAAAAATCATGGGTCTTCTCTTAATCCAAGACCATGGTGAAAAAGAAATGATTAGGCTTGCTTTTGGTCCTGAATCTTTAGTTCACTCAGTCATTCTCAAATCAAGAAAAGATCTTGGTTTATCATCAAACGCTCCATCCACTCCTTCAATTACTCTCTCCAGACAGAATTCCTCTAATTCTTCAGCTTCTTCTCGGCTTTTAAATGGTTCAAGTCTTCCATCTCCACTAAGTATACCAAACCCTTCTTCTTGGGCTGGAGCTTGTAATTTTTCCGAGTATCATCAAAACCCTGAAGATTTATCAAGTCCAAATTCATACCCAAGTCACTTT…
>F01_transcript_100637
ATGGTGAAAGAAATGAAGCTGAATTGGAAAGCGTGGTGGTGGTCTCTTCTTAAGAACAATCACTGGGTTGTTAAATTAGCAGTCGCATTTCTCTTGGTGGGTCTTGCTTTTAGACTTCTTTCCTCTCGATCCACTGAGTTTCCCAATGTTGCAGAAACCCCTTTTCTTCAGGAACCTCATCACCCAAAACCTCAAGCTTCTTCAAATTTATCTGAATCTAGAGATCAGATTCCTCATAAAGATAGTGCAGGAAAATGTGATCTTTCTATTGGGAATTGGATCGCAAATCCGGCAGGTCCTCTTTACACTAATGAGAGCTGCCAATTTATTGAAACTCATCAGAATTGTATGAAGAATGGGAGGCCTGATAAAGGGTATCTTTATTGGAGGTGGAATCCA…
>F01_transcript_100639
ATGGTGAGGAAGAGGTCTGAGTCTCAGGAAACAAGTGGAGTATGTGGTGCTGGAGCAACTCAGCCTCCGCTACAACAACAGCAGCAGCAGGGTGGTGGTTCAGCTCAATGGCCGCCACAACAGCAACAGCAGCAACAAGGTGGTGGTGGATACCAAGGTGGGGGAGATAGAAGCTGGGCTCCTCAACAACAAGCTGGTGGGTATGGTGGTGGACGTGGTGGTCAGCGGCCTCCTGAGTATCAGCAGCAGCAGGGCAGGGGAACTCAACAGCAGCAGCAACAACAGCTACGAGGACCACCACCACAGCACCGTGGCGGTGACATGGGTGGTGACGGCCGTGGAGGGGTTGTACCTTCTTCTGGTGGACCTTCTACGCCATCAGTACCCGAGCTGCACCAA…
>F01_transcript_10064
ATGGGTGTATCGAATAAAACGCTCGAGTTTCTCACAATGAACCCTATTGGAAAGGTTCCTTTGTTGGAAACTCCTGATGGACCTATCTTTGAGAGCAACGCTATTGCACGTTATGTTACCCGTTTGAAGCCTCACAGTTCTCTATATGGTTCTTCACAAATAGAATATAGAGAAAGACATTCTGTTTTAGGAAGTGATGGAATAAATGGAAAAAATGTACTGAAACCCATCTTTCACTTTCAGACTTGGAGAATTGGTCAGTCAAAAAACATGCATTTAGAGCCTTCTTGCACTACAATGGATGAAGTTGACATTGGAGCTTCCCATTTAATTTACCGATCATGA
>F01_transcript_100640
ATGGGAGAGTTGCTTAGGCAGCAACTAGTGAAGATTCGGCAGCAATTTCCTAACTTTATTAAGGAAGTTCGAGGAAAAGGGTTATTCAACGCCGTGGAGCTTGATGGCAAGGCCTTATCCCCTATCACTGCTTATGATATATGTCTCAAGTTGAAGGAGAGAGGAATCCTCGCTAAGCCTACTCATGATTCAATTATTCGGTTAACCCTCCTCTCTGCATGA
>F01_transcript_100641
ATGGATGGTTTTGATCTATCTGGGTTGCCTAATCGCATGGATGACTTGGACGAGTATGATCTTTTCGGAAGTGGAGGAGGTCTAGAATTGGAATCTGATATGCTGGATAATATGAGTATCGGAATATCAAAAGTAAGTTTATCTGATGGTGTTGTTGGTAATGGGGTGGCCCAGTACAGTCTTCCGAATGGCGCTGGAGCTGTTGCTGGAGAACATCCATATGGAGAGCATCCTTCCAGAACATTATTTGTTCGCAACATTAATAGTAATGTTGAGGATTCAGAGTTGAGAACATTGTTTGAGCAATATGGTGATATTAGGACTCTATACACTGCTTGTAAACATAGGGGCTTTGTGATGATATCTTACTACGATATTCGTGCTGCTCGTACTGCTATG…
>F01_transcript_100642
ATGCTACAAAATGTTCCATACCAAATCGTACAATCACCAGCCAGGCTTGGCCTGCCAAATCCAAATTCTCCCTCTCTTCAAACTCCTCCTACTCCTCCCAAATTCTCCTCCCAAATTTCCCAATCTCATCACTCTCATCAGCAGTCAAATCTCTCGACCACAACCACTAGCACCTCTTCTACCCTGCTTCCTCTCCTTCCGCCGCTCTCTAGAGCTCAATCTCTTCTCATCCAAATGGCGTCCCTTGCGTCAAGACTCTTTGAAGTTTCACCCAATCGACCCCATTGGCTAAGTGCCTTCCGCGGTTCGCTCCCTTCCTTTTTATCATCCCAAACCCAATCCTTGACACCAATTCCTCTAGATTCCCATCCTTCTTCCCTGAAAGAAATCATCCCCCTC…
>F01_transcript_100644
ATGTTGAAGGATGTGGTGAGAACCAAAACTTACCAAAACGTAATTTACAAGAATTGCTTTCTAGTTAAGGACAAGGTAGTTCTTGATGTAGGTGATGGGATAGGAATTTTATCCCTCTTTTGTGCAAAAGCAGGGGCAAAACATGTGTCTGCGGTTGAGTGCTCCCAGATGGCTGACATGACACAAGAAATTATTAAAGATAATGGTTTTTCAAATGTTATAACAGTTTTAAAGGGAAACATAGAAGAGATTGAGCTTCCAGTTGCTCAAGTGATTATAATTATTTCTGAATGGATGGGGTATTTTTTGTTCTATGAGAACATGTTAAATACAGTCCTTTATGCACGGGACAAGTGGCTAAGGTCATTGTCTAATGGGAAATTAACCAGAAGACTGGGG…
>F01_transcript_100646
ATGCTAGAAACTGGTCGTGCTCAGCTCGATCGGAGTTTCAGACAATTGAAGAAAACTGTGTATCATTCAAGCGGAGAGTTGAGTAACCTGAGCTCAAGCTGGACTTCGAAGCCACCATTGGCGGTGAAGTACCGGTTTGAACCCGGTTCAATGGATGAACCGGGCAGTTCTAAGAGTCTATGTTCAACATTAGAGCGACTCTTGGCTTGGGAAAAGAAACTCTATCAGGAAGTAAAGATCAGAATTTGGTGTCCTTTTGATCTACTATTACTTATGTGA
>F01_transcript_100647
ATGGCGCTAATTTCTTCTATTAACACCTGTAATAACTTACACCACCATAAATCCTTCTCTTTCCCGAACCCTAATTCCATTTACTCGAAGATTTCCATCAATCGGAAGCGCCCTAGATTATGCCCACTTGTTAATGAATTGAATAACGATTCGGACCAAAACTCTGTACAAGATGACGAGGTTAACAGTTTGGGAGTTAGAACTGCATTATCTATGCTCACGTTCTACAAAAGGGAAATCTCGCCATTGATGCCAAATAGTTGTCGTTATCTTCCAACATGTAGCGAGTATTCAATGATTGCTTACAAGAAATATGGAGTTATTAAGGGGACTATCTTGACTGCTTGGCGTCTCTGCCGCTGCAATCCCCTTGGAGGGTCTGGATTTGATCCCCCAAGA…
>F01_transcript_100649
ATGGGGCCGAAGACCCTTTGCAATGCATGTGGAGTTCGTTATCGGTCTGGTCGTCTCTTACCAGAGTATCGTCCAGTAGCGAGTCCTACTTTTGTTCCATCGTTGCACTCAAATTCCCACAAGAAGGTTATACAGATGAGAAATGAATGTATCCAGGAATCTTTGATGCCCGAGATGGACCCTGCAATGTCTCCACCACCAGAATTCGTTCCCATGAGTAGCTATTTGTTCGACCGCATATGA
>F01_transcript_10065
ATGGAGAATATCCCAGAGCAGAATCAGTTTTCTTCAATTCCAATTGGAACTACTAATGGAATTGTAAATGGGTTTAAGCTTTTAGCATCAGATAAATACACAAGCATACAAGAATTTGACAATCGATTTATGCATTCGGGTATTGAACAAGATTCTTCTTCGGGAACTGATCATGATTATCAAGACCCGTCAGTTTCTGACTGTGAAAGTGGGATTTCTGATTCCAACAACGAAGAAAGTCAATCTGTTAATAATGGATTGATTAATGTGGTTGAAGGAGAAAGCCTGTATGAAACAGTTAGTCTCAGGCTTATTTCGGGTTTGGGCAATCTAGGAGTGAATACCAAGGTAGAGGCCATTTATAAGAATTCCTTTTCTGGTTTTACCAATCAAGCCCGG…
>F01_transcript_100651
ATGAATGTCATGCGGCGCCTGAAGAGCATTGCTTCTGGCCGCTCCTCCGTTTCCGATCATGGTGGAGATTCTAGCATAAAGAGGGTAAATGTTGAGCAAGACACCAATCAAAGGGTTTCTAGAAAATTTCATTCAACTGAGAAATGTGCCACATCAGTGGAGCAGCATATGGAATCCGCATCTCGGGAAACTACTGCAAGCACCAGAGTATCTTCTATTGTTAGACCGGAGAAATCTGACCTTGATGAGCTTCCTTTAGTAATGCATGAAATGAAGATTAGTGAGAATACATCTGACATCCATGGTGACAAGGATATTGAAGCCACTGTTGTTAGTGGTAATGGAACAGAAACAGGTCAGATAATTGTGACTTTGGTGGGTGGTCGAAATGGGCAAAAG…
>F01_transcript_100652
ATGGGTAAGAATGAGCAGCTGCACACTTCTGGTCATACTCATCGTGCAGAACTGGAGGAAGTGCTTAGGATTGTAAAGCCACAACATTTCCTACCCATCCACAGTGAATTCTTGTTTCTGAAAGAGCACGAATTGCTTGGAAAATCTAACGGCATTCTCCTGGGCAGCTAA
>F01_transcript_100655
ATGTTGGTGGCTAACTTGGAAGGGAGTGGCAACTTGAGCTACGTTGGAGGGGACATGTTCAAAGCAATTCCTCATGCAGATGCTGTTTTCTTAAAGTGGATATTGCATGATTGGGAAGATGAAGAGTGCCTAAAAATACTGAAGAAATGCAAAGAGGCAATTCCAAGCAAGGAAAAGGGAGGAAAGGTTATCATCATAGATATGGTAGTGGATAACCAGGAAGGAGACTACTACAGAGCAAGCGAAACAAAACTTTGTTCCGATATGTTGATGATGGTTGTTGCTGGGGGAAGGGAGAGAACTACGAAAGATTGGGAAGTGCTCTTTAAGAATGCTGGCTTTAGTGACTACAAGATTTCTCCTCTACTCGGGTTGAGATCTCTCATTGAAGTTTATCCT…
>F01_transcript_100657
ATGAAATACTTTCCCTTGTTAATGTCATTCTTTTTCATGATAAAATTGCTGCTACTCTTTTGTGTCTCTTCTGCAAGTGTTAAGGAAATTGCTTCAGCAGTGGGAGACCCTGGAATGAGAAGAGACGGGCTTAGAGTGGGCTTTGAGGCCTGGAATTTCTGCAATGAAGTTGGTAAAGAAGCCCCTTCAATGGGAAGCCCAAGAGCTGCAGATTGCTTTGATCTCTCAACTGAAGGTGCAGAGTATTCTCTGAATCACAAAGTAGGTGAGGCAGATAACAAACTTGGAGTGGGAAATCAATTTCCAGGTTTGAGTCCAAAAGCTCTGAATGATTCAGACCTTTATGCAGCTGAAAAAGAGAAGTATTTGGGTTCTTTATGTGAAGTTCAAGATACCCAA…
>F01_transcript_100659
ATGTGGTTTACTTTCTGTCTTAATGTTTTTGTTGATAGGACTGGTTTTAGTAGTATGTATGTACTCGTATGGTTTGTATTGAAAATGGGATGTTCTTCTAGTTCTTCTATTTCAGAAAAGCCTGATGACTTTCTTGTTATATATTATTCTAGGATTATAAGGGCCTATAGTTCTGAAAGGGTTATTTTGAGTTTTGTTGTGTATCTGGTAAAAACTTTTCTCTCCCCTTGA
>F01_transcript_100661
ATGATAATTATTGTTTCTCTGTTTCCAGGGACTTACATTGACAAGAAATGCCCATTTACTGGAGATGTTTCGATCAGGGGCCGTATTCTTGCTGGTACTTGCCATAGTGCCAAGATGATGAGGACTATCATTGTTCGCCGCAACTACCTGCACTATGTCAAGAAATACCAGAGGTATGAGAAAAGGCATTCAAACATTCCAGCTCACGTATCCCCTTGCTTCCGTGTGAAAGAGGGAGACCATGTAATTGTTGGCCAGTGTAGGCCATTGTCAAAGACAGTGAGATTCAATGTGTTGAAAGTGATCCCAGCTGGGTCTTCTGGTGGTGGTGGAAAGAAGGCTTTTACCGGCATTTGA
>F01_transcript_100663
ATGATCTCGCTATCCAATGCATTGCTTGGTATGGACGCCAATGATCCTCCTAAAACCTTGGCTACTATGCAACTGCTTGGTTCCATATTTTCCAATATAGCAATACTGGAAGATAATATGGACGAGCTCCCATTCATGGCGACAGTCAGCTTTTCTGAGTGGCTTGATGAGTTCTTTTGCCGCCTATTTTCTTTACTTCAACACTTGGAACCTAGTAGTGTTTTGAATGAAGGTGTTCATTCACCGGCAACTTCAGGAACTTTCCTGGTTGAGGATGGTCCTTATTACTTTTGCATGCTGCAAATTTTGCTTGGAAGGCTTTCAAAACCACTGTTTAACCAGGCTCTAAAAAAGATTTCCAAGTTTGTTAAGACAAATATTCTTCCTGGAGCAATCGCA…
>F01_transcript_100664
ATGGCAGGCTCTTCATCAAATGTGGAATCAAATCTTGATAAGTTGCTTCAATCTGTAACACCCGTTGTTCCTTTGAAACCAATTCCTGAGAGTTGCATCCATGCTCTAAATAGCGTATGGAACCCTGTTGGGAACCCCATAACTGAGTACTTCACGCTGGGGGACTTGTGGAAACGCTACAAGAAGTGGAGTGTGTATGGTGTTGGAACACCTGTAACACTAAAGAATAGAAAGGACGTTGTGCAATATTTTACTCCTTATCTATCTGCTATTGAAATCTTTACCAACATATCTCTGGCAAATATAAGTCTCTCTTGTAGGAGTCTAAGTGATGATAGTGATGAAGATGAATCTGAAAGTGAGTACTCGAGTAATGAGGATGAGAGTGAGAGTGATAAG…
>F01_transcript_100665
ATGTGTGGAATACTGGCGGTGTTCGGTTGTGTTGATAACTCTCAGGCCAAACGGTCCAGAATCATCGAACTCTCGAGGAGGTTGCGCCATAGAGGTCCTGACTGGAGTGGCTTGCACTGTTATCAGGATTGTTACCTTGCTCATCAGAGATTAGCTATAGTTGATCCCGCTTCTGGAGATCAGCCACTATATAACGAAGACAAGACAGTTGTTGTAACGGTGAACGGGGAGATATATAACCATAAAGCTCTAAGGGAAAAGCTGAAATCTCATCAGTTTCGTACCGGAAGTGACTGTGAAGTTATTGCACATCTTTATGAAGAATATGGAGAAAATTTTGTTGATATGTTGGATGGAATATTCTCTTTTGTGCTTCTTGACACCCGTGACAAAAGTTTC…
>F01_transcript_100668
ATGGCGGAAGCGGACGATGTTATGGAAGCTCTGAAGAAAGAAGCCGTGGATTTGGAGACTGCACCAATGGAGGAGGTGTTTCAAAATTTGAGGTGTACCAAAGAAGGGCTTACATCAGAAGATGCTCAGAGGAGATTGGAATTTTTTGGGCACAACAAACTTGAGGAGAAGGAGGAGAGCAAGTTTTTGAAGTTCTTAGGGTTTATGTGGAATCCTCTCTCTTGGGTCATGGAAGCAGCAGCTATTATGGCCATTGCACTAGCCAATGGAGGAGGAAAGCCACCTGATTGGCAGGATTTCGTCGGTATCATTACTCTTCTTATTATCAATTCGACAATAAGTTTTATAGAGGAGAACAATGCTGGTAATGCTGCTGCTGCTCTCATGGCTCGTCTTGCT…
>F01_transcript_100672
ATGCATCAATTTTTTTGCAAACAAGAGGTGGAAACGAATCTTCAATCTAATGGTTTCTCAAAGAAAATACTTAATGTGGATGAGATGTGTGAAAAAATGGACGATTCAACAACATTTGAAGAATTAGAAGCACGCTATATTAAAGAAAGGAGAAGATGCAAGGAACTGGAGAGTTTTATTTCAAAATTAAAGGTGATTGCAGGTGGAGGTGCAGTTGAGGCTGCCTTATCTGTTTATTTAGAGCATCTTGCTACAACTTTAGGATCTCGGGAGCAGCTGGCAATTGCAGAGTTGTTGAATCTCTATTAA
>F01_transcript_100674
ATGGTGATTTCTTTTGATAGGAACTTGGCTGGAGAAATTGCGCAAGAGTATACAAAACGGCAGAGTGAAGATGCAACAATTGATGATTTGATGGATCTTGTAAAACAAATTGTTGCTTTTCACATGAAGCATAATGCTGAGCCTGAGGCTGTTGATCTTCTGATGGAGGTTGAAGACATTGATTTATTAATGGAACATGTTGACAAGACAAATTATAAGAGGACATGTTTGTACCTGACAAGTTCAGCGAGATACCTTCCCGGACCAGATGATATGTTAGTCCTTGATATTGCATACATGATCTATATGAAATTTGAAGAATTTCCAAGCGCGCTTCAGATCGCACTATATCTCGACAACATGCAGTATGTAAAGCAGGTTTTTACATCTTCAGGTGAT…
>F01_transcript_10068
ATGGATCATGTGGTTGGTGGGAAGTTTAAGCTTGGGAGGAAAATTGGGAGTGGATCATTTGGAGAGCTTTATTTGGGAGTAAATGTACAAACTGGTGAAGAAGTTGCTGTTAAGCTGGAATCAGCTAAGACTAAACATCCTCAGCTCCACTATGAATCAAAGTTATACTTGCTTCTTCAGGGAGGAACTGGTGTTCCTCATCTCAAGTGGTTTGGAGTTGAAGGAGAATACAGTGCCATGGTTATTGACCTTCTTGGACCAAGCCTAGAGGACTTATTCAACTACTGTAACCAAAAGTTCACATTGAAAACAGTTTTAATGCTTGCGGATCAGTTAATTAATAGAGTTGAATATATGCACTCAAGAGGTTTTCTTCACCGTGACATAAAGCCTGACAAC…
>F01_transcript_100682
ATGCTGCAAGCCGGCGCAAAGATGGGTCTCACCGTATGTCGAACGTGGGCTTTTAATGATGGTGCCTACAATGCCCTCCAGATTTCCCCTGGTCAATTTGATGAGCAAGTATTCAGGGCCTTGGACCACGTCATTGCAGAAGCCAAGCAACAACGGATAAGGCTGTTACTTGCTTTAGTCAATAACTTACAAGCTTACGGTGGTAAGACTCAGTATGTCAAATGGGCATGGGAAGAGGGCCTTGGTTTAAATGCTTCTAATGATTCATTCTTCTATGATCCATCCATTCGTCGTTATTTCAAACACTATGTCAAGACTGTTCTGACAAGGAAGAATACAATCACTGGAATCGAGTACAGGGATGATCCCACCATTTTCGGATGGGAGTTAATTAATGAG…
>F01_transcript_100683
ATGCTAGTTGAAGCTCATCAAAATGTTGGGAATAAATGGGCAGAAATCGCCAAACGAATTCCAGGAAGGAGCGAAAACTCCATTAAAAACCACTGGAATGCTACCAAAAGAAGGCAGAATTCAAGGCGCAAAAGCAAGAAAAATGATGGCAAAACTGGAAAGTTCTCCTCCCAACCATCTCTATTACAAGACTATATTAAGAGCAAGATTTTGGAAGAAACTAATAATTCCACCTCAACTATCACTACCTCCACTACAACTCCCACTAATTCCACTACCTCTGATGATCCATCCATCAAATTCGACGTACTTTTTCCACAATCTCCTTGTGAGGACTCCACTTCCTTGATTACACCAACTTATGATGATGAATTGAACTTCATGCAATGCCTTTTCGCA…
>F01_transcript_100684
ATGAATACAGAAAGCACATTGAGAAAGACCCCGGCATTGGAGAGGCGATTTCAGCCAGTTAAGGTGCCTGAACCCACAGTGGATGAAACCATACAGATCCTGAAAGGGCTCAGAGAGCGATATGAGATTCACCACAAGCTTCGATATACTGATGAAGCCTTAGTTTCTGCAGCACAGCTGTCATACCAGTACATCAGTGACCGCTTTCTTCCTGATAAAGCAATTGACTTAATTGATGAAGCTGGTTCTAGGGTCCGACTTCGTCATGCACAGCTCCCAGAGGAAGCCAGAGAGCTTGAAAAAGAGCTTAGGCAGATAACGAAAGAGAAGAACGAAGCAGTTCGTAGCCAGGATTTTGAAAAGGCTGGGGAGTTACGTGATAGAGAAACAGATCTTAAG…
>F01_transcript_100687
ATGGTACCCATTGCAGTCATCCATTCATGCTTCTCTACAAGAACTCATATTTGCAGGAATGGGACACCGAGGCAACCTTTACTAGTTCCTCTTGCTAGGGCGTCCTTGATATTTGATCCATCTCGGGTTCCTCCAGCATCTCTTGAGGGTCTTGAAGAATATTCTCATTGTTGGATTATATATGTGTTTCATCTAAATACAGATCTTGATAAGTTGTGGAAGCATCCATCTGAGTCAAAGTTCAAGGCAAAGGTAAGAGTACCAAAACTGAAAGGTGGAAAGATGGGAGTCTTTGCTACAAGATCTCCACATCGCCTATGTCCCATTGGACTTACTGTGGCAAAGCCTGTCTTGGATGTCAAACCTTATCTACCGTACTGTGACAGCATCCACGGAGCA…
>F01_transcript_100689
ATGGATCCCGTCAATACCTGGGGCAATACTCCACTTGTAACAGTGGATCCGGAGATCCATGACCTCATTGAGAAGGAGAAACGCCGCCAGTGCCGCGGCATCGAGCTCATAGCGTCGGAAAACTTCACCTCCTTCGCCGTTATCGAGGCCCTCGGCAGTCCCCTGACCAACAAATACTCCGAGGGCATTCCCGGCAACCGTTACTACGGTGGCAACGAATTCATCGACGAGATCGAAAATCTCTGCCGTTCCCGCGCCCTCCAAGCCTACCGTCTCGATCCCACCCAATGGGGTGTCAATGTCCAGCCTTACTCCGGAAGCCCGGCCAATTTCGCCGCCTACACCGCCGTGCTCAACCCACATGACCGAATCATGGGTCTCGATTTGCCTTCCGGTGGG…
>F01_transcript_100691
ATGCACAACATGATGAAGAATGCTAATAGCGGCGGCACTGAAGTTCCAAAGCAGACTCGACACATCGTTACTTGGTCTCAAGAGGAGGACGATATATTACGCGACCAAATCCGCATCCATGGAACTGACAATTGGGCGATTATTGCGTCCAAATTCAGAGATAAAACAACCAGACAATGTCGAAGAAGATGGTACACTTATTTGAATTCTGATTTCAAGAAAGGGGGATGGTCACCAGAAGAAGACATGCTTTTATGTGAGGCTCAGAAGGTTTTTGGCAACAGATGGACTGAAATAGCAAAAGTAGTTTCAGGCAGGTAA
>F01_transcript_100693
ATGTTGATATTCGGGGGTACTGCGATCATGGGTTTTCTCATGTTTGGTCAAGGTACATTGTCTCAGATAACTTTGAATATGCCACCGGATTATGCTGCTTCCAAAGTTGCATTGTGGACAACAGTTATCACCCCATTCACTAAATATGCTTTGTTGATGAACCCATTGGCCAGAAGTATAGAGGAACTGCTACCTATTGGCTTATCTAATAGTTTTTGGAGTTTTATTCTTCTATGGACAGCACTCGTCATATCGTCACTTGCTGTTGCATTTCTTCTTCCTTTCTTTGATGACACAATTAAAGTAGGCCTTCTTACGTCGTTGCCTAATGCGGACAACGGATTAGTATTATTTAGTGCAACTGCTCGATGGCAGGAAGTAATTTCTGGCGCTTTGTTA…
>F01_transcript_100695
ATGATAACATCAGCTATTTCTTTTGGATTACCACTTTTTAGAAAGTGCAGCCCATGTCCTGAAGCAGATGTTAATTCTGGTATCGAATGCCCTCGTCCACCAAGAATGTATGGGAATTATGTAAATGTAAGATATGATACTGAACCCAAATCAAGTGACACTATTAGTGGTAGCTTGGTTGCTTGTTGGAGTGGCACAAGGCTTCATTTTCCCCTCCATCCACACTGTTTTAGCCCTGTGTTTCCCTCCACACAAAAGATCACAGAAAGGTGTATCAGGCAGATGGGGAGGACATTGCAGGATGTTATCCGCGAGTGGATTACAAAGATGAACAACAGAGAAATAGGTGCTTATATGGACTTCATTTTTTTGCACTTCTAA
>F01_transcript_100697
ATGGGTTGTACTGGGCCTAAATCTGTCATCGAAGTTCGGAATGGTTTAACATTCCTAGACTTGATTGTCATCCAAATTGAGACACTTAATGCCAAGTATGGATGCAATGTGCCGCTTCTTCTTATGAACTCATTCAACACACATGAGGACACACAAAAGATTGTTGAAAAATACGCCAACTCAAAGATTGAAATCCATACATTTAACCAGAGCCAGTTTCCTCGTTTAGTTATTGAAGATTTCCTGCCACTGCCCAGCAAAGGAATTTCTGGCAAAGATGGATGGTATCCCCCGGGCCATGGTGATGTTTTTCCAGCCTTGATGAATAGTGGCAAGCTCGATGAACTATTGTCTAAGGGCAAGGAATATGTGTTCATTGCCAATTCCGATAATTTGGGA…
>F01_transcript_1007
ATGGAGGGCTCTCCAACTCTTGGGAAACGGAAATTAACCAAAGAAAATGTAGAAACGGAAGCCACTAACCAGGAATCTGCCTCTAAGCGGCGTAATTCGACACGGACGTGTGTGCACGAGGTTGCTGTTCCAAGTGGGTACGCTTCTGTAAAAGATGAGTCCATTCATGGTACACTTTCAGATCCCATTTATACCGGGACAATGGCAAAAACATACCCATTTAATCTTGACCCATTTCAGAGTGTTTCAGTGGCATGTTTGGAACGGAATGAATCAGTTTTGGTTTCAGCACATACTTCGGCTGGCAAAACTGCTGTTGCTGAGTATGCAATTGCAATGTCTTTTAGAGATAAGCAAAGGGTAATATATACTTCACCCTTGAAAGCTTTGAGTAATCAG…
>F01_transcript_10070
ATGGTCTCAGCATTTTCTGTCCAACTAGTTTTCTCTGGCTCTATTCGTGCTTTCCAGGTTAGTTTTGAGCAAGACAGTTCATATGCACGCATGCAACCTATAAATTCTCATTCTATGAAGTTGGGATCAAGTAATTCCACTGATTCAACTTTTAGTTGCTCAGGAAGACTTTTTACATCAAGATATCATTATGCATCATGTTTTCCTGCCACACAACTTTGTAAACAACCTTCAATTGGTTACCGAAGATTGAAGTGCATAAACTTCGTGACAAACGATGTGGAGGTGCAAGCCAAGGTGACAACCAAGTGCTTCTTTGATGTAGAAATCGGGGGTGAATCTGTTGGTAGAATTACAACGGGCCTCTTTGGAGATGTTGTTCCCAAGGCTGTTGAGAAC…
>F01_transcript_100700
ATGAGGCCTCCACAAGTTCTTCGTGAAGGGACAAAGAAAACTGTTTTTGTCAACTTTATGGATCTCTGCAGAACAATGCATAGGCAGCCAGAGCATGTAATGACATTCTTGCTGGCTGAATTGGGTACAAGCGGGTCGCTTGATGGACAACAAAGATTAGTAGTTAAGGGAAGATTTGCACCGAAAAATTTTGAAGGGATTCTGCGGCGATATGTCAATGAATATGTTATTTGTAATGGCTGCAAAAGTCCAGATACAATTCTTTCGAAGGAGAATCGTCTCTTCTTTCTTCGATGTGAGAAGGTATATTTCCAACTGCACTGA
>F01_transcript_100704
ATGTCCGGTACTAGTTTTCATCACTCCAAAAGTGGTGGTCAGTTGGGTGGAGAACTTCTTATCACATGTCATTCTCTTCTAAATGGAAACCAGGTTTTCGATTTGGGTGAAGAGGCTCCGGACAAGGTGTTACGCAGACTGTATCTCACTCTAGAAACACTCAAGCTTAATGGAGACGAATTGGCCCCAAAGATTCAGGAGAGACTGAGAATAATTGTTGCAGGTGGGGATGGCACAGCGGGCTGGCTGCTCGGGGTTGTTTCTGATCTAAAATTATCTCATCCACCACCAATTGCAACAGTGCCCCTGGGAACAGGAAACAACCTCCCATTTGCTTTTGGTTGGGGAAAGAAGAATCCAGGAACAGACCGTAATTCTGTGCTGTCATTCTTGAGTCAA…
>F01_transcript_100706
ATGGCGGAGATCTACCAAGTTTTTCTAAAACTCCTAGACGGAAAAACCAAAACTCTTAATTTCACAACCCCTACAATCCCAATTAACGCCATCAAGACCCAAATCCAATGCATCACTTCAATCCCAATTCCCCATCAACTCCTCTTATCAAATGGTAAAGTCCTCCAAGACAACAAAGCCCTAGCAATAAATGACCAGTTCCCCTCGATCCACCTCCTCCTCCGCCTCCGCGGTGGCAAGGGTGGATTCGGGTCGCTCCTCCGTGGCGCCGCCACAAAAGCCGGGCAAAAAAAGACCAATAATTTCGACGCGTGTCGCGATATGAGTGGACGCAGGCTGAGGCATGTTAATGCGGAGAAGAAGATGGAGGAGTGGAAGGCCGATGCTGAGGAGAGAAGA…
>F01_transcript_100707
ATGCAGAGTTACCGACATCACGAATGGAGTTTCCCTAAATTGTCTCCCATGTGTCTGGTTCCTCTTCCTCGTGAGGGGTATGGGACTCCAGTAAGCTGGCCCGAAAGTAAATTGAAGGTATGTAATATGACTTTGACATGTTTTAGGTTTTGA
>F01_transcript_100708
ATGCAGGAAGGTGCGAGAGATCAATCAAGCCAGACAGATATGAGTAATTTGTTGGCAGACCAATCATTTGTGTCATCTATCCTTGCTTCGCTCCCTGGAGTTTATCTGAATGACCCTTCGGTTAAAGATTTGCTTGCATTTATGCAAAATCAGTTTGAGGTTAGTTTATTGATCTTGTAG
>F01_transcript_100710
ATGATACGCCAAAAGAAGATGGTTGGTCGGGCTCTTCTACTTGCTGGACCTCCTGGTTCTGGCAAGACAACACTTACCTTCGGTGTATCCCAGGAGCTTGGCTTTAGTATTAATTACATTAGTCACAGTTTCTTGCAACCATTCTATCAGTTGCTTATTTTATTTTACTGTCACAATTATCATGAATTCTGCTGCATACTTGATGTAATTTTAAACTTTGTTCTGTGCATCCCCAGGTATACCCCAGTTCGCTCTAATTCTCTTGTGAGAGAACTTAGATTATCTGAGCCAAATGATTTTATTCTCCCTGGGTACTCATCATATCTTGCTGTGCAATAA
>F01_transcript_100718
ATGGGAAGCAACCTAAAGGGTAGAACGGAGATGGAAGTTGGAGCTGATGGGGTGGCCATCATCACCATCATCAACCCTCCTGTCAATTCTCTTTCCGTTGATGTATTAAACAGCTTACAAGCAACTTATCAGCAAGCCTTACAAAGGGATGATGTGAAGGCAATAGTTGTTACAGGCACAGAAGGCAAATTTTCTGGTGGATTTGATATCACTGCCTTTGGAGGAATCCAAGGAGGAAAGACACCAGCACCCAAACCTGGTTTTGTGTCGGTAGAAATTCTTACTGACACTTTGGAAGCTGCAAGAAAACCCTCAGTAGCTGCTATTGATGGCCTTGCCTTGGGTGGAGGATTAGAGGTTGCTATGTCCTGCCATGCACGCATTTCTACTTCTAATGCA…
>F01_transcript_100720
ATGTTTGTGGATAGTCGGCCAATTAACAAGATTGCTGTTCCTTATTGCTTTCTTATACCCCGTTTGGATAATTTGCTTGATCAATTGGGTGGGGAAACAATGTTTAGCAAATTGGATTTGAAGAGTGGCTACCATCAAATTCGAATAAAACCTGATGATGAATGGAAGACGTCATTCAAAACCTGTGAAAGCTTGTACAAGTGGCTAGTGATGTCTTTTGGCATGTCCAATGCCCCTAGCACGTTTATGCACGTTATGAATCAATCATTGCACCCTTTCATCGGTAAATTTGTTGTGGTTTATTTTGACGATATCCTTATTTATAGTGCTAACCCTGAATATCATCTTTAA
>F01_transcript_100728
ATGGGTTCCAATAAGGCATTTCTTTTACTTGGTCTTTCTCTGGCTATTGTTCTTCTGATTAGTTCAGAGGTCGCAGCTAGAGAGTTGGTTGAAGCTCAGACCACCACTACCAACAAAAACACTGAGGCAGCTACTGTTGATGGGAGGAGCGGATATAATGGCTACGGCGGTGGAGGCTACAACGGCGGTGGAGGCTACCACGGCGGTGGAGGCTACCACGGCGGTGGAGGTTACCACGGCGGTGGAGGCTACCACGGCGGTGGAGGTTACCATGGTGGTGGTGGCCATGGTGGTGGTGGGTGCAGGTACGGATACTGCCATTATAGGTGCTGCAATTATGCAGGTGAGGTGGTGGACGCAGAGACTACCGAAGTCAAGCCTCAGAACTAG
>F01_transcript_10073
ATGGCATTTTATTCAGATAGTAATGGAAATCCTAAATTGAACGGCTCTGCAAGTTCTGTCAGATTTGATACAGAATCCCATACTGTTTCGAGATGGGTTGATATTGTATGCGACGAAAAGTGCAGAAATCTCATTGGGGATTCTATCCAGTTGTTTGTGAGCACTGCAGTTGCTGCTTATCTTGACAAGACCATGGATATCAACACCTATGAGGAGATCTTTGAAGGATTGACTAATCCGAAGCATGAAACAGAAGTAAGGGAGATGTTGGCCTCGATTTGTAATGGTGCAATAGAAACCTTTGTTAGAACATCTCACCAAGTCTTGACAAGTACAAATTCGAACGTTGATTCAAATACAGGTTCTTCTGGTTTAGCTATTGATCTTAGAGATGGTTGG…
>F01_transcript_100730
ATGTCTTCTACCGCTTTACGTGTTTTGGGCTTTGCATACGAGGAAGACCCATCAGAGTTTGCAACATATACTGGTGATGGAGACCATCCAGCTCATGATCTTTTACTCGATCCAACTAAATATTCTTCTATTGAGAGTAAACTAGTGTTTGCTGGTTTGGCCGGGCTAAGAGATCCTCCTATAAAAGAGGTTTGCCAGGTCTTTGAGGACTGCAGAGCAGCTGGCATTCAGGTTATGGTTATAACAGGAGATAATAAGAACACTGCTGAAGCCATTTGTCGTGAAATAGGACCAAATGAGGACATCCGTTCTAAAAGCCTAACAGGAAGGGAGTTCATGGATCATCATGACCAAAAAAGTCATTTAAGGCAGAATGGAGGGCTCCTCTTCTCTAGGGCG…
>F01_transcript_100732
ATGGCAGCAGCTATAGATAGTTATAATAGTAGCAGCAGCAGTCCTATTTTCCTAGATCCACTGAATGAAGAGCTTATGAAAGCACTTGAACCTTTTATGAAAGGTGCTTCTTCATCAGCCAATACCTCTCCTTCTTCACCTTCTCCTTCACCTTCTTCTTCCTACTACCCTTTTGACTCTTCTTTCTCATCGGAACCCAATTTCTACCCTGGATTTAGCACACCCCAATCGTCAACCCATATGTTTTCTCAAGGGTTTTCGAGTTTTAACCAAATGGGTATTGCTCAAACATGTTCAATTGGGCTCAACCAGCTCACCCCATCTCAGATCCTTCAAATCCAAGCCCAGATCCAATTCCAACAAGAACAAAACTACTTATCCTCATTACCTTCATCAAAT…
>F01_transcript_100743
ATGGAGGGTGGAAAGAGAGCAGAGGAGGCAGGACCATCATCTGGGTGTTCTTCTGTTCAAATTGGCGAGGAGGAAAAACATCAAAAGAAGGAAGCTTCTGATCAGACTGAGATAATAATGACTGGTGAGAGAGCTTTTGATGTTGAAGATGATGATGATCAAGAAGATGAAGATCTTCTTGACAATTTTGTTCCTGCACCTCCTATTCCTCTCAAAGACCAGCTTGACAAAGACAAGGATGATGAGAGCTTGAGGAGGTGGAAAGAGAAACTACTCGGTTGTTTGGAAAGCGATTTGGATGGACAAGTGGACCCTGAAGTTATATTCAACTCCATAGGAATTCTATCTGATGATTTTGGAGAGATTAATACTCCCTTGCCTGTAGACCAAGTTCAGAAT…
>F01_transcript_100744
ATGACAAAGAGTGAAGTTGATCATCAGGAAGATGGGTACAGATGGAGAAAGTACGGCCAAAAAGCTGTGAAAAACAGCCCTTTTCCTAGGAGTTACTATCGGTGCACTACTTCATCATGTAATGTTAAGAAGAGAGTGGGAGCGTTCTTTTGA
>F01_transcript_100748
ATGGCTTTTACAGCTGGAGGTGCTGCAAGACCTGGGAAAGTTGTGGGTTCGGTGTTGCGATACAACAACTGTGGAGCTGGAGCTGCAGCTGCAGCAGCAGAGTCTCTTGAACAGCGAAGAACCGGAAGAAATCCAGCTGTTCCAACTCAATATGCTGTTTCTAGCTCGTCTTACCCTAGAAGGAGCAACCCAGGTTGTAAAAACGATAGGGCTGAAGATAACATTGAAGGATCCAACGGCTTGCAGCCAAAACCTCCATACCTGGCAAGAAAAGTGGCTGCTGCTCAGGGTGGTTCTGGAAGTCGGTGGTATTGA
>F01_transcript_100754
ATGGAGGAGATGGTATTTTTTCCTGCCAATTTCATGCTACAAGCTCATCATCATGAAGAAGATAATGATAATGATGATCAGCGTCATCAACCCCACATGACTACCTCTCTCACTCCTCCAAATATCCTACCCCTTGAAGACTTCCATGGGGGTGTTGGTTCCTTTCTAGGGAAGAGATCATCATCATCATCATCCATGTCATTCTCATCAGCAGGCCGAATTCACGATGAAGATCAATTAGCCAATAATGGGGATCATGGTTTGTCTGATGAAGAAGAGGATGATGATGGATCACAATTAGGAGGACCGGGAGGAGGAGGAGGAGATAAGAAGAGAAGGCTTAACATGGAACAGGTGAAGACCCTTGAGAAAAACTTTGAGTTGGGGAACAAGCTTGAT…
>F01_transcript_100756
ATGAAGCTGCATGAAAATGGGCCTAATCTGAGTGTCCGAGGAAGTGATTACTATTGTGTTTCATCAGCAACTAGCGATGAAGGGTGTGGAACAAAAGCACCTGGGGTGGTTGCTAGACTTATGGGTTTGGATTCCTTGCCAACTTCAGATGTTGCTGAGCCCTATTCCACTCCAATTTTCAACTCTCACTCGTTTAGGGATTCTCATATTCCAAGGACTAGCACTGGTGTTCAAAGTGAGCGTCACCCCGTAGACTATGGTAACACAAGAAATAAGTTGGATGGATTCTCTAGCAATACAGTAGAACTTAGGCTGCAAAAGGTGCAGAACCGACCGATTGATAGGTTTCAAAGCGAAATATTGCCTCCAAAGTCTGCTAGATCCCGATCTGTTACTCAC…
>F01_transcript_100757
ATGGTGGAGGATGAGGAGTATCCAATTCAAAGTGAGGCAATGCTAGAAAATGAACCAAAAAGAGGGCTCAGTGGTTGTATTTGGGCACCAGTCAATTGGTTTAGAATGCTTGCTGGGGAAATGCATTGGAGTTTTGTTTTTGGGGTGCTGATGGTGTATGGAGTAAGTCAGGGATTGGGAGGAGCACTTGCCCGGGTAGGGACCGAGTATTACATGAAGGATGTGCAGAAAGTGCAGCCTTCTGAAGCACAGGTTTACTTTGGAATAACTAATATTCCTTGGCTTGTCAAGCCTCTTTGGGGTCTTCTCACAGATGTTGTCCCCATTGCTGGTTATCGTCGAAGGCCTTATTTCATATTCGCAGGCATTTTTGGTCTTATCTCCATGCTCTTTTTATCG…
>F01_transcript_100763
ATGCTTGTATGGGCAATTTTTCGCAGCCACGTTTCCTTTGCTTGGATAGGTCAAGATATTATTGGCATTGTGCTGATAATAATCGTTCTTCAAATCACACGAGTACCTAATCTCAAGACGAGTGTTGAAAGTCCTAAAAAATTTGGCATGTCACTAGAAAATTGTGTCGGAGAAACATGGTCCTCTTTTGTGGACAATCTAGCCAATGGTGACAACATTAACAACAAGAAGTTGAAGCAGTTCATTGATTATGCTGATGATAATGGCCCAAGATACTTGCTTCCACCTCATAATGATGATACACCAGAGAAATGA
>F01_transcript_100765
ATGACTGTGTTTGATGTCAGTGATAATTTTCTATCTGGTTCCATTCCCTTGTTCAATTACACTTCTTGTCCTCGCATTCCTTCCTTGAGCAGTCATCCATTTGAACCCTACACTCCAACTGCATATGTCTCATTTTTGGCGTATAGAACTCAGGAAGCAACCCCATTACCATTATTTGGAGATTTTGGTAATCTTGCAATAATGCACAACTTTGGTGGTAACAACTTTACTGGGACTTTCCAGTCAATACCAATTGCGCCTGAGAGATTGGGTGCACAGACTGTTTATGCATTTCTTGCTGGTCAAAACAAGTTCAGTGGACCATTTCCTGGAGGGCTATTTGCGGAGTGTGATAAGTTGAAGGTGTTGATTGTTAATGTCAGTGGAAATGGATTATCT…
>F01_transcript_100767
ATGATATTCACATTTGTTTGGGCTGGATGGGAAGGGATTGCACACGACTCACGAGTGCTAAAAGAAGTTGCATTTGATCCCTCTTCTGGTTTTCCATTTCCTCCCCCGGGTATATATTACAATTTCTTTTACCATTTTCAATTATTAGTTATTTTTGTCATAAAATTTCATCATTCAAGTTATTAA
>F01_transcript_100772
ATGCATTCTCATTCAGCTTCCTTGAGTAGGTCCAGTAGTAAGGTGGTTGCCCCTGCCGTATCAAAATTGATTCAAGCCTTTGAGTTAAAGAATCATGCTGATGACAGTGATGGAGAGGGCGTGCTATTTACTGAAAATCAATCACATGCTGATCCATACATGTTGACGAAAGAACAAACAGGAAATCTTAGGACCCTTCTGCAGGAACTGAGTGTGGATGCTAAGAATGCTAGTGAATTGTTCAAGGGGGAGAAACATGGTAAAATACTTTCAGACTTGACTGTCAAGGAGCTCAAAGTTCAGCACGACGCTTTGCAGGAAGAGAGTTACAATCTGGAAGAAGCAAAGATTGAACTTGTGGTTCTTTATGAACTAATAAGACAACATGTGTGCAATATT…
>F01_transcript_100779
ATGATTCACCCTGACACAAACTCGTGCATAGCTCATAATGTTTATGCCACATCAGCTACTTTCAGGAAAACTTTTCCATTGTACTTCTCTTTGACTTTTGTACCATTCGTAGTTCTGCGCCTTCAAAAGTTCATGGATTCTCCTCTCTGGACCTGCTGGCATGCTGTTACAGGAGCTGTTCGCTCAACAACTTTCTTGTCTGCTTTTGTCGGAGCCTTTCAGGGGGTTATATGTTTGCATAGAAAGGTGGCATTAAAAGACCACAAGCTGGTATATTGGGTTGCTGGCGGAATAGCTGCTCTCTCTGTACTTTTGGAGAAGAAAGCTAGACGAGGAGAACTTGCCTTATATGTTCTTCCACGAGCCGTAGATTCTTGGTGTATATATTAG
>F01_transcript_100785
ATGGAGAGGGAACAACAAAATGTGGATGATCCCTCTGAATGTTCTGAGTTGAAGACTGGTATACCTTCTAAGAAAAATAAGGTCGAGACCTCTAATGGTGAAGCTAGCCAATCATTTGGCATAAGGAGAAGTTATCGTTGCTTTGTGGTAACTGCAAGGGCACGCTCTTTTCTGTACCACCAGGAGCTCTTGGGTTGCTTTCCCTTCCTCAAGCTTCTCGGTTAA
>F01_transcript_100787
ATGGAGAAAGGAACAGCTTCTACGCTATTTGTTAATGATGGATCATTCATGGAGAGGTTCAAACAGCTTCAAGAGGAAAAGGAGAAAGGTGCCGCGAGATCGTCCCCAACTGTATTGGGGGTTGCAACTCCAAAGCCTGTTATTAGTAAGACTGGATCGGTTTCAAAAGTTAATGATTCTCGCAAACCCACTACAACTGCTTCTAGTGGGAAACTTGCATTCAGTCTGAAACCGAAGTCGAAGCTTGTGGCACCCCCTGTTAAATTAGATGAAGATGAAGATGAGGAGGAAAAGGATGCTGGATATGCATCAGGTAATGGACCAACGAAAAGGCAGAAACTGGGACAGGCTGATGCCTCTGTGCAATCATCAAAACAAGTTGATGTTGCACCACCATCC…
>F01_transcript_10079
ATGCGTTTCCACGCTACAGCAGCCACAGCAGCCGTAGCTCTGCTGGCAGGTTCTGTCCACGCAGATGCTCAATCTGTCCTCAGCGAAGCTAGCTCGTCTGCCTCCAGCGTTGCGACCGAAGCTTCATCTGCTGTTGAGTCTGCGACTTCTGGTACACCTGAATTGCCAACTTTCACGCCGACCACCATCAAGGCCGATTTTGTTGAGCAATTCACAGACGATTGGGAGACCCGATGGAAGCCATCCCATGCTAAGAAGGATACCAAGGGCTCTGGAAAGGAGGATGAGGAGTGGGCCTATGTTGGAGAATGGGCTGTAGAGGAGCCTCATGTCTTCAAGGGTATGGAGGGTGACAAGGGCCTTGTCGTCAAGAACGCCGCTGCTCACCACGCCATCTCC…
>F01_transcript_100791
ATGATGGTTCATGCCTTTCAAATATGCAATGTGTTGTCAACTCAGATGCTGAAGGTTATGAATCAGGTGGAGAGTGGCTTAACTACAACAGGTGCATCGGTATGTGTAGAAGGGATTTTGGTAACCAGTCAAGGCTCAAAGCAGAAAGTTGAGTTAAAGGTCGAGAAACTGGTGACGGTTGGTAAAAGTGATCCTTCATTTCCCATCCAAAAAAAGAGGGTCAGCAGAGAATTTTTGAGAACCAAGTCTCATCTTCGTCCAAGAACAAACACCTTTGGGGCGGTAGCGAGGGTGAGAAACGCTCTTGCTTATGCTACACACAAGTTTTTCCAAGAAAATGGCTTTGTCTGGATCTCAAGTCCTATTATCACTGCCTCTGATTGTGAAGGAGCTGGCGAG…
>F01_transcript_100792
ATGAATTATCCTCCATCATACGGAACTAATCAGCAATTTTATTCCAACAACCCGTCTATGCACACAATGTTAACTGCACAGCGGTTTCAACAGCTCGAAATCCATAATCAGAAGCAACATCATCAATTCCAGCAGCATCAACTGCATCAGTTCCAGCAGCAACCACTTAAGCAGCAGCAGCAGCAGGAACAACATCTATCTCATAGTGGTGACTTGAAAATGAAAGGTTCCATGTCATCTTCCAACAACAACCACTTTGATTTGATGTGA
>F01_transcript_100796
ATGACTCCTACATCTCCACTTTGCTCTGTGGAATTGAACTCATTCACTCTGGTACTACAGGTAACTTGCTTTGCAGAAGCTGGAGGACAGCATGTATCTGGAATGGCTAGGGCAGTGGAGTTGCTTGGATTACGCGCCTGTTTGACTCAGTCCATCATGGATACTGGTGAGGGTTTACCCGCTCCTTGGGCCATTCATACTACAGATCACTGTATTCAGTCCCAAAAGGAACTGTACAAGAAGCACCATAATACAGTGAATGGGCGCATCAGAATATGGCTGGGAATAAGGCAAATTATGAACTCAACTGATCGTTTACTTCTTGAAACGAGAGACACAGCAAAAGAACTGAAAACTGGAATCCATATGCATGTTGCAGAGATACCTTATGAGAATCAT…
>F01_transcript_100799
ATGGACTTAAGTTTCAATAGCTTTACGGGTACTCCAGACTCAATTTTCAATCTCTCCAAAATAGGAGTCATTGAAATGACTGACAACCATCTCTCAGGAAAACTTCCATCCGATATTGGCCGCAAACTACCCAATCTAACAACACTTAATATTGCAGGGAATAATTTCACAGGGATTTTACCTGACTCCATCTCAAATGCTACTAAACTAGAGCGTATAGTGATTTCTCGTAATAAATTCTCAGGTACAATTCCCAATTCACTAGGAAATTTGGAACTCCTCGAAATCCTCGGCTTTGAGGACAACAATTTCGTCATTGAAAAATCATCTTCGGAAATCAGCTTCATCACTAGCTTGACAAATTGTAGAAACTTGAGACTTTTAATTATATCACATAAT…
>F01_transcript_1008
ATGGATTTGTTACCGGCGGCAGAGTCGTCGTCGGAGATGGCGAAGATGAGAAAGCATGGGTTTAGGTCGTTGAAACTAGTAAACCTCAACATGGACGACCTTCTATCCGAAGACCCATTTGGAGTGGACTATGGTACACTTGACAATGGTCTCTCTTACTATGTCCGATCTAATTCCAAGCCCAAAATGAGGGCCGCTCTTGCTCTTGCTGTTAAAGTTGGCTCAGTTTTGGAAGAGGAGGAAGAGCGTGGTGTTGCACACATAGTTGAGCATCTTGCTTTCAGTGCCACTAAGAAATATAGAAATCATGATATTGTCAGATTTCTCGAAAGTATTGGGGCAGAATTTGGTGCTTGCCAAAATGCAGTGACATCTGCTGATGAAACTGTTTTTGAGTTG…
>F01_transcript_10080
ATGAACAACACCATGAACATGGAGGAGAGGCCGGAGACGGAGCTAATTTCGATTCCGGCGACCCCACGAGTTTCCACGCCGGAAATACTAACGCCGTCGGGGCAGAGGTCGCCGCGACTGGGGACGTCAAAAGAGGGGAAATCGTCTTCGGCGTGGACGCCGACGTCGTTTATTTCGCCGAGGTTTTTGAGTCCAATTGGGACGCCGATGAAAAGGGTGCTGATTAATATGAAAGGGTATTTGGAGGAAATGGGTCACTTAACTAAGCTTAATCCTCAAGATGCATGGCTTCCGATTACGGAGTCCCGGAATGGGAATGCCCATTACGCCGCTTTTCATAATCTCAACGCCGGCGTTGGGTTTCAGGCCTTAGTCATCCCTGTCGCATTCTCTTTCCTC…
>F01_transcript_100805
ATGTCCGGAGCTCGAGCTTCAAACCGCCAGGCAGCGTCACCTCATCAGCCGCCATCTAACAGCGACGGACAGATCCCACAGCCGACAAAGCGCCATCTTCAGTTCGCGTCGATGAAGCCGACATACGTTCCTCCCGAGGATTACCACCGCTTCTCTTCTGGAGATGCTAGAAGGGTCGCAGCCACCGCCGATCACGAAGCTGAAGCCACAGTAGTCAAATCTACTGTGAGATTTTCCGTACCACTTATTAATTATGATTTTTGTTGTTTAACTGATTATTAG
>F01_transcript_100811
ATGGGAGGCGGTCACAGAAATACCTACTCTGCAAATCCCAACGACTACAAACTTCTTGAAGAGATTGGTTACGGTGCCAGTGCGACTGTATATAGAGCGATCTATCTTCCCTCCAATGAAGTTATCGCCGTCAAGTGCCTGGATCTCGATCGCTGCAATAGCAATCTGGATGATATTCGCAGGGAAGCTCAAACAATGAGTTTGATAGATCACCCCAATGTAATAACGGCATATTGTTCATTTGTTGTTGACCGAAACCTTTGGGTTGTGATGCCTTTCATGGATGAAGGTTCGTGTCTACATCTCATGAAAACAGCATACCCAGATGGATTTGAGGAGTCTGCTATTGGTTCTTTCTTGAAAGAAACTCTCAAGGCCTTGGTATACCTACATCAACAT…
>F01_transcript_100812
ATGTTTCCCATCTGGGCCACCGGAATTCTCTTCTCAGCTGTTTATGCACAAATGTCTACAATGTTTGTGGAACAAGGGATGATGATGGACACGAGAATCGGTTCATTCACAATTCCTGCTGCTTCTCTTTCAACTTTTGATGTTATCAGTGTTATTTTCTGGGTCCCAGTCTACGATGCGGTCCTTGTCCCAATTGCAAGGAAATTTACGGGCAATGGAAGGGGCTTCTCAGAGTTGCAAAGGATGGGAATTGGCCTTTTTATTTCAGTCTTGTGCATGTCAGCTGAAGCTTTGGTGGAGATCAAGCGGCTGCAACTTGCAAGTGACCTTAGCTTGGTAGATGAAGCGGTCGCAGTACCACTTCGTATTTTGTGGCAAATACCCCAATATTTCTTGTTA…
>F01_transcript_100813
ATGATGACTAATCCGGATCCGAATTTGATCTTCTACGCCTGTATTGCGAAAGGTACCACCATTCTTGCTGAATTCAACTCAAAGGATGCGGATCTTGGCGCCCTAGCTCTCAAGTGTCTCGAGAAAATCCCTCAATTTCACTCCATATTCTCTCATACCATTCGAAACAAGATTTATATGTTCTTAATTGACAGCCCTTTTGTTTACTTTGGAATCTTCGATGCGAATCTTGAGAAATCGTCATGTGTTTCCTTCCTCAAGAGCGTAACGGGCTCGTTCAATCTCATTCTTGATCAAAATCCTCTCAAGAGATTGACTACTTTGAACCCTCATTGCTTCCAAGGGGAGTTCAATCCGGTGTTTCGCCAATTGTTGGCTTCGCCTTTGGATTTGGAAGGT…
>F01_transcript_100817
ATGTCATCCATCATCTCCAGCGTCTCTGAGGCTGGCCGACTGGTGACCTGTCTCGAGACGACGCCGTTCAGCAACTCAATTCACTTGTCTTCAGATTACAAGGCCTCAAGAGAAAGTTGGAAGAGGGGAGTCGTGCAGAGGCACTTGCAAGAACAGAGGTGCAGAGCACGGCTTGATCACTTGGAGTCTGGAGACACAGATAATTTATCTGAGTGGAACAATACGCGCTTAAAAAGGATACTGGTGGACTACATGTTGGCGGATGTCCTATTATGA
>F01_transcript_100819
ATGGCGAGCCCTCCGAATCCATGGAAAGCGGAATATGCGAAATCAGGGAGATCCTCATGCAAAACCTGCAAGAGTCCCATCGACAAAGACAAACTCAGGCTTGGCAAGATGGTCCAATCCTCCCATTTCGACGGCTTCATGCCTCTTTGGAACCATGCTGGTTGCATACTGAAGAAAGCGAAGCAGATAAAGTCTCCTGATGATGTTGAAGGCTTAGATTTGCTTCGATGGGAAGATCAACAGATGATAAGGAAATATGCGGAGGGTGGTGGGCCCCAAACTACTGCTGCTCCTGCAGCTGCAGAATCTGGGATTGAAGTTTCTCAAACCGCGCGTGCTACTTGTAGGCATTGCAACCAAAAGATCATGAAAGGAGAGGTCCGTGTATCAACCAAGACT…
>F01_transcript_10082
ATGGATAATATTGAGGAGGACATCCGTGCGTTGCAGCTTGATTCATCTGATTTGAGAGACGAGGTTAAAGAAAATTCCCAGCCGGTGCATTTGGAGCCAAAAGTTGCTCTGGAAGTGATAGAAAGAGAAATCTCTGCTCCAGAGGAAACTGAAAATGAGGTTGAAGATAATAAGAAGCGACACTTGAATGTAGTATTCATTGGCCATGTTGATGCTGGAAAGTCCACAATCGGAGGGCAAATATTATTCCTTAGCGGACAGGTTGATGAGCGTACTATCCAAAAGTACGAGAAAGAAGCGAAGGATAAAAGTAGAGAGAGCTGGTATATGGCATACATCATGGACACCAATGAAGAAGAAAGGGTTAAGGGAATAACAGTTGAAGTTGGAAGAGCACAC…
>F01_transcript_100822
ATGAGAGACCCTGTATACGGTTGTGTTGGGGCAATCTCTTACTTGCAGAATCAAGTATCTCAGTTACAAATGCAGCTAGCAGTTGCACAAGCAGAGATATTATGCTTCCACCAGTTGCACAAGCAGTTTGGTGATAAATGTCATTTTGCCCATGGTGAATGGGAACTTGGCAGGCCAACAGCTCCATCCCATGAAGACCCTGGTGCTATGGGACCAAGGCAAGGCAGTAGGTTCGGTGGCCACATGGAGCCAACCCCGCCAAGTCACACTATAATTTTATGCATGTTTAGGTAG
>F01_transcript_100824
ATGGTGTCGCTGAAGCTTCAGAAGCGGCTCTCCGCCAGCGTCCTCAAGTGTGGAAGGGGTAAAGTTTGGCTCGATCCAAATGAAGGCAACGAAATCTCTATGGCTAACTCTCGTCAGAACATAAGGAAGCTGATCAAGGATGGTTTTATCATCAGGAAACCAACCAAGATTCACTCCCGATCCCGTGCACGTCGGATGAAGGAGGCCAAGAAAAAGGGTCGTCATGCTGGATATGGTAAGCGCAAGGGTACAAGGGAGGCAAGGTTGCCAACTAAAATTCTATGGATGAGGAGGATGAGAGTTCTTAGGCGTTTGCTCCGTAAGTATAGGGAAGCGAAGAAGATTGACAAGCACATGTATCATGATATGCACATGAAAGTCAAAGGTAATGTTTACAAA…
>F01_transcript_100825
ATGGATTCAGAAATTACATCCCAAATTGGTGTAGAGAAAACCCTAGTTGTGAAGGTCTCTCCGCCTCCTGAAAAATCAGTGATTGAAGGTGAAAAAGTTTGTCTGGAAACGCATGTGGAAAAGACTACAATTAGTCCTAAAGAAGAGCTTCAATCGGTGGATGCATCCGACGTAAAATCCCTAAATGTGGAATCGAAAATTACAGACCGAGTAGAACAAACCCTAGTTGGGAAGTCATCTGCGCCACCTGAAAATGCCGTGATTGAAGCTGAAAAAACTGGTGGAGCAAAGACAAAAACTACGGTGAAGAAGACGATTCGGATTGTGAAGAAAATGGTGAGGAAGAAAATACCCAAAAAGATTAAGAAAGAGCATCGTGATTTGTTGAATGAGGTGCCA…
>F01_transcript_100828
ATGGTGAAAAAGCAAGTTCCTGATTGGCTCAACAGCTCTCTTTGGTCCACCGCTGCCCCGCCACCGCCGTCACCAACACCACAGGTAACATCCCCTCCACAACCGTTGCCACCACCAGATGACGACGTTTATAATCGGCCCACTCGCTCGTCCTCTGCCGCTACTTCCACTGATTTCCCGGTGGATTCGTCTGTTCCTGTTGCGCCACCCGCTGTGACTAAACCTCCTGAGCCTGTGAAGGCGAAAATTAGGGATCCGTTGTGTGGGAGTGATAGTGTGAGTTATCATGAGTATAATGGGAGCTCTACTAGCTCTTCGGTTAAAGATATTTCTCGCCAGGCTCAGCTATTACAAGAGCTTTTGTCACATACTCCTATGGTTCTTGAGTTCCTACTGCAG…
>F01_transcript_100829
ATGGACATAATTGGATGCCTTGAATACGACCCTGAGGTACCTCATGTTCATCATCGCAGTTTTTTAAAAGAGCATGTGGTATTCAAGGAGGCCATACCTATTAAAGATCCCCAAGTGTTGTCAAAGATACACCAGACATACAGAGATGTTGTTCTGCCCAGAGTTTTGGATGAAGCCACAATCGGAAGCCTCAATTCTATAGTTCATTCAAATAATGCATTTGTTGTTTCTATGCTGAAAGATGACAGCACCTTTATCCAGGAACTGTTTGCAAGGTTGAAAGCCCCCACCACTTCTGCAGAGTCAAGGAAAAATTTGGTGTTTTTCTTGCACGAGTTTTGTTGCCTAAGCAAGAGCTTGCAGATGGTACAGCAACTCCGGTTATTTAGGGATCTCATG…
>F01_transcript_10083
ATGGGAAGCGGAACTCTCTCCGATGTCGTCCGTCGTATGTTTCAGCGCCGATCTTCCGCCACCACCGTTAGCCGAAGTAGAAGAACAAACGACACCGTCAAACAGGATAGAAAAGAAGGATCAGAATTTCACATTTCTGGTCTAAAGCTCATCCAAGTTCCTGAAAGAACATTTTTCAGACTCGTCTCCACCGACACTCATAAATTGAGCATGCTTGACAAAGAATTTTTCACAGAATATGGTGAGGCAAGTCTTTATGAAATTCAAGAGGTTGTTGGCAAAGGAAGTTATGGTGTTGTTGCTGCTGCAGTTGATACTCACACTGGAGAAAGGGTGGCAATCAAAAAGATCAATGATGTTTTTGAGCATGTTTCAGATGCCACTCGCATCCTCAGAGAA…
>F01_transcript_100831
ATGGTAGATGTTACAGCGGCATATGTTAATCACTTGCTCCCTCTACTTTTGTGTCTGATTTTTTTGTTCGTAATGGCTACCTTACAGGTTAGCGCACGTCAATCTATTGTAGATGTTACACGTTTGCTTGTGAAGGCTGGCTTCCAAGATGCTGATTTGAGTGATTCCTTTTGGTTCAGGTATTGGTAA
>F01_transcript_100832
ATGGCGATCCACAAAACCTTAAAGAACAAACCCAAAAAACCCAGATCTCCAATTCTCATACTCACAGCCTCCATTGTTGCAGTTGCTCTCTTGTACCTTCTTTCTTCTCTCTGTTCCTCGTTTTCCACTACAAAAAACCTAAAAGAATTGGCTTCACTTAATCATGACAGACCACATTTAGGTGGGCATGAAAAATACTTGTATTGGGGCAACAGAATTGACTGTCCTGGAAAGCACTGTGGGTCTTGCGAGGGTTTAGGGCACCAGGAATCCAGCCTTAGGTGTGCCCTTGAAGAGGCCATGTTTCTTCAGAGAACTTTCATGATGCCTTCAAGGATGTGCATCAATCCAATACATAATAAGAAAGGGATTCTTCATCAGTCCAACAATGAAAGTTTA…
>F01_transcript_100833
ATGGAGTACATAGACAATTTGCCGGCAATGGATCTGATGCGGTCGGAGAAGATGACTTTTGTTCAGCTTATTATTCCCGTCGAGTCAGCTCACCGTGCCATCACTTACCTCGGCGAACTAGGCCTTCTTCAATTCCGTGACTTAAACGCTGACAAAAGCCCATTCCAACGGACATTTGTTAATCAGGTAAAAAGATGTGCAGAGATGTCAAGAAAACTACGGTTCTTTAAAGATCAAATACATAAAGCCAGTTTACCATCTTCTGCTCATCCGGGTATGCAACCAGATGTTGAGCTCGAGGAATTAGAGATACAACTTGCTGAGCATGAACATGAGCTAAATGAGATGAACAGTAACAGTGAGAAACTGCAACACACATTTAACGAGCTGCTAGAGTTC…
>F01_transcript_100834
ATGGAGACTGGTGGAAAAGTGAAGAAAGGTGCCGCCGGAAGGAAAGGAGGTGGTCCCAAGAAGAAGTCGGTGTCTCGCTCCGTCAAGGCCGGACTACAGTTCCCCGTCGGAAGAATCGGCCGGTACCTCAAAATAGGTCGTTATGCTAGGCGCGTCGGCTCCGGAGCTCCGGTCTACCTAGCTGCCGTTCTTGAGTACCTAGCTGCTGAGGTTTTAGAGTTGGCTGGAAATGCAGCGAGGGACAACAAGAAGAAAACGATTATACCAAGGCATGTTCTATTGGCTGTGAGGAATGATGAGGAGCTTGGAAGGCTTCTTGCTGGAGTTACAATTGCTCATGGAGGTGTGCTTCCCAACATTAACCCAGTTCTGTTACCGAAGAAGTCTGAGAAGGCAGCA…
>F01_transcript_100838
ATGGACTTGAATGCGTCTCCACTACCTGAAGGAGATGAAGTAATATACGAAGAGAGATTAGATAAACATTCAGCACGGCAAGAGCTCAGAGTGACAGCCACTGAAACTATGCACCAAGATACAGATGGAAGACATCATAGAATGAAAAGAAAACATCCAGACGAGGATTCAATTCATGTTTCTCAGCACTTTATGAATAATCTGGAATCCCAGTTTAGGGACAATGGATATGATAGGAATAGCCTTCCCTCTGGCTGGTTGAATTGCCCTGCTTTCGGTAATGAAATAGGCTTTATTATCCCTTCAAAAGTTCCTCTTGGCGAGTCCTTTAGTGAAAAAATTAGTCCTGGCAAAACATATACTCCAAGAGAAGTGATTCATCAACAAAGGCGCTTAGGA…
>F01_transcript_100839
ATGAGAAAGCTATTGCCAGTCTACTACCATGCCAATGATCAAATGGAGGATAGTCATCCAGGATGCATGTGGGGAATTTTTCATGTTCTTGACTACCATCATTGGCACGATAATGTCAAAAAGATGCTTCCCCACAGAAGGCACAACAAGCGAAAACATGCCAAACGCAATAAAAGTCCCAAGGCAATACTTGGTGTCCAGGATGCTGGCGAAGTTCCGAAACTTTTGGATGCTGAAGCAAGTCATTTCCTTGTAAATCAGCGTACCACAGAGGCTAACTCAACCCACAAAAAGTCTCTCAAAGCTCGCATAAAAGCACTAGTTGCTGAAGAGATTAGTAGGGAAGATGATTGCAAAAAACGAGGTTCAAAATTTCCTGCACGTTCAGGGCTGGGACGA…
>F01_transcript_10084
ATGGAGTCTTGGAGCTATGTTTCTGGGGAAAGAGGGTTTGCATCTGAAGAATCTGTTACAGCTTCTGATGTGATTGCAAGAGGCAAAAATGGATCAATGGATTGGGAATTGAAATCCCCTTTTTATAGTAGCAATATGGGATCCTCAAGCCAAGATGCCATTGAGAATATGGGATTTCTTGATTTGGGTTTCCAAGAAACCATGAGAAAATCTCTGCCTAATTGTTCAAATTCAATTAGGGATGCTTTAGGTAGCAAGCTTGGTGGAGTAAGATTATTCAATCCACTTACAGAAAATTCCTTTTGGGGTGAAGAAGATTCCAGTTCTAAGCTATCAAGCTCAGTTGTGGAATATAATTGTAGGGACTTAGCTCTCATTGATTTGAAGCTAGGAAGGTTT…
>F01_transcript_100841
ATGCTCTATACATATCATATAAATAACTTTGAGTTGGTTGGTAAGATGGGTGGAGCTTTTATTTTTTTAAAAAGTTTTTATAAGGAGGACCTTGATATTCCTTCATCTTCTTGGCCAGCAGTAGAGAATAAAAATAAGTGTTATTTGCAATATTTTTCGTACTTAATTTTTGTGAGTGCAGGTAAAGAGTCTCTGGTGGTAGAAGATTGTGGGTCCCCTGAAATCAAACCAATTTGTTCCAGGAATAATCCAAAAAGGAAGGTTGAAAGTTTGTCTGCTGAGGTCCATGCTGAGAATATAAGCACTGTTTCAAAGGTTTCTGCTGTTAAACGGACTAAGAAAGGAGTAAAACAGGCCCGAGCTGAGGAAACCATTGTTGACGTTAAAACCAAGCTACTT…
>F01_transcript_100842
ATGCTCAGTGTGGCCAACATGAAGCTTTCTGATATTAAGGGAGAAGTTTATGAAATTATAGAAGGATCTATTGATGATGAGGATCCGACACCAAACGCAGAATCTGTGCTCTGGTTACTTAGAGTTTTTGATGATGTAGGACACCACATTACAAAATACATCAAGGAAGATAAGTATAATGTTACTAAATATCAAGCAATCGAAGATGTTACGTGTATGCTTCAGGGAACTGACTTAACTCCTTTGGAGCTGTCAGATACTGATTTGAGTGTTTACAGCTGGTACCGCGATGAGGAACCTTCATACCCCTCGGAAGCTCCTTATGAAAATGTAAGGCTATTGCATGACGTTGGCATGGCACACTATTCTAAATCAGGATTTAGATGGGAGGTGTCATAT…
>F01_transcript_100844
ATGAGTGGAGCCGGAAAGAAAGTGGTGGATGTAGCATTCAAGGCATCGAAGAGCATAGATTGGGAAGGAATGGCGAAGATGCTCGTCTCCGATGAAGCTCGCAAGGAGTTCTACTCCCTCCGCCGTGCCTTCGATGAAGTCAACTCCACTCTCCAAACCAAATTCAGTCTGGAACCAGAACCTGTAGACTGGGAATACTACAGGAAAGGAATTGGCTCTCGCTTGGTTGATATGTACAAGGAAGCATATGATAGCATTGAAATTCCAAAGTATGTTGACACAGTCACTCCTCAATACAAACCAAAGTTTGATTCTTTGTTGGTGGAACTGAAAGAAGCAGAGCAGAAATCCTTGAAGGAGTCTGAAAGATTAGAAAAAGAAATTGCAGATGTCCAGGAA…
>F01_transcript_100845
ATGGGGAATTATACCCGAGCCATGCTTTGCTTGGTAAGAATTGAAACAGATCCAGCAGACAGAACGCAGCTCCGCATGAGGGTTGGCTCTGGGGATCCTACACTAACATACGAGTATATATGTATACTAAATCCAGATGTATATGTGTAG
>F01_transcript_10085
ATGTCATCAGATAAATGGTGCATAGAGAAAAGAGCTCCTCTTGCAAGTGATAATGCGGTAAAAGACAGTGAGAATGTTGGCGTTCCGGAAACTGGGAGTCTTTCCATTATTGTGCTTGGTGCTTCTGGTGATCTTGCCAAGAAAAAGACTTTCCCGGCGCTCTTTAATCTTTACCGTCAGGGATTCTTGCAGTCACATGAAGTATACATTTTTGGCTATGCAAGAACCAAGATTTCAGATGACGAGTTGAGAGATCGCATTCGTGGATATCTTACTCCGAGCAAGAATTCTGCAGGGGGACACTCGGAAGATGTATCAAAGTTTCTGCAATTGATCAAATACGTTTGTGGTTCTTATGATGTGGAGGAGGGTTATCGGGCATTGGATAAGGAAATATCT…
>F01_transcript_100853
ATGCCTAGATATGATTTCAGTTCCATGATTCTTAGCACAATCAAGAAAGGAAAAATTGTTCCTTCAGAAGTGACAATCAAACTGATTCAAAGGGCAATTGAATCCACTGAAAATGATAAATTCCTAATTGATGGGTTTCCAAGAACTGAAGCGAATCGCATCGCCTATGAACGTATTGTGAGTTCCTTATGGTTTATGGAAACTCTCTCCTCATTCTGCCCATGTACCGTATGTTCCAAGGGTAGTGCTGCAAAAATTAACCTAAAACCAAAGAATCTGAAATTACTTGTTTCATCATACTGTTGTTGCAGGATTGTAACTATAAGAATGTTTGTGCAGATTGGAGCAGAACCAAATATTGTTCTTTTCTTTGATTGCCCTGAAGAAGAGATGGTGAAA…
>F01_transcript_100854
ATGTCAAGCACTGCCGGTCAGATCATTCGTTGTAAAGCTGCTGTGGCATGGGAAGCAGGGAAGCCTCTTGTGATTGAGGAAGTAGAGGTAGCCCCTCCACAGAAAAATGAAGTTCGTATGAAAATCTTGTTTACTTCCCTTTGCCACACCGATATTTACTTCTGGGAAGCCAAGGGTCAGCATCCTGTTTTTCCTCGTATTTTTGGTCACGAAGCAGGAGGGATTGTGGAGAGTGTTGGAGAAGGCGTGACCGATCTAGCACCTGGTGATCATGTCCTCCCTGTCTTCACTGGGGAATGCAAAGACTGTGCTCATTGCAAATCAGAAGAAAGTAATATGTGTGATCTCCTAAGGATCAACACTGACAGAGGAGTGATGCTTAATGATGGAAAATCGCGT…
>F01_transcript_100855
ATGTCGGAATTAAAGAAACTGCTATATACCCTTCTGATGGGGAAGACTTCTTTAACAATCTTCCAAGTCCAAAAGCTGATACACCTGTGTCAGCTTCTGGCAACAACTTTAATGGGGAAAACTCTATTTCTGGTGGGGGAAGAAATGCAACAACAAATTGATGAACAAGAAGAGACTACTGATCCTTCGTTTGATGATGCTGTTCAACGTGCTTTGGTTGTTGGAGACTACAAGAGTGCTGTTGCTCAGTGCTTAACTGCAAACAGGATTGCAGATGCTCTAGTTATTGCACATGTTGGTGGGGCTTCCTTGTGGGAGAACACACGTGACCAATACCTAAAGATTAGTCATTCTCCTTACCTTAAGGTTGTTGCTGCTATGGTGAACAATGATCTCATG…
>F01_transcript_100857
ATGGGTGCGGGTGGCCGTATGTCTGCTCCCCCTACCGGCAAGAAGACCGAAGCCGAAGCCCTTCGACGAGCTCCTCATGAGAAACCTCCGTTCACAATTGGAGACTTAAAGAAAGCCGTTCCACCCCATTGCTTCCAAAAGTCTCTTATTACCTCTTTCCGATACCTTATTCAGGATCTCATCATGGCCTACACCCTCTACTATGTTGCAACAAATTATATCGACCTCCTCCCCCGTCCTCTTAACTACTTGGGTTGGGCCGCTTACATTGCTGTTCAAGGGTGTGTCCTAACTGGGGCCTGGGTTGTAGGCCACGAGTGTGACCACCATGCCTTTAGTGACTACCAATGGGTCGACGACCTTGTTGGCCTTGTTGTCCATTCATCTCTTCTCGTCCCT…
>F01_transcript_100859
ATGCCAATCAGTCGACAAAGATTTTCAATTAATAATAGGAACTTTGCCAGTCAATCTTCTCTGCCAAATCCAGATAGAGCAGGACCATCAGATTTTCATTCACTTTCAGACTCTTGGAAATCTCGACTGAATGCTATGTCAACAAAATACAAGGACTCGATTTCTAAAGTACAAGAGTATGGAAGGGAGAAGCTGTTCTCTCGAAGTACTTCCATGGCAGATATTGGTTCTGAAGTTAGGACAGAAGTTAATGCAGGAATTGCTAATGTATCTCGCATGATGGAGCGCCTTGGAACTAGAGAAAATGATGGAGACTGCGTTTCCTTACCCGAAAATCTTGTCGAGTCATCAGCTACAGAACAGACCAGACACCAATAA
>F01_transcript_100861
ATGGCTGCTGCAAATTCAATATGCCAGAGCAGGACCCTGATCAATATAACCTCTCTCTACTATTTGTTTAGTCTTGAAAAGAAGAAGAAACCCCTTCTCCACCAGCAGCACCCGCACCCTCCTCAATTCGAGTTCCCTCATCATCATAATATGAATATCAATTCCAACAGTAGTCGGGCTGCTGCAATCATCACCATCTCTGCAACTGGAGGTTCGTCAACTGCCAAGACATCCGTTGACTCTCCGCCACCCGATCATCATCATCATCTTCCCCAACTTCAGCCAAACAACGACGACAACTTTACTAACCTCTCTCCTACTTCCTCTCAGTGGTCTGAGTTTGCCAAAAATGTGTCCGGTGAATGGGATGGTTATGGAGCAGAATTTTCACCTGAAGGG…
>F01_transcript_100862
ATGGAAGCAAAAGAGGCAGCAGGTTCTTCACTAGATTCATTAATGTCCTCCTTCAACACCCGCATAGCAGAGCTCCAAGAACTCGTCATAGCTCGCAACATGTACCCAGCCAGCAGTATTACCGATCTGTCGGCCGTTGACGCCGTATTGAAGGCTACGGAGCTTCAGGTTCAGCAAATCAAAGATCGGTTGCGCGAAGAGACCGAAGCCATCCCCAAAGCCAAAAAACTGATTGATGCATCACTACGGCAACAAAAGAAATTACAGAATATGTCTGCTTATGTGCCATTATATTTACCAGAAAGAGTTTCAACTATAAATCAGGACAACACTAAATGTCTGCTGCCTGAAGCTTCCAAACAGGATCTTGCTTTTAGCTCAATGAAACTTGAGGAGCCT…
>F01_transcript_100864
ATGGATATAAATCCAAGACCTTTTGATCCTGTTATCTTATGGGACCAAGAAAATCATGTATCTTCTGACTTATGGCAACATATTGTGGAGTTAATTCCTTTGTTGCTTTGTATGTCAAATCCTAAAGCAAAGTGGCCAAGATCGAAGCCGAAAGTTAAAGTCTGTGTGAGTAGGCCGAGGCAATGGAATTCAGACGATTGTGGCGTTTATGTTACAAAATAA
>F01_transcript_10087
ATGTATTTTGTTCTCTCTTCTCTGTACTTTCTCTTTCTTCGACTTCCCGACTCTCTCTCTCAAATCCACGACTTCCCCAACTCTCTCTCAAATCCACGACTTCCCCAACTCTCTCTCAAATCCACGACTATTATCAAATCGGCATTTAGTTTTTCCAATTTCACTGTTCAGAATTTTGAATTCGACGATCTAGGGTTTAAGGAACTGGTTCGGTCAATGAACGGGTACAAGGAAGAACAGCAGCAGCAGGGGAGTGGGAAATCTAAATCATCGACTCTGATTACCCGGGATTTACTGGGTAGTTGTTCCACCATTGATTCCAAAGAATTAGACCTGGACTTGCAAGTTCCTTTTGGGTATGAAAAGTGGCTCGATTTGAAGCCTCCAAGGTATGATGAG…
>F01_transcript_100870
ATGGAAAAACTCTATGGTTGGGGATGGAATAAGTTCGGACAGGTTGGTGTTGGTGATTATATTGATCATTGCTCTCCGGTGCAAGTTAAATTGCCACATGAGCAGAAAGTAGTTCAGATATCGTGTGGGTGGAGGCACACGCTCGCTGTCACTGAAAAACAGAATGTATTTTCATGGGGAAGAGGTACAAATGGACAACTTGGGCACAGGGAATCTATTGATGGGGGAGCATGCTCAGCACACAGTACCCACTCCCTGGTGTCATCAAAAGGTAACCTTAAATCAGCTTTTGGGGACAACCTATTGCCCTCATTTATGAGAGAACCACATTTTGAGTCGCAGATACTCTGA
>F01_transcript_100874
ATGACAGAGAATTCATCACCATCTCCAAAACCTATCCAAACAATGGAACCAACAATAATTCAGCAGCAGAACCCATCAACATCATCCAACAATAACCTAGCTGCTTTGGCCTCTCCTATTTCAATCGATATCCCTCAAATTACATCTTTACAACAACAGCAACAGCTCCAACAGAATAATTTGATGGCCGCATCAAATTTTCAAATACAGAGATCGCCATCAATGTCCAGGTTAAATCAAATTCAGCAACAGCAACAGTATAATTTGGCCACCGGTATTCGGCAACAAGCTGCGGTCGGAATTAGTGGCCAGATGAGTTTCGGTGGAAATTCTCAGCTGCAACAACAAAATAGTCAGCAACAACAAATGGGTCAAATTGGAAATGCCAATTTAACCCGG…
>F01_transcript_100875
ATGGACAACAATGGTTTCAGCTCATGCCCGAGCAGGGATTTGAGTTCTGCGAGGAGATTGTTTGATGAGATGCTGGAAAGGAATACTGCTACTTGGAATTCTTTGATTGATGGATATGCAAGAGTGGGGGATGTGGAAAATGCTGAGTTCTTGTTTAAAGAGATGCCCAAAAAGGATTTGATTTCATGGACGACGATGATCACTTGTTACTCTCAGAACAAGCTTTATAGAGAAGCACTGTCTGTTTTTAGGGAAATGAGGACCAGTGGGATTAGACCCGACGAAATGACCATGACCATTGTTATTTCAACCTGTGCTCATCTAGGGGCTCTCGACCTCGGGAAGGAAATTCATCTTTATGTTATGCAAAATGGTTTTGATCTTGACGTTTATATTGGA…
>F01_transcript_10088
ATGTTCTCTAGCTCTATTGTATTGTGCCAACGTGGCTCTTGTGATTTCTCAACGAAGGCAGTAGTTGCACAATCAGGAGGTGCAGCTGGCATGTTGGTGATAAATAATGAAGAAGATGGGCTTCCTGTGATGGATTGTCCTAACAACACTCAAACTTTAAATATTACTATTCCTTCTGTTGTTATCATAAAGTCAGATGGAGAGGCTTTGAACAAAGCTATGACAGGCGGAAGCAGAGTGGAACTCCTATTATATGCTCCAGTTCGTCCAGTGGTGGACATATCGGTGATATTCTTATGGTTGATGGCTGTTGGGACTGTAGCCTGTGCTTCACTTTGGTCAGAGTTTACTGCAATGGAGAAAAGTGAAGGGAGCTATAGTGAACTGCCACCAAAGGAA…
>F01_transcript_100881
ATGGTGCAGATTTTGCCATCTTCATCAACACAGCACAGGAATTTTGATGGAAGTGATTCCGGTGCCCATCCAGATGAAGCTGTATCTTGGGGGAAAATTCGTGGTTCTGCCAAGACTGTAAAGGTACACTGTGATGCAACTATTGCCTTCCCTCTACTGGTTTGCAGAAAACATTTGCAGCAAGGAGAAAGAACTATCCTGAGGCTAAGCCCTGACACTTGTTTCGGTGGGATGCAGAATCAGCATTCTATACTGACTGACCATTTAAGAAAAACCGGTGTTTTTGTTAGAAACTATAAATTAGTTGATTTATAG
>F01_transcript_100883
ATGCCTCGATATGATGATCGTTATGGTACCACACGTTTATATGTTGGCCGCTTGTCTTCTCGAACACGATCACGTGATCTGGAGCACATCTTCAGCAGATATGGGAGAGTACGAGATGTGGATATGAAGCACGACTTTGCTTTCGTTGAATTTAGTGATCCCCGGGATGCTGATGATGCTAGGTATAGCTTAAATGGTCGGGAAGTTGATGGAAGTCGTCTGATAGTGGAATTTGCCAAGGGAGTCCCACGTGGACCAGGTGGTTCTCGAGAATATCTGGGCAGAGGTCCCCCTCCTGGGTCTGGACGCTGCTTCAACTGTGGTCTTGATGGTCATTGGGCTCGAGATTGTAAAGCAGGGGATTGGAAGAACAAATGTTATCGATGTGGAGAAAGAGGT…
>F01_transcript_100885
ATGAGGTCCATTCCACTTGTCAGATCCTTTCGTGCCTGGCCCAATCTTCCTAAAATCGCAGGGTCATTGCAATCTCGTTCGTTCCAACCAGATTTTATTCCCAGAGATCCTAATGCCAAACCCAAAAGGTACAAGTACCCCCCATTCTATGACCCTTATGGCCCTAGACCCCCACCTTCTGATAAGATAGTTCAGCTTGCTGAGAAAATTGCTGCTTTACCCTTTGAAGAATGTAATCAGATTGGCTCCGTTCTTATAGAGAGAACAAGGCATCCAAAGTTGCAGCAAATTTCTGTTGAAGGTGTGGACTTGAGTTCCCAAGGAGCGCCAGGTGCTACGAAGGGGGAGGAGAAGAAAGCTGAGAAAACAACATTTGATGTTAAGTTAGAGAAATTTGAT…
>F01_transcript_100893
ATGTTGAAGATGCGCCAGCAACTGGAGTGTTTGCAGATAGAACTTTGTGCACGTGGTGGAGGAGAATCATCTAACAAATTCCAGGCTCTCAAGGATAGGATTGCTTGGCTTGAAGCTACTAATGAGGATCTTTGTCGTGAACTTTGTGGATATCGCAGCAGATCAACTATTATAGATCAATGTGGAACAGATGCTAAGATTGGGGACATTGTTTCTGTGAAAAGTGAAGGGCTTAAAACGGGCTTGCAGAGTATGGACTCTCCAAATTACCAAATGGGTGAAAATGGTTATCATAAAAGATTTTGTATCCAGAGCTGTTAG
>F01_transcript_100894
ATGAGTTTTTATGTACAAGGTCGACTCACTCTTACTTTTCTTGAAGTTGTGCTGGATAAAATTCTTGTCAATCTTCTCGTACCAAGTTCTAGGAGCTTGTTTAACTCCATAAAGAGCTTTCTGCAATTTGTAGACTTTGTTTTCCATCCTTTTGACTTAAAAGCCTTTCGGTTGCTCAACATATACGTTTTCTTCTAA
>F01_transcript_100895
ATGTATTGTGTGGTTTTAATTGTGAAGTCAGTGATTGTATCAGCTGGTCTGCTCAGGATTTTTGGAAGAGAGGCCGCTGAACTTCCTATCGTAGCTACAAGAAGAGATAACCAAGGAAAAGGTTATTTCCAAGCACTATTTTCATGTATAGAGGGGTTATTGGTCTCCATGAATGTTAAAAATATAGTGCTCCCTGCTGCTGAAGATTCTGAATCTATATGGACAATGAAATTGGGCTTCAAAAAGATGAGCGATGAGCAGCTATTAAAGTATACAAGGGACCTCCAGTTGACAATATTCAAGGGAACTTCAATGTTAGAGAAGGAGGTGCAGCATGCTGCAGATTAG
>F01_transcript_100896
ATGGCGAAGAATCAGCAGAAAGTTCACGCAATTATGATTCCATACCCATTCCAAGGTCACGTTATCCCCTTCGTACATCTCGCCATTAAGCTTGCCTCAAGAGGCTTCACCATCACCTTCGTCAACACTCATTCCATCCACCAGCAGATTTCCAAAGCTCAAAGCACCGACGCCGGAGATATCTTTGCCGGAGCACGTGAATCCGGTCTCGACATCCGTTACGCCACCGTGAGCGACGGCCTGCCGCTAGAATTCGATCGGTCTCTCAACCATGACCAGCACCAAGAGTCTCTGTTGCAGGTCTCTTCAGCTCATGTGGATGAACTCGTCGGGAAATTGGTGTGCTCCGGTTACCCTCCGGTCAGTTGCTTGATTGCTGACACTTTTTTCGTATGGCCT…
>F01_transcript_100897
ATGGGGTTTTCAGAGATTTTCTGTGTTCTGGGATGGTTTGCAATCTTATTCTCCAAGGGCCCTTGGTGGCTTGACTCTGGAAGATTGTCAATAGGTTATGGAATTGGGATTCTTTCATATGTGGTACCTGTTTACATAGCAGAAATAACACCTAAGAATCTTCGAGGAATGTTTACGACTGTTAATCAGTTGATGATATGTTGTGGCGTATCAGTAATGTATATATTTGGAACTCTTATTCCCTGGCGTATCTTGACTATAATTGGCATCGTCCCATGTATACTACATCTTCTTGGCCTACTCTTCATCCCCGAGTCCCCTAGGTGGCTGGCAAAGATTGGACGGGGGAGAGACTGTGAATCTGCTCTACAGCGCCTTAGGGGCAAGAATGCAGACATA…
>F01_transcript_100898
ATGGTGAATTCAATGGTGGAAAGAGCTACGAGCGACATGCTCATCGGTCCAGATTGGGCCATGAACATCGAGATCTGTGACATTTGCAATCGCGATCCTGTGCAAGCGAAGGATGTTGTGAGAGGCATAAAAAGGCGTATTGGAAGCAAAAATTCCAAAGTCCAACTTCTTGCCCTAACACTATTGGAAACAATCGTCAAGAACTGTGGGGACATTGTCCAGATGCATGTAGCTGAGAAGGATGTGCTTCATGAGATGGTGAAGATAGTGAGAAAGAAGCCTGACTTTCATGTAAAAGAGAAGATATTGATTTTAATAGATACTTGGCAAGAAGTTTTTGGAGGAGCAAGGGCAAGACATCCCCAATACTTTGCAGCATACCAGGAGTTGTTGCATATG…
>F01_transcript_100899
ATGATACTTCAATGGAGATTGGCACTTGTTGCTTTGGGTACACTGCCTATTTTAACCGTTTCTGCTATTGCACAGAAATTGTGGCTTGCTGGATTCTCAAAAGGCATACAAGAGATGCACAGGAAGGCATCATTGGTCCTTGAAGATGCGGTTAGAAATATTTACACTGTTGTGGCATTCTGTGCCGGAAACAAGGTAATGGAGCTTTACAGGATGCAATTACGCAAAATCTTCAAACAGAGCTTCCTTCATGGAATGGCTATTGGTTTTGCTTTCGGCTTATCACAGTTTCTTCTTTTTGCCTGCAACGCTCTTCTTCTCTGGTATACTGCAATCTCTGTTAAAAAGAACTACATGAGTCTTCCAACAGCTCTCAAGGAGTACATGGTGTTTTCTTTT…
>F01_transcript_1009
ATGGACGGAAAATATAAGCCGAAGGTTCCAAATGACATCGTTGGGAATCAGTCACTGGTGAAGCAGCTTCATGACTGGCTTGTGCAGTGGAATGAGCAGTTCTTGAATACCGGAAATAAGGGGAAAGGCAAAAAACAGATCAATTCTGGCGCTAAAAAAGCTGTGCTCTTAAGTGGTACGCCTGGCATAGGGAAGACTACGTCTGCAAAGTTAGTAAGTCAGATGCTCGGTTATGTAACAATTGAGGTAAATGCTAGCGACAGTCGTGGAAAGGCTGATGGCAAAATTGAAAAAGGAATTGGTGGAAGTACTGCAAATTCTATCAAGGAACTTGTTAGCAACGAAGCCTTGACTGTTAATATGGATCGCTCAAAGCATCAAAAGACTGCGCTGATTATG…
>F01_transcript_100900
ATGTCGACCTGTTGCAGACCTGCAATTTCCTCAATTTCGATCCAAAAAAGCTTCGTATCACCGAGAAGAATCTCAAATAGCGTCAATTTTTTCGGTCAAAATTCAGTGAGAATTAGGGTTTGTGGTGTGAGCGCTTCAATGGTGGAATCCTATGAGAATTCCTCCAACTTTATTAAGCGTATGGAACGAGCCTGGTTGATCTCTCAGCAAATATTCAGATTTTTTGAAGCACTGGAATTTGGAACAACTGTTATATTTACTTCCAAAAATGGTGAGAGAGTTGCAGATGAAGTAAATGAAGAATATAGAATGAATGAAGAAGTTTTGCCCGTTTATTTAATCTCATAA
>F01_transcript_100903
ATGGACAGGTGTTTCCTGGAGCTGCAGGTTGACGGTGAGGAGGCTTACCAAACATTTCAAAGAGTTATTGGAAATGCAGATGTCATCATGGCAACCTACGAGGATCCCCTCCTCGGTGATGTTCATGACAACCTAAGCTTTTTTGCACATGCTTAA
>F01_transcript_100905
ATGTTGCATACTGGAGATATAGGGTTGTGGTTACCCGGAGGTCGACTTAAGATCATTGATAGGAAGAAGAACATTTTCAAACTGGCGCAGGGAGAATACGTAGCTCCTGAGAAACTTGAGAATGTATATGCTAAGTGCAAGTTTGTTGCACAGTGCTTCATATATGGTGACAGCACTAAATCCGCTTTGGTTGCTGTTGTCTCGTTAGACCAGGATGTATTGAAACCATGGGCAGTAGCTGAAGGTATCAAGTATGAAAATTTAGAACAACTATGCAAGGACCCAAGAACAAAGGCCGCCGTCTTGGCTGAAATGGACAATGTGGGAAGAGAAGCTCAGCTGAGAGGCTTCGAATTTGCTAAAGCTGTGACCTTGGTGCTTGAACCGTTTACTTTGGAT…
>F01_transcript_100906
ATGGAAACAACAATAAATATAGCTCATGCATGCAAGTTGATTAATAATGACATGAAACAGTTTGTAATCAGTTCAGAAACTGACGCGATCAGAGAAATTGAGAGAAAAGTGACCAAGTGGAGATTGCACGTTTTATCAGAGATGCAGTTAAAAATGATCTAA
>F01_transcript_100907
ATGTGTTTTGCCGAGTATTACATGATGAATTACTTTCCTGAAGAGGTGCTAGAGCATGTCTTTAATTTCTTGACATCGCATCGAGACCGAAATGCGGTGTCTTTGGTCTGCCAATCATGGTACAGGGTGGAGAGATATAGCAGGGAGAGGGTTTTTATTGGGAATTGTTATGCAATCAGTCCGGAGAGGATGATCGGAGGTTTCCCAGGGTTAGGTCTTTGA
>F01_transcript_100912
ATGACCGACGACGAGTGGGTAAAAGCGGCCACCGCTAACGATTTCTTGGTGGTTGACCTTCTCTTGCGTCTCTCCCATTCATCGCCTACACCTCCGCCTCCGCCTCCGCCGTCATCCTCATATTTGCAGCTCCACTGGTGCGTTCGACAGCCTCGTTCCAAGTCGATTGCTCTCAAACCAGGTATCGCGAGGGCCAGCCCGACCACTCCGCTCTCGTGGAGTGGTGCCACCTCGCAGAGCGGCGGCGCTGGTGGTGTCGGTGTCGTCGACGTCTCGGAGGAGTCCAGCCGACCAGCTCCGGGATCTAAGGTAATTGGAACAAGCGAAGCAACCCCCACTAAGAGGCCAAGAAAGAAGAAGACAATGACTGAACTAAAAGAGGAGGAGGTCACTCTGCTA…
>F01_transcript_100913
ATGATAGAAGCTTACTTGCGTGCTAATAAAATGTTTGTGGATTATAACGAGCCTCAACAAGAAAGAACATACTCATCTTACTTAAGTCTAGAACTTGAAGAAGTTGAACCCTGTGTTTCAAGGCCAAAGTGGTGTACATTTTTGTGCTCACTAAAAATTGCTGCCACTGATTGGTATTTTTTATGTTCGAAGGGTATTTTAAAGCCTGGAATGCTGATGACTGAGCTATGTGAGACCTTGGAGAATACCGTTCGCAAGTTAAACTGGGTTCCAGCCCATTGGACCCCTAATTCTGGAGATAAAACTGTGCTGCAGTATGATGATGTGATGAAATTTTATTTTGGAACTCATATAGATGGACATATAATTGACTCTGCATTTACAGTGGCGTTAAATCCG…
>F01_transcript_100914
ATGCCCCAATATGTTGAAGCGGAGACGGAGTTATCAGATTCTGCCTCTTCCACTTCTGCCGGGGGCATAGAAAGAAAGGATAGAGCTTCCACATTTGGGTATAGAAATTTTGACCGATCATCAAACTGGCATTTAGAATATGTCAAAAAAATACTCATCAATGCAGAGTTGATGCTAGAGGATTTTGTATTGGATCAGGCACAAGAAATCATAACTCCAGATCTGTTTGATCAGTTAGAGATTTTAAATAGTGGGTCTGATAAAACTGTGGAAGAACACTATAAACACGAACGAAAGCTTTTGTTTGACTGCCTGAGTGAATGCCTAGAATTCAGATGTCAGCGGATCTTTGGTGGAAGTTACAAGTCATGGATTAAATTGACCGCAATGTTTCGGGGG…
>F01_transcript_100922
ATGAGGAGATTACAGCAGATACTTGGTCGGAAACACCAGCGTAACCTTCACGCAATATATGTGCTTCACCCAACCTTTGGACTGAAAGCTACAATTTTCGCATTGCAAATGTTTGTGGATGGTGTGGTGTGGAAAAAAGTTGTGTATGTCGATAGGCTTCTGCAGCTATTCAAATATGTTCCACGGGAGCAGCTAACCATCCCCGACTTTGTGTTCCAGCATGATTTAGAAGTTAATGGTGGGAAGGGTCTAATTGTGGATCCCAGAACAAAATATGTATATCAACGACCATAG
>F01_transcript_100923
ATGAGGCTCCTAATGCCCTGGGAATCAATAAGAACACTGCATTTTATTCGCCTGCGTTTCTCTTGCACAACCTCACTCAAGCCACCATTTACTGTTTTTTCCGCTTGGGTCAAGATAGATGGTGCAGATTTAGGTCTAATACGGGCAAGCCTAATGACAGAAAATACAACACATAACTGTATAGGGACTGTGGTGGCGAAGCGTGGATGCTGGTCATTTCTCAAGGGCGGATTTGTGTTGAGCTCACCAGAAAACTTTGCTCTTCTATACTTTCAGAATTCAGATGATCGAGACATCAATATAGCAGTTACAAGTGCTTCTTTGCAGCCATTTACCGAGCAGCAGTGGAGATTCAATCAACAGTACAAAATTAACACGGAAAGGAAGCGTGCCGTGACA…
>F01_transcript_100926
ATGGTGAGAGGTTTACTAAACAAGATCGCTTCTAAGTCTCTCTCTGTAGCCGGAAAATGGCAGCAACACCAGCTCCGTCGTCTCAACATCCATGAATATCATCAGGAGCATGGAAAGCAGGAAAAATCAGCCTCCAGTGTAGACGATTCAGGGAAGGTACATTTATCATCATTTGTTGGGGCATGA
>F01_transcript_100928
ATGTCTGTTGATCTATATGGGTGTTGTAACCAAGGTTTCCCATTTTACTTTCAGATTGTTGGCCATTCACATGGTGGTGGTACTGCTGCACTCTTAACATATATTTTCGGGAACAGAAAGAGTTTTCCTCAACCACTTGAATCACATTTGCACTAG
>F01_transcript_100929
ATGGAAGAAGGCATAGCTGGAACAGCTCTCGGCAGCCTTAAACAGTCTGTAGGTTCGTCAATACATGGTCGCCCTGTCTGGTATGATGGAAAGAGAGAAGTTCATATTCACCCTTCTTCTGTTAACAGTAACTCAAAGGCTTTTCAGTACCCGTTTCTTGTCTTCCTTGAAAAGGTTGAAACCAGTAAGGTTTTTTTGCGAGATACTACCATCATCTCCCCCTACTCTATTTTACTTTTTGGTGGCTCCATAAATCTACATAACCAGACTGGAATAGTCACAATAGACGGTTGGCTCAAATTGGCGGCACCGGCACGAACTGCTGTCCTCTTCAAAGAACTCCGTTTAACTCTTCATTCTATTCTCAAGGAGCTAATTAGAAAGCCACAGACGGGAATG…
>F01_transcript_100931
ATGTTGCGAACTAAGCAACTAGGTAATCTCTCCCAATCTGCTAGGGCCTTTTTCCTCAGTGGATCACGATGTAATGCAGCTGATGGAAGTTCGTGCACATGTTCAGAAGATGACACGTGCATCTCAAGCAAGCAGAATACTAAAAATGCTGTTCGACTTCCACAAACACCATCAAGGTTAACATCAAAAACTTCAGCGAGAGGAGGTTATCTCACCTCGGGTGATGCAGTAAAGTCTCCAGCTTCTTCCCCACAAGTTAAATCTACTTCCAGCACTTTGGGAAGAACAGATTGTGTCAGTTACGTTAGTGGCATTGATGGAGTTCATAATGACATGACACATTCTTCATCTCCTGTAACCGATCAGTTTGTTAAGGCAGGTATTGCTGCAGTTAGTTTT…
>F01_transcript_100933
ATGGCTCCAGTCGCTCCCAGATCTGGAGATGCCATTTTTGCTAGTGTTGAGAGAGTGAATTCTGAGCTTTTCACTCTAACGTACGGTGCAATCGTCCGACAACTGCTTACGGATCTGGAGGAGGTTGAAGAAGTCAACAAACAACTTGATCAAATGGGTTATAATATCGGAATCCGACTAATTGACGAGTTTCTTGCTAAATCCAATGTCTCTACATGTGTTGACTTCAAGGAGACTGCTGAAGTAATTGCAAAGGTTGGTTTCAAAATGTTTTTAGGGGTTACAGCATCTGTGACCAATTGGGATGCCGAGGGAACAAGATGCAGCCTTATATTGGAGGATAATCCACTAGTAGACTTTGTTGAGCTTCCTGATACTTGTCAAGGTCTTTACTACTGC…
>F01_transcript_100936
ATGGAGAGTCCAATTGCGGACGCGGAGAAAGATGTCCAAATGAATGAAGATGCATTGCAATGCTTGAGCAAAAATATAAAATCAGCAGAAGACGATAGTTGGTCAGAAAGATTGGTAAGAAAGGTGAATCCAGAGCATGCATTGTTATTAGACAGTAGGATTCCGAAGCAAATTATCAGTTTTGATGAAAAATATCTTTGTCGTTGCCTGGAACTTATAGAATTCAGCGCGCTGAAAGTGGGCTCATGCACTATTCCATCAGATATGGGTGTTTTTCTTGATAATTCAAGTTCAAGGAAAATCAGCACTGGAAATATAAATGATTTGAATGGGATTGTTATTGAATGCCCTTCTGTAGCAGGGACTGAGAATGTTGTCATAAGCTCTTCTGGAGATTCA…
>F01_transcript_100937
ATGTACGAAGTTGCATTAAAAACTTTAATTGTTATACATCGTGCATTACGGGAGGTGGCTCCTACAATTCATGAAGAACTGATTAGTTATATCCAGAACAGAGATCTTGTGCTGAACATGTCTCATTTCAAGGACGAATCAACTCCCAATGCATGGGATTATTCTACTTGGGTTCGTACTTATGCTTTGTATCTTGAAGAGCGCCTGGAGTGTTTCCGAATACTGAAATATGATGTCATCACAGATAGCTCGAGAATTATGGAGCTTTGCATCCCAGACTTGCTTGAGCAGTTACCAACTTTACAACAGCTTTTATTTCGCCTTCTTGCTTGCCAGCCAGATGGAGTGACTAGAAATAATTCCTTGATTCAGTATACCCTCTCAATTATTGCTGCTGAA…
>F01_transcript_100939
ATGGAGGCGACAACATTTGCGGAAACGAGCGCGGTTCCCGAGGGAACGATGCTGCCGCCGGGGTTGAAGAACCCGATTGAGGAGACTGAAAAGAAGAAGATGAGGGTGTTGGTGGCCATCGACGAGAGCGATATGAGCTTATATGCTCTCAAATGGGTTCTCGATAATCTTTTCAGAAACAATGCCGCCGCCGCCGGTGCAACCTTTCCGGAGGAGCTCAACCAGCAGAATTCCGATACTATCACCGTCGTTCATGTCATGCAACCTTTCCAGCACTACGTCTTCCCTGCTGGCCCTGGGGTTTATGCAACAGACAATCTGGTGGATTCTATAAGGAAAGCCCAGTCAGAGAATGCTGCTGCACTACTTTCTAGTGCATTGAAAATGTGCAAAGATAAA…
>F01_transcript_100945
ATGATTCTTATTTTAGGCGGAATTATTCCGCGGTGGGCTGCAGCAGCTGCCGCGCGGCTGAGGATGAAGGGGGATCGGACGAGGAAGAGGAGGATTTGGGGGACGAGTGAGGAGAGCGGCGGAGCTGGAGGGACAGAAGGAGGGGCAAGTGGAGGGGATGAAGAAGCTGGCAAGGGTGATTGA
>F01_transcript_100946
ATGGTCTGTTCTTGGGGAGGATACACCTTTATTATCAACCTCATACCAATGCATGCACTTCTTTGTATTGTAACTGGTCGCTATTCTTCTCGGTTATACATAGCATATGCTCCACTTGTTGTTTTGGGAACACTGTTAGCCGCATTGGTTCCTGTTGTTGGTTTCAATGCAGTCCTAACATCAGAACACTTTGCATCATTTTTGGTTTTCATTATTATCCATGTGGTGGCTCTTGCGTATTACATCAAAGGAATTCTCTCTCCAAAAATGTTCAAAGTAGCAGTTACACTTGTTGTATCTGTTGGACTGGTTGTATGTTGTGCTGTGATAGCTGTACTTGTGGCATTGGTAGCTTCTAGTCCAACAAAGGGTTGGAGTGGACGAAGTTTAAGCTTACTT…
>F01_transcript_100948
ATGGTTATTAGCATAGAATTGGGAAATTTCAAATCTCAGCAATCACAGCAAAAAGGCACAGGGCAAGGAAGACTGCTTCTACGACCTGCCTTACAATATTGGGTATCAAATTTCCATGCTACGTTTACGGAAGACAAGGGACAAAATTATGAAGTGTACTCTCTCTATATATGTAGATATATACTTTGA
>F01_transcript_100952
ATGCTGAGCAGGGGAAAGGACGAGGAGGATACTGATATGCAAGATTTGGTTATGTCTTTCTCTGAACTTGAAGAGAAGGTCCTTGCACAATATACTTTTGCAAAGGCAAATTTTATTAGAGCTACAGCTGCAAACTATTTGTTGGATGCTGGAGTGCAATGGGGAAGTGCACTAGCAGTCAAAGGTGTGCGAGATGTGGCAGTGGAGTTATTGCACACTCTAGTAGCTGTGCATGCTGAGCCCCTGCTAGATAAGACACTCGGTATCCTCATTGAAGGTCTGATTGACACTTTGCTCAGTCTTTTCCATGAAAACAAAGAGAGAGATCTTAGATCATTGGATGCAAATGGTTTCTGTCAGCTCATGCTTGAGCGCCAACGCTCTCGCTCTAAACCTCCT…
>F01_transcript_100954
ATGAAGCTTTTTGATGCAAAGCAATTGATTGATACAATTCCAAAGACCAAGGATGAGTTGTTCTCATACGAGATAAACTGGGCTGTTTATGATAAGTTTCATTACCCACAGAATGACCTACATGAGAGGATGAGACCATGGATCTCTAAAAAGATTACCGAATTTTTGGGCGAGGAGGAGACCACACTTGTAGACTACATTGTGTCTACCACCCGGGAACATGTGGATGCCTCTGAAGTGCTGCACAGGCTCCAGACTATCTTGGATGATGAAGCTGAAATGTTTGTGCTGAAGATGTGGAGGATGCTTATATTTGAAATCAAGAAAGTAGAGACCGGACTTGCTTTGAGGTCCAAGGGTTGA
>F01_transcript_100956
ATGGGGTCAAATGTGTTCAAGGGGATATTACCCGCAAAAAGGATGTTGAGAGAGCTTTACGTGGGGCACACTGTTTTCCACCTTGCTTCATATGGCATGTCCGGGAAAGAAATGCTGCAATATGGCCGTGTGGATGAGGTGAATATAAATGGTACGTGCCACGTATTGGATGTCTGTCTTGAGCACGGAATCACGAGACTTGTATACGTCAGCACATACAATGTCGTGTTTGGGGGAAAGGAGATTGTGAATGGAAATGAAACCTTACCTTATTTCCCTATGGATGACCATGTTGATCCATATGGTCGTAGTAAGGCTATTGCTGAACAGTTAGTTCTGAAGAGTAATGGGCGCCTTTTCAAAGAAAAGAATGGGAAATGTCTGTATACCTGTTCAGTA…
>F01_transcript_100958
ATGGATATTTTTCATCTCACGAGGGAGATTGAAGCTTCTGATATGTCTTCGCTTGAAGCAGTGATAAATTGTGACGAGGAGAGGTTAAAATTGGAAAAAGATGCTGAAGCCTTGGCTGGTCAGGATGATGGTGGTGGAGAAGCTCTTGAGCGTATTTATGAGCGTTTGGATGCCATGGACGCATCAACTGCTGAGAAGCGTGCTGCTGAGATATTATACGGTCTTGGTTTTACCAAAAAGATGCAAGAGAAGAAAACCCGAGACTTCTCAGGTGGATGGAGAATGAGGATTGCTTTGGCGCGTGCTCTGTTCATGAACCCAACCATATTGTTGCTTGATGAACCCACAAATCATCTAGATTTAGAAGCTTGTGTCTGGCTGGAGGAAACCCTGAAGAAA…
>F01_transcript_10096
ATGGCGAAAAAGAGGGAGAAATCGGTGAATGTATCGGGAAAACCGAAGCATTCTCTCGACGCCAACAGAGATAATGGTGGAGGAACCAAAGGCGGCCGTAGCGCCTCCACTGTGCGGCGGCTCAAGATGTACAAAACCAGGCCAAAGCGAGACGCTAAAGGAACAATTCTCAAACATGATTTGCAATCCAAGGAGTTGCCTTCTACTCGAATTCAGCCTGATCGCCGCTGGTTCGGTAATACACGAGTTGTTAATCAGAAAGAGCTTGAATTCTTCCGGGATGAGCTCCAGACTCGCTTATCAAGTAACTATAATGTAATTTTGAAAGAGAGGAAGTTGCCCATGTCCCTTTTAAATGACCACCAGAAGCAAGCAAGAGTTCATCTTCTTGACACGGAG…
>F01_transcript_100960
ATGAAGAGACTCTCGGAAAACTTGGAATCAGTATTCGTTTCCTCGTCGCCGGACTTCGATTTCTACGCCGACGCTAAGATCGTGACCGCCGCCGGCCGCGAATTGCCAGTTCACCGGTGCATTTTATCGGCGAGAAGTCCGTTTTTCAAGAACGCGTTCTGCAGTAATAGAGAGAGAGGGGAGAAGTTGGAATTGAAGAAATTGGCGAAAGATTATGAAGTGAGCTTCGAGGCTTTGGTGATTGTACTGGCATACGTTTATAGTGGTAAACTGAGACCGTTTCCTATAGGTGTTTGTGTTTGTGTCGATGAGGATTGTACTCACGTCGCTTGTCGGCCGGCGGTGGGTTTTGTTATGGAGGTTTTATATGCTTCTTTCACTTTTCAGATCTCTGAATTA…
>F01_transcript_100962
ATGGCAGAACATCATCCCTCTGAAGGTTCAAGTATGAGTCATGCATCTGCAGAAAGTTGCAAATCAACTGTGGAGCTCAATATCAAGACACTAGATTCACATATGTACAGCTTTCATGTGGACAAGAATATTCCAGTTTCAGTGTTCAAGGAGAAAATAGCTAGTAAAATTGGAGTCCCAGTTGGGCAGCAACGGCTGATCTTCAGGGGCAAGGTCTTGAAGGACAATCACCTTCTTTCTGAATATCATTTGGACAATGGTCATACGCTGCACTTAGTAGTTAGGCAGCCTTCTCAATCACACCACTCATCTGGTAACAGCACTGGGGAGTCAACTGCAGAATCTGGTAATAGAGGGATGGATCCTAGTGCTGGTGGGACACGTACTCGTTTGGGGCAA…
>F01_transcript_100964
ATGAGTCTGATGGATGCAATGTCAAAATCCTTAGTATTTGGGCTTTTGATTTTATGGGGGCTTTTCTCCATTTCGGCTGCAAATGATGGGTTTCCTAGGTGTAACTGCGACGAGGAGGGATTTTGGAGTCTTGAAAGCATTTTGGAGTGCCAAAAAGTGAGTGATTTCTTGATTGCAGTGGCATATTTTTCCATCCCGATTGAACTTCTTTACTTTATTAGCTGTTCAACCTTCCCATTCAAATGGGTAATCATAGAATTTATCGCCTTCATTGTTCTATGCGGAATGACCCATTTGCTCAATGGTTGGACATATGGCCCACACCCATTTCAGCTTATGCTTGCCCTAACCATTTTCAAATTGCTCACTGCTCTAGTATCATTTGCAACTGCAATAACT…
>F01_transcript_100965
ATGTTGCGATCGTGTTACCGGCCACTGGAGAGGTGTTTTGGTAGAAGGAGTGGCGACGGCTTGTTGTGGCACACCGACTTGAAGCCTCACGCCTCCGGCGACTTCTCCATCGCGGTAGTTCAAGCTAATTCCTCTCTTGAAGACCAATCTCAAGTTTATACTTCTCCGTCCGCTACTTATGTTGGCGTCTATGACGGCCATGGTGGTCCAGAAGCTTCTCGCTTTGTTAACCAACATCTCTTCCGTTTTCTCCATCAATTTGCAACAGAGCAAAAGGGCCTATCAGCTGATGTATTAAAAAAGGCATTTAATGCAACAGAGGAGGAATTCCTTCATTTAGTAAAGCGTGAATTGCCGGTTCGGCCACAAATTGCATCAGTTGGATCATGCTGTCTTGTT…
>F01_transcript_100969
ATGATAATAGAAATCATTGTGATGTACCCAATTCAACATTGGAAGTATCGTCCTGGAATTGACAATTTGCTGGTACTTCTTATTGGAGGAATTCCCATAGCAATGCCAACAGTATTATCTGTTACGATGGCAATTGGTTCCCACCGTCTATCTCAGCAGGGAGCAATCACAAAAAGAATGACAGCCATAGAGGAAATGGCAGGCATGGACGTACTCTGCAGTGATAAAACTGGCACTCTGACGCTTAACAAGCTGACTGTTGATAAAAATCTAATTGAGATATTCGCTGAAGGAGTAGATGCAGATACTGTAGTTTTGATGGCTGCCAGAGCCTCTCGAGTGGAGAACCAAGATGCAATAGACTCTGCAATAGTGGGGATGCTGGCTGACCCGAAAGAG…
>F01_transcript_100972
ATGAGTGGAGGAGCGCCAGATTTCTTCTACAGAGAGGCTCAGCGCCTTGGTTATGTTGCCCGCTCTGCCTTCAAGCTACTTCAGATGCAGAAGCAGTACAAACTTATAACACCCGGTTCCTCTGTTCTTGACCTTGGTTGTGCTCCGGGTGCCTGGCTGCAGGTAGCTTGTCAAAGCTTGGGTCCATTAAAAAATGGTGGGGCTGTTCTGGGTATTGATCTTAAGAAGGTGAAGGTTCCTCCTCTTTGTGATTCAAGGGTCCAAACTATTGCTGCTGATGTCATGAAGCTCCCCAAAAACCAAATTAGGAGACTCTCTCCTCAGGAGAAAGGATTTTCCGTCATACTTTCAGATATGTGTCCCCTGGTTTCTGGAATCACGACTAGGGATGCAGCTTTA…
>F01_transcript_100973
ATGTCTCCCTTAGAGGTAGCAAGAGGTGCCGGTGAGGATGCTCGCGGCATTTGTCTACGAGAGTATGGCAGCGCTCCTGATGTTAATATCTATGGGGATCCTAATTTTACTTTCCCATATGTTCCAACACACTTGCATATGATGGTTTTTGAGTTGGTTAAGAACTCCTTGCGAGCTGTCCAAGAGCGGTTTATGGATGAAGACAAAATTGCACCTCCTATTCGAATAATAGTAGCCGATGGATCAGAGGATGTTACCATTAAGGTTTCTGATGAAGGGGGTGGAATAGCAAGAAGTGGTCTGCCTAAAATTTTTACCTATCTCTACAGCACTGCAAAAGACCCGCTGGGTGAGCAGCCGGAGCTTGAAACAGCTAATGTGGCCACAATGGCTGGTTAT…
>F01_transcript_100974
ATGGTATCAACAACAACAATCTCAATTCCAACAACAACAACAATCTCAATTCCAGCAACAACAACAACCTCCTCAGCATCCGCAATTCAAAATCAGCCCCCTATGTATTACCACCAGCAAGCACCGCCTCAGGCTGCCGCGCCTCCTCAGCAGCAGCAACAACAGCCCCAATACACAGCTGCCGCGGCCCAGCCAGCTAGCGCCGACGAGATCCGCACACTTTGGATCGGAGATCTTCAGTATTGGATGGATGAGAATTTTCTTCTGAGCTGTTTCGCTCAATCTGGGGAGGTTGTTTCTGCAAAAGTTATCCGTAACAAGTCAACCGGTCAATCAGACGGTTATGGCTTCATTGAGTTCGTTAATCATGCTGCTGCAGAAAGAAATTTACAGGCATAT…
>F01_transcript_100975
ATGCAAGCCATGATAGAACAGATAGTCATCAGGCGGGAAGACATGAAGAAAAATAAGAGGCCTTTCAATTTGGACTTGAACTCTGATGAGACAGAAATATGTACTGGGATCAACAGCATATCTGGAACATCAGTTGGGCAGATAGAGCAAGCTAGGCTGCAGAACGAATATATTGAAAAGAACCAGAAAACTGTAAATACATGTAACCTTAATCAAATGCTATCTGGATACATATCATTGACCAAACAGAGTGCCCATGCTGAATCGCCAGCTAAAGCAAAAGACCATACTTTAAATGTCATTGCTAAAAACATGAATATGAGAAATGCGATTGCAGGCCAAAATAGTGGGAGAAATGGATATAATCAGGTGCATCAGAATACTCATGGAGAAGAAATC…
>F01_transcript_100977
ATGGCATTGGAGAAAGAGTTAGATAGAAGATCAACTGAGTGGTCATTCAAGCTTGAGAAATACCAGGCAGAAGAGCATAGACTTCGTGAGCGGGTTAGGGAGCTTGCAGAGCAGAATGTTACCCTCCAAAGGGAAGTCTCTTCATTTCGTGAGAGGGATAGCGATTGTAGAAACCAGATTACCTCGTCAGAACAACAAATACAGGACCTGACTGCAAGAATGGAAGAAGCAAGAGATGAGAATCAAAATCTCCAGCAAAATATTTCTGAGATTCAAGAAAAGTATGGAGCAGCCGAAGAAGATCGTGATTGCATTCGGAGGAACTACAATGAAAAGGAGAAAGAATGCAAGGAATTGCACAGGTCTATTACTAGAATGCTAAGAACCTGCAATGAACAA…
>F01_transcript_10098
ATGCGGGATGGTGGCATAAGACTCCTTTTACACCTGGCAAGATCCTGGAAGGAGGGGCTTCAGTCAGAAGCCGCAAAGGCAATAGCAAACTTGTCTGTGAATTCAATTGTCGCAAAAGCTGTAGCAGAAAATGGAGGAATCAATATTCTAGTAAATTTGGCAAGATCTATGAACAGAGTTGTCGCTGAAGAGGCTGCAGGAGGCCTATGGAACCTTTCTGTTGGGGAAGAGCACAAGGATGGTATTTCTGAAGCTGGTGCTATAAAAGCGTTTGTTGATCTAATCTTTAAATGGTCTACTGGTGGTGATGGAGTTCTAGAGCGTGCAGCTGGTGCGCTGGCAAATTTGGCTGCTGATGACAAGTGTAGCATGGTGATTGCTGGGGTAGGTGGTGTACAT…
>F01_transcript_100984
ATGTTGAGGATTAAGAGGGTTCCCACTATCGTTTCCAATTACCAAAAGGGAGAGGGGGATGAAGGCGATTGTGGTCGGAATTGCCTCAACAAGTGTTGCCTACCAGGGGCAAAGCTACCTTTGTATGCTTTTAAGAGGGTGAACACGATTGCTAATGGAATTGGATTGCCGACTGAGGTGAACAAAGAGCCTCCTGTTGCCTTCTTGGATTCTCTCCTCCTTGGGGAGTGGGAGGATCGTACGCAGAAGGGGCTTTTCCGCTATGATGTTACTGCCTGTGAAACTAAGGTGATTCCAGGAGAGTGTGGTTTTATTGCTCAGCTGAATGAGGGCCGTCACCTTAAGAAGAGGCGAACTGAATTTAGAGTTGATAAGGTGTTGCAGCCCTTTGATGAGAGG…
>F01_transcript_100987
ATGGTAACCATTCGAGCCGACGAAATTAGTAATATTATCCGTGAACGTATTGAGCAATATAATAGAGAAGTAAAGATTGTAAATACCGGTACCGTACTGCAAGTAGGCGACGGCATTGCTCGTATTCATGGTCTTGATGAAGTAATGGCGGGTGAATTAGTAGAATTTGAAGAGGGTACGGTAGGGATTGCTCTGAATTTGGAATCAAATAATGTCGGTGTTGTATTAATGGGCGATGGTTTGCTGATACAAGAAGGAAGTTCTGTAAAAGCAACAGGAAGAATTGCTCAGATACCCGTGAGTGAGGCCTATTTGGGTCGTGTTGTAAATGCCCTGGCTAAACCTATTGATGGTAGAGGTGAAATTTCAGCTTCTGAATATCGGTTAATTGAATCTCCC…
>F01_transcript_100989
ATGAGCAATCTCAAACTAGGGGTGGAGGTTATCCGTGCCCACAACCTTATGCCCAAAGATGGTCGGGGTTCATCCAGCGCTTTTGTGGAGGTCCACTTTGACCATCAGAAATTCCTCACCACTGTCAAGGAGAAGGATCTTGATCCTGTTTGGAATGAGACTTTCTATTTTAACGTCTCTGATCCAAACAGCCTATCTAATATCACGCTTGATGCCTATGTCTACCACCATAACAACGCTACCAACTCCAAATCTTCTCTAGGCAAGGTTTGTATAACAGGGACATCATTTGTTCCCTATTCCGATGCTGTTAATTTGCATTACCCTCTAGAAAAGCGAAGCATTTTCTCCCGTGTAAGAGGTGAGCTTGGACTGAAAGTATTTATCACAGATGATCCT…
>F01_transcript_10099
ATGAAACTATTAAAAAATAAGATGAGATCTTTTGGAGATATATGCTTCTGGTGGTACGTTGATTGTCCGACCTCTGATTCAGGTGTTGCCTACTCAAAGCACATTGTGCACATATACTCCTTTGATGGCAGTGATGATTTACGGAACCACCTAAAGATTGATGCGCATGTTGGTAATGTTAGTGATCTTGCTTTCTCACTCCCAAACAAACAACTTTGGATTATAACTTGCGGAGATGACAAGGCTATCAAGGTCTGGGATGCTGTAACGGGATCTAAACAGTACACTTTCGAGGGTCACGGTGCCCCTGTCTATTCCGTATGCCCACATCAAAAGGAAAACATCCAGTTCATCTTTTCAACATCTGTTGATGGGAAGATTAAGGCTTGGTTATATGAC…
>F01_transcript_100991
ATGAACAACTCTCAGAGCCCCTCTTCTTCTTCGTCCGACGACTCGGCTTCTATCGCCACTACCCAACAGAATGTTGGGCGGAGTCTTAGAAGTGGTGATGGGAGTAACTCATTATCGTCAGGACTGGCTCAGGAGGTTACGCGTCGTTGGCGGGACGTGTTCTGGTCAGCGATCTTTGTATCACATATGATTTTATTAGGGCTTGGTCTTGGGGTGCTTGGGCTAAATAGGTTTAGGAAGAAGGACAGGTTTAATATAGATAGATACACATCCGGAATACTTGAGAATCAAGCAGGTTTAACGGAGGACTACTGGCCATTGTATGCCGTTGCTGGTGGAGTTTCGACAATCCTTGGATGGGCATGGTTGTTGTTGCTTGGTTCACGTGCAAATCAGATG…
>F01_transcript_100993
ATGAACAAGAGGTCGTTCAAGTATGCTTGGGTGCTTGACAAGCTCAAGGCTGAGCGTGAACGTGGTATTACCATTGATATTGCCTTGTGGAAGTTTGAAACCACCAGGTACTACTGCACAGTCATTGATGCCCCTGGACATCGTGACTTTATCAAGAACATGATTACTGGTACCTCACAGGCTGACTGTGCTGTCCTCATCATTGACTCCACCACTGGTGGTTTTGAAGCTGGTATCTCTAAAGATGGTCAGACCCGTGAGCATGCTTTACTTGCTTTCACCCTTGGTGTCAAACAAATGATTTGCTGTTGTAACAAGATGGATGCCACCACCCCAAAATACTCTAAAGCAAGGTACGAAGAAATTGTGAAGGAAGTTTCTTCATACTTGAAGAAGGTT…
>F01_transcript_100996
ATGAAGGCTCAAATTGATAAGATCAGTGTGGAGATTTCTGGGTATAGTCATCTTGTCAGTGCTAGGAGTTCAATTGATCTGGAGGAATATTATTTATCGCTCAGAAAGCTTACGGAATACCAGACACATCTTGGAGCTCTTCAAAAGGAAAAGGAAGACTGCTTCTACGACCTGCCTTACAATATTTGGTATCAAATTTCCGTGCTACGTTTACGGAAGACAAGGGATGAAATTATGAAGTGCACTCTCTCTATATATATAGATATATGCTTTGATTGA
>F01_transcript_101
ATGCTAGAGTTGTTACTGAACCTTTTTTTTTTCCTTCCAAATGCAGGTGCTTTAGGATCTTTTTCAGCTGCTACATATATATTACATCAAAAGAGCACAATGCCAGGTATAGAAATTAATCATTCCGAGACTCTGCACATTGATCCCAAAAGTGTCCGAGAAATACCCCAAGTAAATGATTGCAATGACGCAGTTGAGTCAAATGCTCAGCAATCCCATGAAGAATGCATGCTTACAGAAAAAACTACCGGCGAACAACTGTTGGATAAAGGATGCCTGCTATTCGGTTGTGCTCATTATCGACGAAGGTGCCGTATCAGAGCCCCTTGTTGCAATGACATTTTTGACTGTCGTCACTGCCATAATGAGGCGAAGAACAATCTTGATGTTGATAAAAAT…
>F01_transcript_101001
ATGAAAGTTGCAATGACACGACGTTTTGTACCTTTGGATTATAAGCAGCGAGCATATTTGCAGTTAATTGACCTAGTACAAGGAAGTAAATCTGTAGCCGAGTATACTTCAATGTTCTATAGTTTGGTTGCACGGTCTGAATTTTCTTAG
>F01_transcript_101002
ATGCAGGTTTTACAAGGTGAAAATGGCAAGGAGATCTTTGCTCGATTAAAACGAGACCTTGTTCCTACAATGATTAGTGGTGTTATGTACTGGCCCTTGTGTGATTTTATTACATTCAAATTCATCCCTGTTCAATTGCAGCCACTGGTGAGCAATTCATTTTCTTATCTTTGGACTGTTTACATTACTTACATGGCAAGCTTAGAGAAAGCAGATGTCATATGA
>F01_transcript_101004
ATGAAAAGTAATGCAAGGAAACTGGCAGAGCAAGATGAATCTGTGGTAACGAGTTCAGGAATTCCTTACACCATTATCAGATGTGGGTCGCTAAGGAATTCTCCTGGTGGGCAGCAAGGCTTCAGCTTTAAAGAGGGTAGTGCAGCAGAGGGAAGTCTGAGCAAGGAGGACGCTGCCTTCATATGTGTGGAAGCTCTTGATAGTGTCCCAGAAAAAGGACTGATATTTGAGGTGGTCAATGGTGAGGAGAAGGTTTTGGAGTGGAATGAATGCTTCACAAGATTGATGGAGAAAGTAGAGCAGCAGCTTCTATAG
>F01_transcript_101005
ATGCGTGTTTGGATTAATCGGGTGTTGTTGACTGCACGTGATATTGCTATTCATGGAGACTTGAAAGTTCTTATTCTGGTTGTATCTGGCTTGTGGATGATTTCTTACATTGGAAGTTTCTTTAACTTCCTTACTCTAGTCTACATCGGGATTCTTCTTAGTCTATCAGTACCATTGCTATATGAGAAGTACCAGGATCAAATTGATGATAAGTACCGGAAACTTGATGAAAGTGTCTTAAGGAAGATTCCATTTCCTAAAAACAAGGAAAAGAAGACTCAGTAG
>F01_transcript_101008
ATGCTCATCCATCAGGGTAAAGTTCTGAAGGACGCAACAACACTAGAGGAAAACAAAGTTGCTGAAAATAGTTTTATTGTCATTATGCTCTTTAAGGTAAATTTGATTATATCCTCCAACCTAATCTTTTCTCTCTATGGCTTTACTCATGAAAGAAAAGCAGCCATGCTCAAAGTATGGTATGGTATTTGA
>F01_transcript_101012
ATGGAAGAACAAAGTTTATTTACAAGTTCGGTCTCTAAACGGAGTGCTGAACAAAGTACATCTACAAGTACAGGTAACAAACGTTCTAAGAAATGCACCTCTTCAGTTAGGGATCAATTTGAAAAAGTTATCATTGATGAAAAATTAAAAGCCAGGTGTAAAGATTGTGGTCATATTTATGCATGTGAACACGGTACTAGTAATATGCTTCGACATGTTAGCTTAAAACATGGAAAAGAATTAGTTGACAATGAGTTAGAAAGGGTGCCTTTAGATCAAAATCACTGTTGTGAGCTAATGGCAAAGGCTATAATCAAACACAATTATCCCTTCTCTTTTGTGGAACATGAAGGAATTCGTGAAGTGCATCGTTACTTGAATCCAGATGTACAATTTATC…
>F01_transcript_101013
ATGGTTAACCACTTTGTCCAGGAATTTAAGAGGAAGAACAAGAAAGATATTAGTGGCAACCCAAGGGCTCTTAGGAGATTGAGGACTTCTTGTGAGAGAGCGAAGAGGACTCTTTCATCCACTGCTCAGACCACAATTGAGATCGACTCTCTGTATGAGGGTATTGATTTTTACTCCACCATTACCCGTGCCAGATTTGAGGAGCTTAACATGGACCTCTTCAGGAAGTGTATGGAGCCTGTTGAGAAGTGTTTGAGGGATGCTAAGATGGACAAGAGCACTGTCCATGATGTTGTTCTTGTTGGTGGTTCTACTAGGATCCCAAGGTTCAGCAGCTATTGCAGGATTTCTTTAATGGGAAGGAGCTCTGCAAGAGCATCAACCCTGATGAAGCTGTGG…
>F01_transcript_10102
ATGGGTTTTAGGCTCAATTTGAAATGGGTTTTCTCTGTTCAATCCCCTTCCTTGACCAACTCAGCAACCTGGCCCTCTTCTTATTCATTTAGAGGCATGGAGGGTTCCTATGACTCAGCACGGATATCTTTTTCGTCTATTATTTCTGGAGAGAGTGAGGCTTTGTACAATGATCCTCTGAGGGCACATATTTGTTCATCTGCTGCGCAGACCTTATCTAATGATTACACAGAAACAGAACAAATAAAGGTAAATGTTCGCAAGAGGTCCTGTGGTGGCATATATAACCTCATCAATGACAATATCCAGATGTCCGCCAGAGAAGATCAATCGACTTTCCTAACAAGCTTACAGGCTAGCAAAACATCACATTTCAGGGTATTGATGAATAATCTTAAT…
>F01_transcript_101022
ATGATAAGTTCATCAAGAGGGACTAGCCATCTATTTACCATTTCACCATCAGGGGGGAAAGTTAATATTCCTTATTCTGATTCTTGTTTTACTACTAAAAATAGTGGATATGATGTTGTAACCAAGCCTTCAGTTTATGGTCCGCCAAATTCTGGTTTGCAGATGCTCAATCAACAGAAGCTATATGAATCTGGTCCTCCAGTTGCACTCTCTGCTGTTAGCAGGATAAGGAGTGAAAATAATGGTTGGAGAAGCACTGTGACTGGGGCAGCAGCATCTGCAACGGGCAAGATGGGCTCATTCTGTGGGGCAATTACTTCTGCTTTCCACAACTGCAAGAACAACGATTTGTATGGGGATAGCAGCTATTTGAAGGCAAAGTACCACCTGCTGGTCTTT…
>F01_transcript_101023
ATGGATTGGCATGTAACCAAGAATCGGATATCAAAAAACCATAAACAGAAGCCTTCTCGTAAATGGTTTGTTAGTGTCAACATGTGGCTCAGTGGTGCGGAGGCATTGGGAGTTGATGCTGTTCCTGGGTTTTTACCCACTGAGAATGTTACTGAGAAGAAGGGTGATGAAGAAATGGCTGTTCCTGCAGACGAGGATCAGAATGTTTGTGCACTCTGTGGAGAACCTTTTGATGATTTTTACAGCAATGAGACTGAAGAATGGATGTACAAGGGTGCTGTTTATATGAATGCACCAACCGGATCAACAGCAAGCATGGATAGGTCTCAGTTAGGTCCTATTGTGCATGCTAAATGCAGGTCCGAGTCGAATGTGGTTTCTTCTGAAGATTTTAGCAAA…
>F01_transcript_101024
ATGGCTGACGCCGCTCCCCCCCCGACCGAGCAGGTCGCCAACCTGCACCTCGACGAAGTGACTGGCGAGCGTATCTCCAAGACGGAGCTGAAGAAGCGCCAGAAGGCCCGCCAGAAGGAGGAGGAGAAGAAGAAGAAGGCCGCCGACCGACCTGCTTCTGCGGCTCCCAAGAAGCCCGTTGGTGGCGAGGCTTCTGAGAAGGACCTCACCCCGAACCAGTACTTCGAGATCCGATCGCGGACCATCAACAAGCTCCGCACGACCAAGAGCCCGAACCCCTATCCTCACAAGTTCAATGTCACCTACGACCTGCGCAAGTTCGTCGAGGAGTACAGCTATCTCAAGTCCGGCGAGCATGCCAAGGACAAGATCATCCAGATCGGTGCCCGAATCCACGGC…
>F01_transcript_101025
ATGACTTTCAAGCGTAGGAACGGCGGCCGCAACAAGCACGGCCGCGGCCATGTCAAATTCATTCGTTGCTCAAATTGCGGAAAATGCTGCCCTAAGGACAAATCAATCAAGAGGTTTCTTGTGAGGAACATAGTTGAGCAAGCTGCTGTTAGGGATGTGCAAGAGGCTTGTGCTTTTGAATCCTATACACTTCCCAAGTTGTATGTGAAGATGCAGTACTGTGTTTCATGCGCAATTCACTCCAAAGTGGTCAGGGTCCGCTCCCGTACTGATAGGAGAAACCGTGAGCCTCCAAAGCGCTTTTCTCGCCCAAGGGATGATGCCAAACCAGGTCAACAACCAGCACGGGCTCCTGGTGCACCGGTTCCGGCTCGTACTTGA
>F01_transcript_101026
ATGGACTACGAAGATCAGTACCAGCAGTTCTCAAAGCCAAAATATGAATGCCTTCTCTTCGATGTTGATGATACCCTTTATCCACTGAGTTCTGGACTGTCCCCTGAATGCACCAAGAACATTACAGACTATATGATCGAAAAACTTGGAATAGAGGGGAATAAAGTTCCTGAAATGTGTGTTCAACTATACAAGGACTACGGGACAACAATGGCTGGTCTCCGGGCCATCGGTTATGATTTTGACTATGATGACTACCATAGTTTTGTACATGGTAGATTACCCTATGAGAATCTGAAATCTGACCCTGTTCTAAGAAATCTTTTACATAGCCTGCCCATTCGTAAAGTTATTTTCTCAAATGCGAATGAAGCCCATGTTGCTAAAATTCTTAACAAA…
>F01_transcript_101029
ATGTTCAGAAAGCTAGATCATAAGAAACGGCCTGCTAATTGGAAAGTTGGCATTGCTGCTCCATCTGTGACTGTAGTTTCTGGGGATAGCAAAGATAGGGATGAGAAAATATTTGACAAAGATGAGGAGGAGATAAATAGGTTTACAAAGCTAGAAACGAGGCGGGCGCTCTTCGGTGAGGACTCCGATGAAAAGATGAACAAGTTCGATGGGGCTAGAGCTGGCTCACGTGTGCTTCTATACCATGATGAGGTGTCAGGATCTACAGCAGTAGCTAGTAACGGTGCTGAGGATCTTTATAGGAACCAGAAAGACTTTGAGGATCTATCTTTGATCCGCAAACAGCTTCTTCAGATTGAAAACCAGCAGTCCAGTTTGTTAGATCTACTCCAGGGATTC…
>F01_transcript_10103
ATGGCGGCGGCTACCTCTTTCTCTCCCTCCATTTCACCTTCATCATCATCATCGGCCAAATCACTAAAACCAGCTGGTAAAACCCTAGCTTTTAATCTAGGTTTTCTCTCTTATAATGCTTCTAGAACAGCTTTAAGCGCTCTCAAAGCTCGAGCTTTACCCAGCAATGGTTTTGGTTCTGGTTCAGGATCAGCTCTTGGGTCTCGCATGGTGTCTGCACCAGCGATTAAGCCTCCGACTATTCTCGATTTTGAGACGTCGGTGTTTATGAAAGAGAAAATTTCTCTGGCGGGTCATGATGAGTATATTGTGAGGGGAGGAAGAGATTTGTTCCATTTGCTGCCTGATGCATTCAAGGGTATTAAGCAGATCGGTGTTATTGGTTGGGGCTCTCAGGGC…
>F01_transcript_101030
ATGCTTGAGGCTCTTACCCAGCAGGACAACTCTGAACTACTTCAAGCAGAGCTTAAGAGGACACGAATTAACACAACATGCTTTATAGAGTCATTTCCATTAGACATGGTCCCAGAATCTGCCAAAGCTTCTATTAGAGGATTAATGGATTCTCCCAGCAGAAATGGAAAACCAAAATTATGA
>F01_transcript_101031
ATGAACTTAACAAATGACAACTTTGTTGGCTGTCAACAAATTGCTGCCTGTGGAGGACTAGAAATATTGTCGTCGTTGATAGCTGGACATTTCCCATCAGTTAGCTCATATTTGCCTCCTTTCATTGAGATACAAAAACATGGTTCGCCATCCAAGTCGGGTCTCGAATTTGATCAGCAGAGTGGCAAACATCTCACTGATGAAGAATTGGATTTTCTTGTTGCTATTTTGGGCTTGCTTGTAAACTTGGTTGAGAAGGATGGTCAGAAGAGTGGGATAAGGCATGTGGATTAA
>F01_transcript_101033
ATGACCGATCCTTATGGCGGTGCAAGTGCAAGCTTAAGCGTAAGCTTGAGCTCAAGTTCCAATAGTAGTTCGAATGATACGGACGATGACCAAACAATCGCTAGAATATCTTCAAAAGAAGAGGAAAATCGTAAAAATCATGGCACGCTTGGGAAGATGCTCTCGCATTTGGATTCTATCCCGCACACTCCTCGGGTCAATGGGAAAATGCCGGACGTAAATGATGCAACTCTAGATCATGAGCGACTCTCTGAAAGGTTGGTAACATATGATTTAGCTGAACTGCAAATCGAGGGAGATGGAAACTGCCAGTTTCGAGCTCTTGCAGATCAGTTGTTTCATAATCCGGAGTATCACAAACACACAAGGAAGGAAGTTGTCAAACAGGTGTAG
>F01_transcript_101034
ATGAGCAACTGCATCAACAGCTGCATAAACAAGATATTTGTTCTTACTCAGTTCAACTCTGCTTCTTTGAATCGTCACATTGCTCGTACATATTTTGGAAATGGTGTGAACTTCGGGGACGGTTTTGTCGAGGTGTTGGCCGCCACTCAGACACCAGGGGAGGCAGGCATGAATTGGTTTCAAGGAACTGCAGATGCAGTGAGGAAATTTACATGGGTACTTGAGGATGCCAGGAACAAGGACATTGAGAATATACTGATTCTATCGGGTGATCAACTTTACCGGATGGACTATATGGATTTTGTGCAGAATCACATTGACAGAAATGCTGATATTACAGTTTCTTGCGTACCCGTGGGGGACAGTCGTGCATCCGAGTATGGATTGATGAAGATTGAC…
>F01_transcript_101036
ATGCAATTATCTAACAATTATGGTCTACTATTATTTGTTTGTATTGTGATTTTGTCCCTCTTATCCTCATATTTTATTTCCTTTCAAGATACCTGCAATACAAAGAGCAACCAACAAAATCTGGGAACCATCAAGTCTTCTAACTTGTGTACTGAGATTATTGAGTATACAAGACCAACAGAAACTGCTGTATGTAATCTGGCATCAATTGCTCTACCACGATATGTTAGAGAGAAGGGGGGTCCCAGTGGAATCGCAACCATCTAA
>F01_transcript_101038
ATGGAGAAAGTGGAGGTAGTAGAAGGTGCTCTATCTGAGCTAACCCATGAACTTCAGCTTGGAGTTACGGAAGAAGTTAGAAACCAAATCTTAGCCTTGGAAATAGATCTGGCAAATAGAAATGAGAAGATCACTTCTGCAATTGCTTGTGTAGAGAAATATGCTGAAGCACGAAGAGAAATGGAAAAAAAGCTTGATTTGTAG
>F01_transcript_101039
ATGTACAACACAGATGAGTCCATTCATGCTTTTGCTGATGCTTCAATGAACACAGCTTACCAGAAAAAGTGGCCACTTTATCTTAGCACAAAAAATACTATTCTCAAGAAATATGATGGAAGATTTAAGGACATATTTCAAGAAGTTTATGAAGTAAGCTGGAAATTAAAGTTTGAAGCTGCTGGGATATGA
>F01_transcript_10104
ATGGGTGAGCCACCAATCGCCACCGGCAGCGGCGGCAAGGCGTTGTGTTTGGCTGTTCACGTAGTTCGAGGCAGGTGGTTCTCCCTTTTTGCATCCTTTGTAATCATGGCTGGGGCAGGTGCTACATATCTTTTTGGAGTATATTCCAAGGAGATAAAAGCAACTCAAGGATATGACCAAACCACCCTGAATCTGCTAGGCTTTTTCAAGGATTTTGGAGCAAATGTTGGGGTACCCTCAGGCCTTCTTGCTGAGATTACCCCAACATGGTTTGTGTTAGTAGTTGGCTCAGCCCTTAATTTTGTTGGCTACTTCATGATATGGTTAAGTGTCACAGGCAGAGTTTCCAAGCCAAAAGTGTGGCAAATGTGCATGTACATTTGCATTGGAGCCAATTCC…
>F01_transcript_101041
ATGTTGTATAATGAAGAACCAGAGGAGATGCTGAAGATTATATGTAGCGTAAGGAAGCATATTTTGACTGGAGGCCCTAAGCGTCTACCATATACAGTTCCTCCTCTTGTTTTTTCTGCTTTGAAGTTGATCAGGAGATTGCAAGGTCAGGATGGAGATGTAGCTGGTGAAGAGTTTCCTGCTACACCAAAAAATATATTTCAGCTCTTAAATCAGACTATTGAGGCTCTTTCATCTGTTCCATCACCCGAGCTGGCATTGAGGTTGTACTTGCAATGTGCTGAGGCTGCTAATGATTGTGATATTGAGCCAGTTGCATATGAACTTTTCACTCAAGCATTTGTATTATACGAGGAAGAAATTGCGGACTCCAAAGCCCAGGTGACTGCAATACACCTA…
>F01_transcript_101042
ATGGATGTACAGGGTAGTGGTCCTCATGGTGAATATGGGAGATTTGAACAAATCCTTTCTCAGTTTCTTCTGAAAAGCTTGCACATGATATTGGACTCGAGGGTTCCTTCTATTCATCCTTATGATTGCAAAAGTGACTCATTGTCAGCTAATCAAGTCAAAAAGAGTGACAAATGGTTCAGTTTAGTATTGGGGGACCGTCCTGCTGCTTTGGATAATTTGAGTTTCTGGCACAGAAATTTAATGGACCCAATGATAATTGACATTATACTTGTTTCAGAAATGTCGAATTCTTTATCTGGTCAGGGATTGGGAACACCAGACGAAACTGTTATAGAGAGGTGGGTAGTTCAATATGAGTATGGAAGAACAATGGCTCCTCAGGTCGGAGATTCTTCT…
>F01_transcript_101043
ATGATAGCAGAAGGTTTGGACACACAGAAAAACATGGCCCATGATATGAATGAGGAATTGGACATGCAAGTTCCTTTGATGGATGAGATTGACACTAAGGTGGACAAGGCGACATCTGACCTTGAAAATACCAATGTTAGACTCAAAGACACTGTTAACCAGGTATTGCGGCCTATCTTTACAAGGTGCTTATTTTGA
>F01_transcript_101045
ATGGAGAGTTACGATGGGTCCGGAGATCCTTATGACCATAGTCAGGCGTTCGACCGGCTGATGGACTATTATGACTTCACTGATGCTGCCAAGTGCCACACTTTTGTCACAACGCTGAGAAAAGATGCGAGACAGTGGATGGGGACTTTACCATCAGATTCGATATCCTCTTGGACCGAGCTTTGTGATAAGTTCCATGCACGTTTTGGGAGCAACCGAAGAAGGGGAAAGCCTACGGGTTCTTTAGCACAGATCCGGCAGTTCACCAGCGAATCTTTAGGCCAGTATGTAAAGAGGTTCAGAGAAGCGGTTGGTCAGGTGTCCGACCTTAATGATCTCCAAGCTGTAGGTTTGTTCCAGAACGGGCTAGATCTGGTGAAGTCCAAGAAGTTGGTGAAG…
>F01_transcript_101048
ATGGCCATTTCCTTGCTGGGATTACATCGTAAAAATCAACTCAATAAAATTCCACTGTTAATGGAGAGGGCAGAAAACCATAACGACTGTGACCATGTTATTGACATAACAAGTAGCAGTGACGCTTCCTCATCTAGCTCCTCCCAAGATAGAGCATACAATGGCTCAGATCCGCGTCGGATTGAAGACCAGCCTTCTACAAGTGTGAGGGTCCCCGTTTTTCAACCTTCATTTTCAACTGCCAGTGGATCGAACTCGAGGAATTCATCATTTATAAGGAGAGGGAATGGCCATGGCCGCCGAAGGAGTCCATTGAATTCTGGTTTATGGATATCTGTTGAATTAGTTATAACAGTGAGCCAAATTATTGCATCCATTGTTGTTCTGTCTTTGTCAAGA…
>F01_transcript_101050
ATGTATCCACCCTGTCCTGGTGGAATCTCTGCAGCTCCAAATTTGCAAGTAAACCTGCAGTTGCCACAGACCCTTGGCTTGCTAGATTATGACAAGAGGCTGACACATTCCTTCACGGCTCATCCAAAGATTAATCCCTTCACTGGTAAAAGCTACTAG
>F01_transcript_101051
ATGGATACTTATGATTTTGTTAACAACTGGGAAGGGCATTCTCATACCATTACAAATGTCCAATTCAAGCCAAATTCATCTATCTTCGCAACATCTTCTTTTGATAGGACTGTTCAAATATGGGATGGAAAAAGAGAAGACTGCTTCTACGACCTGTCTTACAATACTGGGTATCAAATTTCTGTGCTACGTTTACGGAAGACAAGGGACGAAATTATTAAGTGTACTCTCTCTATTTATGTAGATATATACTTTGATTGA
>F01_transcript_101054
ATGAGTCCCCAAAGTGCTTTGAACACGAGTAGAGCTCTAGAGGGTGTGCATGGAGTTCATCTGGTGCCTCGTTCACCATTTGCATTTGAAGAGATAAATCAGCATGGGGACTTCCATCAGTCAAGACGTCAAAGTTCAGCTGTTGGAGCCAGTCAGTTATTGATAGTGCAGAGAGTATGGCAGCAAAGGCCTTCATGTCTGAGGCCCATCAGGTGTTGTCTGCATGGTGATAGGAATCTTGCAGAAACAATTGCTAATGTGCTTACATCACTTCCTTTTGTTGCTCTTGGAATCCAGACCCCAAGAAAGAATTTGAACTGTAAGCTCTATGCTCATTCATTAATTGGAGTAGGAGTCGCCTCAAGTTTGTATCATGCTTCAAGAGGCAGATTGAGGAAA…
>F01_transcript_101057
ATGAGTAATTTAAGAGCAATTTGTAGACCTCACGCAGTGATTGCTTGTTGTTGCAAAGCTCGAGCTCGATCGATTTCTAGGGTTTCAATCCCTAACTTAAAACCTCGATTATCTTCACCGTCCGTGTTCTCTGCTAGTTTTGATTCTTCAGAGATACCTAAAATCGAGCCGTGGGTTCGGTTGAATCATCAGAGGAGGACTTTGGTTAGGGCGGCAAATTGGACTGACGGCAACACTCCCTACGAAACTCTCGAGTTGGAAGGTGATGCTGATGAAGAGAAAATAAAGTTAGCCTACCGCCGTTTAGCCAAGTTTTATCATCCTGATGGTTTGTTCTTTACCCTTCATTTGTCATATTTTACTTATGATGTATAA
>F01_transcript_101059
ATGGCGGTGGAGTATTCATGTTGCGAGACAGAGTTCTTCATTCACATACTCATAATTGTGTTTTTGGTGTTGTTTGCTGGTTTAATGTCTGGACTTACTTTAGGCCTCATGTCTCTGAGTCTAGTTGATCTTGAAGTTCTTGCAAAATCCGGAACTCCTACAGATAGAAAACACGCAGCGAAGATACTGCCAGTTGTCAGAAATCAGCATTTATTGCTTTGCACACTGCTTATTTGCAATGCTGCTGCTATGGAGACGCTTCCCATTTTTTTGGATAGCCTGGTTACAGCTTGGGGTGCTATCTTGATTTCAGTAACGTTGATTCTTCTTTTTGGTGAGATTATACCACAATCTGTTTGTTCGAGATATGGATTGACAATTGGAGCAACCGTGGCACCA…
>F01_transcript_101060
ATGGAAAAGAAGATTGAGACTTTAGCAAGGATCACTGCTATTTTGAAAGATGTTATTCAGAACAAGGATCGTATTATAGCTCGTCTTCAACAGCCATATTCGTTAGACTGCATTCCTGTGGAAGCAGAATATCAGGTTCCAAATAGAAGTATATATTTTATGTTATTATATGGTTTAATTTTATTTATGTTGAGAGGAATTATTGTTAGTTGCGGGAATCTACATGACCTACTGTTGGCTTACTTTAGCAAAGGGATTTTCCATAAAAGTGAAACCCCCCCAGTGAAGCTAATTTGGTCATTCTCAAAAATAAGAACTATAAACAATTCATTTTCCTTTGTTTACGTAGTTTATCTTAATGGAAATGATAACGTCACATCAATTTTTGATAATGTCAGC…
>F01_transcript_101061
ATGGTGAAGTTAATGGTGGAAAGTTTTCTTCTTGGATTTTTGATTCAAGTCATTGCTGTATATTCTGCTGATGTAAAGCAATTGAACATATGGCCGATGCCAAAATCGGTGGTCTATGGATATAACAGTCTTTATCTCAGCAAGGACTTTGAGCTAAAGACTGGAGGTACTAAATATCCTGATGCCTCTGGGATTCTAAAGGATGGATTCTCGAGGTTACTTGCTGTCGTCAAAACAGCCCATGTTATTGATTCTAACTTTTCCCATTTTGATCCCTCGACAATTTTACATGGAATTCACGTGTTTGTCATTTCGCCAAGTGATGAGTTACAATATAGTATTGATGAGTCGTACAACTTATCCATCCCTGCACATGGAAAGCCGGCTTATGCACATATT…
>F01_transcript_101063
ATGGCGACGAGCATCGGTTCCGTTTCCATATCCGGTGGAGTTCCTCTCAAGCCAGGTGCTTTTTGTTCCACAAAGTCCAGTTTATATGGTAATACCTTGCCGCTGAAAATTCAAAGAAAATCTAATCAACAAAGAACCAAGCGCAACTTGTCTGTTTGTGCAGAGTACAAGTACGTAAATTTTGTCTCCTGGATATGCGTAATTAATATGGAATTTGAATAA
>F01_transcript_101067
ATGGAGAAATTGAAGGAACAAAAAGAAACACAATCCGAAAAGGGCAAAGCAACAGTATGGGACTGTGGTAGTTCACTCTACGACTCATTCGAGCTCAAATCATTTGAACGCCAACTTCACTCCGCCATTTCTTCTTCAAGAAGCTTATCAATGCCTCATTTAACAGATAATCATCGCCGCCAAACTCCTCCTCCTCTGCCGCGGCCGCCCCAAGCTCAGCCATTAGCCTTGTCCAAAAAGTCTTCAAATATTTCTCGCTCACTTCACAAATTCATCCGGTCAATATTTAGGCCTAAACAAAAGAGTCACAGCTTTCAACTTCCACAAAATGGGGCGATTCCAGAGGTACCGGAGAATATGGATGGAGATTATTATGATCATGCCGGTCTTTCGCCAGAA…
>F01_transcript_101069
ATGAGTGACGAAGCTCAAGAAAGAGAAATAGCCAGTATACATAAAAATCTCAAATGGATCCTCCATAGTATCCAAAAACTCAACCCAAGAGGCGAAATCCACGCACGATGCTTGACCAACCGTGTAAGTCAATGTCATGTTGTGACCAAAATAGAACCTGTGCCGACGAAAATGACCAATCAGCCTCAGATGGGTCATAAACCAAATATATAA
>F01_transcript_101074
ATGTTCCTTGCCAACGCTATTCCTAATAGAGGTGATGCTGATCCTGATCTAGGATCTGTGATTCTCATGAGTATTGAGGTGCTGACCAGAGTATTTGGAAAGCATGCTCTATACCAAATGGATACCTGCTATGTGTCACAGTCGCTGCGTATACCTGCACGACTTTTTCAGAATATTCTCCACCTTAGAATTTCTGAAGCTCCTACTAGATCTAATTCTTTAAGGATCTTTGATATTGAAGGCACTACTGAGATCGTAGAAAGCATGGACACTTGTATTGTAGATCGACAGTTTACGATTGAACTTTATGCTGCATGTTGCAGACTCCTGTGTACTGTTCTTAAGCATCACAAGAGGGGCTACCACAACTTCTGTTATGCAGAGTAG
>F01_transcript_101075
ATGGTTGACCCTAAAGTGTCAAATAGATCATCACGTTTTGCACAAGAGCTCATCTCAACCATTTTATTCACTGTTGCTGTTGGTCTAATCTGGGTGCTGGGTGCTGCTGCACTTCAGAAGTATATTGGTGGCCTAGGTGGAATGGGAACTTCAGGTGTTGGGTCAAGTTCTTCGTATGCTCCGAAGGAGCTGAACAAAGAAATAATGCCTGAGAAAAATGTCAAAACATTTAAGGATGTCAAAGGTTGTGATGATGCTAAACAGGAGCTTGAGGAGGTGGTGGAATACCTAAAAAATCCGACAAAGTTTACTCGACTTGGCGGGAAGTTGCCGAAGGGAATTCTTTTGACCGGAGCTCCTGGAACAGGAAAAACTCTGCTGGCCAAGGCTATTGCTGGA…
>F01_transcript_101081
ATGGTATTGGCACTATTGCATGAATCAGATCTGATACTTTCAGATGATGATGTTGAAATGATTGTGGATAAGGTGGCAGTTTACTCTACTTGGTCACCTACTCTTTTATGCTCCCTTATTCTAAATACTGATGATACCTTTGTGTCCTTAAAACAGACATTCAACGATGCAGATACAGAAGGTGATGGAAAAATTGATCAAGAAGAGTGGAAGGAATTCGTATCAAAGAATCCTTCTATGATTAAGAACATGAGCCTTCCATATTTGAAGTGA
>F01_transcript_101088
ATGTCGTGCCAATCTTACGCTCCTCTTCGGATGACCCCACCCGGTCTACACTGTTTTACTCAGGCCGCCATGCCAAACAGCAATCAAATCATCGTCGCCACTCGGCGGCGTGATAAAAATTATCGTCACATTGAGATTTTCGATGTTGATTTGCATAAATTTTATCCGGTCACTGAGTTGGTAAATCCTAATTTCCATCACTACAATCCATTTATCTCGCCGGATTCTGGTTTTCTGGGTTATCACCGGTTCCGAGGAGAGTCTTCCGCCGTAGAGTCGATAATGCCATACCTGGATCACTTATCGTCTCTCATTGATGGCCTGCGAATGCTCCGAATCAACGGATCGTTTCCTGCTTTTTCACCTGCCGGGGATTTAATCGCATATAATCACGGTTTA…
>F01_transcript_101089
ATGGCGTCGAGACTCCCGATACAGGTGATGAGCCCGAGGAAGGTCAATTCTCGTGGCCACACAACAAATAATCCCCACCATAGCTCATTCTCCTGGAGGCGCACGTTAGCATCCGATGACTTTCTTTCCTCCCTCCCCCTCGCCAATTTGTCTCCTCCAGGGCATGTGCAGCCATTATTAGTTACATGTGCTGCCGGGGCAGCGCCCGCTGCAGCAAATCTGGCTCCAGGGACGCCCGTCAGGCCGACCAACATACTGGTGGTGGGTGCTACCGGAACTCTGGGCAGACAGGTGGTCCGTCGGGCACTAGACGAGGGCTACGACGTTCGCTGCCTAGTTAGGCCTAGACCTGCCCCTGCTGACTTCCTTCGCGACTGGGGTGCTACTGTCGTCAATGCA…
>F01_transcript_10109
ATGGATTTTGAACTGAGAAGAGCGAGAGAGAAGCTAGAGAAAGAACAGAAGGACAGGAAAGAGAAGGCGAGATTGAAAATGGAAAGAGAGAGAAAAGCTAAGCAAGAGGCTATTCGACAGCGGGAGGCCATTGAAGCCGCTCAGAGATCTCGTAGGATCGATGCTATGGAAGCCCAACTGAAGGCAGATCACCAAATGGAAGAAAATCTACTCGCTGGAAGAGGAATCGTGTTTAATCGTGTCTTAGAAGCCGTATCCTATCAGGGCTTTGGAGATAAGATCAAACTACCATCATCCTGCTTCACGGAGTTGTCCGAGCAAGGTTCGTTTGACAAAGGGCCTTTACACTTCCAGTTGTCTGTAATGCATCATGAGGATCTTTCAGACGCGGAAGGTGCT…
>F01_transcript_101091
ATGATACATCGTCTGAAAGGTCACCGTTTGCTCGTTTTACTAGTGGCCTTGGATTGCGCTTGTCTCCAAAAGCGCCTCAGCCAGATGAAAATTCTGAAGGAACTTCACCAGCTGCACAGTCCCAATTTTATTGGTACATTCACAAAAGGGTTAGTTGACTCATCTAAGAGTGCAGTTAAGGCTGTGCAGGTCAAGGCTCGACATGTTGTATCTCAAAATAAACGAAGATACCAGGAAGGTGGATTTGATTTAGATATGACGTACATCACAGAGAACATCATTGCTATGGGATTTCCTGCAGGTGATATGAGCTCTGGTTTTTTTGGATATGTTGAGGGATTCTATAGAAATCACATGGAAGAAGTGATCAAGTTCTTTGAAACCCATCACAAGGATAAA…
>F01_transcript_101093
ATGTATAATTATTCTTTTCCTTCTTCTGTTTTGCTAACTTCTCTCCCCCCCTCCTTTGGTGCTTGTTTTTTTCCAGTGAATTATTTTCCAGTCACCACATTCGGTTTACTGGTTGAGGAGATAGATGTTGGAGAGGCTAAATTGCGGCAGGTGGTCAGTGGTCTGGCCAAACATTGCAGTCCAGATCAGTTGACGAACCGCCATGTGGTACTTATCACTAACGTGAAACCTGGAAAACTAAGAGATGTGATGTCAGAAGGATTGAAAGACACTTGGAATGAAGAAGAAGAGAAGATGCTAGTTGAAGCTCATCAAAATGTTGGGAATAAATGGGCAGAAATCGCCAAACGAATTCCAGGAAGGAGCGAAAACTCCATTAAAAACCACTGGAATGCTACC…
>F01_transcript_101095
ATGTCTCCGCCTTTGTTGGGTGTTGAGGGGGTAGGTCAGGGCAATGCGTCTTTAGTGGCTTCTCAAGTCTCCATGGACTCTGTTTCTCCTACTGGCTTGGGATTGAAAGAACGAAATTACCTTGGATTGTCAGATTGTTCCTCAGTAGACAGCTCTCCGGCGTTGAGCATATCTGATGAGAGTAAGAGTAATCTAAATCTCAAGGCTACAGAACTGAGGCTTGGTCTTCCTGGATCTCAGTCCCCAGAACGAGATCCAGAATTTAATCTGCTGGTCTTGGGAAAACTTGATGAGAAACCCTTGTTTCCTTTGATTCCTTCTAAGGATGGTATCTGCTGCTTATCGCAGAAGACTGTTGTTTCGGGTAACAAAAGGGGGTTCTCTGACACTATGGACGGC…
>F01_transcript_101097
ATGTATGCACAACAGAGCGATTCGATTATTAGAAAAGAGCTTAAGAGTCTCTGTTGCACTAATGGATGGTCTTATGGTGTTTTTTGGCGTTTTGACCGCAGAAATTCTTTGTTGTTGACTATGCAAGATGCCTACTACGATGAGGAATTGGGAGCTGTGATCGATGATATGTTTCTACAAGTCCACATGCTAGGTGGAGGAATAATTGGCCAAGCTGCTTTCACTAAGAAACATAGATGGATGTTCTCAGATGCTCATTACGAGGGACAGACTTTTGTTGGATCAGTTGGCAGATGTGATGCATCTCAGGATGATTCTGAGTTTCATCACCAATTTGCTTCTGGAATTAAGACAATTGTGGTGATCCCTGTTGAACCACATGGGGTATTACAATTTGGA…
>F01_transcript_1011
ATGTTAGAGAAGATCGGGTTGCCTCCAAAACCATCACTGAAAGGGAATAATTGGGTGGTTGACGCCACACATTGCCAAGGATGTTCTTCACAGTTCACTTTTATCCATCGCAAGCATCACTGTCGCAGGTGCGGGGGAATTTTTTGCAGCAGCTGTACTCAGCTTAGAATGGTCTTACGTGGACAAGGTGACTCACCGGTGCGTATTTGTGAGCCCTGTAAGAAACTAGAAGAGGCGGCACGTTTTGAAATGCGACATGGACACAAGAATAGAGCAGGAAGAGGTGGTCCGAAACTTACACCCCAGTATGAGGATGGAGTCTTAAACAAGATTATGGGTAATGATGAACAGGAATTGGCATCTTTTGGTCATGAGTCCAACATCAAAATGGTTTCAAGC…
>F01_transcript_101100
ATGTATTACAAGTGTGACCTTCGTGAACAGGTGCTATCTCCAGAGTTCTTTGGAACGAAGTTCGACGTCATTCTTGTGGATCCTCCTTGGGAGGAATATGTTCACCGAGCTCCTGGTGTAACTGACCATATGGAGTACTGGACATTTGAAGAAATCATGAATCTTAAGATTGAGGCAATTGCCGACACACCTTCTTTCATTTTTCTTTGGGTTGGTGATGGTCTTGGTCTTGAGCAGGGAAGGCAATGTCTGAAGAAGTGGGGATTTCGTAGGTGTGAAGATATATGTTGGGTGAAGACAAATAAAACCAATGCAACTCCAGGGTTGCGCCATGATTCCCATACTTTGTTTCAGCGCTCAAAGGTTGACAGTTTTATTCTTCTGCTTACTTTCCCAATT…
>F01_transcript_101101
ATGGATAATATTGAGGAGGACATCCGTGCGTTGCAGCTTGATTCATCTGAAGATAAGAATGTGGTGGCTAATGCAGAAGATGGGGTGCCGGAAGAAGTTGAAAAATCTGATAGAATCGATGAAGATTTGAGAGACGAGGTTAAAGAAAATTCCCAGCCGGTGCATTTGGAGCCAAAAGTTGCTCTGGAAGTGATAGAAAGAGAAATCTCTGCTCCAGAGGAAACTGAAAATGAGGTTGAAGATAATAAGAAGCGACACTTGAATGTAGTATTCATTGGCCATGTTGATGCTGGAAAGTCCACAATCGGAGGGCAAATATTATTCCTTAGCGGACAGGTTGATGAGCGTACTATCCAAAAGTACGAGAAAGAAGCGAAGGATAAAAGTAGAGAGAGCTGG…
>F01_transcript_101103
ATGGTGACTGAACTCTCTCGACCGTCATCATTAGAGGTAGAGGAAGTTATTCAGCAACTTGTTCAAAATATATTGCAAAGATTCTTTAAAGAGGAGAATTCCTCTGATAAGATGGGAGATTCAGCTACAAGTGACCAAGATCACCAAAATGAGAATGATGACTTTTGTGATAACCATAGGCACTTCACGGGACTACCTAGCAAAGCTGCTTTTCTGGTCAATATTTTGCTATTTTTCGTTTGTTTACTCTTTTTGGTGCTATACTTTCTTATTATTCATTTTGATTTAAATAATTGTTTAAATATGAAACAAAAAACACTAAATAGTAAAATTTTACGATATAATTGA
>F01_transcript_101105
ATGAAAAGAGGCGAGGCATCTGTGGTGAACAGAGTAACTATCTCCAACTTTCTAGGAAATGCTAGTAAGCAGAACATTTCAAGGTCAGCATCAGATACAGGTGACAGAGTATCCAGAAAGTTTCTTTCTGATGTATCTGAAAATTTTGCCAATAGTCAATTCAAAGATTCTGCATCAGACATTATTTTAGAGCCTTTTGGACAGTCTTCATCCGGGAGGTGGTCAAAGAATTCCAGAGCAACTTCTCCATTGGACGTTATTCGATCAGATAACATTGATTTTGAGGAAGAAAATGAGTTAACAGTACCTTCTAGTCCAAGGACCTCTGAAATAAACGAAGAATCCTATGCTGTAAATAGTCTGGCAACATCTGCTACTGACATATCATATAGCATGAAT…
>F01_transcript_101109
ATGGCCGCCACAAGCACCACCAATCTCTCTCCTCTATCACCACCTCTTGACAACAAGCCCTACTCTCTTTCCTCCAAAAACCCATCGAACCTCCTCTTCTCTCTTTCCTCCAAAACCCTAACCCCAAAACCCTCACTTTACCGAACCAACAAATCCCTCTTAACATCCTACTCCAAAATCCCCATCTCCGACGTTATCTCCTCAAACAAACAAAACCCAGATGACCAGGTCTTTGATAATGACGACAAACCTCGGGAAGAGTGCGGCGTTGTCGGAATTTACGGCGACCCAGAAGCCTCCCGCCTCTGCTACTTGGCCCTGCACGCGCTTCAACACCGCGGTCAGGAAGGAGCCGGCATAGTCACCGTTCATGAAAAGGTGCTCCACTCCGTCACCGGC…
>F01_transcript_10111
ATGGATGAAGATTTTGATATTCCTCCGGCTGATATGATCAATGGAGGAGAGGATTTCATGGATGATGATGAGCCAGTCTCCTTCATGAAGGTCGGTGAAGAGAAAGAGATCGGAAATCAAGGCTTAAAGAAGAAGCTTCTCAAGGAAGGAGAAGGTTTTGACACCCCTGATAATGGCGATGAAGTTGAAGTTCATTACACTGGAACTTTGCTTGATGGAACTAAATTTGATTCGAGCCGCGATAGGGGAGATCCATTCAAGTTTACTCTCGGCCAAGGGCAAGTCATTAAGGGATGGGATCAAGGTATCAAGACAATGAAGAAAGGGGAAAATGCTATTTTCACCATTCCTCCTGAACTAGCTTATGGTGAGTCAGGTTCTCCTCCAACCATTCCGCCC…
>F01_transcript_101112
ATGCACCAGGAAATCGCCCCCCTCTTTTCTGCGGAGTTTTATACTGGTTGGCTTACACACTGGGGAGAGGATATTGCGCAAACAGATGCTACTTTTACAGCAGATGCTCTGGAAAAAATCTTGGAAAAGAATGGGTCTGCTGTGCTTTATATGGCTCATGGTGGAACAAACTTTGGATTTTATAATGGTGCAAATACTGGTGCGGGGGAGTCTGACTACAAGCCTGATCTTACATCCTATGATTATGATGCACCCATTAGAGAGTTTGGTGATGTGGACAACGCAAAGTTCAAAGTGCTTCAGAGAGTTATTCAACAATATAATAGTGCAGAATCCCTCCCTCCACTCCCTCCCAATAATGAAAAGACAGGATATGGCGTTTTCTTTTGCAAAAAAACT…
>F01_transcript_101117
ATGATGAAGGTTGCGAGCAAAACCAATGATTCAGCTGGTGATGGCACAACAACTGCAGCAGTTCTTGCACGTGAAATAATCAAACTTGGTCTATTGAGTGTGACCTCTGGAGCCAATCCAGTTTCAGTGAAGAAAGGGATAGATAAAACAGTTCTAGGCCTGGTTGAAGAGCTAGAGAAGAAATCAAGGCCTGTTAATGGTCGAGATGACATCAAAGCAATTGCTTCAATCTCCGCTGGAAATGATGATAATATTGGTACTATGGTTGCTGATGCAATTGACAAAGTTGGTCCCGATGGTGTCTTATCTATTGAATCCTCATCCTCCTTTGAGACAACTGTTGAAGTAGAGGAAGGAATGGAGATTGACAGAGGATACATCTCCCCGCAATTTGTTACC…
>F01_transcript_101118
ATGGTTAAGACTGAGTTTCGAGTTTTTACATCTCCGGCCAGCATCGCCTCCCTTACATTGCCATTGGAGCTTTCTTACAAGCAGTGTCGTGGCTTGCTATTGCATTTGTCCCCCACATCAAGCAGCTCATTTTTCTTAATTACCCTATGTCTACTTCTTGGAAATCTTGGTGCTTCAATAGTTGAAGTCGCAAATGATGCCATTGTTGCGGAGACTGGAAAACAGCCCACTTCCTCTTTAAGAGAGTCACAGTCAGCTTCCTCAGGTGAGCTACAGTCATTTGTTTGGATTGCCGCCTCCATTGGTGGGATGCTTGGTAACCTTCTAGGTGGTGTTGCCATTGACTGGTTCTCCCCTCAGGCAGTGTTCTTGCTGTTTGGGATTCTTCTTAGTATCCAG…
>F01_transcript_101119
ATGAAGTCTTTGGGTTTGGGAAAATATGACAATGAACTAAGCTTGGAATCGGTCAAGTTAGTCATTATACCCAGGGTACCTCCAGTGAGTCTTTCCTGCTTTAGGTTACAACTTACACAACACGAAAACAGAGGTCCCAAATGGTTTTGGATGTGGATTAGGTACACTGCAGCTGATCTTGTATACCATTTACTGCAAAAACCAACTGCTGATGAATCCTCATCCCTGACTTGGATACTTAAATGCTAA
>F01_transcript_101120
ATGGATAAGATTAGTAATTTTTGTAATCATTTTTGTAAACCATGGTTGCAGACAATTGAAATATTGGATGAATTAATTGAGAATGGTTTTGATAAGATGGATGTAAGGAATAAGGATGAAGTAATATCACAAATGAGATCTGCTGTTGCTAGCTAA
>F01_transcript_101124
ATGGTCCTAGAGCTCAGTTTATTGTTTACAGAACTAGAGTTTGTTAAAAAAATATTGAATAATATAGATAAAACTTATCAGAAAGTAGATACAGAAGGGTACATAAAGAAGTTATTAGGAGACGGTGTTGTGACAACAAGTGGCGAAAAATGGGTAAACAAACGAAAACTGGCCAATCATACTTTCCATGCAGAGAGCTTGAAAGTAAGTCCTGTTTTATTATGTTTTCTGTTTCAAACATCATTGTTAGCCTATATGAAAAGGTTGATATATTGTATGATCAATGAAGCATAA
>F01_transcript_101130
ATGATCTATCTAAATTTGGTTTCAAGTTTACTACAGAGGGATCCAAGCATACGCCACCTCACCAGTCGTCATGTGATTTTAAGTGGAAGGATTACTGCCCATTGGTTTTCAGGACTCTTAGGAACTTATTTAAGGTGGATCCAGCTGATTACATGCTTACTGTTGAGCAGATGTTATGTAACATCTAGCATTACTGTTGAGCAGATGTACACTGAGATGGCTTCTTGCCACAGAGTCTGCCATCACTGCATCCAGATCATTAAGACAGTGACCATCCCTGCCAAGCTCTGCAAGAGGGAGATCACCAAGCAGTTCCACAACTCCAAAATCAAGTTTCCATTGGTGTTTAAGAAGGTTAGGCCACCAACTAGAAAGCTGAAGACAACATACAAGGCGTCT…
>F01_transcript_101131
ATGACGAAGAGGGACAGAGAGGGAAAGAGAGGCGGTTTGGTTTTGGATGCTGAATGTGACACTCTGAAGGAATTGGTGGAGAAATATTCAAATTATACTTTGACTTTCGCGGGACATTCCCTTGGCTCTGGTGTGGCGGCATTATTGGCAATGGTTGTGGTGCAGAATCTTGATAGATTGGGGAAAATTGACAGGAAGAGGGTCAGGTGCTATGCTATTGCTCCTGCCAGATGTATGTCTCTAAATTTGGCAGTGAGATATGCGGATGTTATCGATTCGGTTGTTCTCCAGGATGATTTCTTGCCCCGTACAGCCACTCCGTTGGAAGACATTTTCAAGTCTCTTTTCTGCTAA
>F01_transcript_101133
ATGGCCGATGTAATCTCTCTAATGGACATAGACGATGACAATCAAGAAACCCAATCCCTCAAACCTAACAACAAGGGTAAAAACGTCGTCGCCGGAATCCCGCCGGACATCAAAGCCACGCCGTGGGTCGAAAAGTACCGCCCTCAGTCCCTCGCCGACGTAGCCGCTCACCGTGACATCGTTGATACTATTGATAGGCTTACGAGCGAGAAGAAATTGCCGCATTTGCTCCTGTACGGACCACCTGGTACGGGAAAGACGTCGACGATTCTGGCGGTGGCTCGCAAGTTATTTGGTTCCCAGATGCATAATATGGTATTGGAGCTTAATGCATCTGATGATCGAGGAATTGATGTTGTGAGGCAACAGATTCAGGATTTTGCTAGCACTCAGAGCTTC…
>F01_transcript_101134
ATGTACAAAAGAAATATACAGAGACTGACTCAGACATACTTGACACTCTCCCTCCAAGACATAGCCAACACTGTGCACCTGAATAGCCCCAAGGAAGCTGAAATGCATGTTCTTCAAATGATCCAAGATGGTGAGATATATGCAACAATTAACCAGAAGGATGGAATGGTTAGATTCCTAGAGGATCCGGAGCAATATAAATCATGTGAGATGATTGAGCGTATTGACTCATCAATCCAAAGGTATGCTTTTCATGAGCTTGTTCTAGATGAAAGAAAACTACAATTGATTTGGCTAATATTATATCCTACAAACTCGAGAGGAATTTTAATTGGTAAAGAAGTGGCCTTATGGAGGTGGTTGATCTAA
>F01_transcript_101141
ATGGATAGACTCCCAAAATGTGCAGCAAATTATGTACCGCTAACTCCTGTCACCTTCTTAAAGAGAGCTTCTGAAGTTTATGCTAATCGCACCTCTGTTGTATATGCCCGAGCTAGATTCACCTGGCAGCAAACTTATCAGCGTTGCTGTCAACTCGCTTCCTCCCTTCGATCCTTCAACATTGCCAAGAACGATGTGGTGTCAGTTCTATCTCCAAACACTCCGGCACTGTATGAGATGCACTTTGCAGTGCCCATGGCTGGTGCAGTGCTTAACACTATCAACACAAGGCTTGATGCTAAGAACATCGCTACAATTCTCAGCCACTCGGAAGCAAAGGTGTTTTTTGTTGACTACGAATATGTGCCTCTTGCACGAGATTCACTTCGGTTGCTCATG…
>F01_transcript_101142
ATGGTTGGCTTCGGTCTTGTTTATGGTGGACCTGGGGCTGTTTTCTGGAGTTCACTGGCAAGGGTGACTTCATCGTGGGTCATCTCACCTGGGATGGGAGCAGCAATGTCGTTTCTTGTCTATAAATTCATTCGTAGGGTATGTTCTTGCTATAAAGACTTGAAACAATAG
>F01_transcript_101144
ATGGTTCAGAGGCTCACGTATCGCAAACGACATAGTTATGCCACCAAATCCAACCAGCATAGGGTTGTCAAAACTCCCGGAGGGAAGCTGGTTTACCAGACGACCAAGAAGAGAGCCAGCGGGCCTAAGTGCCCCGTCACTGGAAAGAGAATCCAAGGGTGTGAATTTTACTTGTGTATTTATTTTGAATTTTCTGCTTAA
>F01_transcript_101147
ATGAATCCATCATCGAATCAAAACCCCCAAAATCTGAACCCTTACTTGCAAAATTCCCTCCAATTCTCCATTTTTTTACCCCAAACAAACCCTAACCCTAACCCCAATTACTCAATCTCGAATACCCATATAGACCCTAATTACTACCCTAATTCTGTCTCAACCCCTAATTTGAATGACTTTCTCTCACTATCTACGGTCTCCAAGAAACGAAGACGAGGCAGATCACGCAATACGACACCGTCTGTACCATCACAGCAGCATCAGGTATATCAAATGCCTTCATTCTCAAATGGTAGTAGTATAATTGGCGATAATAATAGAAATGTGCAGTTATTGTCATTGCCGTCTACTTCAGCTCATTTTATGGAACCTAGTATGTCGAATTTTTGTGGTCCT…
>F01_transcript_101149
ATGACTAGGGGACGCCGTCGTGAACACTACCAATGGAATATGGATATTATTGGTGTAGCTGACATAATAGCTGAAGCAGAACTTATCTCTTCTATTGTCACCTTTTTCAAGCGAATCGGGATCACAGCATCTGATGTTGGGTTTAAGATTTCTAGTCGAAAGGTTTTACAAGAAGTTTTGAGTTGCTACTCCATACCAGAAGCTTTATTTGGAAAAGTTTGCATCATTATAGACAAGAAAGGAAAAATCCCAATTGATGAGATAAAGAAAGAGTTGGAGCATGCTCAGTTATCAGATGTGGCTATTGAGGAGCTACTGCAAGTTCTCTCCTTGAAGTGCTTGTCAAAGCTGGAAGAGAAACTTGGACCTGAAGCAGTAAGTGATCTTAAACGGTTATTC…
>F01_transcript_101150
ATGAAGAGATTTTGCAAAATTCTGGAGGCACGTGGTGGAATAGATTCCGGAGTGCAGAGTGCATCAGTGGGAGTAAAATCAATCTGGTCCCCATTCAATGAGGTCAAGACGGGACTGCAACATGGGCAAAAACTTGTAGGATTATCAATTATAGAGTTGTTGATTGTTTCTGTCCTACTGCCTTTCCAGTGA
>F01_transcript_101151
ATGGCTGTCATTCCTCTTGGCTTGCAGCAGCGCGATGTTATTGGTGTTGCTGAGACGGGTTCTGGTAAGACTGCTGCTTTTGATCTTCACATGGTGACTTGCATATCTAGATTGCCTCCCATGAGTGAAGATAATGAGGTTGAGGGTCCTTATGCTGTCGTGATGGCACCAACTCAAGAACTTACCCAGTTGAATGAGGACGAGACTGTCAAGTTTGCTCACTATTTGGGTATCAAAGTGGTTTCCATTGTTGGTGGGCAGTCCATTGAGGAGCAAGGGTTTAAGATTAGACAAGGGTGTGAGGTAGTGATTGCTACTCCAGGACGTCTTATCGATTTCTTAGAGAGGCGTTATGCTGTTTTGAACCAGTGTAACTATGTTGTTAAAGAAAGGAGAGGT…
>F01_transcript_101153
ATGGCCACCACTGCAGTTATTGGACTTAGTGCGGGAAAGAGGCTTTTGAGTTCCACCTTTTATTACTCTGATCTTGCTGAGAAGCTGTCGAGTAGCAGCGATCATCTTGGGTTCTCACACCATCAGGTTACTTCGTCCAAGAACGTGATCAATGCGAAGAGGTCATCCAACTATAGCCCTAATTTTCTCTCCAGTCGAGATGCACAATCCATCAAGGCAGTAAAAGAACATGTGGACACTGCTTCTAGTCCTTCAAATGTAGAGCCATGGATTCAGAGTTCGAACCACTTGGAGGATGAAATCGCTAATCCTGAATTTTCAGTAGATGCTCTCCTCTTGTTGCAGAAGTCTATGCTGGAAAAGCAGTGGAATCTGACAACTGAGGAGACTCTTTTAGCT…
>F01_transcript_101157
ATGGCCACCCTCTTCAGGGCTCTTCTTCTTCTTCTCTCTTTATCAGATTTATGTGCTAGGATCCATAGCCTTGGAGTTGGAATTAACTATGGTCAGATTGCCGACAATCTCCCTTCTCCTTCCCGTGTATCGTCTCTCCTTAAATCACTCAACATCAGCAGAGTGAAGCTCTATGATGCTGACCCAAAAGTTTTAACTGCATTTTCCAATACGAATGTTGAATTCATCATTGGACTTGGAAATGAACTTCTTCAAACAATGAATGACCCCATGAAAGCTCAATCTTGGATTCAAGATCATGTTCAACCACACCTTAGCCAGACCAAGATTTCTTGCATACTTGTTGGAAATGAGGTCTTATTAAGCAACAATAATCAGTTAAAGTCTTATCTCCTACCT…
>F01_transcript_101158
ATGACATTCACAACTTGCAATTTTTTTACAGTGCAGTTGGTAGCCAAACATTTATACCAAGGTAAGCAATTCAGTATTATTAGGTTACCAAATTATTTTGAACATGATGCAGTTGGTAACCAAACTTTCATGCAGTGGGTATCCAAACATTCATACCTAGGTAACCAATTCAGTTTTATTAAGTTACCAATTTATTTTGAATGTGTTGCAGTTGGTAACCGAACCTTCATGCATGCAGTTGGTAGTCAAACCTTCATGCAGTTGGTTGTCAAATCTTCAGGCAAAGGTAATCAATTCAGTTTTATTAGGTTATAA
>F01_transcript_101159
ATGTCCCCCCTCAGAACTTCCTTACCTGGAACATCTGGAATTATACTTGCATCTGACAGTAGTCTGAATAACATAGATGCTTCATCCAACTTGTTTGCAAATCAGGAAAGTTCAAACAAAGATAATAGTCTTCCTGCATCGGATCAGATGTCATCAACTCCAGCCAAAGTTCAGGTGCAGATGCCATGGCCGAACCAGATTCCTCCCTATATGTATAATTATCAGAGCCCTGTTCAAGGTTATCCTTTCCATGGTATGCAGCCTGTACCGCCATATTATCCGGGGCATATGCATTGGACTCCAAATATGGATGACTCTAGCCATGGTCATCGCCAAAAGTCATCTTCAAGAAAAAAGGAGAAATCCCTTAATGTGAAAGTATCCGAGACTTCAGAAGAA…
>F01_transcript_101160
ATGGATACTTCACAGTCGACTCAGATTCAGCAAGCTCAACTTGTAGCGATTTTGGGGCCTGATCCCGCCCCATTTGAAACCCTAATCTCTCACTTGATGGCCTCTTCCAACGAGCAAAGATCGCAAGCCGAACTGATTTTCAATCTCTGCAAGCAATCCGATCCGAACTCGCTGGTTCTGAAACTCGCTCACCTCCTCCAGTTCTCCCCTCATGTTGAAGCCCGTGCCATGTCCGCTATTCTACTTAGAAAACAGTTGACTCGTGATGACTCGTACATATGGCCTCGATTATCTCCTTCAACTCAGTCATCCCTCAAATCGTTCTTCCTCTCTTGCGTTCAAAGGGAAGAAGCCAAAACGATTATCAAAAAGCTCTGTGACACCATTTCGGAACTTGCT…
>F01_transcript_101165
ATGGCTACTAAGCTTCTGCTGATGTTTGCTCTATGTCGTTTAATTATGACCGTCGGATTAACAATATTGGATCCGACGGACATCCTTCGGGTTGGTATCCACGCTCACCTCAGCGTCGACCCTTATGAGGTGGACTCAGCTTCCCACGATTTCGGTGGCGAACACCGAGCTGAGCCGTTGGCAGTTTTCCACCCGGATTCAGCTGAGCACGTTCGCCGCCTGGTTAGAGCCGCTTACGACTCGGCTCATGGATTCACTGTCTCGGCTAGAGGTCAAGGGCATTCCATAAACGGCCAGGCTCAAACCGACAACGGAGTAGTCATTCTAATGAGCAGCCCCGGAAAGCGGGCTGGACCAAGGGTATATGAGAGCTTGAGGTACGTGGATGTGTGGGGTGGA…
>F01_transcript_101166
ATGTTTGATCTTTGCTCCATATATTGCAACTTTGATATTGATTTCATGCTACAGGATAACTTTGTCATGATATGCCCTCTTCATGCCTCTTTGAAACTTCCAAATGAGGTATCTGGATCTCATAAAAAAATAGAAAGTGAGATGCCTTCCAAGAAGACAACCTCCCCCAAAAGTGGTGGTTAA
>F01_transcript_101169
ATGGTTATGGAAGACGGAGAGCTTGATTTTTCAAGTCATGAACTGTTCTCCGTTTCAAATATCGGTGATATTGGTGATTTTCCTACCAGTAGTTCTATGGATAGTTTCTTTGATGACATTCTTAAGGATACACATGCCTGTACTCATACCCACACTTGTAACCCACCTGGACCTGATTACTCTCATACACACACTTGTTACCATGTGCATACCAAAATTGTACCTGCCTCAAGTGAAGATAAGGCTCCTAGCGATGATACGGCAGAGTCTGCAGATAAGAAGTCAAAGAAACGGCCGTTGGGCAATCGCGAAGCTGTTCGCAAGTATCGTGAGAAGAAGAAGGCAAGGACTGCTTCTTTGGAGGATGAAGTGGTTAGACTGAGGGCCATAAATCAGCAG…
>F01_transcript_101177
ATGGCGGATCGATTGACGCGAATTGCAATTGTGAGTTCTGATCGATGTAAGCCGAAAAAGTGTCGGCAGGAATGCAAAAAGAGTTGCCCTGTTGTTAAAACTGGTAAACTATGTATTGAGGTCACTCCTGCAGCCAAAATTGCTTTCATCTCTGAGGAATTGTGCATTGGATGTGGTATATGTGTTAAGAAATGCCCATTTGAAGCAATTCAGATCATTAATCTACCCAAAGATTTGGATAAGGATACCACTCACCGTTATGGCCCCAACACCTTCAAATTACACAGGTTACCAGTTCCGAGGCCAGGGCAGGTTCTTGGTTTGGTTGGGACAAATGGCATTGGGAAGTCGACTGCCCTTAAAGTTCTGGCTGGAAAATTGAAACCTAATCTGGGTCGT…
>F01_transcript_101178
ATGGATTGTAGATTGAATTATACGGATTTCAGATGTGTCCACTGTGGGTTTCCTATAAAATCATTATATGTGCAATATTCACCAGGAAATATTCGTTTGATGAAATGTGAGAATTGTAAAAAAGTTGCAGATGAGTACATTGAATGTGAAAATATGATTCTTGTAATTGATTTGATTTTGCACAAGGAAAAGGCGTATAGACATTTGTTCTATAACATGTTTACTCGAGAAACTTTGAATTTTGAGGGTCTGTTTTGGTGGCTGTCTTTTGGCTTTCTTCTTTTGGATGCTTTAAATGTAAAGCCTTAG
>F01_transcript_101184
ATGGGAATGAACATGGTGTCCAAGGGTGTTCAGAATGTGTTGGAGTTCCTTCAAAGTGATTTCCTGGACATGGATGTAATTAGTATTTCTGGAAGACTGCTTCTACGACCTGCCTTACAATATTGGGTATCAAATTTTTGTGCTACGTTTACGGAAGACAAGGGACGAAATTATGAAGTGTACTCTCTCTATATATGTAGATATATACTTTGA
>F01_transcript_101185
ATGAAACAGAGCACAAAAAAAGTGAAGAAAGTTTGGAACAATGTTTGTGCCATACTTTATAAGGACTTGATGAAAAAAGCAAGAGCTGAGTCAATGAAACAGACGAAGTGTACTTCCTACAACTTTGAAAAAACGGTTAAGCACCCACCTTTATTTATAAAGGCTGAACATTGA
>F01_transcript_101187
ATGGTCACCGCCGTGCACGGTGACGGCAGGTACTGTGTTTTCTTCAGGAGCTCCAAGGTGCAGCTTGAATTCTCTAGATCGGATCTTAGGTTGCACCGCGAGTGGGTGCATGGAAATTGGGTGCCACCGTTGGAGCAAGAAGAAGATGAAGAAGTAGCAGAAGAAGATGCACAAGAAATTCCGGCCCTTGAAGAGTCTAATTAA
>F01_transcript_101188
ATGGTGAAGTTGGTAGCAATATTGAACATTGGGTTTGTGGGGGCAGTAATAGCAGTAACTCTTCTAGCTTTCCATGGAAGTATGCGGCTTACCTTCACCGGATTTGTATGTGCCGGATTAACCATTGGCATGTATGCAGCACCCTTGTCAGTCATGAGGACAGTGATAAAAACAAGAAGTGTGGAGTATATGCCATTTTTTCTCTCATTCTTTCAGTTCCTTAATGGGGGCGTATGGTCCTTCTATGCTGTGCTCGTAAAGGATTTTTATATTGGAGTGCCCAACGCAATTGGGTTTGTTTTCGGCACGGCCCAACTAATCACATACATTATTTACAAGAACAAGTCAAAGCCCACAAAATCAACGTACGAAAAGGAAGAAGGCGGGTCAGCCCATCTT…
>F01_transcript_10119
ATGGCCGCCATTAGAGTTCCTCTAGCATCGTCTCTCACTCTAATAGCTTCAACTTCATATTCTTCTTCTTACCCTTCTTTTATTTTCACGACGTTGCGCACCACCCCTGTATTGGGCCTTTCTTTTTCAATTTTACCCTCCTCCTCTTTCTGTTCTCGTAGAGGGAAGCGAATGGCTCACTCTATTGCTCGTGCCACTCTGGGTCTTACTCATCCTGCTCAAATTGACGCCCTCAAGATCTCTTTTGCTCCGAAAGAAAGTGATTTGGCAGAATGGAAAGGAGATATACTTGCTGTGGGTGTTTTAGAGAAGGACATTTCCAAAGATGGAAACTCAAAATTCCAGAACTCAATCCTGCAAAACCTAAATTCCCAATTAGGTGGTTTGTTGTCTGAAGCA…
>F01_transcript_101191
ATGCTGGGAATGAATTTGTGGGGAACCATATACAACATGGCCTTCATGTTTGGCTGGCCTCGTGCCAGTGGGTACGAGGCAGTTCAATTCTGCAAGCAGCATCCAGAGGCAGCATGGGACATTTTTCTCTTTTGTCTCTGTGGTGCAGTGGGCCAGAATTTTATATTTCTAACCATAAGCAGGTTTGGTTCTCTGACTAACACCACCATCACCACAACCCGCAAATTTGTCAGCATAGTGGTGTCTTCTCTGCTGAGTGGAAATCCTTTGTCTGCAAAGCAATGGGGGAGCGTTGGCATGGTCTTCGGTGGGTTGTCTTACCAAATTTACCTGAAGTGGAAGAAATTGCAAAGATTGCAGAAGAAGCGGAAGTTCATGTAG
>F01_transcript_101192
ATGACTATTTCTCCTCCTCTGTCTCTGGTTGAAGCTTTGACCCCTGCGGTTATTGAAAAGAAATACATTACAATTGAAGAGTTGGAGAAGCATAACAAGCCTGACGACCTATGGATTTCTATCCAGGGCAAGGTTTACAATGTCACCCACTGGGCTAAGGAACACCCGGGCGGAGATATCCCCCTCCTGAATCTGGCTGGCCAGGACGTGACTGATGCATTCATTGCTTTCCATCCTGGTACTGCTTGGAAATATCTTGACAAATTCTTTTCTGGGTATCACATTAAAGATTACAAGGTTTCAGAGGTGTCTAAGGATTACAGAAGACTTTTTTCAGAGTTAGTGAAAGCTGGGGTGTTTGAAAAAAAAGGGCATGGCTTCACCTACTCACTTTGTTTC…
>F01_transcript_101193
ATGATGTCGCCAAAACAAACATCTGAAGATCGAGGGGCTTCTTCACATCCCGCTACTTTTAGGTACACTCCATTGCAGATAATCCATATTATTGGCAATTTCATGAGAATATGGTCGGTTTACTCCATGTACCACTACTTATCTCAGACAGGAGCTTCTGTTGTGCTTTTTACATTCAGTTGTGTAGTTCCATCAGCCTTCATATTCTTAGTTTTGCAGAAGCCCTGGAAGGGAAGGCCACTCTCTAATGCACAGGTAGTTCCTTCTGTGATCAATGGTGGCATAACTGCTCTATACTTCATCTTTTGGGGGAAGGGCCTCAAGTCATGTGGTCCTGTTAGAGCTGTATTGGCCGAGTATTCTGGCGCTGTTCTTGGAGTATTATCTGCAGTACTGTAT…
>F01_transcript_101195
ATGGGATGCTTTGTGTCTACCCCAAAGGACTCTGGTGGAAACAGAAGGAGGCCAGGAAATATCGGTGAAGTTACGGTATTTGTTCCTGGCTTACGGATTCCAAAGCCTGTGGATTTTTCTCAGTCGTTAGGTGACCACTTGTCCAAGAGTTTGGTGGAACGCCTCTCAGCTCTTAGAACCCGAATAGTTGTAATGGCTGGTCAAGAAGGTCCAACAATCACAAGAACAAGGAGAAGAAGTGCTACTCAACACGGGGGTTCAACATTGGGAGATCTTATTCAGGCTCTTGAAGATTATTTGCCAGTTCTTATGGGATTGGTTAAAGATGGAAGCCCATTACAACACAAGGTACAGTTCGTTTGGGTAAATCAGGAGGATGATGCAGAGGAAACGGCAATG…
>F01_transcript_101199
ATGCATTTCCTAAAGGTTGTCCCGGCCCTTTTGGCTGTAACTCTTGCTGCTCCTCAAGCAATCGATTTCCTGGCAATTGACGAGGAACTTCCCGAAGTTTCCACTGTCAATCCTGTCACTGCCTCGCCAACGATCATTACTTATGACCCAACCGCAGCCATCGAATCCGCCGCCTCCAGCCCAACCACACTCCAAAAACGCTCTCCCTCCGTCGACAACAGCGGCTGCTCCGCCTGCCAGGCTCAACCCACCACCACAAACTACCTCAACATCAACGTGGACAGCGATACCTCCTTCCTCGCTGACGCAAACGCCGCCGCCGCCGCAAACAATGCGCCCACCCCAGCTGGTTATGCAAAAGTATTCAGCAATTTGAAGGCTGCAAGCAATGGATATGTT…
>F01_transcript_101203
ATGTTGGATGAAGGGTTCAATGCTAAATTAGGTGATTTTGGGCTGGCAAGGCAAGTTGAGCACGATAAGTCACCGGATGCCACGGTGGCTGCCGGAACAATGGGGTACTTGGCTCCGGAGTATTTATTAACAGGAAGAGCATCTGAGAAAACTGATGTGTTTAGCTATGGAGCTGTGGTACTTGAGGTGGCTAGTGGGAGGAGACCAATTGAGAAAGAAGTTGCTGGTGTGGGGAAAGTTGGTGGTGTTAACAGCAATTTGGTGGAATGGGTTTGGAGTTTACATAGAGAAGGAAGGCTTTTAGGGGCAGCTGATTCGAGGCTTGGAGGAGAGTTTGAAGAGGGAGAAATGAGGAGGGTGTTATTGGTTGGGTTAGCTTGTTCTCACCCCTGA
>F01_transcript_101206
ATGTATCTCACAGCAGCCCTTGTCATCCTAGCCATATTACTCTTCACTTTAATGTCTACCAAAAGATTTAAAAACAGCAAGCCTCCATTGCCACCCGGTCCTCGAGGCTTGCCTCTAGTTGGAAACCTCCTCTCTCTGGAACTGGATCTCCACACACAGTTCACGAGCCTAGCTAGGTCCTATGGTCCTATCCTAACCCTTTGGCTCGGAAAAAAGGTGTGTGTCGTGGTCAGCTCACCATCATTGGCACGTGAGGTGCTTAAAGATCAAGACACCACCTTCGCTAACCGCGACGTACCTGTCGCGGCCAAAGAGGCCACGTATGGTGGCTTAGACATTGTCTGGTTACCGTATGGGTCTGACTGGCGCATGCTGAGGAAGGTTTGTATGCGTGAAATG…
>F01_transcript_101208
ATGGTTGCTCAAGAATTAGCTGAAGCCCAACATCTGTGGTTCAAGGAAACTGCAACGGAATGTTCACAAGCAAGGAACTCAGTCAAAACTCGAAAGATAAAGATTAGGATTGTGCTGGTGAATGTTGAATTACCAATTCAAGGTTTTGACATTGAGAACGATATGAGGATTATCCAAAGGGTCTTGGCCCAATAG
>F01_transcript_101209
ATGACAAGTACTACATCTTCGACTACGCCTGATCTTTCATTACAAATTAGTCAACCCACCGCTTTAGATTGCAAGACGAAAGAACTGGGCACTCATCGCGGAGGGATGGTGATGATGATAAAATCACCCTACAGTGAGCGGAGCTCAACCACAACAGATTCCGGTAGCAGCGGAGGAAGTGATTTAAGCCATGAATATGGATTCAGCTTGCCACCGGAGCTGAGGGCTTTTAGTGTTGGGCCTAATTTGAGTTTAGGGTTAGAAATGATGGCAGCTAATTTAAATCCTCCACGGCCTCTACAACTAGGAAATATTCATCATTATCAACCTCAAATTTATGGCCGTGATTTCAAAAGAAGTTCAAGAATGATGAATGGGGGGGTTAAACGGAGCGTTAGG…
>F01_transcript_101212
ATGGTCTTACCTCCCAACTGGAAAAGGATCATCTTCCCCCAATCAATCTCGTGCTCCCAAGAGTGTCAAGTCATCATTCACTTGAGTTACATTTCATGCAATCCTGAAAGCCTAGTGGCCAATGCTATCGAGCTATGCACACCATCCTCTACTGGAGTTGACTCCCCTTCGTTTCCATCAGGAGCTTTGGTTCAATTTCTTTGTTGTACAATACTTTCCTAA
>F01_transcript_101213
ATGCCTCGAGGCAGCTTGGAAAATCATTTGTTCAGGAGAGGCTCTTATTTTCAACCACTATCTTGGAACCTTCGCATGAAGGTTGCTCTCGGAGCTGCAAGTGGGCTTGCTTTTCTTCACAACGCTGAAACAAAAGTGATATATCGGGACTTCAAAACTGCTAATATCTTACTTGATTCGAACTACAATGCAAAACTTTCTGATTTTGGATTGGCCAAGGATGGGCCAACAGGTGATAAAAGTCATGTCTCTACTAGGGTCATGGGAACTTATGGATATGCAGCCCCTGAATATCTGGCCACCGGTCATTTGACTGTGAGAAGTGATGTGTACAGTTTTGGGGTGGTTCTTCTGGAGATGTTATCCGGCCGACGAGCAGTCGACAAGAATAGACCATCT…
>F01_transcript_101215
ATGTCGAATCCATCTACTGTTACTCATCCTTCAGTTTCTGGTGGAGCTATTGGTCTTGGTGGTCCATCCATGCCAGTTGGTACCAATGTTGGGGATATAGGATTGTGGGAAATTGGTTCCAGGGAGAGATTGGTTCTTAGAAACTACAAAGTTTGGGATCTTGGCGCATGTTCAATGCCTCTGCAGGCTGCTCTAGTTAAAGATCCCGGTGTCTCTGTTAACCATGTGATTTGGAGCCCCGATGGTTCTTTGTTTGCTGAAGTTAAGTCTAAAGATAAGGGCAAGAAGTCTGATGAGATAGATGAGGCATTCACGGTGGTCCTCAGCCAAATTAGGCATTCACGGTGGTCCTCAGCCAAGCCACATTCAGAATGCAGATTAGGCTGCTGGCATTCACGG…
>F01_transcript_101216
ATGGAAATGGAGAGCTCTCGTGGATCATTTGATAGATCGAGAGAGCCAGGGCTGAAAAAGCATAGATTGGAAGAACCAATCACTGGTCGAAATTCCAATAGCCGTGCTTTTGTTCAGCAGGCAGCGGCTCCTTTGAGGGAGAGAGAATCAGAGAGTAGTGAATCAGTAAAGGTCGGAGCTATTCACGAGCTAGTTACTCAGTACAGGACTGCCCTCGCCGAGCTGACTTTCAATTCCAAACCGATCATTACGAACTTAACTATTATAGCTGGCGAGAATTTGCAGGCTGCCAAGCCTATAGCCGCCATTATCTGCTCAAATATTCTCGAGGTCCCTACGGAGCAAAAACTTGCATCTCTATATCTTTTAGACAGTATTGTGAAGAACATTGGAAGGGAT…
>F01_transcript_101219
ATGAGCTTGCATGCCATGAACAGTGACTGCAGTTTGGGAGACTTGGAGGGGGGGCAAGGTCTGAGTTGGGAAAGGCGAGAGCAAGATGAGTCAGAGACTCGAAATGTGGAGGCAGAGAGATTGATGGAGAGATTGGAAATGGAAAAGAAAGAGTTTTTAGGAGAAATGCAATTATGCTGCTGA
>F01_transcript_10122
ATGGCCTTTAACTATGGTGTTGCTTATCTTACCAGGTCGGGATTGACTTATTCTTCTCCACGGCATCGATTTCTTGCTCCTCAATTGTATACCAAATTTAGGATTAATTCATGCTCTAGGGTTTCAACTGCAGTCAGCAAACTGAATGCCCCTAATTCTGTTGTTGTGAATAAAGGGAAAGTCCGAGAATTTGGGTTTTTGAAATCTGTTGAGTTGGATACGTTTATAACTAGTGATGACGAAGATGAAATGAGTGAAGGGTTTTTTGAGGCAATTGAAGAATTGGAGCGTATGACTAGGGAGCCATCCGATGTTCTTGAGGAAATGAATGATCGGTTATCTGTTCGTGAATTGCAGCTCGTGTTGGTGTATTTTTCTCAGGAAGGGAGGGATTCTTGG…
>F01_transcript_101220
ATGGTACTACTAGGGAAGATTTTATTCATTTCTTGCATTCTCATACAAACATTTTGTCCCACAATAATTGGCCAGCCTCAAGATTTCATAGCAAGCAGATGTGGAGATAATGGTAACTACACAAACAACAGTATTTATGAAACAAACCTCGATAACGCCCTGTCCACCCTTTCCAACACCAATACCACCATAAACTCTGGTTTCTACAATGCCTCCGTAGGCCAAAACTCGGACAGAGTTAATGCGCTGGCGCTTTGTAGAGGGGACGTTGAGGCCGACATATGCAGGAGCTGTGTGAATGAGTCTATTAGTAAGATAAGAGAGATATGTCCTAACCGGAGGGAAGCAATTGGGTGGTATGATTATTGCATGTTATGGTACTCGAATCGTTCTATATTC…
>F01_transcript_101221
ATGGCAGAATCAAGACGATTGAGAGGTCATACGGCCACGACCACCTGCTGTATCGCCTCCCGTGACCGCCCTGGCCTCGTAGCCACTTCCGGCGAGGATGGTTGTGTTTGCTGGTTCGATATGCGGTGCAAAGATGTGTTATTTGTTATGAATGTGGGGGATAATCCTATTTCATCATTATGTTTCAAGCAAGGTAATGAAGATATTTTTTATGTTTCGAGCGGAAATGAAGTTAAGAGTTTTGATGTTCATCTGGCAACCTCATGGAAGCCATTAGAGAATTACAACTATAATAAAGAGGAGATAAATCAGATCATTGACATTCGTCAGCAATGCCTTTATAAAACGTTAAGAGCTGGCCATGAAAGTATTTGTAGCACTGTGCAGTTCCTTCCTTGG…
>F01_transcript_101226
ATGGAAATTTTACTGAACCAGCCGACCATAGCGGTGTTGATATCAACGGCTATCGCCGGCGGAGCTTATAAGAAGAAGTCTCTTGACCTTTCGGGCGCTTTTATGGGCTTCGTAGTCATGTCCATTCATATCGCTGTCAATTACAGATTTGGAGCAATGTTGCTTGTTTTCTTCTTCTCTTCCTCAAAGCTTACTAAGTTCGGAGATGAGAAGAAGAGAAAACTTGATCCTGATTACAAAGAGGGAGGTCAACGTAATTGGATACAAGTTCTGTCCAATGCTGGTATTGCAACTCTTCTAGTCTTGATTTTCTGGAAGTTGACAGGATCAGAAGACAAGTGCTTGGACTCGAAAGAATCAATGCTTGTAACATCTCTTATAGGCGGCATTATTGGACAT…
>F01_transcript_101227
ATGGCAATGGCGGGGTGTTTGAGATCAACTCTTCCCCTAATCAGTAAAGCTCTGACATCAGATTTGATTTCTTTTCGGGGATCATCTCTTCAACGATCCTTGCTTTGCCCTACTTTAACCAATCCAGAGTTCTCAAGGAATTTTGCCACTAGCTCTGCTCCAAAGGAACAGGAAATTAAGTGGCAACAAATGGATATTGAATATACCTTCTGGCAAATGCTTCATTTATACACCTCACCGAAAGTTGTTGTTTCTATTAGTCATTATTGGTTGTTGGCTGTTTGGACTTGGCTGGCTCAGTTGTCACTGATGTTTCTATTAGTCATTGTTGGCTCACCATATCAAATCGAGGCTGAAGATTCTAGACAAAAGCAATGA
>F01_transcript_10123
ATGGGATGTGTTTATCTTAAAAGAATCATATTTGTCCAGGTCAATTTCTACCCAGGCCAGAATAATGCAGTTGATATTCTCATATTAATTGCTAATTTTAGTATTCCAACGGGTTTAAGATCGGCAGAAGCTGCCCTTTCTAATCAGAAGGCATGGTTTGTACCCGAGTGCCGATCTGTGGTCTTCCCAATGGTGAAGCATCCCTTTATTGTGGGGTTTCTGGTAGTGGAGCTTCCAAAGAGGGAAGTGGAAAGCGAAGGACAAGACGTCAATCAATGCCCATTGCCAGAGGAATGTTATGCTTTGCCCCCATATACAGATCCAAAATCATGGGATATCCAAACTTTCAAGGAGAGCCCTTCGGAAATTTACAAATTCACTGCTGACCAGAAATTAAAT…
>F01_transcript_101232
ATGGATGTAGTCCGGAATTCATGCCCTGGAGCGGGAGCCTGTGGTGGGATGTATACAGCAAATACCATGGCTTCTGCTATTGAGGCAATGGGAATGTCTCTTCCTTACAGCTCTTCTACACCTGCTGAAGACCCATTAAAATTGGATGAGTGCCGCTTAGCTGGAAAACATCTTCTAGATTTAATTAAAATGGACTTGAAACCCCGAGATATTATCACTCCAAAATCACTGCGCAATGCAATGGTGGTAGTCATGGCCTTGGGAGGGTCTACCAATGCTGTTCTACATTTAATTGCTATTGCACGGTCTGTCGGTTTACATTTAACTCTGGATGATTTTCAAAAGGTTAGCGATGAGGTTCCATTCCTTGCAGATCTTAAGCCTAGTGGCAAATATGTC…
>F01_transcript_101233
ATGGCGTCGGTGCATACTACTTTGACATCATTGACCTGTAAGAATGCCATCCATTCTGCTTCCTTAAAGTTGCAAAATACTACATTCTTGCCTGGGTTTGATGTGGTTGGGCATGCTGCTACATGGAAGAAGGAAATATATCCCCCTTCCTTTTCGGGACCTAGAGCTACGTTAACCTTTGATCCTCCGTCAGCCAATAGAGAGAAGACGACTAAACAAAGTAAGCACACAGTTGATCCTGCAGCCCCTGATTTTCTTCCCCTTCCATCCTTCGAACAGTGTTTTCCGAGGAGCACTAAAGAATATAGGGAGGTTACTCATGAAGAATCTGGTCATGTGCTTAAAGTTCCATTTAGACGTGTTCATCTAGCAGGGGACGAACCACATTTTGACACCTAT…
>F01_transcript_101234
ATGATGTTCACTAGTCAAAAGGGTGCTAATGCACTTGATATTTTTAAATGGAAATCGCGTGGTGAATCATCCTTAACAATAGGATTGTTTAGTGATGTTCCTCCTGAAATCGAATTGTCCGATTACCACAGAGCACCAAGTCCTGGTAGTGAAAGCCCCTCCGGGCTTCTTAATGGCGATAGTTTGAATGTGGAACCTATTGCTGATTTGGATCTGTTCTTTGAGAGGCTGTACAGCTACTATTGTGAGAAAGGTCTCTGGTGCATTATAATAAAGTGGATAGTTGAACTCTTGAGCCTTGCTTTCACCATCTGTTTCTCAGGATTTTTCTTATTATATGTTGATTGGAATGGTCTTCGTAATGCAAAGTGCGGTATGGATGCAGTTGAATCTGGAATT…
>F01_transcript_101239
ATGAGACAGATCCCAGATGTATTCCCTGTTCTATCTGCTGCTCATAAGACGCTTGTAGCTAAATCGCGTGAGTCACTGGCAACACGCACTTTACATTCTGAGCTTGTTTTTAATTACTCAGGCTCTAAACATATCTCAGAATCCTTCAAAAGATGTGGCATCTCTGAAAACTCAACGTATGTCCTCGTAGCTCGTTTCAGTGCATCTGACGATGAGGTGAGTCAGTTAAGTCATAAATAA
>F01_transcript_10124
ATGGCTCGTCAAGGTCTGTTTTCACCTTTCCTTACCTCTCCATCCCTCCATCCCTCTCTTCTTTCATCATTAAAATCCCCTACCACAAATGGTACTACTAAATCCAGTGCTACTCCCACAACAACGACAATTGACCATGATCAAGAAATTAACCGACGATCCGCAAACTATCCACCAAGTTCTTGGGACTATAATTTTGTCAAGTCACTCACCAGTGATTACACTGAAGAGAAATATGGAAACCAGGTGGATGAGTTGAAGGAGTACGTTAAGAATCTGATTAATGGGGATACGGGTGTCCCATTTGCAAAGCTGGAGTTGATTGATTCAGTTCAAAGGCTAGGGCTGAAGTATCATTTCGAGAAGGAGATAAAAAAAGCGTTTGATACTATTTATAGT…
>F01_transcript_101241
ATGAAGGTCGTAAATGTTGGTCCTGTTGATAATCTACCTAGGTTTCATGGTTTGACAAAATTGGAACTTTTTGTTGGTCCTTCTATGTGGAATCTCTTGCTACACTTCCTTAAAAGTGCACCCAACTTGGAAATCCTTGTTTTAAACATGGGAAATATGGAAGAAGGAAGAAGGAAGAAGAGAACTGCAACCTGCTGCAGACTTGTTCAATGTTGCATCTCAAAGAGGTTGAAATTAGTGGACCTGAGAAGATAA
>F01_transcript_101242
ATGAACGAGGGAGACGACATTGATCTTTCATACAATGATTTTACACCTAGAAGCTCAGGGAGCTGTCAACAAGAGAGGGTAAACTTGTTTGGAAGCTCTTCAAAGAGCAATCTGTCTGGAACGGTTTCGTGCTTGAGCACTCCTTGTTTAAAACTTGGGCACTCTTTCTATATAAACTGTGGAGGTAGGAAATTAGAGGCTGATGGACATACATATGAAGATGATACAGATCAAGGAAAACCTGCAAAGTTCTTTCAACCTAATGAGACCAAATGGGCATTTAGTAGCACAGGCCACTTCTTGGATGATCAGAAGTCTGATGACTCTCATATTCATCCGATAGATTCAGGGGGGTCCGATAAGAGCTTGTGGACGGATGCACGACTTTCTCCCCTATCC…
>F01_transcript_101245
ATGCTTAGCAGAATTTCCAAGCGCTGCTTGTGCACTACTACTCCTCAGCCATGGCTCTTTGTAGGCTTAGGCAACCCTGGGGATAAATACAAAACAACCAGACACAATGTAGGGTTTAAAATGATTGATGCATTTGCTGAATCACAAGGAATTCCGGTGGACACAGTTCATTGCAAAGCTCTATTTGGGAAAGGTTTTGTAGATGGTGTTCCTGTTTTCCTTGCAAAACCCCAAACTTATATGAATTTGAGTGGCGAATCTAGTGGCCCTCTTGCTGCTTACTATAAGCTCCCTCTTAACCGTGTGGTTGTGGTATACTCTATTTCAGAGTTTCATGATGACATGGATTTACCATGTGGAGTTCTTCGCCTTCACCACAAGGGGGGTCATGGAAGCCAT…
>F01_transcript_101246
ATGGAGGAAGAATACATTGAAAATCTTTGCGTTCAGATACTAAAGTTCAAACCTGACTTGGTGATAACTGAAAAAGGGCTCAGTGATCTGGCCTGCCATTACTTTAGTAAAGCTGGTGTCAGTGCTATAAGGAGATTGAGGAAAACAGACAACAATAGAATTGCCAAAGCATGTGGAGCTGTCATTGTAAACAGAGCAGATGAACTTCAAGAATCAGATGTAGGTACTGGGGCTAGACTTTTTGAGGTTAAAAAAATTGGAGATGAGTTCTTTGCATATATTGTTGAGTGCAAAGATCCTAAAGCGTGCACCGTCCTTTTGCGTGGTGCTAGCAAGGATCTTTTAAATGAAGTGGAGCGAAATTTGCAGGATGCTATGTCTGTGGCTAGGAACATCATA…
>F01_transcript_101252
ATGGAAGGTGAGCATATTGGACCTTTTAACTTGGGTAATCCAGAGGAATTCACCATGTTAGAGCTTGCGCAGGTTGTCAAAGAAACAATTGATTCAAGTGCGATAATAAAATATAGAGAGAACACTGCTGATGATCCTCACAAGAGGAAACCAGATATTAGCAAAGCAAAAGATCTGCTAAACTGGGAGCCAGAAGCGGCAGAACATGCATTATCCCTTGATGGCACCTCCTTTATTGTGATCCCAGGTAATGAGACTCGAGTAATGAAAAAGCTGAACCGCATATCAAAGATTGGATCGACTATAGTGATGGGTAAGAATGAGCAGCTGCACACTTCTGGTCATGCTCATCGTGCAGAACTGGTAAGATTCATATCGGCATTCATCTAA
>F01_transcript_101255
ATGGCAGATTGGGGTCCAGTGCTAATAGCGGTGGTGCTGTTCGTGCTATTGTCGCCGGGGCTGTTGTTTCAGTTGCCGGGGAGGGGAAGAGTGGTGGAGTTTGGGAATATGCACACCAGTGGCCTCTCCATCCTTGTTCACACCATCATCTATTTTGGACTCATCACCATCCTCCTCATTGCAGTCGGCGTTCACATCCACACCGGCTAG
>F01_transcript_101256
ATGCAAATGGTTTCTGTCAGCTCATGCTTGAGGCTCTTACCCAGCAGGGACAACTCTGAACTACTTCAAGCAGAGCTTAAGAGGACACGAATTAACACAACATGCTTTATAGAGTCATTTCCATTAGACATGGTCCCAGAATCTGCCAAAGCTTCTATTAGAGGATTAATGGATTCTCCCAGCAGAAATGGAAAACCAAAATTATGA
>F01_transcript_101257
ATGGCTCCAAATATATCTACCAGAAAATCCATTGAGCTGACTAGATTTGACGAGCTAGTACTGATGAAGAAGAAATTAAGAAAACAAATCAAACCATCCAAGCCTACATCAACCACCACTAGCGATGCCTCTACCAAGAAAGACACTCCCCAAGACTCTAACATTTCCATTTTCGAAGAAACTTCCTCAAAACTTTTAACAAAAGAAACACCAGTTGAACCTCCTCTGAAGAAGGCCTGA
>F01_transcript_101258
ATGATCACACGATTTCTTCAGCATGAGCATCATCATGGGTGGCCTATTAACCAAAATTATGGAAGCCTTCTAATGGATTTTCTTTATTTTTTTGGGAATGTCTTTGATCCACGCCAAATGCGTATTTCAGTACAGGGAAGTGGGGTGTACATAAATAGGGAAAAAGGATATAGCATTGATCCAATATATATTGATGATCCTGTTTTCCCGGCAAATAACGTGGGGAGGAATTGCTTTCGGATACATCAATGTGTCAAGGCGTTTGCAGATGCCTATTCAGTTATGGAGAATGAGCTGATTTCCTTTCCCAATGATGGCGACTCAAGCATCCACTCTGCATGTAATCTACTCCCAAAAATTATCCCAAGCATTGGCCTTTTATAG
>F01_transcript_101259
ATGCAGGGGCCGCCTCCACATAGTGGTTATGATTACTATGGTAGGCAAGGTGGCCATGCCGCTGATGCTTCTAATCATATTCATGCTCCAGGTCCTTCACCTGCAATGGGTCCACCCCCTTCGCAGGCAAATTATAATTATGGGCAGCCACAAGGTCTGGATTATGGACAGCCAGCTCCTTATTCCCAGGCTGCTCCTCCACCTGCTCAGAGCTATGGTCATGGGTACAATGAAACAAAATATGAAAACCAGGTTGCCATACATAATCCATATGGAGGGAATGGTGCTGTTCAGCAGTCTGCTTACCCTCAAGGTACTACTCAACCAGGCAATGGTCTGCAGGAGCATTATGGAAAACCGCCATCATATGGCATGCCACCACAAGGACCCCATGCCCAA…
>F01_transcript_101260
ATGGAAGCAAAAGAGGCAGCAGGTTCTTCACTAGATTCATTAATGTCCTCCTTCAACACCCGCATAGCAGAGCTCCAAGAACTCGTCATAGCTCGCAACATGTACCCAGCCAGCAGTATTACCGATCTGTCGGCCGTTGACGCCGTATTGAAGGCTACGGAGCTTCAGGTTCAGCAAATCAAAGATCGGTTGCGCGAAGAGACCGAAGCCATCCCCAAAGCCAAAAAACTGATTGATGCATCACTACGGCAACAAAAGAAATTACAGAATATGTCTGCTTATGTGCCATTACATTTACCAGAAAGAGTTTCAACTATAAATCAGGACAACACTAAATGTCTGCTGCCTGAAGCTTCCAAACAGGATCTTGCTTTTAGCTCAATGAAACTTGAGGAGCCT…
>F01_transcript_101262
ATGGGTTCTTCAAGGAATGATGTGTACCAACCTTTACTACAAAACGATCAAGCATCTATATCACCACAATTATCAGAAAAACATGAAGAATCCAGCGGCGAGCTCGAAAACGTATTGTCAGATGCAAGCTTTTCGCCTTTGCAGCGTTACCGTTTGGCGGCATGGATTGAAATGAAGCTCTTATTCTACCTTGATGCACCTGCCGTCGCAGTTTACATGATAAACTACTTGATGTCCATGTCCACACAAATATTTTCCGGCCACCTAGGAAACCTTGAGCTTGCAGCAGCCTCCCTGGGCAACACCGGTATCCAAGTCTTCGCTTATGGTCTCATGTTGGGCATGGGAAGCGCGGTTGAAACACTATGTGGGCAAGCATATGGAGCACAGAAATATGAA…
>F01_transcript_101263
ATGTCTAATGACATACAACCTCGTGTTATCATAAGACATGGTTGTGCTCATCCACTTGCTGAGTATATTTACAAGCACTACCTATATAATCTTGGTGTTTGTTTGGAGTATAATACCCAATTAGAGACAGTGGAGATAATGATATGTCAAGAGAAGACTCACCATTGGGAAGAATATGATAGTAATCTTCTCGTTTTTCTTTGGGGTTTATTGGGTCAACCAAGGATAATTCTGTGGCCATATGATATCTACCATAACCTAAAAGCATGGCCTCCCATGTATGAAGGTTTCCTTGAGCACTTCCCAAAGATTCTAATTTCTAAAACAGTTTTTGACTGTACCTTTATGTAA
>F01_transcript_101264
ATGGCGTCTGAGTTGATCTACAGGGGCCACGAGTCCCAACCTGCCAATGACGAGTATTCACCCAAGCCTAACAAGCCATGGCTCTCCGTCATTCGTCCTATTCGCTACATGCTCCGCGAGCAACGCCTCATTTTCGTCTTCGTCGGCATTGCTATCGCCACCCTCTTCTTCGCCATCCTTCCCTCTTCTTCTATCACCACCACCACTTATGCCTCCGGCCGCCGCGGCCCAATCTCCATCTCCGACCCCCACTTCTCCTCGACCCAGCAGCCCCACTGGGCCGCCTACCAGAACCGTGCGGTTAGATTTGGGTCATTCAATACGGGTGGGAAGATTCCGTTGGGTCTGAAAAGGAAGGGATTGAGGATCGTGGTTACGGGTGGGGCCGGGTTTGTTGGT…
>F01_transcript_101268
ATGGCGAAGGCGATGGTAGAGCTGTGGCCAAGCAGCAGCATTGTATCAGCTGCTGCTGTTTTTCTCTTCATCCTTATGCTGCTTCTTATCATTCTTCTCATCATCTTCGCCTGCAAGCCATGGCGCTTCTTCTCTCGCCCCATCCGCGCCTCCCGCACGGTCAAGGTCTATTTTCTCTATCTCTCTGTATATCATATCATCTACACACTTATGAAATGGTATGTAATGGGTACCTATGCATCTGTTCTTAATTTTTGA
>F01_transcript_101274
ATGCTTCATCTATTCAACACCCAGCCTGATATGAAGGTTATATACATAGCACCTCTAAAGGCTATTGTTCGAGAAAGAATGAATGATTGGAGGAAGCGTCTTGTTTCTCAACTTGGGAAAAAGATGGTTGAAATGACTGGGGATTACACACCAGATATGGTGGCTCTCATGTCAGCAGATATCATAATATCTACTCCTGAGAAGTGGGATGGTATTAGTCGTAACTGGCAAAGTAGAGGCTATGTCACGAAGGTTGGACTTGTGATTTTGGATGAAATTCACTTGCTGGGAGCTGATCGTGGACCCATACTTGAGGTTATTGTCTCTAGGATGAGATACATATCTTCTCAAACAGAGCGTTCAGTTCGGTTTGTAGGCCTTTCAACAGCATTAGCAAAT…
>F01_transcript_101275
ATGAACTATATGAATTTTGTTCAGAAACATATTGACACAAATGCAGATATTACTGTATCATGTATACCCATGGATGATAGTCGAGCTTCAGACTATGGTTTGATGAAGATCGATGAGACAAGACGTATCATCCACTTTACTGAGAAACCAAAGGGCAATGCCCTGAAAGCAATGCAAGTAGACACCTCTCTTCTTGGACTGTCTCAACAAGATGCCTTAAGAAATCCTTATATTGCCTCAATGGGTGTTTATGTCTTTAGAACTGATGTCCTTCTAAAGCTTCTAAGGTGGAAGTATCCTTTATGCAATGACTTTGGATCTGAAATCATTCCTTCCGCGGTTAGAGATTACAATGTCCAAGCATGCTTATTCAGTGACTATTGGGAGGACATTGGAACA…
>F01_transcript_101277
ATGGAGACTGATGCTTCTGCTTATTTAAATAATGCTACAGACGACGTAGTGAATTGGTGGATATGGGGTTACTATAGTTCACCAATGATGTATGGGATTAATGCAATTGCTGTGAATGAATTTCTTGGGCATCAATGGAGTAAATTAACTTCCAATGGAACCGAGACAATAGGAGTTGCAGTGTTAAAGACTCGAGGGTTCTTCCCATATTCATACTGGTACTGGATAGGGACAGGGGCGTTGGTTGGATTCGTTTTGTTACTCAATTTGGGATACACAGTGGCACTTGCTTATGTTAAGCCTCTGGGGAAGCCTCAAGCTGTTATCCCAGAAGAAAATGACACTGAAGGAACTGGAGAAGCTACTGAGTTATCATCCATGACAGAATCAAATGCTGAC…
>F01_transcript_101280
ATGGATGAGGACATATCTCGATTAAAAACTACAGCTGTTAGCTTACTCAGCGACTTGGGTTGCAATGCCTCAACTTTGACAGAGGACCTTATCAATGAGATGTGCAGATATGGTGATGCAGAGCTCCACGCTGTTGCTGCCTTCATTGGTGGAATTTCATCACAGGAAGTAATTAAGTTTTTTGCATGCACCTAG
>F01_transcript_101284
ATGTTTGAGGAGAGTGTTTGCCTCCTCCTTAGAGCTTCGTGGTTTATGCCTTTGGTTGTGGAGTGTCGTGACGAGGTGGATGATGAAGTAGAAGATTACTATTATAATTATGAGGACGACGACGACGACGATCTGGATGAAGTTTACTTGGATAGGTCATCAAGTCTCCGCATTGGCAACCGGAGATGGGGTGATAATGGATATGTTCGGGCAGGAAGGCAAGAAGCAAGACCATTTTATCGACCGAATGCTCAGGATTCTGGCGCTGGTTCGTCTCATGAGCCTAGGAAGAAAGAGGCTATGAAAGATACAGCTGCAGTGGGGCGGCGGGCGAAAAGGGCACTGAAGCGTGAAGCTGCAGACAAGGCAGCTGCTGCAAAACATCAGGAGCACTTGGCA…
>F01_transcript_101286
ATGGGCAGTGTGGTGTATAATGCAGGTTTATCGTCGTCCAGTTCGAGGTTAAATTCCCGGAGTTTTCGGATTTTGAATTCTGGTGGATTAAGATGGCGAGTGTTGGAACAAGTGGATAATGAACTAAGCAAGGGCAATGATAGGGCTGCATTGTTACTAGTCAAGAATTTGCAGGGGAAGCCTGATGGTCTACGATGTTTTGGGGGTGCCCGCCAGGTTGTCGCATATCAAATCACAACAAGAAGCAAACAAGATCAAGTCAAAATGATAATTTTACTATAA
>F01_transcript_101287
ATGTCAGACACAAACAATGTGGATGCCAAGGGACTAGATCTTGTTGATAATGCTTCAAAAGTTCAAGAAGAAGATAACCCTTCAGTGGAAGATCCAAAACATTCAGACTTAAATGAAGAAAATCCTATGCCCTCCCCCCAGCAGGAGGAAGCTGCAATCAAGAAAAAGTATGGAGGCTTATCACCAAAGAAAAATCCATTAATATCTAAGGACCATGAACGTGCTTTCTTTGACTCTGCTGATTGGGCATTAGGAAAGCAAGGAACACATAAGAGCAAAGGACCTTTAGAGGCACTTCGCCCAAAACTGCAGCCTACACCTCACCAGCAAGCTCGCGCAAGACGCTCAGCATATGCTCCTGCTGATGAAGGTGAAGGTGAAGGTGAAGGTATAGTAGAT…
>F01_transcript_101288
ATGTCTCAGCAACCTACTTCCGATCAAAGTTATTTCACATCTAATTGCACCTTGCACTCAACTCAACATTCGCACCCTGCACGTTCCACCCAATCCAGTGCTTCTAATCATCCCAAATATTGTTATTGTGGAAAATTAGATCAATTGAAGACCGCTTGGACTGTACGAAATTTGGGGCGCCAATTTTATGGATGTGCTTATTGGAGCCCGCTATCTGTATGA
>F01_transcript_101289
ATGATATTGGTGAAGCAATTACACCAAAAAATCAGCCGTCCTGTAAATATAAGCCATAATACGAACAGAGAGAAGCATCATTTGACTACTGCAATTTCCACAAGAGAAAGTAAAGACATGACTGAGTTCTCAAGTACCGCTACAAAGTGA
>F01_transcript_101293
ATGCTGCCAAAAAATGTTACCGAGGTTGAAGTATCTGAGTTGTTCTCTCAATTTGGGGATATAAAAGACTTGCAAATTTTGAGAGGTTCTCAGCAAACAAGCAAAGGCTGTGCTTTTCTGAAATATGAGACAAAAGAACAGGCTCTTGCTGCCATAGAGTTCCTTAATGGGAAGCACAAAATGGAGGGCTCAACTGTTCGGTTGGTTGTCAAGTGGGCGGACACTGAGAAGGAGAGGCAAGCTCGGAGGGATCAGAAATCTCAAACACAGGCTCCCAATATTGCAAATGCCGACTTCCCACAACACTCAACATTGTTTGGAGCGTTGCCTATGGCCTACATGTCCCCATATAATGGATATGGGTATCAGGCTCCTGGAACTTATGGTCTCATGCAGTAT…
>F01_transcript_101294
ATGAGAAAATATCTAGCAAGTCCTCTAGTTTCAAGAAGAGGTAGAGAAAGTCAAGTTTCGATATTGATTCTGAATCTGCCATGGAGAATGCTACTATTCTCGCTGTACAATCAATTTGCTAACTTTCTTGAATGGGAGGCTTCATTAAATGAGCAACGCAAGAATCTCACAAATGTGTCCGGTCTAACTGATAGTTAG
>F01_transcript_101296
ATGGAAAAAACGGATGCATATAGAAAGAGTTCAGGGGCAAGCAAGAAATGGGATGGAGGGGGTCCCGGCGGTCCATATGGTGGTGGTCCACGTGGTCCACCTCGTGGACTGGACAATGTTAGGGGGATTGATCATAGCTCTCTTCCTGCATGTGGCTCCTGCTGCGGTTAA
>F01_transcript_101297
ATGGCAAAGCCTGCTTATGCTGATGATGGAGAGCTTTTAGATGGTGGGTTTGATATGAGTACCGGTGGAGTTTGTGGATATTTACATGACATAATCTACATTACATGCTTCGTTCAACTCACATCTATCATCTCTGAAAAGTTTTGGTACATATATTTAGTGATACCAGCATTTGCCAGCATACCAACTCTTTGGTCTTGTAAAGGGATTTTTGCCGCAAGGTTCAGAGGGAGCTGA
>F01_transcript_101298
ATGGGGTTGAGGTTGGGAATCAGACCACCACAAAAGGCTGCTGGTATTGGTGTCTCCGTCCGATGGGTCTCCGCCTTGTGCATTATTAGCTTCTGTTTTGGAGTTTTTGTCGTCAACAGGTTTTGGATTATGCCAGACCCAATCAAAATTGATGTGAACACGTTAAATGTGGCAAACCATAATTCTGGAGAACTTCACCCTGCTTTTAAGTGTGAGAAGAAGGAGGTTTCTGTTGAAGCTGGAGATATTCTTTCTCAAGTCTCGCAAACACATGATGTGATAATGACTTTAGACAAAGCCATCTCATCACTTGAAATGCAGCTTGCATCAGCTAGATCTGCCAAAGCTGTCAATAAGGAAGGATCTACAGTAGTTAAAAAACCTGGTAACGACCAGTTT…
>F01_transcript_10130
ATGGCCACCTCTTTTCTCTTCATCTTCACAATCATCCTCGCCACCATCTCTATAGCCCAGGCTCAAACCGTTGCTCCTCCGCCGGCCGCCGATACCTGCAATGGCATATTCTTATCATACACCCACACTACCACTACCAAGATCCCTCCTGACTTCAAGACTGACCCGGCCCAGCAGGCCTACAGGTTTGAATCCACCCTCTCCATACTCAATAACGGCTTGGAAGAAATCAAGTCTTGGCAAATTTTCGTGGGATTCCGCCACAACGAGCTATTGGTGTCTGCCTCGAATGCCGTGCTCGTCGACGGGACTATTCTTCCGGGATTGGTCGGGAACGGAACTGTTTTTGCTGGGTACCCGAATACTGATCTGAAAACTGCTATTGAGACTGCGGGGGAT…
>F01_transcript_101300
ATGGACGAAGAAATGGAGGATATGGTAATGCTTACGTTCACGGCTGTAGAAATCGATCCTGATTACGAGTTCGACGCGGCTCAATACTTTGATTTCAGTCGTGAGGAGTCGTTGGCTGAGGCTCGTGAAGCTGAGCTGTGGTTCGAATCCGCTGGAACTTATCCACCTTCCCCTTTGGTTAAAAAGTTACTTTTGAGAAAGGATATTCTAATGGAAAATGTCACAACCTCTCCGAAAAATAAAAAGTTGGAAAGCATGGCCGTGCCTGAAAATATTGGGATGGACCAAGAAATTTCTGCAATGGACATGAGTAACAGAGGTTTGACATTTTATAATCATACGATTGAGCCAAAAGCTAAACGAAATACCACTGCTAAACCATCTGTCCCAAGGACCTCA…
>F01_transcript_101301
ATGTGCAACCAAGCCTTAGCTCATGAAGAAAGCCGAAGAAAAATTTTAGAAGTTGAGGTGTCTGAGCTCAAATTTCATTTTGAAAATGTTTTTGAAAATTCTCATGAAACAAACTCAAAGACTGAGCACTTGACCCTGACAGGGGATGACGAAATTAGAAATATAAGAAATTTGCTGGGAACAAAAGAGACCCTCTCCAAAGAAATGGAACACATAATTGCACATCTTGAGCAAGAGAAACAAGGACTGAATGTATCTCTCAAGGAGTCTCAAATCACTAATGCTGGAATGACCTCTTCATTGAAGAAACTCGAAAACAAGATTCAGGATTTACAGTAG
>F01_transcript_101302
ATGGCTGGGCCGTCATGGTTGGTGGACGGTCATAGAATTGCAACAAAAATCAAGAGTGCTTCTGGCGCATGTGATCCTGGAAGAGTCAGTTGGAAAAGCAACCCTACTAAAGCTTGTCCAAATTGCCAACACGTTGTCGACAATAGTGATGTCACGCAGCAGTGGCCTGGATTACCCAGAGGGGTAAAATTTGATCCATCTGATCAAGAGATCATTTGGCATCTACTTGCAAAAGCTGGTGCTGAGAATTTTAAGCCCCATCCTTTTATTAAGGAGTTTATCCCAACTGTTGATGAAGATGATGGAATATGTTATACACATCCTCAGAATTTACCTGGTGTTAAGCAAGATGGAAGTGTATCTCACTTCTTCCACAGAGCAATCAAAGCCTATAACACT…
>F01_transcript_101303
ATGCGAATCATACTGTTTCCTGTAGTACTAGCAGTACTAGTGGCCTTATTTCTGATATATGGATTCAAGAAGATAAACCAGGATAGAGAAGGAAGCTTGGAGTTCAATTCAGAAAGAGTTGGCATAAACAGAAATGACAGGGAAGATTTAGAGTTACCATTATTCGACTTCAAAACAATTGCAAATGCCACAGGTTAA
>F01_transcript_10131
ATGTCAAGTTGCGCTAGGGTTTTTCCAACCTTCGATTGCCGATCGGACCCCGAATATTCCAGCAACTACCGATCAGAACATTCAAACTACGCCCGATTCACCACCGGAAAATCCCAGCTTCGTAAACCAACCTCCGCATCGTTCAGTGGTGGCCTCTCGTCTCTGATCCTCAAGTTCCCTCCCAACTTTGTGCGACAGCTCAGCATCAAAGCTCGGAGGAACTGCAGTAATATCGGTGTCGCTCAGGTCGTAGCAGCCTCGTGGTCCACCAATCCGTCGGAATCTGTACCTCCTCCGGCCGCCTCCGCCGTTGATTTTACTCCGACAGAGGAGCCAACGGTAATTAATGGTGACGGTTCTTCTAACATGAATGATGTACAAATTCCGACTCTAACCAAT…
>F01_transcript_101310
ATGGCGTCTTCAATTGTGGCCAAGGCGGCAGAGAAGACCGGTCCGGCCCTCCGCCGCCAAGCCCTAACAATAACGGATGCCGCCGCCGCTAGGATAAGCCAACTCCTCCAGCTTCGCCAGCGCCCCTTTCTCAAGCTTGGCGTAAAGGCTCGCGGCTGCAACGGCTTATCCTACACCCTTAATTACGCCGATGAAAAAGGGGAATATGATGAGTTGGTCGAGGAAAAGGGTGTGAAGATAATTATTGATCCAAAAGCTCTCATGCATGTCATTGGAACAAAGATGGATTTTGTAGACGACAAACTAAGGTACAAATGA
>F01_transcript_101312
ATGGCCTTCCGTTCAATTTTTTCCAAAGCGCGAGTAAAGACGACCAACACTCGAATAATCACCGCCATGGATGACGACGACGCCGTATTCGAAGACGCCGGTTCTGGAACGCCTTTATCGGCGATCGCGAATTCGTTCGAGGAGCTATCCGCGATTGTTATATCGAGTGGAGATTCCGATTACGATCTCCGGTTGAAGCCATTCTGTGATGCTTGTTCTCTTGTCTCCATACTCTTCGGTTGCCTCGGCATCGCTTTTAAATTCGCCGAGATGGAATACACCAGCAAGGTGCTTGATCTTACAGAAGCAGCACAGAGCTACGGGACTTTAAATAGTATACTTGATATTGATTTGAGAAATGACACAGTGAGAACACCAGGAAGCCTGTCACGTAATCTA…
>F01_transcript_101314
ATGGCTGTACGAGTGCAAGACTTCCCAAGAATTTTTTTTGTCAAAGTTCTATCCAGCCAATGCCCCATTTTCCTTCTACCACCACAGCATGGTGGAATTTTCAGGAACAACAGTTTCCTCAGCCTTTATCCAAAAGTTTTAAGCTTGAAAATGGGATCTTCTCCTCAAGCCTGTCAGGAGGGGAAGCATGCAGGTCATCAACCACAAGGCCAGGACTCATCCTCAACTCAGTTGACTGATCAACCTCACCAAGAAGTGGCTGCTGTAGGAGGGAACAATTATCAAGATCAATGCATTTCTTCCGATACAGGTTGA
>F01_transcript_101317
ATGGGACCTTTTAGCTGGGTCCACCTACTGATTCCCATCTTTTGCTCTCTTTTGTTTCCTGAAACTTGGGTGGTGGGAAACCAACCTGCAAGAGTGAGTCTAAATCCAAAATCCCGGGCAAAAGAAGAGTTTAAGGCAGAAGAAATCTCTTCAGTGTTTAGTGATTGTAAAAATGTATTGGCAAAAGCAACGGGGGATTATCTTGCTGTTTAA
>F01_transcript_101321
ATGGAAACCCTTGATGATATTTCTTTTCTTCAAAATTTACAACCTATCATCCCCATCCTCTTAATTGCACCCCTACTATTTTTCTTTCTCTTATCGCGCTTTCGCCGTAAACCCTACCCACCAGGCCCAAGAGGCTGGCCGCTCATCGGCAACATGCTGCTGATGGACAACCTAACTCACCGTGGGCTGGCCAGACTAGCTAATAAATACGGTGGGATTTTTCACCTCCGCATGGGCTTCCTCCACATGGTCACCGTGTCAACACCCGACATGGCCTGCCAAGTCCTTCAACTTCAAGACAACATCTTCTCCAACCGCCCGGCCACCGTCGCTATTAGCTACCTCACTTATGACCGAGCCGACATGGCCTTCGCCAACTACGGCCCGTTTTGGCGCCAA…
>F01_transcript_101324
ATGCTTGAAGTTCAATTAGACGAAGATCTAACTCAAAATAAATTGTGTGTTCCACTTAAAGATGATGCTTTCGTGTTTTGGAGTTGTGATCCGAGGTGGAGAATCTATTGGTTGATGATTCTTGCTGCTGTTTGGGGTTTGGTAGATGGATATAAATCTGATCTGGAAATGATTTCGTCAGAATTTGGGTTCTTTGTCTTCGCGAATGGACTTTTTTTCACCTTGCTCATTAATCTGTGTGTTTCCGATCTTAGATTTCATTTATTTTATTGCTTAACGTTCAGATTTGGGATCTGTCTTTGA
>F01_transcript_101326
ATGAAAAGAAAACATCCAGACGAGGATTCAATTCATGTTTCTCAGCACTTTATGAATAATCTGGAATCCCAGTTTAGGGACAATGGATATGATAGGAATAGCCTTCCCTCTGGCTGGTTGAATTGCCCTGCTTTCGGTAATGAAATAGGCTTTATTATCCCTTCAAAAGTTCCTCTTGGCGAGTCCTTTAGTGAAAAAATTAGTCCTGGCAAAACATATACTCCAAGAGAAGTGATTCATCAACAAAGGCGCTTAGGAAGAGAGCTGGGCTTAGTGATTGATCTAACAAATACCAACCGTTACTATCAAGAATCAGATTGGACGGAAGCAGGTATCGGATATGTTAAGATTAGATGCCAGGGAAGGGATGCTGTGCCTGACAGTGATTCTGTTGATAAA…
>F01_transcript_10133
ATGAACAGGAAAAGGTACAAGGAAGTGTTACGAGTTTGTTTCCTTGAAAAGGATATGGAAATTATGGAGCACAATGACCAGACAGAGATTGGAGAGCGTGGAATCAACCTCAGTGGTGGTCAGAAGCAACGGATACAACTTGCTAGAGCTGTATATCAGGACTGTGATTTCTATCTTCTTGATGATGTGTTCAGTGCTGTTGATGCTGAAACTGGATCAGAAATTTTCAAGGAATGTGTGAGGGGAGCTCTTAAAGATAAAACTGTCTTACTTGTTACACACCAAGTTGACTTTTTGCATAATGCTGATCTAATAATGATTAAGCTTGCTGACAAACAAGCAGCCTTGGAAAGGTTACTATGGGAAGCCATGACTTCCAGTACACAAGTGGAGAAGCTT…
>F01_transcript_101330
ATGCTAAGTTTAGTAAATAACTATGAGAGCTTTGGGGGTAAGAAGCAGTATGTGGATTGGGCAAGAATCCAGGGACAGTATTTGACATCTAATGATGATTTCTTTAGAAACCTTGTTGTTAAGGGATATTACAAGAACCATATAAAGATATAA
>F01_transcript_101331
ATGCATTTTTACTTATTGAACAGGTGTGATGTTTATAGTTTTGGTGTCATACTGTGGGAGCTTGCAACTCTGAGATTGCCTTGGAATGGAATGAATCCAATGCAAGTCGTGGGAGCAGTAGGTTTCCAAAATCGTCGCCTTGACATCCCCAATAATCTTGATCCATTGGTTGCAAGGATAATTTAG
>F01_transcript_101332
ATGTATTTGACTGATCTGCGAGCTTTAGAGGGAAGTTCTCACATGCACCACAACCTGTTTTATGATCCATCAAAACATGAAGGTCCAATCTTACCACCAGCAGCAGCTTTAGCACCAACTATTTGGCCCCAGTTTCATCTTCGATGGGCTTGCCCCTCTGAAGCCCAAGGTGGAGAGGTTGAAGCTCATTGTAGGACCATGGCTAAAAAGTTCTCTGAACTACAGAAGGCAAAAGAAGTGGCAGAAAGGAAAGCGAAAGAAATGAACTTTACTCTGGAGTCTTTGACTGCTGAGTTGCGAAATGAGAAACATATTAGCAGCTCGGCTCTGAACTTGGCCAAGAGATCTAGCAAGGAAAATGCAGCCATAAAGAGAGCAGTACAGTCACTGGGGTGTAAA…
>F01_transcript_101339
ATGGGAGGTACTATGCGTCTTGGATCAAGGAGAACATACTTTCAGGTTAAAGACTGCAAATCTGCAAAACTATATGGCAACAGGAGCTTCATTGATGAGAGACATCGGCACAGATATGAGGTAAATCCTGATATGGTAGCACAACTTGAAAAGGCAGGCCTTTCTTTTACTGGAAAAGACGAAAGTGGTCAGCGCATGGAGATTGTTGAGTTACCTACTCATCAATACTATGTGGGTGTCCAATTCCATCCCGAGTTCAAATCAAGGCCAGGAAAACCTTCTGCTCTTTTCTTAGGGCTCATAGCAGCAGCATGTGGACAACTAGATCCTCTCCTAAATAAGGGTGTGACAAAAACAAGCGAAGTAAGCAATGGGAATGGTAGCTCCATAATAGCACCC…
>F01_transcript_101341
ATGTATATTCTTTGCTTTCATATGAGATCAATGATGGGCATTCCTCGTCTTAAATCACAGCTCTTTCGTTTGCCTATAGAGGCAATTTTAAAGCATTCATTAAACCCTTTAAAGGTATGCTTGCCATCGATAGTACATGAATTCATGCAGCAGGCAAAAGTATCCCGGCTATTCTCTAAGAAAGGACTTAGTGAATACAAAGATGATGTCCCATGTGATAATATGTTCACCAATGACAAACTGTTTACTTCTAATGGTGTTATCTATTTACTATTTTTTGTAGCTAATTAG
>F01_transcript_101344
ATGAAAGATGATCTGAGTGGCCTTGATAAAGCAATTGGTGCTGTCTTGGGACAGCAAACTATTGAACGGAACCAGTTGTTAGTAAGCATAGCGAAGAGTAAGCTTAATAAGGCTCGTGATGACAAAAATGACAGAGTCACCAAGCCTGAAGAGCTTGTCCGGCTATATGATCTTTTATTGCAGAATACAGCTGATCTTTCTGATCTAGTTAGTTCTGGTAGAGATAGAAGACCGGAAGAAGTGGCATTTGCTAAAGAATGTGAAGTCAAAAGTTTGATTTTCAAAGCAGAAAGGTGCTTTTACTTGGCTAAATCTTACAGTTTGGCCGGAAAGAGGACCGAAGCGTATTCTTTATATTGTCGTGCTTGCGCTCGTGCTAAAAGACTTGAAAGTTTGAAC…
>F01_transcript_101345
ATGGCTAAAAACTGGCTCCCACCAGCGGAGCTCACCGGCAGCGGTCGGCCTGTACTCCACCCCGGCGAGGTCGAATGCTCTCTCCTCTCATCCGTTGAACTAGTTTGTGAGGAAAACCCCAGCTTTCCTCCCCTTAAGTCCGGACTCCTCACCCTCACCACCCACCGCCTCCTCTTCATCCCCGAAACCTCCACTTCCACCGCAATGGCTATCCCACTCACCTATGTGACCCACATCTTCTCCTCCAAGAAGTCAATCAAATCTATGTTTGCCAGCCCTAGGGTTCGGTTCCAGGTCTCAACCACTCATGACGGAAGAGTCGATGATAACGGGGCAAAGTCTACAGTGTTTACACTTGTTTTGAGGGGGAAATCGGGTCCGGACCCGGATTTGTTTGTG…
>F01_transcript_101347
ATGAATAGGTATGGACTTTTGGATGAGAGCCAGAACAAACTTGATTATGTTCTGGCTTTGACTGTGGAGAACTTCCTTGAGCGCCGTCTTCAAACACTCGTGTTCAAGACTGGCATGGCAAAGTCGATTCACCATGCTCGTGTTCTCATTAGGCAAAGGCATATCAGGGTTGGAAGGCAGGTGGTTAATGTAGCTTCATTCATGGTGAGGGTGGACTCCCAGAAGCACATTGATTTCTCTCTTACCAGTCCATTTGGAGGTGGGCGCCCTGGAAGAGTGAAGCGAAGGAACCAGAAGGCAGCTGCAAAGAAAGCAGCTGGCGGAGCTGGAGACGAGGAGGAAGAAGATTGA
>F01_transcript_101349
ATGTTAGTGTCTATGAAGGCCTTGAGAATCCAACTACTGGGAAGAAGAAGATTTGGTTTTGCAACTTTTGCCACCGGGATTGTTCATGGGCTGCAACCGGATGCGCTGATGATGGTCCTGCCTGCACTCGCTTTGCCTTCGCGTTTTGCTGGTGCTGCATTTCTGGGTATGTTTTTGGTTGGGACTGTAATTGCAATGGGAAGTTATACTGTTTTTATAGGATCTTGTAGTCAGGCACTAAAAGATAGGATCCCTAGAATAACCGAAAAGCTCACCTGGGCTTCTTCCCTTCTAGCAATTGCTTTAGGATTCGGCATTATTGTAAGTCAATTTTTCGGGTTTAGCCTGTACTGA
>F01_transcript_101350
ATGGCAAGCCTTGTTTTTGCGTTCAATACAGGAATGCTTCCAGAAATACAGGCCACAGTGAAACAGCCTGTTGTCAAGAACATGATGAAAGGTCTTTACTTTCAATTCACAATAGGCGTTTTGCCATTATATGCTGTTGCCTTCATGGGTTATTGGGCCTATGGATCCAATGCATCGCCCTATTTGCTCAATAGTGTCAGCGGTCCAGTTTGGGTGAAGACAATCGCCAATCTTTCTGCCTTCCTGCAAACTGTCATTGCTTTGCATATATTTGCCAGTCCAATGTACGAGTACTTGGATACAAAGTATGACATTAAGGGAAGTGCATTGGCTGCTCGGAACTTGTCATTCAGAATTGGGGTGAGGGGTGGTTATCTAGCATTAACCACATTTCTATCT…
>F01_transcript_101351
ATGGATGCAGGGTCAGAGTTACTCGTGCCTTGTTTTTTTTGGCAGCATGCTGCAGATGAAATAATACGACTAGAAGAGCTGCGTCAGAAGGTGCTTTCTGGAGATATGAAGATAATTACCTACCTGGATGTGGAGCAAGTGTTGGAAGACTGCTTCTACGACCTGCCTTACAATACTGGGTATCAAATTTCCGTGTTACGTTTACGGAAGACAAGGGACAAAATTATGAAGTGTACTCTCTCTATATATGTAGATATATACTTTGATTGA
>F01_transcript_101353
ATGGGAAAGTATATAAGAAAGTTTAAAGGAATCGAAGAGATTGCAGTTATGGATGTAGCACAGGTTGGTGTGAGGACGAGAGCTCGAGGTCTGGCCATGGAGGCTGCGGTGGCTGAGAGCTCGGGACCGGCGAAGAAAATAAAGGTCGGTGGTGGAGAATTGGAGTTCTCTTCGTCGTTAGTTCAGCTCAAAAGTCACCGTCAACTACCGGAGAATTCAGTTTCGGAGGGATATTCAACAGCTCCGAATAATCAGTGCTCAAGCCCTAGCTCGGATCAAGTTCCGGCGTCTTGTTGCTCAAGTAACGGATCAACTGAGGTTTCGATTGAGGAGTTGAATTTCGCAGATCTGGAGGAGGAGAGTCTAGAAAGTGAAACAGCAACCTATGCTTTCGACTGC…
>F01_transcript_101354
ATGGCATACTCTTATTATAAGAAAGAAGCATCTCCCCGAGGTCAGGGAATAGAGCTAACTGCAATTGATTCTATAGCAGCAGATCTCGCTAAGACCGGTTATGCCGCATCAAGAGCAAAGCGAGAAGAGCTGACTCGTGAACATGAACAATCGCTTATTTCACAGCTGGTTCAACTTGAGCAAGAACTGCTTCGGATCAAAGAACTATCTTCCCTTTCGACAACAGCTAAATCGCGATGCCACTTGGCTTGGGGCCGTTCCCTAAAGAATGTCTTTCCCTGGAGCCAGGTAAGTTAA
>F01_transcript_101358
ATGTCTTCGCAGTTGTCATCTCTGCTGTTTCTTGTGGTGGGAATCTCAATGGCACTCACTCCATGGTTAGCTGCCGGTGGCCAGTTCATAGCCTCTCGTTTTGAGCAGCATGACGTGCGCAGTTTATTACCTGTTGAGAGTGAGACGGATGATTTACAAGATCATATTATTATATGTGGATTTGGACGTGTCGGCCAGATCATTGCCCAGCTTCTTTCTGAACGACTTATTCCATTTGTTGCTCTTGATGTGAGGAGTGATCGAGTAGCTATTGGGCGTGCACTTGACCTTCCGGTTTACTTCGGGGATGCTGGTAGTCGAGAGGTCCTCCATAAAATTGGTGCTGAAAGAGCTTGTGCTGCAGCAATAACATTAGATACTCCTGGTGCAAATTATAGA…
>F01_transcript_101359
ATGTTTTTCTCTTTGTTCATCGGCTTATCTGCTGTTTCTTCATTTTATTTTTTTCAGTTTTTTATATTTTCTCCATTTTTTTCTCTCTTTTTTATCGAAATACTTGATTCTTCCCTTTTATTTGGTCTCGTTTGTTTTCTTCTATCGAATATTGTGATTATAGCTCTTCTTATTCTTGCTCCCTTTCCTTCTTTTTCTTTTAGCTTCTGTTCCTTTACATTTAACTAA
>F01_transcript_10136
ATGTCTTGGAAGAACAGAGGAGGAGTGGAGTCGAATTCAAAGAGTGCTGTGTCCCGGAAATTGAGTCTTATTTTATGTATTGGCTGCTTCTGTGCTGGGATGCTCTTCACCGACAGAATGTGGGCAGTGCCTGAAGCTAAAGGCATATCAAGGTCAACTGGGACTGAAGATGAAAAGCTAAAGTTAGTTGCAGAGGGTTGCAATCCAAGAGTTGACGGGGTAAAGAGGGATTCCAAAGACTTACTAGGAGAAGTTTCAAAGACACATCATGCTGTGCAGTCGCTAGATAAAACAATTTCAAATTTGGAGATGGAATTAGCTGCAGTCAGGGCTGTGCAAGATTCTATACTCAGTGGTACTCCTGTATCTGATGACTTGAGGATTAATGAATCAACAAAG…
>F01_transcript_101360
ATGGATAGCGCGTTGGCAGTGTTGAATACCATGAAGAATGAAGGGATAGTGCCCAATAATCATAGTTATAACATTTTGATAAATGGATATTGCAAGAACCTGAGAGTAGATAAAGCTATGGATCTCTTCCGAAAACTGCCGAGTGAAGGTTTGAAACCCACAATTGTAACTTGCAGCACTCTTTTGGATGGGCTATTTAAGATGGGTAGATATCTTGACGCGCGAGATTTTTTTAATGAGATGCAATCTCAAGGCCATAGACCAGATATTTTGACATGCAACATCTTGTTAGACGGCCTTTGCAAGAATCTGTGTGTGGATGAAGCATTGTCCTTGTTTCGTGCAATGGAATCTAATGGTTTAATTCCTGATATTGTTACTTATAATGTCCTCATTGAT…
>F01_transcript_101362
ATGAAGGGAATTGGAGCAACACATAACTATTATAATGTGGTGGTTGCTGCGTTTTCTGTTATTGGATTAGATATTGGAATCAGTGCTACAGCAATCAGTTCAACAATTGAGAAGCTGAAAGCTCCACCTCATCGAATGCAAATTGGTAAAGCTGTTATTGATGGTGTTATATATAATTGTTTTCTCTCTTAA
>F01_transcript_101363
ATGGGAGGGATGGGAGGAGGCGGCGGCATGAGGGGAGGTAGTTCTAGATTTTCTGGTGGATTATTTGGGGATGATATGTTTAGTTCATTTGGGGGGAATAGACCAACAAGTTCGGGTCCCCGGAAGGCTCCTCCAGTTGAGAATACCTTGCCTTGTACTCTAGAGGAACTTTACAAGGGAACTACCAAAAAGATGAAGATCTCCAGGGAAATAGCTGATGCAAGTGGAAAGACAATGCCAGTAGAGGAGATTTTAACAATTAACATAAAGCCTGGCTGGAAAAAAGGTACGAAAATCACATTCCCGGAGAAGGGCAATGAGCAACCAAATGTTATTCCAGCGGATCTTGTCTTTGTAGTTGATGAGAAACCACATAGTGTGTTCACAAGAGACGGTAAC…
>F01_transcript_101366
ATGTTGGTGGTTGACTGTTGCATGAGGCGAGACTATCTAGCCGCAATGGATCACTATATCAGAATGGCCATTGGTAATGCACCTTGGCCTATTGGTGTTACTATGGTTGGTATTCATGAACGTTCAGCTCGTGAAAAGATCTACACCAATAGTGTTGCCCATATAATGAACGATGAGACAACTCGCAAGTATTTGCAATCAGTCAAGAGATTGATGACATTCTGCCAACGGCGCTATCCAACAATGCCTTCCAAAGCTGTTGAATTCAACAGCTTGGCAAATGGCAGCGACTTACAGTCATTGTTAGCAGAGGAGAGAGATTTTGGGGGTAGTCAACCTGCCGAAAGAAGGCTTCGGCTGATGCCTGCTCCAAGTGACGGCTAG
>F01_transcript_101368
ATGACCATCCACCATATATGCTTCTTCTACATCCTTACAATTTCTACGACCTATCATGACATGGGGGATTCTCTTCTCACCTTTTCTTTTTCTCATGACCATGACCATCCACCATATATGCTTCTTCTACATCCTTACAACTTCTATGACCTATCATGA
>F01_transcript_101369
ATGGATAGTCGGACGGTTTTCTCTGATTCGAATGATATGAGTGGGAATAGCAGCAGCATATGCTGTATCGGCAGCAACAACGAATTACTGCCGCCGGAACTTTTGGCTCCTGATTTTGCTGCTATGAAGAGACTCTCGGAAAACTTGGAATCAGTATTCGTTTCCTCGTCGCCTGACTTCGATTACTACGCCGACGCTAAGATCGCGACCGCCGGCGGCCGCGAATTGCCGGTTCACCGGTGCATTTTATCGGCGAGAAGTCCGTTTTTCAAGAACGCGTTCTGCAGTAATAGAGAGAGAGGCGCGAAGTTGGAATTTAAGAAATTGGCGAAAGATTATGAAGTGAGCTTCGAGGCTTTGGTGATTGTACTGGCATACGTTTATAGTGGTAAACTGAGA…
>F01_transcript_101373
ATGGAGTACCCAGAACTTGCATTGAAGAGCACAAAACGAGTCAGCTCATCAGGCTGGAACTTGACTCGCTTGGAATCCAGTACAACTGGCCAGTGGCTAAGACTGGGGGTGGTCGCTTCCATTGGCTCTGGTGATCCACCATTCTTCTCTCTTCGAGCTGACATGGATGCCCTTCCTATTCAGGAATTGATCGACTGGAGCATAAGAGGCAAGATTGATGGCAAAATGCATGCTTGTGGTCATGATGCTCACACAACAATGTTGCTTGGAGCAGCTAAGTTGCTTCAAAGCAAAAGGGCTGAATTAAAGGGCACTGTTAAACTTGTCTTCCAACCTGGAGAAGAGGGTCATGCTGGAGCTTACCATATGCTAAAAGAAGGGCTCTAG
>F01_transcript_101374
ATGTTCAACTTCCAGCAATATCGTCATATTCAAGCACCAGGCTGGACATTGGGATGGACGTGGGCAAAAAAGGAAGTGATATGGAGCATGGTGGGTGGTCAAGCCACAGAGCAAGGGGATTGTTCAAAATATAAAGGGAACATTCCCCATTGCTGTAAGAAGGATCCAACGGTTGTCGACTTATTACCCGGAACTCCGTACAACCAGCAGATCTCGAATTGCTGCAAGGGTGGAGTACTTAATTCATGGGTGCAAGATCCATCCAATGCTGCAAGCTCATTCCAGGTTAGTGTTGGTGCAGCTGGAACCACCAACAAAACAGTTAGGGTGCCTAAAAACTTCACATTGAAAGCACCAGGGCCTGGCTATACCTGTGGACCGGCCAAAATTGGGAAACCT…
>F01_transcript_101376
ATGAATTTTCTTAATTGGTATGGTCCTCATGCTCAACTAGTTGTGACCGAAGCAGAGCTCATCAAAGAAATACTGAACAATAGGGACGGTACTTATCCAAAAATAGAGCTTGAAGGCTATGCAAAGAAATTATTAGGAAATGGGCTCTCAGCAAGCACAGGAGAAAAGTGGTTTAAGATGCGGAAACTGTCCAGCCATGTTTTGCATGCAGAGAGCTTGAAAGGGTCAAAGGGCAATGCCATTGATCATAGACCCAGGGCTCTACCAAACAACAAAGTCAGATATATTTTGGGTCACACCTCGGAGAACATTGCCAACAACCTTTAA
>F01_transcript_10138
ATGGAGATTAGTTCGGCTCCGATTAGTCAGTGCTCCAAAGAGCATCAAAAGATCTATCAGGAATGGTTTAATTACGCCGATTCTGATAGCGATGGGCGCATTACGGGAGGTGATGCCATCAAATTCTTTTCCATGTCTAACTTACCCCGTCCGGATCTTAAGCAGGTGTGGGCAATTGCAGATTCCAAGCGACAAGGCTTTCTTGGTTTTAAAGAGTTCATTACTGCAATGCAGTTAGTTTCTTTAGCACAAGCTGGAAAAGCCATAACTACCGATCTCTTAAACTCTGAAGTTGACTTTGAAAATCTGAATCCTCCAATCATGGACGGATTGGATGTTTTACTAGCTAAGCAAAAGTGCACACCTAAAACAAGTGAGACTGAGACGAATGGTACTTCT…
>F01_transcript_101380
ATGGGGAATCAAGTGAGCAGGAGACAACGAGGTTGTCTCTGCCAAGGGGATGAACAAGACGGATTTGTAGCAGCGTCAACGAGAGAAGGGTTCTGTAGTTTCTCAGTTGACAATTCACTGATAAGGAATCAAGGGATGTCAATTTCTAGGTCTTGA
>F01_transcript_101384
ATGGCAACAGAAAAAGAGCAACCAACACCTGCTGCTGCGGCACCAGCCATCAGTTCATGTCGAAAGAAGAAGTCTGAAGAAGCAACTTTCTTGGAGGACGTAAAGGATCATATTGACGAGTTTATTAATGCTTCAATGGATGAACACAAGACTTGCTTTAAGAAGACCATCCAAAAGATGTTTGGAATGTCAAAAGTTGTTGCTGAAAGAAACTCTCAGTCTAAGGAAGTTGAAAGTTCTCTGCCCCTTCAAACTACCATTGCTGACTAA
>F01_transcript_101385
ATGTGGCTGCCACTGCCGCCGACCAAACTGCTACTGAACCTACCAAAAAGAGAACAGCCAGGTCAAAATTCTAAGAAATTGAAGGCCAGTGTTGAATCTGAAAGTAAAACTACCGATACTGTTCCAATAGTGATAATATCTGTAGCGCTTGCAAACTTTTTTGGTACTGATGAAAGGGAGATGTCGCAAGCAGAGGTTTTAAGACAAGTCTGGGAATACATAAAGGTCAATCAGCTTGAGGATCCTTTAAATGCGATGGTGATACAGTGTGATGCAAAGCTTCAAGAGCTCCTTGGATGTGAAAGCATTTCTGCTTTGGGAATACCTGAGATGTTGGCACGCCATCATCTATTTAACAGATCATTATAG
>F01_transcript_101386
ATGGCCACTCTCCGATTCTTTCTCCTCCTCCTCCTCCTCATCCTCACAAGTTCAATCACCCATGCCGAAATCCGAACGACCGAGATCCGATCCGATAACCGTCTCATCATTCCCTTCGATGAATTCGGATTCACCCACACCGGCCGCCTCGATCTCAATGTCTCCCGCATCTCCCTCTCAAACCCTAAGGATCCCCAAAACCCCAAACCCGACCTCTCTCAAGTCGGATTCTTCCTCTCAACCCGCGAATCTTGGCTCCACGTTCTGGAACAACTCCAGGAGGGAGAAATCCAGTGCTCCATCAATTCCCAACTCATCAAACCTGTGTTCACCTTCGATCGACTGAAAGCCTCCTCAAGCAATCGCTTTGACATCACTTTCCAGGTCGATGAAGCTAAT…
>F01_transcript_101387
ATGCAGGATGTTACAGTCATTTTCAGACGAAGGGGAGGAGATGATCTGGAACAAAGTCATACTCAATGGGCAAGAACCGTACGGTCCTCGCCCGATGTCATTGAAATGTCATTCTTCCCTATTACACGTCTTCTTGAAGGGGTGACTGGAAAGGAGCATTTGGCTCGGGCTATAGATCTCTATCTCGAGTACAAACCTCAGATCGAGGAGCTGCGATATTTCTTAGAGTTTCAGGCCCCTCGGATATGGGCTCCCATACAGGATAGGCCTCCTGGTTATCAAAGAAAGGAACCTGTCTGCCCATCTTTGCAGTTCAGCATGATGGGGCAGAAACTTTACATCAGCCAAGAGCAAGTACGTTTCTGTGTCTTTGTGAACATGTTACTGTCATGGTGA
>F01_transcript_101388
ATGAACCCAAACCCCAAATACTTCAACAATCAGCCCCTGTTAACATACCTGATTGGTCAAAGATATATGGGAAGAATCATTCAAAGAAGACCTCCAACAAATCTTCATGGCTTGATGATGACAATGATGATGATGAGGATGGATGATGAGGATGAGGATGAGGATGAGGATGCCGGCGGTGAATTTAGGGGAGAGAGTTTGGAGAGTGATGACGATGATGCCAACATGATGCCTCCGCATGAATGGATTGCCAAGAAGCTTGCAAGGACTCAGATATCTTCTTTCTCTGTTTGTGAAGGTGCTGGGAGGACTCTCAAAGGGAGGGATCTAAAAAGGGTAAGAAATGCAATCTTAAGCAAGACTGGTTTTCTTGAAGATTAA
>F01_transcript_10139
ATGCCCATTATGGAAACTGCAAATTCAAACGCTTCGCGAGCCGAAGAAATCAAAGTTTTAGCTAATGATGCCTTCAAAGCCCACAAATATTCTCAAGCTATTGACTTGTATACCAAAGCAATTGAACTAAACAGTGAAAATGCTGTATACTTTGCGAATCGTGCTTTGGCACATACTAAGCTGGAGGAGTATGGTAGCGCCATACAGGATGCATCGAAGTCGGTTGAGATTGATCCTAGATATTCAAAGGGGTATTACAGGCGGGGTGCGGCTTACCTTGCAATGGGGAAATTCAAAGAAGCATTAAAGGATTTTCAGCAGGTCAAGAAAATTTGTCCAAATGATCCTGATGCGACTAAGAAATTGAAAGAATGTGAGAAAGCTGTAATGAAGCTCAAG…
>F01_transcript_101391
ATGCAACCGTCATTTCCTTTCCACACCCAAGGCCCTGCTGTTGCTGGAAGTGCCCCACCAACAGCTGAAGATTTAGAATTAGCTATGGCTATCAATGCCTCCCTCTCCCTTCAGTCTACGCACGAAAGGCCACTGGCTCTTGGTACCCAACCCGATCCCGTATCACATGCATCCACCAGTTGGACCAACCCTACAGAGATCACCAATAACAACAGTTCTGCTGCTCTTGGAGCACCTGCTCCTTTTAAAGGAAGTAGCAGTGGATGGGAAGTCCAGGAAGTTGGTCCAAGTGGTAATCCTGCTCCGAGTGATATTCCTTCTGTTGTCCAAATGACACTTGAGAACCCCAACCCAGTCTCAGGCCCATCAGCTCCACCTATTGCAGATGCTATTTTAGAT…
>F01_transcript_101393
ATGATTTTCGTCAAGGTTGCAGGTCTTACAAAGTTCTATCTCCGGACATTTGTTTTATGTGCAGACATAGTGATGAGACGCATGCTCTTTTATTTCTGCATTATCCTGTTGTTTGGGGATTGTGGAGCTCTCTCTTTGGAGTGGGTGTCCTGCCAAAGTGCAAGATATGTTATTAATTTGTTATAG
>F01_transcript_101395
ATGGGCATTGAAGATGGTCATAACGGTGTTCCAGGATTGTCTCAACTGGATACCATCTACTCCTATATCATTGTCGTAATTAATGTATGCCCTGCCGAAATCTCATTTGCCAGCCCTGCGTTACGAGCAAAAACTTTACAATTGCATCCAATACAGATGATGTCAATTGATAACATTGTCAAGAAATCAACTTATGATGCATCCTCGGGTTACTTCAAGGTGCCTCCTAGGACTACAGCTATTTTTGTGGAGCCTCGAAACGTCTAA
>F01_transcript_101396
ATGGTGCTGAAGCTTACAGAAACCAGTGCAGATGACTATTGTGTTTCATCGAATGCATTTGAGGTGAATGAACTGGACAAAAAGGATTCTCCAATTAAACTGAGGAGGGGAAGGAGACTAAAAGATTTCCAGAAAGACATACTTCCTGGCTTGGCATCTCTTTCTCGACACGAGATTTGTGAGGATATAAATATCATGGAAGGAGTAATGAGATCTAGGGAATACAAAAGACTCAGATCAAAGGCAGCCAATGGAGGGAACAGGTTTACACCAGTGAGAAGTAGGAGGTCCAGACTCAATTATGTGGGTCGAAGATATTATTCATAG
>F01_transcript_101399
ATGGCGGAGGAGAATATCAGATCTCGAGGTGTGGTGGTTCGGTTTAACGAGCAGAAGGGTTACGGATTCATAAAACCCGACGACGGCAGCGACGATCTCTTCGTTCATCATACGAAGATCAAATCCGACGATCTCTTCTTTCTGTTGATTGATAAATCTTTCGTCTCTCAGTTCTTTTACTCTTTGATTCTAGGGTTTCACTCTTTGTTAATTTGA
>F01_transcript_1014
ATGAATTTTCTGATGCTGCGGTCTAACCAGACTGCAGCTTCGGAGCAGCCACCCACTCAGGAATTTCTGGGGCAGGCAAATCTTGCAACAAAACCTGCTACCACTTTGGAGGGACTTATAGCTGAAGATCCATTTCCAGTCACTCCCTCATCTGACAGTGATCGAGAGCGGAGTGGTAGATTTGGGAGAGGAAATGCAGGTGTTGTAGGCTCTAATGCAAATAATAATTCCTCAAATTCAGAGAATCATGCTGATGTTATTGAAGATCAAGGATGGATTACCATTCCATACAAGGAGCTTCCTGATAATTGGATTGAAGCACCAAATATACAATCATTTCACTCTTTGGATCGCTGTTTTGTTTTTCCAGGTGAGCAAGTTCATATCCTGGCATGTTTA…
>F01_transcript_10140
ATGGGTCGCTCTCGTGCAATTCCCAACGCTGCCGATGATGATCCCAGCCAAAGTCGATCGAAGAGAAAGCGGACTGCTTCAAATGTGGAGAATTTAGAGTCTGTGACTGCAGGTCAAGGGACAAATGAAGGGAAAAAGGCATTATACCACTGTAACTATTGCAACAAAGATATCTCAGGAAAGATTCGCATTAAATGTGCGGTTTGTTCTGATTTTGATCTTTGCGTGGAGTGCTTTTCAGTGGGAGCTGAGGTTTATCCTCACAAAAGCAATCATCCATATAGGGTTATGGATAATTTGTCATTTCCTCTCATATGTCCTGACTGGAATGCAGATGAAGAAATATTACTACTAGAGGGTATTGAAATGTATGGGTTGGGGAACTGGAATGAAGTTGCC…
>F01_transcript_101401
ATGAGTGCTCTCCCTAGCCTCTGTGATCAATTTGTTCAGCTTATTGAGTATTTGAAAGAAAACAAGAATGATGATAAGGATCAGGTTGTCATTGTCTTACTTAACATGCTAGAGGTGGTGACCAGAGACATAATGGTGGATGATCCAATTCCTAGATTCAAGCCATGGTGGATCATACGGAGTACACGAGGGGATGAAACCTCTTGA
>F01_transcript_101404
ATGGTTGCTTTTGGGAAAAAGTTGAAGGAAAGACAAATTCAAGAATGGCAAGGATATTACATCAATTACAAATTAATGAAGAAAAAGGTTAAACAATATGCCCACCAGATTGAAGTTGGAGCACTTGATCGTCGACATGTTCTCAAGGATTTCTCAAGAATGCTGGATAACCAGATTGAAAAGATTGTACTTTTTCTATTGGAACAACAAGGGATACTTGCAAGAAGGATCTCCGAACTCGGAGGGCAGCAGGAAGCTCTTCAGGAGCAACCAGATATATCCAAAATCTCTGAACTACGAGAAGCATATAGGGGCGTGGGGCGAGATCTTTTAAAGCTTCTCTTTTTTGTTGAGATAAATGCCATTGGTCTGCGTAAGATCCTCAAAAAGTTTGACAAA…
>F01_transcript_101408
ATGCACAAAAACATTGTACAATTACGGAGTAAGTTATTGCTGAACTACAAGCCTCCGCCTCCTCCTGTTCATACAGATGTTGTTCCAATGCGGGCAGAAGCAGATCCTATTGCTGAACTAGTTAAGAAGAAGATTGTGCGAGTACCAATAGCTAGATGTGGCCTGGCATCCAAGGGGCAAAAAATTTCACTCCAGACTAATCACTTCAAAGTGAATGTGGCCAATGTTAACGGGCACTTCTTCCATTACAGTGTAAGTTTTCACCTGACTATCAACACCTTCAGGGCTTTGACTTATCTTGTTGAGTTGTACAACTTATTGTGCTCATTCTGTTTGAGTTTGTGTATCAAAACTATGAATGTGTTGTCATAG
>F01_transcript_101409
ATGGGAAAAGGCACAAAAAAGGATAGCAGGAAACGTTCGCACACTGAGGAGGATGAGTTGGATCCCATGGATCCAAGCTCTTATTCTGATGCTCCCCGTGGTGGCTGGGTTGTAGGTCTGAAAGGAGTACAACCACGAGCAGCGGATACCACTGCTTCGGGTCCTCTCTTCCAGCAGCGCCCATACCCATCCCCTGGAGCAGTCTTACGAAAAAATGCTGAAATTGCTTCACAAAAGAAGAAACCTAACTCTAAATATGCCCCTATTTCCAAGAGAGGTGATGGGAGCGATGGACTTGGAGATGCCGACTGA
>F01_transcript_101412
ATGGCGAAAAATGGAAGAGATGATTGGAGGGAGGTGGTGAGGAAGATGCTTCCTCCTGGGGCTCCAATCCCAGAAGATGATGCTGATCTTGATTATTCAATAGCAATGGAGTATAGTGGTCCTCCGGTCTCTTATGAGCTCCCTAGAGTAGAACCCCTTGATGTGAATTCGGATTCGATTTCCATTGCATCAGTAGCAGAAGAATCCTTTTCGGAATCAAGAAGATCTGTCACTAGAGATGTTCCCCATGTCATTGAACCAATACCTTTGCCAATGTCTTATATTGCTAGTGTCACTAGTCCCCCCAATCAAAGTCCTAGGATGTCTAGCTCCGAGTCTGAGGTATCTGTCTTGCACAACCCCGAATCCTCTTCGGCTTCCCTTTCGGCCTCTCCAAGT…
>F01_transcript_101413
ATGGCGACTCGGATCCTTTCTCGATCTATTCTCACTACCAAAGAATGTCTTTCTTCCGTATTATCTCGCTCTTACGCATCCTTCTCCATCAAATCACCACCCTCCGCCCTCAACTCTCTTCCTTCTTTCTCACCACTCCGCCTCCGCCCTCTCGTTTCCGCCGCCGCCAACTTCCGACATCTATCCCCTGCGGCGGCTACCATCCGCGGTTTCGCTACCCGCCAGACGACGTCATCGCTTAACGATTCGAACCCTAACTGGTCCAATCGTCCCCCGAAGGAGACGATTTTACTCGACGGTTGCGATTTTGAGCACTGGCTTGTTGTTGTGGAGAAACCTGAGGGTGAACCCACAAGAGATGAGATTATCGATAGTTACATCAAAACCCTAGCTAAGGTT…
>F01_transcript_101416
ATGGACTGCTGGTTGCAGGGTGCTAATCTCAATGCTCAACAGCTTGCGATAGTTGCAGGGCTTTGCGAATGGAGAGATGTTGTTGCCCGTGCTGAAGATGAAAGTACTGGTTATATATTGCCCAATAAAACTCTTCTTGAAATTGCTAAGCAGATGCCTATCACCACTAGCAACTTGCATCGATTGGTAAAGTCGAAGCACCAGTATATTGATCGCAATCTTGGTTCTGTTGTTAGCATCATTAGGCATTCCATTCAAAATGCTCCTGCTTATGAAGGTATTGCTGAACATCTTAGGGAAGAGCGCATGGAAACAGTAAGTCTCACATACAAGCTAGGGTTAACGCCCCATTGGTTACTTTGA
>F01_transcript_101419
ATGATTGGTGCCTCAATGAGGAGAATTCAACAGCGCGTTCTAGGGCTAAACAAGACTGGCATTTCTATTTCATCTAGTGACATATGGCTTCTAGGTGTGTGCTACAAAATATCTCAAGAATATTCTTCTGCAGATCCAGCTCATAGCAATGGATTTGCTGCATTTGTTGAAGATTTCGAATCAAGAATTTTAATGACACATCGTAAAGGCTTTACTGCCAATGGAGATTCAAAGTATACCAGTGATGTAAACTGGGGTTGCATGCTTCGAAGCAATCAGATGCTTTTCGCTCAGGCATTGGTTTTCCATCGGCTGGGCAGATATTGGAGAAAACCTCTGCACAAGCCACTGAATCAGGAGTATGTCGAGATACTGGATTATTTTGGTGATTCTGAGGAA…
>F01_transcript_10142
ATGTCCGCCATTGCTACAGCTGCAGCTCTATCACTTCCCATCTCTTTTTACCGATCGTCGAGGTCAAATTCCAAAAGGGGTTTCAAAGGTGGGTTCAGGGTGTTTGCTATATTAGGGGAGGAAAGTGGACTGGTGGACAAGAAAAGCCCTTGGGGCACACTCTTTGATGTTGAAGAACCCAGGTCTAAAGTCCCACAGGTTAAAGGGAAGTTTTTGGATGTAAATCAAGCTCTAGAAGTGGCTAGATTCGATATACAGTACTGTGATTGGCGGGCTAGGCAGGATCTTCTTACAATCATGCTTCTTCATGAAAAGGTTGTGGATGTATTAAACCCTCTGGCCCGTGAATACAAATCCATTGGCACCATTAAGAAGGAACTTGCAGAGCTTCAAGAAGAG…
>F01_transcript_101421
ATGTACGGATGTTACACATATCACAATAAAGTAGGTGGTGATGGAATACATAACTTGGAGGGAGATGCCGAGCAAGGCACACAGGGTGCTTCTGAACCTGCAGAAAATACCAATGCAACCAATTCTGCAAAAAACTTTGGCCCTAATGAAGTAGTAGGTCGTGATCGCCAAATTGCAGGTTTTTGGGGCTATGTTTTTCAAGTCATTTTCCAGGTAAAATTCCAAAATGTTATCAAATTCAAACAATGA
>F01_transcript_101422
ATGAACAACTATCTTGGGGTTGGATGTGATGCAAAGGTTGCTCTGGAAATCCATAATCTGAGGGAAGAGAATCCAGAGAAATTCTATAATCAGTTTATGAATAAAGTTCTTTATGCAAGAGAAGGTGCTAAGACCATCATGGATAGGACATTTGCAGATTATCCTTGGCAAGTTCGAGTTGAGGTGGATGGTGTTGAGGTAGAGGTCCCTGAGGATGCAGAAGGTGTTCTCGTTGCCAATATTGGAAGCTATATGGGTGGCGTAGACTTGTGGCAAAATGAGGATGAAACCTATGATAATTTTGATCCTCAATCAATGCATGATAAGATTTTGGAGGTTGTGAGCATATCTGGAACATGGCATCTCGGAAAGCTTCAGGTTGGGCTATCTCGGGCTAGA…
>F01_transcript_101423
ATGCATGATGGATGTACATTCAATCATCTTTATGTCAAGGCAAACCCACATGAAGTTGAAAATGCAACATGGATGCTAACTATTGATAAAGCCTCCTTACTTGCTCAAGTTATGAACCACTTGGAAGAAATGAGGAGAAGTGCAGCAGAAGCTACTATATGTATTCTCATACTGATGGACATTGACGAAGTCAGAGCCGAGCAACAAGAGGATGGTTCAGATGTAGATTCTTATTCTATCAAGGCATCTCTATGTTCATCTTCTTTAGGGGATTTCTGGTGA
>F01_transcript_101424
ATGGCTGGAAGAAATCGTGGACAGCCTTTTGCAATGAAAGGTGTCCCACATGCTGGGTTGCCTTCTTCTCATGAACCTCCCTTTGGTAGAAACCTTGGCCCAATGCAGCATCCTGCATTGCTTGAAGAAATGAGAGAATCCCAATTTGGGATGGGTCCCAGACCACTCCCCCTTTATCCTGCTATCATTGAGGAGCGCCTTGCGGCTCAACATCAGGATATCCAAGGGCTTTTGGGTGATAATCAAAGGTTGGCTGCTACCCATGTAGCACTTAAGCAGGAATTAGAAGCTACTCAGCAAGAGCATCAGCGAACCAATCATTTTGCCCGTTCAGTGCACACTGAGAAGGATATGCAGATGAGAGAGCTGTATGAAAAGTCTGTTAAAATGGAAACGGAT…
>F01_transcript_101425
ATGGCGTACGTCTCTACACAGCTATCACAGGAGATGGAGAAGCATAAACTTGCAAACATTCCTGCCAGTTCATGTACTTCTGAATCAACAAGTTCCAAAGGTTATTATTCAAATCATGGTGATGCATGGGTTGAACTGTCGCAAGGATTGAGAAAGAAGAAAATGGAAGTTCGTAATAATAATGACAAGACTGGCATGTTAGTAAGGGATAGACAAGATAAGCTCAAGAATCTCCAGGACAGGAGTGAACATGGCATGTTTCTTACTTCTAACCTTGACAATATTGTCACAAGAGAAGCTTCAGAAAACTTAGTTGGTCCGGCACAAAAAAATGATTTTCAATTTTACATACTATGTTCAAGTCCACCGCAGGCCAATATATGTGTACAAACATATGAT…
>F01_transcript_101426
ATGTGGGAACTGGGCATGCGGGACATGAATAGATTTGAGTGGGCGGTAAACATTCAACGAGACTGCCATGCATCTTATGTCGGTCATTATCCCATACTGTCATATTTTGCCATTGCTGAAAATGAGTCAATTGGAAGAGAACGCTACAACTTTATGCAGAAAATGCTTTTGCCATGTGGGCTTCCACCAGAAAGAGAAGATGATTAA
>F01_transcript_101427
ATGGGTTCACATATGAAGAAATCCATATTTGACGAACAAACATCCAAAGCCCTTAAGAATTGGCACATGGCTGCTAAAATGAAAAAGGGGGGAAATGCAGGCAGATCTCCCACGCGAACTTTGGGTGATGCTAGCCCCACCCCAACTCCTTCAATGTCATCGGCTTCAGTGTCCTCGACTTGGCACTCCTCACCAGCTGCACTGCATCGCTTCAAGACAACTGGTCACTCAACCATTCCACATGATGACAAGGACATGTCTGATACGAAGCTGATCCACCCACCACCACGGCCAAGTTGA
>F01_transcript_101429
ATGCGAGAGGAATTGCTCTTCTCTTGGCAAGGTGGCCCAATCATTATGTTGCAGATTGAGAATGAGTACGGGAATATTGAAAACTCATATGGACAGAAGGGGAAGGACTATGTGAAATGGGCTGCTAAAATGGCTGTTGGACTTGGTGCTGGAGTTCCATGGATTATGTGCAACCAAGTAGATGCTCCAGAATTCATACTAGATGCCTGTAATGGATACTACTGCGATGGGTTTAGGCCAAATTCAACAAGAAACCAGTTATTTGGACAGAAAATTGGGATGGAGGGTATACAAGCTGGGGTGGTAGACTGCCGCATAGGCCTGCTGAAGATCTTGCATTTGCAGTTGCTCGCTTTTTTCAACGTGGAGGAAGCTTTCAGAATTATTATATGGCACATG…
>F01_transcript_10143
ATGGATATCAATTCTGTCATTATCGATCATGTTGGATCCAAGCAGGAATTGGGAGATTTGGGCCTTGTTGCAAATGCAAGCCGTTCCTCTCAATCTTTGATGCGTAAACCTGAAGCATTGACTGTCACCAAGGTTTTTAATACATTTCAGCTCATTGCCAAGGAATCTGGCAAGGACAGACAAGAGAAGAAAAAGAACCGTATTAAGGCACTTCTTGTTGCTGCCATTGATTGTGAACCTCAATATTTGATCCGGCTACTTCAGACAAAATTAAGGATTGGTTTGGTAGAGCAAACTCTATTAGCTGCCCTGGGGCATGCTGCTCATTATACTGAAAAACATTCCTCACCTCCTGCACGTATAGATTTTCCACTCGAAGAGGTCCTGTATCTGCTCTTG…
>F01_transcript_101430
ATGCAATTTGCTGAGGCTCTGAAAGTTGAGATCAATAGGGGGTCTGCAATTATAAAGGAAATTGCAATTGGGAGAGATCTGAAGAAGTTTCTCTGTGTGATTGCTGGGTTATGGATCTTATCAATTTTGGTATTTGTGTTGCTCCTCACGGTACCTGTGCTGTATGAAAAATATGAGGACAAAGTGGACCCATTCGCAGAGAAGGCAATTATTGAGATCAAGAAACAGTATGCAGTATTTGATGCAAAGGTTTTAAGTAAGATCCCAAGGTGGCCCCTAAAAGACAAGAAGAAGGATTAG
>F01_transcript_101432
ATGCCAATCAGTCGACAAAGATTTTCAATTAATAATAGGAACTTTGCCATTCAATCTTCTCTTCCAAATCTAGATAGAGCAGGACCATCAGATTTTCATTCACTTTCAGACTCTTGGAAATCTCGACTGAATGCTATGTCAACAAAATACATGGACTCGATTTCTAAGAGTACAAGAGTATGGAAGGAGAAGCTGTTCTCAGGTTACCTGTTTTCGAATCAACAATGGTCTGCCTATTCATTCTGCTATATTTACTTCTGGTGGAAATCATAA
>F01_transcript_101434
ATGTCCGCTACACGCCTGAGCAGGTTGAAGCACTTGAGCGCCTCTATCATGAGTGCCCCTAAGCCCAGCTCTATCCGTCGCCAACAGCTTATTAGGGAATGCCCAATTCTCTCCAACATTGAGCCCAAGCAAATTAAAGTTTGGTTTCAAAATCGAAGATGCAGAGAGAAACAGAGAAAAGAGGCTTCCCGGCTTCAAGCTGTGAATAGGAAGCTGACTGCTATGAACAAGCTTTTGATGGAGGAGAATGATAGATTGCAGAAGCAGGTGTCACACTTGGTGTATGAGAATGGTTACTTTCGTCAACATACTCAGAATAGCTCCATTCCCACCAAAGACGCCAGTTGTGAATCTGTGGTGACGAGTGGTCAACACCACTTGACGCCTCAGCATCCCCCA…
>F01_transcript_101437
ATGAGTCTTGGAAAAGTTGCTGTTTCATTCACCCATACCATCAAAGCTATGGAGCCCTTTTTCTCGGTTGTCCTATCAGCTATGTTTCTCGGGGAGATTTCAGGCGGTCATTTCCTATTCATTGAGGGTGTATCTGCAATCCGCCCATCATCATTAGCAAAGGTGAATTTAGATGATCAGAAGTCCAAGGTAGTTGACTTGCAGATTATATGGTGTTCTTCTTCGGACAGTCAGCCGTACAAATCATACTTTAGCATGCCAGAGTTCATTGAATTTCCAACAGTTATTACTGGTCAAACGACCTATGCTTACTTTTATCCACCGAGCAACCCGAAGTATCAGCTTAGCAAGGAGGAAAAGCCTCCATTACTATTACAAAGCCATGGCGATGAGATGACG…
>F01_transcript_101439
ATGCAAAATGACATCACTCACCTCTGTTTTGCGGATGACATCTTAATCTTCTGCCATGCTAGTCTTGATTCGATTAACATCGTCAAATCCTGTATTAATTCCTTCTCTCTATATTCTGGTCTTATTCCAAATGCTCATAAGAGTCGATGTTTTTTGGCTAGCACTGACCCAGTTACTTCGCAAGTTTTTCTATCTATCCTGGGATTTTTTGCAGGTTCCTTACCTATCAAATTTCTAGGTGTGCCACTAATTTCCTCCAAACAATCTTTCAAGGACTGCACCCCTCTCATACACCGAATTACTCAAAAGGTTACTTCTTGGACTGTCATTGCATTATCCTATTCTGGCCGGCTACAACTGATTAAGACTGTCCTATTTGCCATCCAATCATACTGGAGT…
>F01_transcript_10144
ATGGAGGATACTAACCAACATCATTCCTCTTCTAATGCCCACAATCACCATCAGCAACAACAACAATTGGGGTTAGGGTTTCAAGAACCTACTTTACCTCATCCTTCTGATCCAACCCTTAACTACCTAGTTTTGAAAGATTCCTTCAATGAGGAGGAGGAGGAGGAGGTATGCAGTCTCGTTTTGGCTCCAGACACGGACGAGGAGAGACAACTGAAACAGCCAATCGATGAAGAGAATCATCCACTGGAAGCGAAAGAAACTATCAATGAAGATCCGGTTATCGTACCCAACAATGCCCCAAGTGGTGAACCTCCTCATCGAGCTTTTAGTGGATTCAACAATAAAGCGCTTGAGAAGAGTCATGACACAATGAACAGTGGAGCGAATGGTGAAGGA…
>F01_transcript_101440
ATGAAAATGATGATGAAGACTTTGTCTTGCCCAATTCAAAAAGGAAGGGCTCAGTTGATGTCACTCCCAATAAAAAAATTAAAGAGTGGATTGAGTAAAGGAGTTAACAAGAAGTCCGTAGATATTGATGAAAGTGATGAAGATAATGTGGATAATACAGATACCAAGTCTCATCCAAAATCTGCTGGGAGGGGCTGTGGTGAGAGAACTTCAACACCAGCTCAGGCTAGTACAAAAAACATCGATATTGATGAAAATTATGAAGATATTGCTGATGATAAAGATACTAAGTCTCTTCAATCGAGTGGGCGGGGTCGCGGTGGAAGGGGTGCATCAGCAGCACCAGCTGGTGGAAGAGGTAGAGGTGGTGGTGGACGGGGTGGATTTATGAATTTTGGT…
>F01_transcript_101445
ATGCATTTTACGAAGCTAGATGACTCTCCCATGTTTCGGAAACAGATACAGTGCTTCGAGGAAAGTGCTGAATCCTTGAGAGAGAGAAGTTTAAGGTTTTACAAAGGATGTCGAAAATACACTGAAGGGCTTGGGGAGGGATATGATGGGGACATTGCTTTTGCCAGTGCCCTAGAAACTTTTGGTGGAGGGCATAATGATCCCATTAGTGTTGCTTTTGGAGGTCCTGTTATGACAAAATTCACTATTGCGCTGAGGGAAATTGGGACATACAAGGAAGTTCTTCGATCACAGGTTGAGCACATGCTGAATGACCGGCTACTACAATTTGTCAATATAGATTTGCATGATGTTAAGGAAGCACGGAAGCGTTTTGACAAGGCTAGCCTTCTCTATGAC…
>F01_transcript_101449
ATGATTATATGGATAGTGCTGGTGTTGCTAAGCTTCCTGTCTCAACTTATTCTCTTGTATTGGCTAGCCAATTGGGCTTCACTGCCTTTTTTGCTTGGATTTTGGTTAAGCAGAAGTTCACTTTTTTGCATATTAATTCCATATTTTTTGTTGACTGCTGGAGCTGTGGTGCTTGCGTTTCATTCTGGTTCTGATGTTCCGGCTAATGAAACCAAAAAGGACTATATCATAGGATTTTTAATGACTGTTGGAGCTGCGATTTTGTATGGGTTTGTGCTACCAGTGATAGAGCTATTGTATAAGAAAGTTAAGCAGCCCATTACTTATGCTCTGGTCATGGAGATGCAGCTGGTTATGGCCTTCTCTGCTACCGCCTTCTGCGTGATTGGAATGTTAATT…
>F01_transcript_10145
ATGGCTAGAGAACAACTGGAAGTGCTTAATGCACTTGATGTGGCCAAAACCCAATTGTATCACTTCACAGCAATAGTCATTGCTGGAATGGGATTCTTCACAGATGCATATGACTTGTTCTGCATATCTCTTGTCACTAAATTACTAGGCCGCATATACTACCACGAAGATGGCTACCCCAAGCCAGGAACTCTGCCTCCAAATGTCTCGGCCGCGGTCAATGGCGTCGCGTTTTGTGGCACTCTTGCTGGCCAGCTCTTCTTTGGGTGGCTTGGTGACAAAATGGGCCGGAAAAGAGTCTATGGCATGACACTTATGATCATGGTCATTTGCTCCATCGCCTCGGGCCTTTCCTTTGGCAAAGACCCAAAATCTGTCATGGTTACATTGTGCTTTTTT…
>F01_transcript_101450
ATGTGCTCAACAAAGCAGAAGCATAAGCACCGGAGCTCCGATCAAAGCCCTAAACCCACCTCCACCGGCACCGGAGATGACTGGAAAGAAGAGGCAATTCACGGCGGATCTCTAAAACATGTCGACCTCAGTACTGGATCCAACGGCTGGGCTTCACCGCCAGGAGAACTTTTCCCTCTCCGCTCCCGGAACTATTTCTGTAAAAAACAGAAATCCCCATCTGGCCCGTGGCTCCTCCAGCCAGCAGGCGTTGACTGGCTCCGATCCGCCGTTAAACTCGACAACGTCCTCGGCCGGCCGGACAACCGTGTGATGCACGCGCTGAAGAAGTCCCAGTCCAAAGGCTGTAACATGAAATCATATGTTCTCGCCGTTAACCTCCAAGTCCCCGGTAGGGAC…
>F01_transcript_101453
ATGGCTGACCAGTCAGATCTGAGGTTTTGCTTCAGAATTATTTCACCAACAAAGAATTATACTTTGCAGGCTGAAAGTGCCATGGATCAAATGGATTGGATTGAAAAGATAACAGGGGTTATTGCTTCGTTACTGAGTTCTCAGACTCCTGATAGGTGTATGCCTGCTAGTCCCATGGGAAGTTGTCATCATCGATCTGCCAGTGATAGCAGTTCTTTTGAAAGTTCTGATTTTTGA
>F01_transcript_101456
ATGATGCTGAGACAGAATTCCCTACCTAGTTACACTGAAGCTGACCTCTCTTTTGCAACTGAGCATGGGGAAAAAGAGCTTTCATGTGATGAACATCCTAAGAGTGGCCATGAAAGAGCTGTTCCAGTTATGGCGAGTAAAAACAGCTATGGCTCATGCTCCACAAATTTTCCAAGTAGTTCTTCCCAACAATCAACCATGGCTACAATGTATGAGAATTCTACACCTTCTTTTGTTTACCAACGAAGGAAGCAGCAAAGGGTCTCTGCTGCTGTCTTCCCAGCCCAAATATCAACAAAAGCAAAGCCAAGTGGTAATTGCCTTTCGGTCATCAGTTCTGAAACCCCTTCAGTGTCTGCCAAGGAACATGTAGAGATTGAAAGTCAAGCTGTCAGAGCT…
>F01_transcript_101459
ATGACAATCAGTATTTCCGATTTGGTTGTAACGGATCCGGAAAATGAAGAATTTGAGAACACGGCATTTGAAATCCTTACAGAAATTCATACATATTTATCCTCTCCTTCATGGACCAGGAAGTTATGGACGCACTTTCATTTGAGTTGCCAAAGGCTGTTGCTAGGTTTTCAAGCGCCTCAAAGAGGTGTATCAGTGTTTAGAGGATTGATGGAGTCATTCATTGCAGTGACAGATGGTGATAGAGCTGTAGGTTCTCAGTCATTAATTTTGCAACTTAATGGTTCATGTGTGGTTGTTGTTGCGTGTGGAGCTGGTTAA
>F01_transcript_101461
ATGCCAAATGTCTCAGGCTGGACTGCTTTCAGCTATTTTTTATCTATTCATCTTTCTTCTGATCAGGAAATTATCAAGGATTTGAAGATGCTATATAATGAAAGTAGATCCAACAGTTGTATAGAGCATGCAGTTGGGATTATGGAACTGGAGAAGGCTCCAAATAACCTCTCTGAAAAGATCTCTACTATGTCACTAACTGGAAAGGATAAGAAGTTGGAAAACTTCCTTTTGGAGAAATTGGATACTTATGAATCTGCAGTTGGTGATTCTAACACCAGAGGAGCTCCACGTATTGAAACCTTTCCGCCAGCCTTCCAAGCAATTCCTCGCAATCCGATTGTTCTTGACCTTGCCTATAACTCAATCGAGTTCCCATCACTCGAGAACAGGATGAAG…
>F01_transcript_101462
ATGACATATGGTTCTGCAGTTGATATGTGGGCGATGGGTGCGATCATGGCTGAATTGCTAACTCTACGTCCCCTTTTTCCGGGTTCAAGTGAAGCAGATGAAATCTATAAAATATGCAGTGTCATAGGCAGCCCAATGCAGATTGACTGGGCTGAAGGACTTGAACTAGCAAATGCAATCAACTATCAGTTTCCACAGCTTCCGGGTGTTCCTCTCTCTGTATTGATACCATCTGCAAGCAAGGATGCAATTAGCCTTATTGCATCACTTTGTTCGTGGAATCCTTGCACAAGGCCAACAGCCTTGGAGGCTCTTCAGCATCCTTTCTTCCAGAGTTGCTATTATGTTCCGCCATCTCTTCGCCCTAAACCCGTCGTTGCAAAGACTCCTCCGTCTGCT…
>F01_transcript_101464
ATGGCTTTACTTGAGGCCAAAAAGATGACATCTCAGTATCAAAAGGAAGCAGACAAGTGCAATTCGGGAATGGAAACTTGCGAAGAGGCTCGAGAAAAAAGCCGAAGCGAATTTAGCGGCACAAAAAAGACTGACTTCAATGTGGGAGTTAAGGGCTCGTCAAAGGGGCTGGAAAGAAGGTGCTGCCAAATCTCATACGGAGTCTTAAGGTAA
>F01_transcript_101465
ATGACCAAGAAGAAAAGTAATGGATTTGAGAAAAATAACGATGAAGGGAAGAAGAACAACGGAGGAGGAAAGAAGGACGAGAGAGTTTCTATGATTGACGTGGTTCTCAAAATCGAATTGCATTGTGAAGGTTGCGCCTCCAAAGTTACCAAATGCATTCGCTCTTTGGAAGGTGTTAAGTCGGTGAAAGGATTTGACGGCGACATGAACAAGCTCAAGGTCGTCGGAAATATAGATCCGTCTAAACTCCGAGAGAAGATCGAGCAGAAAACTAAGAAGAAGGTGGAAATTCTCTCTCCAGTCACGAAGAAAGACAAGGGCGACAGTAACAAAGAGAATAAGAAAGATGTTGACGGAGATGAGAAGAGCAAAAAGTCCGATGAGAATAAGAAGAAAAAT…
>F01_transcript_101468
ATGGCGGAAAGCCGGCGGTACGGTCTTGGAGCTCAATTAGATATTGAGCAAATACTCTTGGAAGCTCAACATCGATGGTTACGTCCTGCAGAAATATGTGAAATTCTTCGAAATTACAACAAGTTTCGTATTGCACCCGAGCCAGCAAATAAGCCTCCAAATGGTTCACTTTTTCTTTTTGACCGAAAAGTGTTGAGGTATTTTAGAAAAGATGGACATAATTGGAGGAAGAAAAAAGATGGAAGGACAGTTAAGGAAGCTCATGAAAGACTCAAGGCTGGAAGCATTGACGTTGTGCATTGCTACTACGCTCATGGAGAAGATAACGAAAATTTTCAAAGGCGCAGCTATTGGTTGCTTGAAGAGGAGCTCTCTCACATAGTTCTTGTACACTACCGG…
>F01_transcript_101469
ATGGAATTACAGAGGGGATTCCCTCTACTGTTCCAACAATTCAAAGCTTTGTTCGTTAAAAACTTTATTCTATCATGGCGAAACAAGCGGGCCACATTCCTTCAACTATTCTCCTCACTCTTCTTCATATTCCTAATCTTCTGCATCCAAAAAGCTATCGAAGCTCGTTTCGGATCTTCTACATCATTTGAGAATGTATTTGATCCCCAAACAGTTTTCTCCCATCCAATTCCTCCGTGCGAGGATAAGTATTACATCAAGCTCCCGTGTTATGACTTCGCTTGGAGCGGCAGTGATTCCCCAAAAATTGCCAACATCGTCAGCCGAATCATGGAAAATAACCCTGGAAGACCTATTCCTTCCACCAAGGTAAAACCATTTAGAACAAGCAGTGAAGTG…
>F01_transcript_10147
ATGAATCTTGATATTTTCACTCAAGCTGTTGTTAATGGATCCTATAGTGCTCCCTATTTTGTCACTCGATTCCGAGAGGCACTGTTCCACTACTCTGCATTATTTGATATGTTTGATACTACTCTGCCTCATGAAGATCAGCACAGATTAACTTTAGAGAGAGAGTTCTATGGGCGCGAGGCTATTAATGTAATTGCATGTGAGGGCTTAGAAAGGGTTGAGAGGCCCGAGACTTGCAAGCAGTGGCAGGTTCGCAATATGAGGGCTGGTTTCAGGCACCTTCGCTTAGACCAGGAGCTCCTGAAAAAATTAAGGTCTCAGGTCAAGTCAGGATTCCACATAGATTTCGTGTTTGATCAAGACAGTAATTGGATGTTGTAA
>F01_transcript_101470
ATGGCGAACTTGAAGACTGATTCTCCCCTCACTCGTCGCATCGTCCTTTCGTTCATAGACTTCCTGAATTCTGTTGAACCTGCTCCTGGTGTTGATCTTGAAGGCCTTGAGGTGGCAAAGGAATGTTTAGCAGATGTGTTTAAGATTGATCCATTAATTGATAGTCCATCAAAACCTGATTCTTTAGTTGACATATTCAGTTCAAGGGAATTTATCGAACAGCGTGAAACTAAGGCAGATTCAAGTCATGACCAATTCTCTGCTGATGCTCCTAGTACATCCTTAGCACCTGATGTGACTGATGCCAATCATGCAGCAACATTACAATTTCAGGACAAAGATTGGACAAGAGAAGCTCACATGGAAGGTAAGTGTTCCCATCTATCTGGTCTTGGTTTC…
>F01_transcript_101472
ATGGAAATGAATTACATGTTAGCATACGGTTCAGCTGAATCTTCTTTGAGGTTATTATGGAAATTTGGTCTTCTAGATATACTTCTACCAATTCAGGCAGCATATTTTGTCCGCCATGGTTTTAGAAGACGTGACAAAACGTCCAACATGCTTTTGCGTCTGTTTTCTAACATGGATAAATTTCTGGCCCCTGACATGCCTTGTCACAGTAGCTTGTGGGTTGCCATTTTAGCATTCCATAAAGCACTATCAGACCAACCTAGGAGCCCTTTTGTGGTTGCTGCTTTTGGCCTTGCTGTTCACAATGGCGGAGATATGTTGGAAGCTCTAAATATAGCAAGAAGGATCTCCAGACCACATGACATTAGCTTTTATGAATTATTGGAACCTCATAATTTG…
>F01_transcript_101478
ATGGATGCACAAGATACTGCTCTTGTTGATGGTGGAGGATTCAAAACTCAAAAAAATCATGATGTGCAACTGTCAGGACATTCTGATAAATCTCTGATCAATGGCAATAATGGATTTCAACTGTCCAAAAGAATTGGGTGTCAAGCTCAAAAGATGGTATCTGAGAAAAGGAGATTCAGCCCACGACTATTAGAGATACCAGAAAGTAAAAGGCCTTATTACGGCACTTCTAGAATGTCAGGGCATTCTGATAAATCTTTGAGCAATGACAATAATGAATTTCAAGTGTCCGAAAGAATTGGGTGTCAAGCTCAAAAGACGGTATCTGAGAAAAGGAGATTCAGCCCACGACTAATAGAGATACCAGAAAGTAAAAGGCCTTATTACGGCACTTCTAGA…
>F01_transcript_101480
ATGAATAATGTTAGAGACACAAACTATTCTACAAACATTTTACAAATTGCTGATGTGGCATTCTCCACCTCAGCTTTTTATGTGGGGCCAAAGACTACATTGCAACAATTTGTTGATCAATATGTTGAGGGTTGTAGTATGTCACATCAGTAA
>F01_transcript_101481
ATGGCTGCCTTCTATGCCGGATTTCCTGACACTGTGCCTATCAGAACCGTCAACAGGCAATGTTCATCTGGCCTTCAAGCAGTTGCAGACGTAGCTGCCTCCATAAAAGCAGGATTTTATGATATAGGGATCGGGGCTGGACTAGAGTCCATGACAGTTGATCAAGTTGGTAGGATTCAAAAAGTCAATCCAAGAGTAAAAACTTTTACACAAGCCCGAGACTGTCTTCTTCCAATGGGCATTACTTCTGAAAATGTTGCAGAGCATTTTGGTGTGACACGACAAGAACAAGATCATGCTGCAGTTTTATCTCATAAACGTGCTGCTGCTGCAACTGCATCTGGAAAATTCAAGGATGAAATTATTCCGGTTTATACCAAGATTGTGGACCCCAAAACT…
>F01_transcript_101482
ATGAAATTGGTATACACAGATGGGAAACCAAACATATCTGCACATGGAAGGAAGGCAACTATTAGCGACTTCTATGCTGTTATATTACCATCTCTTCGGCGGCTCCATAATGACTTAGCAGAGCTGGATAACATAAAAGATGAGAAGCCTGGAATGGTGATCATTAGCAAGAAGAGACTGGAAACTGGCTTTTCCAATGTTGATTTGGACAGAGAAGATGAATGTGGAATATGCTTAGAGCCTTGCACCAAAATTGTCTTGCCTAATTGCTGTCATGCCATGTGCATTAATTGCTACCGTGATTGGAATACCAGATCAGAATCATGCCCCTTTTGTCGTGGTAACATAAAGAGAGTCAAGTCAAGAGACTTGTGGGTTCTCACTTGTGGCGACGATGTA…
>F01_transcript_101483
ATGTTTGTGAATTTTGTGGCGGCAAAGTTCTTCTCTCCTCCTCATCTCTATCACACGATATCTGATTCTTTCACCACGCTCTATTTGGAGCTGGCCATACTGCCTTGTTCACGTTTCCTTCTTGAGCGACCTGTTGATAGCCTTCAGCGCTTGGTTAGGATGACAAGAGGGATTGCAGATCCATTAGCATCAGCATTTTGCCGTTTATACTTAGTTCACCGTGCTCAGAAATTACCACAGTTTGATATAGGACATCTGATAGCCTGCATTAAGGACATAAAAGTTCTTTTGACGCGAATCATATCGGGGCAAGAAGTTACATGTAAAGGAGGTAGAAGTTTGCTGATCAGCCTGATGGAACCACCTATTGAGTACATTGTGAAATGCATATTTAAGGAA…
>F01_transcript_101484
ATGCCTATGCAAGTGCCATTTCACCAGCCACAGTTGTCGGTTCAATTTGGTGGGCCTAACCCGCAATTGAAGTCTCAGGGTATGGTGAATACTTCATTGCCGATGCCCTTACCAATGGGAAATCCATCTCAAGTGCAGCAGCAAGTATTTGTTCAAGGTCTTCAACCCCATCTGATGCAAGCTCAAGGAATCATGCATCAGGGACAGACTATGAATTTCTCATCTCAAATGGATACCCATCTAGGTTTTTTTGCACATGCTTAG
>F01_transcript_101488
ATGCCAGTAAATGTGAACAAAGAAGAATTGCTTGCCCAGCTGCCTAAAGATATATCACTGGATTTCCAGAAGAAGGTGACCTTCCCAAAGCACGAAATGCAAGACACTAATTCCAGCTTCTTCTTTGGCAGCCACCAAAGTCACAAATCACTTGCAGACGTGGAAAAAGAAGATCATCTCCTTGATCAAGTGCTGCGTTCGAGAGGCTTAGCTGTGGAGAAATCAAGAGCAGATCGACAACACATTATCCTTGTGGCGTCACTTCTTGATCGCATACCTAACCTTGCTGGATTAGCACGGACATGCGAGGTATTTAAAGCAGCTGCTTTAGCCATTGCTGATACAAATGTAGTGCATGACAAGCAGTTCCAGCTCATCAGTGTGACAGCAGAGAAGTGG…
>F01_transcript_101492
ATGGCTGGTAGTAATGAAGTTAACGTTAATGAAGCCAAGAGGGTTGTTCCACTGAATACATGGATTTTGATATCTAATTTCAAACTAGCTTACAACATGCAGCGTCGTCCTGATGGAACAATCAATCGCGATTTGGCAGAGTTTCTTGACAGGAAAGTCCCTGCCAACACCATTCCGGTTGATGGGGTTTACTCTTTTGATGTTGTTGATCGGGTTACCAGCCTTCTCAATCGTGTTTATCGATCAGGCCCGGAAAATGAAGCTCAGTGGGGCCTCGTTGAACTCGAACATCCTTTGAGCACCACTGAAATTGTGCCTGTCATTATTTTCTTCCATGGTGGAAGCTTCGCCCATTCCTCTGCCAATAGTGCTATATATGATACATTCTGCCGCCGCCTT…
>F01_transcript_101493
ATGTCTGAATATGATCCAGTAGCCAAGATATCCATCATTTTCCGTGGCCTTACCTTTTTCACTCCAAATGAAGAGAAGCTCGAATCTGGGCTTTATAGCAGAAGCTACTTGGAGAATCAGATGGCTGTTACCCTTGGTGGAAGGCTTTTTTGCACATGCTTAGGTAGTAGCTTAATTTTGTGGATAGTTTGGTTTATTTTGTGGATGCATGTAATCAAATTCATAATTCAATATAGTAGTAATTTATATTAA
>F01_transcript_101494
ATGAGTGTTGAAGTAGTTGGTGGGATCAAAGCCAACAGCCTTGCAATTTTAACTGATGCTGCTCATCTACTTTCAGATGTTCCAGCTTTTGCTATCTCTTTGTTTTCTTTGTGGGCTGCAAACTCCCCGTCAATCTTACGGATTCTTTAG
>F01_transcript_101496
ATGGAGTTTCTACATGCAAATACTAAAAGCTTGCTGGATAGCGATCTTCAGGATGGTAACTACATCTCAGCCCAAGGCAAGAAAGTAGTGGTAATTGGTGGAGGTGATACTGGCACAGATTGCATCGGGACATCTATTCGACATGGTTGTAGTAGCATTATAAATCTGGAGCTTCTCCCTGAGCCACCAAGAAAAAGGGCGCCGGGTAACCCTTGGCCACAGGTTTGA
>F01_transcript_101497
ATGCCACACTCACCAGAGATTCTACTTCAACTGCTCCAAAAATTCAACAAACACTCCAAACAAATCAAACAGATTCATTCCTTCCTAATAACCAACAATTTCCTCCTCTCTACTCCAAACACTACATCAAGGTTGAAATGGATGAGTACCCTCCTTCACAACACTCTTATAAGAGCCTACCTCAACCTTAATCAACCTTACAAAACATTACTCCTTTTCACACATATGCTTTCCCATCAAGCCCCACCAAACAGCCACACTTTTCCTTCCCTTGTCAAAGCTGCATCTAGTTTACCCTCATTGAATTCACTATTACCAAGGTCCCTTCATACCCAAGTCATTAAGCGTGGCGTATCAAACGACCCATTTATTCAGACATCCTTCCTTAGCCTGTATGCT…
>F01_transcript_101498
ATGGATGCTGAAGACTGTGAGCAATTTACTGACATTTACTGGATTAAATTTTGCCATGTCAACAATGCTAGGTTTGCAAAGAAGAAACTAGATGAACATGTTTTTTTTGGGAACCGGCTTCAAGTGTCTTATGCATCTCAATTTGAGAGCCTCTCTGACACCAAAGATAAGTTAGAAGGTAGAAGAAGGGAAGTTATTACTCGATTGAACCCTGGAAGATTCAAAGGATCAACAACACATAACCCTAGTTTTTCCAGTGAGCCTTTATTGTCTGGGACTCCATCAAAGACCAACTACATATCTCCTACGACAAATTATAATCAAGGGCAGCAAACCTTTTAA
>F01_transcript_101499
ATGGATGATGAATATGAGAAATTTATTAGGAGGATGAACCCACCCAGAGTTGTAATTGATAATGATTCCTGCAAAAATGCTACTGTTATTCAGGTGGATAGTGCTAATGAACATGGAATACTTCTGGAGGTTGTACAAGTTCTTACTGATCTAAACCTTACCATTACTAAAGCTTACATATCTTCTGATGGAGGCTGGTTTATGGATGTCTTCAATGTTACTGATCAAGATGGGAACAAAATCACAGATGTAGAGGTTTTGGATTATATTCAGAAGGCTCTCGGACCAGATTCGAGTTTTGCTTATTCTATGAGAAGATCTGTTGGGGTTAAATCTGCCACGGACCACACGGTTATTGAGTTAATAGGAAGTGATAGGCCTGGATTACTCTCTGAGATG…
>F01_transcript_10150
ATGGGAGGTGTAGAGGATGATGAACCACCCTCAAAACGTGTGAAAGTATCCTCTAAACAATTGAGAGGCCTTGCAAACGGTAAATCTATCAGGGAGCCTGCAAGTTGCTCATTGAGTTTCTCGATGGCTCGGCCCCAGTCATCCCAAGGGGACGACGAGATTGTTGGTTCAAAAGGGATTGTTAAGAAAGCGGAACTTGTCCGAATCATAACTGAGGCATTATATGCGCTTGGCTATGAGAAGACTGGGGCACATCTAGAAGAAGAGTCGGGGGTTCGTTTACAGTCATCTGTAGTAAAAAAATTTATGCAGCTAATTCTTGATGGAAATTGGGATGAAAGTGTAACCACATTGCATAAAATTGGCCATATTGATGAAACTATTATTAATTTGGCATCT…
>F01_transcript_101503
ATGGAAGTACTGGTGATAGTTGCCAAGAACAGTGGAAAAAAAGCATTTACAAACACTTTTCTCAAGGTTGATGCTGAGATTGGAGGAGAATCTACTGTTGTACCTGTTGCTCCAGAAACTGTTGGCTCTACTGCCGTTGTTGCTATTGTTTGCTCCTCTCACATTATAGTGGCAAATTGTGGCGATTCTAGAGCAGTCTTGTGCCGTGGGAAAGAACCATTAGCATTGTCAGTGGATCATAAACCAAATCGAGAAGATGAATATGCGAGGATTGAAGCAGCTGGAGGGAAGGTGATACAATGGAATGGGCATCGTGTTTTTGGTGTTCTTGCAATGTCGAGGTCCATTGGAATGTGTTTCTTAACAATCGTAATCACGTGA
>F01_transcript_101507
ATGCATTTTTGGGAGCAAGCTCGGTCTTATGACAAAGCCTCTTCAAGTCCAATTGGATGGTATATAAGAAATGCTCAAACAAGGCAACTGTCACATCCACTTCCTGTTTTACGTGCTCGTGAGATTGATGAGTGGTCCAGAAGTCAAGACTATAAATCTCTTCTGAACCGTGCAGCACAGATCAATACCGTGCAAAAAGTTTAG
>F01_transcript_101509
ATGGCCGCCGATCGGGACATCTCCCACCGCAAAATCTTCATTCACGATCTTAGTTGGGATACCACACGCGAAACCCTAGTCTCGGTGTTCGAACCCTTTGGCGAAATCGAGGTCTGCAACGTTGTCGCCGATCGAGTTACAGTGTTCAGTAGAGTTGGTGGATCTGGAAGATGGGGGTCCCTGAAACCAAGCAACATTTGGCGAAATATGAAAGGGATTGTAGGATTTGTCATATGA
>F01_transcript_101510
ATGGATTATGAAAATGTAGCCTCTCCACCTAATTCTCCTTCTCTCTCGCCTTCTAATTTCAGTCCACAACGCCACTTTTATCTTGCCGTCGACAGGCTTCAATTTAAGATGGAAACATTGGTGGAACTATTGGGCATGGCTTGCCGCCGCCCGTGTCTGCCAATGGTGGTGTGCTGTAGCACACGCGACGAACTTGATGCTGTCTGTTCTGCAGTTTCCAACCTATCTTATGTTTCTATATCCCCTCTGTACAGTGACCTTTCTGAAGTAGATCGCTCTCTGGTTTTGGATAAATTTCGCCAAGGAACTATTAAGTGGAATAAAAATGCCACTATTCAATTTGCGGATGACGAAGAAACTGGAAAGGAAGAGCTCAAGTCTCGTATGATAGTCGCAACA…
>F01_transcript_101511
ATGATTTTGAAGAAAGGATCAATTCAATCAAACCTAGAATGCTTCCTTGATTGCACAACACCGGTGATTCCATCCCAATTCCTACCCAAGAGTGAGATCAGAAACCTCAATAAACTTTGGCATCCTTGGGAGAGAGAAAAAGTTGATTTCTTTACTTTGAGTGATCTCTGGAATTGTTATGATGAATGGAGTGCTTATGGAGCTGGAGTTCCAATCAATCTGGACAATGGAGATACCTTGGTTCAGTACTATGTGCCGTATCTTTCTGCAATTCAAATCTTTACTAGCAATCCATCCTTCAATTCTCTAAGGGAAGACGCTGATTCGGTGTGTGAGACAAGGGATTCTTTTAGCGATTCATTCAGTGATGAGAGCGAGATCGAAAAACTGTCGAGGTGG…
>F01_transcript_101512
ATGTCAGGCCAAAGCCAACGCTTGAATGTTGTTCCTACTGTTACAGTGCTTGGAGTTATTAAAGCTCGCCTTATTGGCGCCACAAGAGGTCATGCTCTTCTCAAGAAGAAGAGTGATGCTTTAACCGTGCAGTTCCGTCAGATTCTTAAAAAAATTGTCGAGACTAAAGAATCAATGGGAACAATTATGAAATCTTCCTCTTTTGCATTAACGGAAGCCAAATATGTTGCTGGCGAGAACATCAAGCATATTGTCCTGGAAAATGTTAAAAGTGCATCGATTAAAGTTCGATCCCGTCAGGAGAATGTTGCGGGTGTGAAGCTCCCCAAGTTTGAACATTTCACTGAAGGAGAGACAAAGAATGACTTGACTGGATTGGCAAGAGGTGGTCAACAGGTG…
>F01_transcript_101513
ATGATGATTTTTTTTGCTCTTCAGGGTGGCGCAAAAAAAGTCATCATTTCTGCCCCTAGTAAGGATGCTCCCATGTTTGTTGTAGGCGTCAATGAGAAGGAATACACACCAGACCTTCACATTGTTTCTAATGCTAGTTGCACTACCAACTGTCTTGCTCCCCTTGCAAAGGTGATCAACGATAGGTTTGGCATTGTTGAGGGGCTCATGACAACTGTCCACTCAATTACTGCCACACAAAAAACTGTTGATGGACCATCTGCCAAGGACTGGAGAGGTGGAAGAGCTGCATCATTCAATATCATCCCTAGCAGCACTGGGGCAGCCAAGGCTGTTGGTAAAGTGCTACCTGCATTGAATGGGAAATTGACTGGAATGGCCTTCCGAGTTCCGACTGTG…
>F01_transcript_101518
ATGGCGGTCTTAGGCTCGCCGGGAAGTGTGGAAACGACGACGATGACGACGGAGCACGAGTCGGATCTCAATCACGCCATTCGGAGGAGAACGAGCGCGGCGACAACTGCGAAGGCGGAGAGTGCGGTGAATCATCGGAATCAGATCGGAGAGACGGCGGAATTGGGGAATGAGTTGATTAATAGAGCTGAGAAGGTTGCGAATGGAACGGAGGAGAGAGAAAAGGAAGGAATAATGGCAAAATTCGAGTTTCGGCCGTCGGCTCCGGCTCATAGGAGAATAAAGGAGAGTCCTCTGAGCTCAGCTGCCATATTCAAGCAGAGCCATGCAGGTCTCTTCAATCTCTGTATAGTAGTGCTTGTTGCTGTGAATAGCAGGCTTATCATTGAGAATCTGATG…
>F01_transcript_101519
ATGAGCGCTGCTTTGCCTGATAAACCTGCTTCAACAATCTTAGAGCCCGAAACCAGACAGGTGGAGAATGTTCCTTTGATGACGGCAACAGATGCAGAGAAACTAGAGGCTAAGGTGAAAGCCCCAGTTTATGTCATGCAAAGAAGTTGGTCTGCTAAAAAATGTATTAAGAAAGTACAAGTTGAAACACTTGAAAGAGTTTATAGAACAAAGTGCCCCACTATATTGTCGACTATGCACAATTTGTGA
>F01_transcript_101522
ATGGGAAAACCTCCCTGGGTATTCAAAGGCAGTGCCATATACCAGCTCAATCTTGTGAAAGCAGAAACTGCCCGAGCTTTTATACCTAGAGAGTTTAGACTTGTTGAAGCTTTTGGATATACTCTTGGTGGCTTCTTTCTTGCCAGTTATGATGACAGCCCAGCTGGAATCTTTGATGAGCTGGTGGTAATTGCTGGAATTGTATGGAACCCCCCTACATCTTGCGCATGGGCTGCTAGGGTACTTGTTAACAGTGATGAGGCATGCACTCATGGACGAAAGGATGTAGGACTTCCAAGTCAAGTTGCCAGGTTTTCAAAGAGTATTGCAGCTATTCCAAAGCCAAAAAGTAAAACCAGTGGTTTCCTAAACATGTTTGGTATGGGTACTTCCTCCGAT…
>F01_transcript_101523
ATGTCCGAGACTATGGACAGTTTCGAGCGCCAATTTGTAAATATGGAGGTTCAGGCCGAGTTTATGGAGAGTTCGATGGCCGGAAGCACTTCTCTTTCGACTCCCGAGGGTGAAGTCAACAGCTTGATGCAGCAAGTGGCTGATGATTACGGCCTTGAGGTCTCAGTTGGCCTGCCACAACCGGCGGCCCATGCGGTGCCCCTGAAGACTACGGAGAAGGTCGATGAGGATGATCTCTCTAGGCGCCTTGCTGAGCTCAAGGCCCGTGGCTAA
>F01_transcript_101525
ATGATGGAACATAAAAGAAGCCCCGTTACAATTGAGCAAGCCAGTCTCACTTCTTTGACACCAAAACGACTTAAGGCAGATATATCCATCTCCTCCAAGGAGAGGAAAGACAAGGTTGGTGAGCGGATTGTGGCTCTTCAACAGCTTGTTTCACCGTACGGGAAGACGGATACAGCTTCTGTCCTCCTCGAGGCAATGGAATATATAAGCTTCCTCCATGAACAAGTCAAGGTATTGAGCGCTCCATACCTTCATAGTACATCGGCGGCTAAAATACAGAATCATACAACCTGA
>F01_transcript_101527
ATGGGTTTACTTTCCACGCTTCTGAGATGGAACCATATTGATCCACCTTCAAGGGAAGAGAAGTTGCGAAATGAAAGAATTTGCAAGCTTTATCAGCACAACAGAAACCCTTTTGTTGATCATCCAGAATATGCCAATCTCATATGGGAACGCTTAGACTCCTTGTTAAAATGA
>F01_transcript_101529
ATGGCACAAGCAGTGAGGCATGATAAGGTTGAGCTCGAGTCATTGTTGTCTCAAGCCAAGGAAAAGGCGTTGCTCCGAAAGGACAACCCGGGCCAGAAAGTGAGCAAGGCTTATCTGCATGCAAATGAACTCACATATGCCAACCGCAGTAGCTGGAATTTTATTCAGGGAAGAGCTGAATTAAAGGAAAGCGAAGTCCTACAAGTTGATGGAGAATATTCGACAGAAAAACTTAAAGAAGGATCTTATAACGTGTATTTTGAGCTGATGCTTTCAAACGACTTTAACATATCATCACCGGTGAAATTTACACTTACTATTTCGAATGGATCCGTGCAAACGCACAAAGAAAATTTGATGAATTATCCGACCAACAAAAAGATTTGGATCAAAGCTGGG…
>F01_transcript_101530
ATGGGTTACCTGTTAAAAGAAGCTTTGAAAACTCTTTGTGGGGTTAGTCAGTGGTCTTATGCTGTTTTTTGGAAGATCGGTTGCCAAAACCCAAAGCTTTTAATTTGGGAAGAATGTTATTACGGCCCCATAACTTATTCTGATCTACCACAAATGTCTGGTATTGAGAACCCAGACTTCACTTTTGATGACTGGGAAGCTTGTTTTGTATCTGCTGAAGCTCGCACGTCTCTTCTTGGGGTACAAGCAGGGGATAAAGTCCAGTTGCTTGTTAACAAGATGATGATGGACAATCATGTTAATCTTGTTGGAGAAGGGCTAGTTGGGCGGGCTGCATTTACCGGAAACTATAATTGGATTCTTTCTCAGAACTATGCTAGAGAATTCCATCCACCTGAG…
>F01_transcript_101531
ATGGACAAGCACGTCGTTGGTATGTGGGTGTTAGATTACATTCTCCGGCAACCTCTCGATGATACTGATTTGAGCTCTTTGATTCGTATTTTACGTCGTTCCGACACCAATTCGAATCTGAAAAAGCTTTTGCTTTTGAGAAAAATCGAGTCCGAAATCTTTAAGGGTTCGATTTCCGAGAATTTGCTCGAATTGCTGGAAAAGATCGAAGAGTTAGAGTATAGAGACAAGATTGGGGTTACGGAAGCTATGAAGAACGCTTATTGTGCAGTGGCCGTGCATTGCGCAGTTAGGTTTTTGGAGGAGAACGAGAAGGAGATGTATTTTGAGGCGGTGAAGAATATTTGGAGGGCTAGGGTTTGCAAAATGGGGAAGACGGAGAATGTGGGGTTGGTTTCG…
>F01_transcript_101532
ATGAGTGTGATGGCAAATGGATGGGGCTCTAGAGAGAAGGCGAGGTTAGCACTTAAAAGAATGCAGCAGGTTCCTAAAGAGGATGAGAACTCTATGGCTCTTACTCCTGTAAATCAAAGTGATGAAGAAATCGTTGATGATAAGCCTCTTGCAGTTTCTAGTGGTTCTCCACAGATTGGTAGTTCAAGCAAAAGATCTATTATAAGGTTGGACAATCTTATAATGGAGGCTATAAACAACTTGAAGGAATCCGGTGGTTCTAATAAGACAACTATAGGCACATACATTGAGGAACAATACTGGGCGCCTCCAAACTTTAAAAGACTACTGTCTGCAAAATTGAAGTTTTTGACTGCAAGTGGTAAGCTGATCAAGACGAAACGCAAGTACAGAATTGCT…
>F01_transcript_101533
ATGCAGTGCCCTCTATTATGCAAAGATTTTATTATAGATAAGTGGCAAATCTATTATGCTTGGAGTAAAGGTGCAGATGCAATTCTGTTAATTGTTGGTGTTTTACCCGATCTTGATATTAGATATATGTCTACGATTTGCAAGAATCTTGGGTTGGAAGCACTTGTTGAGGTTTGA
>F01_transcript_101535
ATGGCAGCACATGGCGTGACAACTCTGATATATTCAAGTACGTGTGCAACCTATGGGGAGCCTGAAAAGATGCCAATCACAGAAGAAACTCCTCAGCTTCCAATTAATCCATATGGAAAAGCCAAGAAAATGGCAGAAGATATCATCTTGGATTTCCATAAGAACTCGAACATGGCTGTCATGATCTTAAGATACTTCAATGTAATTGGATCTGATCCAGAGGGAAGACTTGGAGAAGCTCCCAGACCAGAACTACGTGAGCATGGACGGATATCAGGTGCTTGCTTTGATGCAGCTCGTGGTATTATTCCTGGACTTAAGGTTAGAGGAACAGATTATAAAACTGCAGATGGCACTTGCATACGGGACTACATTGATGTTACTGATCTGGTTGATGCT…
>F01_transcript_101536
ATGGCTGCATTGCCAAGGTCTGAAGTATCGTTTAGAAGATCAGGCTCATCAGGTTTGGTATGGGATGATAAATATTTATCCGGAGAATTGAAGCCCATACAGACTAAAGAAGGCGAAAATGCGGCTGATAATCATAAACCCAACAAAGATCATGATCAATCCAAAGATCAAGACAACAAGCTTATCGGACGGTTGAAATTACTCCCACCATTGATCCGCCGTCTCCTAAAGTCTCCGCCGGCTGTGGCATATGTTTTGGGAAAGCAAAGGCAAAGCCGGAGAAAAAGACCCATAAAAGGAAACCCGGCCATCGTTGGAGAAGTGTTCAAAGAAGATAGGCTGCCTGCCTGCCTGCCTGCCTGCCTGGCTGCCAGTTCTCATCCCAATTTTGACTTCTTC…
>F01_transcript_101539
ATGCTTACGAATCTTGTTGGTTCTGCTGTTGCTGGTGCTCTTGGTGGCTTTAATGCCCATGCTACCAACATCGTCTCTGCAGTTTTCATAGCCACTGGGCAGGACCCAGTGCAAAATATTGAAAGTTCTCACTGCATAACTATGATGGAGGCCATTAACGATGGAAAGGATCAGAGCAAGAGGATGGTTATCGCTACATCCCTCAGTTAG
>F01_transcript_10154
ATGGATACTAAGATCGGGGCAATTGATGCTTGCAAGTCCACTAGCCACTTGGCTCGGCGGCTGGTCGAGATCGGCGTGAGCGACGTCTTCTCCGTTCCCGGCGACTTCAACCTCACCTTACTCGACCATCTTGTAGCCGAGCCGGGGCTCAACCTTATAGGCTGCTGCAACGAGCTCAACGCCGGGTACGCTGCCGATGGCTACGCTCGCTCTCGTGGAGTCGGCGCCTGCGTCGTCACCTTCACCGTCGGCGGACTGAGCGTGCTCAACGCGATCGCCGGCGCTTACAGTGAGAATCTCCCCCTCATTTGTATCGTCGGTGGACCCAATTCGAATGATTATGGGACGAACAGAATTCTCCACCACACGATCGGACTGCCAGACTTCAGTCAAGAGCTT…
>F01_transcript_101544
ATGGAGCAGGTCATGGTTCTTGAGAATATCGGGACATCAGTTCTTGTCTCCGAGAATCAGCTTTCTGAACTTCATCACTTAATGGTTGAGGCTGCGGAAAAACTTAAAACTGAGGCTCCTGACCTCTATGTGCGTCAAAGTCCTGTACCCAACGCATATACTCTAGCTGTCAGTGGTAAAAAGCCATTTGTTGTTGTTCATACAAGTCTTGTGGAGCCTCTGACAAGAAAGGAGTTGCAGGTGCAAAGAACTTTGGTGTCACAGAGTTTGTGA
>F01_transcript_101545
ATGAGAAGTGTGGAATTCAAGGTTATTGAGACAGACCCTGCTGAGTATTGTGTGGTTGCCCCTGACACTGAAATCTTTTGTGAGGGAGAGCCTGTGAGAAGGGAGGATGAGGATAGATTGGATGAGGTTGGGTATGATGATGTTGGTGGTGTCCGTAAACAGATGGCACAGATTAGGGAGCTGGTGGAGTTACCGTTGAGACATCCACAACTCTTTAAGTCTATAGGAGTAAAGCCACCAAAAGGAATTTTGCTCTATGGACCACCTGGATCCGGAAAAACTTTAATTGCCCGAGCTGTTGCAAATGAAACTGGTGCTTTTTTCTTTTGTATAAATGGACCGGAAATTATGTCAAAGTTGGCTGGGGAGAGTGAAAGCAATCTCAGGAAAGCATTTGAG…
>F01_transcript_101547
ATGCCTCACACTGCTGGAAGATACCAAGCTAAGCGGTTTAGGAAGGCCCATGCCCCAGTTGTGGAGAGGTTGACCAACTCTCTTATGATGCACGGGAGGAAAAATGGGAAGAAGTTGATGGCAGTTCGCATTGTTAAGCATGCTATGGAAATCATCCGCTTGTTGACCGACCAGAATCCTATCCAAGTCATTGTTGATGCTGTTATCAACAGTGGTCCAAGAGAAGATGCCACTCGTATTGGTTCTGCTGGTGTTGTAAGGCGTCAGGCTATTGATATTTCTCCACCAAGGCACGTCAATCAGGCAATTTATCTCCTCACAACAAGTGCACGTGAGAGTGCATTCAGGAATATTAAGAGTATAGCTGAGTGCCTCGCTGATGAACTCATAAATGCTGCC…
>F01_transcript_101551
ATGTTTACCTCAAGAAAGAAGATCTCCAAAGACAATGGTCTTGAACCCACTGAATTTGAAGAGACTGTTACCCAGGCACTATTTGACTTGGAAAACACAAACCAAGATCTTAAAAGTGATTTGAAAGACCTCTACATTAACGCGGCTGCTCAAATTGATATCTCTGGGAATCGCAAAGCTGTTGTGATACATGTTCCGTATAGATTGAGGAAAGCTTTCCGCAAGATTCATCTAAAGCTTGTAAGAGAACTTGAGAAAAAGTTCAGTGGGAAGGATGTGGTAGTTATTGCTACACGAAGAATATTGCGTCCACCAAAGAAAGGTTCTGCTGCTCAGAGACCCCGCTCCCGCACACTTACAGCTGTGCATGATGCTATGCTTGAGGATGTTGTTCATCCT…
>F01_transcript_101552
ATGGATAAAGATGGTCCTAGTGGCAAAGGGTTGGCAAACCAAAGAAGTAGTTCTTGGGATGAAGACAAGGGAGTTAGGAATGAAATTGTGGGCGGAGATGAAGGTTTAGGCTCATATGAGGAAAGTAATTTAAAGATTAATGGGGTAGCAGAACAAGTAAATAGTGGATTTGAAGGGGAAAACCATGTCTCTGATGTACCAGAAAAACAGCAACCTCAAGGGTCCAAGATACAGTGGGAAGACTTTCTTCCTAGAAGGTCACTGAAAATTATGCTAGTCGAAGATGATGATTCAACACGTCATGTTGTTAGTGCTTTGTTAAGAAATTGCAGCTATGAAGTTATTGCTGTGGCAAATGGTCTTCAAGCATGGAAAATCTTAGAAGATATGACTAATCAT…
>F01_transcript_101557
ATGGCTTCCAATTCGTCGAAAAACAATTCGCTATTACCAGTTTCGGATCCTCCTTCTCCTTCAAGAAAGGATGAGAAATTGCGCAAAGGATCGGGAATGAGTAGGCGTGGAATTTACGCTGCAATTTCTTACATGGCTTGCGCTGTGCTTCTGGTATTGTTCAATAAAGCAGCTCTTTCTTCTTATAGCTTCCCAAGTGCAAATGTCATTACTCTCTTGCAGATGATAAGTTCATCTTCTTTTCTTTATGCATTACGCCGCTGGAGACTTATTTCTTTTCATGCGGGTGAATCATTGACCAGTAGTGATAATTCCTCAACATTGGTACCAATAAAGGCGTTGATTCAAACACTACCTCTTGCGCTAACCTATTTGCTTTACATGATAGTTAGCATGGAG…
>F01_transcript_101562
ATGATATCCTGTCACCCTTATCTTTTTCCACTTTTTCTCTATTTCTATTCAAAATCTCATAATGTAATTATCGTAGGTCCTTACCATGGAGGCGTGTGGAGGATAAGGGTTGAACTTCCAGATGCTTATCCGTATAAATCTCCATCCATAGGCTTTATTGATAAAATTTATCACCTGAATGTAGACGAAATGTCTGGCTCAGTTTGCTTGGATGTTATTAATCAGACCTGGAGCCCCATGTTTGGTAAAAATCAGTAA
>F01_transcript_101564
ATGGCTCGCCAATATGTGCGTGGTGTTGTGGGATCTGTTCAGCGTGTTGCCACAGCTATTGCCCCCTCCCGGCTTAGCTCCCATTTGGGGCCAAAACCACTACCTGGTTCTCCTGAGGCTCTTACTCTTGCTCGTTGGATTTGCAGGAGCTACAGGGTTCACACTGGTGTAGATCTCCTTCGGGCAGACTCTCAAGTGGGTGATGCCGTCTTGAAACAACTATGGAATCACTCTGATGTAATACTGTGCTGCTCAGTGAAAACAAATGTAATGACATCACATTTCGTTCTTATGTAG
>F01_transcript_101571
ATGGTTGGGGAAAATTATGTGGCTCTTAATATTGATGTTGGTGATCCAGAGTCTGGGAAAAATGTCTTACATGAAGATATCACATCTGATGCTAAAGACATGATGGATATAGGAAGTGCTATGGAAGTTTTAACTAGAGTAGACTTGGACTTGGCATACTCTTCTGAAAAATTAGTGAATCTGGACACACTTATGATGCATGTGTGGGCCTGGGAAAATGATTTTGAAGCATTGGCTACTGACGATATCTCGGCGGACTGCATTGAGAAGGCATTGGCATTTGATCTCTTATCTGGTATCTTAGATTCAGAGGTAAGAGCACTGGAAAATTTCATGGGTACACTTCAAGCTCAAATGGTTGATGCGCGCCTTAAAATATCTTCATGCGGACACTTAAGA…
>F01_transcript_101573
ATGTCTAGATTCAGAAATAAAAAGAAAGTCGCATTTGTCAAGCCTGTTGCAAAGAAGCACCAGCAGCAGAGTGTTGATCATATAACTGGAGACAAGATACCAAGGAGCTTCGTGTTCTCAAGAGGGAAGTTGCCTGGTCCTCTCAGACAATTGCAAGCGGACTTTAGAAAACTTATGCTTCCCTATACAGCCCTCAAGCTCAAGGAAAAGAAGCGTAATAATCTCAAAGACTTCTTGAACGTTGCAGGACCAATGGGTGTCACACATTTTCTCATGTTATCAAAAACTGCAACTGCACCCTACTTGAGGGTTGCCAGGACCCCACAAGGACCCACACTTACATTCAAAATACATGAGTACTCATTAGCTGTTGATATTGCTCGATCCCAGTTGCGTCCA…
>F01_transcript_101574
ATGAAGAGCGGAAAATACACGCTCGGCTACAAAACCGTGCTTGAGTCTCTCAGGAGCTCCAAAGGTAAGCTGATTATAATTTCAAACAATTGCCCACCGTTGCGAAAATCTGAAATAGAATACTACGCAATGCTTGCAAAGGTTGGGGTTCACCATTACAATGGAAACAATGTTGATCTGGGGACCGCATGTGGCAAGTATTTCCGTGTGTCATGCTTAAGCATTGTTGATCCAGGTGATTCTGATATTATCAAGACTTTGCCCGGTGATCACTGA
>F01_transcript_101575
ATGGCAATGGCGGGGTGTTTGAGATCAACTCTTCCCCTAATTAGTAAACCTCTGACATCAGATTTGATTTCTTTTCGGGGATCATCTCTTCAACGATCCTTGCGTTGCCCTACTTTAACCAATCCAGAGTTCTCAAGGAATTTTGCCACTAGCTCTGCTCCGAAGGAACAGAAAATTAAGTGGCAACAAATTGATATTGAATATACCTTCTGGCAAATGCTTCATTTATGCACCTCACCGAAAGTTGCTGTTTCTATTAGTCATTGTTGGCTATTGGCTATTTGGACTTGGCTGGCTCAGTTGTCACTGCTGTTTCTATTAGTCATTGTTAGCTCACCCTATCAAATCGAGGCTGAAGATTCTTGA
>F01_transcript_101576
ATGGCTGATAAACCCTCTCTCACCATTATTTTGTCTCTCACCCTCCTCTTTTCTCTGTCCACTCACACCACCGGCAGGCTCATCGCCAACGACACATCGTCAACCTCCTCAGATCTCATATCCGACGGTGTCCACGATGATTTCCGGATCCAACAGGTGATCCGGCTCAACCCGTTTTCCGCATCTGAAGAAGCTTGCGAGCAGTCTTACGGCTTCTTGCCTTGCACGACCACTGTATTCGGCAACTTATTTCTCATCCTTGTCTATGGTTATCTCATGTTCCTGGCTGCTACTTATCTCTCCGGCGGAAGCGAGCTGTTGTTGGAAATTCTCGGTCCTGGCATCGTCGGCGGCCTCTTTCTTCCCGTCCTCGGCGCTCTTCCCGATGCCATGCTCATT…
>F01_transcript_101582
ATGGTTGACCCTAAAGTGTCAAATAGATCATCACGTTTTGCACAAGAGCTTATCTCAACCATTTTATTCACTGTTGCTGTTGGTCTAATCTGGGTGCTGGGTGCTGCTGCACTTCAGAAGTATATTGGTGGCCTAGGTGGAATGGGAACTTCAGGTGTTGGGTCAAGTTCTTCGTATGCTCCGAAGGAGCTGAACAAAGAAATAATGCCTGAGAAAAATGTCAAAACATTTAAGGATGTCAAAGGTTGTGATGATGCTAAACAGGAGCTTGAGGAGGTGGTGGAATACCTAAAAAATCCGACAAAGTTTACTCGACTTGGCGGGAAGTTGCCGAAGGGAATTCTTTTGACCGGAGCTCCTGGAACAGGAAAAACTCTGCTGGCCAAGGCTATTGCTGGA…
>F01_transcript_101583
ATGTCCGGCAGCTCTCCGCCGTTCTCCTCCGTAAGAAGATCACCGGCCACTGGGGCTAAGCTTAGTCCTCAGCTCCGCCAGCTCGTCAAACAGTCCCTTATTGATAGCATTACCCTCGAGCACAGTCCACTAGTGAGGCGAGCTAGTGCAAATGTGGTTAGTATTATCGCAAAGTATGCTGTGCCATCGGGGGAGTGGCCTGATTTGTTGCCTTTCTTATTCCAATGCAGTCAGAGTGCACAAGAAGACCATAGAGAAGTGGCATTGATACTCTTCAGCTCCTTAACTGAAACAATTGGAAATTCATTTCGACCACATTTTGCAGATTTACAATCTCTGCTACTCAAGTGCCTACAAGATGAGACTAGTACCCGTGTCAGAGTTGCTGCACTCAAGGCA…
>F01_transcript_101584
ATGTATACTGATATAAGCACTGAAAATGCTATGCTTCAAGGTTCCCGGAGACTGAGCAAAGGTGTTGAGTACCTGGTTGAGGCATCAGCAGCAGAAGCTGAGGCTATTACTGCAACCTTAGCTGCTGCCAAAGCACGGCAGGTCAATGGAGAAGTTGAACTGCCAGATAGGGATCGGGGGGCAGAGGCTACTCCTAGTGGGAAACAAATATCTACTCTGATCAAGCCAGATTCTGCTGTAACAAACAATTCAGCTCCAGCTGGTGTTCGACTGCATCATAGAGCTGTGGTTGTAGCTGCAGAGACTGGTGGAGCTTTAGGTGGTATGGTTAGACAGCTTTCTATTGATCAATTTGAAAATGAAGGCAGGCGTGTAAGCTATGGAACCCCAGAAAATGCA…
>F01_transcript_101587
ATGTCTAAGGCAGAAGTGGATGTTCCCGCTAAGGGTGGCTTTAGTTTCGATCTGTGTAGACGGAATGAGATGCTAATGAAGAAGGGTCTCAAACCCTCATCTTTTCCTAAGACCGGGACAACAATTGTCGGTCTAGTTTACAAGATTGAGACTGGAGATGAGGATGATGAATCAGAGAGCTCAGATTCAGAATCTAATGACACTTCAATGTAA
>F01_transcript_10159
ATGTCCCCAAAAGATATACTGCGAAATGTTGACGAGTCTGCCAAAAGAGATCTTGGAACTTCACTACAGTCCTGTTCAGATAGTGTTGCAGAGCCTCCATCAAAGACTAAATTTGAAAGACCTAAAATATTAATTTCAATACAGGACAAGGATGGACTCAAGCATTTTCTGGCGTGA
>F01_transcript_101593
ATGGGTCCAGCTATCGGTATCGATCTAGGTACGACCTACTCTTGTGTCGCCATCTACCGTGATGACCGAATCGAAATTATTGCCAACGACCAGGGCAACCGAACCACACCTTCCTTCGTCGCCTTCACCGATACAGAGCGTCTGATCGGTGATGCCGCAAAGAACCAAGTCGCCATGAACCCTGCCAACACAGTCTTCGACGCAAAGCGATTGATCGGTCGCAAGTTCGCTGATGCTGAGGTTCAGGCCGATATGAAGCACTTCCCCTTCACCGTCATTGACCGTGCTGGCAAGCCAGTCTGCGAGGTCGAGTTCAAGGGCGAGAAGAAGCAGTTCACACCTGAGGAGATCTCTTCCATGATCTTGGTCAAGATGCGTGAGACTGCCGAGGCATACCTT…
>F01_transcript_101596
ATGGCGGAGAAGCAGTTGATCGTGGCTGTTGAAGGTACTGCCGCCATGGGTCCCTACTGGCATACCATCCTTACTGATTACCTGGAGAAGATTATCCGGTGTTTTTGTGGTAATGAGTTAACAGGGCAGAAGCCATCTGTTCCTAATGTTGAATTCTCGCTTGTCATGTTTAATGCTCATGGATCTTATAGTTCTTGCTTAGTACAAAGGAGTGGTTGGACAAGAGATGTAAATAATTTCTTTCAGTGGCTATCTGCTATACCCTTTGCTGGTGGTGGTTTCAGTGATGCTGCAATTGCAGATGGGCTTTCTGAAGCTCTGATGATGTGCTCTTCATTGAATGGAAACCAGCCTCAACAGAACGTGGATAGGCAAATGCATTGCATTCTTGTTGCTGCA…
>F01_transcript_101597
ATGGAACTCGGGAATTCTACTAGCATAGTAGGATCAACATCTGGCTCTCCATATTCAGCTAATATTCAGGGTTCCAACTCAGAGATGTTATATCATGGCGATGATAACAACGGTGATGATGGCAGTTATATTTCTGATTATGATGACAATGATGACTATATGTTTGACAATGATGTCGATTATAGTTATTTGAATATGCAAGCACAGTTTGACAATGTGGATTTTCCTCCTGGGGTAGAGATTTCATTTTCTTGGATGAAGCATACCACTCCCAGCATTAATGTTACAAGCAACAATGCTATGGTTCTCCCTACAGGTTCAGGGACAGAGACATCTGTTGCTATAGTTCCAGATCTTGCAAATTCCAATAATAACGCTGCTTCTTCAAGCAGTTCAACA…
>F01_transcript_101598
ATGTCTAATCTTATTGGATTCAATCTTGACGCTAAACTTGAGGGTAGAGACATGCTCTCACGGTCCTCTCTTCTTATAGAACTGGTTTCAAAAGGTGTAATGACCTACGTTACACAGGAAGTAAAAGATCTTTACCATCTTTTGGAGCATGAAATTCTGCCTCTAGACCTGGCATCAAAAGTTCAACCTTTGTTAGCAAAGATCTCAAAAGTTGGGGGAAAGATTTCATCAGCATCGTCTGTACCAGAAGTTCAACTGTCTCAGTATGTTCCTGCATTGGAGAAGCTAGCCACTTTAAGATTGCTCCGGCAGGTATCTCAGGTTTATCAGACGATGAAGATCGAGAGTTTATCTAAGATGGTACCTTTTTTCAAATTCTCTGCTGTTGAGAAACTCTCC…
>F01_transcript_101599
ATGTCTTCGACGAAGAAGATCACATTGAAGAGCTCTGACGGCGAGGTGTTTGAGGTTGACCAGGCCGTAGCTCTGGAATCACAGACGATAAAGCACATGATCGAAGACGATTGCGCCGATAACGGGATTCCCCTGCCGAATGTCACCAGCAAGATCTTGTCCAAGGTCATCGAGTACTGCAAGAAGCACGTAGAGGCTCCTACAACGGAGGATCGTGTTCCTGACTCAGACGATGACCTCAAGGCTTTCGACACCGAGTTCGTCAAAGTTGACCAGGGCACCCTCTTCGATCTCATTTTGACTGTTGCGGACATGATAAAGGGAAAAACTCCAGAGGAGATTCGCAAGACATTCAACATCAAGAATGACTTCACGCCGGAGGAGGAAGAAGAGGTCCGC…
>F01_transcript_10160
ATGTCGAAGGAGGGGGAGATTTCGATAGGATCATTTCCAGGGTTTAAATTTTCTCCGACGGAGGAAGAGCTGATATTATACTACCTGAAGAAGAAGATTGAGGGGTTTGATAACTGTGTGGAAGTTATTGCTGAGATTGATATAACTAAATTCGAGCCCTGGGATTTACCAGCCAAATCAATTATTCAGTCAGATAATGAGTGGTTTTTCTTTTCTGCTCGTGGAAGGAAGTACCCAAGAGGCTTGCAGAGTAGGAGGGCAACTGAATCCGGTTACTGGAAAGCCACAGGAAAAGAACGCAATGTAAAGACAGGTTCAAATATTATTGGCACAAAGAGGACACTGGTTTTCCACAAAGGTCGTGCCCCAAAAGGGGAGAGAACAGAATGGATAATGCAT…
>F01_transcript_101600
ATGGATGCACCTCCCAAGTCACCAGGAACTACAGATCATGGATTAATGAAAAAATTGAAAGGATTTGATGGTCTGGCAATGTCTATAGGTAATGGAATTGCTGACAGTAATGATGGTGGAACAAACCCTGGTATCAGAGCTTTAGGTGTTCAAGAGTGGCATACTCAAAGAATGGACTCAGCTGAAGCAGGCAGACCTAGCAGCTGTAGCACAGCAACTTAG
>F01_transcript_101601
ATGATCATAAACACTTATACATCATCCAATCAATGGCATGAATACAGATATATCACCTCTGACTGTGATGCTGTGGCCACTATATATGAATATCAGAATTACACAAAAAGTCCCGAGGATGCAGTTGCCTTAGCTCTTAAAGCAGGTACGGATATAAATTGTGGAACGTATATGCTACGACACACTCTATCTGCCATAGAACAGGGGAAGGTGCAAGAAGACGACATTGACAGGGCTCTTCTCAATTTGTTTTCAGTTCAACTCCGTCTTGGACTTTTTGATGGAGACCCTACTAAAGGGCCTTACGGGAAATTTGGACCAAAAGATGTCTGCACTGCAGAGCACAAGACATTGGCACTTGAAGCGGCAAGGCAGGGCATTGTGCTTCTAAAGAATGAT…
>F01_transcript_101603
ATGCTTACTAATTTTATTGCTACTCCAATTGAGTTGAGTTTGATGATACCATTCTTACGCTTTGGTGAAGTTGTAACTGGTGGACCTCAGTTTCCTTTGACCTCCGATGCTTTAAAGAAGGTGTTGAAAGGACAAGCTTCACAAGAGGTCTTTCAAAGCATCTTCCATGCATTGTTGGGCTGGCTTGTTGCTGCACCAATTATCTTGGCTGCACTCTATGTATTGTTTTTGCCCTGGTTCAAGATCCTGGTTCGCAAGTTCAACACTGGTTCTTCAAGCCCGAATGCATCACTCCTGTCCCTAACAGATGTCAGGCTCAAGGTTAGGGATGTTTGA
>F01_transcript_101604
ATGCCAGGCATACCTTTAGTGGTTCGTGAAACTATTTATTCTAGAGGTGCAGATCAAATGTGCCGTGAAGATTCTCGTGTTCATTTGACCGCGGAAGAGGAAATTGCAGCTGAGGAAAGCCTTTCAATTTACTGCAAGCCTGTAGAACTATACAACATTTTGCAGCGCCGTGCTATTGATAGGCCATCATTTCTTCAAAGATGTTTACACTACAAGCAACAAGCCAAGAACAAGAGGAGTTTGTTTCCAATGTACATATTGTTGGCAAGGCCACTTTCTAACATTTCAGAGCATTCTGCAGTTTATCACTTCAGCCGGATATGTATGTTGACCAATTATATAGGAGTTGAAGAGGTGAATCGATCTCATGTAAAATTTATTCTACCTGAGATGAATAAG…
>F01_transcript_101608
ATGACTGATAAATACAGTGTTGAAGCTGCGGAAAAGCTTGCTAATGAGGCACTGCATTTGCAAATTTCAGGGGCAGTCCCAATTTATGAGCAACTTCTAGCCACATTTCCGACAGCTGCAAAGTATTGGAAACAGTATGTGGAAGCACACATGGTTGTAAATAATGATGATGCGACAAAGCAATTGTTCAGCCGGTGTCTGTTGAACTGTCTGCAAATTCCTCTTTGGCGTTGCTATATTCGTTTCATCAGGAAAGTCAATGAGAAGAAGGGGATAGAGGGTCAGGAAGAGACTAGGAAAGCTTTTGATTTTATGCTCAGCTATGTTGGAGCAGACATTGCATCGGGACCTGTATGGATGGAATACATTTCCTTTTTAAAATCCTTGCCGGCTCAGACT…
>F01_transcript_101609
ATGGAAGTGGAGCAGCAGTTGGACACATGGGAAGGTTATGTGGACTGGAGAAACAGACCTACGTTCAGAGGCCGCCATGGCGGCATGCTTGCTGCCTCCTTCATCTTGGTGGTTGAGGTAATGGAGAACCTGGCATATCTGGCAAATGCAAGCAACTTGGTTCTATATCTATCGGAGCATATGCACTTTTCGCCATCCAATTCTGCAAATTCTGTGACTAATTTTATGGGCACCGCCTTCCTTCTTGCTCTCCTCGGTGGCTTCTTATCAGATTCTCTCTTCACCACTTATTACATCTATCTCATTAGTGCACTTGTTGAATTCCTGGGCTTACTGTCACTCACCGTGCAGGCTCGATCAGCTTCCTTAAAGCCTCCAAAATGTGACCCCAACATTCCA…
>F01_transcript_101614
ATGAAATTCCCAGACGTGATTCGTGCTTTTAAACCCAATCCCAAGTCTCACATTCAAGAGAACTGGAGAATCTTTGACTACTTATCCCACCACCCAGAGAGTTTGCACACCTTCACATTCTTCTATGATGACATAGGTGTTCCACAAGATTACAGGCACATGGATGGCTCCGGGGTTCACACCTTCACTCTTCTTAACAAGGCTGGGAAAGCAACCTATGTCAAGTTTCACTGGAGACCTACCTGTGGTGTCAAAAACTTGTTGGAGGAAGAAGCCATCAAAATTGGAGGATCTAATCACAGCCATGCCACCCAAGATCTCTATGACTCGATTGCAGCTGGCAATTATCCTGAGTGGAAGCTTTTTATCCAGACTATGGACCCCGATCACGAGGACAAA…
>F01_transcript_101617
ATGTTATCTGGGTTAATGAACCTTTTAAGGGCCTGTTTTCGGCCAAGGTCGGATCGGTATGTTAATAAGAGTTCTGATGCTGGTGGGCGTCAAGATGGGCTCCTATGGTACAAGGATACTGGGCAACACTTTAATGGTGAGTTCTCAATGGCTGTAGTTCAAGCCAACAATTTACTAGAGGATCAAAGCCAGCTCGAATCGGGCTGCTTGAGCTTGCACGAGTCAGGGCCATATGGTACTTTTGTAGGAGTTTACGATGGGCATGGGGGCCCCGAGACATCGCGGTTCATCAATGTTCAACTATTTCAACATCTCAAGAGATTTGCTTCAGAGCACCAATCCATGTCATTGGAGGTAATACGAAAGGCATTCCGAGCAACAGAAGAGGGCTTTACCTCT…
>F01_transcript_101619
ATGGGTGATTATCGTGACATATTAAGCCTTACTAGAGTTCTCATGCATGGTCCAGAAAGCAAAGTAGATGTCGACGCTGTTATAGAGAGGTTGAAAGTCTTCCATTTGCATCTTTGTTGGGGTCCTGGAGATTCATCTCAAAATGCATCAGCAGCTACAGTTGGCATAATTAAGGCTACAACAGTGAATTTGAGAAGTTGGACAGCCTTGTAA
>F01_transcript_101620
ATGGGTTTGTCATCAGCCACCTCTAGTAGTGAAGCGTTGAAATTGTGCATATTTGACTTGAGACGTGGACAGCATGAAGGACAGGAGCTGGACAAGATTTTATTTTTTTTTCCTGTCGATATGCCATTTTCGACACAACTTTCTGTGATAGGGCTCAGTGAGGGACTTATCACATTTACAAGAATTTTCTCTCCAGAAGCAGCTTGTGAGGTCATAGAAGCAGAGATGCACTCTCATATTTTTTACGAGGCAGAGACAGATATCTGGATGGTATTGGTAATTGAGAAAAGTAAGGAGACAGAAGCCATATGGCGCAGTGATGCATTGCGTAGAGTTCTTAGGGAAATACACTCTCTTTTTGTGATGTTTCATGGATCTATAAGAGCATTGCTTGATAGA…
>F01_transcript_101623
ATGGAGAAAGAAAAGGTAGATGTGTACTCTCCTACGGGAGTACTTGAAGACTATTTAAAGAGTTTAGAATCCGAATCAGTCTCTTCAAAAGAAAGCACTTCAGAATCCGAAGATCAATCAAAACCCTCTTCTCGATGGGCTGGTTTTGTCGAATTACTGAAATTTAAATCAAAAAGACGTTTAGGCACCTTGCATCCTCTTAAACTATCCAAAAGATTTAGCACAAGTATGAGAGAGGAAATCACATCGGCAAGTGAACATGTCGATTCTGATTTGAACTATTTTAAACCTCACTGGAAGAATTTCACCCTCTCGCAACTACAATCTGTAACCAACAATTTCTCCCATGAAAATCTTATTGGAAAGGGGGGTTATGCTGAAGTTTATAAAGGGTGTTTG…
>F01_transcript_101626
ATGAGAGACCCTGTATACGGTTGTGTTGGGGCAATCTCTTACTTGCAGAATCAAGTATCTCAGTTACAAATGCAGCTAGCAGTTGCACAAGCAGAGATATTATGCTTCCACCAGTTGCACAAGCAGTTTGGTGATAAATGTCATTTTGCCCATGGTGAATGGGAACTTGGCAGGCCAACAGCTCCATCCCATGAAGACCCTGGTGCTATGGGACCAAGGCAAGGCAGTAGGTTCGGTGGCCACATGGAGCCAACCCCGCCAAGTCACACTATAATTTTATGCATGTTTAGGTAG
>F01_transcript_101628
ATGCCTGAATATAATCCAGTAGCCAAGATATCCATCATTCCCCGTGGCCAAGCGGGTGGCCTTACCTTTTTCGCTCCAGGTGAAGAGAGGCTTGAATCTGGGCTTTATAGCAGAAGCTACCTGGAGAATGGAGAGATTCATGAAACTCTGATGAAGCACACACATGAAGTTGTGGATGAATGTACGTATTTTGGGAGAACCTAG
>F01_transcript_101629
ATGTTCACGATTTGTTTCGCTGAGCATGTCATTCATCAGAAGTTTGATCAAATTCCTACTCCATTTCCCATCGCGCAGTATCGGAAGAAGTTATGCACAAACCTATATATGCATTCAAGGAGCAAACAGTTGGAGGGATATGAGACTGACAGAGAATTTTCAGGAAGATTTGTTCCAGATTTTGTTTAG
>F01_transcript_101630
ATGGAGTTCACTTCGGATCCAAAACCCTCAGAAGAAGAGATGATTAACTCGTATGTCAAAACCCTAGCTTCGGTTACTGGAAGTGAGGAAGAGGCGAAAAAGAAGATCTACTCTGTTTGTACATCGACATATACTGGATTTGGTGCTTTGATTACTGAAGAGCTTTCCTACAAAGTGAAAAGTAGAGATGCATTGGCAAAAATTGTGTACTCACGATTATTTGACTGTTGTTTCTAA
>F01_transcript_101631
ATGAGAAAGGCAATTGCCGTAGCTTCATCGGACCATGGACACAAACTTAAGGAACGAAGAGACGCAATTGTGCAGCGACTCTATGCCTGCCGGAGCTGCGACGAAGTTAACCGGCAACAAAATTTTCCTGCGATTTGGGGAGATAATGAAGCCAAGGTCAAACACTCGCCTTATACTCCGCAATCGGTTCACAAAGACGAAGATGTTGACATTGAAAACGAGGATGAGGAACCAGATCCCTTTGGAGGTTTATTTGATGATGAGGAAACAAGGATTCTCACAATTAAAGAACAGATTGAAGATCCTGAGCAGTCTGATGAGTCTCTGGTGGAATTGCTTCAAGGCCTTTCTGATATGGATATTACATTCAAAGGTCTCAAGTATGGTTGCTCAGACCTT…
>F01_transcript_101633
ATGAGTTTTGTCTTCCGAGGGACTAGAGCAGATATAGAAACTGGGTTTCCGGGATTTATTCCTGAAAGGCGTGCAGTGCGCGGTCATGCAGCTCGACCTTTTAACATGAACTCTCTTGCTTTTCTTGTCACAGTTCTTTTGCTGTTCATGATTCTAAACTCTAACCAAATGTCACCGAACTTTCTGCTCTGGCTGGTGCTTGGTGTTTTTTTGATGGCAACAAGCCTTAGGATGTATGCTACTTGTCAGCAACTTGCTCAAGCTCAGGCTCATGCAGCGGCAGCCAGTAGCCTTCTTGGCCATACTGAACTACGGTTGCATATGCCACCATCGATATCACTTGCAACAAGAGGGCGATTGCAAGGTCTCAGACTCCAACTTGCACTCCTTGATAGGGAA…
>F01_transcript_101637
ATGTCACGAGGTATGCAGAGGGCAGTTGCACCTCCCCAACCACCAAGGCCAACTGATGTGGCGAATAATATCCCTGCTGCTGCAAGACTAGGGATTGAGAATGCTTCTTTGGCAGGAAAATCAGATGTTTCTGGCACAAAAGAGGATACGGATCAAGAGGATGCTTGTGCAAAAGTGGTCGTAGTTGAGTATGCCACTACAGAAAGGGTCATGGATCATAATGTTACAGAATTGAGAACCGAAACTGATCAATCACAACTTAATAAGCTGGAGGCAATTGAAAGTTTTCTTTTGGTTTATAGCAATGAAATTTGTTCCATGTGCGATTTGGAGGTAGACACAAATCCTCAGGATGCATGTTATACCATTGCTGGAGAATCATACAAACTGTGGTTACAG…
>F01_transcript_101638
ATGTTTGGTTATGAAGAACATCCATATGCGTTTTATACCATGGCTGTTTTAGCAATTGTTTTGGTGGGTTTGCTCTATGGATTCTTCATAGCAATAATATGTGGACAGAGGATCAGTGAACGCCACTACCATGTTCTTGCCAAGCAAGAATTGACAAAGGAGTATATAGTAGAAGATCGAGAAGCTAACAAGAATGTTGCAGAGCTTGAAGCCAGCCATATTACAGAGCTAAGAATGTTGGGGCTCTATTAA
>F01_transcript_10164
ATGGCAGGAGATACAAGTGGGAAATCAAGGGAGCTTGATCAAACGCCTACATGGGCTGTTGCTGGTGTTTGCGCTGTTATAATCATAGTTTCTATTGCTTTAGAGAAGATTCTTCACAAACTTGGAGCGTGGTTTACAGAGAAGCACAAGAAAGCTCTATTTGAAGCTTTAGACAAGGTTAAAGCTGAGTTAATGGTTCTTGGTTTCATTTCGCTAATCCTGACATTTAGTCAGTATTACATTGCCAAAATTTGTGTCCCGCAAAGCGTTGCAGACACAATGTTGCCGTGTGCTGCTAGAGATAAAGGTGATGGTAAAAAAGAAGATGAGGAACATCGGCGGAGGCTTTTATGGTACGATCACAGATCATTATCTGTTAGTTATGAATCTAAATGCAAA…
>F01_transcript_101640
ATGCAAGATGCCTACTACGATGAGGAATTGGGAGCTGTGATAGATGATATGTTTCTACAAGTCCACATGCTAGGTGGAGGAATAATTGGCCAAGCTGCTTTCACTAAGAAACATAGATGGATGTTCTCAGATGCTCATTACGAGGGACAGACTTTTGTTGGATCAGTTGGCAGGTTGATATCTTGCTGA
>F01_transcript_101642
ATGCAAATGGTGCACCTCTTTCTAATTTGTTTTACTGTTAGTTTCTGTCTGAAATTCACATTTTCTATATTGACACTTCAACTTCAAACCCATAGAATTAACCTCTTTACAGTGCCATGGGTAGCATTATCTCTTTTGTCTGGGCAGCCCAAAGAAGGTGTTTTAGTTGAAGCCCGATCAGAATCGAAAGGCTACTATGAGGAGACACTAACAGATTCATCGGGAAGATATCGCCTGAGAGGTCTGCTCCCTGATACAATCTATGTAATCAAAGTTGGGAGGAAGAGTGAACTTGATAACATTCAAATTGAACGTGCATCTCCTGAATCTGTTGTTATTGAGATTGGATTCGAGGATGTCAAGGGTTTGGATTTTTTGGTGTTTGAAACACCAGAATGA
>F01_transcript_101643
ATGGATTACTCCTTCGATTCAAATGTCTCAAAGTCACCTTATGTTCTATTGCTCAAAGTGGCCACTCTCATACCAATTTCTCACTACTTGTTGGGATTTCTATTCATTTTTGTCACTTTTTTGTACAATTTTCTGGAGATCCATTTTCTTCAAGATTTTTTCAGTGGGTTTAGAGGGCAATCTGTGTTGTTGACTTTTAATTCTTGCTCAGAGCTCTACGAGGAAGTTGCCTCAAAATGTCAAATTCTTCATGGAAGGTATTTGGCAACGCCCTGGCTATCTAGCCCTCATTTTCAAACTGTTTTCTTAAGTTTCTTTGGGAGGGCTCCTTCTCTCAGATACAAAAGAGAGCTATTTAGAACGCCTGATGGTGGAACGATAGCTTTGGATTGGGCGATG…
>F01_transcript_101644
ATGTTGGCGCCCGGCCGGCAGACCCCTTTCTTCTTCTCGGTTATTGAGTATATTCAGTTTCTGCAAGAAAAAGTGCACAAGTATGAGGAACCATACCAGGGATGGAACCACGAACCACCAAAGTTGATGCCATTGGAACAGAAATCTTGTGCATGA
>F01_transcript_101647
ATGCTTGCCCTTACCGGTAAGGCCGTTGAAGGTGACATACTCACTGCTGTTGAAGTAATTCCAAAGAGTGAACCACAACAGCATGTTTGGGGCAATTACAAAAAAGACGTTAGATACCAGTGGTTTTGTTCATCTGAAACGGGAAATAGCAATTCCTTTGAGCTATTACCATCACAACGTTCTTGCTCCTATAAATTGCGTTTGGAGGATATTGGTCGGCGGCTGCAATGTGAATGCATTATGACCGATGCGTTTGGAAGGTCAAGTGAACCAGCGTATGCGGAAACAGCTACTGTTTCACCAGGGATTCCTAGAATAGATAAGCTGGAGATTGAGGGTAGAGGTTTCCACACTAACTTGTATGCTGTACGTGGCATCTATAGTGGAGGGAAGGAGGAA…
>F01_transcript_10165
ATGGAGATGAAACCGAAAACGAAAATAGTGTGCACGTTGGGTCCGGCATCAAGGTCAGTGACTATGGTGGAGAAGCTGTTGACGGCTGGGATGAACGTAGCTCGATTCAACTTCTCCCATGGATCTCATGAGTATCACCAAGAAACCCTCGATAATCTCAGGGCCGCAATGGATAATACCGGCATCCTCTGTGCCGTCATGCTCGATACCAAGGGTCCAGAGATTCGCACTGGATTTCTTAAGGATGGGAAGAATATTCAATTGAAGCAAGGTCAAGAGATCACCATCTCAACTGATTATAACCTCAAGGGTGATGAAAACATGATTTGTATGAGCTACAAAAAGTTAGCTGAGGATGTGAAGCCACAGAGTGTGATACTCTGTGCAGATGGTACTATC…
>F01_transcript_101650
ATGGATTTTGAACTGAGAAGAGCGAGAGAGAAGCTAGAGAAAGAACAGAAGGACAGGAAAGAGAAGGCGAGATTGAAAATGGAAAGAGAGAGAAAAGCTAAGCAAGAGGCTATTCGACAGCGGGAGGCCATTGAAGCCGCTCAGAGATCTCGTAGGATCGATGCTATGGAAGCCCAACTGAAGGCAGATCAGCAAATGGAAGAAAATCTACTCGCTGGAAGAGGAATCATGTTTAATCGTGTCTTAAAAGCCGCATCCTATCAGGGCTTTGGAGATAAGATAAAATTACCATCATCCTGCTTCACGGAGTTGTCTGAGCAAGGTTCGTTTGACAAAGGGCCTTTACACTTCCAGTTGTCTGTAATGCATCATGAGGATCTTTTAGACGCGGAAGGTGCT…
>F01_transcript_101652
ATGGATCCAATTCTAAAGAGGAGCAGCAAGGAGTCGGGGAACTCACCCGATTCAACTCACCTTGCGCCATTCCCAGATGAGGTACTGGAAAGAGTACTTGCCCTGGTAAAATCCCACAAAGATCGAAGTTCAGTATCACTGGTATGCAAAGATTGGTACAATGCTGAGAGGTGGAGCAGGACCAGGATCTTCATCGGAAACTGCTACTCAGTCTCGCCGGAAATTGTGGCGAGGCGATTTCCGAATATTCGGAGTGTTACTTTAAAGGGGAAACCAAGATTTTCTGACTTCAATTTAGTGCCACAAAATTGGGGAGCTGATATACATTCATGGCTTGTAGTGTTTGCTGAAGTTTACCCACTTTTGGAGGAGTTAAAATTGAAGAGAATGGCTGTGAGT…
>F01_transcript_101654
ATGGCATCATCATGGGAACATTTAGGGGATATTGCGAATGTTGCCCAGCTAACTGGCCTTGATGCTGTCCGGCTAATTGGGATGATTGTTAAAGCAGCAAATACAGCTCGAATGCACAAAAAGAACTGCAGACAGTTTGCGATGCATCTGAAGTTGATTGGGAATCTGTTAGAGCAGCTTAAAATCTCAGAGCTAAAAAGGTACCCTGAAACCCGTGAGCCTTTGGAGCAACTTGAGGATGCATTGAGGAGGTCTTACATCTTGGTCAATAGTTGTCAAGACAGGAGCTTTTTTTACTTGCTTGCCATGGGCTGGAACATTGTGTATCAATTCAGGAGGGCTCAGAATGAAATTGACCAATACTTGAAAATCATCCCTCTCATCACTCTTGTGGATAAT…
>F01_transcript_101655
ATGTCCGAGAAGAGGGCCCTCACTAAGTTTCTACGATGTGTTGAATGGAGTGATGTTCAGGAAGCGAAGCAGGCAATAGAACTAATGGGTTGGTGGGAAATGATTGATGTTTGTGATGCATTGGAGCTTTTATCTCCTGTTTTTGAAAGTGAAGAGGTCCGTGCATATGCTGTCAGAGTTCTTGAAAGAGCTGATGATGAGGAACTTCAGTGTTACCTACTTCAGTTGGTTCAAGCACTTCGGTTTGAGTGCTCTGATAAATCTCGCCTTTCTCATTTCCTTGTGCAACGATCATTGCGCAATATTGAGTTGGTTAGCTTTCTCCGATGGTATGTTGCTGTGGAACTTCATGATCCAGTGTATGCAAAACGTTTTTATTGTACCTATGAGATACTGGAA…
>F01_transcript_101656
ATGGAGGAGGCTGGTGCTTCCTTGGAAACACTTGCTAAAGGTGCAGTGCAATTTTCTCAAAAATTCACTCTTCAAGAACTGGAAGAACACTGGCATTCTCTTCCGAATGATCCAGATGTTTCTGTGGAGGCATCTGGTCAAATTAAGGGGTGTGAGCACTCTTCATCTACTCTGTCGCCAAGCTCACATATTTTGGAATTTAAAGGAGCTGAAAAATCTGAGCCTGTGAAGAGGAAGAATGAAATTATGGGCAACTGTTACCATGCCATGCTTAAAAGAGTTCGAAAAAATGGTGGTCAAAATGGAGAGGAGCCTCCATCTGCGGATCACATGATTGGAGAAGATGAGGCTGTTGGTGCTACTGTTGCAACTCCTGCTGATGTTACTTCCGATGCATTT…
>F01_transcript_101659
ATGTTCAAGTATGATAGTGTTCACGGTCCCTGGAAGCATCACGAACTAAAAGTTAAGGATGAGAAGACCCTTCTCTTTGGTGAGAAGCCTGTCACCATCTTTGGTTCTAGGAACCCAGAAGAGATCCCTTGGGCAAGCACTGGTGCCGAGTTCGTTGTTGAGTCCACTGGAGTTTTCACCGACAAGGATAAGGCTGCTGCACATTTGAAGGGTGGCGCAAAAAAAGTCATCATTTCTGCCCCTAGTAAGGATGCTCCCATGTTTGTTGTAGGCGTCAATGAGAAGGAATACACACCAGACCTTCACATTGTTTCTAATGCTAGTTGCACTACCAACTGTCTTGCTCCCCTTGCAAAGGTGATCAACGATAGGTTTGGCATTGTTGAGGGGCTCATGACA…
>F01_transcript_101660
ATGGTGATGGAGGCCTTCCAGCAAGGTCCACGTATCCGCTTCAACAAGGATGGCTCGCTTTTGGCAGTCTCTACCAATGAAAATGGAATCAAAATTTTAGCGAATTCTGACGGTCTTCGATTGCTACGCACATTTGAAAATCAATCTTATGATGCTTCAAGGGCTCCTGAGACTGTGAAGGTGGCTGACTTGGAAAACTTGATTCTTGCACCCCTACATAATGGAGATTCCAGAAATTTGGGGGACATTAAGCCGAGAATAACTGAAGAATCCAATGACAAATCAAAGATTTGGAAACTTGCAGAGGTTAATGAGACTTCTCAGTGCCGGTCAATGAAGCTCCCTGAAAACATGAGAGTAACTAAGATATCAAGGCTGATATATACCAACTCCGGTAAT…
>F01_transcript_101661
ATGACATCAAAACGTGAAAGTAATGTTGTTGGAAAATTTGAGAGGATGTGCAACGGAAAGATGGCAGAAAGGCACTTGCATTGCATCAATTGGGCTGTGTATTACTTGAAAGAAAAGATTATAAAGATGCTGAATGCTACTTCGAGGCAGCAGCTGAGAATGGTCATATTTATTCTTTGGGCTGGTGTTGCTAGGATTAAGCACAAGCAAGGGCAGAGATTTTCAGCCTATGAGATTGTTAACACACTTATTACTGAGTATAAATCAATAGGATGGATTTATCAGGAGCGATCTTTGTATAATGTGGGAAGGAAGAAGATTTTGGATTTGAATGATGCAACTAAATTGGATCCAACACTTTCTTTTTCCATACAAGTATAG
>F01_transcript_101662
ATGAGTTTTTTCAGAGAGAATTGGCGGAAGAGGGATACTCTGGAGTTGAAGTCAGAGTCACTCCCTACGGTCACCGACATCATCATTCGCGCAACCCACACACAAGAAGTTCTCGGCGAGCAAGGACGACGCATTCGCGAGCTGACCTCCCTCATTCAAAAGCGATTCAAGTTCCCCGAGAATTCAGTTTCCCTTTATGCGGCCAAAGTCCAGAACCGTGGTCTCTCTGCCGTCGCTCAGTGCGAGTCCCTCCGATATAAACTCCTCAACGGTTTGGCTGTGCGACGTGCGTGCTATGGTGTCCTTCGATTCATCATGGAGTCCGGTGCGAAGGGTTGCGAGGTTGTTGTTTCTGGAAAGCTCCGTGCTGCTCGTGCCAAGAGCATGAAGTTCACCCGA…
>F01_transcript_101666
ATGTCTCCTGCTAAAGTTGACAATGCAAAAAAGAGCGATCCAAAGGCTCAGGCTTTGAAGGCTGCTAAGGCTGTCAAGGGTTCATCAACATTCAAGAAGAAAGCTAAGAAGATCAGAACATCTGTTACCTTTCACCGGCCGAAGACATTGAAGAAGGACAGGAACCCAAAGTATCCCCGTATCAGTGCGCCTCCAAGAAACAAATTGGACCATTATCAAATACTCAAATATCCACTGACCACAGAATCTGCTATGAAGAAGATTGAAGATAATAATACCCTTGTCTTCATTGTTGACATCCGTGCTGACAAGAAGAAGATAAAAGATGCAGTTAAAAAGATGTATGACATTCAAACCAAGAAAGTGAACACTTTGATCAGGCCTGATGGAACCAAGAAG…
>F01_transcript_101669
ATGAAATATTTGTCCTACCTTATAAAAGTTTTGGACAAGCTTGTTGTGGTAAAGAGCAATGGTGATCTAGATACAAAGATGGGTTTTGATGGGGCAAAATACCCGACCCTTGATACAGTCGGTATTGGATGGATACAAGTATATTTGCATATGGCCAAACTGGTTCTGAGGCAACTGGAGACAGACTTAAGGAAGCACAATATATATAAACAAATCTTTATCTGCCTTTGGAGATTTCATCTTTGCGTTGGACCTAGCTAA
>F01_transcript_101674
ATGAGAGACCCTGTATACGGTTGTGTTGGGGCAATCTCTTACTTGCAGAATCAAGTATCTCAGTTACAAATGCAGCTAGCAGTTGCACAAGCAGAGATATTATGCTTCCACCAGTTGCACAAGCAGTTTGGTGATAAATGTCATTTTGCCCATGGTGAATGGGAACTTGGCAGGCCAACAGCTCCATCCCATGAAGACCCTGGTGCTATGGGACCAAGGCAAGGCAGTAGGTTCGGTGGCCACATGGAGCCAACCCCGCCAAGTCACACTATAATTTTATGCATGCTTAGGTAG
>F01_transcript_101675
ATGCAGCTCTACTTTAATCCTGCGACTGTGAAGATGCTGAGCAATCTAAAAGTCTTGGTAATTGCTATCTTGTTAAAGATGATAATGAAACGGCGGTTTTCCATAATTCAGTGTGAGGCTCTTGCTCTTTTGCTCATTGGCATTAGCATTAACCAAATGCGTTCGCTGCCTGCGGGTACTTCTGCTTTGGGTCTTCCTGTTGCAACTGGTGCATATATCTATACTTGTATCTTTGTGACTGTTCCATCTTTGGCCTCAGTCTACAATGAATATGCGCTGAAGAGTCAATATGACACAAGCATTTACCTTCAGAATTTATTTTTATATGGATATGGAGCCATATTCAACTTTCTAGGCATTCTTGGAACCGTTATTTATAAAGGTCCCGATAGCTTTAAT…
>F01_transcript_101678
ATGGTTGCTTTTGGGAAAAAATTGAAGGAAAGACAAATTCAAGAATGGCAAGGATACTACATCAACTACAAGTTAATGAAGAAAAAGGTTAAACAATATGCCCACCAGATTGAAATTGGAGCACTAGAACGTCGACATGTTCTCAAAGATTTCTCCAGAATGCTGGACAACCAGATCGAAAAAACTGTCCTTTTTATATTGGAACAACAAGGGCTATTTGCAAGTAGGATCGCTGTACTAGGAGAGCAGCAGGAAGCTCTTCAGGAGCAACCAGATATATTTAAAATATCTGAACTACGAGAAGCATATAGAGACATTGGGAGAGATCTTTTAAAGCTTCTCTTTTTTGTTGAGATTAATGCCATTGGTCTGCGCAAGATCCTCAAGAAGTTTGACAAA…
>F01_transcript_10168
ATGACTCTGGTTGAGGTAGAAGGGACTCATACTCTGCAGAACACATACGATTCCCTTGACATCCATTTGGGGCAATCATACTCTGTATTGGTCATTGCTGATCAGCCTGCACAAGATTACTACATTGTTGCTTCGACGCGATTTACATCCCAAGTGCTCACAGCTGCATCCATATTTCATTACAGTAATTCAGCAGGCAGTGTTTCTGGTCCTCCCCCTGGTGGGCCAACGACCGAGGTTGATTGGTCTCTTAACCAGGCACGATCTGTCAGGAGGAACCTGACAGCAAGTGGACCAAGGCCCAATCCTCAGGGATCTTATCATTATGGATTAATAAACACAACCCGTACTATTAGACTTGCAAATTCTGCTCCAGTCATCAATGCCAAACAGAGATAT…
>F01_transcript_101680
ATGTACACATTCCAGTTAAAAGGGGTTGAACCACCAGGTTTTTCATTTCAAATTGTAAATACAAACATGGATGAGTTGAGTCCTCGTGCCCGAAGACGAAGTGCTTTGCTCACATGGCAGCATATTGCATCATTACCTCCTAGCTTGCCTGTTATATATTGTGGGGGATTTAACACACAAAAGGAATCAACTACAGGACGTTTTCTTCTAGGGAGATCAAGAGAGCATGGTGTTGTAGGTGATATGAGAGATGCATGGGCCAATGCTCGGGTGAGGAAGAATGTTTCTCTCATACACACTTATCATGGGTTTAAAGGTAACAAACAAGGAGCTGTTGAATTCCTCAAGTTAATTTTCAGAGCATTTTGCCTCTGCTGGGATCGCCAAACTCAGGACTTG…
>F01_transcript_101681
ATGATTATTGCAGAGTTGCTTACCTTCTACAAATTTCATGGGGATGAAATCCCAATTGTGCGAGGTTCGGCTTTGTCTGCTTTACAAGGGACAAATGAAGAGCTCGGGAAAAAGGCAATATTGAAACTAATGAAAGCCATGGATGAGTACATAAATGAACCTATTCGCCAACTTGACAAGCCTTTCTTAATGCCAATAGAAGATGTCTTTTCAATTCAGGGTGCACTGAAGACTACAGTGACTGGTGTTGAGATGTTTAAGAAAATCTTGGATCACGGACAGGTAATTGACAACTTAATTTCTAGCCACGTTTTAAGTAGTTGA
>F01_transcript_101687
ATGGATCTGTTTCGAAAAATTCTGCGTGAAGGTTTGAAACCCACAACTGTAGATTACAGCACTATTTTGCATGGACTATTTAAGATGGGTAGATATGTTGACGCACCAAATTTATTTAATGAGATGCAGGCTCAAGGTCATAGACTAGATATTTTGACATGCAACATCTTGTTAGACGACCTTGCAAGAACCATTATGTGGATGAAGCATTGTCTTTGTTTCGTGCGATTTCCTGATATTGTTACTTATAATGTTCTCATTGATGGATTGTGCAAAGATGGAGAGCTTGATATGGCAAGAAATCTTTTTGATAGCCTTCTTTCAAAAGGCATGCGACCAGACATGTCTCTCTATCTTCAAATTCCCTCCCTTGTTCATCCCATGGATTAA
>F01_transcript_101688
ATGAAGTTTTATTTTCTTTTCTTTTTGCAGGCTGGTGCTTCTCTTGAAGCACTTGCTAAAGGAGCAGTGCAATTTTCTCGGAGATTTACCTTTCGCGAACTGCGAGACCGGTGGCATTCACTACTTTATGATCCTGATATTTCAACTCAATCTTCTGCTCGGATGATGGAGCTTGAACTCTCTTGTTCAAATCCTTCATCAAAGTTCAGTAGGTCTGACAATTCTAAGAGTGGAGAGTTCACTGGAAAAAGGAAAATTATAAGCATTCGTAGACAATATAATGCCATGCGGAAGAGACTTCGAAATGAGCTTTTTAACTCTACTGATATAGGTTTTCTTGAACCCAATCTACATGATTGCGGTGGGCGTGCAGGTGATTTTCAAGAGCATGTAACACTT…
>F01_transcript_10169
ATGCAGCAAAACGATATGAGCTCTCCATATTTCCAGTACTATCAATCCCACCTCCAAAACCCTAATACTAATTCCATCGATCCGCTCTTCAACAGTAATTACAATCCGAATCCTTTGCCTACTACTAGTATTTCACAAGCTTCTGCTCCTCCGGTTTCCTCCAATTACTCTACATCTGATTACTCCAATTACTATGTCCCTCCGTACCCACAAAACAATACCGATCATGTATATTCAAACCCTAATTTGCAACAATCAGATGCCTCTAATTCACCTTACTCCTTTACAAATCAGCCCACCTCGTATTATCCATACGATCTGAATCAAGCTGCGGTGAGTTATGATCCAAATTCATCGTTCACATCGACTTCGTATTCACAGGGTTTGTATAATGGTTCA…
>F01_transcript_101691
ATGGAGAATTTGACGACAAAGCTTGGTCAAAAAGGCCTAATCAAGAGGCATGAGTTTATTAGAGTTATTATTCAGTGTCTTTATTCTTTAGGATATGGAAAGTCAGCTGCTTGTTTGGAATCAGAATCAAGTGTTTTGTACAAGTCTGCTGAGTTTAAATTGCTTGAATCTCAAATTCTTAGTGCGAATTGGGATGATTGCGTTGATAGTCTTTATGGATTTACGGATTTGACAGATGAAACAAGAGCTTCGACCTTGTTTCTTGTCTTCAAGCAGTGCTTGTTAGAGTTTTTGAGCCAAGGGGATTATTCAATGGCGTTGGCTCTTCTGCGGAAACAGATTTCCACTTTAAAGGTGGGCAAGGAGAAGGTTCATAAACTTGCTTTTGGGATGCTTTTG…
>F01_transcript_101692
ATGTCTAAGAAGATGAAAGGGGTTGCTTTCGATTCCTCACCTTATGGTGTATATGGCAATTCTAAGACCATGTTCAAGAATCAGACTCTGATGCAAGATTACCAAGAGTTGCACAAGGATGTGGAAGCCTCAAGGTACAAGTTGGGGAACCTGAAACAGAGGAAAGAGACATTATTTGCAGAAGTCCGATTTCTGCAGCAAAGACACAAATTCCTATTGAAAAGCAAGTCTGCGAAAGTCCCACAAGATCGAGTAAAAGAACACTTGCAACCACATTATGCAAAGATTAAGAAATTTCAGATTTCCAACAAAAAGGAGGCTACTCTGAGAGTTTACAAACCAAACCAGAAAGGAAGGGTACATATGGGAAAGGAAGTTTTAATCCAAAATACAGTTCCA…
>F01_transcript_101694
ATGGCAATGATAATTGGCAAATTGTTGTCAGGAGTGGTACTGGTGTTCCAGTTATGGAGTGAAGATGAAGATGGTTTTCCAATATCTTCCGCTGATAAGAGAAAAAGTAATTTCCCGAATACTGAAGAAAAAGCAGAAGTTAAAGATAAGGGAATAGACGAGGGAGCTAAGAAAAAGAAGGAAAAAGACGATACTGTTAGTAGCAAAACTGTAAAAAGAAAGATTCACGGAGATGGGGATCAGTTAAGTGATCATGAAACCAATGATAAGCTAGCAAGGAAGAATAAGAAGAAGAAAGTAAGGGGTAAAGACGAAAAAGTGAATGAATATGGTACTGGTAGCAACGATGGTATCGAGCCTGAGGAAGAAACGACCGTACACGTGGACCAGGCTGTGGCA…
>F01_transcript_101696
ATGGATCACGCCGCCGATGCTTTTCAGACCGACTTGATGACCATAACTCGGTTCGTGTTGAATGAGCAGTCTAAGTATCCAGAATCTCGTGGTGATTTTTCAATCTTGCTCAGTCACATTGTTCTGGGCTGCAAATTCGTTTGCTCTGCTGTTAACAAGGCGGGTTTAGCCAAGCTTATTGGACTTGCTGGTGAGACCAATGTGCAGGGTGAAGAACAAAAGAAGCTGGATGTGCTCTCCAATGAAGTTTTCGTCAAGGCTCTGATCAGCAGTGGCCGAACATGCATCCTCGTCTCTGAAGAAGATGAAGAAGCAACCTTTGTAGAGAAACCTAAGTGTGGAAGGTATTGCGTTGTTTTTGATCCATTAGATGGATCCTCAAACATTGACTGTGGTGTT…
>F01_transcript_101698
ATGATAGAATTCATCACACCAATTGTGAAGGCTACTCACAAAAGTGGAAGGGTGTTATCCTTTTATTCCATGCCTGAATTCGAATCATGGAAGGAAAGTATGGGGCAAAGTGCAAGTAGTTGGTCTACTAAATACTATAAGGGGTTGGGAACAAGCACACAAAAAGAAGCAAATACATACTTTCAAGATCTTAAAAAGCACAAGAAAGATTTTTTGTGGGTGGATGAGAATGATGGAGATTCAATTGAGCTTGCCTTTAGTAAGAAGAAGATTGAGGCAAGGAAGAATTGGCTCCGACAGTTTGAGCCTGGTACTTTCCTTGATCAGAAAGAGAAGCTAATCAAGTATAGTGACTTTGTCAACAAGGAGCTTATATTATTTTCAATGGTTGATCTTCAG…
>F01_transcript_1017
ATGTCTGTCACAGCAAAAGCTTTGGAACCTGCATTTCAGGGTGCGGGTCAGAGACTAGGGACCGAAATTTGGAGAATTGAGAACTTTCAGCCAGTTCCATTGCCGAAATCTGATTATGGTCGATTCTACTCAGGGGATTCGTATATTGTCTTACAGACAACTCCTGGCAGGGGAGGTGCTTATATGTATGACATACACTTTTGGCTAGGGAAAGATACAAGCCAGGATGAAGCTGGAACAGCAGCTATAAAGACTGTAGAACTTGATGCAATTCTTGGCGGGCGTGCAGTGCAGTACAGAGAACTTCAAGGTCACGAGTCTGACAAATTTCTGTCTTACTTCAAACCATGTATTATTCCGCTGGAGGGAGGTGTTGCGTCGGGTTTTAAGAAACCTGAG…
>F01_transcript_10170
ATGGAGCAGATCTCTCAAATCCAGGTCCCAAGATTTAAGTTGGGTAATCAAGGCTTGGAGGTTTCTAGATTGGGCTTTGGATGTGCTGGACTTAGTGGAATTCTAAATACTCCTCTGTCACATGAAGCTGGATGTTCAATTATAAAGGAAGCTTTTGTTAAGGGTGTTACCTTCTTTGATACATCTGATGTTTATGGATATAAGCATGATAATGAAATCATGATTGGAAAGGCATTGAAGCAGTTTCCTCGAGAACAAGTTCAGTTAGCAACAAAATTTGGCATTAATCTCAAACCTGATTGGAGTGAAGTCATTGTCAAGGGCAATCCTGAATATGTGCGGGAATGCTGTGAAGCAAGTCTCAAGCGACTTGATGTGGAGTACATTGATCTTTACTAT…
>F01_transcript_101702
ATGCTGAGGTTTGGAGATGCTCCTCATATGGATACTTGGGTCGAGATAGTAACTAGGATATGTGAGATGGAGGATGAGATTGTAAGAATGGAGGATATATTGAAAGAGGTTTTGAAGGTGGAGATACAGCCCTCACACAAGAATAATAGAGGCGGGTGTTGGTTTGGAAGAATATAG
>F01_transcript_101703
ATGGGTGAGGCAGTTGTGAGTTTTCTTGTGGAGAGGCTGTGTGATTTGCTGCATGAACAAGTAGAAGAAGTTCTACAAGGAGTTCGTGATCCAGTTGAAGAAATTATAGCTGCGCTGAGGATTTTGCAAGGCTTATTAAGAAATGCTGGAGCAAAGCGACATGAAGAGCGCATCCGAAATTGGGCTGCAGAGGTAAGAGAACTTGTATATGATGCAACTGACACTCTTGAAAGTTTGATTATAAAAGTTTCATCGGAGAAGAAAGGAATAAAAAATAGTGGTATTAAGGGAGATTTCAAGACTATTAAGAGCAGGATCTCTAAACTAATCACTTGTTCACGAATTTATGGCATAAGATCTTTGTCAGAAGATGATTCAAATCGGATTGCGTATAGGAGG…
>F01_transcript_101704
ATGACTAAGAAATGGAATTTTGCATATAGTACGCCGAGAAAGGGATTGCCTTTTCAGAATGCTGTTCAAGTGGAGGATTGTGGTGAGTTTGATGAGGTTGAAGCTCCAAATGCACCAAAGCAGTGGAGGATAGCTCAGTCTCGATTGATTGGGCTGAAGGCTAAAGAAGGGTGGTCAATGAGAGAATTATTTACGGAAATGGAAACAGAGATATGA
>F01_transcript_101707
ATGGATTATGATGTTGTTATTGTTGGAGCTGGACCTGCTGGATTATCGGCGGCTATAAGGTTGAAGCAGTTGTGCAGAGAAAAGGATGTTGATTTGTCAGTATGTGTTGTTGAGAAAGGTGCTGAAGTGGGTATGTGTCATTGCTCTTTTACTAAATACTTTTGA
>F01_transcript_101708
ATGATGGAGAAATATTATATTGGAGAGATAGATGCTGCAACTGTTCCCCTGAAACGCACTTACATTGCACCACAGCAAACCACCTACAATCCTGACAAGACTCCGGAGTTTGTGATTAAGGTTTTACAGTTTGTCGTGCCCTTTTTGATCTTGGGATTAGCATTTGCAGTTCGACAATACACCAAAGAAAAGTAG
>F01_transcript_101715
ATGATAAAAATAAATAATAACATGATGATGACCAAATCTGAGACGACGATGTTCAATGACGGTAGCGGCAGGAGGAGGATTAACTCCCTATCACGGTCGTCGTCAGGTTCATCAGGAAAACTGAGGAAAGATCCATCGTTGAGTGAGGAGGAGTTGAACAAGCGGGTGGAGGCATTCATCAACAAGTTCAATAATCAGTATATGGATATGATTAACCGTGGGGCTCATTAG
>F01_transcript_101717
ATGGGCCAGTGTTACGGAAAGACCTTACCTACCTCCGACGGACCGGGGGACGGCGATCTCGCTCCCCAGTCACCGCTCCCCTCCTCTTCCGTCAACGCTAATAACACTCCGACTCGATCCTCGGCAACCAATTTCTGGCCGAGTCCGTATCCTCAAGGTGGCGGTGCCAGTCCGCTTCCGCTCGGAGTTTCGCCGTCTCCGGCAAGGTCCACCCCGCGGAGGTTCTTCAAGCGACCGTTCCCTCCGCCGTCGCCGGCCAAGCACATCAAAGCTTCCCTAGCCAAGCGCTTTGGCCATGCCAAGCCCCGTGAAGGTCCGATTCCCGAAGATGGAGCCACGGAGCCTGATCGCTTGCTTGATAAGAACTTCGGCTACAATAAGAATTTTGGTGCCAAGTAT…
>F01_transcript_101719
ATGGCACGTCATATAATTGAAAAGTATATAACTGCAGGTGCGTCAATGGAGGTGAACATATCTCACCGAAGCCGGCAAGAAATTTTGACTACTCTTGATCTGGCACACCCTGATCTTTTCAGGAATGCACTCAATGAGATAGTGCAGCTGATGAAAATGAATTTGGCAAAAGATTATTGGTCATCAATGTTCTTTATGAAGTTCAAAGAAGAAGCCAATAGGAGAACAGCTGGAAATGAGGTTGGAACAGTTGAGTGGTTGGAATTTCTCTCCTAG
>F01_transcript_10172
ATGATATATGGAATTGATGCTGTTCATGGCCACAACAATGTCTTTAATGCAACAATTTTTCCACACAATGTTGGGCTTGGAGCTACTAGGGATCCTGAACTTTTGAGGAGGATTGGTGTTGCCACTGCCCTTGAAGTCAGAGCTACGGGGATCACTTATGCATTTGCTCCTTGCATTGCAGTTTGTCGAGATCCAAGGTGGGGTCGGTGTTATGAAAGTTACAGTGAGGATCCGAAGATTGTTCGAGAAATGACTGATATTATATTGGGGTTGCAAGGAGAGATTCCAAATGGTTCAAGAAAGGGAGTTCCATATGTTGCTGGAAAGAATAATGTTGTGGCTTGTGCAAAGCACTTTGTTGGTGATGGTGGGACAACCAAAGGCATAAATGAGAACAAC…
>F01_transcript_101721
ATGCTTGTTCTTAACAAACATCGTGCCGGGGTTGAGGTTTGCGCTGTCAAAGCTCCTGGTTTTGGGGATAGCAGAAGAGCCAATTTGGAGGACCTTGCAATTCTAACTGGAGGAGAGGTTATAAGTGAAGAACATGGTTTAAGTCTTGATAAAGTTCAATTTAACATCCTTGGTTCTGCAAAAAAGGTTACTGTTTCTCTTGATGACACAATAATTCTACATGGGGGTGGGGATAAGAAACAGATTGAAGAAAGATGCGAGCAGCTAAGGGCAACTATTGAGAAGAGTGCTGCAATGTTTGATAAGGAGAAGGCACAGGAACGGTTGTCAAAGCTATCTGGTGGTGTTGCAGTTTTCAAGGTTGGAGGGGCTAGTGAGGCAGAAGTTGGGGAAAGGAAA…
>F01_transcript_101722
ATGTTGGTTCCGGTTGGTGGGTTAGGGATGAATTCCACAATGGATGATATAAACCTAATTCAGCAGGCACAAAGACATCATCATTTAGTGGTTAGGGAGCTAGGAGAAGAGATTGATTTGGAAATTGGGCCGGGTGACGATGACCCTTCATTTGCGCACACCCCACTTATTGGTGTTGTTCCACCACGGGAATCTTCCGCAGATGAGCATGATGAGAGCAAGCAGATGTTATTGGTGTCTCATGTTCCCAGCGATGATCAGGATTTATCTAGGAGCCAACCCATGAAAAGGAAAAAGAAGGTTGTGAAAAGATGGAGAGAGGAATGGGCTGATACATATAAGTGGGCGTATGTCGATGTGAAGGAAGGGACGGCTAGGATTTTCTGCTCTATTTGTAGA…
>F01_transcript_101725
ATGGCGGGTCTTCAGATTTATGGGGTTTGGCTCAACAAGAGCCCCGCGCCAATATTTAATAAACAGCAGCCTCACAACAGAGCTTCTTCATCCACAGTTTTTGCAGCTTCTACTGCGGCTCCTCCTCCCCAATCTCCCTCCACAATTCAGATCGTTGGAGGGAACACTCCTGGTTGGTATGGAAATGGTAGTGTGCATTCTAGCAACAAATTTGAGGGCTGCCAAGAAGAATTTGACTGGATTGATCTCGACGCTGATCTATATCATTGGACAAAGACATTGCGCCCAGTTCAGTGGTATCCTGGTCATATTGCAAAAACTGAAAAAGAACTCAAGGAACAGCTAAAATTGATGGATGTTGTAATAGAGGTACGAGATGCAAGGATTCCAATGTCAACT…
>F01_transcript_101726
ATGGAGAAAAGAAAAACAGAAAAAGAATCAATGGCTGAAAAGAACACGAAGAAGACTGAGGGTTGTAGAGGAAACCAGGTCTTCGCTTCTTGCACTTTCGAAAGTCTCGGTCTTCGCCATTCCTTATGCAAACAGCTCAAAGACAAGTTGGGTTTCGAAGTTCCAACCCACATCCAGGCTCAGGCTATTCCTGTTATTCTCTCTGGGAAACACGTGCTTGTTAATGCAGCTACCGGGACTGGCAAAACCATAGTATATCTAGCTCCAGTTGTTCATCACTTGCTGGATTTTGATAAAAAAATCCAACGGTCTGATGGTACTTTTGCGTTGGTTCTTGTACCAACGCATGAATTGTGCATGCAGGTTTACGAAATCCTGCAGAAACTGTTGCACCGTTAT…
>F01_transcript_101727
ATGGCGGTTAACGTACAGCAGCAGCAGCAGAGTATGTGGCACGGAGTATTGGAGCTCACTAAATCGGCTCAAGACCGGGCCACTGACCCGTTGACATGGGCGCTTCAGCTCTCCTCTAGCCTTACGTCGGCTGGAGTTTCTCTCCCCTCCACGGAGGCTGCCAAATTCATAGTTAATCACATCTGTTGGGAGAATAATGTGCCAATTATGTGGAAATTTCTCGAAATGGCTTTGGCCATGAAGATTGTACCGCCTATGCTCGTTCTCGCTCTTCTCTCCGTTAGGGTAATTCCACGTCGAAGAAGCCAACCTACTGCATACCGGATTTATATGGAACTCCTTAAGAGACATGCATTTTCGTTGGCATCTCAAATTAATGGAACAAATTATCAAAAGATC…
>F01_transcript_10173
ATGGAGAACAGCTGTAGTATTAGTGATGATAAGCTGCAGCAGCCATTTCTTGTATCCCAAAGAGAAAGAGAAAGAGAGGTGGTCCACACCGAACAAACCCCGCCTTACCTAATTGAGCTCCGACCATCAAACAATTCCTTCACATCATCTTTCGTGGCCGATGCCGATGATATTGCCCCAATCACCGGAATACGAGATTTTTACACAGAATTCATGGTGGAGTCCCGCAAACTATGGTACCTGGCTGGCCCCGCCATCTTCACCAGCGTTTGTCAGTACTCCCTCGGCGCCATCACCCAAACCTTTGCCGGCCAGCTCGGAACGCTCGACCTCGCCGCCTTCTCCGTTGAAAACTCCGTCATAGCTGGTTTTTCTTTTGGAGTCATGGTAGGGATGGGT…
>F01_transcript_101730
ATGGCGGCTGCTTTTCAACAAGCTATTTGGAGCAATCGAGTGCATGGATATTGTGATGGTTTTGATTCTTATGAGGGGTTAAGAAACTATTCATTAAGATTAACATCAAATAGTTATGGTATCAGTATGAAATCTTTAAGAAAAGTACACTGGAGGTGTAACCACTTAAAGTTGTTTGTGGTACATTCATTAGTTCCAGATCCGGTTTTATCCTCCCTGCAGAGTAGTACTGACTATTCTTGGAAAATAGGAAACGAATCTACTTCGATCTTGATTCGACATGGGGAATCAATGTGGAATGAGAAGAACCTGTTCACTGGTTGTGTTGATGTGCCATTGACAAATAAAGGCGTAGAAGAAGCAATTGAAGCCGGTAAGAGGATTAGCTATATACCCTTT…
>F01_transcript_101731
ATGGATGTAAAATCAGCAACAAGAGTACCAGGAAGATCTGTGTTTGATCGAATTGGAGGAGGACCTTCTACGAAGAATGAGGTTTGTAAGTATTGGCTTGCTGGGAATTGCAACAGAAACCCATGTAAGTTTTTGCACCCAGAATCATCAGCCCCACAACCTAAGCAGTCCAAACTGGCCTGGAGGAATCCCAACTATCATACCCCCAAAATTGCTCAGGGGACCCAACCAAAAGTTATGAAGAGCCAAGGAGCATTTGGGGTTAAAGCTAGTCAAAAGTCCCATCAACAGTTATGCAAGTTTTGGGTCACAGGCAATTGTGTTCATGGTGATAAATGCAAGAACTTGCATTCATGGTTTTATGGAGATGGGTTTACCATGTTGGCCAAGTTAGAAGGG…
>F01_transcript_101732
ATGGCCAACCCGGCCGGTCTATCCGACCCCAACCAGAACTCACTAAACGGTCGGAACCTGTTAAGATACGCCGGATTCTTTGCCGGTGTCCACCCTCCCGACGCTACCAACTCCGTCGACGCCGGTAACGGAGACTCAGCGACTGCACAAGGCTCCGATGACTCGGGTAGCTCCGACTCGGTCGGCGACTCGAATCGGACGGCTGATTTGGCGGCGTGTCTCCGAGTCTTCTCCGAATCCATGTTGAGAATGGAACTTGTTGAGCTGGAATTGATCAAGGCCAGAGAAACCTACCGGCTTGAAGCGGAGAAGCGGCGATTCGAATCGGAGGCCGATTTGACTCAGACGATGCTGCAAACTCAGTTGCAGATTGCAAAGTTTCTTTCACGCTCGTGCACT…
>F01_transcript_101733
ATGGAGTCGTCGTCTTCAGGTGATGGGAGTGAAATTCAATCAGCACTAGTAGAGTGGACTGGACAGCGTACTGTGCCGAATGTGTTCATTGGCGGAAAGCACATTGGTGGCTGTGATTTAACAACGGCCATGCACAAGAGTGGGAAACTTGTTCCTTTGCTGACTGAAGCTGGAGCTGTTGCTAGCAAATCTTAA
>F01_transcript_101734
ATGGAACTTAAGGAATTCATGCTTAAAGTGTGCCAGGAGGAAAGAATACTACATGAATTGAGATCAATTTTGGAGGAACAAGCACATGATGTGGGTCTATTGATTTCTCAGCGTGTGGCAAATCTACCTCCTCAGCTTTTGCCACCACTGTGTGATGCACTTTTTGATGAAGTTTCTTGGGCAACAGAAAATGAGCTGACAGAGGATCTCCGAAATTCATTCTGCTTTAAGTCTTATCTGTTTGTCAGTAAGATATACAAGCATAAGAATGCAGACCAAAAACAGGCTCTGATGAGTAGCAGCACTGACGAAGCTTATGATATACGTTAA
>F01_transcript_101735
ATGTCTCTATCTGAGGGAGAATGGGAATGGCTGAGTTCTGTTACTGGCTATATTAAACTTTTTGTTGAAGTGACCAATGTCTTTACAGTTAATAAAAATCCAACTGCAAACATATATTTTCCTGAGATATGTGATGTATACATCCAGTTGATGGAATGGTGCAAGAACCCTGATGATTTAATTAGCTCTGTGGCATTGAAGATGAAAATCAAATTCGACAAATATTGGAACAAGTGCAGCTTTGTTTGGCAGTAG
>F01_transcript_101736
ATGAGAAACATTGGTCGGCAGCTGGAAGAGGCAACAATTGCTGATCTTCTTATTCGAGCTCCAGCAGGAGAAACAACAATTTACAATGTAGATGTAGTACGAGACCTAGTTGAGCAGTTTGTGAAGCAAGAGCAGAATGCACTGCCTGATTCTCCAGAAGAAAGTGAATTTCAGGAGATCAAAGGCACCAGGTCTATATCCAATGTATCCAAGATGAAGGTGGCTAAGCTCATTGATGGATACCTTGATGAAGTTGCTAGAGATCCAAATCTACCTCTGTCAAAATTTGTTGATCTTGTAGATATTGTGTCAAGCTTCTCAAGACCAACCCATGACGGAATTTAA
>F01_transcript_101737
ATGTATGATAATCTCGGGAACCAACCAAGGGTTTCAAGACCACCCACAAATGCACAACAAAGTCCATTTGGGAATGCATTCTATGGCGCTGGTTCAGGACTTATCAGAGGCGGACTGGGCGCTTATGGAGAGAAAATTTTAGGATCAAGCTCAGAGTATGTGCAAAGCAATATAAGTAGGTATTTCTCTGATCCCCAATACTATTTCCAAGTCAATGACCACTACGTGAGAAACAAACTGAAGGTCATTCTTTTTCCTTTCCTGCACAGGGGTCATTGGACAAGAATCACAGAACCAGTGGGAGGTAGGCTGTCATATAAGCCCCCAATCTATGATATAAATGCTCCAGATCTGTATATTCCATTCATGGCATTTGGTACCTATGTTGTTCTTGCTGGC…
>F01_transcript_101738
ATGGCTGCAATCAGAGCAACAACCAGCATGATTGTCAGAGATATCTTCCATCCATCCTTGTCCTTGGCATCTCTGCCCATGTTCCGTTCAATGTTGCCAAGCTTCGGCATCAACCTTCGCCTCGTGTCACGTGCCATGATGATTAGCTACAGTCCAGCTGTCCGGTGCGCCGCCGGCGAAGGAGGACGTACGAAGGCGTCATCAAGGTTGTCTCAGATTCAGCAGATATTGCATGAAGCTCAGGAAAGAGCTCTTTCTGCGGGCAACGAACCTATCCCCAAAATCACTTTAGACCATGTTACCGTGAGCTTTGCCAGAAGTGGGGGTCCGGGAGGTCAAAATGTCAATAAAGTAAACACAAAGGTGGATATGCGATTTAATGTTAAAGATGCACAATGG…
>F01_transcript_101740
ATGCCTGGTGATGTAGTGGTTGCCATCAAGGTTCTCGCTTCAAACTCAAAGCAAGGGGAGAAAGAGTTCCAAACGGAGGTATCTCTGCTTGGTAGGCTACATCACCGGAATTTGGTAAATTTGGTTGGATACTGTGTAGATAAAGGGCAACACATGTTGATTTATGAGTTCATGAGTAATGGAAGCTTGGCAACCTTTCTATATGGTAAGTTTGGGAATCCGCTTATTTGCTATTCTTCCTTTTTACTTCTTCATTTTAACAATTAA
>F01_transcript_101746
ATGATCATGTTGCATGGTTACCCTCTGGCCATGGTTGAGCATGTTGGATTCAAAATTTTTGTGAAAAATCTTCAGCCATCATTTGAGGTTATGACTAATAGTGTTATTGAGTCTGACTGTATGACAATTTATGGGAAAGAGAAACAGAAGGTGTTTGAGATGATACGCAATTTTCATGGCAGAATTAGCATGGCTGTTTGTATGTGGGTCTCACTAGAAAATGAGGAGTACTTGTGTTTAACAGCAAACTATGTTGATGAGGATTGGAAGTTGCAGAAGAAGATATTGAGTTTTGTAACATTGGATTCTTCTCATACTGATGATTCACTTTCAGAAGTAGTTATAAAATGTTTAATGAATTGGGAAATTGACCGTAAGCTGTTTTCGATGACATTTGAT…
>F01_transcript_101749
ATGGGTTTTCTTTCCGACCCACAAAACGGTGGCAGAGGAGGGGGTCAGGGTTTGTCTGGGTTTCAAAGTTTGATTAGGAGAAAGCAGGTTGATTCTATTCATATTAAGTCATCTCATGGTGGTCAGCAATTGGCCAAGGAGTTATCTATTTCCCACCTTATTGCCATAGGTGTTGGTTCAACAATTGGAGCTGGGGTTTATATTCTAGTTGGCACTGTTGCTAGAGAGCATGCCGGCCCGGCCCTTGCTATTTCCTTCCTAGTAGCTGGAATAGCAGCTGCTCTTTCTGCATTCTGCTATGCGGAGCTTGCAAGTCGATGTCCGTCAGCTGGGAGTGCCTATCATTATTCTTATATATGCATTGGGGAAGGTCTTGCTTGGTTAGTTGGATGGGCTCTG…
>F01_transcript_101752
ATGTTTGAAAAAGTAAAATCACTTCAGCAGAGGTATCCTACAGTCCACGTTATGGGTTTCCAGTCTAGCAAGTCCATTTTCTCTGAAGCTATCAATGTGCAACTACTCCAGATTATTATGAGAGAATTCATCTCATTTCCCATTTTATTGTCGACTAATAATTTTTCTGAGATGATAGATGGGGCATGTTACGTCATATTTGAAGGTTTCAAAGATCCTCAAATCTTGTATGAGAAGGACGTAGATCTTGGAGTTATTGATAAAGCCATCAAAAAGTTAAATGTGCAACAACACAATGAGAAGCCTGGGTTGGTACATACATTGGAAAGCACTTGGGTAAAGCCAGTTCAAGTCATTATGGAACCATATCATTGTTCTTCTTTGCGGAACTTACTTCTT…
>F01_transcript_101755
ATGGTTTGCAAATTGACAAAATCCATCTATGGACTCAAGCAGGCATCTCGTCAGCGGTACTTCAAATTTCATCAAGTCATTGTTTCATATGGTTTTGAAACAAATATTGTTGATAATTGTGTATATCACAAATTCAATGGGAGTAAACATATTTTCCTGGTTTTATATGTCGATGACATATTACTTGCCACAAATGACATAGACATGTTGCTTGACACCAAGAGATTTCTATCAAAGAACTTTGAAATGAAAGATCTTGGTAATGCTTCTTTTGTGTTAGGAATTGAGATACACCGAGAACGTTCTCGACATATATTGGGTTTGTCACAAAGGAACTATATTGAGAAAGTTCTCAATAGGTTTAACATGCAAAATTGCAAATCAGGTAAAACCCCGGTC…
>F01_transcript_101758
ATGCATCATCAACTTGGTGATGATGGAAAAAATTATCTTTTGCCCAATGAACTATTGTCTGCTGGAGTACTTAGAAGTGCCAATTCAATGTCTGTCATTGAGAGCTCTATGAATAAGAATAAAATTATTGGTACCGAGACACGAACCTCTGATTTTCCAAGCAGGCATAATTCTGAAGCAAGTTCCTTTTCAAAGAATTTAAACAGAAATGACAATCCCAACTATTTTCAAGACCAGGAGGTTATGGAACTTTATTCACGGGTCAAAGGGCAAAAGGATGAAATCATGTCTCTTTGTGAACAAATTGCTGGCGCCAGTGTGAGGGAATTGAAGCTGTTGAATGAGAAATATACGTTGGAAATGAAATTTGCAGATCTGCGAATGGCTCTAGATGAGAAG…
>F01_transcript_101760
ATGGGAAGCCAGTTGCTCGCCTGGATTATTTTTTCTTTAGCGGAGAAGGGAGTAGAAAACAACGGTGGAGATAGAGGGGAAGTCACAATTGGACACATCCAGAAAAAGGACTCATTTAGTGGAAGAGGATTGACCAATACACTCATTGCAATTAATGTTTTGGTTTACCTTGCACAACTTGCAACTCAAGGGAAGCTAATGCTCTGGGGTGCTAAGATTAATAGTCTAATAGATAAAGGGACAGCTGTGGAGGACTTGTCTCATCTTCCTTTTTTGCATGCAAATATTGGACACCTTATGGTTAATTGTTATTCTCTGAACTCTATTGGTCCTACGGTGGAGAAAAATTAG
>F01_transcript_101761
ATGTATGGGGTAAGTGGGTCAGGAAAAGAGTTAATTGTTAGTTTTATGGGGATTTTAATGGGTATTTTACTGAGTTGTCCTTCTGAGGGATTGAATGCTGAAGGGACATACCTGCTAGAGTTGAAGAAAGGCATTCATGATGCCTATAACTATTTGGGAAATTGGAATTCTAGTGATCAGACTCCGTGTGGGTGGAGGGGTGTGAATTGCACAGTGGATTATAATCCAGTGGTGTATTCTCTCGATTTGAATATGATGAAACTTTCGGGGAACTTAAGTTCTAGCATAGGTGGTTTGGTTTTCTTAACTTATCTCGATGTCTCTCACAATGCATTCACTGGAACTATTCCCAAAGAGATCGAAAATTGCTCAAGGTTGGATACTCTTTATTTAAACACT…
>F01_transcript_101763
ATGGAGCAGGGATTGTGTGGACACTGTAAGAAGCTTGCTCCAGAGTGGAAGAAGGCTTCAAATAACTTGAAGGGCAAGGTGAAGCTGGGTCATGTAGACTGTGATGCCGACAAGTCTTTAATGAGCAGGTTTAATGTGCAAGGTTTCCCAACTATCTTTGTATTTGGTGCAGACAAAGATAGCCCATTCCCATATGAAGGAGCAAGATCTGCCTCTGCGATCGAGTCATTTGCTCTTGAGTAG
>F01_transcript_101764
ATGCTTGGGATGAAGCCTGGTCCGGAGTCGGTTGGGATCTTTACCATTTCACATAGTTGCAGTGGAGTGGCAATTAGAGCCTGCGGTCTTGTATGTTTAGAGCCTTCAAAGATTGTGGAGATCCTTAAAGATCGTCCATCTTGGTTCCGTGACTGCCGGAGCCTTGAAGTTTTCACTATGTTTCCTGCTGGAAATGGAGGAACGATTGAACTTCTTTATACACAGACATATGCTCCAACCACACTGGCACCTGCACGGGATTTCTGGACTCTCAGATACACTACAAGTTTAGACAATAGCAGTCTTGTGGTTGACATGCGAGGAGATCTTGGAATGCTTTCAGCACATCCATTATCATCGATCCTGTCACTCCATCACTTTGATGTTGTGGAGCCAATC…
>F01_transcript_101765
ATGGTGTCTGCACCGACGATTAAACATCAGACTATTCTCGATTTTGAGACATCGATGTTTAAGAAAGAGAAAATTTCTATGGCAGGTCATGATGAGGTTGCAGTGTTGCTTCTCACTGAGATTACTCCAAAAAGTGCCGTACATAATGCCACAGAGGTTGCTAGGTTTGTGACAAATTCCTGGAAGATTTTATAA
>F01_transcript_101766
ATGGCGTTCTCCGATAACTCTTCTTCCAGGCAATCACTCATTCCAAGCTTCCTCTATACTTCATCTAAAACCCTGCTCCTCGATAAACTCACCGGCTCCTCGTCAAACCCTAGCTTACCATCTGCAAATGGAACTGGAGAACTCTCACCGGTTAAGAAGAGCTTTTTGATTCAAGCTCCGAACGAGCCTGCAGGCAAGATCCAGATGTACTCGCCAGAGTTCTATGCCGCCTGTACCGCTGGTGGAATCCTGAGCTGTGGACTTACTCACATGGCCGTTACTCCTCTTGATCTTGTCAAATGTAATATGCAGATTGACCCTGCAAAGTACAAGAGCATCACATCTGGTTTTGGAGTATTGCTCAAGGAGCAGGGAGTCAGGGGATTTTTCAGGGGATGG…
>F01_transcript_101768
ATGGCACCAACACCAGCTTTCGTTTCCAAGACAGTAGCACAACTACTCATCCGCCGCCGTGGTGGCTTCAGCCTCTCCGTGAAGTGGGCCCCACAACCACCTGAATCCTCCTCTACATTCTCCACTTCTGCTACGGCTATCTCCTCTCCGTCAGAATCTCAAGAGGAACAGAGAGGGTTAGGATGGTCAAGATTTTTGCTTTTTGTTCCTGGGGCTATAACTTTCGGCCTTGGCACTTGGCAGATTCTAAGAAGAGAAGACAAGATAATAATGCTGGAGTGTAGAAAGAATAAATTGGGAATTGAACCCATTGACTGCAACAACATTACTCCTTCAAATCAAACCTCTGATTCTCTGGAGTTCAGGAGAGTGGGGTGCGAAGGAGTTTTTGATGAGAAT…
>F01_transcript_10177
ATGGGTTCCGCAACAACAATCTGCAGCGATAAAACTGGAACTTTTACTCTGAATCAGTTGGGATTCGACTCTCTCTATTTTGCCAGAATCGATTACCAAGATAGAGCTAAGCGAAAAACGATAAGACTCTTGAGGTTGTATGGCAGGGTTCCAAGTCCCTTGGTTTATCTTTACAGGTATTCAGATCAAGAAAATGCATACTGGACAGGTTACTTTACAAGTAGGACAACCTTTAAAGGTTACGTCAGAATGACGAGTGCTTATTACCTGGTAATGTCCTCAAGGCTTTTGTACATCACAATGAGTTTTCTAAGATTTGAACTTCTTTTTTGA
>F01_transcript_101771
ATGAATGTTGGATCAGCTCATGGCCTTACGAGAGCTAAAGGTGTGATTGTGTGGAATATGAGAATTCTTTGTGTTTATGTGTGTGATGTCATCGATATTGTCACGAGGAATAACAAGTTCAAAGCTTTCATGTTACTTGGGATTTTGACTTTGTTTTGTGGCATTTACACTAAGGTAATATTCAAATCGAAAAATATATTACTGTATTCATAA
>F01_transcript_101772
ATGAAGCCATGGGAGACTTATAAGGCAGACCTGTCAATAGATCTAAAGAAGCACCATGTACCTGTGACATTCTTGGACAAACTGGCATACTGGACAGTCAAGTCTCTCAGATTTCCTACGGATGTATTTTTTCAGAGGCGATATGGATGTCGTGCAATGATGTTAGAAACTGTGGCTGCTGTGCCTGGTATGGTTGGTGGATTGCTTCTGCACTGCAAGTCATTGAGACGCTTTGAGCACAGCGGAGGTTGGATCAAAACACTGTTGGACGAAGCTGAAAACGAGAGAATGCACCTCATGACATTCATGGAGGTGTCCAAGCCAAGATGGTATGAGCGTGCGCTTGTGTTCACAGTTCAAGGCGTTTTCTTCAATGCCTACTTCCTTGCCTATCTGATT…
>F01_transcript_101774
ATGGCCAACGCAGGCCTCAATACGGCGCAGATGCTACCACGATTTCTACTTCCCCGATTGAGCTGGCGACAAACAGGTTCAGTTCAAAGACAGGCAATTCGAGCATTGAGCACTTCTCCCTCGACGTTTCCTATCTCTTCAAAGTCTAGCGACCCCAGTACGCTCATTCGGAGCAGACCAAATGTCCTCCCGCAATCCAAAATTCGCATTTTGCAAAGCACATCACTCCACCGGGCATTCCATGCAACAGCACGCCAATCTCGAGATCACCACTTTGATACCCTCAAATTCGTTCAACGATTACAAGAAGAGGGCTTCTCGGAAGCGCAATCAGTAGCCATGATGAAAGTGCTGAGCGATGTCATTGAGGAGAGTATCCAAAACTTAACCCGAACTATG…
>F01_transcript_101777
ATGTTCTTATTTGAGAATGTAGTTCGTCTTAATGATGATATTGAGGATGAAGCCAAGCGTGTAGAGAATCTGATTAGAGGCATATTTGCAGGCAACATATTTGATCTTGGTTCAGCGCAGAACAACTTGGAGGACATATACAGTTATGTGAGCATTAACGTACACACAATAACAAATTGA
>F01_transcript_101781
ATGAAATCTTTGAGTAGTGTAGGACTTGCGTTGAGTCTTGTTTTTGTGTGTCTTTTACTAGCTCTTATTGCTGAAGTTTACTACTTGTTATGGTGGAAGAAAAGGTTCATTAACAGGGATCTTGAGGATGGCTACAACAGCAGCCCATCAAGAGAGTTCTTTTACATGTTTTGTTGGAAAAAGCCATCATCTTTAAGCTCCACAGCTCTAAATCCCCAAGAACTCTGCTCATCTAGTGGAGTCACAGACACTCATGTCCAGGAATTACTGTCTCAGGGTCAATCAAACAAGGACTTGTGGCTCAGATCATTTGGGGAAGATAGTGTTGAGGCTGAACTCTTGAGGCTGCAGAATCTCTCAGGCCCACCAAGATTTCTCTTCACCATCAAAGAGGAAACT…
>F01_transcript_101784
ATGAGCTTTCAAGTCAATAATAATAGGCCTCCATTCCCTCCTCCTTTTGGACAGTCAGCTCCACCTTTGTCCGGGTCTCGTCCGGGTCCACCACCACCTCCAGGTGCCATTCCAAGGGCTCCTGGTGGCCCCCCACAAACTAGCTTGGTGCCCCCTAATGCGGTGCCCAATAGGCCCAGCGGTCCTCCACCGTTTGGAGCGAGGCCTCCTGGTGCTTTCCCACCTGCTGGGGCCCCACCTCCCGGTCCTCGTCCAGGTTCTTTTCAGTCCTCCCCTATGACACAAGGTCACGTTGTGCCACCCTCTACTGGTGCCCCAAGCCCGTTTAGTAATGGACCTCCTGCGATTGCTTCGGGGGCTATTCCAGGTGGACCCCGCTTTCCTTCTGCTGGAACTATT…
>F01_transcript_101785
ATGATATCCAATCTGCTACCTTGCACAAAGTACTCTTTTCGGATAGTATCCTACACAGAAGCCGGTGACTTGGGACACTCTGAGGCAAAGTGTTTCACCAAGAGCGTGGAGATTATTCAGAAGAATCCCAACTCGGTTGCAGTAAATCATAAAATGGAGAATTGTCAAGTTGGAGGAAGTTCAATTGCCAACACAGAGCACAAGACTGCAGCAGATGTTGAATCTGATTCTGGATTCAAAGTCCGTGATCTTGGGAAGATCCTGCGACTCGCTTGGGCTCAAGAGCGGGGTTGTCTCGATGGGTTTTGTGGTGTTAGTATAGGAAAATGCTGTGGGGTTGGCAAAGAGGTTAAGCCTGAATGCATACAAGAAGATCAGTTGCAATCTGTGTCACGCGAG…
>F01_transcript_101788
ATGTTTGGTTTTGTGTTTCAAATTAGTTCTTTGATCACCGAGAAAGAACTCAAACTTCGGCAGGCAATGACTATGATGGGTCTTTATGATACTGCATATTGGTTGTCATGGCTTTCATGGGAGGGAATTATTGCAATTTTTTCATCCCTTTTCACAGTTCTCTTTGGAATGATGTTTCAGTTCGATTTTTTTTTGAACAACAACTTTGTGGTTCTGTTCCTTTTATTCTTTCTTTTCCAATTAAATATGATCGGTTTTGCATTCATGCTATCAGCCTTCATTAGCAAGTCATCTTCGTCCACAACTGTGGGTTTCTCTGTATTTATCATCGGTTTCCTTACTCAGCTTGTCACAGCATTTGGATTTCCTTACAGCGATAACTTCTCGAGTAGCTATCGG…
>F01_transcript_10179
ATGGCTTCCATCAATATGTCATGCCCCTCAACACGTTTGCCCAGATCACAGGCATTGAAAAAATTCACATTATTCAATGGACTGCACTGTGTAAATTTGTTCACTGCAAATGGATTCACGTCAGAGGCTTTTATCCGGATGGGTAGCAGATCAGGCTTCTCTATTAAGGTTGATGGAAAAGTCAAATCCACTCTTTTATCTGGAGAAGGTGACCTATTGTCTCGTCAAAATAGCGGGAAAGATTCTCTATTCAGTTCCCTCTCAGCTGGGATTGAGATACAGCCTGATGCAATAGCTCTGGGAACGCTCGCATCGGAGACCACTACTACATCTAGTGGTTTCCCTACTGACAGTGATGAATTTGATTTGGACCGTCCGTCGGTTGGTTTTTCATCCATT…
>F01_transcript_101790
ATGTACAGCTTTCGTGTGGACAAGAATATTCCAGTTTCAGTATTCAAGGAGAACATAGCTAGTAAAATTGGAGTCCCAGTTGGGCAGCAACGGCTGATCTTCAGGGGCAAGGTCTTGAAGGACAGTCACCTTCTTTCTGAATATCATGTGGACAATGGACATACGCTGCATTTAGTAGCTAGGCAGCCTTCTCAACCACAATCCTCATCTAGTACCAACGCTGGGGAGACAACCACAGGACAGGATGCTAGTGCTGGTTTGCCACGTACTCGTGTTGGGCAAGTTTCCCACAGTGTAGTACTTGGGACCTTCAATGGTGGGGAGCAAGGAGAAAGCAATGTGCCTGATTTAAGTCGGGTCATCGGGGCAGTTTTAAATTCTTTTGGAATTGGAAACCAT…
>F01_transcript_101796
ATGGATCAGAATGCTTCACTTGAGGAGGGAGAGGGTTTGAAAAAGGGCGTTGAATTGGTTAAATCAGCCTCGGATAAGCATCTTGATCTTTTGAGGCCATCAGCACACTACTTTTCAATGTTTAAAGGGCAAACAATAGATGTTGCAGACCGGGAAAAAGGCAGGTATACACTTATAAGAGACGCAGATGACTTCCAACAAGGAATTTATGACAAACCACTTCCTTGCTTTGGCTGTGGAATAGGATGGTTCTCTTTTCTATTGGGGTTTGCATTCCCGTTAATGTGGTATTATGCCACAATTCTGTATCTCGGGAACTACTACCGCAAAGACCCTAGAGAACGAGCTGGCCTTGCTGCTTCTGCTATTGCTGCAATGGCATGTACTGTTGTGTTGTTG…
>F01_transcript_101797
ATGTACTTAGACAAACAATTACCAAATGACAAAGACAATGGCATTAATTTGTACAAGGCAGACGTCGGATCGTGCATCAAGTGGCTAGACGCCAAAGACCCTGGCTCGGTAGTCTACGCCTCATTCGGGAGCGTGAAGCACAACTTCGGCGATGACTACATGGACGAAGTAGCATGGGGCTTGTTACATAGCAAATATAACTTCATATGGGTTGTTATAGAATCCGAACGTACAAAGCTCTCTAGCGAATTTCTTGGCAGAGGCAGAGGAAAAAGGCCTAATAGTGAGTTGGTGTGCCCTCAACTCGAAGTTTTGTCACATAAATCTATAGGGAGTTTTATGACTCATTGTGGTTGGAACTCGACGGTTGAGGCATTGAGTTTGGGCGTGCCAATGGTG…
>F01_transcript_101798
ATGGCATTGACAAATAGCATTGCTTCAGAGGCTTTGCATGGTGACATATCTCAACATCAGAGGGAGAGAACTCTAAATGGATTTCGGCAAGGGAAATTCACTGTGCTTGTTGCCACTGATGTTGCATCTCGCGGGCTTGATATCCCAAATGTAGATTTAATAATCCACTATGAACTACCCAATGACGCAGAGACATTTGTTCATCGTTCTGGTCGCACTGGACGTGCTGGAAAAGAAGGTTCAGCCATTCTGATGTTCACTAATAACCAGAGGAGAACGATCAGCTCACTTGAGCGTGATGTGGGGTGCAAGTTTGATTTTATTAGTCCACCAGCTGTCGAAGAGGTTTTGGAGTCATCAGCCTGA
>F01_transcript_101800
ATGGCTTTGGTAAGTTCAATACCTGCTATTCCGCAGCTGATGATTAGGTTCCCAGATATTGCATTTACAGGAATCATGAAAAGTAGGAGTGAAATTGTGGAGGAACTAGCATTACCTGTAGAAATGGTGGAAGAAGATAAGTTATATGTTTTGGTGGGAAAAGATGTGAAAGAAAGCGAATCAACTCTTACATGGGCATTGTGCAATTCAGGAGGCAAAAAGCTATGCATCCTCCATGTTCACAAGCCCTCACAGAAAATACCCATGATGGGTACAAAATTTCCAATAAGTCAACTAGAAGACCACCAAGTCAGAGCATACCACGACAGCGAGAGGCAAAATATGCATAAGCTTCTGGAAAAATACTGTCTGATATATGAGAGGGCTGGGGCACGGGCA…
>F01_transcript_101801
ATGGCTCCGAATCTTCCGACGGAGCTCGAACCCCCATTATCCTATTCCGAAGAGGAAGAAGAAGATGAAGGATCCGAATCAGAAGAAGGGTCCGATTCAGAATCCGAAGGCGGCAACAAGACTACACAATCTCTTCCTCCGGTCACAAAAATTCATGCTGATGACGATGACGATGATGAATCCGGATCTGAATCTGAATCGGTGTCTGACTCTGCCCTCGAGAAATCCCGGAAAACGGACCCGACTATCAAGCCTAATGTTTCCAAGCCCGTGGAAGACCCAGACAAGTCTTCTACTAAGAAACCCATATCCAAACCCAGCTTACCCGCTTCCCCAAATCCGACGGTGAAGTCTGGGGCAGGATTCAAACGGCCTGCGGAGAGCGAATCAAAGGACTCT…
>F01_transcript_101804
ATGATTATGGTTAGTGCTGTGAAGTTGGTGGACGAGGTTATATCTGATGCACCCTATGTAATAACTGAAGATTTTATGAAGAAGCTATTTGATGACTACAATATAGATTATATCATTCACGGGGATGACCCGTGCATTCTCCCTGATGAAACTGAAGCTATTTAA
>F01_transcript_101805
ATGCCAGACAATTATAGCCTTGAGAGAAGAATTGTTCTGCTAGCTTTAGGAGCAGAGTTGTACATCACAGATAACAACAAGGGCATTGATGGGGATATACAAAAGGCCGAAGAGATACTTGAAAGAACACCTAATGGTCATTTTCTTCGACAGTTCGAGAATCCTGCAAACCCAAAGATTCACTATGAGACCACTGGACCAGAGATTTGGATTGGCTCTGAAGGAAAAGTTGACTCCCTGGTTGCTGGAATAGGGACTGGAGGTACGATAACTGGCACAGGGAAGTTCCTGAAGGAAAAAAAACCCAAACATAAAGGTATATGGTGTAGAACCAGTTGA
>F01_transcript_101806
ATGGATATAGTGTCTAGTTGCAAGGACAAATTGGCATATTTTCGAATAAAGGAGCTCAAGGATATCCTTACACAATTAGGTCTTTCTAAGCAAGGAAAGAAGCAGGACCTAGTTGACCGGATATTAGCCATTCTTTCTGATGATCGAGTTTCTGGAATGTGGGCAAAGAAAAATGCTGTCGGGAAGGAAGAAGTAGCAAAACTAGTAGATGACACTTACAGGAAAATGCAGATTTCTGGGGCAACAACTGATTTATCATCAAAAGGACAGTCTCTCTCAGATAGCAGTAATGTGAAGCTTAAAGAAGAACCTGAAGAATCTTATCAGATAGAAAAGATTCGATGTCCCTGTGGGAGTGCATTACCGGATGATTCAATGGTTAAGTGTGAGGATTCAAGA…
>F01_transcript_10181
ATGTTTCCAGGTATGATGGATCCCGAGTTGATCAGACTAGCTCAAGAGCAGATGGGTCGTATGTCACCCGCCGAATTAGCCAAGATTCAGCAGCAGATGATGTCTAATCCTGAATTGATGAGAATGGCTTCTGAAAGCATGAAAAATATGAGGCCTGAAGACTTGAAGCATGCTGCTGAACAATTGAAGAATACCCGTCCAGATGACATGGCTGAGATAGGTGAAAAGATGGCTAATGCTACACCTGAAGAATTAGCGGCTATGCGTGCGCGGGTAGATGCACAGGTCACTTATGAATTAAATGCAGCTCAGATGCTGAAGAAACAGGGTAATGATCTTCACAACCAGGGAAAGTTCAATGATGCTTCGCAGAAATATATGCTTAAAAACCTGAGAGGC…
>F01_transcript_101810
ATGGAAATGAGAAATATTTTTCATTATAATGCAGTGATGGAGAGCTGGCAACTAGCTTTTAATTGGGAGGAAGGTGTTGATTTCCAGATTCGAGATGTGCGGACTCGGGTACTTACTGATATGGCTTGGGTTACCATGCAAGCCTATGTTGACATGGAGATAGGACCATTCAATGTGACTAATGCTTTTGAGTTTCACAATGGACGGTGGTACATGGTACATCATCACAGCTCTGTGATGCTCATCCATGGAGGGCCAGAACAACAAATGATATTGGGCTAA
>F01_transcript_101812
ATGGGTTATTGGCAAACAAAAGTATTACCAAAGATAAAGAAGGTTTTTGAGAAGAATAGTGGTAAGAAGGCTGCTGCTGCTGAAGCTTGCAAGTCTTTTGATGACTCTAAGGAGGAGTACAGTAAGGTGTTTGAAGAGAAAAAGACTGAGCTCCAAGCTAAAGTAATTGAGATATATGAAGCTTCAGCAACTGAGATCAAGACTTTGGTTAAGGAACCCAAGACATCAGGACTCAAGAAGCATTCCGCTGGTGTAGAGAAATTCCTTGATGACCTCTCCAAAGCTGAATTTCCGGGATCAAAACCAGCTTATGAAGCAACAACAAAGTTCGGGGCAACCTATGTTTCAGGTCCCATTTTCTTTGTATTTGAGAAGGTGTCAACTTATATCGTGATAGAA…
>F01_transcript_101813
ATGGCTTCTTTGAACTTATTCTTCTCTCCCGTGGTCATCCCCGGCGGCCGAGGAAGAGGAGTACGAACAATGGCAACCGCTTCAAAGAGCTCCGGCGGAGGCAGTGAGGAGAAGAGTCTGTTAGACTTTGTCCTTGGGGCATTACAGAAGGAAGAACAGATGTTGGAGGTTGATCCAATCCTCCAGAAGGTGGAGGGGAAGACTAGTGGCACTACCAGCCGCAAGAATTCCGTGGCAGTTCCTCCAAAGAAAGAAAATGGTGGATTTGGTGGATTTGGAGGCCTCTTTGCAAAGAAAGAATGA
>F01_transcript_101814
ATGCAGATAAAGAAGGCAGCATCAGACAATGGATCTATAACTATTAAGCCTCCCTTTGAGATCCTGCTTGGTAATAATATTTGGAACTCTTGTCTTGTTGGTAGCTTTATTCATTCTAGACTGCCTTTCAAGGTTGTGGAAGAAAGTGTGCATAAGCTATGGGATAAATTTGGTTTGCAAAAAGTATTCTTGCAGGATAAGGGATTTTTTATCTTTAAATTTTCAAAACCTGAGGATCGAGACAACGTTCTTGCTTTAGGTCTTTGGTACATCTCAAATAAGTTATTGATTTAG
>F01_transcript_101815
ATGAGGCCTGCTAGAGAGGGTGATATTCCTGTTAGGGTTAAGAATTCTTACAACCCTAATGCTCCAGGTACCCTCATCACTAGAGAAAGAGACATGAGAAAGGCAGTACTAACTAGCATTGTTCTGAAACGGAATGTGACAATGTTGGATATTGTTAGCACTCGTATGCTTGGTCAGTTTGGCTTCCTTGCTAAGGTATTCTCAATCTTCGAAGATTTGGGCATATCTGTGGATGTTGTAGCCACTAGTGAAGTTAGTATTTCCTTGACACTGGACCCATCAAAGCTTTGGAGCAGAGAACTGATTCAGCAGGAACTTGATCATGTTGTTGAAGAACTTGAGAAAATTGCAGTGGTAAATCTTCTTCAGCACCGATCAATTATCTCTCTCATTGGGAAT…
>F01_transcript_101818
ATGATAGGAGCCGAGGGGTTAAAGGGTGAAAGCTTGGACCTTTGTTTTGAGAGGATGATGGTGGTTGCCGGTGGTGGTGGTGGTTATGGTGGTGGGATGAAAATGGATGGTGGTGGAGTGATCACAGAATGGAAGGACATTCCGATGGAGCTTCTGTTGAGAATTGTATCTCTTGTGGATGATCGGACGGTGGTGGTTGCTTCTGGGGTTTGTAGTGGCTGGAGAGATGCTATTTGCTGGGGACTTACAAATCTTTCCCTTTCTTGGTGCAAGAACAACATGAATAATTTGGTGTTATCTCTCGCTCCCAAATTCACAAAACTGAGAGTTCTAGTTCTGCGTCAAGACAAGTCACAACTGCAGGATAACGCGGTTGAGACTATAGCAAACTGTTGTCAT…
>F01_transcript_101819
ATGATGTTGACTTGGGAGGATGCTTACTATGACAACCATGGGCAACATGGTCCTTCAGAGAACAAGTGGGGTAGTGACATAGCAGGCAATTCACGTGATGGTCAATTTTCACATGACTCTATTGGATTAGCTGTGGCAAAGATGTCAAATCATGTTTACTCACTTGGGGAAGGGATTGTTGGACAGGTTGCAATTACTGGTAAGTATCTGTGGATTTCTGCTGAGAAGCATGTAACAGATTCCTGCTCCTTGTTCAAGGATGTTGACATAGGAGGATGCTTACCGTGA
>F01_transcript_10182
ATGTCTTTCCGACAAGCCGTGGCTGGTTTCGTCAAAAGATTCCGTTACCCTTCGCAGGCAGTAGTTGTTACTTCACTTCGAGCTATCAATTCTTGCAATAATTGTTCCTGTCAATATGATCGTGGAGGTCATACTTGGAGTAGGTGTCATGGTGCTTTTAAATGGATTTTTTTATCTGGACAAGCAGTACTGTTTCTTGGGATGTACACCAGTCCTGTTTTAGCAGAAGAAATTTCTGTCGACTTGAATTCTGAAACTGATTCAAGTGGGGAAAACCTTGCTGGCTTACGCAAGATTGAGGATGGATCTGTGCTATCAAATATACATACATCCAAGTGGAGAGTTTTTACAGATACCGGAAGAGATCGATTTTTGCAGGGAAAACTGGAGGACGCTGAA…
>F01_transcript_101820
ATGTCTTCACCTGAAGAAGCCAAGGCTTTTCGCTTGAATTCTATAGAGCAGGAAATATATGAGTTGGAAAACAGTCTCTGTGGTGATCAACGTATAGGATTCTGCCACAATGATTTACAGTATGGTAACATAATGATTGATGAAGAGACGAGATTGATAACCATAATTGTAAGTACCATTTTTTAG
>F01_transcript_101822
ATGACAGACGATCGATCAAAGCTGTTGATCTCAGAAAACCCTTACCATTCGCTTGATCAACGGCCGAATTCGTCCCAACGTCCGATAAAGATCACAAAAGTCAACGAAGAAGAAGAAGAAGAAGAAGAAGATAGAGATTCGCTTGGCAGTGACAGTACGATGAAAAGCCGAAACCCTAGAATTCAAAGGTACTTGGTGGCGGTTGAGTATATTGGGACTCGATTTTATGGGGCACAACAACAAGCTACTTGCAGAACTGTCGTTGGTGTTCTTGAGGAAGCTTTCCGTAAATTTATTGGACAGTCAGTATCAATCATTTGCTCAAGCCGAACTGATGCAGGAGTACATGCCTTATCGAATGTTTGTCATGTAGATGTGGAGCGTATAAGCAAAAGGAAG…
>F01_transcript_101824
ATGAAAGAAGTTGAGAAGAGCTTGGACTCTCAATTATGGCACGCTTGTGCTGGTGACATGGTTCAAATGCCTCCTGTGAATTCGAAGGTCTTTTATTTTCCTCAAGGGCATGCCGAGCACACCCTTGCTCACGTTGATTTTGGGGTGCTGCCTAGGATTCCGGCTTTAATCCTTTGTAAGGTTGTTGCTATTAAGTTCATGGCAGACCCTGAAACTGATGAAGTTTATGCCACAATTAGGTTGATTCCAGTTGGAAACAATGAGATTGATTATGATGAGAATGATGGGGTTTTGGAGAGTAATGGGTCTGAATCCCAAGAAAAGTCCAGTTCCTTTGCAAAAACGTTGACCCAGTCTGATGCTAATAATGGTGGAGGTTTTTCGGTTCCTCGGTATTGT…
>F01_transcript_101825
ATGGCAAGGAATGTGGGCTTGATCAGAGAGCTGAACAACAACATAAGGAGGGTGGTTGATGTTTATTTTGATCTTTCTAGTAATTTTGGCAAATCCATGGAAGCTTCATCTGAAGGAGAGTTAAGTGGTGCTTTGAGGTCAGATGGCAAAGCTACTCACAAGAGAAATAGGCCTGGAAAACTGCTTCTATGA
>F01_transcript_101828
ATGTTGAAGACAACTAGGGGTATAGAAGAAAGGAAGTGTGAGTTCAAAACCTTTGTTTTCATGTTTCTGATCAAGTTGATACTTCTCTTTGAACTATTTCTAGCTCTAGCAGGTCTGCAGATGAAATTGGTTTGCCCACGTGTTCGTTTAGAGGATTGTTTGCAGAATTTTTCAGCTGAAGAAGTGCATGAATTTTACAGTACTGCCTTGAAGGCTAAGACAACTGCAGTGAAAACTGCAGGTCTGACATCGTTTCTAGATTATTTGGTTGTTGCATATGCGAAAATTTGTCATGGAGTCGGGCTGGGTACCAAAAAAGCTTGGTATTCTCATTGCCTGAAATTATTTTTGCTATGCAATATAATCTGA
>F01_transcript_10183
ATGGAAAGTGAAGGGACTAGGAGGAATGCAACCCTAATTTGTGCGCCTATAATGGCGGATTCGGTGGAGCAAATGGTGGTTCAAATGAATAAGGCCAAATTAAGTGGAGCTGACCTTGTCGAGGTTCGATTGGACTTTTTGAAGAGGTTTAGTCCGACGGAGGATATAAAATCCCTACTTAAACAATGTCCTCTGCCTACTCTTTTCACTTACAGACCTAACTGGGAAGGTGGTCAGTATGATGGTGATGAAAAAAGTCGACTGAACGTGCTTCAATTGGCCATGGAATTGGGAGCTGATTACATTGATGTGGAACTTCAGGCTGTTGACGAGTTCAACAATTCAATGCGTGGTAAAAAACCTGCAAAGTGCAAAGTCATTGTTTCTTCGCACAACTAT…
>F01_transcript_101834
ATGGAAAGTAAGGGGCCGGAGCAGAGGCTTGCCGCCGGTGGCGGCGGCAGCGTTCAGTTTCCTGAAAGCCCAACAGAACCAATGCAGTTCTTGTCAAGGTCATGGAGTCCCTCAGCTTTACAACTCTCAAAAACATTAGTAGCTCCTCTAACCCCAAAGTTAATACTTCCCAAAAAGGCTCGTAAGGCTGCTGCTTCTGGTGCTGAGTCCGGCAGTAGTAATTCGAAAACAGAGGAAGTAGCCGGCGCCGGAGAGGCAGCCGAATCGGCAGTACTTTCTGGGAATACATTCTCATTCGCTTCTTCTGCAACTTCCCAACTGGTTCTTGAACGCATTATGTCTCAATCTGAAATATCTCCATTAACATCTGGGAGGCTGTCTCACAGCAGCGGACCCTTA…
>F01_transcript_101835
ATGAATGTCATGCGGCGCCTGAAGAGCATTGCTTCTGGCCGCTCCTCCGTTTCCGATCATGGTGGAGATTCTAGCATAAAGAGGGTAAATGTTGAGCAAGACGCCAATCAAAGGGTTTCTAGAAAATTTCATTCAACTGAGAAATTTGCCACATCAGTGGAGCAGCATATGGAATCCGCATCTCGGGAAACTACTGCAAGCACCAGTGTATCTTCTATTGTTAGACCGGAGAAATCTGACCATGATGAGCTTCCTTTAGTAATGCATGAAATGAAGATTAGTGAGAATATATCTGACATCCATGATGACAAGGATATTGAAGCCACTGTTGTTAGTGGTAATGGAACAGAAACAGGTCAGATAATTGTGACTTTGGTGGGTGGTCGAAATGGGCAAAAG…
>F01_transcript_101837
ATGCGTATACAGGGAAGCAGTAACTATTCATGTAAGCTGAAATTCAAGGAACAATCTATTATAGAGCGAAACCCTCACCAGGTGCAAGGCATAGTCCAAGATAGTAATGGGAAGACAGTTGCAACTTTGTTTGGGAAGTGGGACGAGAGCATGCATTATGTGGATGGAGACTTCTCTGGCAAAGGAAAGGGGTTTGATATGTCAGATGCTCATTTGCTTTGGAAGCGTAGCAAACCTCCTAAGTTTCCCACTAGATATAATTTGACAGGCTTTGCCATAACACTGAATGAGCTCACCCCTGGATTGAAGGACCAGCTGCCGCCAACAGATTCAAGGCTAAGACCTGATCAGAGGTGCCTGGAAAACGGGGAATATGAAAAGGCAAATGCTGAAAAGCTG…
>F01_transcript_101838
ATGGCTACTTTGCAGAGACTGCCGCACTCGACCTCGTGCTCGACTGCGAGTAGTTACGGGACGAATTCGGGTAAACCCGAGACCTTCCCGGCCGGTTTAAGAGTTCTTGTTGTTGACGATGACATTACTTGCTTGAGGATTTTGGAGCAAATGCTTAGGAGATGCAGTTATCTAGCTACGACATGCTCCCAGGCAACTGTTGCTTTGAACCTACTACGGGAGAGGAAAGGCTGTTTTGATTTGGTACTAAGTGATGTTCATATGCCTGATATGGATGGTTTTAAACTACTGGAACTCATTGGTTTGGAAATGGACCTTCCTGTTATTATGATGTCAGCAGATGGAAGGACCAGTGCTGTTATGAGGGGAATTAGACATGGGGCTTGTGATTACTTAATC…
>F01_transcript_101845
ATGAAAACTGTGGGGACCTTGGGGCTTCAGGTACTGGGTCTGGGTGTGCTCCAAAACGTTTCCTTGTCTTTGATCAGTCAGGAGATAAGACCCACCTTGATTTTCAGTTCTGGGATTGGCACTCCTGTCAATTGCCTGCCTTCTTGGCTCCCAAAGCCATCTAATGCATTTAATCTGAACAAGGAAGAGGCGGGAACTAAAATAGATGCAAGTATATCTGGACCATTTTCACTTGATGAATTTAATGAACAAGATAACGAAGATGATGTGCGAAGTGAAATGCATGAAGATACTGAAGAACTAGATGCCCTACTTTACTCTGATGATGAAAACGCTTATTCTGAGGATGATGAAGTAACAAGCACTGGTTATTCGCCTAGTACTATGACTGCTTATGAC…
>F01_transcript_101846
ATGGCTGGAGATGAAAGAAATAGAGAATTCAAGGTTGCAAATTTTATACGGACAGATCTGTTGCAAAAATTCATCTCAAGAAACAATATTCCAGGCAAATTGGAAAATAAAATCCCAATTGAGGAAGACGAAGAAGAAGAAGAAGAGATAGAACTTAGTCTCGGGCTGTCGTTAAACGGTAGATTTGGGGTTGACCCGGAAAGAGCTAAGGAGATAGTTCGGGCCTCTTCGATATCAAACTTTATGATCATTTCCGGTGAAAAGGACTCAAAAAGTTGGAGTCCTTACGACGCGGCTTTGACGAGGACTTGTTCTTTACCGACGGAGACAGAGGAGGAATGGAGAAAGAGAAAGGAGTTGCAGTCACTGAGGCGTATGGAGGTGAAGAGAAAGAGATCT…
>F01_transcript_101847
ATGGATATCGTGTCGTGGACATTTGATAACAAGACATTCGACCAAGATAAGCCATTGTATATTGACAGTAGTAATCCCAAACGATGCCTCTCTGCAAGACAGACTCGAACACTCGTTCGGAAGCTCGTTAGTGGGTTTCACGCTCATGGCCTTAAGAAAGGTGACTGTGTTTGTGTAGTGAGCTTCAATGATATCCATTATACAAGCTTGTATTTGGGTATCATCGGATCTGGAGGGTGCTTCACTGGAGGCAATCCTGGATACACTGCTCATGAACTGGCCCATCATTTGAGAATAACAGAAGCCAAATTCATTCTAACGTCTTTCAAGACATTAGATATTGCAACTACAGCCGCCAAGGAATGTGGAATTCCTCAATCTAAGGTCTTCGTCCTCGGC…
>F01_transcript_101849
ATGGGGAGAGGGAAGATTGTGATCAGGAGAATCGATAATTCCACGAGCAGGCAAGTTACCTTTTCGAAGAGGAGGAATGGATTATTGAAGAAGGCCAAGGAGCTTACCATCTTATGCGATGCGGAGGTTGGAGTCATGATCTTCTCTAGCACCGGAAAGCTTTACGAATTTGATAGCACCAGGTCTTATTTTCTAATCTCATCTATATCGTTAGCCAGAATTAAATATTAA
>F01_transcript_10185
ATGCATTTCGTTTTTACTGCGCTCAACCGATTAATCCTCCTCCGCCTTCCAAACGACCAGGACCTCTTGCACACTATAGGACTCTTGTTAATCAAGGGAAGCTACAACATGATCCTTACCAGGAAAATATTGTTTTCGAACTGGAAAATTTGCTCAAAAAATTGGAACAATATGAGAAAGATATGGAGGAATACCATACTATCCAAGTGGGAGGAGAATAGGGAGAATGAACGGCGTAGGCTTTTAATGGAGGAAGCTGAGGTCAAGCAGGAAGGAGTTTTCTCATCAGTAAAAAAGAATCGAAGTAGAATTGTTGAAAATTTGATATCTTGGGGAAAAGGTGAAAAAATCGAACCTGGAGTGGGTAAATGGGTTTCATACCTTAACAGAGAGAGGAAG…
>F01_transcript_101850
ATGCAGCTGATAAAAGACCACCGGGCTAGAGGTTTGAAGAAACATTTGAAGAGGCTCAATGCCCCAAAGCATTGGATGCTTGACAAGCTTGGTGGTGCATTTGCTCCCAAGCCATCTTCTGGGCCACATAAATCAAGGGAGTGCTTGCCCTTGATTCTTATCCTACGAAACAGGTTAAAGTATGCACTGACATACCGTGAGGTCCAATCCATTCTGATGCAGCGTCATGTTTTGGTTGATGGAAAGGTTAGGACAGATAAGACCTACCCTGCAGGCTTCATGGATGTTGTGTCAATTCCAAAAACCAATGAGAATTTCCGTCTTCTTTATGATACAAAGGGCCGATTCCGTCTGCACTCAGTTAGAGATGAAGAGGCAAAGTTGGCAGATTCTAGTTTG…
>F01_transcript_101851
ATGGCACTTGTTGTAATATGTGGGCAACCATGCAGTGGTAAGTCAACAGCTGCCCTCTGCCTTGCTGAAACTCTCAAAGACTCAGAGTCTAAGCCAATGATCAGAATCATTGATGAGACTTCCTTTCATCTTGATCGCAATCAAAGCTATGCCGACATGATTGCAGAGAAAAATTTAAGGGGGGTGCTTAGGTCAGAAGTTGATAGATCTTTAAATAGTGATAGTATTATTATAGTAGATTCCTTAAATAGCATCAAGGGTTATAGATATGAGCTATGGTGTTTGGCCCGTGCTGCAGGAATTAGATACTGTGTCCTGTATTGTGATGTTGAAGAAACCCACTGTAGAAAATGGAATGAAGAACGCAGGGAGAAAGAAGAACCCTCATATAATGATATC…
>F01_transcript_101852
ATGGTGAACAAGGTATGGAGAATAATACCAAGGCCACTCCTCGAAACAATCCTTAACAACCACGCCCACCACCACCGTGTTCCTCAACCCCTCATTCTCCACGGCCCTCGCGGCGTCGGCAAAACCACTCTCGTCCTCGAACGTCTTATAGAAGACTGGAATACAGGCCCTCACATTACCGGTTATGTGGATTTGGCAGAATCCATTGAATCCCACCACCCAAAACACGGTCATTCTTTCCCATGGGCATCTTGGTCGCTTTGCCCGTCTCCATCTCTCCCCAATCTCACTACCCAGCTCGACCTCTGTCTCGAGTCCATGGCTCAACAGGGTATTAAACTTGGCACCATTAGCTCTCAACAAATATTCACTACCCTCAGCAAATGGCACAATCTCAAT…
>F01_transcript_101854
ATGCAGGCAATGCAGGCTTTGGCACTTGAGCATAATATTGATCTATCACTTCCTGCAAATGCCAATTTGATGGTGCAGCTTATTCCTCTCATGCAGTCCAGGATGGTTTCTCAGCACAAAGCGACTGAAAGCAATATGGATGGACATTCCTCATTTGTCCCTATGACAAAGCAGCAGTTTTCTTTTGGCGAATTACATGTTGAAGATAAAGATGACTTTCCTCCGAATGCACATAAGTGGGATTTGGATACAGAATTGACGAAGCGGTAA
>F01_transcript_101855
ATGTTAGGTGCTCGGAGGAGTCGAGCTTCTGTGATCGTCTTAGGAATTGTTTTGTTCGGAAGCCTATTTGCATTTTCTGTCGGAAAAGAGGAAGCCACCAAATTGGGAACAGTAATTGGAATAGACCTTGGAACAACTTACTCTTGTGTTGGTGTTTACAAAAATGGACATGTTGAGATCATAGCGAATGACCAAGGTAACCGCATCACCCCATCATGGGTTGCCTTTACTGATGGCGAGAGATTAATTGGTGAGGCTGCAAAGAACCAGGCAGCTGTTAATCCTGAGAGGACAGTCTTTGATGTCAAAAGACTTATCGGAAGAAAGTTTGATGACAAAGAGGTTCAGAGAGACAGGAAGCTTGTTCCGTACAATATTGTGAACAAGGATGGAAAACCT…
>F01_transcript_101857
ATGCTTTTTAGCAGAGCTTGGATATGCAAAACCAAATGCTTCAGAAGTGTTATATGGACTTTTTGTTCCGCAACTCAAGGGAAGCTGTTCTACTCTCCTTGCAATTCGCTCCTTGGTGCAATGGTTATGCCGCACAATCTTTTCCTCCACTCAGCTCTGGTGCTTTCTAGGAAAATACCAAGATCTGTTAATGGCATCAAAGAGGCTTGCAGATTCTATACAATAGAAAGTGGCTTTGCTCTAGTGGTGGCCTTTCTCATTAATGTATCAGTTATCGCTGTAAGTGGTTCCGTTTGCAATTCCTCAAATCTTAACCCAGATGATCAGAAGAGCTGCCAAAACTTGGACTTGAACAAAGCCTCCTTTTTGCTTAAAAATGTTTTAAGCAGTTGGAGTTCG…
>F01_transcript_101858
ATGACGAAATCAGCAGGTAAGAAGAAGAAGCAGAAGGGAGGGTCTAAGCAGAACCCTAACATTGACGAAGCCAGTCGGATAAAGATACAAAGATTTCTTCAAGACTTCCGCACGTCTAAAGATGAAGTGTACACAATGGAAGCCAATCTGACAAATTTCGAGCGTGCTGCGGTGCATATATTGTGCAGGAAAATGGGTATGACGTCCAAAAGCTCTGGGAAGGGAAAGCAGCGACGTGTTTCTGTTTTCAAGAATAAAACAAAAGCGGATAAAAAGAAGAAGGAAAATCTCACTTGCTTTAAATTTTCAGAAGAGGCAAAACTGGTTTTACGGGACGTATTTACACAGTATCCACCTGATGATTGTGAGATGGGTGAAAAAATGGTTGGAAAGCTTGGT…
>F01_transcript_101861
ATGGAGTTTTTTGAGGCTGCAAGCTTTGGAGGGACAAACATTGATCCAACAGCTTGGGAGGACAAGAAGAACCAGGGAGAATCACGCTTCCCTGCTCAGGTCCGAGTTATGACCAGAAAAGTTTGCGAGCCATTGGAAGAGGATTCGTTCAGGCCAATTCTGCACCACTACGATGGTCCCAAGTTCCGTCTTGAATTAAATATTCCAGAGGCTATCTCTCTATTGGATATTTTTGAGGAGACCAAGGCTTAA
>F01_transcript_101863
ATGGCCACATATCTCCCCCTTTCCTCCATTTCCACCCATTTCACCCCCTTCAAATCCCTAAACCCTAACTCCCCCAAACCCCTAAAATCCCGATCCCCAATTCTAACACGCTCTTCCCTCACAGACCTTTCTCTCTCCAAAAACAGACTTCTTAATCTAATTTCAGACCAAGACAGAGGCCTCAAAACCCAAAATGACCCCAAAAAGCTCTCTCAAATCGTCGAAACCATCGACGCCATGGCTGTTCTGGGCCGCGATTCGGTCACCACCGGCGAATCATTGTCGGGTACTTGGAGGTTGCTCTGGACTACAGAGAAAGAACAGCTGTTCATAATTAAGAATGCTAATTTTTTTGGAACGGCGGCCGGAGATGTTTTACAGGTGATTGACGTGGAGAAT…
>F01_transcript_101864
ATGGAGGCTAGGGTAGGGGTGTCTGGCCATGGAGGTGCGAGAAAGTACTTACAACAGCATAATCACCACCAGCAGCAGCACAACCACCAACCACCGCAGTCTCAGATAGGTACTGTGCCGCAGCTCCTTGCCGGCGGCATTGCTGGTGCTTTTAGCAAGACCTGTACAGCTCCACTTGCCCGCCTCACCATTCTCTTTCAGGTGCAAGGTATGCACTCTGATGTTGCATTATTGAGCAAGCCTTGTATATGGCGTGAAGGCTTACGTATTGTTCAAGAAGAAGGATTTAGAGCATTTTGGAAAGGAAATCTTGTTACAATTGCTCATCGTCTTCCTTATACTGCTGTTAACTTCTATGCCTATGAGCGCTACAAAAGTTTTTTGAAATCATTTACTGGC…
>F01_transcript_101866
ATGGGTTACCTGAGCAATGAGCTTGAGCAGACTGATCCAGTTATACAGAATGGAAAAGAAATCTTGTTGCAGGCTTTCAACTGGGAGTCTCACAAACATGATTGGTGGAGAAATTTGGATAATAAGCTACCCGATATCGCAAAGTCTGGGTTTACATCTGCCTGGTTGCCACCACCAAGCAACTCCTTCTCACCTGAAGGTTACCTTCCGCAGAATCTTTATTCTCTCGATTCTGCATATGGTTCTGAGGGCGTATTAAAGGCTTTACTTCAAAAGATGAAACAGTTCAAAGTTAGACCAATGGCTGACATAGTCATCAATCATCGTGTTGGAACTACCCAAGGACATGGTGGAAGGTACAACCGCTATGACGGAATCCCATTATCATGGGATGAACAC…
>F01_transcript_101867
ATGTCGAATATGATTGAAATATTAGGAGCTGCTGACAACCCTTTGTCAGATGAACAACAAATTCGAGCAGTGATACGTTCATTTCTTGTCAATTGGAATATTCTCAAGACTAACATAGCTCAAGATGATAATATTAAATCTTTGGAAGATCTTTTTCATTACCTTGAGCGCTTAGAAGCTGAGCAGCTGGAGGTTGAGCATTTAAGGACTAAACAACTAGAGGATGAATGCCTAAAGGCTCAACAAATAGAGATTGCCAATGCTAATGCGCCTCAAAAGGTTGCAGAGGCTGATACTTCCAAGAGGAAGAGAAGTAAACGTAGTTCTGGCAAGAAGGACAAGGCTAAGTTGATTTGTTACAACTGTAGCACAGCAGGATACTTCGCTCGTGACTGCACT…
>F01_transcript_101869
ATGGGAGATCTTAATACAGAGGTTTCTGAGTCCGAATCAGAATCTGAAGAAGATGATGGAGATGTAAAGCTAACTGAACCTTCAAAGAATGCAATATACAACAGGGACGGCCTACTTGATAAACTTGGAGATATCAGCTGGCCTGAGAATGTGGACTGGATACAAAAGCTTTCCATTGATATTAGTCAAGAGCAAGAGGTGGATGTGAATGATGATCTGACAAGAGAACTTGCTTTTTATACTCAGGCACTGGAGGGCACAAGAGAAGCTTTTGTAAAGTTTGAATCAATGAAACTTCCTTTCTTAAGGCCTTCTGACTATTATGCTGAGATGGTGAAAACTGATACTCACATGGTAAAAGTTAAGGGCCGGCTTTTGGCAGAAAAAAAAAGGATTGAG…
>F01_transcript_101875
ATGGCACCATTCGGAAAGCTCTATACCTACCCGGGTAACCCCCGCTCCACCGCCATTCGCGCTGTGGCCAAGGCCAACAACGTCGAGATCGAGATCGTTGAGACTGAGCCTGCAAAGGGTGTCTCTGCCGAGTACCTCAAGATCAACAAGCTCGGCAAGGTCCCAACCTTCGTCGGTGCCGATGGTTACACTCTCCACGAGTGCATTGCCATTGCCATCTACATTACCTCCCAAAACGAGAAGACCACTCTCCTCGGCAAGACCAAGCAAGACTACGCCGCTATCTTGAAGTGGATGTCTTTCTTCAACACCGAGATCCTCCCAACCCTTGGTGGCTGGTTCCGTCCTCTCATCGGCCGTGACCCATACAACAAGAAGAGCGTCGATGAGTCTTCCAAG…
>F01_transcript_101879
ATGCTGGTTGGGATTTTAATTGACTGGATAATTGCATCTGCTGTACAGAAAACTGATGCATGGGTCCCAGGAAGTGGCAGGAACCCTGACACTTATATCCTAAAAGATCAGGAAACTCGTTATCGTCAGCGATACTTGGATTTGATGTTGAACATAGAGGTCCGACATATATTCAAGACCCGCACAAAGATTATTTCTTATATTAGACGTTTTCTTGACAATCTAGACTTTCTGGAGGTTGAAACACCAATGATGAACATGATTGCTGGAGGAGCTGCCGCCCGTCCATTTGTGACCCATCACAATGATCTGAACATGAAGCTGTTTATGCGCATTGCACCAGAACTTTATCTCAAGGAGCTTGTTGTTGGTGGGCTCAACCGTGTCTATGAAATAGGG…
>F01_transcript_101880
ATGCTCCTTTGTGCAAGACTCATTCTTCTCAGAAGAAAATTATCTGCCACAAACACCAACACCACTATTGCATTTAGAAGCTTTGGTACCACCTTCACCGATAATGAAAGCAACACCACCAGAGGAGGTAGAGGCGTATCAAATGATGATTACTTTGCGACCATCCACCATATATCCAACATAGTTCGACGTGACATTTACATGGTGAGAACTCTCAATAAAATGAGCATCACCCGTATAGTAAATTCTGAGTTGGTCTATCGTGTACTCCGTAACTGCTGCCATTGTGGATCTGAGTCCTTCCGTTTTTTCAATTGGGCTGGCACCCAACACCCTCAGTATGATCCAACCACCCTTGAGTTTGAAGAACTCCTCAAAACCCTTGCTCGGACTCGCCAT…
>F01_transcript_101881
ATGTCTGCTGGTGGGTGTAATATAGTTTGGTTTAGGAGAGATCTGAGGGTAGAAGATAATCCAGCACTGGCTGCAGGTGTTAGAGCAGGAGCAGTAATTGCAGTCTACATATGGGCACCTGAGGAAGAAGGACACTTTTACCCAGGAAGGGTTTCAAGATGGTGGCTTAAGCAGAGTTTGTCCCAACTTGATTCATCATTAAGAAGCCTTGGTACTACCCTTATCACCAAAAGATCCACTGATAGTGTTTCTTCTCTTCTTGAAGTTATCAAATCCACTGGGGCTACTCAGGTCTTCTTCAACCACTTATATGATCCTTTGTCACTTGTCAGGGATCACCGTACAAAGGAGGTTTTAACTGCTCAAGGAATAGCTGTCCATTCCTTCAATGCAGACTTG…
>F01_transcript_101884
ATGGCTTCTTCCTTTTCAAATCCTAACAACAACAAACTTGTCCCGTGTTCAGTTCCCGTCAATGTCGGTTGCGACCCAAACTCACCGACCAACACCACCTTCGTCCAAGCCGACCCATCAACCTTCCGGGCCGTAGTCCAAAAACTAACCGGAGCCAGCCCAGACCCATCAGCTCATAAGCTTCCGGTTACCGTCCCCTCCCGCTTAACCGCCGGAAAAGCCATCTCCTGCGAGATGGGTCCACGGAGACCAGCATTCAAGCTTCAAGAACGAAGACAGATTGGCGGAAGAAAGCTGGAAATTAAGCTAAACAACAGCACCAACAACGGAGTGGTAGGGTACTCTTGTTTCTCCCCAAGGCAAAGGATGATGATGATGATGGTGAATAATAATGGAGTT…
>F01_transcript_101887
ATGTCTTTGTATTTGTTATACGAGTTTGCGTCAGGGTATTCTCTGTTTCATGGCCATGGACTTGACGAAATTGGACAGAACACAGAGGCAGTTCAGAACTCCGTAGCCGATCTCAATCGATTAGGGAAAGTAGTAAAACTGGTGGCTTTTAGCCCATTTGACTCAGCTCTGGATGCTCTCAATCAAATGAACGCTGTCTCCGAAGGGCAAATGACAGATGAGTTGCAGAACTTTTTGGCACTTACTCTCCCCAAAGTCAAGGATGGTAAGAAGCCTAAGTTCAGTGTAGGAGTAGCTGAGCCTAAGCTCGGTTCGCATATCTATGAAGTAACAAAGATTCCCTGCCAAAGCAATGAGTTTGTTCTTGAGCTCCTTCGTGGCGTGCGTTTGCATATTGAT…
>F01_transcript_101888
ATGGCCGATCCTAGGGTTTTCACCGGATCGATCGGTGGCCACCGTATACAAGCAGGTATCGTGTCTAGAATCCGATTAGAGAACTTCATGTGCCACAGTAACCTGGAAATCGAACTGGGTGATTGGGTCAATTTCGTCACAGGACAGAACGGAAGTGGAAAGAGTGCCATACTTACGGCATTATGTGTTGCATTTGGATGTCGAGCTAGAGGAACACAAAGGGCGTCAACTTTGAAGGATTTTATAAAGACTGGTTGTAGCTATGCACTTGTTCACGTGGAAATAAAAAACCAAGGGGAGGATGCTTTTAAACCAGAAACATATGGTGACTTAATTATTATAGAGCGCAGGATTTCTGAATCAACCAGTTCCACTGTTTTAAAAGATCACCAAGGGAAG…
>F01_transcript_101889
ATGGCGATGTTCGTAGCATATCGTCGATTAACAGGCAACGGATCGACGTCGTTGCGTCAAACAACTACTACTCTGAGATTTTTCTCCTCACCCTCTTTTAGGGAGGAAAGAGACACATTCGGCCCCATTCAAGTCCCATCAGACAAGTTATGGGGTGCCCAAACTCAAAGATCATTACAAAATTTTGAAATCGGGGGTGAGCGTGAAAGGATGCCCGAACCTATTGTCCGTGCATTTGGAATCCTTAAAAAATGTGCTGCCAAGGTGAACATGGAATATGGGCTTGACCCTTCCATAGGCAAAGCAATAATGCAAGCTGCTCAAGAAGTGGCTGAGGGAAAATTAAATGATCATTTTCCTCTGGTGGTATGGCAGACTGGCAGTGGAACTCAAAGTAAC…
>F01_transcript_101891
ATGACAGTTGATATCTCCTTGGCTAACGTAGATCCACGAATTGCAAGCATTCTTTGGATTGGGTACCCAGGAGAAGCTGGTGGCAAAGCGCTAGCAGAAATCATCTTTGGAGATTACAATCCAGGTGGAAGACTTCCCATGACTTGGTACCCTGAGGCATTCACCAGCATACCAATGAATGACATGCACATGAGAGCTGATCCCTCCGTGGCTATCCTGGAAGAACTTATCGGTTTTACACTGGTTATAGAGTATATGGATTTGGATATGGACTCAGCTTCACAAATTACAGTTACAAGCTCTTGTCTGCACCAAACAAACTGA
>F01_transcript_101892
ATGGATTACTCCTTCGATTCAAATGTCTCAAAGTCACCTTATGTTCTATTGCTCAAAGTGGCCACTCTCATACCAATTTCTCACTACTTGTTGGGATTTCTATTCATTTTTGTCACTTTTTTGTACAATTTTCTGGAGATCCATTTTCTTCAAGATTTTTTCAGTGGGTTTAGAGGGCAATCTGTGTTGTTGACTTTTAATTCTTGCTCAGAGCTCTACGAGGAAGTTGCCTCAAAATGTCAAATTCTTCATGGAAGGTATTTGGCAACGCCCTGGCTATCTAGCCCTCATTTTCAGACTGTTTTCTTAAGTTTCTTTGGGAGGGCTCCTTCTCTCAGATACAAAAGAGAGCTATTTAGAACGCCTGATGGTGGAACGATAGCTTTGGATTGGGCGATG…
>F01_transcript_101893
ATGTCTACCGGCGACGTCAAGGTCTCACTCCGAGATATACAAGTGGTGCAAAATCTTATAGAACGATGCCTTCAGCTATACATGAGCCAGAAGAAAGTTGTGGGTACTCTATTACAGCAGGCGAAAATTGAACCTAGTTTCACTGAAATTATTTGGCAACATCTTGAAAAACAAAATCAGCAATTTTTCGAGGCATATCATCTTAGACTAGTGCTGAAAGAACAGATATTAGAATTCAATCAGTTGCTTGAAAAACAGGCTGAGCTAATGCGTCAGGCAGTTGGAGTTGCCTCCGTTCCTATATCTAATGGATCTCAAATTTCACCAAATATATTGGAGAGCTACTCTAGGTCACCCTTCCTAACAACAGATATGGACAACTTCCTCAATCCCCATGGT…
>F01_transcript_101896
ATGGATTATGAAAGAATCGAGAAGAGATCTCAGCAGCAGCAGCAGCAGCAGCAGCAGCAGCAGCAAGGGAGTGGAGGAGGGTTATCTCCTGGGAAGTTGAGGAGTATGCTATTGTTGGGAGTAGAGAAGAAGAGAAAACAAGGAAAATCACTACAAGAAGAAGAGCTCGACCCCACTTTTTCCTTGAGATCTCAAGTTTCCGAGATCGATGACTCTGGTGTTTGCTGTTCCGAGAGTTGCAAAGATGTAGATGTTGTAAGTGTTCTTCCTCAATGCTTAACCTCCACTACAGCTGACTCCTTGGCTATGGAAATGGTTGGCAGTCGTAGAATGAAGGATCACCCTTTGTTCAATCCAAGATTTAGGTCTCAAGATGACAGTTACTTAGATTATGACAGT…
>F01_transcript_101899
ATGACAAGACTGGAGTTTTCTCATTACGACTACAAACTAAGAGGAAGCATATCAGCCAAAGATTTTACCTTGTCAATGGTTGCATCTGCTGATCTAAGTCATTTAGGCAAGTTGCTTGATCGGGTCGATGATATAGACAATGAGCCTCGTCTTAATGGTATACGCATTACATATGAGGAATTCAAGAACTTTGGTGAGCTGCGTAGGAGATTACAGCCATTTTCGCTGGCCCTTTTCAGTTATGGGCAAGTAAATGGGCTGTTGACAAAGAAGGATTTTCAGCGAGCTGCTTCCCAAGTATGTGGGATCTCCCTGACTGACAATGTAATTGAAATCATTTTCCATGTATTTGATAAAAACCACGACGGGACTCTAAGCTTTGATGAATTTATAAGAGTT…
>F01_transcript_10190
ATGTCTAAACAAAATCTGGTGAAATTTGTTGGTATGAGTATAAAGCCTTACTGGATCACCAGGCCATCACGAAATGGCTGGGAGGAGTCAAAAGGTTTTATAATATTTTCATTGACTAGTGGCCCAGAATACCATGTTTCACGGATTGAGATTGTGTATGACTATGGAAAAGAAGAAGCTGAGGCACTGTGA
>F01_transcript_101901
ATGCAAACTCGGTCTAAGAAGCCAGAGTTGCTTTATTTGGAGGACGATATCGAGAAACGGTTTCAAAGGCCAAGTAAGTGGATTAAAGACACTAAGGAAAACTTTGAGAACTCTGAGAAGGAAGAAATAATGGATGCAGAAGATCAAAAAGCGCTGAGGGATTATGCTACTCCCAAGGTGATGGAGCTTCAGTCGAGTATCACCAGGCCGACGATTGCTGCAAATACTTTTGAGATCAAGCCTGGGACTATACAGATGATTCAGAACTCAGTTCAGTTTCAGGGATTAGCCAACGACGATCCAATTGAGCACTTGGTTAGCTTTTTGGAAATATGTGACATCTTTAGATACAATGGGGTGTCAGATGATGCAGTCAGATTTCGCTTGTTCCCGTTCACC…
>F01_transcript_101902
ATGACATTGAATGCCATTGTTTATCTCCATATGGCATTTCCCACACCTATCATACATAGGAATATAAAGCACAATAATGTGATTATAGACCAGCATGGCGTGGCTAAACTGTTTGATTTCTCAATTTCCATAGCACTTCCTCCGGGGGAATTGCAGGTGGAAGGTCAAATGAAAGGAACACTTGGCTATCTAGACCCTGAAAACTTCTTGTCAGACTTTGTCTCTCAAAAGACCGATGTCTATAGTTTCGGTGTACTTCTGCTCGTGCTCTTAACCGGGCAGAAACCTTTATTTCTGGATCATGAAGATAAATTCGTAAATATTGTGGACCGTGTGAATGACTATGTACAAGAGGATCGTTTGAATGAAGTTATTGATTCCAAAATATCTTATGAGAAT…
>F01_transcript_101903
ATGCTGGCTAAAGCTATTGCAAAAGAATCTGGGGCTGTATTCATTAATGTGAGGATAGCAAATCTAATGAGCAAGTGGTTTGGTGATGCGCAAAAACTCGTGGCTGCTGTATTTAGCTTGGCCTATAAACTCCAGCCTGCTATCATATTCATTGATGAGGTGGACAGCTTCTTGGGCCAGCGCCGGTCGACTGACAATGAAGCATTAACAAATATGAAGACTGAGTTCATGGCTTTGTGGGATGGCTTCACTACTGACCAGAATGCGAGGGTGATGGTTCTTGCCGCGACTAATCGTCCGTCAGAGCTTGATGAAGCAATACTTCGACGTCTTCCTCAGGCTTTTGAGATTGGGATACCTGATTGCAGGGAGAGAGTTGAGATATTGAAGGTCGTTTTA…
>F01_transcript_101904
ATGCAGTTAAAAGAGGTTAAAGCAACTGTGGGTGCACTGCTAAACACGAGTAGCTTAAAGTGGCCAACCACATTTGATCAGCATAGGCAGAAAGAGGAATTGGATGTTCTTGATTGGCTAATGGCCATGTTTGGATTTCAGAGAGATAATGTCAGGAACCAGAGGGAAAATTTGATTTTGCTGCTTTCCAATGTTCATATAAAACTTATTCCCAAGCCTGAGCCACTTAACAAGCTTGACAATCGAGCAGTCAATTTGTGA
>F01_transcript_101908
ATGAAAGCTGAGGACTTCTCTTATGAATGTCACGTATGTGCATTTTGGATCCATAGTACTTGTGCTTTTTCACCAACCACCGTCACACCTAGTTTTCACCGTCACCCTCTATTCCTCAAATATTCTCTGCCTGTCATGGATCGTAAGAGTATCCCACTTTGCTGCCTCTGCAACGAAGTCGTGTTGCAAAACTCTTGGGTTTACTATTGTCATAAATGCAGATATTTTGTTCACATGGAATGTGGTAAATTGTCGGAGGAAGAATATTCTTCAAGATATTGTGAAGAAGAGATTGCAGCAGACCATGACATACCTAATTTGATACACTTTCCGGTGGATAATAAGGAATCGTTATTGGATCTAATAACAGACCATATTGGCAAGACCAATATTATTAAT…
>F01_transcript_101909
ATGGGAAAAACGAAGGGGTCCATGCTTTTTATCGTCCAGATCAGAGATGCAAATGGAAATATATGCCCGAATGTTCGTATAGCTGATTGTGGTCATAAGATTGGTTTAAATGGTGTTGACAATGGTCGAATCTGGTTTGATAATATCCGGATACCTAGAGAGAATTTGCTGAATTCAGTAGCTGATGTTTCTCCAGATGGCCAGTACCTAAGCACAATAAAGGACCCAGATCAGAGGTTTGCTGCATTCATGGCTCCTTTGACATCAGGTCGTGTAACAATTTCATCCAGCGCGGTTTATTCAGCTAAGATTGGTTTAGCAATTGCCACAAGGTACTCATTGACAAGGCGTGCATTTTCTGTTATTCCAAATGGACCTGAAGTCCTTCTGCTAGATTAT…
>F01_transcript_101910
ATGGCTGGGGGTAGAGCAATCCACCAGTTACTGAGGGCGAGATTCCAATCTCAATCCATTGCCCCTCCAGTTTTGTCATCCCTTATGGCAAGGAAAGATCAAGAGGGAGTTGGATCTGCTGGCATGAAGTTCCTGAGAGCATTTGCCCTCCTTGGAGCTGGTGTATCGGGGCTTTTGAGTTTTGCAACAATAGCATCTGCTGATGAGGCTGAACATGGTTTGGAGTGTCCAAACTATCCATGGCCTCACCAAGGCATTCTCAGTTCATATGATCACGCTTCGATTCGTCGTGGTCACCAGGTGTACCAACAAGTCTGTGCATCCTGCCATTCAATGTCCCTAATTTCATATCGTGACTTGGTGGGTGTTGCGTACACGGAGGAGGAAACAAAGGCCATG…
>F01_transcript_101914
ATGAGAGTATTTCTGCCCAAGGTTAACTGGGAGCAGTTGGCTTCCATGTACGTCATGGGTCGATCTGGCGCAGAATGTGAAGCAAGGTGGTTGAATTGGAAAGACCCATTAATCAATAAAGAATCATGGACAAAATTGGAAGAAAAGAATCTTTTGTATATTGTTCAACAAAAGGGGATCAGTAACTGGATTGATATCTCGGTATCATTGGGAACAAACAGGACCCCATTTCAGTGCTTGGCACATTATCAAAGGAGTCTTAATCCTTCAATACTGAAAAGGGAGTGGACGGAGGACGAGGATGATAAACTTCGCACAGCTGTTGAAACTTATGGTGATCGTGACTGGCAGCTTGTTGCTGCTGCATTGGAAGGACGGACAGGTACCCAATGCTCTAAT…
>F01_transcript_101915
ATGGCTGATCGTAACTTGGCAGTTGTGAAGCCGATATGGATGAAGCAAGCTGAGGAAGCAAAGCTGAAGAGCGAGGCCGAGAAGACTGCTGCAGCAAAGGCGGCATTTGATGCTACATTCAAGAATGTGGACAAGAGTCGTGAAGCCCCAGGGGATTTGTCAGATAGTGATGCAGAGGAGGCTGAGGACTTGGCAAACAAGCCAATTGGTCCGGTGGACCCAGCCAAATGCACAGCAGCTGGGACTGGGATTGCTGGTGGCACTGCGTGTGCACCGTCGTCATTTGTAATTGTGACCAAGGATGCTGATGGCCGTAAAGTGCCCAATGGTGGTGCACAGATAAAAGTCAATGTTAAACCTGGACAGGGTGTGGGGGCAACAGAACAGGAGGGGATTGTA…
>F01_transcript_101917
ATGATTTTAAAGACATTCTGCGCATTCTTAGCGCTTGTATTGGAGCTCTTTGGTGTATATGGTGACGGGGAATTCAAGTGGAACAAAGGGTACCCATACATGGCCGTAGTATTGAACTTTAGTCAGATGTGGGCTTTGTATTGCCTTGTACAGTTTTACAATGCAACTCATGAAAGACTTAAATCAATAAAACCCCTTGCAAAGTTCATCAGCTTCAAGGCTATTGTGTTTGCAACTTGGTGGCAAGGTGTTGTTATTGCTTTATTGTGTTCTCTTGGAGTTCTGCGTAAGGAAGGAAAGCTACAGACTGGATTGCAGGATTTCTTGATCTGTATAGAAGTAACTTGCTACAATTTATAA
>F01_transcript_101919
ATGAGAGCTGGGATGAGCTACTTCCACGAAACAATCTGGAAGGGCGTTCCCAAATTTTTACGACGTGTTGACACAGCTTTGAAGAACATAGGGATAAGTGAACGTGTTCCATACAGTGCTCCTCTTATCCAATTTTCTTCCTGGATGGGCGGTGATCGTGATGGTAATCCAAGGGTTACTCCTGAGGTCACAAGGGATGTTTGCTTATTGGCACGAATGATGGCCGCTAACTTGTACTTTTCGCAGATAGAGGATCTCATGTTTGAGATGTCCATGTGGCGATGCAGTGATGAGCTTCGGTTTCGCGCAGAAGAACTCCACAGATCTGCTAGGAGAGATGCAAAACACTACATAGAGTTTTGGAAACAGGTTCCTGCAAGTGAACCTTACCGAGTTATT…
>F01_transcript_101922
ATGAGTTTATTTACTCTTTCTGGAGTTTTCCTTAAGCTTTCAAGGCTCATTTTGAAGGTATGTAAGTGGGTTTTGGTAAAGATGTCTTTGAATTGCAAGGTGTCGCCCGGCACAAATAGCAAGTTGTCTGCCAATATCAAGGTCAAGAAGGCAAATGAACCTTTGCATGGATCTAATTGTGGCTGGATATGGAGAGCACTACTTTCCTTTATGTTCCTTCTTGTTCTTGTTGGGCTCATTTGGTTCATATCCTGTTCGAATGATGGGGTTTTTAGGAAGAATGGGGACACTAGAGATTTTTGTGAAAACAAACCTGGAATCTTGCTTGAACATTTCAATGTCAGCAAAGAACAACTTGATGCGTTGGCTTCTTCTTTCTTCGAATCGGATCAGATCACG…
>F01_transcript_101923
ATGGCTGAAATACTTGTGCAGAGAGCAGCTTCCCCGGATGAATTTACTCGGTTAACTGCTATTACTTGGATAAATGAGTTTGTAAAACTTGGTGGGGACCAGCTTATTCCTTACTATGCTGATATTTTAGGAGCCATTTTGCCTTGTATAGCTGATAAAGAAGAAAAAATACGAGTTGTTGCTCGAGAAACTAATGAAGAACTTCGCACTATGGAGGCTGATCCAGCTGAAGGATTTGATGTTGGAGCAAGCCTCTCTATTGCAAGGAGGCAGTTGTCTAGTGAATGGGAGGCTACTCGAATTGAAGCATTGCACTGGATGTCAGCTCTTTTGAACAGACATCGTGCGGAGGTTCTAACTTTTCTGAATGATGTTTTTGACACTCTTTTGAAGGCACTA…
>F01_transcript_101925
ATGAATAGTCGAACCAGTATGGCTCAGAGGGAAGATGTTATAAGGAGGATAGTTTATGTTTCTGACATTGATCATCAGGTTACTGAAGAACAACTTGCAGTTTTATTTATTGGTTGCGGGCAGGTTGTTGATTATCGTGTTTGTGGTGACCCTAATTCTGTTCTCCGCTTTGCATTTATTGAGTTTACTGATGAGGAAGGTGCAAGGAATGCTTTGAGTCTGGCAGGTATTATGCTTGGTTTTTACCCAGTCAGGGTGCTGCCCTCTAAAACTACAATTGCACCTGTTAATCCAACTTTTTTGCCACGGGCAAGGTGA
>F01_transcript_101926
ATGGCTGTGGCATGGTTGTTTTATTTGGTGTGGTTGTGTATCTCATTTAGAGAACCCGCTCGCCTGATCGAGGAGACTCATATGCCACAAGAAGCTAATGCTGTTTCAGGAGATAATGATGAGCTTGAAAAAGGTATTGATCATCCATTGCTCTTGAGCTTAGAGAGCAATCAACAAGATGACGATGATGACCAGGAATATGATGCAAGTGAAGAAGCTCCTGAGGAATCTCGTGGACCAGCCAACTCTATAGGATATGCATATAGATTACTTACTCCTTCAGTAAAGGTTCAATTGTTGATATATTTCATGTTGAAATATGTGATGGAGATTTTACTCTCCGAATCAAGTGTCATTACCACATATTATTTCGGTTGGTCTACCAGCAAAGTGGCAATC…
>F01_transcript_101927
ATGGCTGGTTTATATCGACGCATCCTTCCATCTCCTCCTGCCATCGATTTTGCTTCAGCCGAAGGAAAACAACTTTTCATTGAGGCCATTCAAGGTGGGACGATGGAAGGCTTTTTTAAGTTGATCTCTTATTTTCAGACACAATCAGAACCTGCATATTGTGGTTTAGCCAGCCTTGCCATGGTCTTGAATGCCCTGGCTATTGATCCCGGTAGAAAATGGAAAGGGCCTTGGAGATGGTTTGATGAATCTATGCTGGACTGTTGCGAACCTTTGGAAAAGGTTAAAGCTAAAGGCATCTCCTTTGGGAAGGTTGTGTGCTTAGCTCACTGTGCTGGCGCAAAAGTCAATGCTTTTCGCACACATCAAAGCAGCCTTGATGACTTCCGTAAGTATGTC…
>F01_transcript_101929
ATGCTTAGTAGGCTGCACCACCGTAACCTTGTGAAGCTTGTCGGTTATTATAGCAATCGCGACTCTTCACAAAACCTACTTTGTTACGAGCTTGTTCCTAATGGAAGTCTGGAGGCATGGCTCCATGGTCCCTTGGGACTAAACTGTCCTCTCGACTGGGATACCAGAATGAAGATTGCCCTTGATGCTGCACGTGGCCTTGCTTACCTACACGAGGATTCACAACCTTGTGTTATCCACAGAGATTTCAAGGCATCCAATATTTTACTCGAGAACAATTTTCATGCTAAAGTTGCTGATTTTGGCCTTGCAAAACAGGCACCAGAAGGCAGAGTAAACTACCTGTCTACGCGTGTTATGGGTACATTTGGGTATGTAGCCCCCGAGTATGCTATGACT…
>F01_transcript_101930
ATGGATTTATGTTGTGGGAATTTCTGTTTTTTCATCATGGTTCTCTTGTGCTTGAATCAAAGCAATGTGGAAGGAAGATATCACTTTCACAAGAATAAATCCCCTGTTTATGCTCCTAACCCTGAATCCCCTGTTTATGCTCCTCCCAATCCTGAATCCCCTGTTTCTCAGTCTCCTCCTTATCCACCCCCAATTCCTTCAGACCCCAACAATGATCCAATTCCTGAAAACCCAAATGACCCCGGAAATTCCACCTCGGATTGCGTATTCGACGTGACATCTTTCGGGGCAATTGGAGATGGCTCAACTGATGACACTGATGCCTTCAGGGATGCTTGGAAGGCAGCTTGTGCAATAGAATCAGCTCTTCTTTTAGCTCCTGCAGAGTACACATTCATG…
>F01_transcript_101932
ATGGAACATTTTATGTTCTTTGCTGTAAGTAACAATGCAGGAGTTATGGCAACCCCGTTCACATTTTCAAAAGACAATATAGAGCTACAGTTTGCAACAAACCATTTGGGTCGTTTTCTTTTGACAAATCTATTGTTGGAAGCCATGAAGACAACAGCACGTGAAAGTAGCAAAGAAGGAAGAATTTTGAATGTCTCATCACGGCGCCACCAGTTTACATATCCTGAAGGGATTCGCTTTGACAAAATTAATGATTAG
>F01_transcript_101933
ATGCAAATTACACATACTCCATCGAGACCACAATTAACGCTGGCATTGACATGGTCATCATGGTACGTACCACATAATTATACAGAATTCATTGGTGGTCTATCCTTCCTGGTGAAGAATAAATTTATCCCCATGAGCCGCATTAATGATGCAGTGAAGAGAATTTTATGGGTAAAGTTTGTGGTGGGTCTATTTGAGACCCCCTTGGCTGATTTTAGCATGGCCAAGTACTTAGGAAGTAAGGAGCATAGAGAGCTTGCAAGGGAAGCTGTAAGAAAATCTCTTGTGCTGCTGAAGAATGGCAAATCTGCAAACGAGCCTTTGCTTCCCCTTCCTAAAAAGGTACTAAAAATACTTGTGGCAGGAAGTCATGCCGACAATATTGGATATCAGAGTGGC…
>F01_transcript_101934
ATGCTTACCTCTTCAAGTACATCATCATCGGAGATACCGTTCACCGACAAACGCTTCCAGCCAGTTCATGATTTAACCATTGGGGTTGAATTTGGGGCCAGAATGATCACAATCGACAATAAACCAATAAAACTGCAAATTTGGGACACGGCGGGTCAAGAATCATTCCGGTCTATCACAAGGTCCTACTATAGAGGTGCTGCTGGTGCATTGCTAGTTTACGATATCACAGAGGAGGCATTTATAAGCACAGCGGCAACAATCTATAAGAAGATTCAGGATGGAGTTTTTGACGTATCAAATGAGTCTTACGGTATAAAAGTTGGATATGGTGGCGTCCCAGGGCCGTCAGGAGGAAGAGATGGTGCTGCTTCTCAAGGAGGTGCATGTTGCAGTTGA
>F01_transcript_101937
ATGGAACCCAATGCTGTGACATACAACACTATTCTCCATGCACTTTGTAGTCATGGGTGTTGGAGTGAGGTAGATGAGATCCTCTTTTTCATGCATGAAACTTCTCATCCACCCACTGTTGTTACGTACAACATTTTGATAAATGGTTTATGCAAGTATGGGCTTGTGGGACGTGCCATTGACTTCTTTGATCAGATGGTTTCTCGAAACTGTTCTCCTGATATAATTACTTATAACACCCTCCTACGTGCTCTTTGTAGAGAGGGACTGATAGATGAAACCCTCCAAATTCTTCACTCTTTAAGTGATACCAGCTGCTCGCCTAGTTTGATCACTTACAATATTTTGATTGATGGACTTGCAAAAAATGGTTACATGGAGAAAGCTATGGAGATATAT…
>F01_transcript_101938
ATGGACTTGGTTGAATTTTTGGGTTCCTTTGATTGGGAACATGAATCGTTTCCAAAGTATGAAGATTTTGCAGTTCTTCCCTTATTTGCCCTGTTCTTCCCTACAGTGCGCTTCTTTCTCGACAGATTTATTTTCGAGAAAGTGGGAAGACTGTTGATATTTGGAAAGGGAAATCAGAAGCTGGATGTTGAGACAGATGAGAGGAGAAAGAAGATACGAAAGTTCAAGGAATCAGCGTGGAAATGCATTTATTACCTTTCAGCAGAGATTCTAGCTCTTGCTGTAACCTATGACGAGCCTTGGTTCACTAACACAAGCAATTTTTGGACAGGACCTGGAAATCAAGTATGGCCAGAGCTTAAAATTAAGTTGAAATTGAAAGGACTTTATATGTATGTT…
>F01_transcript_101941
ATGGCCAAGGGGAAGGATGTCCGAATAACCGTTATTTTGGAATGTACCAGTTGTGTTCGAAACGGTGTTAATAAGGTATCAACGGGTATTTCCAGATATATTACTCAAAAGAACCGGCACAATACGCCTAATCGATTGGAATTGAGAAAATTCTGTCCATATTGTTACAAACATACGATTCATGGGGAGATAAAGAAATAG
>F01_transcript_101943
ATGGTGATCCACCAATTTCTGGTGACTGCTGGTATAACTTCACTTTGGATGATATTGCTGGGGAAGACAAAAAGCATCATCTTCGTAAGTAACTTGACACAAGCTCTAGGGCAGACAACAGACTGGTTCAGAAGAGCCTTAGCTGTTGAACGTGTAAGAGGGAACTTGCAGTTAAGTGGGTATTCTGCATGTGGACAAGACGGAGGTGTACAACTTCCGCGGGAGTATGTAGAAGGTATTGCCACTGTAGCGAATGTTTGTGTATTAATTATCACATTTCATGTTATTATTATACTGGATTATATAGTTTGA
>F01_transcript_101945
ATGCAAACATGGATATTCATGTTGGCCAGTCATAATTCGTTTCTAGTCACAATGGATCAAAATGCTACCAATGATTATTACATCGTTGCCAGTATCACGGTTTGTCAATTCCTCTGCTTGACTAGAGCTAAAGGCGTAGCCATCTTGCACTACTCCAATTCTCAAGGGCCTGCTTCAGATGGAATGTTTCTGCTATTGTTGCTCATCCAAATCCTCAAGGATCTTTCAGATATGGTCAGATTACTATAA
>F01_transcript_101947
ATGTCATCGACTCTACTGGAGCTGACCCGCGCGGGTCATGAGGAGGTGGAACGGCTGGAGCGAATCATCGTGAAGGATCTCCAAACCGACCCGACCTCCAACAAGGACCGTCTCTTTCAGAGCCACCGAGTCCGCAGTTTGATCGATCAAATCTCCGATACCACTCACAAACTTGTTGAGATTTATGAAGATAAAGATAGTGCGAGGAAAGATGAGATTGCTGCACTCGGAGGTCAAACAGCAGCTGGAATTAATTTATTTAGCGCATTTTATGACAGACTAAAAGAGATTCGGGAGTATCATAGACGTCATCCTGCTGCTCGTGTTCTTGATGCCACTGACGAGTATGAGCAGCTACTCAAAGATGAACCACAGATTGAATTCAGTGGGGAGGAAGGT…
>F01_transcript_101948
ATGAAGATTTTGGTTCCAAGAAAGATGCCACAACTTCCACTAATAGCAAAGGAATTGGAAATTTTGAATGTGGAAGCAGATGGGAAGAACAGTGATAAGGCTAATGCAACCCGGTCGAAGCATTCGGTCACTGAGCAGCGACGGAGGAGCAAGATAAATGAAAGATTTCAAATATTGAGAGAACTGATACCGAATAGTGATCAAAAGAGAGATACAGCATCATTCTTGTTGGAGGTGATTGAGTACGTTCAATATTTACAGGAAAAGGTACAAAAGTACGAGGGATCATACCAAGGTTGGAGCTCGGAGCCCACAAAGTTGATACCTTGGGTAATTCATTGA
>F01_transcript_101951
ATGATGGAAGTTGATATGGTTGAACAGAAAGATAGGAAGACGATTAATAATACTGGTGTCGCTTCTGGAGATCTTATCCAAGCACCTCTTGGGTTGTTTCCGCGGCCTTGGCCTACAGGTGCAGATGGTAGTCAGTTGAACAAAGTAATTGAATACTTCAGGCTGCTTGGGCGTGTTTTGGCCAAGGCTCTTCAAGACGGACGGCTTTTGGACCTGCCATTATCAACTGCATTTTATAAGCTTGTACTTGGTCAAGAGCTTGATTTGCATGATATTCTTTCTTTTGATGCCGAACTGGGGAAGACATTACTTGAATTGCAAGCTCTTGTTTGCCGGAAACAGTACCTAGAATCAAGGGTTGGTCAAGATCATCAGGTTATTGATATACGTTTCCGTGGG…
>F01_transcript_101952
ATGACAAGGTCTTCTCCCACTTCCTCAACAACCTCATCAAGTAGTTTAAACATCAAAGTAGCATCTTTAATTGCATCAGATGCATCAACAGATTTCAAAAATACAGTTCCATGGGGGTTGTTTACAAGAAAGTTTATTAGCTGTCTTCCCCTAATATCTTTCCAACCATCCGACAAGATTGACACCCCTGTATGTGCCCAAGTCTTTTTTACCTCCTCAACAAAGGCCTTTGTAGTCTTCTCTTCCTCCTTCAATATCCAAGAGCTAAGCTCGTATGGGGTAGGGGGTTTCAAAGCACAACCATAG
>F01_transcript_101953
ATGGGGGCTGCTTGTTGCGTTGCTGCTAAAGATGGAACTATACCCAATGGATCTGGCAGTGAGATGTTACAGAGGAATGTTCGATATTCACCATCATGGAGCTTTCGGTGGGATAACCGGGGGCGAGTTGCTGGGGAAGAGACGTCTGTGAACTGGTTATCTGATGGAGTCAGCAGGAGTGATGGGTTGGACGTTAAATCTCGTACAACTTTAGAAAGTGCTTATGTATCAGAAGAGGGAAGTCCGTTGGACAGTTTTCGAACACTTGCATTACAGAAGTCCCCAATTCCTGAAGGAAATAGAGGGCTTATGAGTTTTCCTCGTTCAGATCTGCCTATCTCCAGAAATTCCACGGAGGTGAAGGAGTCAATGGAATCCCCTGCTATTTCAGATCCATCT…
>F01_transcript_101954
ATGTCTAGTGACTATGAGTTGCATAGTTGGTTCACATACTCCAAGCTTCTATTATTTCTAAGTACTGCTGGATTTGGGATGGCAAGGTTAAATGAAGGATTATCACTGTTCGATGCTATACTTATAGTCCCTATGTTTCAGATTGCTTGGACTTTTTTCTCCATTTGTACAGGAAAGGGCTACTGCTCAGAGGCAGCAGCGGTTATCGACTGTCCGTTGAGAGCTTGGTTTGCAAATGTAATTTAA
>F01_transcript_101958
ATGCAAGATGAACTTATTACTTCACCAGTTGATATTGCAAGAGCTTATATGGGAAGGCGAACATCAGAATTTGGCCCTGGTTCTTATAGCATTATATCAAAATCTGCAAGACCTCTATACAAGGGTGATGATATACAATCAAATACCTTTATTCCACCACCGTCGCCCAAGTCATCCACTTGTTGGCCAGGTGCAATGGTACAGGAGCAGCGTGGTTATACAACCCCACTAAGTCAGGGAGGCACCTTCCGACTTTGTAACTTTCCACGAACTCCATATTCCAGAACCATCTATTCTAAGTCCAAGGCCAAGCTGCCTCAATTACAAGCTGAGAGCAGCCTAAACATTTCATCGAATCCCTTTCAGCAATCCCGGACTCCTATCTTTGAACAGGTGAAA…
>F01_transcript_10196
ATGGACTCCGCGGCCATGACTTTTTGTACCAAATCTGTTTACTATCCTCCAAGTTTATTCGCGGGGAGCGCTTGTGGGATTAAAAGCTCCCAGTGTAGTTTTATGATAGGAAGTAAAGTGAAATTCCCCAGGCAAAAAGCTCAGGCTTATAAAGTTAGTCGTAAATCTGGGAAACGAGGGGGTGCTCTCAGTGCTACTTGTCGTGACGATAAAATTCTGGTGGCAAACAGAGGAGAGATTGCTGTCCGCGTGATACGAACTGCTCATGAGATGGGTATACCTTGTGTTGCTGTTTACTCAACCATCGATAAGGATGCACTTCATGTGAAATTGGCCGATGAATCAGTTTGCATTGGTGAAGCACCAAGCAGTCAATCGTATTTAGTGGTCCCAAATGTC…
>F01_transcript_101960
ATGGCGAAATTCATTTCTTCTCCTCCGATCTCATCTTCCGGTGCTGAAGCTGATACTGACAGTTTCGATGACGTCTGCAGCATATGTCTTGAGCCTTTCAACCTCACTCAAGATCCTCCGACTGTGACCAACTGCAAGCATGAGTATCATCTCCAGTGCATTCTTGAATGGTCACAAAGAAGCAAAGAATGCCCAATATGCTGGCAGATTCTTGCCTTGCAGGAGCCTGCCAGCCAAGAACTTCTAGCAGCAGTGCTGAATGAGAGGAGCTTGAGGTCAAGAATCAAGGTTCACCATATTTATGAGGATCATGAGATAAACCATGTGGATGCTCCTTATGAGGATGTTTCTGAATTTGATGAGCGTATTATGCGGAACTTTGCTGCCGCTGCAAGTAGA…
>F01_transcript_101963
ATGATTGAAAAATGTGTTAACAAAATTAGAGAAAATGTGAAATATGTGAAAGGGACAAAAGGAAGATTGATAAAATTTGTTGAATGTGTTGCTCAACTCTCATTGAAGTGTAGTAAGAAACTTCGTCAAGATGTTCCAACAAGATGGAATTCAACTTACTTAATACTTGATAGTGCTTTGACATACAAACTTGCATTTTATCAGTTACAATTAGTTGACTCAAATTTCAAGGATTGTGCAACGGAGGAAGAATGGAAAACAGTTGAAAAAATTGCTAAATTTTTGAAACCATTCCATGATATCACTACTCTTTTCTCAGGAACTCAATGCCCTACCTCTAATCTTTATTTTCATGGGGTATGGAAGATACAATCCCTTATTTACGATGAGATGGATGAT…
>F01_transcript_101964
ATGGCGGCAGCTTCGGCAGTTGCAGCAGCTTCCATAAACGGCGTAAAAATGGCTGCAACATCACAAGCATATTTGGAGAGCAATCAAGTGAGGGAAACTAAGAACTTGATAACGGAGCTGTGCCGTCAATTTTATACTCTCGGATGGGTATCTGGTACCGGTGGAAGTATCACCATTAAAGTCCATGATGACTCGATCCCCAAACCCCAACAACTCATCCTCATGTCCCCATCTGGTGTGCAAAAGGAAAGAATAGTTCCAGAGGATATGTATGTGCTATCTCCAAGTGGTTCAGTTCTATTTTCGCCTTTGCCCAAGCCATACCCCCATAAGCCCCCTAAATGTTCTGATTGTGCTCCTCTATTCATGAAGGCATATGAGATGCGTAATGCTGGTGCT…
>F01_transcript_101966
ATGGATGCTGGTAAGGCAATGTGGACAGCACTGAAATGCCGAGATATTTGGAGGCCATGTTTATACATGTACCTGTCACTTGCAGTGAGCTTGAACATTCATGAAGGAATGTTTTATTGGTATACAGATGCAAAAGCTGGTCCATCTTTCTCACAGGAGGTTATTGGATCTATATTCTCTGTTGGTGCAATTGGCTCCCTTTTTGGAGTTCTTCTTTACCAAAATGTTTTTAAAAGTTTCCCTTTTCGTCAAGTTCTATTTTGGTCTCAGTTGCTTTATGGTGCTTCTGGGTTGTTGGATTTGATATTGGTTTTGCGAGTAAACTTGAGATTTGGCGTACCAGATTTCTTTTTTGTTGTTATCGATGAGTTCTTCCACAAAATGATTGGACGCCTGAAA…
>F01_transcript_101968
ATGGGTTTGCACAATCCAAGGCCAATGTCTGGCTTGAACACAGCTAATGGGTATATGAATAGGATGTATGCAAACAAGTTGCACAGTCAGTATGGTAACACTTATAGATCTGGGTATTATGGATCCAATGGTTATGATCCCCGAACTGGTAGACGTGGGTGGTCGACTGTTGATAGCAAGTTCAAGCCAAGGGGACGAGGCAATGGTTTCTTGGGTTATGGTAATGAGAACACGGATGGTTTGAATGAACTGAATAGGGGCCCAAGAGCAAAGAGCACCAAAATCAAAAGGGCTTCACACCTATTGCATTAG
>F01_transcript_101969
ATGGCGAGAGATAAGAACGAGCTATACGTCACCGTTCCGAGCTTATTCAGGTGTCCAATATCCATGGACGTCATGAAATCTCCGGTTAGCCTCTGCACCGGCGTCACATACGATCGCTCCAGCATCAAAACCTGGCTCGATTCCGGCCATAACACCTGTCCCGCCACTATGCAAGTCCTCCAATCCACCGATGTCGTTCCAAACCTCACTCTCCGCCGGCTCATCCGCTGCTGGTCCGACTCCCTCCTCCTCCTCCCAGAGTCGCCCGCCGCTGCCGCTTCTCGGCAGTCGCCAATGGTTTTCTCAACCGTCTCGAAGCAACAGGTACTCGACTCGATCAAAAACGTCATCAACAAAAAATCAGAAAATTACTCAAATTCGTTCTCCGAAATTATGGAA…
>F01_transcript_101971
ATGGAGTTCACTTCGGATCCAAAACCCTCAGAAGAAGAGATGATTAGCTCGTATGTCAAAACCCTAGCTTCGGTTACTAGAAGTGAGGAAGAGGCGAAAAAGAAGATCTACTCTGTTTGTACATCGACATATACTGGATTTGGTGCTTTGATTACTGAAGAGCTTTCCTACAAAGTGAAAAGTAGAGATGCATTGGCAAAAATTGTGTACTCACGATTATTTGACTGGAGAACTATATCAATTATAAACCAAGTTCAGCTGGCAGAGATGACAACAGGATGA
>F01_transcript_101972
ATGACGATCGGAAGCCATAAACCAGCTAAAGAGAAGAAGTCAAGAAAGAGCAAAGAAGTGATTGCTGATGCTAAAATACCTCTTTTACCAACCAAGCACGAGGAAGATGTTGGGTTTGATGAGTTCAATGGGGCTTCCTTTACTGGGGCAGTTTTTAATTTGTCCACCACAATTGTTGGTGCTGGAATCATGTCCTTGCCTGCAACTATGAAAGTGTTGGGTCTTGCTCCTGGGGTTGCTATGATCGTCTTTATGGCATTCTTGACAGAGGCTTCGATTGAGATGCTACTTAGGTGTAGTAGGGCTGGGAAAACAAGCTCCTATGGAGGTGTTATGCATGATGCCTTTGGAAAGTATGGCAGGATATTACTGCAAGTATGTGTACTAGTCAACAACATT…
>F01_transcript_101973
ATGGAGATCGCACCGGCGCTGCTGGTGTCTCACGGCGGTGGAGCCGTTGAGGGCCACGCTATCTCTGCCGCCGATGACTCCCCCAAGACATCTGATTCCTCGACTTCGTCTTCATCGGAAAAGGAGAATACTAATAGTAATAATCTTAATACTGATAATAATAATAATGTTTCGAGCAAGTATGATGATGACGACGAGGAGGAGGATGTATGCCGGATCTGCCGGAACACCGGTGACGCCGAGAATCCTCTCCGGTACCCTTGCGCTTGTAGTGGAAGCATCAAATTTGTTCATCAAGATTGCCTCCTCCAGTGGCTCAATCACAGCAACGCTCGCCAATGTGAGGTCTGCAAACATGCTTTCTCATTCTCCCCTGTTTATGCTGAGAATGCTCCGGCA…
>F01_transcript_101975
ATGGAGTGTCTGGTTTTGATAAATCTGATCTGCAGCTTGACGTTTTTATGGTTCAGCATGATATGGAGAATGTATATGTGGGTTTTCAAGGAAAGGCCTGAAAATGCATTGGGTAAGATGCAACTACGGAGCTACATGAATGGGCATTCACGTCAAGGAGAGCGTCCCTTCCCTTTCAGTGTTGATAAGGGTTTTGTTCGTTCTCACCGGATGCAGCGAAAGCACTACAGGGGCCTTTCAAACCCGCAATGTGTTCATGGGATTGAGGTTGTTACATTACCCAATCTCATGAATCTTGATGATGATGAGCGCAGAAGGTGGATGGAACTCACAGGTAGGGACTTGAACTTCTCAATCCCACCTGAAGCGAGTGATTTCAGTTCATGGAGAACACTTCCA…
>F01_transcript_101978
ATGGCTACTGATTCGGAACTGGTTGAGCGCCTACAGACATTTCTCCGGACCTCCGACCTCAACACCACCACTGGCACCACCGTCCGCCGGAAACTAGAGAAAGACTTCAGCATCGATTTATCTGACCGGAAAGCGTTTATTAGGGAGCAAATTGGCTTGTTTCTTGAAACCCAGGTGGCAAAACCTCAAAACGACGACGTAGAAGAGGAGATTGGAGAAGAAGACGAAGCCAAAGAGTCGGAAAGTGTGAAGAAAGAAGAGAGTAATGACAACGGGCCTGAAGAAGAGGATGTGAATGTGGAAGAAGGAGAACCTGAAGTGGAAGTGGATGTGGAAGAAGAAGAAGAAGAAGATGATGATGAAGAAGAAGAAGGTGAAGATGAGAAGAAGGGGTTAGAC…
>F01_transcript_101982
ATGGTGCCAGAAATCTTTGTTGCAATTTATACTGGTATCATGATAAAAACTTTGGCTGATGCTTCAAATGATCACCACACACTAACAGCACCCCAGATCATCTTCAATGTTCTTGGCTTCTGTTTAACGGTGACTACCACAGTAATAGTTACAATCTATGCAAAAAGGCGGCTCAAGGAGATGCAGAAGGAAGAAAAATTACTGCTGCAATAA
>F01_transcript_101983
ATGGGTCCACAAGAGCCCTACTGGCGAACCAATACAAGCTTCTCTCCTCCCCCATCGAGATGGGATTTCCGGTTCCAACCTGAAGGGCCATCATTTGGTTCTAATGAGGGAAGTCAGTTGTATGGTTCTTCGACATCATCAAACAGCAGAGAAAGTCGAAGTTGGTTAAGAGGGAACCATCTTGCCAATCACCATTATACTGCATCTGATGGTGCTGGCCCATATTTTAGTAGTCCATCTGACATATCTCCAATCCAGCAGTGGACTCCCCCAATTATACAGGAAATTAGTGTAGATGATTATGGAACTTCATCAAGGAGAGTTTCAGGCCAGTTGTCCTTTTCGCCTGCTATGGAGGGTATATCTGCAGTTCGGGACAGTGTTGGGTCTACTTCATCC…
>F01_transcript_101985
ATGGCAGACTTACCGCGTTATGTGATAGCCTGCTTGCAGACTGGGAAACTTGCTTCCCTGGCAATTTTGGTCTCTGGTGGGATAGTATTACAAATATTGGCATGTGCGTTGTACCATAATTGGTGGCCTATGCTAACAGTGTTAATGTATGTGCTTCTTCCCATGCCTTTGCTGTTCTTTGCGGGATCTGATACCTCCTCTCTTTATTCTGAATCTGGAAACAGCTGGGTGGATGCTACTAAGTTTTTGACTGGAACATCAGCAGTTGGCAGCGTTGCCATTCCAATTATCTTAAAGCATGCTGGCGTTATTTGTTGGGGTGCTCTTGCGATGGAGCTCTCATCCTTATTCGTATTCGTGTTAGCCATATTGTGTTATATTGGTATGAACGATGATGAT…
>F01_transcript_101988
ATGGGAGATGACACAAAGTTCAATCCCCTTACAGGGAAGAGCAACGAAGCTGAATTTGTGCAATCTAGTGGTCTTCGAAAACGCAAGCAATCACACACTAGATCCAGTAGCACTGAGAGTGCTGTATTGCATCATTCTGAAGAAGAAATGATGCAATATGCTGAACCTGAGGGGCTTGAGATGTCTAAGCACGACCAGTTGGTTGTTGAGCATCAAATTCCTACGGGTTTGCATGCACAGGATGGGGGATGGATTGCTCGAATTGCAGCATTGCTTGTGGGAGAGGATCCTATGCAATCTTATGCACTTATATGTGGCAATTGCCATATGCACAATGGGCTTGCAAGGAAGGAGGATTTCCCGTACATAACTTACTATTGTCCGCACTGCAGTGCTCTA…
>F01_transcript_101990
ATGGACAGACACAGAGGCGAAGACCGCTATGGCAGCAGCAACCCAGATTCGAACCACTTCAGGCAGGCCAGAGCCCCTTCTCGTTCCTCCGATGATGACCCCGCCGTGAACTACCACCACAACCTTCGTAGCCCTCCTACCAATTACCACCAACCCGGATTCTCCAGCGGTGGTCGCGACAACCGTGCTTTTGACAGTCCGCCTCGTTTCCCTCCAGGTGGAGGCGGTGGTGGTGGGTTCCGTCCAATGGGCAGTGGTGGTGGAGATCGCGGTGGGCTCAATTCCAATCACCAGATTCTTCTCACCGGCCAGAAACGAGGGTTTCCATTCTCGGGCCGTGGAGGCTCTCCAGACCATCTTGATGGAGGTAGTTTTGCCAAGCTTTTTGTCGGTTCTGTT…
>F01_transcript_101994
ATGGAAGCTCTTCAGTTCATAAGATCAAGACACCACAGGCATGAAACTACAGAGTATCGGTGCACTTCATCTGTCTCTAAACACATTAAAGCTCCCGTTGATATAGTTTGGTCATTGGTTAGGAGATTCGATCAACCGCAGAAGTACAAGCCCTTCGTTAGCAGGTGCATCGTTCTGGGAGACCTTAAAATTGGGAGTGTTAGAGAGGTGAATGTCAAGTCAGGTCTTCCTGCCACGACAAGCACCGAAAGATTAGAACTTCTCGACTATACTGAGCACATCCTTGGCGTTAAAATAGTTGGTGGTGATCATAGGCTTAAGAACTATTCTTCAGTCATTACTGTCCATCCTGAAATGATTGATGGGAGGGCTGGCGCCCATGCCATTGAATCGTTTCTG…
>F01_transcript_101995
ATGGATGAGAGCAAGAAGTCTGAGAACCATTTGACATCCGCTGCAGCTTTCGTGGAAGGCGGAGTTCAAGAAGCTTGCGATGATGCATGCAGTATATGCCTTGAAGCATTTTGTGAAAGTGAACCATCGACGGTTACTGGCTGTAAGCATGAGTTTCATCTTCAGTGCATTCTTGAATGGTGTCAGAGAAGTTCCCAATGCCCAATGTGTTGGCAACCCATCTCTCTGAAGGATCCCAACAGGTTATGTTGCATTATCCTATCACTTTGTTATTTTTGTTGCTAA
>F01_transcript_101996
ATGTACAAAAAGTCGTACTCTTCGGCTAGTTTTTCTCTCGCCAAGAGAGCTTTTTCTTCTTCTCGTCCTATCTCTAAACCCATCTCTACGATTCCTCATCAGTCATCTCCTCCCTGTGTATCCAACCAGTACCGATCGCTCTGCTTCTTCCGCTCTCTCCCCCGGTGGAGCCACGGCGTCGATTGGAAGTCGCCGGTGAGTCTTACGTCTCAGATCAGGACTGTCTCTCCTCTCCTTGAACGCCTCCAAAGAAAGTTCGCTACTATGGCCTCTGAGCATGCTTTCAAGGGAATCCTGACAAATCTTCCCAAGCCCGGTGGTGGCAAGTTTGGAAAGTTTTATAGCCTCCCTGCTCTGAATGATCCGAGGATAGAAAAGTTGCCATACTCTATCAGAATC…
>F01_transcript_101997
ATGGCGGATCACGATCTCTCCGCTCCCTTTTTACCTTCTTCTGGCCGCTCACAACCGTCCAGTGATGAGCCCCAACTGATCATCACCGTCCATGATGAAAACTCCCCCAATCAAGACCCACAAACCCAACAACAATCCAGTGATACCCATTTGGAGATACTTGACAACCCATTTGAGTTTCTTGGGTTAGATGGGTTTGACTTGCCTGGATCGACCACTGTGGATCCGTTTAGGAACCATACATTGAGAATTGAAGGGGTTTATGAGTGGGTAAAGATTGGAATTTGTTTGCCGATTGCGTTGATTCGGCTTGTGTTACTCGGGTTGTGTTTGTCGGTTGGATATGTGGCCACAAAGATTGCTCTTCTTGGTTGGAAGGATAAGGAGAATCCAATGCCT…
>F01_transcript_102
ATGAGTAGTTTGGTTGAGAGGCTCCGTGTTAGATCAGATCGCAAACCTGTTTACAACATAGATGAGTCAGACGATGATGCTGATATTGTGGATGGAAAATTGAAGAATGCTCAGAAGTTTGAAAAGATAGTCAGAACTGATGCAAAAGATGACTTGTGTCAAGCTTGTGCTGGTGATGGAGATCTTTTGGGCTGCGAAAGTTGTACTTATGCCTACCATCCAAAATGTTTACTCCCGCCACTGAAAGCTCCTCTTCCAAGCAGCTGGAGGTGCCCTGAATGTGTTAGCCCCTTAAATGATATTGACAAGATATTGGACTGTGAAATGCGCCCTAGTGCTGCAGACGATAATGATGCCTCTAAGCTGGGCTCAAAGCAAATATTTGTGAAGCAGTATCTT…
>F01_transcript_10200
ATGAGTGGCACGACGGCGACGCATGGTGGAGCGCACGCGCTGGCATTCAGGGTGATGAGGCTATGCCGGCCGACGTTTCAAGTGGACACAACTCCCCTCCGCTTCGATCCCTGCGATCTTCTCGCCGGAGAAGACCTTTTGGACGACCCTATCGCCGCCGCTCATCTTCCTGGTCTCCTCCTCGACAAGTCCAACCCATCAGTTAGCACCACCAGCGACTCTTCAGATCTCACTTATCGCACCAGATTACTCCTCCATAACCCTTCCGATGCCATGGGCCTCTCTGGCCTCCTCGTTCTCCCCCAATCATTCGGGGCAATATATTTGGGGGAGACTTTTTGCAGTTATATAAGTATTAACAACAGTTCTAATTTTGAAGTGAGAGACATCATTATTAAG…
>F01_transcript_102000
ATGAATGGTGTTACTGTTCTTGAACTAGATGAGTCTGAATTTGTTGAAGTTGATCCTACTGGGAGATATGGAAGGTATAATGAAATTCTTGGGAAAGGAGCATCAAAGACAGTTTATAGGGCTTTTGATGAGTATGAAGGGATTGAAGTGGCCTGGAATCAGGTAAAGCTTTACGATTTTCTACAAAGTCCAGAAGATCTTGAGAGGCTGTATTGTGAAATTCATCTGCTCAAGACTTTAAAGCACAGCAATATCATGAAGTTCTACACTTCTTGGGTTGATACTGCTAATAGGAATATTAACTTTGTGACAGAGATGTTCACCTCTGGTACTCTCAGACAGTAA
>F01_transcript_102002
ATGTTTGCAGTAATAAATGCATTCAAATGTGTTTGCTGGAGTCCGACAACATCCAAGGTCAAAATGGGACTGAAACGATCTTTTGCTGAGGATTTACTGGAATTGTCCTTTAAGCACCCAAAACAGCTCGACTCTAGTGAGCAGCTGACTTCACTTGCAGAAATTAGTCCTTCCTATAGAGCCTCTCAAAAAGCTGATATCCCAGCACCGGAGGTGTCCAAAGATGATATTAGTAATGTTGTCTCAGATTTTAATGATACTGAGTTTGAAACCAGTGCGCCCATTTCATGGGTGACCAGCAGTACTAGTGAGGAAGATACTGGATCTGAGGCAGTTATGTGCTCGTCTGATTTTCCAGAACACTTTGAATTCAACTTCGCTGGGAATATGTTAGTTCGG…
>F01_transcript_102003
ATGTTGCGAAGAGTAGCTAAATCGAGCTCAAGATCAAATATCCTCCGACAATTTTCTACTGCGATTCGCCGGAGTCATATAGACGACGAAGGAGATTGGAGTTACTCTTCTGAATGGTGGGATGACCAATTCCATGGCCGTCCTGTTTTCCGATCAACTTCTGACAAGGGAAATGGTGTCGTTTCTGTCTTAGCTTATCCTTCTTCAAGACCAGATAGAGTTTACTGGCCCGAAACAGAGAAGTGGCTTCAGCAAAGGTATTCAGAGATACATCCTGGTTGTCAACGGAATGGGACTTTCAGGATACTTGGTTATGAGTGGCGCTCTCTTCGATTCAATACAGAAACTCGCCAAAGCACGGTTAAAATAATGGCTGCTTGTAGGGAATCAGATCCTGGA…
>F01_transcript_102006
[truncated: 122,965 more rows]
