# Supplementary material for: A bZIP transcription factor, PqbZIP1, is involved in the plant defense response of American ginseng
Source: PeerJ. 2022 Mar 8;10:e12939. doi: 10.7717/peerj.12939 (PMC8916028; doi:10.7717/peerj.12939)
Supplement: Supplemental Information 12 [file peerj-10-12939-s012.xlsx]

## Sheet: Integrated_Function.anno.1
Table S8. Transcript function notes
#GeneID	COG_class	COG_class_annotation	GO_annotation	KEGG_annotation	KEGG_pathway	KOG_class	KOG_class_annotation	Pfam_annotation	Swissprot_annotation	eggNOG_class	eggNOG_class_annotation	nr_annotation
F01_transcript_41081	[EH]	--	Biological Process: folic acid-containing compound biosynthetic process (GO:0009396);; Cellular Component: chloroplast (GO:0009507);; Molecular Function: oxo-acid-lyase activity (GO:0016833);; Biological Process: chorismate metabolic process (GO:0046417);; Molecular Function: 4-amino-4-deoxychorismate synthase activity (GO:0046820);;	K13950|0|vvi:100258193|K13950 para-aminobenzoate synthetase [EC:2.6.1.85] | (RefSeq) aminodeoxychorismate synthase, chloroplastic	ko00790:Folate biosynthesis	[J]	Translation, ribosomal structure and biogenesis	chorismate binding enzyme;; Anthranilate synthase component I, N terminal region;; Glutamine amidotransferase class-I;; chorismate binding enzyme;; Glutamine amidotransferase class-I	Aminodeoxychorismate synthase, chloroplastic (Precursor) GN=ADCS OS=Solanum lycopersicum (Tomato) PE=2 SV=1	E	Amino acid transport and metabolism	PREDICTED: putative aminodeoxychorismate synthase [Prunus mume]
F01_transcript_39697	[G]	Carbohydrate transport and metabolism	Molecular Function: ATP binding (GO:0005524);; Biological Process: phosphorylation (GO:0016310);; Molecular Function: hydrolase activity (GO:0016787);; Biological Process: D-gluconate catabolic process (GO:0046177);; Molecular Function: gluconokinase activity (GO:0046316);;	--	--	[G]	Carbohydrate transport and metabolism	Shikimate kinase;; AAA domain;; AAA domain;; Thymidylate kinase	--	G	Carbohydrate transport and metabolism	PREDICTED: probable gluconokinase isoform X1 [Sesamum indicum]
F01_transcript_67433	--	--	--	K04523|4.04452e-111|vvi:100267604|K04523 ubiquilin | (RefSeq) ubiquitin domain-containing protein DSK2b	ko04141:Protein processing in endoplasmic reticulum	[OR]	--	Ubiquitin family	Ubiquitin domain-containing protein DSK2b GN=DSK2B OS=Arabidopsis thaliana (Mouse-ear cress) PE=1 SV=1	O	Posttranslational modification, protein turnover, chaperones	putative PDF1-interacting protein 1, partial [Gossypium barbadense]
F01_transcript_73359	[T]	Signal transduction mechanisms	Biological Process: activation of MAPKK activity (GO:0000186);; Molecular Function: MAP kinase kinase kinase activity (GO:0004709);; Molecular Function: ATP binding (GO:0005524);; Cellular Component: intracellular (GO:0005622);; Biological Process: integrin-mediated signaling pathway (GO:0007229);;	--	--	[T]	Signal transduction mechanisms	Protein tyrosine kinase;; Protein kinase domain	Serine/threonine-protein kinase HT1 GN=HT1 OS=Arabidopsis thaliana (Mouse-ear cress) PE=1 SV=1	T	Signal transduction mechanisms	PREDICTED: dual specificity protein kinase shkB [Vitis vinifera]
F01_transcript_128259	[E]	Amino acid transport and metabolism	Cellular Component: cytosol (GO:0005829);; Molecular Function: methionine gamma-lyase activity (GO:0018826);; Molecular Function: pyridoxal phosphate binding (GO:0030170);; Biological Process: protein homotetramerization (GO:0051289);;	K01761|2.01315e-100|tcc:TCM_015649|K01761 methionine-gamma-lyase [EC:4.4.1.11] | (RefSeq) Methionine gamma-lyase	ko00270:Cysteine and methionine metabolism;ko00450:Selenocompound metabolism	[E]	Amino acid transport and metabolism	Cys/Met metabolism PLP-dependent enzyme;; Cys/Met metabolism PLP-dependent enzyme;; Aminotransferase class I and II;; Aminotransferase class-V	Methionine gamma-lyase GN=MGL OS=Arabidopsis thaliana (Mouse-ear cress) PE=1 SV=1	E	Amino acid transport and metabolism	PREDICTED: methionine gamma-lyase [Sesamum indicum]
F01_transcript_101468	--	--	Molecular Function: transcriptional activator activity, RNA polymerase II core promoter proximal region sequence-specific binding (GO:0001077);; Cellular Component: nucleus (GO:0005634);; Molecular Function: sequence-specific DNA binding (GO:0043565);; Biological Process: positive regulation of transcription from RNA polymerase II promoter (GO:0045944);; Biological Process: defense response to ot…	--	--	[S]	Function unknown	CG-1 domain;; Ankyrin repeats (3 copies);; IQ calmodulin-binding motif;; Ankyrin repeats (many copies);; IPT/TIG domain;; Ankyrin repeat;; Ankyrin repeat	Calmodulin-binding transcription activator 3 GN=T26C19.4 OS=Arabidopsis thaliana (Mouse-ear cress) PE=1 SV=1	K	Transcription	PREDICTED: calmodulin-binding transcription activator 3 [Vitis vinifera]
F01_transcript_31279	--	--	--	--	--	[R]	General function prediction only	--	--	S	Function unknown	PREDICTED: uncharacterized protein LOC104104516 isoform X6 [Nicotiana tomentosiformis]
F01_transcript_62953	[G]	Carbohydrate transport and metabolism	Molecular Function: hydrolase activity (GO:0016787);;	K01188|9.22672e-115|fve:101296690|K01188 beta-glucosidase [EC:3.2.1.21] | (RefSeq) beta-glucosidase 24-like	ko00460:Cyanoamino acid metabolism;ko00500:Starch and sucrose metabolism;ko00940:Phenylpropanoid biosynthesis	[G]	Carbohydrate transport and metabolism	Glycosyl hydrolase family 1;; Glycosyl hydrolase family 1	Furostanol glycoside 26-O-beta-glucosidase {ECO:0000303|PubMed:8766714} (Precursor) OS=Cheilocostus speciosus (Crepe ginger) PE=1 SV=1	G	Carbohydrate transport and metabolism	PREDICTED: beta-glucosidase 24-like [Fragaria vesca subsp. vesca]
F01_transcript_100720	--	--	--	--	--	[R]	General function prediction only	Reverse transcriptase (RNA-dependent DNA polymerase)	RNA-directed DNA polymerase homolog OS=Oenothera berteroana (Bertero&apos;s evening primrose) PE=4 SV=1	L	Replication, recombination and repair	PREDICTED: uncharacterized protein LOC103829460 [Brassica rapa]
F01_transcript_46908	--	--	--	--	--	--	--	Plant family of unknown function (DUF810);; Plant family of unknown function (DUF810)	Squamosa promoter-binding-like protein 1 GN=F14M4.9/F14M4.10 OS=Arabidopsis thaliana (Mouse-ear cress) PE=1 SV=2	S	Function unknown	PREDICTED: uncharacterized protein LOC105164739 [Sesamum indicum]
F01_transcript_92494	[E]	Amino acid transport and metabolism	Molecular Function: metalloendopeptidase activity (GO:0004222);; Biological Process: proteolysis (GO:0006508);; Biological Process: peptide metabolic process (GO:0006518);; Cellular Component: integral component of membrane (GO:0016021);; Molecular Function: metal ion binding (GO:0046872);;	K01392|0|tcc:TCM_010744|K01392 thimet oligopeptidase [EC:3.4.24.15] | (RefSeq) Zincin-like metalloproteases family protein	--	[O]	Posttranslational modification, protein turnover, chaperones	Peptidase family M3	Probable thimet oligopeptidase GN=At1g67690 OS=Arabidopsis thaliana (Mouse-ear cress) PE=3 SV=1	E	Amino acid transport and metabolism	Zincin-like metalloproteases family protein [Theobroma cacao]
F01_transcript_107641	--	--	Cellular Component: integral component of membrane (GO:0016021);;	--	--	--	--	Protein of unknown function (DUF707);; Protein of unknown function (DUF707)	--	S	Function unknown	PREDICTED: uncharacterized protein LOC105172510 isoform X2 [Sesamum indicum]
F01_transcript_3667	[O]	Posttranslational modification, protein turnover, chaperones	Molecular Function: enzyme activator activity (GO:0008047);; Molecular Function: quinolinate synthetase A activity (GO:0008987);; Biological Process: aerobic respiration (GO:0009060);; Biological Process: NAD biosynthetic process (GO:0009435);; Cellular Component: chloroplast (GO:0009507);; Biological Process: quinolinate biosynthetic process (GO:0019805);; Molecular Function: protein homodimeriz…	K03517|0|vvi:100243361|K03517 quinolinate synthase [EC:2.5.1.72] | (RefSeq) quinolinate synthase, chloroplastic	ko00760:Nicotinate and nicotinamide metabolism	--	--	Quinolinate synthetase A protein;; Fe-S metabolism associated domain	Quinolinate synthase, chloroplastic (Precursor) GN=K6A12.7 OS=Arabidopsis thaliana (Mouse-ear cress) PE=1 SV=1	S	Function unknown	PREDICTED: quinolinate synthase, chloroplastic isoform X2 [Sesamum indicum]
F01_transcript_46450	--	--	Biological Process: protein folding (GO:0006457);; Molecular Function: unfolded protein binding (GO:0051082);;	--	--	[O]	Posttranslational modification, protein turnover, chaperones	--	--	O	Posttranslational modification, protein turnover, chaperones	DNAJ chaperone C-terminal domain-containing family protein [Populus trichocarpa]
F01_transcript_128014	[I]	Lipid transport and metabolism	Molecular Function: phospholipase D activity (GO:0004630);; Molecular Function: calcium ion binding (GO:0005509);; Cellular Component: membrane (GO:0016020);; Molecular Function: nucleotidyltransferase activity (GO:0016779);; Biological Process: phosphatidylcholine catabolic process (GO:0034638);; Molecular Function: N-acylphosphatidylethanolamine-specific phospholipase D activity (GO:0070290);;	K01115|0|pda:103708746|K01115 phospholipase D1/2 [EC:3.1.4.4] | (RefSeq) phospholipase D alpha 1	ko00564:Glycerophospholipid metabolism;ko00565:Ether lipid metabolism;ko04144:Endocytosis	[I]	Lipid transport and metabolism	C2 domain;; Phospholipase D C terminal;; Phospholipase D Active site motif;; PLD-like domain;; Phospholipase D Active site motif	Phospholipase D alpha 1 {ECO:0000250|UniProtKB:Q41142} OS=Carica papaya (Papaya) PE=1 SV=1	I	Lipid transport and metabolism	PREDICTED: phospholipase D alpha 1-like [Nelumbo nucifera]
F01_transcript_74030	[R]	General function prediction only	Cellular Component: nucleolus (GO:0005730);; Biological Process: rRNA processing (GO:0006364);; Biological Process: embryo sac development (GO:0009553);;	K14558|0|tcc:TCM_028352|K14558 periodic tryptophan protein 2 | (RefSeq) JHL25H03.15 protein isoform 1	ko03008:Ribosome biogenesis in eukaryotes	[A]	RNA processing and modification	WD domain, G-beta repeat;; Anaphase-promoting complex subunit 4 WD40 domain	Dynein assembly factor with WDR repeat domains 1 GN=DAW1 OS=Chlamydomonas reinhardtii (Chlamydomonas smithii) PE=1 SV=1	S	Function unknown	JHL25H03.15 protein isoform 5 [Theobroma cacao]
F01_transcript_125782	--	--	--	--	--	--	--	--	Disease resistance protein RGA2 GN=RGA2 OS=Solanum bulbocastanum (Wild potato) PE=1 SV=1	S	Function unknown	PREDICTED: putative disease resistance protein RGA3 [Vitis vinifera]
F01_transcript_82238	[D]	Cell cycle control, cell division, chromosome partitioning	Molecular Function: metal ion binding (GO:0046872);;	--	--	--	--	Zinc finger, C3HC4 type (RING finger);; Ankyrin repeats (3 copies);; Prokaryotic RING finger family 4;; Ankyrin repeats (many copies);; Ankyrin repeat	Putative E3 ubiquitin-protein ligase XBAT35 GN=XBAT35 OS=Arabidopsis thaliana (Mouse-ear cress) PE=2 SV=1	S	Function unknown	PREDICTED: putative E3 ubiquitin-protein ligase XBAT35 isoform X2 [Nicotiana sylvestris]
F01_transcript_141829	[G]	Carbohydrate transport and metabolism	Biological Process: ion transport (GO:0006811);; Cellular Component: integral component of membrane (GO:0016021);; Molecular Function: substrate-specific transmembrane transporter activity (GO:0022891);; Biological Process: single-organism transport (GO:0044765);; Biological Process: transmembrane transport (GO:0055085);; Biological Process: organic substance transport (GO:0071702);; Biological P…	--	--	[R]	General function prediction only	Sugar (and other) transporter;; Major Facilitator Superfamily	Organic cation/carnitine transporter 7 GN=MGH6.16 OS=Arabidopsis thaliana (Mouse-ear cress) PE=2 SV=1	G	Carbohydrate transport and metabolism	unnamed protein product [Coffea canephora]
F01_transcript_44111	[U]	Intracellular trafficking, secretion, and vesicular transport	Molecular Function: GTPase activity (GO:0003924);; Molecular Function: GTP binding (GO:0005525);; Biological Process: SRP-dependent cotranslational protein targeting to membrane (GO:0006614);; Molecular Function: 7S RNA binding (GO:0008312);; Cellular Component: chloroplast stroma (GO:0009570);; Cellular Component: signal recognition particle, chloroplast targeting (GO:0080085);;	K03106|0|tcc:TCM_022618|K03106 signal recognition particle subunit SRP54 [EC:3.6.5.4] | (RefSeq) Chloroplast signal recognition particle 54 kDa subunit	ko03060:Protein export	[U]	Intracellular trafficking, secretion, and vesicular transport	SRP54-type protein, GTPase domain;; Signal peptide binding domain;; SRP54-type protein, helical bundle domain;; Zeta toxin;; CobQ/CobB/MinD/ParA nucleotide binding domain;; Adenylylsulphate kinase;; CobW/HypB/UreG, nucleotide-binding domain	Signal recognition particle 54 kDa protein, chloroplastic (Precursor) GN=F8F6_150 OS=Arabidopsis thaliana (Mouse-ear cress) PE=1 SV=1	U	Intracellular trafficking, secretion, and vesicular transport	Chloroplast signal recognition particle 54 kDa subunit [Theobroma cacao]
F01_transcript_124130	--	--	--	--	--	--	--	--	--	--	--	PREDICTED: uncharacterized protein LOC104880632 [Vitis vinifera]
F01_transcript_18314	--	--	--	--	--	--	--	--	DAG protein, chloroplastic (Precursor) GN=DAG OS=Antirrhinum majus (Garden snapdragon) PE=2 SV=1	S	Function unknown	PREDICTED: uncharacterized protein At3g15000, mitochondrial [Nelumbo nucifera]
F01_transcript_99452	--	--	--	--	--	--	--	--	--	S	Function unknown	PREDICTED: uncharacterized protein LOC105174138 [Sesamum indicum]
F01_transcript_16673	--	--	Cellular Component: mitochondrion (GO:0005739);; Cellular Component: chloroplast inner membrane (GO:0009706);; Cellular Component: integral component of membrane (GO:0016021);;	--	--	--	--	Protein RETICULATA-related	--	S	Function unknown	PREDICTED: uncharacterized protein LOC105170900 [Sesamum indicum]
F01_transcript_93115	--	--	Cellular Component: nucleus (GO:0005634);; Biological Process: signal transduction (GO:0007165);; Molecular Function: zinc ion binding (GO:0008270);; Biological Process: positive regulation of flower development (GO:0009911);; Biological Process: vegetative to reproductive phase transition of meristem (GO:0010228);; Cellular Component: integral component of membrane (GO:0016021);; Biological Proc…	--	--	--	--	von Willebrand factor type A domain;; Cytosine specific DNA methyltransferase replication foci domain	Probable carboxylesterase 11 GN=CXE11 OS=Arabidopsis thaliana (Mouse-ear cress) PE=2 SV=1	S	Function unknown	PREDICTED: uncharacterized protein LOC102599284 isoform X1 [Solanum tuberosum]
F01_transcript_29247	--	--	--	K04508|9.54933e-24|fve:101304221|K04508 transducin (beta)-like 1 | (RefSeq) F-box-like/WD repeat-containing protein TBL1XR1	--	[B]	Chromatin structure and dynamics	--	--	S	Function unknown	PREDICTED: F-box-like/WD repeat-containing protein TBL1XR1-like [Fragaria vesca subsp. vesca]
F01_transcript_120410	[D]	Cell cycle control, cell division, chromosome partitioning	Molecular Function: inward rectifier potassium channel activity (GO:0005242);; Cellular Component: integral component of plasma membrane (GO:0005887);; Biological Process: response to water deprivation (GO:0009414);; Biological Process: response to salt stress (GO:0009651);; Biological Process: potassium ion import (GO:0010107);; Biological Process: regulation of membrane potential (GO:0042391);;…	--	--	[PT]	--	Ion transport protein;; Ion channel;; KHA, dimerisation domain of potassium ion channel;; Cyclic nucleotide-binding domain;; Ankyrin repeats (3 copies);; Ankyrin repeats (many copies);; Ankyrin repeats (many copies);; Ankyrin repeat;; Ankyrin repeat	Potassium channel AKT1 GN=AKT1 OS=Oryza sativa subsp. japonica (Rice) PE=2 SV=1	U	Intracellular trafficking, secretion, and vesicular transport	inwardly rectifying potassium channel subunit [Daucus carota]
F01_transcript_116047	--	--	Cellular Component: AP-5 adaptor complex (GO:0044599);;	K19025|3.91061e-149|pmum:103342520|K19025 AP-5 complex subunit zeta-1 | (RefSeq) AP-5 complex subunit zeta-1	--	--	--	AP-5 complex subunit, vesicle trafficking	--	S	Function unknown	PREDICTED: AP-5 complex subunit zeta-1 [Prunus mume]
F01_transcript_78888	--	--	Cellular Component: integral component of membrane (GO:0016021);;	--	--	[K]	Transcription	Mediator complex subunit 23	Mediator of RNA polymerase II transcription subunit 23 OS=Arabidopsis thaliana (Mouse-ear cress) PE=1 SV=1	K	Transcription	hypothetical protein L484_003995 [Morus notabilis]
F01_transcript_126970	--	--	--	K13989|8.0356e-10|pxb:103948154|K13989 Derlin-2/3 | (RefSeq) derlin-2.2	ko04141:Protein processing in endoplasmic reticulum	--	--	--	Derlin-2.1 GN=DER2.1 OS=Zea mays (Maize) PE=2 SV=2	S	Function unknown	PREDICTED: derlin-2.2 [Pyrus x bretschneideri]
F01_transcript_119036	--	--	--	--	--	[S]	Function unknown	Vitamin B6 photo-protection and homoeostasis	Protein root UVB sensitive 5 {ECO:0000303|PubMed:19515790} OS=Arabidopsis thaliana (Mouse-ear cress) PE=2 SV=1	S	Function unknown	PREDICTED: UPF0420 protein C16orf58 homolog isoform X3 [Cucumis melo]
F01_transcript_61851	--	--	--	K20296|0|vvi:100262446|K20296 vacuolar protein sorting-associated protein 51 | (RefSeq) vacuolar protein sorting-associated protein 51 homolog	--	[S]	Function unknown	Vps51/Vps67;; Exocyst complex component Sec5;; Dor1-like family;; COG (conserved oligomeric Golgi) complex component, COG2	--	S	Function unknown	PREDICTED: vacuolar protein sorting-associated protein 51 homolog [Vitis vinifera]
F01_transcript_107005	--	--	Cellular Component: membrane (GO:0016020);;	--	--	--	--	Protein of unknown function (DUF616)	--	S	Function unknown	unnamed protein product [Coffea canephora]
F01_transcript_102268	[T]	Signal transduction mechanisms	Biological Process: activation of MAPKK activity (GO:0000186);; Molecular Function: MAP kinase kinase kinase activity (GO:0004709);; Molecular Function: protein tyrosine kinase activity (GO:0004713);; Molecular Function: ATP binding (GO:0005524);; Cellular Component: intracellular (GO:0005622);; Biological Process: peptidyl-tyrosine phosphorylation (GO:0018108);;	K13436|0|cit:102619989|K13436 pto-interacting protein 1 [EC:2.7.11.1] | (RefSeq) PTI1-like tyrosine-protein kinase 3	ko04626:Plant-pathogen interaction	[T]	Signal transduction mechanisms	Protein tyrosine kinase;; Protein kinase domain	PTI1-like tyrosine-protein kinase 3 GN=PTI13 OS=Arabidopsis thaliana (Mouse-ear cress) PE=1 SV=1	T	Signal transduction mechanisms	hypothetical protein CICLE_v10020458mg [Citrus clementina]
F01_transcript_137865	[J]	Translation, ribosomal structure and biogenesis	Molecular Function: catalytic activity (GO:0003824);;	--	--	[J]	Translation, ribosomal structure and biogenesis	--	--	J	Translation, ribosomal structure and biogenesis	hypothetical protein CICLE_v10030921mg [Citrus clementina]
F01_transcript_134846	--	--	Biological Process: cytokinesis by cell plate formation (GO:0000911);; Molecular Function: double-stranded RNA binding (GO:0003725);; Molecular Function: protein binding (GO:0005515);; Biological Process: virus induced gene silencing (GO:0009616);; Biological Process: embryonic pattern specification (GO:0009880);; Biological Process: suspensor development (GO:0010098);; Biological Process: vegeta…	K11592|1.16861e-10|ath:AT1G01040|K11592 endoribonuclease Dicer [EC:3.1.26.-] | (RefSeq) DCL1; dicer-like 1	--	[A]	RNA processing and modification	--	Endoribonuclease Dicer homolog 1 GN=T25K16.4 OS=Arabidopsis thaliana (Mouse-ear cress) PE=1 SV=2	L	Replication, recombination and repair	endoribonuclease Dicer-like 1 [Arabidopsis thaliana]
F01_transcript_43626	[S]	Function unknown	Cellular Component: integral component of membrane (GO:0016021);; Biological Process: transmembrane transport (GO:0055085);;	--	--	[T]	Signal transduction mechanisms	OPT oligopeptide transporter protein;; OPT oligopeptide transporter protein;; OPT oligopeptide transporter protein	Oligopeptide transporter 7 GN=OPT7 OS=Arabidopsis thaliana (Mouse-ear cress) PE=2 SV=1	S	Function unknown	PREDICTED: oligopeptide transporter 7-like [Nicotiana tomentosiformis]
F01_transcript_37256	--	--	Cellular Component: thylakoid (GO:0009579);; Biological Process: plastid organization (GO:0009657);; Molecular Function: alternative oxidase activity (GO:0009916);; Cellular Component: integral component of membrane (GO:0016021);; Biological Process: carotenoid biosynthetic process (GO:0016117);; Molecular Function: metal ion binding (GO:0046872);; Biological Process: oxidation-reduction process …	K17893|1.34464e-69|pop:POPTR_0011s00890g|K17893 ubiquinol oxidase [EC:1.10.3.11] | (RefSeq) POPTRDRAFT_1093171; hypothetical protein	--	--	--	--	Ubiquinol oxidase 4, chloroplastic/chromoplastic (Precursor) GN=T10I14_90 OS=Arabidopsis thaliana (Mouse-ear cress) PE=1 SV=2	S	Function unknown	plastid terminal oxidase [Daucus carota]
F01_transcript_87439	--	--	Molecular Function: GTPase activator activity (GO:0005096);; Cellular Component: intracellular (GO:0005622);; Biological Process: intracellular protein transport (GO:0006886);; Cellular Component: endomembrane system (GO:0012505);; Molecular Function: Rab GTPase binding (GO:0017137);; Biological Process: regulation of vesicle fusion (GO:0031338);; Biological Process: activation of GTPase activity…	--	--	[U]	Intracellular trafficking, secretion, and vesicular transport	Rab-GTPase-TBC domain	--	S	Function unknown	hypothetical protein PRUPE_ppa001448mg [Prunus persica]
F01_transcript_109955	--	--	Molecular Function: binding (GO:0005488);; Biological Process: regulation of transcription, DNA-templated (GO:0006355);; Cellular Component: intracellular membrane-bounded organelle (GO:0043231);;	--	--	--	--	B3 DNA binding domain;; CW-type Zinc Finger	B3 domain-containing transcription repressor VAL1 GN=T6B20.17 OS=Arabidopsis thaliana (Mouse-ear cress) PE=1 SV=1	K	Transcription	PREDICTED: B3 domain-containing transcription repressor VAL1-like [Nicotiana sylvestris]
F01_transcript_102737	[TK]	--	Cellular Component: intracellular (GO:0005622);; Biological Process: regulation of cellular process (GO:0050794);;	K12129|0|vvi:100246836|K12129 pseudo-response regulator 7 | (RefSeq) two-component response regulator-like PRR37	ko04712:Circadian rhythm - plant	[K]	Transcription	Response regulator receiver domain;; CCT motif	Two-component response regulator-like PRR73 GN=PRR73 OS=Oryza sativa subsp. japonica (Rice) PE=2 SV=1	K	Transcription	PREDICTED: two-component response regulator-like PRR37 [Vitis vinifera]
F01_transcript_113987	--	--	Molecular Function: DNA binding (GO:0003677);; Molecular Function: transcription factor activity, sequence-specific DNA binding (GO:0003700);; Cellular Component: nucleus (GO:0005634);; Biological Process: regulation of transcription, DNA-templated (GO:0006355);; Molecular Function: 2-alkenal reductase [NAD(P)] activity (GO:0032440);; Molecular Function: protein dimerization activity (GO:0046983)…	K09264|2.1229e-105|pmum:103319429|K09264 MADS-box transcription factor, plant | (RefSeq) MADS-box transcription factor 23	--	[K]	Transcription	SRF-type transcription factor (DNA-binding and dimerisation domain);; K-box region	MADS-box transcription factor 27 GN=B1267B06.20 OS=Oryza sativa subsp. japonica (Rice) PE=2 SV=2	K	Transcription	PREDICTED: MADS-box transcription factor 23-like isoform X3 [Eucalyptus grandis]
F01_transcript_139808	--	--	--	--	--	--	--	--	--	S	Function unknown	PREDICTED: uncharacterized protein LOC103985960 [Musa acuminata subsp. malaccensis]
F01_transcript_40134	[G]	Carbohydrate transport and metabolism	Molecular Function: beta-galactosidase activity (GO:0004565);; Biological Process: carbohydrate metabolic process (GO:0005975);; Cellular Component: beta-galactosidase complex (GO:0009341);; Molecular Function: carbohydrate binding (GO:0030246);; Cellular Component: intracellular membrane-bounded organelle (GO:0043231);;	K01190|1.78297e-136|vvi:100241220|K01190 beta-galactosidase [EC:3.2.1.23] | (RefSeq) beta-galactosidase	ko00052:Galactose metabolism;ko00511:Other glycan degradation;ko00600:Sphingolipid metabolism	--	--	Beta galactosidase small chain;; Glycosyl hydrolases family 2, TIM barrel domain	--	G	Carbohydrate transport and metabolism	PREDICTED: beta-galactosidase [Vitis vinifera]
F01_transcript_110601	--	--	Molecular Function: mannosyl-oligosaccharide 1,2-alpha-mannosidase activity (GO:0004571);; Molecular Function: calcium ion binding (GO:0005509);; Cellular Component: endoplasmic reticulum (GO:0005783);; Biological Process: N-glycan processing (GO:0006491);; Cellular Component: membrane (GO:0016020);; Biological Process: ubiquitin-dependent ERAD pathway (GO:0030433);; Biological Process: endoplasm…	K10085|0|tcc:TCM_020768|K10085 ER degradation enhancer, mannosidase alpha-like 2 | (RefSeq) Glycosyl hydrolase family 47 protein isoform 1	ko04141:Protein processing in endoplasmic reticulum	[G]	Carbohydrate transport and metabolism	Glycosyl hydrolase family 47	Probable alpha-mannosidase I MNS4 GN=MNS4 OS=Arabidopsis thaliana (Mouse-ear cress) PE=2 SV=1	O	Posttranslational modification, protein turnover, chaperones	Glycosyl hydrolase family 47 protein isoform 1 [Theobroma cacao]
F01_transcript_77117	[T]	Signal transduction mechanisms	Cellular Component: integral component of membrane (GO:0016021);; Molecular Function: hydrolase activity (GO:0016787);;	--	--	--	--	Calcineurin-like phosphoesterase	--	S	Function unknown	hypothetical protein MIMGU_mgv1a000678mg [Erythranthe guttata]
F01_transcript_50294	[GI]	--	Cellular Component: membrane (GO:0016020);; Molecular Function: pectinesterase activity (GO:0030599);; Molecular Function: pectinesterase inhibitor activity (GO:0046910);; Biological Process: cell wall organization (GO:0071555);; Cellular Component: cell periphery (GO:0071944);;	K01051|9.89825e-106|sly:101260197|K01051 pectinesterase [EC:3.1.1.11] | (RefSeq) pectinesterase-like	ko00040:Pentose and glucuronate interconversions;ko00500:Starch and sucrose metabolism	--	--	Pectinesterase;; Plant invertase/pectin methylesterase inhibitor	Pectinesterase (Precursor) OS=Ficus pumila var. awkeotsang (Jelly fig) PE=1 SV=1	G	Carbohydrate transport and metabolism	unnamed protein product [Coffea canephora]
F01_transcript_87961	--	--	--	--	--	--	--	Protein of unknown function (DUF668);; Domain of unknown function (DUF3475)	--	S	Function unknown	PREDICTED: uncharacterized protein LOC105166052 [Sesamum indicum]
F01_transcript_59191	--	--	--	--	--	--	--	--	--	S	Function unknown	hypothetical protein MIMGU_mgv11b021844mg [Erythranthe guttata]
F01_transcript_123659	[R]	General function prediction only	Cellular Component: integral component of membrane (GO:0016021);;	--	--	[Z]	Cytoskeleton	Tetratricopeptide repeat;; Tetratricopeptide repeat;; Tetratricopeptide repeat;; Tetratricopeptide repeat;; Tetratricopeptide repeat;; Tetratricopeptide repeat	--	S	Function unknown	PREDICTED: uncharacterized protein LOC104238333 [Nicotiana sylvestris]
F01_transcript_64794	--	--	Biological Process: cell plate assembly (GO:0000919);; Cellular Component: trans-Golgi network (GO:0005802);; Cellular Component: cytosol (GO:0005829);; Biological Process: intra-Golgi vesicle-mediated transport (GO:0006891);; Cellular Component: integral component of membrane (GO:0016021);; Biological Process: early endosome to Golgi transport (GO:0034498);; Cellular Component: TRAPPII protein c…	K20307|0|vvi:100253761|K20307 trafficking protein particle complex subunit 10 | (RefSeq) trafficking protein particle complex II-specific subunit 130 homolog	--	[R]	General function prediction only	Trafficking protein particle complex subunit 10, TRAPPC10	Trafficking protein particle complex II-specific subunit 130 homolog {ECO:0000305} OS=Arabidopsis thaliana (Mouse-ear cress) PE=1 SV=1	S	Function unknown	PREDICTED: uncharacterized protein LOC100253761 [Vitis vinifera]
F01_transcript_54214	--	--	--	--	--	--	--	--	--	S	Function unknown	PREDICTED: uncharacterized protein LOC105173526 [Sesamum indicum]
F01_transcript_64557	[J]	Translation, ribosomal structure and biogenesis	Molecular Function: nuclease activity (GO:0004518);;	K01166|1.15472e-29|smo:SELMODRAFT_87215|K01166 ribonuclease T2 [EC:3.1.27.1] | (RefSeq) hypothetical protein	--	[A]	RNA processing and modification	Ribonuclease T2 family	Ribonuclease-like storage protein (Precursor) OS=Panax ginseng (Korean ginseng) PE=1 SV=2	S	Function unknown	RecName: Full=Ribonuclease-like storage protein; AltName: Full=Root 28 kDa major protein; Flags: Precursor [Panax ginseng]
F01_transcript_81519	--	--	Cellular Component: microtubule (GO:0005874);;	--	--	--	--	Domain of unknown function (DUF4228);; 14-3-3 protein	DNA replication licensing factor MCM4 GN=MCM4 OS=Arabidopsis thaliana (Mouse-ear cress) PE=1 SV=1	S	Function unknown	PREDICTED: uncharacterized protein LOC103404295 [Malus domestica]
F01_transcript_145447	[R]	General function prediction only	Biological Process: regulation of transcription, DNA-templated (GO:0006355);;	--	--	[R]	General function prediction only	WD domain, G-beta repeat	Topless-related protein 4 GN=MSJ11.27 OS=Arabidopsis thaliana (Mouse-ear cress) PE=1 SV=2	S	Function unknown	PREDICTED: protein TOPLESS-like [Elaeis guineensis]
F01_transcript_25156	--	--	Cellular Component: cytoplasm (GO:0005737);; Cellular Component: plasma membrane (GO:0005886);; Cellular Component: plasmodesma (GO:0009506);; Biological Process: metal ion transport (GO:0030001);; Molecular Function: transition metal ion binding (GO:0046914);; Biological Process: cellular transition metal ion homeostasis (GO:0046916);;	--	--	[P]	Inorganic ion transport and metabolism	Heavy-metal-associated domain	Heavy metal-associated isoprenylated plant protein 26 (Precursor) GN=F20M13.140 OS=Arabidopsis thaliana (Mouse-ear cress) PE=1 SV=1	S	Function unknown	hypothetical protein MIMGU_mgv1a015538mg [Erythranthe guttata]
F01_transcript_63343	--	--	Molecular Function: acid phosphatase activity (GO:0003993);; Biological Process: dephosphorylation (GO:0016311);; Molecular Function: metal ion binding (GO:0046872);;	--	--	[G]	Carbohydrate transport and metabolism	--	Purple acid phosphatase (Precursor) OS=Glycine max (Soybean) PE=1 SV=2	S	Function unknown	purple acid phosphatase [Medicago truncatula]
F01_transcript_124463	[J]	Translation, ribosomal structure and biogenesis	Molecular Function: nucleotide binding (GO:0000166);; Molecular Function: nucleic acid binding (GO:0003676);;	K11294|4.23823e-94|vvi:100262769|K11294 nucleolin | (RefSeq) nucleolin 2	--	[K]	Transcription	RNA recognition motif. (a.k.a. RRM, RBD, or RNP domain)	Nucleolin 2 GN=OSJNBa0058K23.21 OS=Oryza sativa subsp. japonica (Rice) PE=2 SV=2	S	Function unknown	PREDICTED: nucleolin 2 isoform X2 [Vitis vinifera]
F01_transcript_78856	--	--	Cellular Component: mitochondrial inner membrane presequence translocase complex (GO:0005744);; Biological Process: protein import into mitochondrial matrix (GO:0030150);;	K17805|2.17936e-53|vvi:100261824|K17805 mitochondrial import inner membrane translocase subunit TIM16 | (RefSeq) mitochondrial import inner membrane translocase subunit PAM16 like 2	--	[S]	Function unknown	Pam16	--	U	Intracellular trafficking, secretion, and vesicular transport	PREDICTED: mitochondrial import inner membrane translocase subunit Tim16 isoform X1 [Vitis vinifera]
F01_transcript_123676	--	--	--	--	--	--	--	--	--	S	Function unknown	PREDICTED: uncharacterized protein LOC100251901 isoform X1 [Vitis vinifera]
F01_transcript_34394	[E]	Amino acid transport and metabolism	Biological Process: arginine catabolic process (GO:0006527);; Biological Process: spermidine biosynthetic process (GO:0008295);; Molecular Function: arginine decarboxylase activity (GO:0008792);;	K01583|9.42146e-56|pmum:103335592|K01583 arginine decarboxylase [EC:4.1.1.19] | (RefSeq) arginine decarboxylase	ko00330:Arginine and proline metabolism	[E]	Amino acid transport and metabolism	--	Glutamine synthetase, chloroplastic (Precursor) GN=GLN2 OS=Daucus carota (Wild carrot) PE=2 SV=1	E	Amino acid transport and metabolism	unnamed protein product [Coffea canephora]
F01_transcript_8114	[H]	Coenzyme transport and metabolism	Cellular Component: endosome (GO:0005768);; Cellular Component: vacuolar membrane (GO:0005774);; Cellular Component: trans-Golgi network (GO:0005802);; Molecular Function: S-adenosylmethionine-dependent methyltransferase activity (GO:0008757);; Cellular Component: integral component of membrane (GO:0016021);; Biological Process: methylation (GO:0032259);;	--	--	--	--	Putative S-adenosyl-L-methionine-dependent methyltransferase;; Methyltransferase domain;; Methyltransferase domain	Probable methyltransferase PMT21 GN=ERD3 OS=Arabidopsis thaliana (Mouse-ear cress) PE=2 SV=1	S	Function unknown	hypothetical protein MIMGU_mgv1a003222mg [Erythranthe guttata]
F01_transcript_55306	--	--	Biological Process: proteasome-mediated ubiquitin-dependent protein catabolic process (GO:0043161);; Molecular Function: metal ion binding (GO:0046872);; Molecular Function: ubiquitin protein ligase activity (GO:0061630);;	K16271|1.06899e-111|vvi:100263653|K16271 E3 ubiquitin-protein ligase RLIM [EC:2.3.2.27] | (RefSeq) E3 ubiquitin-protein ligase RLIM	--	[O]	Posttranslational modification, protein turnover, chaperones	Ring finger domain;; RING-H2 zinc finger domain;; RING-like zinc finger;; Zinc finger, C3HC4 type (RING finger);; Zinc finger, C3HC4 type (RING finger)	Receptor homology region, transmembrane domain- and RING domain-containing protein 4 (Precursor) GN=RMR4 OS=Arabidopsis thaliana (Mouse-ear cress) PE=2 SV=1	O	Posttranslational modification, protein turnover, chaperones	hypothetical protein VITISV_024970 [Vitis vinifera]
F01_transcript_52893	[KT]	--	Cellular Component: GARP complex (GO:0000938);; Cellular Component: cytosol (GO:0005829);; Cellular Component: integral component of membrane (GO:0016021);; Biological Process: retrograde transport, endosome to Golgi (GO:0042147);;	K20299|3.14116e-50|pda:103709815|K20299 vacuolar protein sorting-associated protein 53 | (RefSeq) vacuolar protein sorting-associated protein 53 A	--	[U]	Intracellular trafficking, secretion, and vesicular transport	Vps53-like, N-terminal;; Got1/Sft2-like family	Vacuolar protein sorting-associated protein 53 A OS=Arabidopsis thaliana (Mouse-ear cress) PE=1 SV=1	U	Intracellular trafficking, secretion, and vesicular transport	PREDICTED: vacuolar protein sorting-associated protein 53 A [Elaeis guineensis]
F01_transcript_66800	--	--	Molecular Function: ferrochelatase activity (GO:0004325);; Molecular Function: protein serine/threonine kinase activity (GO:0004674);; Molecular Function: protein serine/threonine/tyrosine kinase activity (GO:0004712);; Molecular Function: protein binding (GO:0005515);; Molecular Function: ATP binding (GO:0005524);; Cellular Component: nucleus (GO:0005634);; Biological Process: mRNA processing (G…	--	--	[T]	Signal transduction mechanisms	--	Serine/threonine-protein kinase AFC2 GN=AFC2 OS=Arabidopsis thaliana (Mouse-ear cress) PE=1 SV=1	T	Signal transduction mechanisms	PREDICTED: serine/threonine-protein kinase AFC2 isoform X1 [Tarenaya hassleriana]
F01_transcript_64279	--	--	--	--	--	[R]	General function prediction only	PPR repeat family;; PPR repeat;; PPR repeat;; Pentatricopeptide repeat domain;; Pentacotripeptide-repeat region of PRORP	Pentatricopeptide repeat-containing protein At2g15980 GN=At2g15980 OS=Arabidopsis thaliana (Mouse-ear cress) PE=2 SV=1	S	Function unknown	PREDICTED: pentatricopeptide repeat-containing protein At2g15980-like isoform X1 [Solanum tuberosum]
F01_transcript_22616	--	--	Molecular Function: translation initiation factor activity (GO:0003743);; Biological Process: translational initiation (GO:0006413);;	K03262|2.1778e-103|vvi:100262554|K03262 translation initiation factor 5 | (RefSeq) eukaryotic translation initiation factor 5	ko03013:RNA transport	[J]	Translation, ribosomal structure and biogenesis	eIF4-gamma/eIF5/eIF2-epsilon	Probable eukaryotic translation initiation factor 5-2 GN=At1g77840 OS=Arabidopsis thaliana (Mouse-ear cress) PE=2 SV=1	J	Translation, ribosomal structure and biogenesis	eukaryotic translation initiation factor [Hevea brasiliensis]
F01_transcript_127662	--	--	Cellular Component: mitochondrial outer membrane translocase complex (GO:0005742);; Molecular Function: protein channel activity (GO:0015266);; Biological Process: protein import into mitochondrial matrix (GO:0030150);;	K11518|7.92406e-147|sly:101262530|K11518 mitochondrial import receptor subunit TOM40 | (RefSeq) mitochondrial import receptor subunit TOM40-1	--	[U]	Intracellular trafficking, secretion, and vesicular transport	Eukaryotic porin;; Eukaryotic porin;; Eukaryotic porin	Mitochondrial import receptor subunit TOM40-1, N-terminally processed GN=TOM40-1 OS=Arabidopsis thaliana (Mouse-ear cress) PE=1 SV=3	O	Posttranslational modification, protein turnover, chaperones	PREDICTED: mitochondrial import receptor subunit TOM40-1 [Solanum lycopersicum]
F01_transcript_65726	--	--	Biological Process: cell fate specification (GO:0001708);; Cellular Component: Golgi apparatus (GO:0005794);; Biological Process: anthocyanin-containing compound biosynthetic process (GO:0009718);; Biological Process: vesicle-mediated transport (GO:0016192);; Cellular Component: extrinsic component of membrane (GO:0019898);; Biological Process: positive regulation of vacuole organization (GO:0044…	K19513|1.52425e-106|cit:102610159|K19513 protein CLEC16A | (RefSeq) uncharacterized LOC102610159	--	[S]	Function unknown	--	--	S	Function unknown	hypothetical protein CICLE_v10007425mg [Citrus clementina]
F01_transcript_7053	[K]	Transcription	Molecular Function: protein kinase activity (GO:0004672);; Molecular Function: ATP binding (GO:0005524);; Cellular Component: plasma membrane (GO:0005886);; Biological Process: protein phosphorylation (GO:0006468);; Cellular Component: chloroplast (GO:0009507);; Cellular Component: integral component of membrane (GO:0016021);;	--	--	--	--	Protein tyrosine kinase;; Protein kinase domain;; Leucine Rich Repeat	Probable inactive receptor kinase At1g27190 (Precursor) GN=At1g27190 OS=Arabidopsis thaliana (Mouse-ear cress) PE=1 SV=1	T	Signal transduction mechanisms	PREDICTED: probable inactive receptor kinase At1g27190 [Nicotiana tomentosiformis]
F01_transcript_131315	--	--	Cellular Component: integral component of membrane (GO:0016021);;	--	--	--	--	--	--	S	Function unknown	hypothetical protein PRUPE_ppa015613mg, partial [Prunus persica]
F01_transcript_41455	--	--	--	--	--	--	--	--	--	--	--	PREDICTED: protein FAR1-RELATED SEQUENCE 5-like [Fragaria vesca subsp. vesca]
F01_transcript_36555	[R]	General function prediction only	Molecular Function: GTP binding (GO:0005525);; Biological Process: small GTPase mediated signal transduction (GO:0007264);; Cellular Component: plastid (GO:0009536);; Cellular Component: integral component of membrane (GO:0016021);;	K07937|3.50941e-126|vvi:100242677|K07937 ADP-ribosylation factor 1 | (RefSeq) ADP-ribosylation factor	ko04144:Endocytosis	[U]	Intracellular trafficking, secretion, and vesicular transport	ADP-ribosylation factor family;; Ras of Complex, Roc, domain of DAPkinase;; Signal recognition particle receptor beta subunit;; Ras family;; Gtr1/RagA G protein conserved region;; 50S ribosome-binding GTPase	ADP-ribosylation factor 2 GN=OJ1119_H02.17 OS=Oryza sativa subsp. japonica (Rice) PE=2 SV=2	S	Function unknown	hypothetical protein POPTR_0002s19210g [Populus trichocarpa]
F01_transcript_94096	--	--	Molecular Function: transferase activity, transferring glycosyl groups (GO:0016757);;	--	--	[GC]	--	UDP-glucoronosyl and UDP-glucosyl transferase	Anthocyanidin 3-O-glucoside 2&apos;&apos;-O-glucosyltransferase GN=3GGT OS=Ipomoea nil (Japanese morning glory) PE=1 SV=1	S	Function unknown	PREDICTED: UDP-glycosyltransferase 79B3-like [Cicer arietinum]
F01_transcript_38265	--	--	--	--	--	--	--	--	--	S	Function unknown	unnamed protein product [Coffea canephora]
F01_transcript_85980	--	--	Molecular Function: nucleotide binding (GO:0000166);; Molecular Function: nucleic acid binding (GO:0003676);;	K12893|1.72161e-95|sot:102590704|K12893 splicing factor, arginine/serine-rich 4/5/6 | (RefSeq) serine/arginine-rich splicing factor RS31-like	ko03040:Spliceosome	[A]	RNA processing and modification	RNA recognition motif. (a.k.a. RRM, RBD, or RNP domain);; RNA recognition motif. (a.k.a. RRM, RBD, or RNP domain)	Serine/arginine-rich splicing factor RS31 GN=F21F14.30 OS=Arabidopsis thaliana (Mouse-ear cress) PE=1 SV=2	S	Function unknown	hypothetical protein MIMGU_mgv1a012753mg [Erythranthe guttata]
F01_transcript_91401	[R]	General function prediction only	Biological Process: dephosphorylation (GO:0016311);; Molecular Function: phosphatase activity (GO:0016791);;	K01094|3.11052e-128|cit:102624238|K01094 phosphatidylglycerophosphatase GEP4 [EC:3.1.3.27] | (RefSeq) uncharacterized LOC102624238	ko00564:Glycerophospholipid metabolism	[R]	General function prediction only	Mitochondrial PGP phosphatase;; HAD-hyrolase-like	--	S	Function unknown	unnamed protein product [Coffea canephora]
F01_transcript_125112	--	--	Molecular Function: RNA polymerase II transcription cofactor activity (GO:0001104);; Biological Process: regulation of transcription from RNA polymerase II promoter (GO:0006357);; Cellular Component: mediator complex (GO:0016592);; Cellular Component: core mediator complex (GO:0070847);;	K15151|2.82422e-80|vvi:100263293|K15151 mediator of RNA polymerase II transcription subunit 10 | (RefSeq) mediator of RNA polymerase II transcription subunit 10b	--	[K]	Transcription	Transcription factor subunit Med10 of Mediator complex	Mediator of RNA polymerase II transcription subunit 10b GN=T24P13.4 OS=Arabidopsis thaliana (Mouse-ear cress) PE=1 SV=1	K	Transcription	PREDICTED: mediator of RNA polymerase II transcription subunit 10b [Vitis vinifera]
F01_transcript_70489	[D]	Cell cycle control, cell division, chromosome partitioning	Cellular Component: chromatin (GO:0000785);; Molecular Function: chromatin binding (GO:0003682);; Molecular Function: ATP binding (GO:0005524);; Cellular Component: cytoplasm (GO:0005737);; Cellular Component: spindle (GO:0005819);; Biological Process: DNA repair (GO:0006281);; Biological Process: mitotic sister chromatid cohesion (GO:0007064);; Cellular Component: plasmodesma (GO:0009506);; Cell…	K06669|1.17869e-64|dosa:Os02t0133300-01|K06669 structural maintenance of chromosome 3 (chondroitin sulfate proteoglycan 6) | (RAP-DB) Os02g0133300; Similar to SMC3 protein.	--	[D]	Cell cycle control, cell division, chromosome partitioning	RecF/RecN/SMC N terminal domain;; AAA domain, putative AbiEii toxin, Type IV TA system	Structural maintenance of chromosomes protein 3 GN=T22O13.6 OS=Arabidopsis thaliana (Mouse-ear cress) PE=2 SV=1	D	Cell cycle control, cell division, chromosome partitioning	unknown [Populus trichocarpa]
F01_transcript_25869	--	--	Cellular Component: Golgi apparatus (GO:0005794);; Biological Process: carbohydrate transport (GO:0008643);; Cellular Component: integral component of membrane (GO:0016021);;	--	--	--	--	Protein of unknown function (DUF1195)	--	S	Function unknown	PREDICTED: uncharacterized protein LOC104595729 [Nelumbo nucifera]
F01_transcript_64098	--	--	--	--	--	[O]	Posttranslational modification, protein turnover, chaperones	DnaJ domain	--	O	Posttranslational modification, protein turnover, chaperones	PREDICTED: uncharacterized protein LOC104586235 isoform X1 [Nelumbo nucifera]
F01_transcript_20862	[H]	Coenzyme transport and metabolism	Cellular Component: nucleus (GO:0005634);; Cellular Component: cytosol (GO:0005829);; Biological Process: regulation of mitotic cell cycle (GO:0007346);; Biological Process: protein sumoylation (GO:0016925);; Molecular Function: SUMO activating enzyme activity (GO:0019948);;	K10684|9.86744e-143|vvi:100268076|K10684 ubiquitin-like 1-activating enzyme E1 A [EC:6.2.1.45] | (RefSeq) SUMO-activating enzyme subunit 1B-1	ko04120:Ubiquitin mediated proteolysis	[O]	Posttranslational modification, protein turnover, chaperones	ThiF family	SUMO-activating enzyme subunit 1A GN=F13M23.80 OS=Arabidopsis thaliana (Mouse-ear cress) PE=1 SV=1	H	Coenzyme transport and metabolism	PREDICTED: SUMO-activating enzyme subunit 1B-1 isoform X2 [Vitis vinifera]
F01_transcript_37241	[I]	Lipid transport and metabolism	Biological Process: phosphorus metabolic process (GO:0006793);; Biological Process: isoprenoid biosynthetic process (GO:0008299);; Molecular Function: transferase activity, transferring acyl groups (GO:0016746);; Cellular Component: intracellular part (GO:0044424);;	K01641|5.08465e-94|smo:SELMODRAFT_179152|K01641 hydroxymethylglutaryl-CoA synthase [EC:2.3.3.10] | (RefSeq) hypothetical protein	ko00072:Synthesis and degradation of ketone bodies;ko00280:Valine, leucine and isoleucine degradation;ko00650:Butanoate metabolism;ko00900:Terpenoid backbone biosynthesis	[I]	Lipid transport and metabolism	Hydroxymethylglutaryl-coenzyme A synthase C terminal;; Hydroxymethylglutaryl-coenzyme A synthase N terminal	Hydroxymethylglutaryl-CoA synthase GN=T26M18.30 OS=Arabidopsis thaliana (Mouse-ear cress) PE=1 SV=2	I	Lipid transport and metabolism	hypothetical protein [Cryptococcus neoformans var. neoformans JEC21]
F01_transcript_33923	--	--	Cellular Component: Golgi apparatus (GO:0005794);; Cellular Component: integral component of membrane (GO:0016021);; Molecular Function: O-acetyltransferase activity (GO:0016413);; Biological Process: cell wall organization or biogenesis (GO:0071554);;	--	--	--	--	--	Protein trichome birefringence-like 5 GN=TBL5 OS=Arabidopsis thaliana (Mouse-ear cress) PE=2 SV=1	S	Function unknown	hypothetical protein POPTR_0006s07090g [Populus trichocarpa]
F01_transcript_11404	--	--	--	--	--	--	--	Protein of unknown function (DUF1005)	--	S	Function unknown	PREDICTED: uncharacterized protein LOC101246921 [Solanum lycopersicum]
F01_transcript_63432	--	--	--	--	--	--	--	Spindle and kinetochore-associated protein 2	--	S	Function unknown	PREDICTED: uncharacterized protein LOC102587954 [Solanum tuberosum]
F01_transcript_144585	[R]	General function prediction only	Cellular Component: membrane (GO:0016020);; Molecular Function: oxidoreductase activity (GO:0016491);;	K14003|2.53523e-153|sly:101251489|K14003 prolactin regulatory element-binding protein | (RefSeq) SEC12-like protein 2	ko04141:Protein processing in endoplasmic reticulum	[U]	Intracellular trafficking, secretion, and vesicular transport	WD domain, G-beta repeat;; Anaphase-promoting complex subunit 4 WD40 domain	SEC12-like protein 2 GN=F2I9.9 OS=Arabidopsis thaliana (Mouse-ear cress) PE=1 SV=4	S	Function unknown	PREDICTED: SEC12-like protein 2 [Solanum lycopersicum]
F01_transcript_134282	[H]	Coenzyme transport and metabolism	Molecular Function: 2-amino-4-hydroxy-6-hydroxymethyldihydropteridine diphosphokinase activity (GO:0003848);; Molecular Function: dihydropteroate synthase activity (GO:0004156);; Biological Process: folic acid-containing compound biosynthetic process (GO:0009396);; Molecular Function: kinase activity (GO:0016301);; Biological Process: phosphorylation (GO:0016310);;	K13941|0|cic:CICLE_v10031260mg|K13941 2-amino-4-hydroxy-6-hydroxymethyldihydropteridine diphosphokinase / dihydropteroate synthase [EC:2.7.6.3 2.5.1.15] | (RefSeq) hypothetical protein	ko00790:Folate biosynthesis	[H]	Coenzyme transport and metabolism	Pterin binding enzyme;; 7,8-dihydro-6-hydroxymethylpterin-pyrophosphokinase (HPPK)	--	H	Coenzyme transport and metabolism	hypothetical protein CICLE_v10031260mg [Citrus clementina]
F01_transcript_49752	--	--	Molecular Function: nucleotide binding (GO:0000166);; Molecular Function: nucleic acid binding (GO:0003676);;	K12881|9.07949e-28|vvi:100257081|K12881 THO complex subunit 4 | (RefSeq) THO complex subunit 4A	ko03013:RNA transport;ko03015:mRNA surveillance pathway;ko03040:Spliceosome	[A]	RNA processing and modification	--	THO complex subunit 4A GN=MMN10.26 OS=Arabidopsis thaliana (Mouse-ear cress) PE=1 SV=1	S	Function unknown	PREDICTED: THO complex subunit 4A-like isoform X1 [Nelumbo nucifera]
F01_transcript_52114	[R]	General function prediction only	Molecular Function: kinase activity (GO:0016301);; Biological Process: phosphorylation (GO:0016310);;	K13137|0|pop:POPTR_0001s17450g|K13137 serine-threonine kinase receptor-associated protein | (RefSeq) POPTRDRAFT_829514; transducin family protein	ko03013:RNA transport	[I]	Lipid transport and metabolism	WD domain, G-beta repeat;; Anaphase-promoting complex subunit 4 WD40 domain	Eukaryotic translation initiation factor 3 subunit I {ECO:0000255|HAMAP-Rule:MF_03008} GN=TIF3I1 OS=Arabidopsis thaliana (Mouse-ear cress) PE=2 SV=2	S	Function unknown	transducin family protein [Populus trichocarpa]
F01_transcript_56556	[C]	Energy production and conversion	Biological Process: nitric oxide biosynthetic process (GO:0006809);; Molecular Function: nitrate reductase (NADH) activity (GO:0009703);; Molecular Function: heme binding (GO:0020037);; Molecular Function: molybdenum ion binding (GO:0030151);; Biological Process: nitrate assimilation (GO:0042128);; Molecular Function: molybdopterin cofactor binding (GO:0043546);; Molecular Function: nitrate reduc…	K10534|0|vvi:100264320|K10534 nitrate reductase (NAD(P)H) [EC:1.7.1.1 1.7.1.2 1.7.1.3] | (RefSeq) nitrate reductase [NADH]-like	ko00910:Nitrogen metabolism	[HC]	--	Oxidoreductase NAD-binding domain;; Oxidoreductase FAD-binding domain;; Cytochrome b5-like Heme/Steroid binding domain;; Mo-co oxidoreductase dimerisation domain	Nitrate reductase [NADH] 2 GN=NIA2 OS=Nicotiana tabacum (Common tobacco) PE=2 SV=2	CI	--	PREDICTED: nitrate reductase [NADH] 2 [Sesamum indicum]
F01_transcript_51173	--	--	Biological Process: vegetative to reproductive phase transition of meristem (GO:0010228);; Cellular Component: integral component of membrane (GO:0016021);; Molecular Function: histone methyltransferase activity (H3-K4 specific) (GO:0042800);; Biological Process: carpel development (GO:0048440);; Biological Process: stamen development (GO:0048443);; Biological Process: histone H3-K4 methylation (…	--	--	[BK]	--	--	Probable histone-lysine N-methyltransferase ATXR3 OS=Arabidopsis thaliana (Mouse-ear cress) PE=2 SV=2	S	Function unknown	hypothetical protein [Tragopogon dubius]
F01_transcript_73328	--	--	Molecular Function: protein kinase activity (GO:0004672);; Molecular Function: ATP binding (GO:0005524);; Biological Process: protein phosphorylation (GO:0006468);;	K16196|1.03506e-38|fve:101294328|K16196 eukaryotic translation initiation factor 2-alpha kinase 4 [EC:2.7.11.1] | (RefSeq) probable serine/threonine-protein kinase GCN2	ko04141:Protein processing in endoplasmic reticulum	[J]	Translation, ribosomal structure and biogenesis	--	Probable serine/threonine-protein kinase GCN2 GN=GCN2 OS=Arabidopsis thaliana (Mouse-ear cress) PE=2 SV=2	T	Signal transduction mechanisms	unnamed protein product [Coffea canephora]
F01_transcript_94171	--	--	Cellular Component: cytoplasm (GO:0005737);;	--	--	[Z]	Cytoskeleton	--	--	S	Function unknown	PREDICTED: cysteine-rich PDZ-binding protein [Vitis vinifera]
F01_transcript_81782	[T]	Signal transduction mechanisms	Molecular Function: phosphoprotein phosphatase activity (GO:0004721);; Biological Process: protein dephosphorylation (GO:0006470);;	K04382|2.77352e-167|vvi:100264866|K04382 serine/threonine-protein phosphatase 2A catalytic subunit [EC:3.1.3.16] | (RefSeq) serine/threonine-protein phosphatase PP2A-2 catalytic subunit	ko03015:mRNA surveillance pathway	[T]	Signal transduction mechanisms	Calcineurin-like phosphoesterase	Serine/threonine-protein phosphatase PP2A catalytic subunit GN=PP2A OS=Medicago sativa (Alfalfa) PE=2 SV=1	T	Signal transduction mechanisms	PREDICTED: serine/threonine-protein phosphatase PP2A-2 catalytic subunit [Vitis vinifera]
F01_transcript_123838	[Q]	Secondary metabolites biosynthesis, transport and catabolism	Molecular Function: cellulase activity (GO:0008810);; Cellular Component: integral component of membrane (GO:0016021);; Biological Process: cellulose catabolic process (GO:0030245);;	--	--	--	--	Glycosyl hydrolase family 9;; Glycosyl hydrolase family 9;; Glycosyl hydrolase family 9	Endoglucanase 12 GN=OSJNBa0067K08.14 OS=Oryza sativa subsp. japonica (Rice) PE=2 SV=2	U	Intracellular trafficking, secretion, and vesicular transport	membrane-anchored endo-1,4-beta-glucanase [Gossypium hirsutum]
F01_transcript_66208	[QV]	--	Molecular Function: iron ion binding (GO:0005506);; Cellular Component: mitochondrion (GO:0005739);; Biological Process: unidimensional cell growth (GO:0009826);; Biological Process: positive regulation of flower development (GO:0009911);; Biological Process: response to UV-B (GO:0010224);; Biological Process: brassinosteroid homeostasis (GO:0010268);; Biological Process: pollen exine formation (…	--	--	[QI]	--	Cytochrome P450	Cytochrome P450 90A1 GN=MJJ3.9 OS=Arabidopsis thaliana (Mouse-ear cress) PE=2 SV=1	Q	Secondary metabolites biosynthesis, transport and catabolism	cytochrome P450, putative [Ricinus communis]
F01_transcript_55168	--	--	Molecular Function: protein kinase activity (GO:0004672);; Molecular Function: ATP binding (GO:0005524);; Biological Process: protein phosphorylation (GO:0006468);;	K04733|1.99407e-32|mdm:103423354|K04733 interleukin-1 receptor-associated kinase 4 [EC:2.7.11.1] | (RefSeq) probable receptor-like protein kinase At5g47070	--	[T]	Signal transduction mechanisms	--	Probable receptor-like protein kinase At5g47070 GN=At5g47070 OS=Arabidopsis thaliana (Mouse-ear cress) PE=1 SV=1	T	Signal transduction mechanisms	PREDICTED: LOW QUALITY PROTEIN: probable receptor-like protein kinase At5g47070 [Malus domestica]
F01_transcript_68427	--	--	Molecular Function: DNA binding (GO:0003677);; Cellular Component: nucleus (GO:0005634);; Molecular Function: zinc ion binding (GO:0008270);;	K11649|3.01455e-35|mdm:103454251|K11649 SWI/SNF related-matrix-associated actin-dependent regulator of chromatin subfamily C | (RefSeq) SWI/SNF complex subunit SWI3D	--	[O]	Posttranslational modification, protein turnover, chaperones	--	SWI/SNF complex subunit SWI3D OS=Arabidopsis thaliana (Mouse-ear cress) PE=1 SV=3	BK	--	PREDICTED: SWI/SNF complex subunit SWI3D isoform X1 [Nelumbo nucifera]
F01_transcript_24033	[J]	Translation, ribosomal structure and biogenesis	Molecular Function: structural constituent of ribosome (GO:0003735);; Biological Process: rRNA processing (GO:0006364);; Biological Process: translation (GO:0006412);; Cellular Component: cytosolic small ribosomal subunit (GO:0022627);; Biological Process: ribosomal small subunit biogenesis (GO:0042274);;	--	--	[J]	Translation, ribosomal structure and biogenesis	Ribosomal protein S6e	40S ribosomal protein S6 GN=rps6 OS=Asparagus officinalis (Garden asparagus) PE=2 SV=1	J	Translation, ribosomal structure and biogenesis	hypothetical protein AMTR_s00048p00058600 [Amborella trichopoda]
F01_transcript_66707	--	--	Molecular Function: metal ion binding (GO:0046872);;	--	--	--	--	4F5 protein family	--	S	Function unknown	unnamed protein product [Vitis vinifera]
F01_transcript_41236	--	--	Molecular Function: zinc ion transmembrane transporter activity (GO:0005385);; Cellular Component: extracellular region (GO:0005576);; Cellular Component: endoplasmic reticulum (GO:0005783);; Biological Process: cellular zinc ion homeostasis (GO:0006882);; Cellular Component: integral component of membrane (GO:0016021);; Biological Process: zinc II ion transmembrane transport (GO:0071577);;	K14713|4.84216e-23|pop:POPTR_0008s13930g|K14713 solute carrier family 39 (zinc transporter), member 7 | (RefSeq) POPTRDRAFT_720768; IAA-ALANINE RESISTANCE protein 1	--	[P]	Inorganic ion transport and metabolism	--	IAA-alanine resistance protein 1 (Precursor) GN=IAR1 OS=Arabidopsis thaliana (Mouse-ear cress) PE=1 SV=3	P	Inorganic ion transport and metabolism	IAA-ALANINE RESISTANCE protein 1 [Populus trichocarpa]
F01_transcript_96560	--	--	--	K01681|5.84009e-06|cmo:103495599|K01681 aconitate hydratase [EC:4.2.1.3] | (RefSeq) aconitate hydratase, cytoplasmic	ko00020:Citrate cycle (TCA cycle);ko00630:Glyoxylate and dicarboxylate metabolism;ko01200:Carbon metabolism;ko01210:2-Oxocarboxylic acid metabolism;ko01230:Biosynthesis of amino acids	[AJ]	--	--	Aconitate hydratase, cytoplasmic OS=Cucurbita maxima (Pumpkin) PE=2 SV=1	--	--	--
F01_transcript_58775	[E]	Amino acid transport and metabolism	Molecular Function: aminomethyltransferase activity (GO:0004047);; Cellular Component: mitochondrion (GO:0005739);; Biological Process: glycine catabolic process (GO:0006546);; Molecular Function: transaminase activity (GO:0008483);; Biological Process: methylation (GO:0032259);;	K00605|0|pmum:103324417|K00605 aminomethyltransferase [EC:2.1.2.10] | (RefSeq) aminomethyltransferase, mitochondrial	ko00260:Glycine, serine and threonine metabolism;ko00630:Glyoxylate and dicarboxylate metabolism;ko00670:One carbon pool by folate;ko01200:Carbon metabolism	[E]	Amino acid transport and metabolism	Aminomethyltransferase folate-binding domain;; Glycine cleavage T-protein C-terminal barrel domain	Aminomethyltransferase, mitochondrial (Precursor) GN=GDCST OS=Flaveria anomala (Yellowtops) PE=3 SV=1	E	Amino acid transport and metabolism	PREDICTED: aminomethyltransferase, mitochondrial [Prunus mume]
F01_transcript_85892	--	--	Molecular Function: actin binding (GO:0003779);; Cellular Component: cytosol (GO:0005829);; Biological Process: cytoskeleton organization (GO:0007010);; Biological Process: unidimensional cell growth (GO:0009826);;	K17261|0|vvi:100853345|K17261 adenylyl cyclase-associated protein | (RefSeq) cyclase-associated protein 1	--	[ZT]	--	Adenylate cyclase associated (CAP) N terminal;; Adenylate cyclase associated (CAP) C terminal	Cyclase-associated protein 1 GN=CAP1 OS=Arabidopsis thaliana (Mouse-ear cress) PE=2 SV=1	S	Function unknown	unnamed protein product [Coffea canephora]
F01_transcript_11371	[R]	General function prediction only	Molecular Function: protein serine/threonine kinase activity (GO:0004674);; Molecular Function: ATP binding (GO:0005524);; Biological Process: protein phosphorylation (GO:0006468);;	K02208|0|sot:102591634|K02208 cyclin-dependent kinase 8/11 [EC:2.7.11.22 2.7.11.23] | (RefSeq) cyclin-dependent kinase E-1	--	[K]	Transcription	Protein kinase domain;; Protein tyrosine kinase	Cyclin-dependent kinase E-1 GN=MBK5.8 OS=Arabidopsis thaliana (Mouse-ear cress) PE=1 SV=2	T	Signal transduction mechanisms	PREDICTED: cyclin-dependent kinase E-1-like isoform X1 [Solanum tuberosum]
F01_transcript_48010	--	--	Molecular Function: D-arabinono-1,4-lactone oxidase activity (GO:0003885);; Cellular Component: mitochondrion (GO:0005739);; Cellular Component: plastid (GO:0009536);; Cellular Component: integral component of membrane (GO:0016021);; Molecular Function: galactonolactone dehydrogenase activity (GO:0016633);; Molecular Function: flavin adenine dinucleotide binding (GO:0050660);; Biological Process:…	K00225|9.99667e-107|vvi:100233005|K00225 L-galactono-1,4-lactone dehydrogenase [EC:1.3.2.3] | (RefSeq) L-galactono-1,4-lactone dehydrogenase, mitochondrial	ko00053:Ascorbate and aldarate metabolism	[V]	Defense mechanisms	--	L-galactono-1,4-lactone dehydrogenase, mitochondrial (Precursor) GN=GLDH OS=Arabidopsis thaliana (Mouse-ear cress) PE=1 SV=1	C	Energy production and conversion	L-galactono-1,4-lactone dehydrogenase [Actinidia deliciosa]
F01_transcript_92771	--	--	Cellular Component: membrane (GO:0016020);;	--	--	--	--	--	Protein YLS3 (Precursor) GN=YLS3 OS=Arabidopsis thaliana (Mouse-ear cress) PE=2 SV=1	S	Function unknown	unnamed protein product [Coffea canephora]
F01_transcript_104861	[V]	Defense mechanisms	Biological Process: drug transmembrane transport (GO:0006855);; Molecular Function: drug transmembrane transporter activity (GO:0015238);; Molecular Function: antiporter activity (GO:0015297);; Cellular Component: integral component of membrane (GO:0016021);;	--	--	[R]	General function prediction only	MatE;; Polysaccharide biosynthesis C-terminal domain;; MatE	MATE efflux family protein 1 GN=F11M15.20 OS=Arabidopsis thaliana (Mouse-ear cress) PE=2 SV=2	V	Defense mechanisms	PREDICTED: MATE efflux family protein 1 [Prunus mume]
F01_transcript_78769	--	--	Molecular Function: transcription factor activity, sequence-specific DNA binding (GO:0003700);; Biological Process: regulation of transcription, DNA-templated (GO:0006355);; Molecular Function: sequence-specific DNA binding (GO:0043565);;	K09060|1.24266e-11|vvi:100248302|K09060 plant G-box-binding factor | (RefSeq) common plant regulatory factor 1	--	--	--	Disordered region downstream of MFMR	Common plant regulatory factor 1 GN=CPRF1 OS=Petroselinum crispum (Parsley) PE=2 SV=1	K	Transcription	hypothetical protein VITISV_022855 [Vitis vinifera]
F01_transcript_13459	--	--	Molecular Function: transporter activity (GO:0005215);; Biological Process: transport (GO:0006810);; Cellular Component: integral component of membrane (GO:0016021);;	--	--	[T]	Signal transduction mechanisms	Organic solute transporter Ostalpha	--	S	Function unknown	unnamed protein product [Coffea canephora]
F01_transcript_58263	--	--	Cellular Component: endomembrane system (GO:0012505);; Cellular Component: membrane (GO:0016020);; Cellular Component: membrane-bounded organelle (GO:0043227);; Cellular Component: intracellular organelle (GO:0043229);; Cellular Component: cytoplasmic part (GO:0044444);;	--	--	--	--	--	--	S	Function unknown	PREDICTED: uncharacterized protein LOC100254757 isoform X1 [Vitis vinifera]
F01_transcript_115845	--	--	Cellular Component: nucleosome (GO:0000786);; Cellular Component: nucleus (GO:0005634);; Biological Process: nucleosome assembly (GO:0006334);; Cellular Component: plastid (GO:0009536);; Molecular Function: nucleosomal DNA binding (GO:0031492);; Molecular Function: protein heterodimerization activity (GO:0046982);;	K11253|1.80872e-71|tcc:TCM_040553|K11253 histone H3 | (RefSeq) Histone superfamily protein	--	[B]	Chromatin structure and dynamics	Core histone H2A/H2B/H3/H4	Histone H3.2 OS=Triticum aestivum (Wheat) PE=1 SV=2	B	Chromatin structure and dynamics	Histone superfamily protein [Theobroma cacao]
F01_transcript_45700	--	--	--	--	--	--	--	--	--	L	Replication, recombination and repair	putative plant disease resistance polyprotein [Oryza sativa Japonica Group]
F01_transcript_53386	--	--	Cellular Component: protein phosphatase type 2A complex (GO:0000159);; Biological Process: signal transduction (GO:0007165);; Cellular Component: integral component of membrane (GO:0016021);; Biological Process: regulation of phosphoprotein phosphatase activity (GO:0034047);;	K11584|0|tcc:TCM_037948|K11584 serine/threonine-protein phosphatase 2A regulatory subunit B' | (RefSeq) Serine/threonine protein phosphatase 2A 57 kDa regulatory subunit B' iota isoform 1	ko03015:mRNA surveillance pathway	[T]	Signal transduction mechanisms	Protein phosphatase 2A regulatory B subunit (B56 family)	Serine/threonine protein phosphatase 2A 57 kDa regulatory subunit B&apos; iota isoform GN=B&apos;IOTA OS=Arabidopsis thaliana (Mouse-ear cress) PE=2 SV=1	T	Signal transduction mechanisms	Serine/threonine protein phosphatase 2A 57 kDa regulatory subunit B&apos; iota isoform 1 [Theobroma cacao]
F01_transcript_55615	--	--	Biological Process: sulfate assimilation (GO:0000103);; Cellular Component: cytoplasm (GO:0005737);; Biological Process: protein folding (GO:0006457);; Molecular Function: protein disulfide oxidoreductase activity (GO:0015035);; Molecular Function: oxidoreductase activity, acting on a sulfur group of donors, disulfide as acceptor (GO:0016671);; Biological Process: cellular response to oxidative s…	--	--	[O]	Posttranslational modification, protein turnover, chaperones	PITH domain	PITH domain-containing protein At3g04780 GN=At3g04780 OS=Arabidopsis thaliana (Mouse-ear cress) PE=1 SV=2	O	Posttranslational modification, protein turnover, chaperones	PREDICTED: PITH domain-containing protein At3g04780 isoform X2 [Vitis vinifera]
F01_transcript_117580	[T]	Signal transduction mechanisms	Molecular Function: acyl binding (GO:0000035);; Cellular Component: endosome (GO:0005768);; Cellular Component: trans-Golgi network (GO:0005802);; Molecular Function: zinc ion binding (GO:0008270);; Biological Process: cell tip growth (GO:0009932);; Cellular Component: integral component of membrane (GO:0016021);; Molecular Function: protein-cysteine S-palmitoyltransferase activity (GO:0019706);;	K20032|0|pper:PRUPE_ppa002724mg|K20032 palmitoyltransferase ZDHHC13/17 [EC:2.3.1.225] | (RefSeq) hypothetical protein	--	[R]	General function prediction only	Ankyrin repeats (3 copies);; Ankyrin repeats (many copies);; Ankyrin repeats (many copies);; Ankyrin repeat;; Ankyrin repeat;; DHHC palmitoyltransferase	Protein S-acyltransferase 24 GN=F5O24.240 OS=Arabidopsis thaliana (Mouse-ear cress) PE=2 SV=1	S	Function unknown	hypothetical protein PRUPE_ppa002724mg [Prunus persica]
F01_transcript_125020	[K]	Transcription	Molecular Function: methyltransferase activity (GO:0008168);; Cellular Component: integral component of membrane (GO:0016021);; Biological Process: methylation (GO:0032259);; Biological Process: transmembrane transport (GO:0055085);;	--	--	[J]	Translation, ribosomal structure and biogenesis	--	--	J	Translation, ribosomal structure and biogenesis	conserved hypothetical protein [Ricinus communis]
F01_transcript_138615	--	--	Molecular Function: translation elongation factor activity (GO:0003746);; Molecular Function: GTPase activity (GO:0003924);; Molecular Function: GTP binding (GO:0005525);; Cellular Component: cytoplasm (GO:0005737);; Biological Process: translational elongation (GO:0006414);;	K03231|2.97229e-24|crb:CARUB_v100096370m|K03231 elongation factor 1-alpha | (RefSeq) hypothetical protein	ko03013:RNA transport	[J]	Translation, ribosomal structure and biogenesis	--	Elongation factor 1-alpha 4 GN=A4 OS=Arabidopsis thaliana (Mouse-ear cress) PE=1 SV=2	J	Translation, ribosomal structure and biogenesis	elongation factor 1 alpha, partial [Brassica oleracea var. viridis]
F01_transcript_145484	--	--	Cellular Component: nucleolus (GO:0005730);; Cellular Component: cytosol (GO:0005829);; Biological Process: RNA splicing (GO:0008380);; Cellular Component: chloroplast (GO:0009507);; Biological Process: production of ta-siRNAs involved in RNA interference (GO:0010267);; Cellular Component: nuclear dicing body (GO:0010445);; Cellular Component: nuclear speck (GO:0016607);; Biological Process: prim…	--	--	[R]	General function prediction only	Arsenite-resistance protein 2	Serrate RNA effector molecule GN=SE OS=Arabidopsis thaliana (Mouse-ear cress) PE=1 SV=2	K	Transcription	PREDICTED: serrate RNA effector molecule [Vitis vinifera]
F01_transcript_114357	[J]	Translation, ribosomal structure and biogenesis	Molecular Function: ATP-dependent RNA helicase activity (GO:0004004);; Molecular Function: ATP binding (GO:0005524);; Cellular Component: nucleus (GO:0005634);; Cellular Component: cytoplasm (GO:0005737);; Biological Process: RNA processing (GO:0006396);; Molecular Function: RNA binding (GO:0044822);;	K12820|0|cam:101498048|K12820 pre-mRNA-splicing factor ATP-dependent RNA helicase DHX15/PRP43 [EC:3.6.4.13] | (RefSeq) probable pre-mRNA-splicing factor ATP-dependent RNA helicase	ko03040:Spliceosome	[A]	RNA processing and modification	Helicase associated domain (HA2);; Oligonucleotide/oligosaccharide-binding (OB)-fold;; Helicase conserved C-terminal domain;; AAA domain;; DEAD/DEAH box helicase	Probable pre-mRNA-splicing factor ATP-dependent RNA helicase GN=At2g47250 OS=Arabidopsis thaliana (Mouse-ear cress) PE=2 SV=1	L	Replication, recombination and repair	PREDICTED: probable pre-mRNA-splicing factor ATP-dependent RNA helicase-like [Cicer arietinum]
F01_transcript_74040	--	--	--	K00908|1.52882e-75|gmx:100816625|K00908 calcium/calmodulin-dependent protein kinase kinase 1 [EC:2.7.11.17] | (RefSeq) serine/threonine-protein kinase GRIK2-like	--	[T]	Signal transduction mechanisms	--	Serine/threonine-protein kinase GRIK2 GN=MUF9.18 OS=Arabidopsis thaliana (Mouse-ear cress) PE=1 SV=1	T	Signal transduction mechanisms	PREDICTED: serine/threonine-protein kinase GRIK2-like isoform X3 [Glycine max]
F01_transcript_116283	--	--	Biological Process: ubiquitin-dependent protein catabolic process (GO:0006511);; Cellular Component: integral component of membrane (GO:0016021);; Biological Process: protein deubiquitination (GO:0016579);; Molecular Function: thiol-dependent ubiquitinyl hydrolase activity (GO:0036459);; Molecular Function: metal ion binding (GO:0046872);;	K11855|4.45484e-47|mdm:103422928|K11855 ubiquitin carboxyl-terminal hydrolase 36/42 [EC:3.4.19.12] | (RefSeq) ubiquitin carboxyl-terminal hydrolase 17-like	--	[O]	Posttranslational modification, protein turnover, chaperones	Ubiquitin carboxyl-terminal hydrolase	Ubiquitin carboxyl-terminal hydrolase 16 GN=UBP16 OS=Arabidopsis thaliana (Mouse-ear cress) PE=1 SV=1	O	Posttranslational modification, protein turnover, chaperones	PREDICTED: ubiquitin carboxyl-terminal hydrolase 16-like [Nicotiana tomentosiformis]
F01_transcript_49746	--	--	Cellular Component: membrane (GO:0016020);; Molecular Function: metal ion binding (GO:0046872);;	--	--	--	--	RING-type zinc-finger;; Ring finger domain;; zinc-RING finger domain	--	S	Function unknown	PREDICTED: E3 ubiquitin-protein ligase RNF182-like [Nicotiana sylvestris]
F01_transcript_106515	[C]	Energy production and conversion	Molecular Function: malate dehydrogenase (decarboxylating) (NAD+) activity (GO:0004471);; Molecular Function: malate dehydrogenase (decarboxylating) (NADP+) activity (GO:0004473);; Biological Process: pyruvate metabolic process (GO:0006090);; Biological Process: malate metabolic process (GO:0006108);; Biological Process: fatty acid biosynthetic process (GO:0006633);; Molecular Function: zinc ion …	K00029|4.18677e-29|eus:EUTSA_v10018247mg|K00029 malate dehydrogenase (oxaloacetate-decarboxylating)(NADP+) [EC:1.1.1.40] | (RefSeq) hypothetical protein	ko00620:Pyruvate metabolism;ko00710:Carbon fixation in photosynthetic organisms;ko01200:Carbon metabolism	[C]	Energy production and conversion	--	NADP-dependent malic enzyme 4, chloroplastic (Precursor) GN=NADP-ME4 OS=Arabidopsis thaliana (Mouse-ear cress) PE=1 SV=1	C	Energy production and conversion	hypothetical protein CISIN_1g007703mg [Citrus sinensis]
F01_transcript_89974	--	--	Cellular Component: membrane (GO:0016020);;	--	--	--	--	WSTF, HB1, Itc1p, MBD9 motif 1	--	S	Function unknown	PREDICTED: remodeling and spacing factor 1 [Vitis vinifera]
F01_transcript_6979	[K]	Transcription	--	--	--	[R]	General function prediction only	F-box domain	F-box protein At-B GN=ATB OS=Arabidopsis thaliana (Mouse-ear cress) PE=2 SV=1	S	Function unknown	PREDICTED: F-box protein At-B [Vitis vinifera]
F01_transcript_122910	--	--	Cellular Component: exocyst (GO:0000145);; Cellular Component: cytosol (GO:0005829);; Cellular Component: plasma membrane (GO:0005886);; Biological Process: exocytosis (GO:0006887);;	K07195|0|vvi:100268151|K07195 exocyst complex component 7 | (RefSeq) exocyst complex component EXO70B1	--	[U]	Intracellular trafficking, secretion, and vesicular transport	Exo70 exocyst complex subunit	Exocyst complex component EXO70B1 GN=EXO70B1 OS=Arabidopsis thaliana (Mouse-ear cress) PE=1 SV=1	S	Function unknown	PREDICTED: exocyst complex component EXO70B1 [Vitis vinifera]
F01_transcript_54948	--	--	--	K09422|3.60676e-153|vvi:100241618|K09422 myb proto-oncogene protein, plant | (RefSeq) protein ODORANT1	--	[K]	Transcription	Myb-like DNA-binding domain;; Myb-like DNA-binding domain	Transcription factor MYB86 GN=F21E10.4 OS=Arabidopsis thaliana (Mouse-ear cress) PE=2 SV=1	K	Transcription	PREDICTED: protein ODORANT1 isoform X1 [Vitis vinifera]
F01_transcript_141595	--	--	Molecular Function: RNA polymerase I CORE element sequence-specific DNA binding (GO:0001164);; Molecular Function: transcription factor activity, RNA polymerase I CORE element binding transcription factor recruiting (GO:0001187);; Cellular Component: RNA polymerase transcription factor SL1 complex (GO:0005668);; Cellular Component: RNA polymerase I core factor complex (GO:0070860);;	--	--	[S]	Function unknown	Zinc-finger of RNA-polymerase I-specific TFIIB, Rrn7	TATA box-binding protein-associated factor RNA polymerase I subunit B GN=T17M13 OS=Arabidopsis thaliana (Mouse-ear cress) PE=1 SV=1	K	Transcription	PREDICTED: TATA box-binding protein-associated factor RNA polymerase I subunit B isoform X2 [Nicotiana tomentosiformis]
F01_transcript_109694	--	--	--	--	--	--	--	--	Coiled-coil domain-containing protein SCD2 {ECO:0000305} OS=Arabidopsis thaliana (Mouse-ear cress) PE=1 SV=1	S	Function unknown	unnamed protein product [Coffea canephora]
F01_transcript_123634	[O]	Posttranslational modification, protein turnover, chaperones	Molecular Function: GTPase activity (GO:0003924);; Molecular Function: GTP binding (GO:0005525);; Biological Process: response to oxidative stress (GO:0006979);; Molecular Function: peptide-methionine (S)-S-oxide reductase activity (GO:0008113);; Biological Process: protein repair (GO:0030091);; Biological Process: oxidation-reduction process (GO:0055114);;	--	--	[UR]	--	Peptide methionine sulfoxide reductase;; WD domain, G-beta repeat	Dynamin-related protein 1E GN=T2O9.170 OS=Arabidopsis thaliana (Mouse-ear cress) PE=1 SV=1	S	Function unknown	PREDICTED: peptide methionine sulfoxide reductase A5 isoform X2 [Nelumbo nucifera]
F01_transcript_52236	--	--	Cellular Component: chloroplast thylakoid membrane (GO:0009535);; Cellular Component: integral component of membrane (GO:0016021);; Biological Process: divalent metal ion transport (GO:0070838);;	--	--	--	--	Protein of unknown function (DUF1118)	--	S	Function unknown	PREDICTED: uncharacterized protein LOC100250168 [Vitis vinifera]
F01_transcript_88640	--	--	Molecular Function: protein serine/threonine kinase activity (GO:0004674);; Molecular Function: ATP binding (GO:0005524);; Cellular Component: nucleus (GO:0005634);; Cellular Component: cytoplasm (GO:0005737);; Biological Process: protein phosphorylation (GO:0006468);; Cellular Component: integral component of membrane (GO:0016021);; Biological Process: intracellular signal transduction (GO:00355…	K14498|1.8493e-37|fve:101302558|K14498 serine/threonine-protein kinase SRK2 [EC:2.7.11.1] | (RefSeq) serine/threonine-protein kinase SRK2A	ko04075:Plant hormone signal transduction	[T]	Signal transduction mechanisms	--	Serine/threonine-protein kinase SRK2B GN=T7P1.8 OS=Arabidopsis thaliana (Mouse-ear cress) PE=1 SV=1	T	Signal transduction mechanisms	PREDICTED: serine/threonine-protein kinase SRK2B-like [Fragaria vesca subsp. vesca]
F01_transcript_11150	[J]	Translation, ribosomal structure and biogenesis	Molecular Function: nucleic acid binding (GO:0003676);; Molecular Function: asparagine-tRNA ligase activity (GO:0004816);; Molecular Function: ATP binding (GO:0005524);; Cellular Component: cytoplasm (GO:0005737);; Biological Process: asparaginyl-tRNA aminoacylation (GO:0006421);;	K01893|0|vvi:100257593|K01893 asparaginyl-tRNA synthetase [EC:6.1.1.22] | (RefSeq) asparagine--tRNA ligase, cytoplasmic 1	ko00970:Aminoacyl-tRNA biosynthesis	[J]	Translation, ribosomal structure and biogenesis	tRNA synthetases class II (D, K and N);; OB-fold nucleic acid binding domain	Asparagine--tRNA ligase, cytoplasmic 1 GN=MIK19.13 OS=Arabidopsis thaliana (Mouse-ear cress) PE=1 SV=1	J	Translation, ribosomal structure and biogenesis	PREDICTED: asparagine--tRNA ligase, cytoplasmic 1 [Vitis vinifera]
F01_transcript_44352	[K]	Transcription	Cellular Component: cytosol (GO:0005829);; Molecular Function: ligase activity (GO:0016874);;	K10268|3.27234e-145|vvi:100243447|K10268 F-box and leucine-rich repeat protein 2/20 | (RefSeq) F-box protein At3g58530	--	[R]	General function prediction only	--	F-box protein At3g58530 GN=At3g58530 OS=Arabidopsis thaliana (Mouse-ear cress) PE=2 SV=1	S	Function unknown	PREDICTED: F-box protein At3g58530 isoform X3 [Vitis vinifera]
F01_transcript_102823	[G]	Carbohydrate transport and metabolism	Biological Process: carbohydrate transport (GO:0008643);; Cellular Component: integral component of membrane (GO:0016021);; Molecular Function: substrate-specific transmembrane transporter activity (GO:0022891);; Molecular Function: 2-alkenal reductase [NAD(P)] activity (GO:0032440);; Biological Process: transmembrane transport (GO:0055085);; Biological Process: oxidation-reduction process (GO:00…	--	--	[R]	General function prediction only	Sugar (and other) transporter;; Major Facilitator Superfamily	Probable plastidic glucose transporter 2 GN=At1g67300 OS=Arabidopsis thaliana (Mouse-ear cress) PE=2 SV=1	G	Carbohydrate transport and metabolism	hexose transporter family protein [Populus trichocarpa]
F01_transcript_94988	[G]	Carbohydrate transport and metabolism	Biological Process: glycogen catabolic process (GO:0005980);; Molecular Function: glycogen phosphorylase activity (GO:0008184);; Biological Process: response to water deprivation (GO:0009414);; Cellular Component: amyloplast (GO:0009501);; Cellular Component: chloroplast stroma (GO:0009570);; Molecular Function: pyridoxal phosphate binding (GO:0030170);; Molecular Function: identical protein bind…	K00688|0|sot:102596766|K00688 glycogen phosphorylase [EC:2.4.1.1] | (RefSeq) glgP; alpha-1,4 glucan phosphorylase L-1 isozyme, chloroplastic/amyloplastic-like	ko00500:Starch and sucrose metabolism	[G]	Carbohydrate transport and metabolism	Carbohydrate phosphorylase	Alpha-1,4 glucan phosphorylase L-1 isozyme, chloroplastic/amyloplastic (Precursor) OS=Solanum tuberosum (Potato) PE=1 SV=2	G	Carbohydrate transport and metabolism	PREDICTED: alpha-1,4 glucan phosphorylase L-1 isozyme, chloroplastic/amyloplastic [Nicotiana tomentosiformis]
F01_transcript_143221	--	--	Molecular Function: prenylcysteine oxidase activity (GO:0001735);; Cellular Component: vacuolar membrane (GO:0005774);; Biological Process: abscisic acid-activated signaling pathway (GO:0009738);; Biological Process: prenylated protein catabolic process (GO:0030327);; Biological Process: prenylcysteine catabolic process (GO:0030328);; Biological Process: farnesyl diphosphate metabolic process (GO…	--	--	--	--	--	Farnesylcysteine lyase (Precursor) GN=FLCY OS=Arabidopsis thaliana (Mouse-ear cress) PE=1 SV=1	O	Posttranslational modification, protein turnover, chaperones	PREDICTED: farnesylcysteine lyase-like [Nicotiana tomentosiformis]
F01_transcript_73443	--	--	Molecular Function: tRNA binding (GO:0000049);; Molecular Function: methionine-tRNA ligase activity (GO:0004825);; Molecular Function: ATP binding (GO:0005524);; Cellular Component: cytosol (GO:0005829);; Biological Process: methionyl-tRNA aminoacylation (GO:0006431);;	K01874|4.41396e-09|tcc:TCM_020274|K01874 methionyl-tRNA synthetase [EC:6.1.1.10] | (RefSeq) Methionine--tRNA ligase / methionyl-tRNA synthetase / MetRS, putative isoform 1	ko00450:Selenocompound metabolism;ko00970:Aminoacyl-tRNA biosynthesis	[J]	Translation, ribosomal structure and biogenesis	--	Probable methionine--tRNA ligase OS=Oryza sativa subsp. japonica (Rice) PE=2 SV=2	J	Translation, ribosomal structure and biogenesis	Methionine--tRNA ligase / methionyl-tRNA synthetase / MetRS, putative isoform 2 [Theobroma cacao]
F01_transcript_39688	[R]	General function prediction only	--	--	--	[O]	Posttranslational modification, protein turnover, chaperones	Peptidase family M48	--	O	Posttranslational modification, protein turnover, chaperones	PREDICTED: uncharacterized protein LOC100799127 [Glycine max]
F01_transcript_87970	--	--	--	--	--	[V]	Defense mechanisms	HEAT-like repeat;; HEAT repeat;; HEAT repeats;; Armadillo/beta-catenin-like repeat	Phosphoglucan phosphatase LSF2, chloroplastic (Precursor) GN=LSF2 OS=Arabidopsis thaliana (Mouse-ear cress) PE=1 SV=1	S	Function unknown	PREDICTED: HEAT repeat-containing protein 6 [Vitis vinifera]
F01_transcript_54159	[O]	Posttranslational modification, protein turnover, chaperones	Molecular Function: ATP binding (GO:0005524);; Molecular Function: 2-alkenal reductase [NAD(P)] activity (GO:0032440);; Biological Process: oxidation-reduction process (GO:0055114);;	--	--	[O]	Posttranslational modification, protein turnover, chaperones	Hsp70 protein;; MreB/Mbl protein	Heat shock cognate 70 kDa protein 2 GN=HSC-2 OS=Solanum lycopersicum (Tomato) PE=1 SV=1	O	Posttranslational modification, protein turnover, chaperones	heat shock protein, putative [Ricinus communis]
F01_transcript_6408	--	--	Cellular Component: integral component of membrane (GO:0016021);;	K17086|0|pxb:103955985|K17086 transmembrane 9 superfamily member 2/4 | (RefSeq) transmembrane 9 superfamily member 10-like	--	[U]	Intracellular trafficking, secretion, and vesicular transport	Endomembrane protein 70	Transmembrane 9 superfamily member 8 {ECO:0000305} (Precursor) OS=Arabidopsis thaliana (Mouse-ear cress) PE=2 SV=1	S	Function unknown	PREDICTED: transmembrane 9 superfamily member 4-like [Nelumbo nucifera]
F01_transcript_33791	--	--	Molecular Function: nucleotide binding (GO:0000166);; Molecular Function: nucleic acid binding (GO:0003676);; Biological Process: mRNA processing (GO:0006397);;	K12822|2.99214e-155|pop:POPTR_0008s14630g|K12822 RNA-binding protein 25 | (RefSeq) hypothetical protein	ko03040:Spliceosome	[A]	RNA processing and modification	PWI domain;; RNA recognition motif. (a.k.a. RRM, RBD, or RNP domain)	--	S	Function unknown	PREDICTED: RNA-binding protein 25 isoform X2 [Nicotiana tomentosiformis]
F01_transcript_115471	--	--	Cellular Component: Golgi membrane (GO:0000139);; Molecular Function: structural molecule activity (GO:0005198);; Biological Process: intracellular protein transport (GO:0006886);; Biological Process: vesicle-mediated transport (GO:0016192);; Cellular Component: COPI vesicle coat (GO:0030126);;	--	--	[U]	Intracellular trafficking, secretion, and vesicular transport	--	Coatomer subunit gamma-2 OS=Oryza sativa subsp. japonica (Rice) PE=2 SV=1	U	Intracellular trafficking, secretion, and vesicular transport	hypothetical protein MIMGU_mgv1a001108mg [Erythranthe guttata]
F01_transcript_108169	[R]	General function prediction only	Molecular Function: ubiquitin-protein transferase activity (GO:0004842);; Biological Process: protein ubiquitination (GO:0016567);; Molecular Function: ligase activity (GO:0016874);;	K10599|0|vvi:100249408|K10599 pre-mRNA-processing factor 19 [EC:2.3.2.27] | (RefSeq) pre-mRNA-processing factor 19	ko03040:Spliceosome;ko04120:Ubiquitin mediated proteolysis	[R]	General function prediction only	Prp19/Pso4-like;; WD domain, G-beta repeat;; Anaphase-promoting complex subunit 4 WD40 domain	Pre-mRNA-processing factor 19 {ECO:0000305} OS=Oryza sativa subsp. japonica (Rice) PE=2 SV=1	A	RNA processing and modification	PREDICTED: pre-mRNA-processing factor 19 [Vitis vinifera]
F01_transcript_77388	--	--	Biological Process: RNA methylation (GO:0001510);; Biological Process: chromatin assembly or disassembly (GO:0006333);;	--	--	[S]	Function unknown	Uncharacterized conserved protein (DUF2039)	--	S	Function unknown	PREDICTED: protein IFH1-like [Cicer arietinum]
F01_transcript_94415	[O]	Posttranslational modification, protein turnover, chaperones	Molecular Function: nucleotide binding (GO:0000166);; Molecular Function: ATP-dependent peptidase activity (GO:0004176);; Cellular Component: peroxisomal matrix (GO:0005782);; Biological Process: misfolded or incompletely synthesized protein catabolic process (GO:0006515);; Molecular Function: serine-type peptidase activity (GO:0008236);; Biological Process: protein processing (GO:0016485);; Biol…	K01338|3.02873e-64|pop:POPTR_0001s03160g|K01338 ATP-dependent Lon protease [EC:3.4.21.53] | (RefSeq) Lon protease 1 family protein	--	[O]	Posttranslational modification, protein turnover, chaperones	ATPase family associated with various cellular activities (AAA);; AAA domain (dynein-related subfamily);; ATPase family associated with various cellular activities (AAA)	Lon protease homolog 2, peroxisomal {ECO:0000255|HAMAP-Rule:MF_03121} GN=LON2 OS=Arabidopsis thaliana (Mouse-ear cress) PE=2 SV=1	O	Posttranslational modification, protein turnover, chaperones	unknown [Zea mays]
F01_transcript_79655	--	--	Cellular Component: membrane (GO:0016020);;	--	--	[R]	General function prediction only	Leucine rich repeat N-terminal domain	--	S	Function unknown	hypothetical protein CISIN_1g045139mg [Citrus sinensis]
F01_transcript_77795	--	--	Molecular Function: protein serine/threonine phosphatase activity (GO:0004722);; Biological Process: protein dephosphorylation (GO:0006470);; Cellular Component: integral component of membrane (GO:0016021);; Molecular Function: metal ion binding (GO:0046872);;	K17499|5.94575e-45|cam:101515345|K17499 protein phosphatase 1G [EC:3.1.3.16] | (RefSeq) probable protein phosphatase 2C 60	--	[T]	Signal transduction mechanisms	Protein phosphatase 2C	Probable protein phosphatase 2C 60 GN=At4g31860 OS=Arabidopsis thaliana (Mouse-ear cress) PE=2 SV=1	T	Signal transduction mechanisms	hypothetical protein MTR_3g105880 [Medicago truncatula]
F01_transcript_25236	--	--	Molecular Function: cysteine-type endopeptidase inhibitor activity (GO:0004869);; Cellular Component: endoplasmic reticulum (GO:0005783);; Cellular Component: cytosol (GO:0005829);; Biological Process: hyperosmotic response (GO:0006972);; Biological Process: response to oxidative stress (GO:0006979);; Molecular Function: peptidase activity (GO:0008233);; Biological Process: response to cold (GO:0…	--	--	--	--	Aspartic acid proteinase inhibitor;; Cystatin domain	Cysteine proteinase inhibitor 6 (Precursor) GN=CYS6 OS=Arabidopsis thaliana (Mouse-ear cress) PE=1 SV=2	O	Posttranslational modification, protein turnover, chaperones	unnamed protein product [Coffea canephora]
F01_transcript_20915	[P]	Inorganic ion transport and metabolism	Molecular Function: magnesium ion binding (GO:0000287);; Cellular Component: cytoplasm (GO:0005737);; Biological Process: sulfur compound metabolic process (GO:0006790);; Molecular Function: 3'(2'),5'-bisphosphate nucleotidase activity (GO:0008441);; Biological Process: dephosphorylation (GO:0016311);; Biological Process: phosphatidylinositol phosphorylation (GO:0046854);;	K15422|0|sly:101267407|K15422 3'(2'), 5'-bisphosphate nucleotidase / inositol polyphosphate 1-phosphatase [EC:3.1.3.7 3.1.3.57] | (RefSeq) SAL1 phosphatase	ko00562:Inositol phosphate metabolism;ko00920:Sulfur metabolism;ko04070:Phosphatidylinositol signaling system	[FP]	--	Inositol monophosphatase family	SAL1 phosphatase GN=MBM17.8 OS=Arabidopsis thaliana (Mouse-ear cress) PE=1 SV=1	P	Inorganic ion transport and metabolism	PREDICTED: SAL1 phosphatase [Solanum lycopersicum]
F01_transcript_140024	--	--	Molecular Function: DNA binding (GO:0003677);;	K09419|5.29036e-28|tcc:TCM_024565|K09419 heat shock transcription factor, other eukaryote | (RefSeq) Heat shock factor protein, putative	--	[K]	Transcription	--	Heat stress transcription factor B-3 GN=T32G6.21 OS=Arabidopsis thaliana (Mouse-ear cress) PE=2 SV=1	K	Transcription	PREDICTED: heat stress transcription factor B-3-like [Populus euphratica]
F01_transcript_99424	--	--	Cellular Component: integral component of membrane (GO:0016021);;	--	--	[S]	Function unknown	PQ loop repeat	--	S	Function unknown	PREDICTED: probable vacuolar amino acid transporter YPQ1 isoform X2 [Vitis vinifera]
F01_transcript_112070	--	--	Molecular Function: double-stranded RNA binding (GO:0003725);; Molecular Function: ribonuclease III activity (GO:0004525);; Cellular Component: nucleus (GO:0005634);; Biological Process: production of siRNA involved in RNA interference (GO:0030422);; Biological Process: primary miRNA processing (GO:0031053);; Biological Process: pre-miRNA processing (GO:0031054);; Biological Process: RNA phosphod…	--	--	--	--	Double-stranded RNA binding motif	Double-stranded RNA-binding protein 4 GN=B1090H08.31 OS=Oryza sativa subsp. japonica (Rice) PE=2 SV=1	S	Function unknown	PREDICTED: double-stranded RNA-binding protein 4 isoform X3 [Vitis vinifera]
F01_transcript_76166	--	--	Molecular Function: zinc ion binding (GO:0008270);;	--	--	[R]	General function prediction only	--	PHD finger protein At1g33420 GN=At1g33420 OS=Arabidopsis thaliana (Mouse-ear cress) PE=1 SV=1	S	Function unknown	hypothetical protein CISIN_1g041853mg, partial [Citrus sinensis]
F01_transcript_68949	--	--	--	--	--	[R]	General function prediction only	--	--	S	Function unknown	PREDICTED: uncharacterized protein LOC100813715 [Glycine max]
F01_transcript_23149	--	--	--	--	--	--	--	--	--	S	Function unknown	PREDICTED: uncharacterized protein LOC104103982 isoform X1 [Nicotiana tomentosiformis]
F01_transcript_120451	--	--	Cellular Component: plasma membrane (GO:0005886);;	--	--	--	--	--	--	S	Function unknown	hypothetical protein JCGZ_02351 [Jatropha curcas]
F01_transcript_83483	--	--	--	--	--	--	--	--	--	K	Transcription	unnamed protein product [Vitis vinifera]
F01_transcript_70676	--	--	Biological Process: response to light stimulus (GO:0009416);; Cellular Component: photosystem I (GO:0009522);; Cellular Component: chloroplast thylakoid membrane (GO:0009535);; Biological Process: photosynthesis, light harvesting in photosystem I (GO:0009768);; Cellular Component: chloroplast envelope (GO:0009941);; Cellular Component: plastoglobule (GO:0010287);; Cellular Component: integral com…	K08908|1.34219e-22|gmx:100802138|K08908 light-harvesting complex I chlorophyll a/b binding protein 2 | (RefSeq) chlorophyll a-b binding protein 7, chloroplastic	ko00196:Photosynthesis - antenna proteins	--	--	--	Chlorophyll a-b binding protein, chloroplastic (Precursor) OS=Petunia hybrida (Petunia) PE=2 SV=1	S	Function unknown	PREDICTED: chlorophyll a-b binding protein, chloroplastic [Nicotiana tomentosiformis]
F01_transcript_139406	--	--	Cellular Component: Elongator holoenzyme complex (GO:0033588);;	K11375|1.16229e-57|cam:101508335|K11375 elongator complex protein 4 | (RefSeq) elongator complex protein 4	--	[BK]	--	PAXNEB protein	Elongator complex protein 4 GN=F11B9.14 OS=Arabidopsis thaliana (Mouse-ear cress) PE=1 SV=1	K	Transcription	PREDICTED: elongator complex protein 4-like isoform X4 [Cicer arietinum]
F01_transcript_15870	--	--	Molecular Function: transcription coactivator activity (GO:0003713);; Cellular Component: nucleus (GO:0005634);; Biological Process: transcription from RNA polymerase II promoter (GO:0006366);; Molecular Function: zinc ion binding (GO:0008270);; Biological Process: positive regulation of transcription, DNA-templated (GO:0045893);;	--	--	[K]	Transcription	Putative zinc finger motif, C2HC5-type	--	S	Function unknown	PREDICTED: activating signal cointegrator 1 [Vitis vinifera]
F01_transcript_48260	--	--	Cellular Component: nucleus (GO:0005634);; Cellular Component: cytosol (GO:0005829);;	K13106|3.0405e-91|vvi:100245538|K13106 pre-mRNA-splicing factor CWC26 | (RefSeq) BUD13 homolog	--	[S]	Function unknown	Pre-mRNA-splicing factor of RES complex	--	S	Function unknown	PREDICTED: BUD13 homolog [Vitis vinifera]
F01_transcript_83720	[O]	Posttranslational modification, protein turnover, chaperones	Molecular Function: threonine-type endopeptidase activity (GO:0004298);; Cellular Component: nucleus (GO:0005634);; Cellular Component: cytoplasm (GO:0005737);; Cellular Component: proteasome core complex (GO:0005839);; Biological Process: proteolysis involved in cellular protein catabolic process (GO:0051603);;	K02735|3.76628e-142|gmx:100306084|K02735 20S proteasome subunit beta 3 [EC:3.4.25.1] | (RefSeq) uncharacterized LOC100306084	ko03050:Proteasome	[O]	Posttranslational modification, protein turnover, chaperones	Proteasome subunit	Proteasome subunit beta type-3-A GN=F8K7.15 OS=Arabidopsis thaliana (Mouse-ear cress) PE=1 SV=2	O	Posttranslational modification, protein turnover, chaperones	PREDICTED: proteasome subunit beta type-3-A [Sesamum indicum]
F01_transcript_18212	--	--	Molecular Function: methyltransferase activity (GO:0008168);; Biological Process: methylation (GO:0032259);;	--	--	[E]	Amino acid transport and metabolism	Thiopurine S-methyltransferase (TPMT);; Methyltransferase domain	--	S	Function unknown	PREDICTED: methyltransferase-like protein 13 isoform X1 [Vitis vinifera]
F01_transcript_73988	--	--	--	--	--	--	--	--	--	S	Function unknown	PREDICTED: uncharacterized protein LOC105173629 [Sesamum indicum]
F01_transcript_89045	[CHR]	--	Molecular Function: phosphoglycerate dehydrogenase activity (GO:0004617);; Cellular Component: mitochondrion (GO:0005739);; Molecular Function: formate dehydrogenase (NAD+) activity (GO:0008863);; Biological Process: serine family amino acid biosynthetic process (GO:0009070);; Biological Process: formate catabolic process (GO:0042183);; Molecular Function: NAD binding (GO:0051287);; Biological Pr…	--	--	[C]	Energy production and conversion	D-isomer specific 2-hydroxyacid dehydrogenase, NAD binding domain;; Dynamin family	Formate dehydrogenase, mitochondrial (Precursor) GN=FDH1 OS=Solanum tuberosum (Potato) PE=1 SV=2	C	Energy production and conversion	formate dehydrogenase, putative [Ricinus communis]
F01_transcript_130916	--	--	Molecular Function: organic cyclic compound binding (GO:0097159);; Molecular Function: heterocyclic compound binding (GO:1901363);;	K12822|8.95328e-110|pop:POPTR_0008s14630g|K12822 RNA-binding protein 25 | (RefSeq) hypothetical protein	ko03040:Spliceosome	[A]	RNA processing and modification	RNA recognition motif. (a.k.a. RRM, RBD, or RNP domain);; PWI domain	--	S	Function unknown	hypothetical protein POPTR_0008s14630g [Populus trichocarpa]
F01_transcript_93425	--	--	Molecular Function: GTPase activity (GO:0003924);; Molecular Function: GTP binding (GO:0005525);;	K01528|5.60223e-122|vvi:100255051|K01528 dynamin GTPase [EC:3.6.5.5] | (RefSeq) dynamin-2A	ko04144:Endocytosis	[UR]	--	Dynamin GTPase effector domain	Dynamin-2A GN=F14N23.17 OS=Arabidopsis thaliana (Mouse-ear cress) PE=1 SV=2	S	Function unknown	PREDICTED: dynamin-2A [Vitis vinifera]
F01_transcript_120992	--	--	Cellular Component: vacuole (GO:0005773);; Cellular Component: endoplasmic reticulum membrane (GO:0005789);; Cellular Component: Golgi apparatus (GO:0005794);; Biological Process: transport (GO:0006810);; Cellular Component: integral component of membrane (GO:0016021);;	K20347|5.02848e-56|tcc:TCM_020710|K20347 p24 family protein beta-1 | (RefSeq) Emp24/gp25L/p24 family/GOLD family protein isoform 1	--	[U]	Intracellular trafficking, secretion, and vesicular transport	emp24/gp25L/p24 family/GOLD	Transmembrane emp24 domain-containing protein p24beta3 (Precursor) GN=At3g22845 OS=Arabidopsis thaliana (Mouse-ear cress) PE=2 SV=1	U	Intracellular trafficking, secretion, and vesicular transport	Transmembrane emp24 domain-containing protein A [Morus notabilis]
F01_transcript_134249	--	--	Molecular Function: transcription factor activity, sequence-specific DNA binding (GO:0003700);; Biological Process: regulation of transcription, DNA-templated (GO:0006355);; Biological Process: multicellular organism development (GO:0007275);; Biological Process: response to water deprivation (GO:0009414);; Molecular Function: sequence-specific DNA binding (GO:0043565);;	K18835|0|vvi:100261730|K18835 WRKY transcription factor 2 | (RefSeq) probable WRKY transcription factor 2	ko04626:Plant-pathogen interaction	--	--	WRKY DNA -binding domain;; WRKY DNA -binding domain	Probable WRKY transcription factor 2 GN=WRKY2 OS=Arabidopsis thaliana (Mouse-ear cress) PE=2 SV=1	K	Transcription	WRKY7 [Panax quinquefolius]
F01_transcript_57181	--	--	Molecular Function: transcription corepressor activity (GO:0003714);; Cellular Component: nucleus (GO:0005634);; Biological Process: nucleic acid-templated transcription (GO:0097659);;	--	--	--	--	Protein SCAI;; Protein SCAI	--	S	Function unknown	PREDICTED: protein SCAI homolog [Vitis vinifera]
F01_transcript_74546	--	--	Biological Process: nuclear-transcribed mRNA catabolic process, nonsense-mediated decay (GO:0000184);; Cellular Component: P-body (GO:0000932);; Molecular Function: DNA binding (GO:0003677);; Molecular Function: helicase activity (GO:0004386);; Molecular Function: ATP binding (GO:0005524);; Cellular Component: cytosol (GO:0005829);; Cellular Component: plasma membrane (GO:0005886);; Molecular Fun…	K14326|1.56846e-21|eus:EUTSA_v10000743mg|K14326 regulator of nonsense transcripts 1 [EC:3.6.4.-] | (RefSeq) hypothetical protein	ko03013:RNA transport;ko03015:mRNA surveillance pathway	[A]	RNA processing and modification	--	Regulator of nonsense transcripts 1 homolog GN=MQD22.15 OS=Arabidopsis thaliana (Mouse-ear cress) PE=1 SV=2	L	Replication, recombination and repair	hypothetical protein CISIN_1g0010543mg, partial [Citrus sinensis]
F01_transcript_38343	[C]	Energy production and conversion	Molecular Function: glycerol-3-phosphate dehydrogenase [NAD+] activity (GO:0004367);; Biological Process: carbohydrate metabolic process (GO:0005975);; Cellular Component: glycerol-3-phosphate dehydrogenase complex (GO:0009331);; Molecular Function: protein homodimerization activity (GO:0042803);; Biological Process: glycerol-3-phosphate catabolic process (GO:0046168);; Molecular Function: NAD bi…	K00006|1.16533e-117|vvi:100261224|K00006 glycerol-3-phosphate dehydrogenase (NAD+) [EC:1.1.1.8] | (RefSeq) glycerol-3-phosphate dehydrogenase [NAD(+)]	ko00564:Glycerophospholipid metabolism	[C]	Energy production and conversion	NAD-dependent glycerol-3-phosphate dehydrogenase C-terminus	Glycerol-3-phosphate dehydrogenase [NAD(+)] GN=GPDH OS=Cuphea lanceolata (Cigar flower) PE=2 SV=1	C	Energy production and conversion	PREDICTED: glycerol-3-phosphate dehydrogenase [NAD(+)] [Sesamum indicum]
F01_transcript_105881	--	--	Cellular Component: integral component of membrane (GO:0016021);;	--	--	--	--	--	--	S	Function unknown	PREDICTED: uncharacterized protein LOC101292949 [Fragaria vesca subsp. vesca]
F01_transcript_41130	--	--	Cellular Component: integral component of membrane (GO:0016021);;	--	--	--	--	--	60S ribosomal protein L13a-3 GN=RPL13AC OS=Arabidopsis thaliana (Mouse-ear cress) PE=2 SV=1	S	Function unknown	PREDICTED: uncharacterized protein LOC104249646 [Nicotiana sylvestris]
F01_transcript_78672	[G]	Carbohydrate transport and metabolism	Molecular Function: cellulase activity (GO:0008810);; Cellular Component: integral component of membrane (GO:0016021);; Biological Process: cellulose catabolic process (GO:0030245);;	--	--	--	--	Glycosyl hydrolase family 9	Endoglucanase 2 (Precursor) GN=At1g19940 OS=Arabidopsis thaliana (Mouse-ear cress) PE=2 SV=1	G	Carbohydrate transport and metabolism	PREDICTED: endoglucanase 10-like [Eucalyptus grandis]
F01_transcript_29372	[S]	Function unknown	--	--	--	[S]	Function unknown	Protein of unknown function (DUF1674)	--	S	Function unknown	hypothetical protein L484_006836 [Morus notabilis]
F01_transcript_43789	[Q]	Secondary metabolites biosynthesis, transport and catabolism	Cellular Component: nucleus (GO:0005634);; Biological Process: xanthophyll biosynthetic process (GO:0016123);;	--	--	--	--	--	--	S	Function unknown	PREDICTED: uncharacterized protein LOC104433723 isoform X1 [Eucalyptus grandis]
F01_transcript_83529	[V]	Defense mechanisms	Molecular Function: ATP binding (GO:0005524);; Cellular Component: integral component of membrane (GO:0016021);; Molecular Function: ATPase activity, coupled to transmembrane movement of substances (GO:0042626);; Biological Process: transmembrane transport (GO:0055085);;	K05665|0|tcc:TCM_042344|K05665 ATP-binding cassette, subfamily C (CFTR/MRP), member 1 | (RefSeq) Multidrug resistance protein ABC transporter family	--	[Q]	Secondary metabolites biosynthesis, transport and catabolism	ABC transporter;; ABC transporter transmembrane region	ABC transporter C family member 9 GN=T2O9.140 OS=Arabidopsis thaliana (Mouse-ear cress) PE=2 SV=2	V	Defense mechanisms	PREDICTED: putative ABC transporter C family member 15 [Sesamum indicum]
F01_transcript_8086	--	--	Molecular Function: ribonuclease P activity (GO:0004526);; Cellular Component: nucleolar ribonuclease P complex (GO:0005655);; Biological Process: gene silencing by RNA (GO:0031047);; Biological Process: RNA phosphodiester bond hydrolysis, endonucleolytic (GO:0090502);;	--	--	--	--	XH domain;; XS domain;; XS zinc finger domain	Protein INVOLVED IN DE NOVO 2 {ECO:0000303|PubMed:19915591} OS=Arabidopsis thaliana (Mouse-ear cress) PE=1 SV=1	S	Function unknown	PREDICTED: protein INVOLVED IN DE NOVO 2 [Sesamum indicum]
F01_transcript_145746	--	--	Molecular Function: ligase activity (GO:0016874);;	K10268|2.84199e-11|sot:102587135|K10268 F-box and leucine-rich repeat protein 2/20 | (RefSeq) F-box/LRR-repeat protein 3	--	[R]	General function prediction only	--	--	S	Function unknown	PREDICTED: F-box/LRR-repeat protein 3 isoform X2 [Nicotiana tomentosiformis]
F01_transcript_102413	--	--	Molecular Function: DNA binding (GO:0003677);; Molecular Function: RNA binding (GO:0003723);; Cellular Component: nucleus (GO:0005634);; Biological Process: regulation of transcription, DNA-templated (GO:0006355);;	K17943|2.29765e-178|vvi:100243338|K17943 pumilio RNA-binding family | (RefSeq) pumilio homolog 2	--	[J]	Translation, ribosomal structure and biogenesis	Nucleic acid binding protein NABP;; Nucleic acid binding protein NABP;; Pumilio-family RNA binding repeat;; Regulator of chromosome condensation (RCC1) repeat	Pumilio homolog 1 GN=APUM1 OS=Arabidopsis thaliana (Mouse-ear cress) PE=1 SV=1	J	Translation, ribosomal structure and biogenesis	hypothetical protein VITISV_024967 [Vitis vinifera]
F01_transcript_62648	[K]	Transcription	Molecular Function: protein kinase activity (GO:0004672);; Molecular Function: ATP binding (GO:0005524);; Biological Process: protein phosphorylation (GO:0006468);; Cellular Component: integral component of membrane (GO:0016021);;	--	--	--	--	Leucine Rich repeats (2 copies);; Leucine rich repeat;; Leucine Rich Repeat;; Leucine rich repeat N-terminal domain;; Leucine Rich repeat;; Protein tyrosine kinase;; Protein kinase domain	Probable LRR receptor-like serine/threonine-protein kinase At4g20940 GN=At4g20940 OS=Arabidopsis thaliana (Mouse-ear cress) PE=1 SV=1	S	Function unknown	PREDICTED: probable LRR receptor-like serine/threonine-protein kinase At4g20940 [Nicotiana sylvestris]
F01_transcript_119331	--	--	Molecular Function: acyl binding (GO:0000035);; Cellular Component: endosome (GO:0005768);; Cellular Component: trans-Golgi network (GO:0005802);; Molecular Function: zinc ion binding (GO:0008270);; Biological Process: cell tip growth (GO:0009932);; Cellular Component: integral component of membrane (GO:0016021);; Molecular Function: protein-cysteine S-palmitoyltransferase activity (GO:0019706);;	K20032|7.41919e-122|pper:PRUPE_ppa002724mg|K20032 palmitoyltransferase ZDHHC13/17 [EC:2.3.1.225] | (RefSeq) hypothetical protein	--	[R]	General function prediction only	DHHC palmitoyltransferase	Protein S-acyltransferase 24 GN=F5O24.240 OS=Arabidopsis thaliana (Mouse-ear cress) PE=2 SV=1	S	Function unknown	PREDICTED: S-acyltransferase TIP1-like [Cucumis sativus]
F01_transcript_45962	--	--	--	--	--	--	--	Transcription factor BRX N-terminal domain;; Spc19	--	DZ	--	PREDICTED: uncharacterized protein LOC100246114 [Vitis vinifera]
F01_transcript_84284	--	--	Cellular Component: chloroplast thylakoid (GO:0009534);; Cellular Component: chloroplast stroma (GO:0009570);; Molecular Function: linoleate 13S-lipoxygenase activity (GO:0016165);; Biological Process: oxylipin biosynthetic process (GO:0031408);; Molecular Function: metal ion binding (GO:0046872);; Biological Process: oxidation-reduction process (GO:0055114);;	--	--	--	--	Lipoxygenase;; Lipoxygenase	Linoleate 13S-lipoxygenase 2-1, chloroplastic (Precursor) GN=LOX2.1 OS=Solanum tuberosum (Potato) PE=1 SV=1	S	Function unknown	PREDICTED: linoleate 13S-lipoxygenase 2-1, chloroplastic-like [Nicotiana tomentosiformis]
F01_transcript_104787	[E]	Amino acid transport and metabolism	Molecular Function: argininosuccinate lyase activity (GO:0004056);; Cellular Component: cytosol (GO:0005829);; Cellular Component: chloroplast stroma (GO:0009570);; Biological Process: arginine biosynthetic process via ornithine (GO:0042450);; Biological Process: protein tetramerization (GO:0051262);;	K01755|6.17451e-108|sot:102578683|K01755 argininosuccinate lyase [EC:4.3.2.1] | (RefSeq) argininosuccinate lyase, chloroplastic	ko00220:Arginine biosynthesis;ko00250:Alanine, aspartate and glutamate metabolism;ko01230:Biosynthesis of amino acids	[E]	Amino acid transport and metabolism	Lyase;; Lyase	Argininosuccinate lyase, chloroplastic (Precursor) GN=At5g10920 OS=Arabidopsis thaliana (Mouse-ear cress) PE=1 SV=1	E	Amino acid transport and metabolism	PREDICTED: argininosuccinate lyase, chloroplastic [Nicotiana tomentosiformis]
F01_transcript_101374	--	--	Biological Process: cellulose microfibril organization (GO:0010215);; Cellular Component: integral component of membrane (GO:0016021);; Biological Process: cell growth (GO:0016049);; Cellular Component: anchored component of membrane (GO:0031225);;	--	--	--	--	COBRA-like protein	Protein COBRA (Precursor) GN=COB OS=Arabidopsis thaliana (Mouse-ear cress) PE=2 SV=1	S	Function unknown	Protein COBRA -like protein [Gossypium arboreum]
F01_transcript_119321	[G]	Carbohydrate transport and metabolism	--	--	--	[GC]	--	UDP-glucoronosyl and UDP-glucosyl transferase;; Glycosyltransferase family 28 C-terminal domain	UDP-glycosyltransferase 78D3 GN=UGT78D3 OS=Arabidopsis thaliana (Mouse-ear cress) PE=2 SV=1	S	Function unknown	hypothetical protein RirG_120160 [Rhizophagus irregularis DAOM 197198w]
F01_transcript_130274	[G]	Carbohydrate transport and metabolism	Biological Process: glucose metabolic process (GO:0006006);; Molecular Function: oxidoreductase activity, acting on the aldehyde or oxo group of donors, NAD or NADP as acceptor (GO:0016620);; Molecular Function: NADP binding (GO:0050661);; Molecular Function: NAD binding (GO:0051287);; Biological Process: oxidation-reduction process (GO:0055114);;	K00134|0|pmum:103321966|K00134 glyceraldehyde 3-phosphate dehydrogenase [EC:1.2.1.12] | (RefSeq) glyceraldehyde-3-phosphate dehydrogenase, cytosolic	ko00010:Glycolysis / Gluconeogenesis;ko00710:Carbon fixation in photosynthetic organisms;ko01200:Carbon metabolism;ko01230:Biosynthesis of amino acids	[G]	Carbohydrate transport and metabolism	Glyceraldehyde 3-phosphate dehydrogenase, C-terminal domain;; Glyceraldehyde 3-phosphate dehydrogenase, NAD binding domain	Glyceraldehyde-3-phosphate dehydrogenase, cytosolic GN=GAPC OS=Sinapis alba (White mustard) PE=2 SV=2	G	Carbohydrate transport and metabolism	glyceraldehyde-3-phosphate dehydrogenase [Eleutherococcus senticosus]
F01_transcript_68684	[H]	Coenzyme transport and metabolism	Cellular Component: mitochondrial inner membrane (GO:0005743);; Molecular Function: alternative oxidase activity (GO:0009916);; Cellular Component: integral component of membrane (GO:0016021);; Molecular Function: metal ion binding (GO:0046872);; Biological Process: oxidation-reduction process (GO:0055114);; Cellular Component: respiratory chain (GO:0070469);;	K17893|2.9246e-112|fve:101301585|K17893 ubiquinol oxidase [EC:1.10.3.11] | (RefSeq) ubiquinol oxidase, mitochondrial-like	--	--	--	Alternative oxidase	Ubiquinol oxidase 2, mitochondrial (Precursor) GN=AOX2 OS=Glycine max (Soybean) PE=1 SV=2	S	Function unknown	mitochondrial alternative oxidase 2a [Daucus carota]
F01_transcript_144363	--	--	Cellular Component: endosome (GO:0005768);; Biological Process: intracellular protein transport (GO:0006886);; Molecular Function: protein transporter activity (GO:0008565);;	--	--	[R]	General function prediction only	Arrestin (or S-antigen), N-terminal domain;; Vacuolar protein sorting-associated protein 26	--	S	Function unknown	hypothetical protein PHAVU_004G149400g [Phaseolus vulgaris]
F01_transcript_98383	[J]	Translation, ribosomal structure and biogenesis	Molecular Function: RNA polymerase II transcription factor activity, sequence-specific DNA binding (GO:0000981);; Biological Process: cytoplasmic translation (GO:0002181);; Molecular Function: DNA binding (GO:0003677);; Molecular Function: structural constituent of ribosome (GO:0003735);; Cellular Component: nucleus (GO:0005634);; Biological Process: regulation of transcription from RNA polymeras…	K02898|7.57873e-46|pvu:PHAVU_006G190800g|K02898 large subunit ribosomal protein L26e | (RefSeq) hypothetical protein	ko03010:Ribosome	[J]	Translation, ribosomal structure and biogenesis	Ribosomal proteins L26 eukaryotic, L24P archaeal;; KOW motif	60S ribosomal protein L26-2 GN=RPL26B OS=Arabidopsis thaliana (Mouse-ear cress) PE=2 SV=1	J	Translation, ribosomal structure and biogenesis	Translation proteins SH3-like protein [Glarea lozoyensis ATCC 20868]
F01_transcript_9027	[J]	Translation, ribosomal structure and biogenesis	Molecular Function: amidase activity (GO:0004040);; Molecular Function: D-lactate dehydrogenase (cytochrome) activity (GO:0004458);; Cellular Component: vacuolar membrane (GO:0005774);; Cellular Component: endoplasmic reticulum (GO:0005783);; Cellular Component: Golgi apparatus (GO:0005794);; Cellular Component: plasma membrane (GO:0005886);; Cellular Component: integral component of membrane (GO…	--	--	[J]	Translation, ribosomal structure and biogenesis	Amidase	Fatty acid amide hydrolase GN=FAAH OS=Arabidopsis thaliana (Mouse-ear cress) PE=1 SV=1	J	Translation, ribosomal structure and biogenesis	PREDICTED: fatty acid amide hydrolase [Sesamum indicum]
F01_transcript_95971	[O]	Posttranslational modification, protein turnover, chaperones	Molecular Function: ATP binding (GO:0005524);; Cellular Component: nucleus (GO:0005634);; Molecular Function: microtubule-severing ATPase activity (GO:0008568);; Cellular Component: integral component of membrane (GO:0016021);; Biological Process: cytoplasmic microtubule organization (GO:0031122);;	--	--	[O]	Posttranslational modification, protein turnover, chaperones	ATPase family associated with various cellular activities (AAA)	Protein SUPPRESSOR OF K(+) TRANSPORT GROWTH DEFECT 1 {ECO:0000303|PubMed:17468262} OS=Arabidopsis thaliana (Mouse-ear cress) PE=1 SV=1	O	Posttranslational modification, protein turnover, chaperones	unknown [Picea sitchensis]
F01_transcript_93551	--	--	Molecular Function: protein serine/threonine phosphatase activity (GO:0004722);; Cellular Component: plasma membrane (GO:0005886);; Biological Process: protein dephosphorylation (GO:0006470);; Cellular Component: integral component of membrane (GO:0016021);; Molecular Function: metal ion binding (GO:0046872);;	K01102|1.35392e-155|tcc:TCM_043030|K01102 pyruvate dehydrogenase phosphatase [EC:3.1.3.43] | (RefSeq) Phosphatase 2C family protein isoform 1	--	[T]	Signal transduction mechanisms	Protein phosphatase 2C	Probable protein phosphatase 2C 38 GN=At3g12620 OS=Arabidopsis thaliana (Mouse-ear cress) PE=2 SV=1	T	Signal transduction mechanisms	Phosphatase 2C family protein isoform 2 [Theobroma cacao]
F01_transcript_138228	[T]	Signal transduction mechanisms	Molecular Function: protein serine/threonine kinase activity (GO:0004674);; Molecular Function: non-membrane spanning protein tyrosine kinase activity (GO:0004715);; Molecular Function: ATP binding (GO:0005524);; Cellular Component: plasma membrane (GO:0005886);; Cellular Component: integral component of membrane (GO:0016021);; Biological Process: peptidyl-tyrosine phosphorylation (GO:0018108);;	--	--	--	--	--	Protein NSP-INTERACTING KINASE 3 (Precursor) GN=NIK3 OS=Arabidopsis thaliana (Mouse-ear cress) PE=1 SV=1	T	Signal transduction mechanisms	putative serine/threonine protein kinase [Ipomoea batatas]
F01_transcript_94656	--	--	Molecular Function: damaged DNA binding (GO:0003684);; Cellular Component: nucleus (GO:0005634);; Biological Process: nucleotide-excision repair (GO:0006289);; Biological Process: proteasome-mediated ubiquitin-dependent protein catabolic process (GO:0043161);;	K10839|3.03609e-16|gmx:100809066|K10839 UV excision repair protein RAD23 | (RefSeq) putative DNA repair protein RAD23-3-like	ko03420:Nucleotide excision repair;ko04141:Protein processing in endoplasmic reticulum	[L]	Replication, recombination and repair	--	Probable ubiquitin receptor RAD23 OS=Oryza sativa subsp. japonica (Rice) PE=1 SV=2	O	Posttranslational modification, protein turnover, chaperones	uncharacterized protein LOC100809066 [Glycine max]
F01_transcript_138180	--	--	Molecular Function: adenosine kinase activity (GO:0004001);; Biological Process: purine ribonucleoside salvage (GO:0006166);; Biological Process: AMP biosynthetic process (GO:0006167);; Biological Process: phosphorylation (GO:0016310);;	K00856|1.71894e-56|cit:102619122|K00856 adenosine kinase [EC:2.7.1.20] | (RefSeq) adenosine kinase 2	ko00230:Purine metabolism	[G]	Carbohydrate transport and metabolism	pfkB family carbohydrate kinase	Adenosine kinase 2 GN=ADK2 OS=Arabidopsis thaliana (Mouse-ear cress) PE=1 SV=1	G	Carbohydrate transport and metabolism	hypothetical protein CISIN_1g019448mg [Citrus sinensis]
F01_transcript_57691	--	--	Molecular Function: nucleotide binding (GO:0000166);;	K10406|4.89628e-57|osa:4331382|K10406 kinesin family member C2/C3 | (RefSeq) kinesin-like protein KIF3B	--	[Z]	Cytoskeleton	Kinesin motor domain	Kinesin KP1 GN=KP1 OS=Arabidopsis thaliana (Mouse-ear cress) PE=1 SV=2	Z	Cytoskeleton	Kinesin-4 [Aegilops tauschii]
F01_transcript_89993	--	--	--	--	--	--	--	Protein of unknown function (DUF688)	--	S	Function unknown	hypothetical protein CICLE_v10002610mg [Citrus clementina]
F01_transcript_35707	[R]	General function prediction only	Cellular Component: cytosol (GO:0005829);; Biological Process: regulation of transcription, DNA-templated (GO:0006355);; Molecular Function: histone-arginine N-methyltransferase activity (GO:0008469);; Biological Process: peptidyl-arginine methylation, to asymmetrical-dimethyl arginine (GO:0019919);; Biological Process: histone arginine methylation (GO:0034969);; Molecular Function: protein-argin…	K11434|3.1837e-28|tcc:TCM_037701|K11434 type I protein arginine methyltransferase [EC:2.1.1.319] | (RefSeq) Arginine methyltransferase 11	--	[OKT]	--	--	Probable protein arginine N-methyltransferase 1 OS=Oryza sativa subsp. japonica (Rice) PE=2 SV=1	S	Function unknown	Arginine methyltransferase 11 [Theobroma cacao]
F01_transcript_138882	--	--	Biological Process: spliceosomal complex assembly (GO:0000245);; Molecular Function: catalytic activity (GO:0003824);; Cellular Component: spliceosomal complex (GO:0005681);; Cellular Component: U5 snRNP (GO:0005682);; Biological Process: mitotic cell cycle (GO:0007067);; Cellular Component: plastid (GO:0009536);; Cellular Component: U4/U6 x U5 tri-snRNP complex (GO:0046540);;	K12859|1.16142e-102|pvu:PHAVU_006G122000g|K12859 U5 snRNP protein, DIM1 family | (RefSeq) hypothetical protein	ko03040:Spliceosome	[AD]	--	Mitosis protein DIM1;; Thioredoxin	Thioredoxin-like protein YLS8 GN=YLS8 OS=Arabidopsis thaliana (Mouse-ear cress) PE=2 SV=1	S	Function unknown	hypothetical protein PHAVU_006G122000g [Phaseolus vulgaris]
F01_transcript_44789	[C]	Energy production and conversion	Molecular Function: NADPH dehydrogenase activity (GO:0003959);; Cellular Component: peroxisome (GO:0005777);; Biological Process: jasmonic acid biosynthetic process (GO:0009695);; Molecular Function: FMN binding (GO:0010181);; Molecular Function: 12-oxophytodienoate reductase activity (GO:0016629);; Biological Process: oxylipin biosynthetic process (GO:0031408);; Biological Process: oxidation-red…	K05894|0|tcc:TCM_037547|K05894 12-oxophytodienoic acid reductase [EC:1.3.1.42] | (RefSeq) 12-oxophytodienoate reductase 3	ko00592:alpha-Linolenic acid metabolism	[CR]	--	NADH:flavin oxidoreductase / NADH oxidase family	12-oxophytodienoate reductase 3 GN=OPR3 OS=Solanum lycopersicum (Tomato) PE=1 SV=1	C	Energy production and conversion	12-oxophytodienoate reductase 3 [Theobroma cacao]
F01_transcript_66741	[R]	General function prediction only	Molecular Function: catalytic activity (GO:0003824);; Biological Process: metabolic process (GO:0008152);;	--	--	[EH]	--	Phosphoadenosine phosphosulfate reductase family;; Probable molybdopterin binding domain	--	P	Inorganic ion transport and metabolism	PREDICTED: FAD synthase [Vitis vinifera]
F01_transcript_9323	--	--	Cellular Component: integral component of membrane (GO:0016021);;	--	--	[S]	Function unknown	Sad1 / UNC-like C-terminal	--	S	Function unknown	PREDICTED: uncharacterized protein slp1 [Vitis vinifera]
F01_transcript_117057	--	--	--	--	--	--	--	Phytosulfokine precursor protein (PSK)	--	--	--	--
F01_transcript_114584	--	--	Cellular Component: endosome (GO:0005768);; Cellular Component: trans-Golgi network (GO:0005802);; Cellular Component: integral component of membrane (GO:0016021);; Molecular Function: transferase activity (GO:0016740);;	--	--	--	--	--	--	S	Function unknown	PREDICTED: uncharacterized protein LOC104216249 [Nicotiana sylvestris]
F01_transcript_2072	[L]	Replication, recombination and repair	Molecular Function: ubiquitin-protein transferase activity (GO:0004842);; Biological Process: protein ubiquitination (GO:0016567);; Molecular Function: ligase activity (GO:0016874);;	--	--	[S]	Function unknown	U-box domain;; Armadillo/beta-catenin-like repeat;; Kinesin-associated protein (KAP)	U-box domain-containing protein 6 GN=PUB6 OS=Arabidopsis thaliana (Mouse-ear cress) PE=2 SV=2	O	Posttranslational modification, protein turnover, chaperones	unnamed protein product [Coffea canephora]
F01_transcript_11372	[T]	Signal transduction mechanisms	Molecular Function: protein serine/threonine kinase activity (GO:0004674);; Molecular Function: ATP binding (GO:0005524);; Cellular Component: nucleus (GO:0005634);; Cellular Component: cytosol (GO:0005829);; Biological Process: sucrose metabolic process (GO:0005985);; Biological Process: unsaturated fatty acid biosynthetic process (GO:0006636);; Biological Process: response to water deprivation …	K14498|0|tcc:TCM_006995|K14498 serine/threonine-protein kinase SRK2 [EC:2.7.11.1] | (RefSeq) Kinase superfamily protein isoform 1	ko04075:Plant hormone signal transduction	[T]	Signal transduction mechanisms	Protein kinase domain;; Protein tyrosine kinase	Serine/threonine-protein kinase SRK2E GN=F17I5.140 OS=Arabidopsis thaliana (Mouse-ear cress) PE=1 SV=1	T	Signal transduction mechanisms	PREDICTED: serine/threonine-protein kinase SRK2E-like [Nicotiana sylvestris]
F01_transcript_27302	[G]	Carbohydrate transport and metabolism	Molecular Function: glyceraldehyde-3-phosphate dehydrogenase (NAD+) (phosphorylating) activity (GO:0004365);; Cellular Component: cytoplasm (GO:0005737);; Biological Process: glucose metabolic process (GO:0006006);; Biological Process: glycolytic process (GO:0006096);; Cellular Component: integral component of membrane (GO:0016021);; Molecular Function: NADP binding (GO:0050661);; Molecular Funct…	K00134|4.99578e-19|pvu:PHAVU_009G1685000|K00134 glyceraldehyde 3-phosphate dehydrogenase [EC:1.2.1.12] | (RefSeq) hypothetical protein	ko00010:Glycolysis / Gluconeogenesis;ko00710:Carbon fixation in photosynthetic organisms;ko01200:Carbon metabolism;ko01230:Biosynthesis of amino acids	[G]	Carbohydrate transport and metabolism	--	Glyceraldehyde-3-phosphate dehydrogenase 2, cytosolic OS=Oryza sativa subsp. japonica (Rice) PE=1 SV=1	G	Carbohydrate transport and metabolism	hypothetical protein [Zea mays]
F01_transcript_101781	--	--	Cellular Component: membrane (GO:0016020);;	--	--	--	--	--	--	S	Function unknown	hypothetical protein CICLE_v10032119mg [Citrus clementina]
F01_transcript_115966	--	--	Molecular Function: zinc ion binding (GO:0008270);; Cellular Component: integral component of membrane (GO:0016021);; Molecular Function: ligase activity (GO:0016874);;	--	--	[A]	RNA processing and modification	RING-variant domain	Probable E3 ubiquitin ligase SUD1 GN=F28A23.140 OS=Arabidopsis thaliana (Mouse-ear cress) PE=1 SV=1	O	Posttranslational modification, protein turnover, chaperones	PREDICTED: uncharacterized protein LOC100259554 [Vitis vinifera]
F01_transcript_56353	[J]	Translation, ribosomal structure and biogenesis	Molecular Function: nucleic acid binding (GO:0003676);; Molecular Function: lysine-tRNA ligase activity (GO:0004824);; Molecular Function: ATP binding (GO:0005524);; Cellular Component: mitochondrion (GO:0005739);; Biological Process: lysyl-tRNA aminoacylation (GO:0006430);; Cellular Component: chloroplast (GO:0009507);; Biological Process: plant ovule development (GO:0048481);;	K04567|0|vvi:100262063|K04567 lysyl-tRNA synthetase, class II [EC:6.1.1.6] | (RefSeq) lysine--tRNA ligase, chloroplastic/mitochondrial	ko00970:Aminoacyl-tRNA biosynthesis	[J]	Translation, ribosomal structure and biogenesis	tRNA synthetases class II (D, K and N);; OB-fold nucleic acid binding domain;; tRNA synthetases class II (D, K and N)	Lysine--tRNA ligase GN=At3g11710 OS=Arabidopsis thaliana (Mouse-ear cress) PE=1 SV=1	J	Translation, ribosomal structure and biogenesis	hypothetical protein VITISV_036995 [Vitis vinifera]
F01_transcript_99363	--	--	Molecular Function: nucleotide binding (GO:0000166);; Molecular Function: microtubule motor activity (GO:0003777);; Cellular Component: kinesin complex (GO:0005871);; Biological Process: microtubule-based movement (GO:0007018);; Molecular Function: ATPase activity (GO:0016887);;	K10393|4.6009e-09|vvi:100240940|K10393 kinesin family member 2/24 | (RefSeq) kinesin-like protein KIN-13A	--	[Z]	Cytoskeleton	--	Kinesin-13A GN=KINESIN-13A OS=Arabidopsis thaliana (Mouse-ear cress) PE=1 SV=1	Z	Cytoskeleton	hypothetical protein MIMGU_mgv1a001950mg [Erythranthe guttata]
F01_transcript_88745	--	--	Cellular Component: nucleus (GO:0005634);; Biological Process: response to blue light (GO:0009637);; Biological Process: ethylene-activated signaling pathway (GO:0009873);; Biological Process: regulation of photomorphogenesis (GO:0010099);; Biological Process: response to red light (GO:0010114);; Biological Process: regulation of circadian rhythm (GO:0042752);;	K13119|2.46145e-147|vvi:100255509|K13119 protein FAM50 | (RefSeq) protein XAP5 CIRCADIAN TIMEKEEPER	--	[S]	Function unknown	--	Protein XAP5 CIRCADIAN TIMEKEEPER OS=Oryza sativa subsp. japonica (Rice) PE=2 SV=1	S	Function unknown	PREDICTED: protein XAP5 CIRCADIAN TIMEKEEPER isoform X1 [Vitis vinifera]
F01_transcript_48116	[EQ]	--	Cellular Component: cytosol (GO:0005829);; Biological Process: glutathione catabolic process (GO:0006751);; Cellular Component: plasmodesma (GO:0009506);; Molecular Function: 5-oxoprolinase (ATP-hydrolyzing) activity (GO:0017168);;	K01469|0|vvi:100252923|K01469 5-oxoprolinase (ATP-hydrolysing) [EC:3.5.2.9] | (RefSeq) 5-oxoprolinase	ko00480:Glutathione metabolism	[E]	Amino acid transport and metabolism	Hydantoinase B/oxoprolinase;; Hydantoinase/oxoprolinase;; Hydantoinase/oxoprolinase N-terminal region;; Hydantoinase/oxoprolinase	5-oxoprolinase GN=OXP1 OS=Arabidopsis thaliana (Mouse-ear cress) PE=2 SV=1	EQ	--	PREDICTED: 5-oxoprolinase [Vitis vinifera]
F01_transcript_37666	--	--	Biological Process: transcription, DNA-templated (GO:0006351);;	--	--	--	--	B3 DNA binding domain	B3 domain-containing protein Os02g0598200 GN=OJ1212_D02.14 OS=Oryza sativa subsp. japonica (Rice) PE=2 SV=1	S	Function unknown	PREDICTED: uncharacterized protein LOC104882266 isoform X2 [Vitis vinifera]
F01_transcript_74188	--	--	--	--	--	--	--	--	--	S	Function unknown	PREDICTED: uncharacterized protein LOC104877505 [Vitis vinifera]
F01_transcript_55622	--	--	--	--	--	[S]	Function unknown	Chromosome segregation during meiosis;; Domain of unknown function (DUF4210)	--	S	Function unknown	PREDICTED: uncharacterized protein LOC100266395 [Vitis vinifera]
F01_transcript_48803	[E]	Amino acid transport and metabolism	Molecular Function: aspartate kinase activity (GO:0004072);; Molecular Function: homoserine dehydrogenase activity (GO:0004412);; Molecular Function: ATP binding (GO:0005524);; Biological Process: methionine biosynthetic process (GO:0009086);; Biological Process: threonine biosynthetic process (GO:0009088);; Biological Process: lysine biosynthetic process via diaminopimelate (GO:0009089);; Cellul…	K12524|0|cit:102628536|K12524 bifunctional aspartokinase / homoserine dehydrogenase 1 [EC:2.7.2.4 1.1.1.3] | (RefSeq) bifunctional aspartokinase/homoserine dehydrogenase 1, chloroplastic-like	ko00260:Glycine, serine and threonine metabolism;ko00261:Monobactam biosynthesis;ko00270:Cysteine and methionine metabolism;ko00300:Lysine biosynthesis;ko01230:Biosynthesis of amino acids	--	--	Amino acid kinase family;; ACT domain;; ACT domain;; Homoserine dehydrogenase, NAD binding domain	Homoserine dehydrogenase (Precursor; Fragment) OS=Daucus carota (Wild carrot) PE=1 SV=1	E	Amino acid transport and metabolism	RecName: Full=Bifunctional aspartokinase/homoserine dehydrogenase, chloroplastic; Short=AK-HD; Short=AK-HSDH; Includes: RecName: Full=Aspartokinase; Includes: RecName: Full=Homoserine dehydrogenase; Flags: Precursor, partial [Daucus carota]
F01_transcript_74450	[I]	Lipid transport and metabolism	Molecular Function: methyltransferase activity (GO:0008168);;	--	--	--	--	SAM dependent carboxyl methyltransferase	Benzoate carboxyl methyltransferase GN=BAMT OS=Antirrhinum majus (Garden snapdragon) PE=1 SV=1	S	Function unknown	PREDICTED: benzoate carboxyl methyltransferase-like [Citrus sinensis]
F01_transcript_121227	[R]	General function prediction only	--	K16365|0|sly:101245907|K16365 small glutamine-rich tetratricopeptide repeat-containing protein alpha | (RefSeq) small glutamine-rich tetratricopeptide repeat-containing protein 2	--	[R]	General function prediction only	Tetratricopeptide repeat;; TPR repeat;; Tetratricopeptide repeat;; Tetratricopeptide repeat;; Homodimerisation domain of SGTA	Serine/threonine-protein phosphatase 5 GN=F7D19.19 OS=Arabidopsis thaliana (Mouse-ear cress) PE=1 SV=1	S	Function unknown	unnamed protein product [Coffea canephora]
F01_transcript_142968	--	--	Cellular Component: mitochondrion (GO:0005739);; Biological Process: mitochondrial mRNA modification (GO:0080156);;	--	--	[R]	General function prediction only	PPR repeat family;; PPR repeat;; PPR repeat;; Pentatricopeptide repeat domain;; Pentacotripeptide-repeat region of PRORP	Pentatricopeptide repeat-containing protein At2g20540 GN=PCMP-E78 OS=Arabidopsis thaliana (Mouse-ear cress) PE=2 SV=1	S	Function unknown	PREDICTED: pentatricopeptide repeat-containing protein At2g20540 [Nicotiana tomentosiformis]
F01_transcript_18325	--	--	--	--	--	--	--	WRC;; QLQ	Growth-regulating factor 4 OS=Oryza sativa subsp. japonica (Rice) PE=2 SV=1	K	Transcription	PREDICTED: growth-regulating factor 4 isoform X2 [Vitis vinifera]
F01_transcript_84598	[U]	Intracellular trafficking, secretion, and vesicular transport	--	--	--	--	--	WD40-like Beta Propeller Repeat;; Dipeptidyl peptidase IV (DPP IV) N-terminal region	--	U	Intracellular trafficking, secretion, and vesicular transport	unnamed protein product [Coffea canephora]
F01_transcript_37472	--	--	Cellular Component: cytoplasm (GO:0005737);; Biological Process: metal ion transport (GO:0030001);; Molecular Function: transition metal ion binding (GO:0046914);; Biological Process: cellular transition metal ion homeostasis (GO:0046916);;	--	--	[P]	Inorganic ion transport and metabolism	Heavy-metal-associated domain	Heavy metal-associated isoprenylated plant protein 26 (Precursor) GN=F20M13.140 OS=Arabidopsis thaliana (Mouse-ear cress) PE=1 SV=1	S	Function unknown	PREDICTED: heavy metal-associated isoprenylated plant protein 26 [Vitis vinifera]
F01_transcript_6295	[O]	Posttranslational modification, protein turnover, chaperones	Molecular Function: protein disulfide isomerase activity (GO:0003756);; Cellular Component: endoplasmic reticulum lumen (GO:0005788);; Biological Process: protein folding (GO:0006457);; Cellular Component: integral component of membrane (GO:0016021);; Biological Process: response to endoplasmic reticulum stress (GO:0034976);; Biological Process: cell redox homeostasis (GO:0045454);;	K09580|8.9558e-179|vvi:100259138|K09580 protein disulfide-isomerase A1 [EC:5.3.4.1] | (RefSeq) protein disulfide-isomerase	ko04141:Protein processing in endoplasmic reticulum	[O]	Posttranslational modification, protein turnover, chaperones	Thioredoxin;; Thioredoxin-like domain;; Thioredoxin-like domain;; OST3 / OST6 family, transporter family;; ERp29, N-terminal domain	Protein disulfide-isomerase (Precursor) GN=PDI OS=Datisca glomerata (Durango root) PE=2 SV=1	O	Posttranslational modification, protein turnover, chaperones	protein disulfide isomerase 1 [Daucus carota]
F01_transcript_101401	--	--	Cellular Component: 1,3-beta-D-glucan synthase complex (GO:0000148);; Molecular Function: 1,3-beta-D-glucan synthase activity (GO:0003843);; Biological Process: (1->3)-beta-D-glucan biosynthetic process (GO:0006075);; Cellular Component: integral component of membrane (GO:0016021);;	K11000|1.9027e-36|cit:102624514|K11000 callose synthase [EC:2.4.1.-] | (RefSeq) callose synthase 2	--	[M]	Cell wall/membrane/envelope biogenesis	--	Callose synthase 2 GN=F22D22.29 OS=Arabidopsis thaliana (Mouse-ear cress) PE=2 SV=3	S	Function unknown	PREDICTED: callose synthase 1 [Sesamum indicum]
F01_transcript_51351	--	--	--	--	--	[R]	General function prediction only	PPR repeat family;; PPR repeat;; PPR repeat;; Pentatricopeptide repeat domain;; Pentacotripeptide-repeat region of PRORP;; DYW family of nucleic acid deaminases	Pentatricopeptide repeat-containing protein At2g27610 OS=Arabidopsis thaliana (Mouse-ear cress) PE=2 SV=1	S	Function unknown	hypothetical protein VITISV_006763 [Vitis vinifera]
F01_transcript_4647	[V]	Defense mechanisms	Cellular Component: nuclear heterochromatin (GO:0005720);; Molecular Function: zinc ion binding (GO:0008270);; Biological Process: maintenance of DNA methylation (GO:0010216);; Biological Process: protein ubiquitination (GO:0016567);; Molecular Function: histone binding (GO:0042393);; Molecular Function: ubiquitin protein ligase activity (GO:0061630);; Biological Process: regulation of methylatio…	K10638|0|fve:101309358|K10638 E3 ubiquitin-protein ligase UHRF1 [EC:2.3.2.27] | (RefSeq) E3 ubiquitin-protein ligase ORTHRUS 2-like	--	--	--	SAD/SRA domain;; RING-type zinc-finger;; Zinc finger, C3HC4 type (RING finger);; Zinc finger, C3HC4 type (RING finger);; Zinc finger, C3HC4 type (RING finger);; Ring finger domain	E3 ubiquitin-protein ligase ORTHRUS 2 GN=F12K22.14 OS=Arabidopsis thaliana (Mouse-ear cress) PE=1 SV=1	V	Defense mechanisms	PREDICTED: E3 ubiquitin-protein ligase ORTHRUS 2-like [Nelumbo nucifera]
F01_transcript_128183	--	--	Molecular Function: binding (GO:0005488);; Cellular Component: membrane (GO:0016020);; Biological Process: small molecule metabolic process (GO:0044281);; Biological Process: single-organism biosynthetic process (GO:0044711);; Biological Process: single-organism cellular process (GO:0044763);; Biological Process: pyridine-containing compound biosynthetic process (GO:0072525);;	K13114|7.79604e-27|tcc:TCM_006427|K13114 pinin | (RefSeq) protein interaction regulator family protein isoform 1	ko03013:RNA transport;ko03015:mRNA surveillance pathway	--	--	Ribosomal large subunit proteins 60S L5, and 50S L18;; Quinolinate synthetase A protein	Quinolinate synthase, chloroplastic (Precursor) GN=K6A12.7 OS=Arabidopsis thaliana (Mouse-ear cress) PE=1 SV=1	S	Function unknown	PREDICTED: quinolinate synthase, chloroplastic [Nicotiana sylvestris]
F01_transcript_99015	[T]	Signal transduction mechanisms	Biological Process: transcription, DNA-templated (GO:0006351);; Biological Process: signal transduction (GO:0007165);; Cellular Component: membrane (GO:0016020);;	--	--	[K]	Transcription	Response regulator receiver domain;; Myb-like DNA-binding domain	Two-component response regulator ARR12 GN=ARR12 OS=Arabidopsis thaliana (Mouse-ear cress) PE=2 SV=2	K	Transcription	two-component system sensor histidine kinase/response regulator, putative [Ricinus communis]
F01_transcript_142249	[T]	Signal transduction mechanisms	Biological Process: activation of MAPKK activity (GO:0000186);; Molecular Function: MAP kinase kinase kinase activity (GO:0004709);; Molecular Function: ATP binding (GO:0005524);; Cellular Component: intracellular (GO:0005622);;	K04733|0|vvi:100853083|K04733 interleukin-1 receptor-associated kinase 4 [EC:2.7.11.1] | (RefSeq) probable receptor-like protein kinase At5g15080	--	[T]	Signal transduction mechanisms	Protein tyrosine kinase;; Protein kinase domain	Probable receptor-like protein kinase At5g15080 GN=At5g15080 OS=Arabidopsis thaliana (Mouse-ear cress) PE=2 SV=1	T	Signal transduction mechanisms	PREDICTED: probable receptor-like protein kinase At5g15080 [Vitis vinifera]
F01_transcript_132690	--	--	Molecular Function: magnesium ion transmembrane transporter activity (GO:0015095);; Biological Process: magnesium ion transport (GO:0015693);; Cellular Component: integral component of membrane (GO:0016021);; Biological Process: magnesium ion transmembrane transport (GO:1903830);;	--	--	[S]	Function unknown	Magnesium transporter NIPA	Probable magnesium transporter NIPA6 GN=At2g21120 OS=Arabidopsis thaliana (Mouse-ear cress) PE=2 SV=1	S	Function unknown	unnamed protein product [Coffea canephora]
F01_transcript_116137	--	--	--	--	--	--	--	--	--	--	--	hypothetical protein Csa_6G149380 [Cucumis sativus]
F01_transcript_85540	--	--	Molecular Function: catalytic activity (GO:0003824);; Biological Process: carbohydrate metabolic process (GO:0005975);; Molecular Function: carbohydrate binding (GO:0030246);;	K18195|0|sot:102595358|K18195 rhamnogalacturonan endolyase [EC:4.2.2.23] | (RefSeq) rhamnogalacturonate lyase-like	--	--	--	Rhamnogalacturonate lyase family;; Rhamnogalacturonate lyase family	--	S	Function unknown	unnamed protein product [Coffea canephora]
F01_transcript_11529	--	--	Cellular Component: cytosol (GO:0005829);; Biological Process: retrograde vesicle-mediated transport, Golgi to ER (GO:0006890);; Cellular Component: plasmodesma (GO:0009506);; Biological Process: protein transport (GO:0015031);; Cellular Component: COPI vesicle coat (GO:0030126);;	K20471|0|cit:102614683|K20471 coatomer subunit delta | (RefSeq) coatomer subunit delta	--	[U]	Intracellular trafficking, secretion, and vesicular transport	Adaptor complexes medium subunit family	Coatomer subunit delta GN=At5g05010 OS=Arabidopsis thaliana (Mouse-ear cress) PE=1 SV=2	U	Intracellular trafficking, secretion, and vesicular transport	unnamed protein product [Vitis vinifera]
F01_transcript_19345	--	--	Molecular Function: protein serine/threonine/tyrosine kinase activity (GO:0004712);; Biological Process: protein phosphorylation (GO:0006468);; Biological Process: protein transport (GO:0015031);; Cellular Component: integral component of membrane (GO:0016021);;	K19995|2.22232e-143|cit:102621153|K19995 secretory carrier-associated membrane protein | (RefSeq) secretory carrier-associated membrane protein 3	--	[U]	Intracellular trafficking, secretion, and vesicular transport	SCAMP family	Secretory carrier-associated membrane protein 2 OS=Oryza sativa subsp. japonica (Rice) PE=2 SV=1	U	Intracellular trafficking, secretion, and vesicular transport	PREDICTED: putative secretory carrier-associated membrane protein 1-like isoform X1 [Citrus sinensis]
F01_transcript_112245	[G]	Carbohydrate transport and metabolism	--	--	--	[I]	Lipid transport and metabolism	Domain of unknown function (DUF4216)	Phospholipase D beta 1 GN=PLDBETA1 OS=Arabidopsis thaliana (Mouse-ear cress) PE=2 SV=4	S	Function unknown	PREDICTED: uncharacterized protein LOC102598429 [Solanum tuberosum]
F01_transcript_88623	--	--	Molecular Function: beta-galactosidase activity (GO:0004565);; Cellular Component: cell wall (GO:0005618);; Cellular Component: vacuole (GO:0005773);; Biological Process: metabolic process (GO:0008152);; Cellular Component: membrane (GO:0016020);;	--	--	[G]	Carbohydrate transport and metabolism	Galactose binding lectin domain	Beta-galactosidase 9 (Precursor) GN=BGAL9 OS=Arabidopsis thaliana (Mouse-ear cress) PE=2 SV=1	G	Carbohydrate transport and metabolism	beta-galactosidase [Camellia sinensis]
F01_transcript_75841	[T]	Signal transduction mechanisms	Molecular Function: protein serine/threonine kinase activity (GO:0004674);; Molecular Function: ATP binding (GO:0005524);; Biological Process: protein phosphorylation (GO:0006468);;	K02208|0|sot:102591634|K02208 cyclin-dependent kinase 8/11 [EC:2.7.11.22 2.7.11.23] | (RefSeq) cyclin-dependent kinase E-1	--	[K]	Transcription	Protein kinase domain;; Protein tyrosine kinase	Cyclin-dependent kinase E-1 GN=MBK5.8 OS=Arabidopsis thaliana (Mouse-ear cress) PE=1 SV=2	T	Signal transduction mechanisms	PREDICTED: cyclin-dependent kinase E-1-like isoform X1 [Solanum tuberosum]
F01_transcript_45410	[K]	Transcription	Molecular Function: protein serine/threonine kinase activity (GO:0004674);; Molecular Function: transmembrane receptor protein tyrosine kinase activity (GO:0004714);; Molecular Function: ATP binding (GO:0005524);; Cellular Component: integral component of membrane (GO:0016021);; Biological Process: peptidyl-tyrosine phosphorylation (GO:0018108);; Biological Process: cellulose biosynthetic process…	--	--	--	--	Leucine rich repeat N-terminal domain;; Leucine Rich repeats (2 copies);; Leucine rich repeat;; Leucine Rich Repeat	LRR receptor-like serine/threonine-protein kinase FEI 1 (Precursor) GN=FEI1 OS=Arabidopsis thaliana (Mouse-ear cress) PE=1 SV=1	T	Signal transduction mechanisms	hypothetical protein MIMGU_mgv1a003320mg [Erythranthe guttata]
F01_transcript_2544	[M]	Cell wall/membrane/envelope biogenesis	Molecular Function: protein kinase activity (GO:0004672);; Molecular Function: ATP binding (GO:0005524);; Biological Process: protein phosphorylation (GO:0006468);; Cellular Component: integral component of membrane (GO:0016021);;	--	--	--	--	Protein tyrosine kinase;; Protein kinase domain;; Leucine rich repeat	Protein STRUBBELIG-RECEPTOR FAMILY 3 (Precursor) GN=SRF3 OS=Arabidopsis thaliana (Mouse-ear cress) PE=2 SV=1	T	Signal transduction mechanisms	unnamed protein product [Coffea canephora]
F01_transcript_129272	[IQ]	--	Cellular Component: nucleus (GO:0005634);; Cellular Component: cytosol (GO:0005829);; Cellular Component: membrane (GO:0016020);; Molecular Function: malonyl-CoA synthetase activity (GO:0090409);; Biological Process: malonate catabolic process (GO:0090410);;	K18660|3.10215e-142|mdm:103405442|K18660 malonyl-CoA/methylmalonyl-CoA synthetase [EC:6.2.1.-] | (RefSeq) malonate--CoA ligase	ko00280:Valine, leucine and isoleucine degradation	[I]	Lipid transport and metabolism	AMP-binding enzyme;; AMP-binding enzyme C-terminal domain	Malonate--CoA ligase GN=AAE13 OS=Arabidopsis thaliana (Mouse-ear cress) PE=1 SV=1	IQ	--	PREDICTED: malonate--CoA ligase-like isoform X3 [Nicotiana tomentosiformis]
F01_transcript_74644	--	--	Cellular Component: integral component of membrane (GO:0016021);;	K10532|8.43447e-16|cit:102629734|K10532 heparan-alpha-glucosaminide N-acetyltransferase [EC:2.3.1.78] | (RefSeq) heparan-alpha-glucosaminide N-acetyltransferase-like	ko00531:Glycosaminoglycan degradation	[S]	Function unknown	--	Aminopeptidase M1 GN=APM1 OS=Arabidopsis thaliana (Mouse-ear cress) PE=1 SV=1	S	Function unknown	hypothetical protein CISIN_1g0107912mg, partial [Citrus sinensis]
F01_transcript_102357	--	--	Molecular Function: protein phosphatase inhibitor activity (GO:0004864);; Molecular Function: receptor activity (GO:0004872);; Cellular Component: nucleus (GO:0005634);; Cellular Component: cytoplasm (GO:0005737);; Biological Process: abscisic acid-activated signaling pathway (GO:0009738);; Molecular Function: abscisic acid binding (GO:0010427);; Biological Process: negative regulation of catalyt…	K14496|1.88952e-94|pop:POPTR_0016s13320g|K14496 abscisic acid receptor PYR/PYL family | (RefSeq) POPTRDRAFT_907261; hypothetical protein	ko04075:Plant hormone signal transduction	--	--	Polyketide cyclase / dehydrase and lipid transport;; Pathogenesis-related protein Bet v I family;; Polyketide cyclase / dehydrase and lipid transport	Abscisic acid receptor PYL4 GN=T19C21.20 OS=Arabidopsis thaliana (Mouse-ear cress) PE=1 SV=1	S	Function unknown	hypothetical protein JCGZ_00422 [Jatropha curcas]
F01_transcript_65583	--	--	Molecular Function: phosphoprotein phosphatase activity (GO:0004721);; Biological Process: protein dephosphorylation (GO:0006470);; Biological Process: brassinosteroid mediated signaling pathway (GO:0009742);;	--	--	[R]	General function prediction only	--	Serine/threonine-protein phosphatase BSL2 GN=BSL2 OS=Arabidopsis thaliana (Mouse-ear cress) PE=1 SV=2	T	Signal transduction mechanisms	Serine/threonine-protein phosphatase BSL3 -like protein [Gossypium arboreum]
F01_transcript_35683	--	--	Biological Process: regulation of transcription, DNA-templated (GO:0006355);; Molecular Function: zinc ion binding (GO:0008270);;	--	--	--	--	MULE transposase domain;; SWIM zinc finger	Protein FAR1-RELATED SEQUENCE 11 GN=FRS11 OS=Arabidopsis thaliana (Mouse-ear cress) PE=2 SV=1	S	Function unknown	PREDICTED: protein FAR1-RELATED SEQUENCE 11-like [Vitis vinifera]
F01_transcript_116163	--	--	Molecular Function: glycerol-3-phosphate O-acyltransferase activity (GO:0004366);; Cellular Component: endoplasmic reticulum (GO:0005783);; Biological Process: cutin biosynthetic process (GO:0010143);; Cellular Component: integral component of membrane (GO:0016021);; Biological Process: CDP-diacylglycerol biosynthetic process (GO:0016024);; Biological Process: dephosphorylation (GO:0016311);; Mol…	K13508|9.55068e-91|gmx:100794137|K13508 glycerol-3-phosphate acyltransferase [EC:2.3.1.15] | (RefSeq) probable glycerol-3-phosphate acyltransferase 8	ko00561:Glycerolipid metabolism;ko00564:Glycerophospholipid metabolism	--	--	Acyltransferase	Probable glycerol-3-phosphate acyltransferase 8 GN=F5I10.4/F5I10.5 OS=Arabidopsis thaliana (Mouse-ear cress) PE=2 SV=1	I	Lipid transport and metabolism	PREDICTED: probable glycerol-3-phosphate acyltransferase 8 [Eucalyptus grandis]
F01_transcript_56613	[C]	Energy production and conversion	Biological Process: metabolic process (GO:0008152);; Molecular Function: transferase activity, transferring acyl groups (GO:0016746);;	K00627|2.75712e-158|csv:101205566|K00627 pyruvate dehydrogenase E2 component (dihydrolipoamide acetyltransferase) [EC:2.3.1.12] | (RefSeq) dihydrolipoyllysine-residue acetyltransferase component 1 of pyruvate dehydrogenase complex, mitochondrial	ko00010:Glycolysis / Gluconeogenesis;ko00020:Citrate cycle (TCA cycle);ko00620:Pyruvate metabolism;ko01200:Carbon metabolism	[C]	Energy production and conversion	2-oxoacid dehydrogenases acyltransferase (catalytic domain);; Biotin-requiring enzyme;; e3 binding domain;; Biotin-requiring enzyme	Dihydrolipoyllysine-residue acetyltransferase component 1 of pyruvate dehydrogenase complex, mitochondrial (Precursor) GN=LTA3 OS=Arabidopsis thaliana (Mouse-ear cress) PE=2 SV=2	C	Energy production and conversion	PREDICTED: dihydrolipoyllysine-residue acetyltransferase component 1 of pyruvate dehydrogenase complex, mitochondrial-like [Cucumis sativus]
F01_transcript_1890	--	--	Molecular Function: GTPase activator activity (GO:0005096);; Cellular Component: intracellular (GO:0005622);; Biological Process: intracellular protein transport (GO:0006886);; Cellular Component: endomembrane system (GO:0012505);; Molecular Function: Rab GTPase binding (GO:0017137);; Biological Process: regulation of vesicle fusion (GO:0031338);; Biological Process: activation of GTPase activity…	--	--	[U]	Intracellular trafficking, secretion, and vesicular transport	Rab-GTPase-TBC domain	--	S	Function unknown	PREDICTED: TBC1 domain family member 8B [Prunus mume]
F01_transcript_55976	[E]	Amino acid transport and metabolism	Molecular Function: glycine hydroxymethyltransferase activity (GO:0004372);; Cellular Component: cytosol (GO:0005829);; Cellular Component: plasma membrane (GO:0005886);; Biological Process: glycine metabolic process (GO:0006544);; Biological Process: L-serine metabolic process (GO:0006563);; Molecular Function: methyltransferase activity (GO:0008168);; Cellular Component: plasmodesma (GO:0009506…	K00600|0|pxb:103941449|K00600 glycine hydroxymethyltransferase [EC:2.1.2.1] | (RefSeq) serine hydroxymethyltransferase 4-like	ko00260:Glycine, serine and threonine metabolism;ko00460:Cyanoamino acid metabolism;ko00630:Glyoxylate and dicarboxylate metabolism;ko00670:One carbon pool by folate;ko01200:Carbon metabolism;ko01230:Biosynthesis of amino acids	[E]	Amino acid transport and metabolism	Serine hydroxymethyltransferase	Serine hydroxymethyltransferase 4 OS=Arabidopsis thaliana (Mouse-ear cress) PE=1 SV=1	E	Amino acid transport and metabolism	PREDICTED: serine hydroxymethyltransferase 4 [Sesamum indicum]
F01_transcript_50762	--	--	Cellular Component: mitochondrion (GO:0005739);;	--	--	[R]	General function prediction only	PPR repeat family;; PPR repeat;; Pentatricopeptide repeat domain;; PPR repeat;; Pentacotripeptide-repeat region of PRORP	Pentatricopeptide repeat-containing protein At5g61370, mitochondrial (Precursor) GN=At5g61370 OS=Arabidopsis thaliana (Mouse-ear cress) PE=2 SV=1	S	Function unknown	PREDICTED: pentatricopeptide repeat-containing protein At5g61370, mitochondrial [Vitis vinifera]
F01_transcript_68827	--	--	--	--	--	--	--	--	--	BK	--	hypothetical protein PRUPE_ppa003707mg [Prunus persica]
F01_transcript_108815	[M]	Cell wall/membrane/envelope biogenesis	--	--	--	[R]	General function prediction only	Galactose oxidase, central domain;; Galactose oxidase, central domain;; Kelch motif;; Kelch motif;; Kelch motif;; Kelch motif;; F-box-like	F-box/kelch-repeat protein At1g51550 GN=At1g51550 OS=Arabidopsis thaliana (Mouse-ear cress) PE=2 SV=1	S	Function unknown	PREDICTED: F-box/kelch-repeat protein At1g51550 [Nicotiana tomentosiformis]
F01_transcript_134665	--	--	Cellular Component: mitochondrial respiratory chain complex III (GO:0005750);; Biological Process: mitochondrial electron transport, ubiquinol to cytochrome c (GO:0006122);; Molecular Function: ubiquinol-cytochrome-c reductase activity (GO:0008121);; Biological Process: aerobic respiration (GO:0009060);; Biological Process: mitochondrial respiratory chain complex III assembly (GO:0034551);; Biolo…	K00417|1.46109e-13|sly:101262441|K00417 ubiquinol-cytochrome c reductase subunit 7 | (RefSeq) cytochrome b-c1 complex subunit 7	ko00190:Oxidative phosphorylation	[C]	Energy production and conversion	--	Cytochrome b-c1 complex subunit 7 OS=Solanum tuberosum (Potato) PE=1 SV=1	C	Energy production and conversion	hypothetical protein CISIN_1g033311mg [Citrus sinensis]
F01_transcript_93352	[HC]	--	Molecular Function: monooxygenase activity (GO:0004497);; Cellular Component: membrane (GO:0016020);; Biological Process: secondary metabolite biosynthetic process (GO:0044550);;	--	--	[CR]	--	FAD binding domain;; FAD dependent oxidoreductase;; NAD(P)-binding Rossmann-like domain;; Pyridine nucleotide-disulphide oxidoreductase;; FAD binding domain	Zeaxanthin epoxidase, chloroplastic (Precursor) GN=ZEP OS=Oncidium hybrid cultivar (Orchid) PE=2 SV=1	S	Function unknown	PREDICTED: kynurenine 3-monooxygenase-like isoform X1 [Beta vulgaris subsp. vulgaris]
F01_transcript_27624	--	--	Cellular Component: integral component of membrane (GO:0016021);;	--	--	--	--	--	--	S	Function unknown	hypothetical protein MIMGU_mgv1a017153mg [Erythranthe guttata]
F01_transcript_70653	[C]	Energy production and conversion	Molecular Function: oxoglutarate dehydrogenase (succinyl-transferring) activity (GO:0004591);; Cellular Component: mitochondrion (GO:0005739);; Cellular Component: cytosol (GO:0005829);; Biological Process: tricarboxylic acid cycle (GO:0006099);; Molecular Function: thiamine pyrophosphate binding (GO:0030976);; Cellular Component: oxoglutarate dehydrogenase complex (GO:0045252);;	K00164|8.80799e-167|sot:102591883|K00164 2-oxoglutarate dehydrogenase E1 component [EC:1.2.4.2] | (RefSeq) 2-oxoglutarate dehydrogenase, mitochondrial-like	ko00020:Citrate cycle (TCA cycle);ko00310:Lysine degradation;ko00380:Tryptophan metabolism;ko01200:Carbon metabolism	[G]	Carbohydrate transport and metabolism	Transketolase, pyrimidine binding domain;; 2-oxoglutarate dehydrogenase C-terminal;; 2-oxoglutarate dehydrogenase C-terminal	--	C	Energy production and conversion	PREDICTED: 2-oxoglutarate dehydrogenase, mitochondrial-like [Sesamum indicum]
F01_transcript_74178	[T]	Signal transduction mechanisms	Molecular Function: protein serine/threonine kinase activity (GO:0004674);; Molecular Function: ATP binding (GO:0005524);; Cellular Component: cytosol (GO:0005829);; Biological Process: protein autophosphorylation (GO:0046777);;	K03083|0|tcc:TCM_016906|K03083 glycogen synthase kinase 3 beta [EC:2.7.11.26] | (RefSeq) Shaggy-like kinase 13 isoform 1	--	[G]	Carbohydrate transport and metabolism	Protein kinase domain;; Protein tyrosine kinase;; Kinase-like	Shaggy-related protein kinase epsilon GN=ASK5 OS=Arabidopsis thaliana (Mouse-ear cress) PE=2 SV=1	T	Signal transduction mechanisms	PREDICTED: shaggy-related protein kinase epsilon isoform X1 [Vitis vinifera]
F01_transcript_65011	[R]	General function prediction only	Molecular Function: GTP binding (GO:0005525);; Cellular Component: Golgi stack (GO:0005795);; Cellular Component: plasma membrane (GO:0005886);; Biological Process: small GTPase mediated signal transduction (GO:0007264);;	K07942|4.2387e-87|tcc:TCM_038846|K07942 ADP-ribosylation factor-like protein 1 | (RefSeq) ADP-ribosylation factor 3 isoform 1	--	[U]	Intracellular trafficking, secretion, and vesicular transport	ADP-ribosylation factor family;; Ras of Complex, Roc, domain of DAPkinase;; Ras family;; Gtr1/RagA G protein conserved region;; Signal recognition particle receptor beta subunit	ADP-ribosylation factor 1 GN=ARF1 OS=Brassica rapa subsp. pekinensis (Chinese cabbage) PE=2 SV=3	S	Function unknown	ADP-ribosylation factor 3 isoform 1 [Theobroma cacao]
F01_transcript_128962	[R]	General function prediction only	--	--	--	[R]	General function prediction only	WD domain, G-beta repeat	Transcriptional corepressor LEUNIG GN=LUG OS=Arabidopsis thaliana (Mouse-ear cress) PE=1 SV=2	K	Transcription	PREDICTED: transcriptional corepressor LEUNIG-like [Cucumis sativus]
F01_transcript_145755	[E]	Amino acid transport and metabolism	Molecular Function: aminopeptidase activity (GO:0004177);; Cellular Component: cytoplasm (GO:0005737);; Biological Process: proteolysis (GO:0006508);; Molecular Function: metalloexopeptidase activity (GO:0008235);; Molecular Function: manganese ion binding (GO:0030145);;	K01255|0|vvi:100250183|K01255 leucyl aminopeptidase [EC:3.4.11.1] | (RefSeq) leucine aminopeptidase 1	ko00480:Glutathione metabolism	[R]	General function prediction only	Cytosol aminopeptidase family, catalytic domain;; Cytosol aminopeptidase family, N-terminal domain	Leucine aminopeptidase 2, chloroplastic (Precursor) GN=LAPA2 OS=Solanum lycopersicum (Tomato) PE=1 SV=1	E	Amino acid transport and metabolism	PREDICTED: leucine aminopeptidase 1 [Vitis vinifera]
F01_transcript_142272	--	--	Cellular Component: integral component of membrane (GO:0016021);;	--	--	--	--	HR-like lesion-inducing	--	S	Function unknown	PREDICTED: uncharacterized protein LOC104732204 [Camelina sativa]
F01_transcript_22909	--	--	Molecular Function: SNARE binding (GO:0000149);; Molecular Function: SNAP receptor activity (GO:0005484);; Biological Process: intracellular protein transport (GO:0006886);; Biological Process: vesicle fusion (GO:0006906);; Cellular Component: endomembrane system (GO:0012505);; Cellular Component: integral component of membrane (GO:0016021);; Cellular Component: SNARE complex (GO:0031201);; Biolo…	K08503|6.14915e-131|sot:102597197|K08503 syntaxin of plants SYP5 | (RefSeq) syntaxin-51-like	ko04130:SNARE interactions in vesicular transport	[U]	Intracellular trafficking, secretion, and vesicular transport	SNARE domain	Syntaxin-51 GN=SYP51 OS=Arabidopsis thaliana (Mouse-ear cress) PE=1 SV=1	U	Intracellular trafficking, secretion, and vesicular transport	PREDICTED: syntaxin-51-like [Sesamum indicum]
F01_transcript_111374	--	--	--	--	--	--	--	PWWP domain	Serine/threonine-protein kinase ATM GN=ATM OS=Arabidopsis thaliana (Mouse-ear cress) PE=2 SV=1	S	Function unknown	PREDICTED: uncharacterized protein LOC100267992 [Vitis vinifera]
F01_transcript_77265	--	--	--	--	--	--	--	Domain of unknown function (DUF4228)	--	S	Function unknown	unnamed protein product [Coffea canephora]
F01_transcript_90958	--	--	Molecular Function: DNA binding (GO:0003677);; Cellular Component: nucleus (GO:0005634);; Biological Process: regulation of transcription, DNA-templated (GO:0006355);; Molecular Function: zinc ion binding (GO:0008270);; Biological Process: response to ethylene (GO:0009723);;	--	--	--	--	Myb-like DNA-binding domain	Transcription factor DIVARICATA GN=DIVARICATA OS=Antirrhinum majus (Garden snapdragon) PE=2 SV=1	K	Transcription	PREDICTED: uncharacterized protein LOC105164353 [Sesamum indicum]
F01_transcript_118100	--	--	Biological Process: response to light stimulus (GO:0009416);; Cellular Component: photosystem I (GO:0009522);; Cellular Component: chloroplast thylakoid membrane (GO:0009535);; Biological Process: photosynthesis, light harvesting in photosystem I (GO:0009768);; Cellular Component: chloroplast envelope (GO:0009941);; Cellular Component: plastoglobule (GO:0010287);; Cellular Component: integral com…	K08917|6.05156e-145|gmx:100500118|K08917 light-harvesting complex II chlorophyll a/b binding protein 6 | (RefSeq) chlorophyll a-b binding protein CP24 10A, chloroplastic	ko00196:Photosynthesis - antenna proteins	--	--	Chlorophyll A-B binding protein	Chlorophyll a-b binding protein CP24 10A, chloroplastic (Precursor) GN=CAP10A OS=Solanum lycopersicum (Tomato) PE=3 SV=1	S	Function unknown	chlorophyll a/b-binding protein CP24 precursor [Vigna radiata]
F01_transcript_42774	--	--	Cellular Component: nucleus (GO:0005634);; Biological Process: regulation of DNA replication (GO:0006275);; Molecular Function: zinc ion binding (GO:0008270);; Biological Process: DNA mediated transformation (GO:0009294);; Cellular Component: chloroplast (GO:0009507);; Biological Process: pollen development (GO:0009555);; Molecular Function: histone methyltransferase activity (H3-K27 specific) (G…	--	--	[K]	Transcription	PHD-finger;; SET domain	Probable Histone-lysine N-methyltransferase ATXR5 (Precursor) GN=ATXR5 OS=Ricinus communis (Castor bean) PE=1 SV=1	S	Function unknown	PREDICTED: probable Histone-lysine N-methyltransferase ATXR5 [Vitis vinifera]
F01_transcript_128956	[G]	Carbohydrate transport and metabolism	Cellular Component: plasma membrane (GO:0005886);; Biological Process: flavonoid biosynthetic process (GO:0009813);; Biological Process: sterol metabolic process (GO:0016125);; Biological Process: lipid glycosylation (GO:0030259);; Cellular Component: intracellular membrane-bounded organelle (GO:0043231);; Biological Process: seed development (GO:0048316);; Molecular Function: beta-sitosterol UDP…	K05841|0|pper:PRUPE_ppa002976mg|K05841 sterol 3beta-glucosyltransferase [EC:2.4.1.173] | (RefSeq) hypothetical protein	--	[GC]	--	Glycosyltransferase family 28 N-terminal domain;; UDP-glucoronosyl and UDP-glucosyl transferase;; Glycosyltransferase family 28 N-terminal domain	Sterol 3-beta-glucosyltransferase UGT80A2 GN=UGT80A2 OS=Arabidopsis thaliana (Mouse-ear cress) PE=1 SV=1	S	Function unknown	UDP-glucose:sterol 3-O-glucosyltransferase [Panax ginseng]
F01_transcript_120453	--	--	Molecular Function: protein serine/threonine kinase activity (GO:0004674);; Molecular Function: ATP binding (GO:0005524);; Cellular Component: cytosol (GO:0005829);; Biological Process: protein phosphorylation (GO:0006468);; Cellular Component: plasmodesma (GO:0009506);;	K12200|3.71487e-32|sot:102584129|K12200 programmed cell death 6-interacting protein | (RefSeq) ALG-2 interacting protein X-like	ko04144:Endocytosis	[G]	Carbohydrate transport and metabolism	Der1-like family	Shaggy-related protein kinase eta GN=F28A21.120 OS=Arabidopsis thaliana (Mouse-ear cress) PE=1 SV=2	S	Function unknown	PREDICTED: ALG-2 interacting protein X-like [Solanum tuberosum]
F01_transcript_101488	[J]	Translation, ribosomal structure and biogenesis	Molecular Function: RNA binding (GO:0003723);; Molecular Function: serine-type endopeptidase activity (GO:0004252);; Biological Process: proteolysis (GO:0006508);; Molecular Function: tRNA (guanine) methyltransferase activity (GO:0016423);; Biological Process: tRNA methylation (GO:0030488);;	--	--	[A]	RNA processing and modification	SpoU rRNA Methylase family	--	J	Translation, ribosomal structure and biogenesis	PREDICTED: uncharacterized protein LOC105141881 isoform X2 [Populus euphratica]
F01_transcript_102158	--	--	--	--	--	[T]	Signal transduction mechanisms	BAG domain	BAG family molecular chaperone regulator 1 GN=BAG1 OS=Arabidopsis thaliana (Mouse-ear cress) PE=1 SV=1	O	Posttranslational modification, protein turnover, chaperones	PREDICTED: BAG family molecular chaperone regulator 1 [Nicotiana tomentosiformis]
F01_transcript_127866	[G]	Carbohydrate transport and metabolism	Molecular Function: zinc ion binding (GO:0008270);; Molecular Function: cinnamyl-alcohol dehydrogenase activity (GO:0045551);; Molecular Function: sinapyl alcohol dehydrogenase activity (GO:0052747);; Biological Process: oxidation-reduction process (GO:0055114);;	K00083|0|vvi:100855415|K00083 cinnamyl-alcohol dehydrogenase [EC:1.1.1.195] | (RefSeq) probable mannitol dehydrogenase	ko00940:Phenylpropanoid biosynthesis	[Q]	Secondary metabolites biosynthesis, transport and catabolism	Alcohol dehydrogenase GroES-like domain;; Zinc-binding dehydrogenase;; D-isomer specific 2-hydroxyacid dehydrogenase, NAD binding domain	Probable mannitol dehydrogenase GN=CAD OS=Fragaria ananassa (Strawberry) PE=2 SV=1	C	Energy production and conversion	mannitol dehydrogenase 1 [Vitis vinifera]
F01_transcript_141447	--	--	Molecular Function: DNA binding (GO:0003677);; Cellular Component: nucleus (GO:0005634);; Biological Process: regulation of transcription, DNA-templated (GO:0006355);; Biological Process: auxin-activated signaling pathway (GO:0009734);;	K14486|3.0533e-84|cit:102618110|K14486 auxin response factor | (RefSeq) auxin response factor 1	ko04075:Plant hormone signal transduction	--	--	AUX/IAA family	Auxin response factor 1 GN=ARF1 OS=Arabidopsis thaliana (Mouse-ear cress) PE=1 SV=2	K	Transcription	hypothetical protein CISIN_1g023145mg [Citrus sinensis]
F01_transcript_70521	[G]	Carbohydrate transport and metabolism	Cellular Component: vacuole (GO:0005773);; Cellular Component: integral component of plasma membrane (GO:0005887);; Biological Process: water transport (GO:0006833);; Cellular Component: plasmodesma (GO:0009506);; Biological Process: cellular water homeostasis (GO:0009992);; Molecular Function: water channel activity (GO:0015250);; Molecular Function: glycerol channel activity (GO:0015254);; Biol…	K09872|0|vvi:100233027|K09872 aquaporin PIP | (RefSeq) PIP2;2; aquaporin PIP2;2	--	[G]	Carbohydrate transport and metabolism	Major intrinsic protein	Probable aquaporin PIP2-8, N-terminally processed GN=F12A24.3 OS=Arabidopsis thaliana (Mouse-ear cress) PE=1 SV=1	G	Carbohydrate transport and metabolism	aquaporin PIP2;2 [Vitis vinifera]
F01_transcript_88137	[F]	Nucleotide transport and metabolism	Molecular Function: ribokinase activity (GO:0004747);; Cellular Component: cytosol (GO:0005829);; Biological Process: D-ribose metabolic process (GO:0006014);; Biological Process: carbohydrate phosphorylation (GO:0046835);;	K00847|1.23224e-42|pmum:103333278|K00847 fructokinase [EC:2.7.1.4] | (RefSeq) probable fructokinase-7	ko00051:Fructose and mannose metabolism;ko00500:Starch and sucrose metabolism;ko00520:Amino sugar and nucleotide sugar metabolism	[G]	Carbohydrate transport and metabolism	Nucleoside diphosphate kinase;; Thymidylate kinase	Probable fructokinase-7 OS=Arabidopsis thaliana (Mouse-ear cress) PE=1 SV=1	G	Carbohydrate transport and metabolism	fructokinase [Actinidia chinensis]
F01_transcript_33719	--	--	Cellular Component: membrane (GO:0016020);;	--	--	--	--	Late embryogenesis abundant protein	--	S	Function unknown	PREDICTED: uncharacterized protein LOC105164048 [Sesamum indicum]
F01_transcript_27995	--	--	Molecular Function: nucleic acid binding (GO:0003676);; Molecular Function: zinc ion binding (GO:0008270);;	K14821|2.56871e-48|sot:102605103|K14821 bud site selection protein 20 | (RefSeq) zinc finger protein 593	--	[A]	RNA processing and modification	Zinc-finger double-stranded RNA-binding	--	S	Function unknown	PREDICTED: zinc finger protein 593 [Nicotiana tomentosiformis]
F01_transcript_73299	--	--	Molecular Function: nucleotide binding (GO:0000166);; Molecular Function: RNA binding (GO:0003723);; Cellular Component: cytoplasm (GO:0005737);;	K13126|3.76513e-31|vvi:100263065|K13126 polyadenylate-binding protein | (RefSeq) polyadenylate-binding protein 3	ko03013:RNA transport;ko03015:mRNA surveillance pathway;ko03018:RNA degradation	[AJ]	--	Poly-adenylate binding protein, unique domain	Polyadenylate-binding protein 2 GN=PAB2 OS=Arabidopsis thaliana (Mouse-ear cress) PE=1 SV=1	S	Function unknown	PREDICTED: LOW QUALITY PROTEIN: polyadenylate-binding protein 2 [Nelumbo nucifera]
F01_transcript_116083	[O]	Posttranslational modification, protein turnover, chaperones	Molecular Function: ATP binding (GO:0005524);; Cellular Component: plasma membrane (GO:0005886);; Molecular Function: peptidase activity (GO:0008233);; Cellular Component: proteasome regulatory particle, base subcomplex (GO:0008540);; Molecular Function: TBP-class protein binding (GO:0017025);; Biological Process: ubiquitin-dependent ERAD pathway (GO:0030433);; Cellular Component: nuclear proteas…	K03061|0|tcc:TCM_029263|K03061 26S proteasome regulatory subunit T1 | (RefSeq) Regulatory particle triple-A 1A	ko03050:Proteasome	[O]	Posttranslational modification, protein turnover, chaperones	ATPase family associated with various cellular activities (AAA);; AAA domain (Cdc48 subfamily)	26S protease regulatory subunit 7 GN=RPT1 OS=Prunus persica (Peach) PE=2 SV=1	O	Posttranslational modification, protein turnover, chaperones	hypothetical protein EUGRSUZ_I02169 [Eucalyptus grandis]
F01_transcript_54306	[J]	Translation, ribosomal structure and biogenesis	Molecular Function: RNA binding (GO:0003723);; Molecular Function: structural constituent of ribosome (GO:0003735);; Biological Process: translation (GO:0006412);; Cellular Component: cytosolic large ribosomal subunit (GO:0022625);;	K02883|1.19574e-119|pop:POPTR_0002s20400g|K02883 large subunit ribosomal protein L18e | (RefSeq) POPTRDRAFT_552462; 60S ribosomal protein L18	ko03010:Ribosome	[J]	Translation, ribosomal structure and biogenesis	Ribosomal protein 60S L18 and 50S L18e;; Ribosomal proteins 50S-L15, 50S-L18e, 60S-L27A	60S ribosomal protein L18-2 GN=RPL18B OS=Arabidopsis thaliana (Mouse-ear cress) PE=1 SV=2	J	Translation, ribosomal structure and biogenesis	PREDICTED: 60S ribosomal protein L18-2 [Eucalyptus grandis]
F01_transcript_128291	--	--	Biological Process: DNA repair (GO:0006281);; Biological Process: DNA recombination (GO:0006310);;	--	--	[BDL]	--	--	Structural maintenance of chromosomes protein 5 GN=F1N13.60 OS=Arabidopsis thaliana (Mouse-ear cress) PE=2 SV=1	D	Cell cycle control, cell division, chromosome partitioning	PREDICTED: structural maintenance of chromosomes protein 5 [Vitis vinifera]
F01_transcript_94419	--	--	--	--	--	--	--	--	--	S	Function unknown	PREDICTED: uncharacterized protein LOC100819278 [Glycine max]
F01_transcript_18528	--	--	--	--	--	--	--	Small acidic protein family	--	S	Function unknown	PREDICTED: arginine/serine-rich coiled-coil protein 2 isoform X2 [Vitis vinifera]
F01_transcript_82522	--	--	Molecular Function: protein dimerization activity (GO:0046983);;	--	--	--	--	Helix-loop-helix DNA-binding domain	Transcription factor bHLH121 GN=MPN9.10 OS=Arabidopsis thaliana (Mouse-ear cress) PE=2 SV=1	K	Transcription	PREDICTED: transcription factor bHLH121 [Nicotiana sylvestris]
F01_transcript_57658	--	--	Molecular Function: chaperone binding (GO:0051087);;	--	--	[T]	Signal transduction mechanisms	--	BAG family molecular chaperone regulator 1 GN=BAG1 OS=Arabidopsis thaliana (Mouse-ear cress) PE=1 SV=1	O	Posttranslational modification, protein turnover, chaperones	PREDICTED: BAG family molecular chaperone regulator 3-like [Solanum lycopersicum]
F01_transcript_88340	[M]	Cell wall/membrane/envelope biogenesis	--	--	--	[R]	General function prediction only	Kelch motif;; Kelch motif	F-box/kelch-repeat protein SKIP11 GN=SKIP11 OS=Arabidopsis thaliana (Mouse-ear cress) PE=1 SV=2	S	Function unknown	unnamed protein product [Coffea canephora]
F01_transcript_101958	--	--	--	--	--	--	--	--	Nuclear pore complex protein NUP1 OS=Arabidopsis thaliana (Mouse-ear cress) PE=1 SV=1	S	Function unknown	PREDICTED: nuclear pore complex protein NUP1 isoform X1 [Vitis vinifera]
F01_transcript_88235	--	--	Biological Process: protein peptidyl-prolyl isomerization (GO:0000413);; Molecular Function: peptidyl-prolyl cis-trans isomerase activity (GO:0003755);; Cellular Component: integral component of membrane (GO:0016021);;	K09578|4.48293e-25|tcc:TCM_000228|K09578 peptidyl-prolyl cis-trans isomerase NIMA-interacting 1 [EC:5.2.1.8] | (RefSeq) Peptidylprolyl cis/trans isomerase	--	[G]	Carbohydrate transport and metabolism	--	Peptidyl-prolyl cis-trans isomerase Pin1 GN=PIN1 OS=Malus domestica (Apple) PE=2 SV=1	O	Posttranslational modification, protein turnover, chaperones	Peptidylprolyl cis/trans isomerase [Theobroma cacao]
F01_transcript_92775	[DZ]	--	--	--	--	[S]	Function unknown	Regulator of chromosome condensation (RCC1) repeat;; Regulator of chromosome condensation (RCC1) repeat	Ultraviolet-B receptor UVR8 GN=UVR8 OS=Arabidopsis thaliana (Mouse-ear cress) PE=1 SV=1	DZ	--	Ankyrin repeat domain-containing protein [Medicago truncatula]
F01_transcript_21907	[R]	General function prediction only	Molecular Function: protein binding (GO:0005515);;	--	--	[R]	General function prediction only	Tetratricopeptide repeat;; Tetratricopeptide repeat;; Tetratricopeptide repeat;; Tetratricopeptide repeat;; TPR repeat;; Fis1 C-terminal tetratricopeptide repeat;; Tetratricopeptide repeat	TPR repeat-containing thioredoxin TTL4 GN=TTL4 OS=Arabidopsis thaliana (Mouse-ear cress) PE=2 SV=1	S	Function unknown	Tetratricopeptide repeat (TPR)-like superfamily protein [Theobroma cacao]
F01_transcript_16434	--	--	Cellular Component: membrane (GO:0016020);;	--	--	--	--	Purine nucleobase transmembrane transport	Probable purine permease 10 GN=PUP10 OS=Arabidopsis thaliana (Mouse-ear cress) PE=2 SV=2	U	Intracellular trafficking, secretion, and vesicular transport	PREDICTED: probable purine permease 9 [Prunus mume]
F01_transcript_76274	[E]	Amino acid transport and metabolism	Molecular Function: glutamate-ammonia ligase activity (GO:0004356);; Molecular Function: ATP binding (GO:0005524);; Biological Process: glutamine biosynthetic process (GO:0006542);; Biological Process: nitrogen fixation (GO:0009399);; Cellular Component: chloroplast (GO:0009507);;	--	--	[E]	Amino acid transport and metabolism	Prolyl oligopeptidase, N-terminal beta-propeller domain	Glutamine synthetase, chloroplastic (Precursor) GN=GLN2 OS=Daucus carota (Wild carrot) PE=2 SV=1	E	Amino acid transport and metabolism	hypothetical protein EUGRSUZ_L021752, partial [Eucalyptus grandis]
F01_transcript_99801	--	--	--	--	--	[O]	Posttranslational modification, protein turnover, chaperones	Thioredoxin-like;; UBA-like domain	--	S	Function unknown	PREDICTED: UBX domain-containing protein 2 isoform X2 [Vitis vinifera]
F01_transcript_103669	[G]	Carbohydrate transport and metabolism	Cellular Component: male germ cell nucleus (GO:0001673);; Biological Process: pollen development (GO:0009555);; Biological Process: embryo development ending in seed dormancy (GO:0009793);; Cellular Component: SCF ubiquitin ligase complex (GO:0019005);; Biological Process: SCF-dependent proteasomal ubiquitin-dependent protein catabolic process (GO:0031146);; Biological Process: generative cell mi…	--	--	--	--	--	Beta-glucosidase 34 (Precursor) OS=Oryza sativa subsp. japonica (Rice) PE=2 SV=1	S	Function unknown	PREDICTED: F-box/LRR-repeat protein 17 [Vitis vinifera]
F01_transcript_64600	--	--	--	K15601|0|sly:101260929|K15601 lysine-specific demethylase 3 [EC:1.14.11.-] | (RefSeq) lysine-specific demethylase JMJ25-like	--	[K]	Transcription	Zinc-finger domain of monoamine-oxidase A repressor R1;; JmjC domain, hydroxylase	Lysine-specific demethylase JMJ25 GN=MLP3.6 OS=Arabidopsis thaliana (Mouse-ear cress) PE=1 SV=1	S	Function unknown	PREDICTED: lysine-specific demethylase JMJ25-like [Nicotiana sylvestris]
F01_transcript_128941	--	--	Biological Process: deadenylation-dependent decapping of nuclear-transcribed mRNA (GO:0000290);; Cellular Component: P-body (GO:0000932);; Molecular Function: mRNA binding (GO:0003729);; Molecular Function: enzyme activator activity (GO:0008047);; Biological Process: deadenylation-independent decapping of nuclear-transcribed mRNA (GO:0031087);; Biological Process: positive regulation of catalytic…	K12611|9.34218e-112|vvi:100242537|K12611 mRNA-decapping enzyme 1B [EC:3.-.-.-] | (RefSeq) mRNA-decapping enzyme-like protein	ko03018:RNA degradation	[KA]	--	Dcp1-like decapping family	mRNA-decapping enzyme-like protein GN=At1g08370 OS=Arabidopsis thaliana (Mouse-ear cress) PE=1 SV=2	S	Function unknown	PREDICTED: mRNA-decapping enzyme-like protein [Vitis vinifera]
F01_transcript_100818	--	--	Molecular Function: ATP binding (GO:0005524);; Biological Process: response to wounding (GO:0009611);; Biological Process: response to salt stress (GO:0009651);; Biological Process: response to abscisic acid (GO:0009737);; Cellular Component: external side of plasma membrane (GO:0009897);; Biological Process: stem vascular tissue pattern formation (GO:0010222);; Biological Process: cotyledon vasc…	--	--	[Q]	Secondary metabolites biosynthesis, transport and catabolism	--	ABC transporter G family member 11 GN=At1g17840 OS=Arabidopsis thaliana (Mouse-ear cress) PE=1 SV=1	V	Defense mechanisms	PREDICTED: ABC transporter G family member 11 [Cucumis melo]
F01_transcript_55713	--	--	--	--	--	[R]	General function prediction only	GYF domain	--	S	Function unknown	unnamed protein product [Coffea canephora]
F01_transcript_61583	--	--	--	--	--	--	--	Domain of unknown function (DUF3475);; Protein of unknown function (DUF668)	--	S	Function unknown	PREDICTED: uncharacterized protein LOC100241980 isoform X1 [Vitis vinifera]
F01_transcript_95401	[J]	Translation, ribosomal structure and biogenesis	Molecular Function: nucleotide binding (GO:0000166);; Molecular Function: nucleic acid binding (GO:0003676);; Biological Process: mRNA splice site selection (GO:0006376);; Cellular Component: nuclear speck (GO:0016607);; Cellular Component: interchromatin granule (GO:0035061);;	K12890|8.35319e-85|sly:101257012|K12890 splicing factor, arginine/serine-rich 1 | (RefSeq) serine/arginine-rich splicing factor SR30	ko03040:Spliceosome	[A]	RNA processing and modification	RNA recognition motif. (a.k.a. RRM, RBD, or RNP domain)	Serine/arginine-rich-splicing factor SR34 OS=Arabidopsis thaliana (Mouse-ear cress) PE=1 SV=1	S	Function unknown	hypothetical protein VITISV_040486 [Vitis vinifera]
F01_transcript_124713	--	--	Molecular Function: RNA binding (GO:0003723);; Molecular Function: signal recognition particle binding (GO:0005047);; Cellular Component: endoplasmic reticulum (GO:0005783);; Cellular Component: signal recognition particle, endoplasmic reticulum targeting (GO:0005786);; Biological Process: protein targeting to ER (GO:0045047);;	K03107|4.51934e-180|sot:102600623|K03107 signal recognition particle subunit SRP68 | (RefSeq) signal recognition particle subunit SRP68-like	ko03060:Protein export	[U]	Intracellular trafficking, secretion, and vesicular transport	RNA-binding signal recognition particle 68;; RNA-binding signal recognition particle 68;; RNA-binding signal recognition particle 68	--	U	Intracellular trafficking, secretion, and vesicular transport	PREDICTED: signal recognition particle subunit SRP68-like [Solanum tuberosum]
F01_transcript_29083	--	--	--	K03966|1.65646e-58|csv:101213094|K03966 NADH dehydrogenase (ubiquinone) 1 beta subcomplex subunit 10 | (RefSeq) NADH dehydrogenase [ubiquinone] 1 beta subcomplex subunit 10-B	ko00190:Oxidative phosphorylation	[C]	Energy production and conversion	NADH-ubiquinone oxidoreductase subunit 10	NADH dehydrogenase [ubiquinone] 1 beta subcomplex subunit 10-A GN=At1g49140 OS=Arabidopsis thaliana (Mouse-ear cress) PE=3 SV=1	I	Lipid transport and metabolism	PREDICTED: NADH dehydrogenase [ubiquinone] 1 beta subcomplex subunit 10-B-like isoform 1 [Cucumis sativus]
F01_transcript_55773	[K]	Transcription	Molecular Function: nucleotide binding (GO:0000166);;	--	--	[T]	Signal transduction mechanisms	NB-ARC domain;; Leucine rich repeat;; NACHT domain;; NB-ARC domain;; AAA domain	Probable disease resistance RPP8-like protein 2 GN=RPP8L2 OS=Arabidopsis thaliana (Mouse-ear cress) PE=3 SV=1	S	Function unknown	Disease resistance protein family, putative [Theobroma cacao]
F01_transcript_117923	[H]	Coenzyme transport and metabolism	Biological Process: metabolic process (GO:0008152);; Molecular Function: hydrolase activity (GO:0016787);;	--	--	[R]	General function prediction only	haloacid dehalogenase-like hydrolase;; Haloacid dehalogenase-like hydrolase;; HAD-hyrolase-like	--	S	Function unknown	unnamed protein product [Coffea canephora]
F01_transcript_5806	--	--	--	--	--	[S]	Function unknown	C3HC zinc finger-like;; Rsm1-like	--	S	Function unknown	PREDICTED: uncharacterized protein LOC100243076 isoform X1 [Vitis vinifera]
F01_transcript_619	[P]	Inorganic ion transport and metabolism	Molecular Function: ATP binding (GO:0005524);; Cellular Component: endoplasmic reticulum (GO:0005783);; Cellular Component: integral component of plasma membrane (GO:0005887);; Molecular Function: cation-transporting ATPase activity (GO:0019829);; Molecular Function: metal ion binding (GO:0046872);; Biological Process: cation transmembrane transport (GO:0098655);;	K01537|0|tcc:TCM_041938|K01537 Ca2+-transporting ATPase [EC:3.6.3.8] | (RefSeq) Endoplasmic reticulum [ER]-type calcium ATPase isoform 1	--	[P]	Inorganic ion transport and metabolism	E1-E2 ATPase;; Cation transporting ATPase, C-terminus;; haloacid dehalogenase-like hydrolase;; Cation transporter/ATPase, N-terminus;; Cation transport ATPase (P-type);; haloacid dehalogenase-like hydrolase	Calcium-transporting ATPase 1, endoplasmic reticulum-type GN=F24B9.9 OS=Arabidopsis thaliana (Mouse-ear cress) PE=1 SV=2	P	Inorganic ion transport and metabolism	Calcium-transporting ATPase 1, endoplasmic reticulum-type [Morus notabilis]
F01_transcript_109762	--	--	Cellular Component: integral component of membrane (GO:0016021);;	--	--	[U]	Intracellular trafficking, secretion, and vesicular transport	--	--	S	Function unknown	PREDICTED: uncharacterized protein LOC100258552 isoform X2 [Vitis vinifera]
F01_transcript_137045	--	--	Cellular Component: membrane (GO:0016020);;	--	--	--	--	Protein of unknown function (DUF616)	--	S	Function unknown	PREDICTED: uncharacterized protein LOC101250652 [Solanum lycopersicum]
F01_transcript_98920	[T]	Signal transduction mechanisms	Cellular Component: integral component of membrane (GO:0016021);;	--	--	--	--	CBS domain;; PB1 domain	CBS domain-containing protein CBSCBSPB5 GN=CBSCBSPB5 OS=Arabidopsis thaliana (Mouse-ear cress) PE=1 SV=1	S	Function unknown	unnamed protein product [Coffea canephora]
F01_transcript_70356	--	--	Cellular Component: proteasome complex (GO:0000502);; Biological Process: response to salt stress (GO:0009651);;	--	--	--	--	--	--	S	Function unknown	conserved hypothetical protein [Ricinus communis]
F01_transcript_25123	[R]	General function prediction only	Molecular Function: GTP binding (GO:0005525);; Cellular Component: endoplasmic reticulum (GO:0005783);; Cellular Component: Golgi apparatus (GO:0005794);; Cellular Component: plasma membrane (GO:0005886);; Biological Process: intracellular protein transport (GO:0006886);; Biological Process: vesicle-mediated transport (GO:0016192);;	K07953|8.56339e-119|csv:101221276|K07953 GTP-binding protein SAR1 [EC:3.6.5.-] | (RefSeq) GTP-binding protein SAR1A	ko04141:Protein processing in endoplasmic reticulum	[U]	Intracellular trafficking, secretion, and vesicular transport	ADP-ribosylation factor family;; Ras of Complex, Roc, domain of DAPkinase;; Signal recognition particle receptor beta subunit;; 50S ribosome-binding GTPase;; Ras family	GTP-binding protein SAR1A GN=SAR1A OS=Arabidopsis thaliana (Mouse-ear cress) PE=2 SV=1	U	Intracellular trafficking, secretion, and vesicular transport	PREDICTED: GTP-binding protein SAR1A-like [Cucumis sativus]
F01_transcript_140209	[H]	Coenzyme transport and metabolism	--	--	--	--	--	Uroporphyrinogen-III synthase HemD	--	H	Coenzyme transport and metabolism	unnamed protein product [Coffea canephora]
F01_transcript_79556	--	--	Cellular Component: membrane (GO:0016020);;	K20891|1.1849e-08|sot:102592063|K20891 beta-glucuronosyltransferase [EC:2.4.1.-] | (RefSeq) beta-glucuronosyltransferase GlcAT14A-like	--	[G]	Carbohydrate transport and metabolism	--	--	S	Function unknown	PREDICTED: xylosyltransferase 1-like [Solanum tuberosum]
F01_transcript_107252	[T]	Signal transduction mechanisms	--	--	--	--	--	WD domain, G-beta repeat;; Anaphase-promoting complex subunit 4 WD40 domain	Transcription initiation factor TFIID subunit 5 GN=TAF5 OS=Arabidopsis thaliana (Mouse-ear cress) PE=1 SV=1	S	Function unknown	Uncharacterized WD repeat-containing protein [Morus notabilis]
F01_transcript_89897	--	--	Cellular Component: commitment complex (GO:0000243);; Biological Process: spliceosomal complex assembly (GO:0000245);; Biological Process: spliceosomal snRNP assembly (GO:0000387);; Molecular Function: RNA binding (GO:0003723);; Cellular Component: U5 snRNP (GO:0005682);; Cellular Component: U1 snRNP (GO:0005685);; Cellular Component: U2 snRNP (GO:0005686);; Cellular Component: U4 snRNP (GO:00056…	K11087|6.02908e-55|sot:102593694|K11087 small nuclear ribonucleoprotein D1 | (RefSeq) small nuclear ribonucleoprotein Sm D1-like	ko03040:Spliceosome	[A]	RNA processing and modification	LSM domain	Probable U6 snRNA-associated Sm-like protein LSm4 OS=Nicotiana tabacum (Common tobacco) PE=2 SV=1	K	Transcription	PREDICTED: small nuclear ribonucleoprotein Sm D1 [Nicotiana sylvestris]
F01_transcript_62635	[J]	Translation, ribosomal structure and biogenesis	Biological Process: cytoplasmic translation (GO:0002181);; Molecular Function: structural constituent of ribosome (GO:0003735);; Cellular Component: cytosolic large ribosomal subunit (GO:0022625);; Cellular Component: preribosome, large subunit precursor (GO:0030687);; Biological Process: ribosome biogenesis (GO:0042254);; Molecular Function: large ribosomal subunit rRNA binding (GO:0070180);;	K02941|5.00496e-80|vvi:100250067|K02941 large subunit ribosomal protein LP0 | (RefSeq) 60S acidic ribosomal protein P0	ko03010:Ribosome	[J]	Translation, ribosomal structure and biogenesis	60s Acidic ribosomal protein	60S acidic ribosomal protein P0 OS=Glycine max (Soybean) PE=1 SV=1	J	Translation, ribosomal structure and biogenesis	unnamed protein product [Coffea canephora]
F01_transcript_145227	[EQ]	--	Cellular Component: cytosol (GO:0005829);; Biological Process: glutathione catabolic process (GO:0006751);; Cellular Component: plasmodesma (GO:0009506);; Molecular Function: 5-oxoprolinase (ATP-hydrolyzing) activity (GO:0017168);;	--	--	[E]	Amino acid transport and metabolism	Hydantoinase B/oxoprolinase;; Hydantoinase B/oxoprolinase	5-oxoprolinase GN=OXP1 OS=Arabidopsis thaliana (Mouse-ear cress) PE=2 SV=1	EQ	--	5-oxoprolinase, putative [Ricinus communis]
F01_transcript_50037	--	--	--	--	--	--	--	--	--	S	Function unknown	PREDICTED: uncharacterized protein LOC104585816 [Nelumbo nucifera]
F01_transcript_81837	[D]	Cell cycle control, cell division, chromosome partitioning	--	--	--	[S]	Function unknown	WD domain, G-beta repeat	Transcription initiation factor TFIID subunit 5 GN=TAF5 OS=Arabidopsis thaliana (Mouse-ear cress) PE=1 SV=1	S	Function unknown	PREDICTED: WD repeat-containing protein 26-like [Vitis vinifera]
F01_transcript_99367	--	--	Biological Process: polysaccharide biosynthetic process (GO:0000271);; Cellular Component: Golgi apparatus (GO:0005794);; Molecular Function: transferase activity, transferring glycosyl groups (GO:0016757);;	--	--	[O]	Posttranslational modification, protein turnover, chaperones	--	Probable galacturonosyltransferase-like 7 GN=GATL7 OS=Arabidopsis thaliana (Mouse-ear cress) PE=2 SV=1	O	Posttranslational modification, protein turnover, chaperones	PREDICTED: probable galacturonosyltransferase-like 7 [Nelumbo nucifera]
F01_transcript_139830	--	--	Biological Process: cellular glucose homeostasis (GO:0001678);; Molecular Function: hexokinase activity (GO:0004396);; Molecular Function: ATP binding (GO:0005524);; Molecular Function: glucose binding (GO:0005536);; Cellular Component: cell (GO:0005623);; Biological Process: glycolytic process (GO:0006096);; Biological Process: carbohydrate phosphorylation (GO:0046835);;	K00844|5.13107e-34|pmum:103340810|K00844 hexokinase [EC:2.7.1.1] | (RefSeq) hexokinase-1	ko00010:Glycolysis / Gluconeogenesis;ko00051:Fructose and mannose metabolism;ko00052:Galactose metabolism;ko00500:Starch and sucrose metabolism;ko00520:Amino sugar and nucleotide sugar metabolism;ko01200:Carbon metabolism	[G]	Carbohydrate transport and metabolism	Hexokinase	Hexokinase-1 GN=HXK1 OS=Spinacia oleracea (Spinach) PE=2 SV=1	G	Carbohydrate transport and metabolism	PREDICTED: hexokinase-1 [Sesamum indicum]
F01_transcript_13467	--	--	--	--	--	[L]	Replication, recombination and repair	DDE superfamily endonuclease	--	S	Function unknown	PREDICTED: uncharacterized protein LOC104114070 [Nicotiana tomentosiformis]
F01_transcript_56514	[E]	Amino acid transport and metabolism	Cellular Component: late endosome (GO:0005770);; Biological Process: protein targeting to vacuole (GO:0006623);; Molecular Function: zinc ion binding (GO:0008270);; Biological Process: gravitropism (GO:0009630);; Cellular Component: HOPS complex (GO:0030897);; Cellular Component: CORVET complex (GO:0033263);; Biological Process: regulation of SNARE complex assembly (GO:0035542);; Biological Proce…	K20184|1.95783e-92|pvu:PHAVU_011G088100g|K20184 vacuolar protein sorting-associated protein 41 | (RefSeq) hypothetical protein	--	[U]	Intracellular trafficking, secretion, and vesicular transport	Region in Clathrin and VPS	Vacuolar protein sorting-associated protein 41 homolog GN=VPS41 OS=Arabidopsis thaliana (Mouse-ear cress) PE=3 SV=3	S	Function unknown	unnamed protein product [Vitis vinifera]
F01_transcript_12658	--	--	--	--	--	--	--	--	--	S	Function unknown	unnamed protein product [Coffea canephora]
F01_transcript_115958	--	--	--	K02146|2.06488e-89|cic:CICLE_v10012084mg|K02146 V-type H+-transporting ATPase subunit d | (RefSeq) hypothetical protein	ko00190:Oxidative phosphorylation;ko04145:Phagosome	[C]	Energy production and conversion	ATP synthase (C/AC39) subunit;; ATP synthase (C/AC39) subunit;; ATP synthase (C/AC39) subunit;; ATP synthase (C/AC39) subunit	Probable V-type proton ATPase subunit d OS=Oryza sativa subsp. japonica (Rice) PE=2 SV=1	C	Energy production and conversion	putative vacuolar ATPase subunit d [Mesembryanthemum crystallinum]
F01_transcript_38164	--	--	Cellular Component: integral component of membrane (GO:0016021);;	--	--	[S]	Function unknown	--	--	S	Function unknown	PREDICTED: protein YIPF1 homolog [Cicer arietinum]
F01_transcript_57856	--	--	--	--	--	[S]	Function unknown	Chromosome segregation during meiosis	--	S	Function unknown	Uncharacterized protein TCM_017290 [Theobroma cacao]
F01_transcript_86351	[M]	Cell wall/membrane/envelope biogenesis	Molecular Function: protein serine/threonine kinase activity (GO:0004674);; Molecular Function: ATP binding (GO:0005524);; Cellular Component: nucleus (GO:0005634);; Cellular Component: cytoplasm (GO:0005737);; Cellular Component: plasma membrane (GO:0005886);; Biological Process: protein phosphorylation (GO:0006468);; Biological Process: intracellular signal transduction (GO:0035556);;	--	--	[R]	General function prediction only	Protein kinase domain;; Protein tyrosine kinase;; Protein kinase domain	Serine/threonine-protein kinase D6PKL1 GN=D6PKL1 OS=Arabidopsis thaliana (Mouse-ear cress) PE=1 SV=1	T	Signal transduction mechanisms	PREDICTED: protein kinase G11A-like isoform X1 [Solanum tuberosum]
F01_transcript_109755	[O]	Posttranslational modification, protein turnover, chaperones	Cellular Component: nucleus (GO:0005634);; Cellular Component: cytoplasm (GO:0005737);; Biological Process: protein ubiquitination involved in ubiquitin-dependent protein catabolic process (GO:0042787);;	K08770|0|pxb:103935043|K08770 ubiquitin C | (RefSeq) polyubiquitin	--	[OR]	--	Ubiquitin family;; Ubiquitin-2 like Rad60 SUMO-like;; Ubiquitin-like domain;; RNA methyltransferase;; Ubiquitin-2 like Rad60 SUMO-like;; DUF2407 ubiquitin-like domain;; Ubiquitin family;; Ubiquitin-2 like Rad60 SUMO-like;; Ubiquitin family;; Ubiquitin-2 like Rad60 SUMO-like;; Ubiquitin-like domain	NEDD8-like protein RUB2 (Precursor) GN=T20F21.24 OS=Arabidopsis thaliana (Mouse-ear cress) PE=1 SV=3	O	Posttranslational modification, protein turnover, chaperones	polyubiquitin (ubq10) [Arabidopsis thaliana]
F01_transcript_143274	--	--	--	--	--	[B]	Chromatin structure and dynamics	ATP-utilising chromatin assembly and remodelling N-terminal;; DDT domain	--	S	Function unknown	PREDICTED: DDT domain-containing protein DDB_G0282237 isoform X1 [Vitis vinifera]
F01_transcript_114213	[T]	Signal transduction mechanisms	Molecular Function: voltage-gated potassium channel activity (GO:0005249);; Cellular Component: integral component of plasma membrane (GO:0005887);; Biological Process: potassium ion transport (GO:0006813);; Biological Process: ion transmembrane transport (GO:0034220);; Biological Process: regulation of membrane potential (GO:0042391);;	--	--	[PT]	--	Ion transport protein;; Ankyrin repeats (3 copies);; KHA, dimerisation domain of potassium ion channel;; Ankyrin repeats (many copies);; Cyclic nucleotide-binding domain;; Ankyrin repeats (many copies);; Ion channel;; Ankyrin repeat;; Ankyrin repeat	Potassium channel AKT2 OS=Oryza sativa subsp. japonica (Rice) PE=2 SV=1	U	Intracellular trafficking, secretion, and vesicular transport	hypothetical protein JCGZ_04999 [Jatropha curcas]
F01_transcript_89519	--	--	Cellular Component: integral component of membrane (GO:0016021);; Molecular Function: phosphatidylinositol binding (GO:0035091);;	K17925|1.67296e-22|sly:101260805|K17925 sorting nexin-13 | (RefSeq) uncharacterized LOC101260805	--	[ZUD]	--	--	--	S	Function unknown	PREDICTED: uncharacterized protein LOC104105221 [Nicotiana tomentosiformis]
F01_transcript_107138	--	--	--	K12471|1.50267e-49|fve:101291328|K12471 epsin | (RefSeq) clathrin interactor EPSIN 2	ko04144:Endocytosis	--	--	--	Clathrin interactor EPSIN 3 GN=F25L23.150 OS=Arabidopsis thaliana (Mouse-ear cress) PE=2 SV=1	U	Intracellular trafficking, secretion, and vesicular transport	unnamed protein product [Coffea canephora]
F01_transcript_128578	[T]	Signal transduction mechanisms	Molecular Function: phosphoprotein phosphatase activity (GO:0004721);; Biological Process: protein dephosphorylation (GO:0006470);;	K15423|0|pxb:103951426|K15423 serine/threonine-protein phosphatase 4 catalytic subunit [EC:3.1.3.16] | (RefSeq) serine/threonine-protein phosphatase PP-X isozyme 2-like	--	[GT]	--	Calcineurin-like phosphoesterase	Serine/threonine-protein phosphatase PP-X isozyme 2 GN=PPX2 OS=Arabidopsis thaliana (Mouse-ear cress) PE=2 SV=2	T	Signal transduction mechanisms	PREDICTED: serine/threonine-protein phosphatase PP-X isozyme 2-like [Pyrus x bretschneideri]
F01_transcript_26286	[O]	Posttranslational modification, protein turnover, chaperones	Biological Process: protein polyubiquitination (GO:0000209);; Molecular Function: ATP binding (GO:0005524);; Cellular Component: cytoplasm (GO:0005737);; Biological Process: DNA repair (GO:0006281);; Biological Process: histone ubiquitination (GO:0016574);; Molecular Function: ligase activity (GO:0016874);; Molecular Function: ubiquitin protein ligase binding (GO:0031625);; Biological Process: pr…	K10573|4.58581e-93|pmum:103321620|K10573 ubiquitin-conjugating enzyme E2 A [EC:2.3.2.23] | (RefSeq) ubiquitin-conjugating enzyme E2 2-like	ko04120:Ubiquitin mediated proteolysis	[O]	Posttranslational modification, protein turnover, chaperones	Ubiquitin-conjugating enzyme	Ubiquitin-conjugating enzyme E2 2 GN=UBC2 OS=Medicago sativa (Alfalfa) PE=2 SV=1	O	Posttranslational modification, protein turnover, chaperones	ubiquitin-conjugating enzyme [Medicago truncatula]
F01_transcript_136357	--	--	--	--	--	--	--	--	--	S	Function unknown	PREDICTED: uncharacterized protein LOC103962042 isoform X1 [Pyrus x bretschneideri]
F01_transcript_116301	--	--	--	--	--	[R]	General function prediction only	GRF zinc finger;; PPR repeat	Pentatricopeptide repeat-containing protein At2g20540 GN=PCMP-E78 OS=Arabidopsis thaliana (Mouse-ear cress) PE=2 SV=1	S	Function unknown	unnamed protein product [Coffea canephora]
F01_transcript_106997	--	--	Cellular Component: nucleus (GO:0005634);; Cellular Component: vacuolar membrane (GO:0005774);;	--	--	--	--	COPI associated protein	--	S	Function unknown	PREDICTED: uncharacterized protein LOC105169281 [Sesamum indicum]
F01_transcript_33716	--	--	Cellular Component: endoplasmic reticulum (GO:0005783);;	--	--	[P]	Inorganic ion transport and metabolism	SPX domain	SPX domain-containing protein 4 GN=SPX4 OS=Arabidopsis thaliana (Mouse-ear cress) PE=2 SV=1	T	Signal transduction mechanisms	PREDICTED: SPX domain-containing protein 4 [Vitis vinifera]
F01_transcript_65746	--	--	Cellular Component: nucleus (GO:0005634);; Cellular Component: endoplasmic reticulum (GO:0005783);; Biological Process: cellular response to phosphate starvation (GO:0016036);;	--	--	[P]	Inorganic ion transport and metabolism	SPX domain	SPX domain-containing protein 1 GN=SPX1 OS=Arabidopsis thaliana (Mouse-ear cress) PE=2 SV=2	T	Signal transduction mechanisms	PREDICTED: SPX domain-containing protein 1-like [Sesamum indicum]
F01_transcript_93353	--	--	Molecular Function: actin filament binding (GO:0051015);; Biological Process: actin filament bundle assembly (GO:0051017);;	--	--	[Z]	Cytoskeleton	--	Villin-3 {ECO:0000303|PubMed:10631247} OS=Arabidopsis thaliana (Mouse-ear cress) PE=1 SV=2	S	Function unknown	hypothetical protein CARUB_v10018871mg [Capsella rubella]
F01_transcript_107443	--	--	Cellular Component: integral component of membrane (GO:0016021);;	--	--	[G]	Carbohydrate transport and metabolism	--	--	G	Carbohydrate transport and metabolism	PREDICTED: major facilitator superfamily domain-containing protein 12-like [Sesamum indicum]
F01_transcript_38308	--	--	Cellular Component: membrane (GO:0016020);;	--	--	--	--	--	--	S	Function unknown	unnamed protein product [Coffea canephora]
F01_transcript_19797	--	--	Molecular Function: protein dimerization activity (GO:0046983);;	--	--	--	--	Helix-loop-helix DNA-binding domain	Transcription factor bHLH121 GN=MPN9.10 OS=Arabidopsis thaliana (Mouse-ear cress) PE=2 SV=1	K	Transcription	PREDICTED: transcription factor bHLH121 [Sesamum indicum]
F01_transcript_94044	--	--	Cellular Component: plant-type vacuole (GO:0000325);; Molecular Function: voltage-gated ion channel activity (GO:0005244);; Molecular Function: calcium channel activity (GO:0005262);; Molecular Function: calcium ion binding (GO:0005509);; Cellular Component: vacuolar membrane (GO:0005774);; Cellular Component: Golgi apparatus (GO:0005794);; Biological Process: defense response (GO:0006952);; Biol…	K16900|0|vvi:100233073|K16900 two pore calcium channel protein, plant | (RefSeq) TPC1; two pore channel 1	--	[PT]	--	Ion transport protein;; EF-hand domain pair;; EF hand	Two pore calcium channel protein 1A GN=TPC1A OS=Nicotiana tabacum (Common tobacco) PE=2 SV=1	U	Intracellular trafficking, secretion, and vesicular transport	two pore channel 1 [Vitis vinifera]
F01_transcript_57304	--	--	--	--	--	[O]	Posttranslational modification, protein turnover, chaperones	--	--	O	Posttranslational modification, protein turnover, chaperones	PREDICTED: uncharacterized protein LOC103500009 isoform X2 [Cucumis melo]
F01_transcript_17722	--	--	Cellular Component: vacuolar membrane (GO:0005774);;	--	--	--	--	--	--	S	Function unknown	hypothetical protein MIMGU_mgv1a007481mg [Erythranthe guttata]
F01_transcript_108527	[MDT]	--	Molecular Function: ATP binding (GO:0005524);; Cellular Component: nucleus (GO:0005634);; Molecular Function: microtubule-severing ATPase activity (GO:0008568);; Cellular Component: integral component of membrane (GO:0016021);; Biological Process: cytoplasmic microtubule organization (GO:0031122);;	--	--	[O]	Posttranslational modification, protein turnover, chaperones	FHA domain;; ATPase family associated with various cellular activities (AAA);; AAA domain (dynein-related subfamily);; Holliday junction DNA helicase ruvB N-terminus	Katanin p60 ATPase-containing subunit A1 {ECO:0000255|HAMAP-Rule:MF_03023} GN=At1g80350 OS=Arabidopsis thaliana (Mouse-ear cress) PE=1 SV=1	O	Posttranslational modification, protein turnover, chaperones	PREDICTED: uncharacterized protein LOC100266414 isoform X1 [Vitis vinifera]
F01_transcript_96606	--	--	--	--	--	[O]	Posttranslational modification, protein turnover, chaperones	--	--	O	Posttranslational modification, protein turnover, chaperones	unnamed protein product [Coffea canephora]
F01_transcript_134771	--	--	--	K06268|1.16823e-76|vvi:100243294|K06268 serine/threonine-protein phosphatase 2B regulatory subunit | (RefSeq) CBL01; calcineurin B-like protein 1	--	[T]	Signal transduction mechanisms	--	Calcineurin B-like protein 1 OS=Arabidopsis thaliana (Mouse-ear cress) PE=1 SV=3	DTZ	--	calcineurin B-like protein 01 [Vitis vinifera]
F01_transcript_126594	--	--	Molecular Function: signal recognition particle binding (GO:0005047);; Molecular Function: GTP binding (GO:0005525);; Cellular Component: signal recognition particle receptor complex (GO:0005785);; Biological Process: SRP-dependent cotranslational protein targeting to membrane (GO:0006614);; Biological Process: small GTPase mediated signal transduction (GO:0007264);; Cellular Component: integral …	K12272|1.80692e-100|vvi:100265371|K12272 signal recognition particle receptor subunit beta | (RefSeq) signal recognition particle receptor subunit beta	ko03060:Protein export	[U]	Intracellular trafficking, secretion, and vesicular transport	EF hand;; EF-hand domain pair;; EF-hand domain;; EF-hand domain pair;; Signal recognition particle receptor beta subunit;; ADP-ribosylation factor family;; Elongation factor Tu GTP binding domain;; Gtr1/RagA G protein conserved region	Calcineurin B-like protein 7 GN=OJ1086_G08.10 OS=Oryza sativa subsp. japonica (Rice) PE=2 SV=1	S	Function unknown	PREDICTED: signal recognition particle receptor subunit beta-like isoform X1 [Sesamum indicum]
F01_transcript_110356	--	--	Biological Process: RNA processing (GO:0006396);;	K13217|9.87158e-143|vvi:100244562|K13217 pre-mRNA-processing factor 39 | (RefSeq) pre-mRNA-processing factor 39	--	[A]	RNA processing and modification	Tetratricopeptide repeat;; Tetratricopeptide repeat	--	A	RNA processing and modification	unnamed protein product [Coffea canephora]
F01_transcript_92057	--	--	Molecular Function: folic acid binding (GO:0005542);; Biological Process: metabolic process (GO:0008152);; Molecular Function: transferase activity (GO:0016740);;	--	--	--	--	--	--	E	Amino acid transport and metabolism	PREDICTED: formimidoyltransferase-cyclodeaminase [Sesamum indicum]
F01_transcript_34574	--	--	Cellular Component: cytosol (GO:0005829);;	K03626|1.40194e-66|vvi:100854239|K03626 nascent polypeptide-associated complex subunit alpha | (RefSeq) nascent polypeptide-associated complex subunit alpha-like protein 2	--	[K]	Transcription	NAC domain	Nascent polypeptide-associated complex subunit alpha-like protein 2 GN=At3g49470 OS=Arabidopsis thaliana (Mouse-ear cress) PE=2 SV=2	K	Transcription	PREDICTED: nascent polypeptide-associated complex subunit alpha-like protein 2 [Vitis vinifera]
F01_transcript_138715	--	--	Molecular Function: structural constituent of ribosome (GO:0003735);; Biological Process: translation (GO:0006412);; Cellular Component: cytosolic large ribosomal subunit (GO:0022625);;	K02882|9.22869e-25|sly:101245264|K02882 large subunit ribosomal protein L18Ae | (RefSeq) 60S ribosomal protein L18a	ko03010:Ribosome	[J]	Translation, ribosomal structure and biogenesis	Ribosomal proteins 50S-L18Ae/60S-L20/60S-L18A	60S ribosomal protein L18a-2 GN=RPL18AB OS=Arabidopsis thaliana (Mouse-ear cress) PE=2 SV=2	J	Translation, ribosomal structure and biogenesis	PREDICTED: 60S ribosomal protein L18a [Solanum lycopersicum]
F01_transcript_131692	--	--	Molecular Function: binding (GO:0005488);;	--	--	[R]	General function prediction only	Glutathione peroxidase	Endonuclease OS=Nicotiana tabacum (Common tobacco) PE=2 SV=1	S	Function unknown	polyprotein [Gossypium barbadense]
F01_transcript_118984	[I]	Lipid transport and metabolism	Molecular Function: hydroxymethylglutaryl-CoA reductase (NADPH) activity (GO:0004420);; Cellular Component: peroxisomal membrane (GO:0005778);; Cellular Component: endoplasmic reticulum membrane (GO:0005789);; Biological Process: isoprenoid biosynthetic process (GO:0008299);; Biological Process: coenzyme A metabolic process (GO:0015936);; Cellular Component: integral component of membrane (GO:001…	--	--	[I]	Lipid transport and metabolism	Hydroxymethylglutaryl-coenzyme A reductase	3-hydroxy-3-methylglutaryl-coenzyme A reductase 1 GN=HMGR1 OS=Hevea brasiliensis (Para rubber tree) PE=2 SV=1	I	Lipid transport and metabolism	3-hydroxy-3-methylglutaryl coenzyme A reductase [Panax notoginseng]
F01_transcript_83691	--	--	Cellular Component: endoplasmic reticulum membrane (GO:0005789);; Biological Process: lipid transport (GO:0006869);; Molecular Function: lipid binding (GO:0008289);; Cellular Component: integral component of membrane (GO:0016021);; Cellular Component: endoplasmic reticulum tubular network (GO:0071782);; Biological Process: endoplasmic reticulum tubular network organization (GO:0071786);;	--	--	--	--	Probable lipid transfer;; Protease inhibitor/seed storage/LTP family;; Predicted integral membrane zinc-ribbon metal-binding protein	Non-specific lipid-transfer protein-like protein At5g64080 (Precursor) GN=At5g64080 OS=Arabidopsis thaliana (Mouse-ear cress) PE=1 SV=1	S	Function unknown	conserved hypothetical protein [Ricinus communis]
F01_transcript_108283	--	--	Biological Process: formation of translation preinitiation complex (GO:0001731);; Molecular Function: translation initiation factor activity (GO:0003743);; Cellular Component: cytosol (GO:0005829);; Cellular Component: eukaryotic translation initiation factor 3 complex (GO:0005852);; Cellular Component: plasma membrane (GO:0005886);; Biological Process: regulation of translational initiation (GO:…	K03250|0|pvu:PHAVU_007G250100g|K03250 translation initiation factor 3 subunit E | (RefSeq) hypothetical protein	ko03013:RNA transport	[J]	Translation, ribosomal structure and biogenesis	eIF3 subunit 6 N terminal domain;; PCI domain	--	J	Translation, ribosomal structure and biogenesis	hypothetical protein PHAVU_007G250100g [Phaseolus vulgaris]
F01_transcript_119370	--	--	--	--	--	[S]	Function unknown	--	--	S	Function unknown	unnamed protein product [Vitis vinifera]
F01_transcript_98662	[H]	Coenzyme transport and metabolism	Molecular Function: GTPase activity (GO:0003924);; Molecular Function: structural constituent of cytoskeleton (GO:0005200);; Molecular Function: GTP binding (GO:0005525);; Cellular Component: cytoplasm (GO:0005737);; Cellular Component: microtubule (GO:0005874);; Biological Process: microtubule-based process (GO:0007017);;	K07375|0|pop:POPTR_0003s12690g|K07375 tubulin beta | (RefSeq) POPTRDRAFT_646611; hypothetical protein	ko04145:Phagosome	[Z]	Cytoskeleton	Tubulin/FtsZ family, GTPase domain;; Tubulin C-terminal domain;; Glutamate-cysteine ligase family 2(GCS2)	Tubulin beta-3 chain GN=TUBB3 OS=Triticum aestivum (Wheat) PE=2 SV=1	Z	Cytoskeleton	beta tubulin [Panax notoginseng]
F01_transcript_125306	--	--	Molecular Function: nucleotide binding (GO:0000166);; Molecular Function: protein binding (GO:0005515);; Cellular Component: nucleus (GO:0005634);; Cellular Component: cytoplasm (GO:0005737);; Cellular Component: Cul4-RING E3 ubiquitin ligase complex (GO:0080008);;	K11804|5.37439e-154|sot:102585248|K11804 WD repeat-containing protein 42A | (RefSeq) DDB1- and CUL4-associated factor 8-like	--	[R]	General function prediction only	WD domain, G-beta repeat	--	S	Function unknown	PREDICTED: DDB1- and CUL4-associated factor 8-like [Solanum tuberosum]
F01_transcript_16580	[I]	Lipid transport and metabolism	Biological Process: isopentenyl diphosphate biosynthetic process, methylerythritol 4-phosphate pathway (GO:0019288);; Molecular Function: metal ion binding (GO:0046872);; Biological Process: dimethylallyl diphosphate biosynthetic process (GO:0050992);; Molecular Function: 4-hydroxy-3-methylbut-2-en-1-yl diphosphate reductase activity (GO:0051745);; Biological Process: oxidation-reduction process …	K03527|0|vvi:100267479|K03527 4-hydroxy-3-methylbut-2-en-1-yl diphosphate reductase [EC:1.17.7.4] | (RefSeq) 4-hydroxy-3-methylbut-2-enyl diphosphate reductase, chloroplastic	ko00900:Terpenoid backbone biosynthesis	--	--	LytB protein	4-hydroxy-3-methylbut-2-enyl diphosphate reductase, chloroplastic (Precursor) GN=F10M10.120 OS=Arabidopsis thaliana (Mouse-ear cress) PE=2 SV=1	I	Lipid transport and metabolism	hydroxymethylbutenyl diphosphate reductase [Camptotheca acuminata]
F01_transcript_81160	--	--	Molecular Function: dolichyl-phosphate-mannose-glycolipid alpha-mannosyltransferase activity (GO:0004584);; Cellular Component: endoplasmic reticulum membrane (GO:0005789);; Biological Process: GPI anchor biosynthetic process (GO:0006506);; Cellular Component: integral component of membrane (GO:0016021);; Cellular Component: mannosyltransferase complex (GO:0031501);; Biological Process: mannosyla…	K07542|2.49932e-23|vvi:100241567|K07542 phosphatidylinositol glycan, class V [EC:2.4.1.-] | (RefSeq) GPI mannosyltransferase 2	ko00563:Glycosylphosphatidylinositol(GPI)-anchor biosynthesis	[R]	General function prediction only	Mannosyltransferase (PIG-V)	--	S	Function unknown	PREDICTED: GPI mannosyltransferase 2 [Vitis vinifera]
F01_transcript_143283	--	--	Cellular Component: chloroplast (GO:0009507);;	--	--	--	--	--	--	S	Function unknown	hypothetical protein M569_00222, partial [Genlisea aurea]
F01_transcript_82796	--	--	Molecular Function: protein serine/threonine phosphatase activity (GO:0004722);; Biological Process: protein dephosphorylation (GO:0006470);;	--	--	[T]	Signal transduction mechanisms	--	Probable protein phosphatase 2C 73 OS=Arabidopsis thaliana (Mouse-ear cress) PE=2 SV=1	T	Signal transduction mechanisms	PREDICTED: probable protein phosphatase 2C 34 [Sesamum indicum]
F01_transcript_104084	--	--	--	--	--	--	--	--	--	S	Function unknown	PREDICTED: uncharacterized protein LOC103322400 [Prunus mume]
F01_transcript_53501	[G]	Carbohydrate transport and metabolism	Biological Process: carbohydrate transport (GO:0008643);; Cellular Component: chloroplast envelope (GO:0009941);; Cellular Component: integral component of membrane (GO:0016021);; Molecular Function: substrate-specific transmembrane transporter activity (GO:0022891);; Biological Process: transmembrane transport (GO:0055085);;	--	--	[R]	General function prediction only	Sugar (and other) transporter;; Major Facilitator Superfamily	Plastidic glucose transporter 4 GN=At5g16150 OS=Arabidopsis thaliana (Mouse-ear cress) PE=1 SV=2	G	Carbohydrate transport and metabolism	PREDICTED: plastidic glucose transporter 4 isoform X2 [Sesamum indicum]
F01_transcript_127425	--	--	Molecular Function: transporter activity (GO:0005215);; Biological Process: transport (GO:0006810);; Cellular Component: integral component of membrane (GO:0016021);;	K15283|1.36223e-131|eus:EUTSA_v10023518mg|K15283 solute carrier family 35, member E1 | (RefSeq) hypothetical protein	--	[GE]	--	Triose-phosphate Transporter family;; EamA-like transporter family	Glucose-6-phosphate/phosphate translocator 2, chloroplastic (Precursor) GN=GPT2 OS=Arabidopsis thaliana (Mouse-ear cress) PE=2 SV=2	S	Function unknown	hypothetical protein EUTSA_v10023518mg [Eutrema salsugineum]
F01_transcript_42254	[HR]	--	Molecular Function: hydrolase activity (GO:0016787);; Biological Process: cellular metabolic process (GO:0044237);;	K07024|8.86363e-173|sly:543710|K07024 sucrose-6-phosphatase&#160; [EC:3.1.3.24] | (RefSeq) sucrose-phosphatase	--	--	--	Sucrose-6-phosphate phosphohydrolase C-terminal;; Sucrose-6F-phosphate phosphohydrolase	Sucrose-phosphatase 1 GN=SPP1 OS=Nicotiana tabacum (Common tobacco) PE=2 SV=1	S	Function unknown	unnamed protein product [Coffea canephora]
F01_transcript_125878	--	--	--	K12879|7.8311e-16|sly:101261518|K12879 THO complex subunit 2 | (RefSeq) THO complex subunit 2	ko03013:RNA transport;ko03040:Spliceosome	[K]	Transcription	--	THO complex subunit 2 GN=F5A9.21/F5A9.22 OS=Arabidopsis thaliana (Mouse-ear cress) PE=1 SV=1	S	Function unknown	PREDICTED: uncharacterized protein At5g48480 [Nicotiana tomentosiformis]
F01_transcript_122332	--	--	Molecular Function: metal ion binding (GO:0046872);;	--	--	[R]	General function prediction only	Ankyrin repeat;; Ankyrin repeats (many copies);; Ankyrin repeat;; Ankyrin repeats (3 copies)	Zinc finger CCCH domain-containing protein 29 GN=At2g40140 OS=Arabidopsis thaliana (Mouse-ear cress) PE=2 SV=1	S	Function unknown	unnamed protein product [Coffea canephora]
F01_transcript_58358	[T]	Signal transduction mechanisms	Molecular Function: calmodulin-dependent protein kinase activity (GO:0004683);; Molecular Function: ATP binding (GO:0005524);; Biological Process: protein phosphorylation (GO:0006468);;	K07359|0|vvi:100260436|K07359 calcium/calmodulin-dependent protein kinase kinase 2 [EC:2.7.11.17] | (RefSeq) serine/threonine-protein kinase GRIK2	--	[T]	Signal transduction mechanisms	Protein kinase domain;; Protein tyrosine kinase;; Kinase-like	Serine/threonine-protein kinase GRIK2 GN=MUF9.18 OS=Arabidopsis thaliana (Mouse-ear cress) PE=1 SV=1	T	Signal transduction mechanisms	PREDICTED: serine/threonine-protein kinase GRIK2 [Vitis vinifera]
F01_transcript_72385	--	--	Cellular Component: exocyst (GO:0000145);; Cellular Component: cytosol (GO:0005829);; Cellular Component: plasma membrane (GO:0005886);; Biological Process: vesicle docking involved in exocytosis (GO:0006904);; Cellular Component: plasmodesma (GO:0009506);; Biological Process: protein transport (GO:0015031);; Biological Process: mucilage biosynthetic process involved in seed coat development (GO:…	K06111|0|vvi:100253015|K06111 exocyst complex component 4 | (RefSeq) exocyst complex component SEC8	--	--	--	Sec8 exocyst complex component specific domain;; Vacuolar-sorting protein 54, of GARP complex	Exocyst complex component SEC8 GN=SEC8 OS=Arabidopsis thaliana (Mouse-ear cress) PE=1 SV=1	U	Intracellular trafficking, secretion, and vesicular transport	PREDICTED: exocyst complex component SEC8 [Vitis vinifera]
F01_transcript_1241	[R]	General function prediction only	Molecular Function: peptide alpha-N-acetyltransferase activity (GO:0004596);; Cellular Component: cytoplasm (GO:0005737);; Biological Process: N-terminal peptidyl-methionine acetylation (GO:0017196);;	--	--	[B]	Chromatin structure and dynamics	NMDA receptor-regulated protein 1;; Tetratricopeptide repeat;; Tetratricopeptide repeat;; Tetratricopeptide repeat;; TPR repeat;; Tetratricopeptide repeat;; Tetratricopeptide repeat;; Tetratricopeptide repeat;; Tetratricopeptide repeat;; Tetratricopeptide repeat;; Tetratricopeptide repeat	--	S	Function unknown	hypothetical protein JCGZ_06237 [Jatropha curcas]
F01_transcript_105647	[E]	Amino acid transport and metabolism	Molecular Function: glutamate-ammonia ligase activity (GO:0004356);; Molecular Function: ATP binding (GO:0005524);; Cellular Component: cytoplasm (GO:0005737);; Biological Process: glutamine biosynthetic process (GO:0006542);; Biological Process: nitrogen fixation (GO:0009399);;	K01915|5.37637e-149|csv:101221473|K01915 glutamine synthetase [EC:6.3.1.2] | (RefSeq) GS1; glutamine synthetase cytosolic isozyme-like	ko00220:Arginine biosynthesis;ko00250:Alanine, aspartate and glutamate metabolism;ko00630:Glyoxylate and dicarboxylate metabolism;ko00910:Nitrogen metabolism;ko01230:Biosynthesis of amino acids	[E]	Amino acid transport and metabolism	Glutamine synthetase, beta-Grasp domain;; Glutamine synthetase, catalytic domain	Glutamine synthetase cytosolic isozyme 1 GN=GS1-1 OS=Vitis vinifera (Grape) PE=2 SV=1	E	Amino acid transport and metabolism	PREDICTED: glutamine synthetase nodule isozyme [Nelumbo nucifera]
F01_transcript_82945	--	--	Molecular Function: chaperone binding (GO:0051087);;	--	--	[T]	Signal transduction mechanisms	Exostosin family	BAG family molecular chaperone regulator 1 GN=BAG1 OS=Arabidopsis thaliana (Mouse-ear cress) PE=1 SV=1	O	Posttranslational modification, protein turnover, chaperones	PREDICTED: BAG family molecular chaperone regulator 3-like [Solanum lycopersicum]
F01_transcript_120843	[M]	Cell wall/membrane/envelope biogenesis	Molecular Function: calmodulin-dependent protein kinase activity (GO:0004683);; Molecular Function: calcium ion binding (GO:0005509);; Molecular Function: calmodulin binding (GO:0005516);; Molecular Function: ATP binding (GO:0005524);; Cellular Component: nucleus (GO:0005634);; Cellular Component: cytoplasm (GO:0005737);; Cellular Component: plasma membrane (GO:0005886);; Biological Process: absc…	K13412|0|sly:101249955|K13412 calcium-dependent protein kinase [EC:2.7.11.1] | (RefSeq) calcium-dependent protein kinase 13	ko04626:Plant-pathogen interaction	[T]	Signal transduction mechanisms	Protein kinase domain;; EF hand;; EF-hand domain pair;; Protein tyrosine kinase;; EF-hand domain;; EF hand;; EF-hand domain pair;; Secreted protein acidic and rich in cysteine Ca binding region;; Cytoskeletal-regulatory complex EF hand	Calcium-dependent protein kinase 13 GN=CPK13 OS=Arabidopsis thaliana (Mouse-ear cress) PE=1 SV=2	T	Signal transduction mechanisms	unnamed protein product [Coffea canephora]
F01_transcript_58201	--	--	Molecular Function: structural constituent of ribosome (GO:0003735);; Molecular Function: iron ion binding (GO:0005506);; Cellular Component: ribosome (GO:0005840);; Biological Process: translation (GO:0006412);; Cellular Component: chloroplast envelope (GO:0009941);; Molecular Function: zeinoxanthin epsilon hydroxylase activity (GO:0009974);; Biological Process: carotenoid biosynthetic process (…	K09837|2.94654e-81|tcc:TCM_022349|K09837 carotene epsilon-monooxygenase [EC:1.14.99.45] | (RefSeq) Cytochrome P450 superfamily protein isoform 1	ko00906:Carotenoid biosynthesis	[QI]	--	Cytochrome P450	Carotene epsilon-monooxygenase, chloroplastic (Precursor) GN=T4D2.60 OS=Arabidopsis thaliana (Mouse-ear cress) PE=1 SV=1	Q	Secondary metabolites biosynthesis, transport and catabolism	putative epsilon-ring carotene hydroxylase [Daucus carota subsp. sativus]
F01_transcript_144596	[CP]	--	Molecular Function: magnesium ion binding (GO:0000287);; Molecular Function: inorganic diphosphatase activity (GO:0004427);; Cellular Component: cytoplasm (GO:0005737);; Biological Process: phosphate-containing compound metabolic process (GO:0006796);; Cellular Component: integral component of membrane (GO:0016021);;	K01507|1.37268e-107|sot:102585875|K01507 inorganic pyrophosphatase [EC:3.6.1.1] | (RefSeq) soluble inorganic pyrophosphatase 1	ko00190:Oxidative phosphorylation	[C]	Energy production and conversion	Inorganic pyrophosphatase	Soluble inorganic pyrophosphatase GN=PPA OS=Solanum tuberosum (Potato) PE=2 SV=1	C	Energy production and conversion	PREDICTED: soluble inorganic pyrophosphatase-like [Solanum tuberosum]
F01_transcript_128677	--	--	Molecular Function: binding (GO:0005488);; Cellular Component: plastid (GO:0009536);; Cellular Component: integral component of membrane (GO:0016021);;	--	--	--	--	--	Plastid division protein PDV2 GN=PDV2 OS=Arabidopsis thaliana (Mouse-ear cress) PE=1 SV=1	S	Function unknown	PREDICTED: plastid division protein PDV2 [Nicotiana sylvestris]
F01_transcript_30495	[O]	Posttranslational modification, protein turnover, chaperones	--	K13993|2.24443e-41|cic:CICLE_v10009756mg|K13993 HSP20 family protein | (RefSeq) hypothetical protein	ko04141:Protein processing in endoplasmic reticulum	[O]	Posttranslational modification, protein turnover, chaperones	Hsp20/alpha crystallin family	17.3 kDa class II heat shock protein OS=Solanum peruvianum (Peruvian tomato) PE=2 SV=1	O	Posttranslational modification, protein turnover, chaperones	PREDICTED: 17.9 kDa class II heat shock protein-like [Populus euphratica]
F01_transcript_2975	[O]	Posttranslational modification, protein turnover, chaperones	Molecular Function: ATP binding (GO:0005524);; Molecular Function: microtubule-severing ATPase activity (GO:0008568);; Biological Process: cell division (GO:0051301);;	--	--	[O]	Posttranslational modification, protein turnover, chaperones	ATPase family associated with various cellular activities (AAA);; Cell division protein 48 (CDC48), N-terminal domain;; Holliday junction DNA helicase ruvB N-terminus;; Cell division protein 48 (CDC48), domain 2;; AAA domain (Cdc48 subfamily);; AAA ATPase domain;; AAA domain;; AAA domain (dynein-related subfamily);; AAA domain;; AAA domain;; TIP49 C-terminus;; AAA domain;; RNA helicase;; Magnesiu…	Cell division cycle protein 48 homolog GN=CDC48 OS=Glycine max (Soybean) PE=1 SV=1	O	Posttranslational modification, protein turnover, chaperones	Transitional endoplasmic reticulum ATPase, putative [Ricinus communis]
F01_transcript_51513	--	--	Cellular Component: cytosol (GO:0005829);; Biological Process: regulation of signal transduction (GO:0009966);; Biological Process: regulation of phosphoprotein phosphatase activity (GO:0034047);; Molecular Function: protein phosphatase 2A binding (GO:0051721);;	K17606|4.51721e-42|vvi:100267623|K17606 immunoglobulin-binding protein 1 | (RefSeq) PP2A regulatory subunit TAP46	--	[T]	Signal transduction mechanisms	Magnesium transporter NIPA;; TAP42-like family	PP2A regulatory subunit TAP46 GN=TAP46 OS=Arabidopsis thaliana (Mouse-ear cress) PE=1 SV=2	S	Function unknown	PREDICTED: PP2A regulatory subunit TAP46-like [Nicotiana tomentosiformis]
F01_transcript_143800	[J]	Translation, ribosomal structure and biogenesis	--	--	--	[BK]	--	Macro domain;; Divergent CRAL/TRIO domain	--	S	Function unknown	unnamed protein product [Coffea canephora]
F01_transcript_47868	--	--	Molecular Function: electron carrier activity (GO:0009055);; Cellular Component: anchored component of plasma membrane (GO:0046658);;	--	--	--	--	Plastocyanin-like domain	Basic blue protein OS=Cucumis sativus (Cucumber) PE=1 SV=1	S	Function unknown	Copper binding protein 6 [Theobroma cacao]
F01_transcript_37124	--	--	Molecular Function: iron ion binding (GO:0005506);; Cellular Component: integral component of membrane (GO:0016021);; Molecular Function: oxidoreductase activity, acting on paired donors, with incorporation or reduction of molecular oxygen (GO:0016705);; Molecular Function: L-ascorbic acid binding (GO:0031418);; Biological Process: oxidation-reduction process (GO:0055114);;	K00472|2.89913e-15|sot:102579923|K00472 prolyl 4-hydroxylase [EC:1.14.11.2] | (RefSeq) probable prolyl 4-hydroxylase 10	ko00330:Arginine and proline metabolism	[E]	Amino acid transport and metabolism	--	Probable prolyl 4-hydroxylase 10 (Precursor) GN=P4H10 OS=Arabidopsis thaliana (Mouse-ear cress) PE=2 SV=1	S	Function unknown	PREDICTED: prolyl 4-hydroxylase subunit alpha-1-like [Solanum tuberosum]
F01_transcript_47275	--	--	Molecular Function: metal ion binding (GO:0046872);;	--	--	[P]	Inorganic ion transport and metabolism	Metallothionein	Metallothionein-like protein 1 OS=Erythranthe guttata (Yellow monkey flower) PE=3 SV=1	S	Function unknown	PREDICTED: metallothionein-like protein 1 [Sesamum indicum]
F01_transcript_37597	[E]	Amino acid transport and metabolism	Biological Process: arginine catabolic process (GO:0006527);; Biological Process: spermidine biosynthetic process (GO:0008295);; Molecular Function: arginine decarboxylase activity (GO:0008792);;	--	--	--	--	--	Arginine decarboxylase OS=Pisum sativum (Garden pea) PE=2 SV=1	E	Amino acid transport and metabolism	arginine decarboxylase [Daucus carota]
F01_transcript_137148	[J]	Translation, ribosomal structure and biogenesis	Molecular Function: nucleotide binding (GO:0000166);; Biological Process: spliceosomal complex assembly (GO:0000245);; Molecular Function: RNA binding (GO:0003723);; Cellular Component: Cajal body (GO:0015030);; Cellular Component: viral nucleocapsid (GO:0019013);; Cellular Component: intracellular ribonucleoprotein complex (GO:0030529);;	K13161|0|sot:102604470|K13161 heterogeneous nuclear ribonucleoprotein R | (RefSeq) heterogeneous nuclear ribonucleoprotein Q	--	[A]	RNA processing and modification	RNA recognition motif. (a.k.a. RRM, RBD, or RNP domain)	Polyadenylate-binding protein 4 GN=PAB4 OS=Arabidopsis thaliana (Mouse-ear cress) PE=1 SV=1	S	Function unknown	PREDICTED: heterogeneous nuclear ribonucleoprotein Q-like isoform X3 [Solanum tuberosum]
F01_transcript_91035	--	--	--	--	--	--	--	Domain of unknown function (DUF1338);; Domain of unknown function (DUF1338)	--	S	Function unknown	PREDICTED: uncharacterized protein LOC100258620 isoform X2 [Vitis vinifera]
F01_transcript_136137	--	--	Biological Process: ubiquitin-dependent protein catabolic process (GO:0006511);; Molecular Function: kinase activity (GO:0016301);; Biological Process: phosphorylation (GO:0016310);;	K03094|1.44791e-28|tcc:TCM_000157|K03094 S-phase kinase-associated protein 1 | (RefSeq) S phase kinase-associated protein 1	ko04120:Ubiquitin mediated proteolysis;ko04141:Protein processing in endoplasmic reticulum	[O]	Posttranslational modification, protein turnover, chaperones	Skp1 family, tetramerisation domain	SKP1-like protein 4 GN=ASK4 OS=Arabidopsis thaliana (Mouse-ear cress) PE=1 SV=1	O	Posttranslational modification, protein turnover, chaperones	hypothetical protein EUGRSUZ_J02478 [Eucalyptus grandis]
F01_transcript_35218	[J]	Translation, ribosomal structure and biogenesis	Molecular Function: structural constituent of ribosome (GO:0003735);; Cellular Component: nucleolus (GO:0005730);; Biological Process: translation (GO:0006412);; Cellular Component: integral component of membrane (GO:0016021);; Cellular Component: cytosolic large ribosomal subunit (GO:0022625);; Molecular Function: large ribosomal subunit rRNA binding (GO:0070180);;	K02894|1.84328e-81|sot:102577734|K02894 large subunit ribosomal protein L23e | (RefSeq) ribosomal protein L17-like protein	ko03010:Ribosome	[J]	Translation, ribosomal structure and biogenesis	Ribosomal protein L14p/L23e	60S ribosomal protein L23 GN=T27C4.4 OS=Arabidopsis thaliana (Mouse-ear cress) PE=2 SV=3	J	Translation, ribosomal structure and biogenesis	ribosomal protein L17-like protein [Solanum tuberosum]
F01_transcript_143352	--	--	--	--	--	[R]	General function prediction only	Zinc finger C-x8-C-x5-C-x3-H type (and similar)	Zinc finger CCCH domain-containing protein 49 GN=At4g29190 OS=Arabidopsis thaliana (Mouse-ear cress) PE=2 SV=1	S	Function unknown	PREDICTED: zinc finger CCCH domain-containing protein 23 [Vitis vinifera]
F01_transcript_6915	--	--	Biological Process: transcription, DNA-templated (GO:0006351);;	--	--	--	--	AP2 domain	Ethylene-responsive transcription factor ERF110 GN=ERF110 OS=Arabidopsis thaliana (Mouse-ear cress) PE=2 SV=2	K	Transcription	ERF transcription factor 13 [Coffea arabica]
F01_transcript_139117	--	--	Molecular Function: serine-type carboxypeptidase activity (GO:0004185);; Cellular Component: vacuole (GO:0005773);; Biological Process: proteolysis (GO:0006508);; Molecular Function: dipeptidyl-peptidase activity (GO:0008239);; Cellular Component: chloroplast (GO:0009507);; Cellular Component: membrane (GO:0016020);;	K01285|3.26193e-41|vvi:100261134|K01285 lysosomal Pro-X carboxypeptidase [EC:3.4.16.2] | (RefSeq) lysosomal Pro-X carboxypeptidase	--	[OR]	--	Serine carboxypeptidase S28	--	S	Function unknown	unnamed protein product [Coffea canephora]
F01_transcript_117467	--	--	--	--	--	[R]	General function prediction only	DYW family of nucleic acid deaminases	Pentatricopeptide repeat-containing protein At1g04840 GN=PCMP-H64 OS=Arabidopsis thaliana (Mouse-ear cress) PE=2 SV=1	S	Function unknown	unnamed protein product [Coffea canephora]
F01_transcript_44319	[M]	Cell wall/membrane/envelope biogenesis	Molecular Function: ATP binding (GO:0005524);; Biological Process: protein phosphorylation (GO:0006468);; Molecular Function: RNA polymerase II carboxy-terminal domain kinase activity (GO:0008353);;	K08819|0|vvi:100263383|K08819 cyclin-dependent kinase 12/13 [EC:2.7.11.22 2.7.11.23] | (RefSeq) cyclin-dependent kinase C-2	--	[D]	Cell cycle control, cell division, chromosome partitioning	Protein kinase domain;; Protein tyrosine kinase	Cyclin-dependent kinase C-1 GN=OJ1562_H01.5 OS=Oryza sativa subsp. japonica (Rice) PE=2 SV=1	T	Signal transduction mechanisms	PREDICTED: cyclin-dependent kinase C-2-like [Vitis vinifera]
F01_transcript_127436	--	--	Cellular Component: integral component of membrane (GO:0016021);;	--	--	--	--	--	Uncharacterized membrane protein At3g27390 GN=At3g27390 OS=Arabidopsis thaliana (Mouse-ear cress) PE=1 SV=2	S	Function unknown	conserved hypothetical protein [Ricinus communis]
F01_transcript_94509	--	--	--	K11674|3.51517e-99|vvi:100254089|K11674 microspherule protein 1 | (RefSeq) uncharacterized LOC100254089	--	[KT]	--	N-terminal region of micro-spherule protein	--	T	Signal transduction mechanisms	unnamed protein product [Coffea canephora]
F01_transcript_83508	--	--	--	--	--	[R]	General function prediction only	PPR repeat;; PPR repeat;; PPR repeat family	Pentatricopeptide repeat-containing protein At2g21090 GN=PCMP-E48 OS=Arabidopsis thaliana (Mouse-ear cress) PE=2 SV=1	S	Function unknown	unnamed protein product [Coffea canephora]
F01_transcript_42054	[C]	Energy production and conversion	Molecular Function: succinate-CoA ligase (ADP-forming) activity (GO:0004775);; Molecular Function: ATP binding (GO:0005524);; Molecular Function: lyase activity (GO:0016829);;	K01648|0|sot:102595393|K01648 ATP citrate (pro-S)-lyase [EC:2.3.3.8] | (RefSeq) ATP-citrate synthase alpha chain protein 2	ko00020:Citrate cycle (TCA cycle)	[C]	Energy production and conversion	ATP citrate lyase citrate-binding;; ATP-grasp domain	ATP-citrate synthase alpha chain protein 1 GN=ACLA-1 OS=Arabidopsis thaliana (Mouse-ear cress) PE=1 SV=1	C	Energy production and conversion	PREDICTED: ATP-citrate synthase alpha chain protein 2-like [Nicotiana sylvestris]
F01_transcript_63459	--	--	Molecular Function: iron ion binding (GO:0005506);; Molecular Function: dioxygenase activity (GO:0051213);; Biological Process: oxidation-reduction process (GO:0055114);;	--	--	[QR]	--	--	Thebaine 6-O-demethylase GN=T6ODM OS=Papaver somniferum (Opium poppy) PE=1 SV=1	S	Function unknown	Leucoanthocyanidin dioxygenase [Glycine soja]
F01_transcript_23192	--	--	Cellular Component: mitochondrion (GO:0005739);; Cellular Component: endoplasmic reticulum membrane (GO:0005789);; Cellular Component: integral component of membrane (GO:0016021);;	--	--	[U]	Intracellular trafficking, secretion, and vesicular transport	Reticulon	Reticulon-like protein B8 GN=RTNLB8 OS=Arabidopsis thaliana (Mouse-ear cress) PE=2 SV=1	U	Intracellular trafficking, secretion, and vesicular transport	PREDICTED: reticulon-like protein B8 [Vitis vinifera]
F01_transcript_25929	[T]	Signal transduction mechanisms	Cellular Component: mitochondrion (GO:0005739);; Biological Process: cell redox homeostasis (GO:0045454);; Molecular Function: cobalt ion binding (GO:0050897);;	--	--	--	--	CBS domain	CBS domain-containing protein CBSX3, mitochondrial (Precursor) GN=CBSX3 OS=Arabidopsis thaliana (Mouse-ear cress) PE=1 SV=1	S	Function unknown	PREDICTED: CBS domain-containing protein CBSX3, mitochondrial [Nicotiana tomentosiformis]
F01_transcript_97986	--	--	Cellular Component: integral component of membrane (GO:0016021);;	--	--	--	--	--	--	S	Function unknown	conserved hypothetical protein [Ricinus communis]
F01_transcript_142613	--	--	Cellular Component: Golgi membrane (GO:0000139);; Molecular Function: sugar:proton symporter activity (GO:0005351);; Cellular Component: endosome (GO:0005768);; Cellular Component: trans-Golgi network (GO:0005802);; Biological Process: carbohydrate transport (GO:0008643);; Biological Process: proton transport (GO:0015992);; Cellular Component: integral component of membrane (GO:0016021);;	K15272|5.27358e-36|cam:101500177|K15272 solute carrier family 35 (UDP-sugar transporter), member A1/2/3 | (RefSeq) CMP-sialic acid transporter 4	--	[P]	Inorganic ion transport and metabolism	Nucleotide-sugar transporter	CMP-sialic acid transporter 4 OS=Arabidopsis thaliana (Mouse-ear cress) PE=2 SV=1	EG	--	CMP-sialic acid transporter 4 [Morus notabilis]
F01_transcript_39526	--	--	--	--	--	--	--	--	Cinnamyl alcohol dehydrogenase 7 GN=At4g37980 OS=Arabidopsis thaliana (Mouse-ear cress) PE=1 SV=2	C	Energy production and conversion	alcohol dehydrogenase, putative [Ricinus communis]
F01_transcript_11328	--	--	Cellular Component: Golgi apparatus (GO:0005794);; Cellular Component: integral component of membrane (GO:0016021);;	--	--	[S]	Function unknown	Lung seven transmembrane receptor	--	S	Function unknown	ptm1, putative [Ricinus communis]
F01_transcript_44398	--	--	Cellular Component: plasma membrane (GO:0005886);;	--	--	--	--	--	Uncharacterized protein At1g76660 GN=At1g76660 OS=Arabidopsis thaliana (Mouse-ear cress) PE=2 SV=1	S	Function unknown	PREDICTED: uncharacterized protein At1g76660 isoform X1 [Vitis vinifera]
F01_transcript_36007	--	--	Cellular Component: ubiquitin ligase complex (GO:0000151);; Biological Process: protein polyubiquitination (GO:0000209);; Cellular Component: cytoplasm (GO:0005737);; Molecular Function: ubiquitin conjugating enzyme binding (GO:0031624);; Biological Process: positive regulation of proteasomal ubiquitin-dependent protein catabolic process (GO:0032436);; Biological Process: protein ubiquitination i…	--	--	[O]	Posttranslational modification, protein turnover, chaperones	IBR domain, a half RING-finger domain	Probable E3 ubiquitin-protein ligase ARI3 GN=ARI3 OS=Arabidopsis thaliana (Mouse-ear cress) PE=2 SV=1	S	Function unknown	PREDICTED: probable E3 ubiquitin-protein ligase RNF217 [Nicotiana tomentosiformis]
F01_transcript_108756	[T]	Signal transduction mechanisms	Molecular Function: protein kinase activity (GO:0004672);; Molecular Function: ATP binding (GO:0005524);; Biological Process: transcription, DNA-templated (GO:0006351);; Biological Process: protein phosphorylation (GO:0006468);; Cellular Component: chloroplast (GO:0009507);; Cellular Component: integral component of membrane (GO:0016021);; Molecular Function: ligase activity (GO:0016874);; Molecu…	--	--	[T]	Signal transduction mechanisms	Protein tyrosine kinase;; Protein kinase domain	E3 ubiquitin-protein ligase KEG GN=KEG OS=Arabidopsis thaliana (Mouse-ear cress) PE=1 SV=2	T	Signal transduction mechanisms	PREDICTED: E3 ubiquitin-protein ligase KEG isoform X1 [Vitis vinifera]
F01_transcript_22688	[Q]	Secondary metabolites biosynthesis, transport and catabolism	Molecular Function: iron ion binding (GO:0005506);; Biological Process: cellular response to starvation (GO:0009267);; Molecular Function: flavonol synthase activity (GO:0045431);; Biological Process: flavonol biosynthetic process (GO:0051555);; Biological Process: oxidation-reduction process (GO:0055114);;	--	--	[QR]	--	non-haem dioxygenase in morphine synthesis N-terminal;; 2OG-Fe(II) oxygenase superfamily	Probable 2-oxoglutarate-dependent dioxygenase At3g49630 GN=At3g50210 OS=Arabidopsis thaliana (Mouse-ear cress) PE=2 SV=1	S	Function unknown	2-oxoglutarate (2OG) and Fe(II)-dependent oxygenase superfamily protein isoform 1 [Theobroma cacao]
F01_transcript_17669	[R]	General function prediction only	--	--	--	[S]	Function unknown	WD domain, G-beta repeat;; Anaphase-promoting complex subunit 4 WD40 domain	Probable cytosolic iron-sulfur protein assembly protein CIAO1 homolog {ECO:0000255|HAMAP-Rule:MF_03037} GN=CHLREDRAFT_130093 OS=Chlamydomonas reinhardtii (Chlamydomonas smithii) PE=3 SV=1	S	Function unknown	Transducin family protein / WD-40 repeat family protein isoform 1 [Theobroma cacao]
F01_transcript_57395	[K]	Transcription	Biological Process: activation of MAPKK activity (GO:0000186);; Molecular Function: MAP kinase kinase kinase activity (GO:0004709);; Molecular Function: ATP binding (GO:0005524);; Cellular Component: intracellular (GO:0005622);; Cellular Component: integral component of membrane (GO:0016021);; Molecular Function: 2-alkenal reductase [NAD(P)] activity (GO:0032440);; Biological Process: oxidation-r…	--	--	--	--	Protein kinase domain;; Protein tyrosine kinase;; Leucine rich repeat;; Leucine Rich repeats (2 copies);; Leucine Rich Repeat;; Leucine Rich repeat;; Leucine rich repeat N-terminal domain	Receptor-like protein kinase HSL1 (Precursor) GN=HSL1 OS=Arabidopsis thaliana (Mouse-ear cress) PE=2 SV=1	S	Function unknown	Receptor-like protein kinase HSL1 [Morus notabilis]
F01_transcript_115712	[B]	Chromatin structure and dynamics	--	--	--	[K]	Transcription	SWIB/MDM2 domain	--	B	Chromatin structure and dynamics	PREDICTED: upstream activation factor subunit UAF30-like [Pyrus x bretschneideri]
F01_transcript_61262	[J]	Translation, ribosomal structure and biogenesis	Biological Process: enzyme-directed rRNA 2'-O-methylation (GO:0000453);; Molecular Function: RNA binding (GO:0003723);; Molecular Function: rRNA (guanosine-2'-O-)-methyltransferase activity (GO:0070039);;	K15507|0|vvi:100242436|K15507 21S rRNA (GM2251-2'-O)-methyltransferase [EC:2.1.1.-] | (RefSeq) uncharacterized LOC100242436	--	[A]	RNA processing and modification	SpoU rRNA Methylase family;; RNA 2'-O ribose methyltransferase substrate binding	--	J	Translation, ribosomal structure and biogenesis	PREDICTED: rRNA methyltransferase 1, mitochondrial [Nicotiana tomentosiformis]
F01_transcript_4556	--	--	Cellular Component: integral component of membrane (GO:0016021);;	K17086|0|vvi:100259978|K17086 transmembrane 9 superfamily member 2/4 | (RefSeq) transmembrane 9 superfamily member 7	--	[U]	Intracellular trafficking, secretion, and vesicular transport	Endomembrane protein 70	Transmembrane 9 superfamily member 7 {ECO:0000305} (Precursor) OS=Arabidopsis thaliana (Mouse-ear cress) PE=2 SV=1	S	Function unknown	unnamed protein product [Coffea canephora]
F01_transcript_18813	--	--	--	--	--	--	--	Pollen proteins Ole e I like	Major pollen allergen Lol p 11 OS=Lolium perenne (Perennial ryegrass) PE=1 SV=1	S	Function unknown	PREDICTED: vegetative cell wall protein gp1-like [Sesamum indicum]
F01_transcript_24272	--	--	Cellular Component: endoplasmic reticulum (GO:0005783);; Biological Process: protein retention in ER lumen (GO:0006621);; Cellular Component: integral component of membrane (GO:0016021);; Molecular Function: ER retention sequence binding (GO:0046923);;	K10949|1.65701e-156|vvi:100265497|K10949 ER lumen protein retaining receptor | (RefSeq) putative ER lumen protein-retaining receptor C28H8.4	--	[U]	Intracellular trafficking, secretion, and vesicular transport	ER lumen protein retaining receptor	ER lumen protein-retaining receptor B GN=ERD2B OS=Arabidopsis thaliana (Mouse-ear cress) PE=1 SV=1	U	Intracellular trafficking, secretion, and vesicular transport	PREDICTED: putative ER lumen protein-retaining receptor C28H8.4 [Vitis vinifera]
F01_transcript_137678	[E]	Amino acid transport and metabolism	Cellular Component: cytosol (GO:0005829);; Biological Process: glycine biosynthetic process (GO:0006545);; Biological Process: threonine catabolic process (GO:0006567);; Molecular Function: L-allo-threonine aldolase activity (GO:0008732);;	--	--	[E]	Amino acid transport and metabolism	Beta-eliminating lyase;; DegT/DnrJ/EryC1/StrS aminotransferase family	Probable low-specificity L-threonine aldolase 1 GN=THA1 OS=Arabidopsis thaliana (Mouse-ear cress) PE=1 SV=1	E	Amino acid transport and metabolism	Threonine aldolase 1 isoform 6 [Theobroma cacao]
F01_transcript_45933	--	--	--	--	--	--	--	C1 domain;; C1 domain	--	S	Function unknown	unnamed protein product [Coffea canephora]
F01_transcript_107242	[K]	Transcription	--	--	--	[R]	General function prediction only	Leucine Rich repeat;; Leucine rich repeat;; Leucine Rich repeats (2 copies);; Leucine Rich repeat	--	S	Function unknown	PREDICTED: F-box/LRR-repeat protein 14 [Sesamum indicum]
F01_transcript_136035	--	--	Molecular Function: protein kinase activity (GO:0004672);; Molecular Function: ATP binding (GO:0005524);; Biological Process: protein phosphorylation (GO:0006468);;	--	--	[T]	Signal transduction mechanisms	Protein tyrosine kinase;; Protein tyrosine kinase;; Protein kinase domain	Probable serine/threonine-protein kinase NAK GN=NAK OS=Arabidopsis thaliana (Mouse-ear cress) PE=1 SV=2	T	Signal transduction mechanisms	hypothetical protein MIMGU_mgv1a003914mg [Erythranthe guttata]
F01_transcript_19084	--	--	Cellular Component: Elongator holoenzyme complex (GO:0033588);;	K11375|0|pop:POPTR_0010s19680g|K11375 elongator complex protein 4 | (RefSeq) POPTRDRAFT_567278; Paxneb family protein	--	[BK]	--	PAXNEB protein	Elongator complex protein 4 GN=F11B9.14 OS=Arabidopsis thaliana (Mouse-ear cress) PE=1 SV=1	K	Transcription	Elongator complex 4 [Gossypium arboreum]
F01_transcript_59230	--	--	Molecular Function: RNA binding (GO:0003723);; Cellular Component: nucleus (GO:0005634);; Cellular Component: cytoplasm (GO:0005737);; Biological Process: mRNA processing (GO:0006397);;	K12839|5.16179e-78|pper:PRUPE_ppa009157mg|K12839 survival of motor neuron-related-splicing factor 30 | (RefSeq) hypothetical protein	ko03040:Spliceosome	[A]	RNA processing and modification	--	--	A	RNA processing and modification	hypothetical protein PRUPE_ppa009157mg [Prunus persica]
F01_transcript_39495	[G]	Carbohydrate transport and metabolism	Molecular Function: alpha,alpha-trehalose-phosphate synthase (UDP-forming) activity (GO:0003825);; Molecular Function: trehalose-phosphatase activity (GO:0004805);; Biological Process: trehalose biosynthetic process (GO:0005992);; Biological Process: dephosphorylation (GO:0016311);;	K16055|0|fve:101291216|K16055 trehalose 6-phosphate synthase/phosphatase [EC:2.4.1.15 3.1.3.12] | (RefSeq) alpha,alpha-trehalose-phosphate synthase [UDP-forming] 1	ko00500:Starch and sucrose metabolism	[G]	Carbohydrate transport and metabolism	Trehalose-phosphatase;; Glycosyltransferase family 20;; Glycosyltransferase family 20;; Glycosyltransferase family 20	Alpha,alpha-trehalose-phosphate synthase [UDP-forming] 1 GN=TPS1 OS=Arabidopsis thaliana (Mouse-ear cress) PE=1 SV=1	G	Carbohydrate transport and metabolism	PREDICTED: alpha,alpha-trehalose-phosphate synthase [UDP-forming] 1 [Eucalyptus grandis]
F01_transcript_73894	[KL]	--	Molecular Function: ATP binding (GO:0005524);; Cellular Component: nucleus (GO:0005634);; Cellular Component: cytosol (GO:0005829);; Biological Process: regulation of transcription, DNA-templated (GO:0006355);; Biological Process: flower development (GO:0009908);; Biological Process: regulation of ethylene-activated signaling pathway (GO:0010104);; Biological Process: organ boundary specification…	--	--	[BK]	--	--	Chromatin structure-remodeling complex protein SYD GN=SYD OS=Arabidopsis thaliana (Mouse-ear cress) PE=1 SV=1	L	Replication, recombination and repair	Chromatin structure-remodeling complex subunit snf21, partial [Glycine soja]
F01_transcript_28081	[T]	Signal transduction mechanisms	Cellular Component: plasma membrane (GO:0005886);; Biological Process: response to stress (GO:0006950);; Cellular Component: plasmodesma (GO:0009506);; Molecular Function: hydrolase activity (GO:0016787);;	--	--	--	--	Universal stress protein family	Universal stress protein A-like protein GN=At3g01520 OS=Arabidopsis thaliana (Mouse-ear cress) PE=1 SV=2	T	Signal transduction mechanisms	PREDICTED: universal stress protein A-like protein [Nicotiana sylvestris]
F01_transcript_51175	--	--	Molecular Function: protein serine/threonine phosphatase activity (GO:0004722);; Cellular Component: plasma membrane (GO:0005886);; Biological Process: protein dephosphorylation (GO:0006470);; Molecular Function: metal ion binding (GO:0046872);;	--	--	[T]	Signal transduction mechanisms	Protein phosphatase 2C	Probable protein phosphatase 2C 35 GN=At3g06270 OS=Arabidopsis thaliana (Mouse-ear cress) PE=2 SV=1	T	Signal transduction mechanisms	unnamed protein product [Coffea canephora]
F01_transcript_66288	--	--	--	--	--	--	--	--	--	--	--	hypothetical protein SDM1_55t00005 [Solanum demissum]
F01_transcript_84486	[J]	Translation, ribosomal structure and biogenesis	Molecular Function: endoribonuclease activity, producing 5'-phosphomonoesters (GO:0016891);; Biological Process: tRNA 3'-trailer cleavage (GO:0042779);; Biological Process: RNA phosphodiester bond hydrolysis, endonucleolytic (GO:0090502);;	K00784|0|pper:PRUPE_ppa000849mg|K00784 ribonuclease Z [EC:3.1.26.11] | (RefSeq) hypothetical protein	ko03013:RNA transport	[R]	General function prediction only	tRNase Z endonuclease	--	S	Function unknown	PREDICTED: zinc phosphodiesterase ELAC protein 2 [Vitis vinifera]
F01_transcript_129101	--	--	--	--	--	[R]	General function prediction only	FHA domain	--	T	Signal transduction mechanisms	PREDICTED: kanadaptin [Vitis vinifera]
F01_transcript_129259	--	--	--	K12604|4.04075e-19|cit:102630812|K12604 CCR4-NOT transcription complex subunit 1 | (RefSeq) CCR4-NOT transcription complex subunit 1	ko03018:RNA degradation	[K]	Transcription	--	Sodium/hydrogen exchanger 4 GN=NHX4 OS=Arabidopsis thaliana (Mouse-ear cress) PE=2 SV=2	K	Transcription	unnamed protein product [Coffea canephora]
F01_transcript_51551	[U]	Intracellular trafficking, secretion, and vesicular transport	Biological Process: protein transport (GO:0015031);; Cellular Component: integral component of membrane (GO:0016021);;	K10956|0|vvi:100250458|K10956 protein transport protein SEC61 subunit alpha | (RefSeq) protein transport protein Sec61 subunit alpha	ko03060:Protein export;ko04141:Protein processing in endoplasmic reticulum;ko04145:Phagosome	[UO]	--	SecY translocase;; Plug domain of Sec61p	Protein transport protein Sec61 subunit alpha OS=Pyrenomonas salina PE=2 SV=1	U	Intracellular trafficking, secretion, and vesicular transport	unnamed protein product [Coffea canephora]
F01_transcript_142787	[D]	Cell cycle control, cell division, chromosome partitioning	Molecular Function: ATP binding (GO:0005524);; Cellular Component: cytosol (GO:0005829);; Biological Process: iron-sulfur cluster assembly (GO:0016226);; Molecular Function: protein homodimerization activity (GO:0042803);; Molecular Function: metal ion binding (GO:0046872);; Molecular Function: 4 iron, 4 sulfur cluster binding (GO:0051539);;	--	--	[D]	Cell cycle control, cell division, chromosome partitioning	NUBPL iron-transfer P-loop NTPase;; CobQ/CobB/MinD/ParA nucleotide binding domain;; Anion-transporting ATPase;; AAA domain;; ATPase MipZ	Cytosolic Fe-S cluster assembly factor NBP35 {ECO:0000255|HAMAP-Rule:MF_03038} GN=At5g50960 OS=Arabidopsis thaliana (Mouse-ear cress) PE=1 SV=1	D	Cell cycle control, cell division, chromosome partitioning	PREDICTED: cytosolic Fe-S cluster assembly factor NBP35-like [Sesamum indicum]
F01_transcript_36188	--	--	Biological Process: lipid metabolic process (GO:0006629);; Cellular Component: integral component of membrane (GO:0016021);; Molecular Function: oxidoreductase activity, acting on paired donors, with oxidation of a pair of donors resulting in the reduction of molecular oxygen to two molecules of water (GO:0016717);; Molecular Function: phosphatidylcholine desaturase activity (GO:0050184);; Biolog…	K10256|1.35862e-12|pda:103713931|K10256 omega-6 fatty acid desaturase / acyl-lipid omega-6 desaturase (Delta-12 desaturase) [EC:1.14.19.6 1.14.19.22] | (RefSeq) omega-6 fatty acid desaturase, endoplasmic reticulum isozyme 2-like	ko01040:Biosynthesis of unsaturated fatty acids;ko01212:Fatty acid metabolism	--	--	--	Omega-6 fatty acid desaturase, endoplasmic reticulum isozyme 2 GN=FAD2-2 OS=Glycine max (Soybean) PE=2 SV=1	I	Lipid transport and metabolism	unnamed protein product [Coffea canephora]
F01_transcript_70452	--	--	Cellular Component: integral component of membrane (GO:0016021);;	--	--	--	--	--	--	S	Function unknown	PREDICTED: uncharacterized protein LOC104093548 [Nicotiana tomentosiformis]
F01_transcript_54843	[F]	Nucleotide transport and metabolism	Molecular Function: formate-tetrahydrofolate ligase activity (GO:0004329);; Molecular Function: methenyltetrahydrofolate cyclohydrolase activity (GO:0004477);; Molecular Function: methylenetetrahydrofolate dehydrogenase (NADP+) activity (GO:0004488);; Molecular Function: copper ion binding (GO:0005507);; Molecular Function: ATP binding (GO:0005524);; Cellular Component: cytosol (GO:0005829);; Cel…	K01938|1.09141e-59|pop:POPTR_0001s04800g|K01938 formate--tetrahydrofolate ligase [EC:6.3.4.3] | (RefSeq) POPTRDRAFT_829297; 10-formyltetrahydrofolate synthetase family protein	ko00670:One carbon pool by folate;ko01200:Carbon metabolism	--	--	Formate--tetrahydrofolate ligase;; Importin-beta N-terminal domain	Formate--tetrahydrofolate ligase GN=THFS OS=Arabidopsis thaliana (Mouse-ear cress) PE=1 SV=1	F	Nucleotide transport and metabolism	hypothetical protein POPTR_0001s04800g [Populus trichocarpa]
F01_transcript_43230	[R]	General function prediction only	Biological Process: protein phosphorylation (GO:0006468);; Molecular Function: myosin heavy chain kinase activity (GO:0016905);;	K14753|4.07828e-66|gmx:547868|K14753 guanine nucleotide-binding protein subunit beta-2-like 1 protein | (RefSeq) G beta-like protein	--	[T]	Signal transduction mechanisms	WD domain, G-beta repeat;; WD domain, G-beta repeat	Guanine nucleotide-binding protein subunit beta-like protein OS=Glycine max (Soybean) PE=1 SV=1	S	Function unknown	guanine nucleotide-binding protein subunit beta-like protein [Glycine max]
F01_transcript_25632	--	--	--	--	--	[R]	General function prediction only	F-box-like;; F-box domain	--	S	Function unknown	F-box/WD repeat-containing protein [Medicago truncatula]
F01_transcript_3105	[E]	Amino acid transport and metabolism	Molecular Function: glutamate 5-kinase activity (GO:0004349);; Molecular Function: glutamate-5-semialdehyde dehydrogenase activity (GO:0004350);; Molecular Function: ATP binding (GO:0005524);; Cellular Component: cytoplasm (GO:0005737);; Biological Process: phosphorylation (GO:0016310);; Biological Process: oxidation-reduction process (GO:0055114);; Biological Process: L-proline biosynthetic proc…	K12657|0|tcc:TCM_042687|K12657 delta-1-pyrroline-5-carboxylate synthetase [EC:2.7.2.11 1.2.1.41] | (RefSeq) Pyrroline-5-carboxylate synthetase isoform 1	ko00330:Arginine and proline metabolism;ko01230:Biosynthesis of amino acids	[E]	Amino acid transport and metabolism	Aldehyde dehydrogenase family;; Amino acid kinase family	Gamma-glutamyl phosphate reductase OS=Actinidia deliciosa (Kiwi) PE=2 SV=1	E	Amino acid transport and metabolism	PREDICTED: delta-1-pyrroline-5-carboxylate synthase [Sesamum indicum]
F01_transcript_88370	--	--	Biological Process: cytoplasmic translation (GO:0002181);; Molecular Function: structural constituent of ribosome (GO:0003735);; Cellular Component: cytosolic large ribosomal subunit (GO:0022625);;	K02910|2.69274e-32|obr:102722685|K02910 large subunit ribosomal protein L31e | (RefSeq) 60S ribosomal protein L31-like	ko03010:Ribosome	[J]	Translation, ribosomal structure and biogenesis	Ribosomal protein L31e	60S ribosomal protein L31 GN=RPL31 OS=Perilla frutescens (Beefsteak mint) PE=2 SV=1	J	Translation, ribosomal structure and biogenesis	ribosomal protein L31 [Panax ginseng]
F01_transcript_78943	--	--	Molecular Function: ATP binding (GO:0005524);;	K08900|2.20907e-30|tcc:TCM_027791|K08900 mitochondrial chaperone BCS1 | (RefSeq) Cytochrome BC1 synthesis, putative	--	[O]	Posttranslational modification, protein turnover, chaperones	--	--	O	Posttranslational modification, protein turnover, chaperones	Cytochrome BC1 synthesis, putative [Theobroma cacao]
F01_transcript_16197	--	--	Molecular Function: phosphoprotein phosphatase activity (GO:0004721);; Biological Process: dephosphorylation (GO:0016311);;	K17616|0|vvi:100258847|K17616 CTD small phosphatase-like protein 2 [EC:3.1.3.-] | (RefSeq) uncharacterized LOC100258847	--	[K]	Transcription	NLI interacting factor-like phosphatase	Mitochondrial import inner membrane translocase subunit TIM50 (Precursor) GN=F14J16.15 OS=Arabidopsis thaliana (Mouse-ear cress) PE=1 SV=1	K	Transcription	PREDICTED: uncharacterized protein LOC100258847 isoform X1 [Vitis vinifera]
F01_transcript_116120	--	--	Molecular Function: transporter activity (GO:0005215);; Biological Process: transport (GO:0006810);; Biological Process: plant-type hypersensitive response (GO:0009626);; Cellular Component: integral component of membrane (GO:0016021);;	--	--	[T]	Signal transduction mechanisms	Organic solute transporter Ostalpha	--	S	Function unknown	conserved hypothetical protein [Ricinus communis]
F01_transcript_119381	--	--	Molecular Function: DNA binding (GO:0003677);; Cellular Component: nucleus (GO:0005634);; Biological Process: regulation of transcription, DNA-templated (GO:0006355);; Biological Process: auxin-activated signaling pathway (GO:0009734);;	--	--	--	--	B3 DNA binding domain;; Auxin response factor;; AUX/IAA family	Auxin response factor 19 GN=T29M8.9 OS=Arabidopsis thaliana (Mouse-ear cress) PE=1 SV=2	K	Transcription	unnamed protein product [Vitis vinifera]
F01_transcript_53671	--	--	Molecular Function: nucleic acid binding (GO:0003676);;	--	--	[L]	Replication, recombination and repair	hAT family C-terminal dimerisation region	Zinc finger BED domain-containing protein RICESLEEPER 3 GN=OSJNBb0035N21.10 OS=Oryza sativa subsp. japonica (Rice) PE=2 SV=1	S	Function unknown	PREDICTED: zinc finger BED domain-containing protein DAYSLEEPER-like [Brassica rapa]
F01_transcript_63086	--	--	--	--	--	[T]	Signal transduction mechanisms	--	Probable ADP-ribosylation factor GTPase-activating protein AGD14 GN=At1g08680/At1g08690 OS=Arabidopsis thaliana (Mouse-ear cress) PE=1 SV=2	U	Intracellular trafficking, secretion, and vesicular transport	PREDICTED: probable ADP-ribosylation factor GTPase-activating protein AGD14 [Malus domestica]
F01_transcript_90654	[R]	General function prediction only	Molecular Function: peroxidase activity (GO:0004601);; Cellular Component: integral component of membrane (GO:0016021);; Biological Process: cellular oxidant detoxification (GO:0098869);;	K09775|1.53679e-38|pxb:103941666|K09775 uncharacterized protein | (RefSeq) uncharacterized membrane protein YuiD-like	--	--	--	Divergent PAP2 family	--	S	Function unknown	PREDICTED: uncharacterized protein LOC103951400 [Pyrus x bretschneideri]
F01_transcript_145632	--	--	--	K04523|2.41363e-23|pmum:103334766|K04523 ubiquilin | (RefSeq) ubiquitin domain-containing protein DSK2a-like	ko04141:Protein processing in endoplasmic reticulum	[OR]	--	--	Ubiquitin domain-containing protein DSK2b GN=DSK2B OS=Arabidopsis thaliana (Mouse-ear cress) PE=1 SV=1	O	Posttranslational modification, protein turnover, chaperones	hypothetical protein L484_006581 [Morus notabilis]
F01_transcript_107449	--	--	--	--	--	--	--	--	--	S	Function unknown	PREDICTED: uncharacterized protein LOC104104785 [Nicotiana tomentosiformis]
F01_transcript_130770	--	--	--	K09338|2.68802e-55|brp:103835624|K09338 homeobox-leucine zipper protein | (RefSeq) homeobox-leucine zipper protein ATHB-23-like	--	[K]	Transcription	Homeobox domain;; Homeobox associated leucine zipper	Homeobox-leucine zipper protein ATHB-13 GN=ATHB-13 OS=Arabidopsis thaliana (Mouse-ear cress) PE=2 SV=2	K	Transcription	unnamed protein product [Vitis vinifera]
F01_transcript_109538	--	--	--	--	--	[KTDL]	--	Regulator of Ty1 transposition protein 107 BRCT domain;; BRCA1 C Terminus (BRCT) domain	--	S	Function unknown	hypothetical protein EUGRSUZ_L016021, partial [Eucalyptus grandis]
F01_transcript_50063	--	--	Molecular Function: zinc ion binding (GO:0008270);;	--	--	[R]	General function prediction only	PPR repeat family;; PPR repeat;; PPR repeat;; Pentatricopeptide repeat domain;; Pentacotripeptide-repeat region of PRORP;; PPR repeat family;; PPR repeat;; PPR repeat;; Pentatricopeptide repeat domain;; DYW family of nucleic acid deaminases;; PPR repeat;; PPR repeat family;; PPR repeat	Pentatricopeptide repeat-containing protein At2g22070 GN=PCMP-H41 OS=Arabidopsis thaliana (Mouse-ear cress) PE=3 SV=1	S	Function unknown	PREDICTED: pentatricopeptide repeat-containing protein At1g25360 [Vitis vinifera]
F01_transcript_12097	[T]	Signal transduction mechanisms	Biological Process: developmental process involved in reproduction (GO:0003006);; Molecular Function: protein serine/threonine kinase activity (GO:0004674);; Molecular Function: ATP binding (GO:0005524);; Cellular Component: nucleus (GO:0005634);; Cellular Component: cytoplasm (GO:0005737);; Biological Process: protein phosphorylation (GO:0006468);; Biological Process: detection of nutrient (GO:0…	K07198|0|pper:PRUPE_ppa004347mg|K07198 5'-AMP-activated protein kinase, catalytic alpha subunit [EC:2.7.11.11] | (RefSeq) hypothetical protein	ko04140:Regulation of autophagy	[T]	Signal transduction mechanisms	Protein kinase domain;; Protein tyrosine kinase;; Kinase associated domain 1;; Kinase-like;; Adenylate sensor of SNF1-like protein kinase;; UBA/TS-N domain;; RIO1 family	SNF1-related protein kinase catalytic subunit alpha KIN10 GN=At3g01090 OS=Arabidopsis thaliana (Mouse-ear cress) PE=1 SV=2	T	Signal transduction mechanisms	sucrose non-fermenting 1 [Camellia sinensis]
F01_transcript_9690	[M]	Cell wall/membrane/envelope biogenesis	Molecular Function: 3-beta-hydroxy-delta5-steroid dehydrogenase activity (GO:0003854);; Cellular Component: endoplasmic reticulum membrane (GO:0005789);; Biological Process: steroid biosynthetic process (GO:0006694);; Cellular Component: integral component of membrane (GO:0016021);; Biological Process: oxidation-reduction process (GO:0055114);;	K07748|0|vvi:100257631|K07748 sterol-4alpha-carboxylate 3-dehydrogenase (decarboxylating) [EC:1.1.1.170] | (RefSeq) 3beta-hydroxysteroid-dehydrogenase/decarboxylase	ko00100:Steroid biosynthesis	[IE]	--	3-beta hydroxysteroid dehydrogenase/isomerase family;; Reticulon;; NAD dependent epimerase/dehydratase family;; GDP-mannose 4,6 dehydratase;; Male sterility protein;; RmlD substrate binding domain;; NAD(P)H-binding;; Polysaccharide biosynthesis protein;; NmrA-like family	3beta-hydroxysteroid-dehydrogenase/decarboxylase isoform 2 GN=T1D16.10 OS=Arabidopsis thaliana (Mouse-ear cress) PE=2 SV=2	M	Cell wall/membrane/envelope biogenesis	PREDICTED: 3beta-hydroxysteroid-dehydrogenase/decarboxylase isoform 2 [Vitis vinifera]
F01_transcript_45208	[J]	Translation, ribosomal structure and biogenesis	Molecular Function: nucleotide binding (GO:0000166);; Molecular Function: nucleic acid binding (GO:0003676);;	--	--	[R]	General function prediction only	RNA recognition motif. (a.k.a. RRM, RBD, or RNP domain)	UBP1-associated proteins 1A GN=UBA1A OS=Arabidopsis thaliana (Mouse-ear cress) PE=1 SV=2	S	Function unknown	PREDICTED: RNA-binding protein 24 isoform X2 [Vitis vinifera]
F01_transcript_21617	--	--	Molecular Function: thiol-dependent ubiquitin-specific protease activity (GO:0004843);; Cellular Component: cytoplasm (GO:0005737);; Biological Process: ubiquitin-dependent protein catabolic process (GO:0006511);; Biological Process: protein deubiquitination (GO:0016579);;	--	--	[O]	Posttranslational modification, protein turnover, chaperones	Ubiquitin carboxyl-terminal hydrolase, family 1	--	O	Posttranslational modification, protein turnover, chaperones	PREDICTED: ubiquitin carboxyl-terminal hydrolase isozyme L3-like isoform X2 [Nicotiana tomentosiformis]
F01_transcript_39408	--	--	Cellular Component: endoplasmic reticulum (GO:0005783);; Cellular Component: plasmodesma (GO:0009506);; Cellular Component: integral component of membrane (GO:0016021);;	K20724|4.29864e-128|cit:102627174|K20724 transmembrane protein 33 | (RefSeq) hypothetical protein	--	--	--	Uncharacterised protein family (UPF0121)	--	S	Function unknown	PREDICTED: uncharacterized protein LOC102627174 [Citrus sinensis]
F01_transcript_76159	--	--	Cellular Component: nucleolus (GO:0005730);; Cellular Component: cytosol (GO:0005829);; Biological Process: cellular ion homeostasis (GO:0006873);; Biological Process: response to osmotic stress (GO:0006970);; Biological Process: response to water deprivation (GO:0009414);; Biological Process: response to abscisic acid (GO:0009737);; Biological Process: embryo development ending in seed dormancy …	--	--	--	--	--	Late embryogenesis abundant protein D-34 OS=Gossypium hirsutum (Upland cotton) PE=4 SV=1	S	Function unknown	late embryogenesis abundant protein 3 [Jatropha curcas]
F01_transcript_135366	[J]	Translation, ribosomal structure and biogenesis	Molecular Function: structural constituent of ribosome (GO:0003735);; Cellular Component: cell wall (GO:0005618);; Cellular Component: mitochondrion (GO:0005739);; Cellular Component: vacuolar membrane (GO:0005774);; Biological Process: translation (GO:0006412);; Biological Process: transport (GO:0006810);; Cellular Component: chloroplast (GO:0009507);; Biological Process: response to salt stress…	K15102|1.57641e-48|cic:CICLE_v10015678mg|K15102 solute carrier family 25 (mitochondrial phosphate transporter), member 3 | (RefSeq) hypothetical protein	--	[C]	Energy production and conversion	Ribosomal RNA adenine dimethylase;; Ribosomal RNA adenine dimethylase;; Phosphopantothenate/pantothenate synthetase	Mitochondrial phosphate carrier protein 3, mitochondrial (Precursor) GN=MUA22_4 OS=Arabidopsis thaliana (Mouse-ear cress) PE=1 SV=1	S	Function unknown	unnamed protein product [Vitis vinifera]
F01_transcript_63981	[G]	Carbohydrate transport and metabolism	Molecular Function: cellulase activity (GO:0008810);; Biological Process: cell wall modification involved in fruit ripening (GO:0009829);; Biological Process: cellulose catabolic process (GO:0030245);;	--	--	--	--	Glycosyl hydrolase family 9;; Glycosyl hydrolase family 9	Endoglucanase (Precursor) OS=Phaseolus vulgaris (Kidney bean) PE=2 SV=2	G	Carbohydrate transport and metabolism	cellulase [Sambucus nigra]
F01_transcript_56332	[G]	Carbohydrate transport and metabolism	Biological Process: glucose metabolic process (GO:0006006);; Molecular Function: oxidoreductase activity, acting on the aldehyde or oxo group of donors, NAD or NADP as acceptor (GO:0016620);; Molecular Function: NADP binding (GO:0050661);; Molecular Function: NAD binding (GO:0051287);; Biological Process: oxidation-reduction process (GO:0055114);;	K00134|1.52817e-33|pper:PRUPE_ppa008227mg|K00134 glyceraldehyde 3-phosphate dehydrogenase [EC:1.2.1.12] | (RefSeq) hypothetical protein	ko00010:Glycolysis / Gluconeogenesis;ko00710:Carbon fixation in photosynthetic organisms;ko01200:Carbon metabolism;ko01230:Biosynthesis of amino acids	[G]	Carbohydrate transport and metabolism	--	Glyceraldehyde-3-phosphate dehydrogenase, cytosolic GN=GAPC OS=Antirrhinum majus (Garden snapdragon) PE=2 SV=1	G	Carbohydrate transport and metabolism	glyceraldehyde-3-phosphate dehydrogenase, partial [Panax ginseng]
F01_transcript_20013	[R]	General function prediction only	Biological Process: ethanol oxidation (GO:0006069);; Molecular Function: zinc ion binding (GO:0008270);; Molecular Function: S-(hydroxymethyl)glutathione dehydrogenase activity (GO:0051903);;	--	--	[Q]	Secondary metabolites biosynthesis, transport and catabolism	Alcohol dehydrogenase GroES-like domain;; Zinc-binding dehydrogenase	Alcohol dehydrogenase class-3 GN=MRH10.4 OS=Arabidopsis thaliana (Mouse-ear cress) PE=1 SV=2	C	Energy production and conversion	alcohol dehydrogenase, putative [Ricinus communis]
F01_transcript_86946	--	--	Cellular Component: chloroplast envelope (GO:0009941);; Molecular Function: magnesium ion transmembrane transporter activity (GO:0015095);; Biological Process: magnesium ion transport (GO:0015693);; Cellular Component: integral component of membrane (GO:0016021);; Biological Process: magnesium ion transmembrane transport (GO:1903830);;	K16075|0|vvi:100246455|K16075 magnesium transporter | (RefSeq) magnesium transporter MRS2-11, chloroplastic	--	[P]	Inorganic ion transport and metabolism	CorA-like Mg2+ transporter protein	Magnesium transporter MRS2-11, chloroplastic (Precursor) GN=MRN17.6 OS=Arabidopsis thaliana (Mouse-ear cress) PE=2 SV=1	U	Intracellular trafficking, secretion, and vesicular transport	unnamed protein product [Vitis vinifera]
F01_transcript_51825	[CR]	--	Molecular Function: NADPH:quinone reductase activity (GO:0003960);; Cellular Component: cytosol (GO:0005829);; Molecular Function: zinc ion binding (GO:0008270);; Biological Process: oxidation-reduction process (GO:0055114);;	--	--	[CR]	--	Zinc-binding dehydrogenase	--	C	Energy production and conversion	PREDICTED: probable quinone oxidoreductase isoform X2 [Populus euphratica]
F01_transcript_102723	--	--	Cellular Component: integral component of membrane (GO:0016021);;	--	--	[U]	Intracellular trafficking, secretion, and vesicular transport	Endoplasmic reticulum vesicle transporter;; Endoplasmic Reticulum-Golgi Intermediate Compartment (ERGIC)	Protein disulfide-isomerase 5-4 (Precursor) GN=T24A18.30 OS=Arabidopsis thaliana (Mouse-ear cress) PE=2 SV=1	U	Intracellular trafficking, secretion, and vesicular transport	Endoplasmic reticulum-Golgi intermediate compartment protein, putative [Ricinus communis]
F01_transcript_65900	--	--	Molecular Function: metal ion binding (GO:0046872);;	--	--	[O]	Posttranslational modification, protein turnover, chaperones	Zinc finger, C3HC4 type (RING finger)	--	O	Posttranslational modification, protein turnover, chaperones	PREDICTED: RING finger protein 10 isoform X1 [Vitis vinifera]
F01_transcript_6496	[T]	Signal transduction mechanisms	Molecular Function: protein serine/threonine kinase activity (GO:0004674);; Molecular Function: ATP binding (GO:0005524);; Cellular Component: nucleus (GO:0005634);; Cellular Component: cytosol (GO:0005829);; Cellular Component: plasma membrane (GO:0005886);; Biological Process: protein phosphorylation (GO:0006468);; Biological Process: response to nutrient (GO:0007584);; Biological Process: resp…	--	--	[T]	Signal transduction mechanisms	Protein kinase domain;; Protein tyrosine kinase;; NAF domain;; Kinase-like	CBL-interacting serine/threonine-protein kinase 23 GN=At1g30270 OS=Arabidopsis thaliana (Mouse-ear cress) PE=1 SV=1	T	Signal transduction mechanisms	PREDICTED: CBL-interacting protein kinase 04 isoform X1 [Vitis vinifera]
F01_transcript_55286	--	--	Cellular Component: plasma membrane (GO:0005886);; Cellular Component: integral component of membrane (GO:0016021);;	--	--	--	--	Protein of unknown function (DUF1218)	--	S	Function unknown	unnamed protein product [Coffea canephora]
F01_transcript_99052	[J]	Translation, ribosomal structure and biogenesis	Molecular Function: structural constituent of ribosome (GO:0003735);; Biological Process: translation (GO:0006412);; Molecular Function: NADH dehydrogenase (ubiquinone) activity (GO:0008137);; Cellular Component: chloroplast (GO:0009507);; Cellular Component: small ribosomal subunit (GO:0015935);; Cellular Component: integral component of membrane (GO:0016021);; Molecular Function: rRNA binding (…	--	--	[J]	Translation, ribosomal structure and biogenesis	Ribosomal protein S12/S23;; NADH-ubiquinone/plastoquinone oxidoreductase, chain 3	Ribosomal protein S12, mitochondrial GN=RPS12 OS=Helianthus annuus (Common sunflower) PE=2 SV=1	J	Translation, ribosomal structure and biogenesis	NADH-ubiquinone oxidoreductase chain [Medicago truncatula]
F01_transcript_108894	--	--	--	--	--	--	--	--	--	--	--	PREDICTED: transcription factor bHLH155-like isoform X3 [Solanum tuberosum]
F01_transcript_95840	--	--	Cellular Component: endosome (GO:0005768);; Cellular Component: vacuolar membrane (GO:0005774);; Cellular Component: trans-Golgi network (GO:0005802);; Molecular Function: S-adenosylmethionine-dependent methyltransferase activity (GO:0008757);; Cellular Component: integral component of membrane (GO:0016021);; Biological Process: methylation (GO:0032259);;	--	--	--	--	--	--	S	Function unknown	unnamed protein product [Coffea canephora]
F01_transcript_81169	--	--	Cellular Component: proteasome complex (GO:0000502);;	K03036|8.80143e-113|pop:POPTR_0013s02100g|K03036 26S proteasome regulatory subunit N6 | (RefSeq) POPTRDRAFT_729575; 19S proteosome subunit 9 family protein	ko03050:Proteasome	[O]	Posttranslational modification, protein turnover, chaperones	--	26S proteasome non-ATPase regulatory subunit 11 homolog GN=F28N24.15 OS=Arabidopsis thaliana (Mouse-ear cress) PE=1 SV=1	O	Posttranslational modification, protein turnover, chaperones	unnamed protein product [Coffea canephora]
F01_transcript_219	--	--	Molecular Function: DNA binding (GO:0003677);; Cellular Component: nucleus (GO:0005634);; Biological Process: regulation of transcription, DNA-templated (GO:0006355);; Biological Process: auxin-activated signaling pathway (GO:0009734);;	--	--	--	--	Auxin response factor;; B3 DNA binding domain;; AUX/IAA family	Auxin response factor 5 OS=Oryza sativa subsp. japonica (Rice) PE=2 SV=2	K	Transcription	PREDICTED: auxin response factor 19-like [Vitis vinifera]
F01_transcript_24424	--	--	Molecular Function: RNA polymerase II transcription coactivator activity involved in preinitiation complex assembly (GO:0001128);; Biological Process: regulation of transcription from RNA polymerase II promoter (GO:0006357);; Cellular Component: mediator complex (GO:0016592);; Biological Process: RNA polymerase II transcriptional preinitiation complex assembly (GO:0051123);; Cellular Component: c…	K15128|5.39854e-140|vvi:100253150|K15128 mediator of RNA polymerase II transcription subunit 6 | (RefSeq) mediator of RNA polymerase II transcription subunit 6	--	[K]	Transcription	MED6 mediator sub complex component	Mediator of RNA polymerase II transcription subunit 6 GN=MHC9 OS=Arabidopsis thaliana (Mouse-ear cress) PE=1 SV=1	K	Transcription	PREDICTED: mediator of RNA polymerase II transcription subunit 6 [Vitis vinifera]
F01_transcript_24962	--	--	Biological Process: protein transport (GO:0015031);;	K20472|1.01742e-104|vvi:100260697|K20472 coatomer subunit zeta | (RefSeq) coatomer subunit zeta-1	--	[U]	Intracellular trafficking, secretion, and vesicular transport	Clathrin adaptor complex small chain	Coatomer subunit zeta-1 GN=At1g60970 OS=Arabidopsis thaliana (Mouse-ear cress) PE=2 SV=1	U	Intracellular trafficking, secretion, and vesicular transport	PREDICTED: coatomer subunit zeta-1-like [Vitis vinifera]
F01_transcript_102678	[J]	Translation, ribosomal structure and biogenesis	Molecular Function: ubiquitin-protein transferase activity (GO:0004842);; Biological Process: protein ubiquitination (GO:0016567);;	K10599|2.30836e-31|vvi:100249408|K10599 pre-mRNA-processing factor 19 [EC:2.3.2.27] | (RefSeq) pre-mRNA-processing factor 19	ko03040:Spliceosome;ko04120:Ubiquitin mediated proteolysis	[R]	General function prediction only	IPP transferase	Pre-mRNA-processing factor 19 {ECO:0000305} OS=Oryza sativa subsp. japonica (Rice) PE=2 SV=1	A	RNA processing and modification	PREDICTED: pre-mRNA-processing factor 19-like [Sesamum indicum]
F01_transcript_107751	--	--	Cellular Component: mitochondrion (GO:0005739);;	--	--	[S]	Function unknown	--	--	S	Function unknown	hypothetical protein AALP_AA1G054000 [Arabis alpina]
F01_transcript_45722	[R]	General function prediction only	Cellular Component: nucleus (GO:0005634);; Biological Process: 7-methylguanosine metabolic process (GO:0008618);; Biological Process: tRNA methylation (GO:0030488);; Biological Process: RNA (guanine-N7)-methylation (GO:0036265);;	K15443|1.93547e-137|vvi:100855304|K15443 tRNA (guanine-N(7)-)-methyltransferase subunit TRM82 | (RefSeq) COMPASS-like H3K4 histone methylase component WDR5A	--	[S]	Function unknown	WD domain, G-beta repeat;; Anaphase-promoting complex subunit 4 WD40 domain	Coatomer subunit alpha-2 GN=At2g21390 OS=Arabidopsis thaliana (Mouse-ear cress) PE=2 SV=1	S	Function unknown	PREDICTED: tRNA (guanine-N(7)-)-methyltransferase non-catalytic subunit wdr4 [Vitis vinifera]
F01_transcript_23844	--	--	Molecular Function: structural constituent of ribosome (GO:0003735);; Cellular Component: ribosome (GO:0005840);; Biological Process: translation (GO:0006412);;	K02934|2.03474e-117|pmum:103327250|K02934 large subunit ribosomal protein L6e | (RefSeq) 60S ribosomal protein L6-like	ko03010:Ribosome	[J]	Translation, ribosomal structure and biogenesis	Ribosomal protein L6e;; Ribosomal protein L6, N-terminal domain	60S ribosomal protein L6 GN=RPL6 OS=Mesembryanthemum crystallinum (Common ice plant) PE=2 SV=1	J	Translation, ribosomal structure and biogenesis	60S ribosomal protein L6-like protein [Panax quinquefolius]
F01_transcript_111681	--	--	--	--	--	--	--	--	--	S	Function unknown	unnamed protein product [Coffea canephora]
F01_transcript_123491	--	--	--	--	--	--	--	--	Putative EG45-like domain containing protein 1 (Precursor) GN=F17I23_280 OS=Arabidopsis thaliana (Mouse-ear cress) PE=3 SV=1	S	Function unknown	hypothetical protein CISIN_1g032308mg [Citrus sinensis]
F01_transcript_101680	[R]	General function prediction only	--	--	--	--	--	--	--	S	Function unknown	PREDICTED: uncharacterized protein LOC100783799 [Glycine max]
F01_transcript_87704	--	--	Biological Process: cytokinesis by cell plate formation (GO:0000911);; Molecular Function: GTPase activity (GO:0003924);; Molecular Function: GTP binding (GO:0005525);; Cellular Component: cell plate (GO:0009504);;	--	--	[UR]	--	--	Dynamin-related protein 5A GN=DRP5A OS=Arabidopsis thaliana (Mouse-ear cress) PE=2 SV=1	S	Function unknown	PREDICTED: dynamin-related protein 5A [Vitis vinifera]
F01_transcript_140565	[K]	Transcription	Molecular Function: protein kinase activity (GO:0004672);; Molecular Function: ATP binding (GO:0005524);; Biological Process: protein phosphorylation (GO:0006468);; Molecular Function: hydrolase activity (GO:0016787);;	--	--	[T]	Signal transduction mechanisms	Protein tyrosine kinase;; Protein kinase domain	Inactive protein kinase SELMODRAFT_444075 GN=SELMODRAFT_444075 OS=Selaginella moellendorffii (Spikemoss) PE=2 SV=1	T	Signal transduction mechanisms	hypothetical protein PRUPE_ppa001766mg [Prunus persica]
F01_transcript_36799	--	--	Biological Process: amino acid transmembrane transport (GO:0003333);; Molecular Function: amine transmembrane transporter activity (GO:0005275);; Cellular Component: plasma membrane (GO:0005886);; Molecular Function: gamma-aminobutyric acid transmembrane transporter activity (GO:0015185);; Biological Process: gamma-aminobutyric acid transport (GO:0015812);; Cellular Component: integral component …	--	--	[E]	Amino acid transport and metabolism	Transmembrane amino acid transporter protein	GABA transporter 1 GN=T23G18.9 OS=Arabidopsis thaliana (Mouse-ear cress) PE=1 SV=1	E	Amino acid transport and metabolism	Transmembrane amino acid transporter family protein isoform 1 [Theobroma cacao]
F01_transcript_92383	[QV]	--	Molecular Function: monooxygenase activity (GO:0004497);; Molecular Function: iron ion binding (GO:0005506);; Cellular Component: integral component of membrane (GO:0016021);; Molecular Function: oxidoreductase activity, acting on paired donors, with incorporation or reduction of molecular oxygen (GO:0016705);; Molecular Function: heme binding (GO:0020037);; Biological Process: oxidation-reductio…	--	--	[Q]	Secondary metabolites biosynthesis, transport and catabolism	Cytochrome P450;; Cytochrome P450;; Cytochrome P450	Cytochrome P450 CYP71D312 OS=Panax ginseng (Korean ginseng) PE=2 SV=1	Q	Secondary metabolites biosynthesis, transport and catabolism	RecName: Full=Cytochrome P450 CYP71D312 [Panax ginseng]
F01_transcript_116264	[G]	Carbohydrate transport and metabolism	Molecular Function: UTP:glucose-1-phosphate uridylyltransferase activity (GO:0003983);; Cellular Component: cytosol (GO:0005829);; Biological Process: UDP-glucose metabolic process (GO:0006011);; Biological Process: nucleotide-sugar biosynthetic process (GO:0009226);; Biological Process: pollen development (GO:0009555);; Molecular Function: UTP:arabinose-1-phosphate uridylyltransferase activity (…	K12447|0|cic:CICLE_v10000592mg|K12447 UDP-sugar pyrophosphorylase [EC:2.7.7.64] | (RefSeq) hypothetical protein	ko00040:Pentose and glucuronate interconversions;ko00052:Galactose metabolism;ko00053:Ascorbate and aldarate metabolism;ko00520:Amino sugar and nucleotide sugar metabolism	[M]	Cell wall/membrane/envelope biogenesis	--	UDP-sugar pyrophosphorylase GN=USP OS=Cucumis melo (Muskmelon) PE=1 SV=1	G	Carbohydrate transport and metabolism	PREDICTED: UDP-sugar pyrophosphorylase [Nicotiana sylvestris]
F01_transcript_125501	[R]	General function prediction only	Molecular Function: Hsp90 protein binding (GO:0051879);;	--	--	[R]	General function prediction only	Tetratricopeptide repeat;; Tetratricopeptide repeat;; Tetratricopeptide repeat;; Tetratricopeptide repeat;; TPR repeat;; Fis1 C-terminal tetratricopeptide repeat;; Tetratricopeptide repeat;; Tetratricopeptide repeat	TPR repeat-containing thioredoxin TTL4 GN=TTL4 OS=Arabidopsis thaliana (Mouse-ear cress) PE=2 SV=1	S	Function unknown	Tetratricopeptide repeat (TPR)-like superfamily protein [Theobroma cacao]
F01_transcript_4760	[P]	Inorganic ion transport and metabolism	Cellular Component: integral component of plasma membrane (GO:0005887);; Cellular Component: plasmodesma (GO:0009506);; Molecular Function: high-affinity secondary active ammonium transmembrane transporter activity (GO:0015398);; Biological Process: organic cation transport (GO:0015695);; Biological Process: nitrogen utilization (GO:0019740);; Biological Process: ammonium transmembrane transport …	K03320|0|vvi:100248822|K03320 ammonium transporter, Amt family | (RefSeq) ammonium transporter 3 member 3	--	[P]	Inorganic ion transport and metabolism	BAG domain;; Ubiquitin family	Ammonium transporter 3 member 3 OS=Oryza sativa subsp. japonica (Rice) PE=2 SV=1	P	Inorganic ion transport and metabolism	PREDICTED: ammonium transporter 3 member 3 [Vitis vinifera]
F01_transcript_77819	--	--	Molecular Function: DNA binding (GO:0003677);; Molecular Function: transcription factor activity, sequence-specific DNA binding (GO:0003700);; Cellular Component: nucleus (GO:0005634);; Biological Process: regulation of transcription, DNA-templated (GO:0006355);; Biological Process: multicellular organism development (GO:0007275);;	K09285|3.53275e-160|vvi:100252316|K09285 AP2-like factor, ANT lineage | (RefSeq) AP2-like ethylene-responsive transcription factor ANT	--	--	--	AP2 domain	AP2-like ethylene-responsive transcription factor ANT GN=T28I19.30 OS=Arabidopsis thaliana (Mouse-ear cress) PE=1 SV=2	K	Transcription	PREDICTED: AP2-like ethylene-responsive transcription factor ANT [Vitis vinifera]
F01_transcript_36821	[T]	Signal transduction mechanisms	Biological Process: transcription, DNA-templated (GO:0006351);; Biological Process: signal transduction (GO:0007165);;	K14491|0|vvi:100246057|K14491 two-component response regulator ARR-B family | (RefSeq) RRB5; two-component response regulator ORR26	ko04075:Plant hormone signal transduction	[K]	Transcription	Response regulator receiver domain;; Myb-like DNA-binding domain	Two-component response regulator ARR11 GN=F12A21.15 OS=Arabidopsis thaliana (Mouse-ear cress) PE=1 SV=1	T	Signal transduction mechanisms	PREDICTED: two-component response regulator ARR11 [Vitis vinifera]
F01_transcript_145122	--	--	Cellular Component: integral component of membrane (GO:0016021);; Molecular Function: oxidoreductase activity (GO:0016491);; Biological Process: oxidation-reduction process (GO:0055114);;	--	--	[PQ]	--	--	Ferric reduction oxidase 6 GN=FRO6 OS=Arabidopsis thaliana (Mouse-ear cress) PE=2 SV=1	U	Intracellular trafficking, secretion, and vesicular transport	PREDICTED: ferric reduction oxidase 7, chloroplastic [Sesamum indicum]
F01_transcript_82879	[G]	Carbohydrate transport and metabolism	Molecular Function: beta-glucosidase activity (GO:0008422);; Biological Process: glucan catabolic process (GO:0009251);; Molecular Function: scopolin beta-glucosidase activity (GO:0102483);;	K05349|0|tcc:TCM_041670|K05349 beta-glucosidase [EC:3.2.1.21] | (RefSeq) Glycosyl hydrolase family protein isoform 1	ko00460:Cyanoamino acid metabolism;ko00500:Starch and sucrose metabolism;ko00940:Phenylpropanoid biosynthesis	--	--	Glycosyl hydrolase family 3 N terminal domain;; Glycosyl hydrolase family 3 C-terminal domain	Alpha-L-arabinofuranosidase (Precursor; Fragment) OS=Medicago sativa subsp. varia (Alfalfa) PE=1 SV=1	G	Carbohydrate transport and metabolism	glycoside hydrolase family 3 protein [Medicago truncatula]
F01_transcript_11917	[I]	Lipid transport and metabolism	Molecular Function: phosphoethanolamine N-methyltransferase activity (GO:0000234);; Cellular Component: cytosol (GO:0005829);; Biological Process: phosphatidylcholine biosynthetic process (GO:0006656);; Biological Process: pollen development (GO:0009555);; Biological Process: pollen tube growth (GO:0009860);; Biological Process: pollen tube guidance (GO:0010183);; Biological Process: methylation …	--	--	[IR]	--	Methyltransferase domain;; Methyltransferase domain;; Methyltransferase domain;; Methyltransferase domain;; Methyltransferase domain;; Mycolic acid cyclopropane synthetase;; AdoMet dependent proline di-methyltransferase;; Tellurite resistance protein TehB;; ubiE/COQ5 methyltransferase family;; Methyltransferase small domain;; Nodulation protein S (NodS);; CheR methyltransferase, SAM binding domai…	Phosphoethanolamine N-methyltransferase 1 GN=MEB5.22 OS=Arabidopsis thaliana (Mouse-ear cress) PE=1 SV=1	S	Function unknown	phosphoethanolamine n-methyltransferase, putative [Ricinus communis]
F01_transcript_129672	--	--	Cellular Component: endoplasmic reticulum (GO:0005783);; Biological Process: ER to Golgi vesicle-mediated transport (GO:0006888);; Biological Process: retrograde vesicle-mediated transport, Golgi to ER (GO:0006890);; Cellular Component: integral component of membrane (GO:0016021);; Cellular Component: SNARE complex (GO:0031201);;	K08492|3.98544e-72|sot:102584484|K08492 syntaxin 18 | (RefSeq) syntaxin-81-like	ko04130:SNARE interactions in vesicular transport;ko04145:Phagosome	[U]	Intracellular trafficking, secretion, and vesicular transport	SNARE-complex protein Syntaxin-18 N-terminus	Syntaxin-81 GN=SYP81 OS=Arabidopsis thaliana (Mouse-ear cress) PE=1 SV=2	U	Intracellular trafficking, secretion, and vesicular transport	PREDICTED: syntaxin-81-like [Solanum tuberosum]
F01_transcript_31492	--	--	Molecular Function: translation initiation factor activity (GO:0003743);; Biological Process: translational initiation (GO:0006413);;	K03113|4.39432e-11|pvu:PHAVU_011G139000g|K03113 translation initiation factor 1 | (RefSeq) hypothetical protein	ko03013:RNA transport	[J]	Translation, ribosomal structure and biogenesis	--	Protein translation factor SUI1 homolog GN=TIF OS=Zea mays (Maize) PE=3 SV=1	J	Translation, ribosomal structure and biogenesis	PREDICTED: protein translation factor SUI1 homolog [Nelumbo nucifera]
F01_transcript_93005	[G]	Carbohydrate transport and metabolism	Cellular Component: nucleus (GO:0005634);; Cellular Component: integral component of membrane (GO:0016021);; Molecular Function: transferase activity, transferring glycosyl groups (GO:0016757);;	--	--	--	--	Protein of unknown function (DUF616);; Protein of unknown function (DUF616);; Protein of unknown function (DUF616);; Dirigent-like protein	--	S	Function unknown	unnamed protein product [Vitis vinifera]
F01_transcript_17933	[I]	Lipid transport and metabolism	Biological Process: lipid metabolic process (GO:0006629);; Cellular Component: integral component of membrane (GO:0016021);; Molecular Function: oxidoreductase activity, acting on paired donors, with oxidation of a pair of donors resulting in the reduction of molecular oxygen to two molecules of water (GO:0016717);; Molecular Function: delta12-fatty acid dehydrogenase activity (GO:0016720);; Biol…	K10256|0|sot:102580407|K10256 omega-6 fatty acid desaturase / acyl-lipid omega-6 desaturase (Delta-12 desaturase) [EC:1.14.19.6 1.14.19.22] | (RefSeq) delta(12) oleic acid desaturase FAD2-like	ko01040:Biosynthesis of unsaturated fatty acids;ko01212:Fatty acid metabolism	--	--	Fatty acid desaturase;; Domain of unknown function (DUF3474)	Omega-6 fatty acid desaturase, endoplasmic reticulum isozyme 2 GN=FAD2-2 OS=Glycine max (Soybean) PE=2 SV=1	I	Lipid transport and metabolism	fatty acid desaturase [Camellia chekiangoleosa]
F01_transcript_12765	--	--	Biological Process: cellulose microfibril organization (GO:0010215);; Cellular Component: integral component of membrane (GO:0016021);; Biological Process: cell growth (GO:0016049);; Cellular Component: anchored component of membrane (GO:0031225);;	--	--	--	--	COBRA-like protein	Protein COBRA (Precursor) GN=COB OS=Arabidopsis thaliana (Mouse-ear cress) PE=2 SV=1	S	Function unknown	PREDICTED: protein COBRA-like [Sesamum indicum]
F01_transcript_62921	--	--	Molecular Function: aspartic-type endopeptidase activity (GO:0004190);; Cellular Component: nucleus (GO:0005634);; Cellular Component: cytosol (GO:0005829);; Biological Process: proteolysis (GO:0006508);; Molecular Function: polyubiquitin modification-dependent protein binding (GO:0031593);;	K11885|0|pxb:103931491|K11885 DNA damage-inducible protein 1 | (RefSeq) DNA damage-inducible protein 1	--	[L]	Replication, recombination and repair	Aspartyl protease;; gag-polyprotein putative aspartyl protease;; Aspartyl protease;; UBA/TS-N domain;; Retroviral aspartyl protease	--	O	Posttranslational modification, protein turnover, chaperones	PREDICTED: DNA damage-inducible protein 1 [Pyrus x bretschneideri]
F01_transcript_12597	--	--	--	--	--	--	--	--	--	S	Function unknown	PREDICTED: enolase-phosphatase E1 [Vitis vinifera]
F01_transcript_23309	[C]	Energy production and conversion	Cellular Component: mitochondrial proton-transporting ATP synthase complex (GO:0005753);; Cellular Component: plasma membrane (GO:0005886);; Molecular Function: zinc ion binding (GO:0008270);; Cellular Component: chloroplast (GO:0009507);; Biological Process: ATP synthesis coupled proton transport (GO:0015986);; Molecular Function: proton-transporting ATP synthase activity, rotational mechanism (…	K02137|2.09532e-122|pmum:103330470|K02137 F-type H+-transporting ATPase subunit O | (RefSeq) ATP synthase subunit O, mitochondrial	ko00190:Oxidative phosphorylation	[C]	Energy production and conversion	ATP synthase delta (OSCP) subunit	ATP synthase subunit O, mitochondrial (Precursor) OS=Ipomoea batatas (Sweet potato) PE=1 SV=1	C	Energy production and conversion	PREDICTED: ATP synthase subunit O, mitochondrial-like [Nelumbo nucifera]
F01_transcript_73621	[R]	General function prediction only	Molecular Function: GTPase activity (GO:0003924);; Molecular Function: GTP binding (GO:0005525);; Cellular Component: intracellular (GO:0005622);; Cellular Component: plasma membrane (GO:0005886);; Biological Process: small GTPase mediated signal transduction (GO:0007264);; Biological Process: metabolic process (GO:0008152);; Biological Process: response to auxin (GO:0009733);; Biological Process…	K07904|8.88723e-85|vvi:100265921|K07904 Ras-related protein Rab-11A | (RefSeq) ras-related protein Rab11D-like	ko04144:Endocytosis	[U]	Intracellular trafficking, secretion, and vesicular transport	--	Ras-related protein Rab11D GN=RAB11D OS=Lotus japonicus (Lotus corniculatus var. japonicus) PE=2 SV=1	S	Function unknown	PREDICTED: ras-related protein RIC2 [Nelumbo nucifera]
F01_transcript_67974	[G]	Carbohydrate transport and metabolism	Molecular Function: hydrolase activity, hydrolyzing O-glycosyl compounds (GO:0004553);;	K01193|0|cam:101500539|K01193 beta-fructofuranosidase [EC:3.2.1.26] | (RefSeq) beta-fructofuranosidase, insoluble isoenzyme CWINV3-like	ko00052:Galactose metabolism;ko00500:Starch and sucrose metabolism	[G]	Carbohydrate transport and metabolism	Glycosyl hydrolases family 32 N-terminal domain;; Glycosyl hydrolases family 32 N-terminal domain;; Glycosyl hydrolases family 32 C terminal	Beta-fructofuranosidase, insoluble isoenzyme 1 (Precursor) GN=INV1 OS=Daucus carota (Wild carrot) PE=1 SV=1	G	Carbohydrate transport and metabolism	PREDICTED: beta-fructofuranosidase, insoluble isoenzyme CWINV3-like isoform X1 [Cicer arietinum]
F01_transcript_90034	--	--	Molecular Function: calmodulin binding (GO:0005516);; Biological Process: response to stress (GO:0006950);;	--	--	--	--	Calmodulin binding protein-like	--	S	Function unknown	Calmodulin-binding protein isoform 1 [Theobroma cacao]
F01_transcript_18214	--	--	Molecular Function: nucleotide binding (GO:0000166);;	K03243|1.03622e-16|tcc:TCM_001621|K03243 translation initiation factor 5B | (RefSeq) Eukaryotic translation initiation factor 2 family protein isoform 1	ko03013:RNA transport	[J]	Translation, ribosomal structure and biogenesis	--	--	J	Translation, ribosomal structure and biogenesis	Eukaryotic translation initiation factor 2 family protein isoform 1 [Theobroma cacao]
F01_transcript_104030	[M]	Cell wall/membrane/envelope biogenesis	Molecular Function: signal transducer, downstream of receptor, with serine/threonine kinase activity (GO:0004702);; Molecular Function: ATP binding (GO:0005524);; Cellular Component: cytoplasm (GO:0005737);; Cellular Component: plasma membrane (GO:0005886);; Biological Process: signal transduction by protein phosphorylation (GO:0023014);;	K08835|0|vvi:100264532|K08835 serine/threonine-protein kinase OSR1/STK39 [EC:2.7.11.1] | (RefSeq) serine/threonine-protein kinase BLUS1	--	[T]	Signal transduction mechanisms	Protein kinase domain;; Protein tyrosine kinase	Serine/threonine-protein kinase BLUS1 GN=BLUS1 OS=Arabidopsis thaliana (Mouse-ear cress) PE=1 SV=1	T	Signal transduction mechanisms	PREDICTED: serine/threonine-protein kinase BLUS1 [Vitis vinifera]
F01_transcript_38545	--	--	Cellular Component: mitochondrion (GO:0005739);; Cellular Component: plasma membrane (GO:0005886);; Biological Process: GPI anchor biosynthetic process (GO:0006506);; Cellular Component: integral component of membrane (GO:0016021);;	K05293|1.41575e-62|ath:AT1G63110|K05293 phosphatidylinositol glycan, class U | (RefSeq) GPI transamidase subunit PIG-U	ko00563:Glycosylphosphatidylinositol(GPI)-anchor biosynthesis	[R]	General function prediction only	GPI transamidase subunit PIG-U	--	S	Function unknown	cell division cycle protein-related [Arabidopsis thaliana]
F01_transcript_30831	--	--	--	--	--	--	--	--	--	S	Function unknown	hypothetical protein L484_016394 [Morus notabilis]
F01_transcript_87733	--	--	Molecular Function: iron ion transmembrane transporter activity (GO:0005381);; Biological Process: cellular iron ion homeostasis (GO:0006879);; Cellular Component: chloroplast envelope (GO:0009941);; Cellular Component: integral component of membrane (GO:0016021);; Biological Process: iron ion transmembrane transport (GO:0034755);;	--	--	[P]	Inorganic ion transport and metabolism	Ferroportin1 (FPN1);; Ferroportin1 (FPN1)	Solute carrier family 40 member 3, chloroplastic (Precursor) GN=F2P16.6 OS=Arabidopsis thaliana (Mouse-ear cress) PE=1 SV=1	U	Intracellular trafficking, secretion, and vesicular transport	PREDICTED: solute carrier family 40 member 3, chloroplastic-like [Sesamum indicum]
F01_transcript_21202	[M]	Cell wall/membrane/envelope biogenesis	Molecular Function: oxidoreductase activity, acting on the CH-OH group of donors, NAD or NADP as acceptor (GO:0016616);; Biological Process: single-organism metabolic process (GO:0044710);;	--	--	[V]	Defense mechanisms	3-beta hydroxysteroid dehydrogenase/isomerase family;; NAD(P)H-binding;; NAD dependent epimerase/dehydratase family	Tetraketide alpha-pyrone reductase 1 GN=F23E12.20 OS=Arabidopsis thaliana (Mouse-ear cress) PE=2 SV=1	M	Cell wall/membrane/envelope biogenesis	PREDICTED: cinnamoyl-CoA reductase 2 [Sesamum indicum]
F01_transcript_2524	--	--	Molecular Function: GTPase activity (GO:0003924);; Molecular Function: GTP binding (GO:0005525);; Cellular Component: endoplasmic reticulum membrane (GO:0005789);; Cellular Component: integral component of membrane (GO:0016021);;	--	--	[R]	General function prediction only	Root hair defective 3 GTP-binding protein (RHD3);; Guanylate-binding protein, N-terminal domain	Protein ROOT HAIR DEFECTIVE 3 {ECO:0000255|HAMAP-Rule:MF_03109} GN=MCP4.11 OS=Arabidopsis thaliana (Mouse-ear cress) PE=1 SV=1	Z	Cytoskeleton	PREDICTED: protein ROOT HAIR DEFECTIVE 3 {ECO:0000255|HAMAP-Rule:MF_03109}-like isoform X2 [Nicotiana tomentosiformis]
F01_transcript_29694	--	--	Biological Process: endonucleolytic cleavage in ITS1 to separate SSU-rRNA from 5.8S rRNA and LSU-rRNA from tricistronic rRNA transcript (SSU-rRNA, 5.8S rRNA, LSU-rRNA) (GO:0000447);; Biological Process: endonucleolytic cleavage to generate mature 3'-end of SSU-rRNA from (SSU-rRNA, 5.8S rRNA, LSU-rRNA) (GO:0000461);; Molecular Function: structural constituent of ribosome (GO:0003735);; Biological …	K02971|1.88815e-40|sly:101254027|K02971 small subunit ribosomal protein S21e | (RefSeq) 40S ribosomal protein S21-2	ko03010:Ribosome	[J]	Translation, ribosomal structure and biogenesis	Ribosomal protein S21e	40S ribosomal protein S21-2 GN=RPS21C OS=Arabidopsis thaliana (Mouse-ear cress) PE=1 SV=2	J	Translation, ribosomal structure and biogenesis	unnamed protein product [Coffea canephora]
F01_transcript_84200	--	--	Cellular Component: integral component of membrane (GO:0016021);;	--	--	--	--	--	--	S	Function unknown	PREDICTED: restin homolog [Prunus mume]
F01_transcript_115246	--	--	Cellular Component: ubiquitin ligase complex (GO:0000151);; Biological Process: ubiquitin-dependent protein catabolic process (GO:0006511);; Molecular Function: zinc ion binding (GO:0008270);; Biological Process: protein ubiquitination (GO:0016567);; Molecular Function: ubiquitin-ubiquitin ligase activity (GO:0034450);;	K12169|1.08529e-28|sot:102589041|K12169 Kip1 ubiquitination-promoting complex protein 1 [EC:2.3.2.27] | (RefSeq) E3 ubiquitin-protein ligase RKP	--	[A]	RNA processing and modification	--	E3 ubiquitin-protein ligase RKP GN=F7D8.33 OS=Arabidopsis thaliana (Mouse-ear cress) PE=2 SV=2	S	Function unknown	PREDICTED: E3 ubiquitin-protein ligase RKP [Sesamum indicum]
F01_transcript_71716	--	--	Cellular Component: plasma membrane (GO:0005886);; Cellular Component: integral component of membrane (GO:0016021);;	--	--	--	--	Domain of unknown function (DUF588)	CASP-like protein 4A1 GN=At5g40300 OS=Arabidopsis thaliana (Mouse-ear cress) PE=2 SV=1	S	Function unknown	PREDICTED: CASP-like protein 4A3 [Sesamum indicum]
F01_transcript_59365	[T]	Signal transduction mechanisms	Biological Process: signal transduction (GO:0007165);; Cellular Component: membrane (GO:0016020);; Molecular Function: kinase activity (GO:0016301);; Biological Process: phosphorylation (GO:0016310);;	--	--	[T]	Signal transduction mechanisms	Histidine kinase-, DNA gyrase B-, and HSP90-like ATPase;; Response regulator receiver domain	Histidine kinase CKI1 GN=CKI1 OS=Arabidopsis thaliana (Mouse-ear cress) PE=1 SV=1	T	Signal transduction mechanisms	unnamed protein product [Coffea canephora]
F01_transcript_71514	--	--	Cellular Component: mitochondrion (GO:0005739);; Molecular Function: CDP-diacylglycerol-glycerol-3-phosphate 3-phosphatidyltransferase activity (GO:0008444);; Cellular Component: chloroplast envelope (GO:0009941);; Cellular Component: integral component of membrane (GO:0016021);; Biological Process: glycerophospholipid biosynthetic process (GO:0046474);;	K00995|1.86946e-24|sly:101255486|K00995 CDP-diacylglycerol--glycerol-3-phosphate 3-phosphatidyltransferase [EC:2.7.8.5] | (RefSeq) CDP-diacylglycerol--glycerol-3-phosphate 3-phosphatidyltransferase 2	ko00564:Glycerophospholipid metabolism	[I]	Lipid transport and metabolism	--	Cardiolipin synthase, mitochondrial (Precursor) OS=Oryza sativa subsp. japonica (Rice) PE=2 SV=1	I	Lipid transport and metabolism	unnamed protein product [Coffea canephora]
F01_transcript_111013	[R]	General function prediction only	--	--	--	[R]	General function prediction only	WD domain, G-beta repeat;; Anaphase-promoting complex subunit 4 WD40 domain	Transcriptional corepressor LEUNIG GN=LUG OS=Arabidopsis thaliana (Mouse-ear cress) PE=1 SV=2	K	Transcription	hypothetical protein CISIN_1g002471mg [Citrus sinensis]
F01_transcript_131693	--	--	--	K15601|0|sly:101265193|K15601 lysine-specific demethylase 3 [EC:1.14.11.-] | (RefSeq) lysine-specific demethylase JMJ25-like	--	[K]	Transcription	JmjC domain, hydroxylase	Lysine-specific demethylase JMJ25 GN=MLP3.6 OS=Arabidopsis thaliana (Mouse-ear cress) PE=1 SV=1	S	Function unknown	PREDICTED: lysine-specific demethylase JMJ25-like [Nicotiana tomentosiformis]
F01_transcript_100693	--	--	--	K15015|2.94401e-103|cit:102615499|K15015 solute carrier family 32 (vesicular inhibitory amino acid transporter) | (RefSeq) vacuolar amino acid transporter 1	--	[E]	Amino acid transport and metabolism	Transmembrane amino acid transporter protein	Chromophore lyase CRL, chloroplastic GN=K3K7.20 OS=Arabidopsis thaliana (Mouse-ear cress) PE=1 SV=1	E	Amino acid transport and metabolism	hypothetical protein CISIN_1g013919mg [Citrus sinensis]
F01_transcript_106162	--	--	Molecular Function: calcium ion binding (GO:0005509);; Cellular Component: chloroplast thylakoid lumen (GO:0009543);; Cellular Component: chloroplast stroma (GO:0009570);; Cellular Component: photosystem II oxygen evolving complex (GO:0009654);; Biological Process: photosynthesis (GO:0015979);; Cellular Component: extrinsic component of membrane (GO:0019898);; Cellular Component: chloroplast phot…	K02717|6.27382e-69|mus:103990328|K02717 photosystem II oxygen-evolving enhancer protein 2 | (RefSeq) oxygen-evolving enhancer protein 2, chloroplastic-like	ko00195:Photosynthesis	--	--	PsbP	Putative oxygen-evolving enhancer protein 2-2 GN=PSBP2 OS=Arabidopsis thaliana (Mouse-ear cress) PE=5 SV=3	S	Function unknown	PREDICTED: oxygen-evolving enhancer protein 2, chloroplastic-like [Musa acuminata subsp. malaccensis]
F01_transcript_127513	--	--	Cellular Component: nucleus (GO:0005634);; Cellular Component: mitochondrion (GO:0005739);; Cellular Component: chloroplast stroma (GO:0009570);; Cellular Component: chloroplast envelope (GO:0009941);;	--	--	--	--	--	--	S	Function unknown	hypothetical protein JCGZ_09612 [Jatropha curcas]
F01_transcript_135042	--	--	--	--	--	[D]	Cell cycle control, cell division, chromosome partitioning	--	DNA mismatch repair protein MSH6 GN=T10M13.8 OS=Arabidopsis thaliana (Mouse-ear cress) PE=1 SV=2	S	Function unknown	PREDICTED: dentin sialophosphoprotein [Cucumis melo]
F01_transcript_28017	--	--	Cellular Component: ribosome (GO:0005840);;	K02975|2.86687e-40|gmx:100786842|K02975 small subunit ribosomal protein S25e | (RefSeq) 40S ribosomal protein S25-2	ko03010:Ribosome	[J]	Translation, ribosomal structure and biogenesis	S25 ribosomal protein	40S ribosomal protein S25 GN=RPS25 OS=Solanum lycopersicum (Tomato) PE=3 SV=1	J	Translation, ribosomal structure and biogenesis	PREDICTED: 40S ribosomal protein S25-4-like [Tarenaya hassleriana]
F01_transcript_6345	[C]	Energy production and conversion	Cellular Component: mitochondrial inner membrane (GO:0005743);; Biological Process: tricarboxylic acid cycle (GO:0006099);; Molecular Function: succinate dehydrogenase (ubiquinone) activity (GO:0008177);; Biological Process: electron transport chain (GO:0022900);; Molecular Function: flavin adenine dinucleotide binding (GO:0050660);;	K00234|0|mdm:103401555|K00234 succinate dehydrogenase (ubiquinone) flavoprotein subunit [EC:1.3.5.1] | (RefSeq) succinate dehydrogenase [ubiquinone] flavoprotein subunit 1, mitochondrial	ko00020:Citrate cycle (TCA cycle);ko00190:Oxidative phosphorylation;ko01200:Carbon metabolism	[C]	Energy production and conversion	FAD binding domain;; Fumarate reductase flavoprotein C-term	Succinate dehydrogenase [ubiquinone] flavoprotein subunit 1, mitochondrial (Precursor) GN=SDH1-1 OS=Arabidopsis thaliana (Mouse-ear cress) PE=1 SV=1	C	Energy production and conversion	PREDICTED: succinate dehydrogenase [ubiquinone] flavoprotein subunit 1, mitochondrial isoform X2 [Nicotiana sylvestris]
F01_transcript_102850	--	--	Cellular Component: cytosol (GO:0005829);; Biological Process: protein targeting to vacuole (GO:0006623);; Biological Process: ER to Golgi vesicle-mediated transport (GO:0006888);; Cellular Component: extrinsic component of endoplasmic reticulum membrane (GO:0042406);;	K20474|0|vvi:100263828|K20474 RAD50-interacting protein 1 | (RefSeq) RINT1-like protein MAG2	--	[UD]	--	RINT-1 / TIP-1 family	RINT1-like protein MAG2 {ECO:0000305} OS=Arabidopsis thaliana (Mouse-ear cress) PE=1 SV=1	S	Function unknown	PREDICTED: RINT1-like protein MAG2 [Vitis vinifera]
F01_transcript_74950	--	--	--	--	--	--	--	--	--	--	--	hypothetical protein glysoja_037943, partial [Glycine soja]
F01_transcript_89396	--	--	Molecular Function: nucleotide binding (GO:0000166);; Molecular Function: hydrolase activity (GO:0016787);;	K11498|4.62719e-46|vvi:100252135|K11498 centromeric protein E | (RefSeq) kinesin-like protein KIN-7O	--	--	--	--	--	Z	Cytoskeleton	PREDICTED: centromere-associated protein E isoform X2 [Vitis vinifera]
F01_transcript_118069	--	--	Biological Process: chloroplast organization (GO:0009658);; Cellular Component: chloroplast envelope (GO:0009941);; Cellular Component: integral component of membrane (GO:0016021);; Biological Process: protein import into chloroplast stroma (GO:0045037);;	--	--	--	--	Chloroplast envelope transporter	Protein TIC110, chloroplastic (Precursor) GN=TIC110 OS=Arabidopsis thaliana (Mouse-ear cress) PE=1 SV=1	S	Function unknown	PREDICTED: protein TIC110, chloroplastic-like [Cucumis sativus]
F01_transcript_30753	[J]	Translation, ribosomal structure and biogenesis	Molecular Function: nicotinamide-nucleotide adenylyltransferase activity (GO:0000309);; Molecular Function: structural constituent of ribosome (GO:0003735);; Molecular Function: nicotinate-nucleotide adenylyltransferase activity (GO:0004515);; Molecular Function: ATP binding (GO:0005524);; Biological Process: rRNA export from nucleus (GO:0006407);; Biological Process: translation (GO:0006412);; B…	K02979|2.72448e-28|mtr:MTR_6g013210|K02979 small subunit ribosomal protein S28e | (RefSeq) 40S ribosomal protein S28-1	ko03010:Ribosome	[J]	Translation, ribosomal structure and biogenesis	Ribosomal protein S28e	40S ribosomal protein S28 GN=RPS28 OS=Zea mays (Maize) PE=3 SV=1	J	Translation, ribosomal structure and biogenesis	30S ribosomal protein S28e [Medicago truncatula]
F01_transcript_70740	--	--	Molecular Function: protein kinase activity (GO:0004672);; Molecular Function: ATP binding (GO:0005524);; Biological Process: protein phosphorylation (GO:0006468);;	K14500|3.49882e-44|vvi:100245381|K14500 BR-signaling kinase [EC:2.7.11.1] | (RefSeq) probable serine/threonine-protein kinase At4g35230	ko04075:Plant hormone signal transduction	--	--	Leucine Rich Repeat	Probable serine/threonine-protein kinase At4g35230 GN=At4g35230 OS=Arabidopsis thaliana (Mouse-ear cress) PE=1 SV=1	T	Signal transduction mechanisms	PREDICTED: probable serine/threonine-protein kinase At4g35230 isoform X1 [Nicotiana sylvestris]
F01_transcript_8883	--	--	Cellular Component: plasma membrane (GO:0005886);;	K18211|5.8548e-135|sot:102601696|K18211 synaptosomal-associated protein 25 | (RefSeq) SNAP25 homologous protein SNAP33-like	--	[U]	Intracellular trafficking, secretion, and vesicular transport	--	SNAP25 homologous protein SNAP33 OS=Arabidopsis thaliana (Mouse-ear cress) PE=1 SV=1	U	Intracellular trafficking, secretion, and vesicular transport	PREDICTED: SNAP25 homologous protein SNAP33 [Nicotiana sylvestris]
F01_transcript_28364	--	--	--	--	--	--	--	Domain of unknown function (DUF3511)	--	S	Function unknown	hypothetical protein JCGZ_24743 [Jatropha curcas]
F01_transcript_137470	--	--	Molecular Function: DNA binding (GO:0003677);; Molecular Function: RNA binding (GO:0003723);; Molecular Function: helicase activity (GO:0004386);; Molecular Function: ribonuclease III activity (GO:0004525);; Molecular Function: ATP binding (GO:0005524);; Cellular Component: nucleus (GO:0005634);; Cellular Component: cytoplasm (GO:0005737);; Biological Process: rRNA catabolic process (GO:0016075);…	--	--	[A]	RNA processing and modification	--	Endoribonuclease Dicer homolog 1 OS=Oryza sativa subsp. japonica (Rice) PE=3 SV=1	S	Function unknown	unnamed protein product [Vitis vinifera]
F01_transcript_124494	--	--	Cellular Component: integral component of membrane (GO:0016021);;	--	--	--	--	Ferritin-like domain;; Ferritin-like domain	Desiccation-related protein PCC13-62 (Precursor) OS=Craterostigma plantagineum (Blue gem) PE=2 SV=1	S	Function unknown	PREDICTED: desiccation-related protein PCC13-62-like [Nicotiana tomentosiformis]
F01_transcript_61738	--	--	--	--	--	[A]	RNA processing and modification	RING-variant domain;; Protein of unknown function (DUF3675);; Protein of unknown function (DUF3675)	Probable E3 ubiquitin ligase SUD1 GN=F28A23.140 OS=Arabidopsis thaliana (Mouse-ear cress) PE=1 SV=1	O	Posttranslational modification, protein turnover, chaperones	PREDICTED: uncharacterized protein LOC105156268 isoform X1 [Sesamum indicum]
F01_transcript_56700	--	--	Biological Process: telomere maintenance (GO:0000723);; Cellular Component: nuclear chromosome, telomeric region (GO:0000784);; Molecular Function: damaged DNA binding (GO:0003684);; Molecular Function: double-stranded DNA binding (GO:0003690);; Molecular Function: ATP-dependent DNA helicase activity (GO:0004003);; Molecular Function: ATP binding (GO:0005524);; Biological Process: double-strand b…	K10885|0|vvi:100250596|K10885 ATP-dependent DNA helicase 2 subunit 2 | (RefSeq) ATP-dependent DNA helicase 2 subunit KU80	ko03450:Non-homologous end-joining	[L]	Replication, recombination and repair	Ku C terminal domain like;; Ku70/Ku80 beta-barrel domain;; Ku70/Ku80 C-terminal arm;; Ku70/Ku80 beta-barrel domain;; Ku70/Ku80 N-terminal alpha/beta domain	ATP-dependent DNA helicase 2 subunit KU80 GN=KU80 OS=Arabidopsis thaliana (Mouse-ear cress) PE=1 SV=1	L	Replication, recombination and repair	PREDICTED: ATP-dependent DNA helicase 2 subunit KU80-like isoform X3 [Vitis vinifera]
F01_transcript_85638	[M]	Cell wall/membrane/envelope biogenesis	Molecular Function: protein serine/threonine kinase activity (GO:0004674);; Molecular Function: ATP binding (GO:0005524);; Biological Process: protein phosphorylation (GO:0006468);; Molecular Function: tau-protein kinase activity (GO:0050321);;	K14502|4.36074e-176|pmum:103324970|K14502 protein brassinosteroid insensitive 2 [EC:2.7.11.1] | (RefSeq) shaggy-related protein kinase eta	ko04075:Plant hormone signal transduction	[G]	Carbohydrate transport and metabolism	Protein kinase domain;; Protein tyrosine kinase;; Protein kinase domain;; Protein tyrosine kinase	Shaggy-related protein kinase eta GN=F28A21.120 OS=Arabidopsis thaliana (Mouse-ear cress) PE=1 SV=2	T	Signal transduction mechanisms	PREDICTED: shaggy-related protein kinase eta [Prunus mume]
F01_transcript_55170	--	--	Molecular Function: phosphatidylserine decarboxylase activity (GO:0004609);; Molecular Function: calcium ion binding (GO:0005509);; Molecular Function: calcium-dependent phospholipid binding (GO:0005544);; Cellular Component: plasma membrane (GO:0005886);; Cellular Component: integral component of membrane (GO:0016021);; Molecular Function: transferase activity, transferring glycosyl groups (GO:0…	--	--	--	--	--	--	S	Function unknown	uncharacterized protein LOC100273873 [Zea mays]
F01_transcript_73865	--	--	--	K13717|9.8317e-154|sot:102593312|K13717 OTU domain-containing protein 3 [EC:3.4.19.12] | (RefSeq) OTU domain-containing protein 3	--	[TO]	--	OTU-like cysteine protease;; Peptidase C65 Otubain;; SEC-C motif	--	O	Posttranslational modification, protein turnover, chaperones	PREDICTED: OTU domain-containing protein 3 isoform X2 [Solanum lycopersicum]
F01_transcript_113104	--	--	Cellular Component: membrane (GO:0016020);;	K18059|7.91593e-14|sot:102600670|K18059 sulfate transporter 4 | (RefSeq) probable sulfate transporter 4.2	--	[P]	Inorganic ion transport and metabolism	--	Sulfate transporter 4.1, chloroplastic (Precursor) OS=Arabidopsis thaliana (Mouse-ear cress) PE=1 SV=1	P	Inorganic ion transport and metabolism	unnamed protein product [Coffea canephora]
F01_transcript_135180	[J]	Translation, ribosomal structure and biogenesis	Cellular Component: nucleus (GO:0005634);; Biological Process: regulation of transcription, DNA-templated (GO:0006355);;	K11293|6.58742e-34|cit:102617233|K11293 protein HIRA/HIR1 | (RefSeq) protein HIRA	--	[J]	Translation, ribosomal structure and biogenesis	Ribosomal protein L13	Protein HIRA OS=Oryza sativa subsp. japonica (Rice) PE=2 SV=1	K	Transcription	PREDICTED: protein HIRA-like isoform X3 [Citrus sinensis]
F01_transcript_104027	[C]	Energy production and conversion	Molecular Function: cytochrome-c oxidase activity (GO:0004129);; Molecular Function: copper ion binding (GO:0005507);; Cellular Component: mitochondrial inner membrane (GO:0005743);; Cellular Component: integral component of membrane (GO:0016021);; Biological Process: electron transport chain (GO:0022900);; Cellular Component: respiratory chain (GO:0070469);; Biological Process: hydrogen ion tran…	--	--	[C]	Energy production and conversion	Cytochrome C oxidase subunit II, periplasmic domain	Cytochrome c oxidase subunit 2 GN=COX2 OS=Arabidopsis thaliana (Mouse-ear cress) PE=2 SV=2	C	Energy production and conversion	PREDICTED: cytochrome c oxidase subunit 2-like, partial [Solanum tuberosum]
F01_transcript_33529	--	--	--	--	--	--	--	Protein of unknown function (DUF668)	--	S	Function unknown	PREDICTED: uncharacterized protein LOC105166052 [Sesamum indicum]
F01_transcript_95875	--	--	Molecular Function: binding (GO:0005488);; Cellular Component: nuclear pore (GO:0005643);; Biological Process: nucleocytoplasmic transport (GO:0006913);; Biological Process: macromolecule localization (GO:0033036);; Biological Process: organic substance transport (GO:0071702);;	K14297|4.78157e-125|pop:POPTR_0011s15180g|K14297 nuclear pore complex protein Nup98-Nup96 | (RefSeq) nucleoporin family protein	ko03013:RNA transport	[YU]	--	Nucleoporin autopeptidase	Nuclear pore complex protein NUP98A {ECO:0000303|PubMed:21189294} OS=Arabidopsis thaliana (Mouse-ear cress) PE=1 SV=1	U	Intracellular trafficking, secretion, and vesicular transport	PREDICTED: uncharacterized protein DDB_G0274915-like isoform X3 [Nelumbo nucifera]
F01_transcript_119579	--	--	--	--	--	--	--	--	--	S	Function unknown	hypothetical protein PRUPE_ppa000025mg [Prunus persica]
F01_transcript_91509	[P]	Inorganic ion transport and metabolism	Molecular Function: nucleotide binding (GO:0000166);; Molecular Function: phospholipid-translocating ATPase activity (GO:0004012);; Cellular Component: trans-Golgi network (GO:0005802);; Cellular Component: plasma membrane (GO:0005886);; Biological Process: phospholipid transport (GO:0015914);; Molecular Function: metal ion binding (GO:0046872);; Biological Process: Golgi vesicle budding (GO:0048…	K01530|0|cic:CICLE_v10014108mg|K01530 phospholipid-translocating ATPase [EC:3.6.3.1] | (RefSeq) hypothetical protein	--	[R]	General function prediction only	Phospholipid-translocating P-type ATPase C-terminal;; Cation transport ATPase (P-type)	Putative phospholipid-transporting ATPase 8 GN=ALA8 OS=Arabidopsis thaliana (Mouse-ear cress) PE=3 SV=1	U	Intracellular trafficking, secretion, and vesicular transport	hypothetical protein CICLE_v10014108mg [Citrus clementina]
F01_transcript_93976	--	--	Biological Process: proteolysis (GO:0006508);; Molecular Function: cysteine-type peptidase activity (GO:0008234);;	K08592|6.61659e-174|pmum:103323015|K08592 sentrin-specific protease 1 [EC:3.4.22.68] | (RefSeq) ubiquitin-like-specific protease ESD4	--	[O]	Posttranslational modification, protein turnover, chaperones	Ulp1 protease family, C-terminal catalytic domain	Ubiquitin-like-specific protease ESD4 GN=ESD4 OS=Arabidopsis thaliana (Mouse-ear cress) PE=1 SV=1	O	Posttranslational modification, protein turnover, chaperones	PREDICTED: ubiquitin-like-specific protease ESD4 [Prunus mume]
F01_transcript_65575	[T]	Signal transduction mechanisms	Molecular Function: hydrolase activity (GO:0016787);;	--	--	--	--	Alpha/beta hydrolase family;; alpha/beta hydrolase fold;; Serine aminopeptidase, S33	--	S	Function unknown	PREDICTED: uncharacterized protein LOC100248201 [Vitis vinifera]
F01_transcript_24784	--	--	Biological Process: transcription, DNA-templated (GO:0006351);; Cellular Component: intracellular membrane-bounded organelle (GO:0043231);; Biological Process: regulation of cellular process (GO:0050794);;	K09286|1.19351e-43|sot:102605299|K09286 EREBP-like factor | (RefSeq) ethylene-responsive transcription factor 4-like	--	--	--	AP2 domain	Ethylene-responsive transcription factor 4 GN=ERF4 OS=Nicotiana tabacum (Common tobacco) PE=1 SV=1	K	Transcription	RecName: Full=Ethylene-responsive transcription factor 4; AltName: Full=Ethylene-responsive element-binding factor 3; Short=EREBP-3; AltName: Full=Ethylene-responsive element-binding factor 4 homolog; AltName: Full=NtERF3 [Nicotiana tabacum]
F01_transcript_138408	[I]	Lipid transport and metabolism	Biological Process: lipid metabolic process (GO:0006629);; Cellular Component: integral component of membrane (GO:0016021);; Molecular Function: oxidoreductase activity (GO:0016491);;	K10256|1.26798e-146|cmo:103486770|K10256 omega-6 fatty acid desaturase / acyl-lipid omega-6 desaturase (Delta-12 desaturase) [EC:1.14.19.6 1.14.19.22] | (RefSeq) delta(12)-fatty-acid desaturase FAD2	ko01040:Biosynthesis of unsaturated fatty acids;ko01212:Fatty acid metabolism	--	--	Fatty acid desaturase	Omega-6 fatty acid desaturase, endoplasmic reticulum isozyme 2 GN=FAD2-2 OS=Glycine max (Soybean) PE=2 SV=1	I	Lipid transport and metabolism	delta12-fatty acid acetylenase [Hedera helix]
F01_transcript_9237	--	--	Molecular Function: GTPase activator activity (GO:0005096);; Cellular Component: intracellular (GO:0005622);; Biological Process: intracellular protein transport (GO:0006886);; Cellular Component: endomembrane system (GO:0012505);; Cellular Component: integral component of membrane (GO:0016021);; Molecular Function: Rab GTPase binding (GO:0017137);; Biological Process: regulation of vesicle fusio…	--	--	[T]	Signal transduction mechanisms	Rab-GTPase-TBC domain	--	S	Function unknown	PREDICTED: small G protein signaling modulator 2-like isoform X1 [Vitis vinifera]
F01_transcript_123508	[T]	Signal transduction mechanisms	Molecular Function: phosphatidylinositol-4,5-bisphosphate 5-phosphatase activity (GO:0004439);; Molecular Function: protein tyrosine phosphatase activity (GO:0004725);; Molecular Function: protein tyrosine/serine/threonine phosphatase activity (GO:0008138);; Biological Process: peptidyl-tyrosine dephosphorylation (GO:0035335);;	--	--	[V]	Defense mechanisms	--	Putative dual specificity protein phosphatase DSP8 GN=DSP8 OS=Arabidopsis thaliana (Mouse-ear cress) PE=2 SV=2	T	Signal transduction mechanisms	PREDICTED: putative dual specificity protein phosphatase DSP8 [Nicotiana tomentosiformis]
F01_transcript_41909	--	--	Cellular Component: integral component of membrane (GO:0016021);; Molecular Function: cellulose synthase (UDP-forming) activity (GO:0016760);; Biological Process: cellulose biosynthetic process (GO:0030244);; Biological Process: cell wall organization (GO:0071555);;	--	--	--	--	Cellulose synthase;; Cellulose synthase	Cellulose synthase-like protein B4 GN=CSLB4 OS=Arabidopsis thaliana (Mouse-ear cress) PE=3 SV=1	--	--	hypothetical protein EUGRSUZ_K00781 [Eucalyptus grandis]
F01_transcript_139373	--	--	Cellular Component: integral component of membrane (GO:0016021);; Molecular Function: transferase activity, transferring glycosyl groups (GO:0016757);; Cellular Component: intracellular membrane-bounded organelle (GO:0043231);; Cellular Component: cytoplasmic part (GO:0044444);;	--	--	--	--	GDP-fucose protein O-fucosyltransferase;; GDP-fucose protein O-fucosyltransferase	Uncharacterized protein At1g04910 GN=At1g04910 OS=Arabidopsis thaliana (Mouse-ear cress) PE=2 SV=1	S	Function unknown	PREDICTED: uncharacterized protein At1g04910-like isoform X1 [Solanum tuberosum]
F01_transcript_135439	--	--	Molecular Function: RNA binding (GO:0003723);; Molecular Function: structural constituent of ribosome (GO:0003735);; Biological Process: translation (GO:0006412);; Cellular Component: small ribosomal subunit (GO:0015935);;	K02969|2.8926e-21|eus:EUTSA_v10010823mg|K02969 small subunit ribosomal protein S20e | (RefSeq) hypothetical protein	ko03010:Ribosome	[J]	Translation, ribosomal structure and biogenesis	Ribosomal protein S10p/S20e	40S ribosomal protein S20-2 GN=RPS20B OS=Arabidopsis thaliana (Mouse-ear cress) PE=2 SV=1	J	Translation, ribosomal structure and biogenesis	hypothetical protein EUTSA_v10010823mg [Eutrema salsugineum]
F01_transcript_83646	--	--	Biological Process: protein transport (GO:0015031);;	K19476|5.77439e-98|mdm:103411414|K19476 vacuolar protein sorting-associated protein IST1 | (RefSeq) uncharacterized LOC103411414	ko04144:Endocytosis	[Z]	Cytoskeleton	Regulator of Vps4 activity in the MVB pathway	--	S	Function unknown	unnamed protein product [Coffea canephora]
F01_transcript_72006	--	--	Cellular Component: lysosomal membrane (GO:0005765);; Biological Process: signal peptide processing (GO:0006465);; Cellular Component: Golgi-associated vesicle membrane (GO:0030660);; Biological Process: membrane protein proteolysis (GO:0033619);; Molecular Function: aspartic endopeptidase activity, intramembrane cleaving (GO:0042500);; Cellular Component: integral component of cytoplasmic side o…	K09598|1.36534e-112|cit:102616252|K09598 signal peptide peptidase-like 3 [EC:3.4.23.-] | (RefSeq) signal peptide peptidase-like 1	--	[S]	Function unknown	Signal peptide peptidase	Signal peptide peptidase-like 1 GN=SPPL1 OS=Arabidopsis thaliana (Mouse-ear cress) PE=2 SV=1	U	Intracellular trafficking, secretion, and vesicular transport	PREDICTED: signal peptide peptidase-like 1 [Nicotiana tomentosiformis]
F01_transcript_111100	[P]	Inorganic ion transport and metabolism	Biological Process: sulfate assimilation (GO:0000103);; Molecular Function: adenylylsulfate kinase activity (GO:0004020);; Molecular Function: ATP binding (GO:0005524);; Biological Process: phosphorylation (GO:0016310);; Biological Process: single-organism process (GO:0044699);; Biological Process: hydrogen sulfide biosynthetic process (GO:0070814);;	K00860|2.408e-15|vvi:100265880|K00860 adenylylsulfate kinase [EC:2.7.1.25] | (RefSeq) adenylyl-sulfate kinase 3	ko00230:Purine metabolism;ko00920:Sulfur metabolism	[P]	Inorganic ion transport and metabolism	--	Adenylyl-sulfate kinase 3 GN=APK3 OS=Arabidopsis thaliana (Mouse-ear cress) PE=1 SV=1	P	Inorganic ion transport and metabolism	unnamed protein product [Coffea canephora]
F01_transcript_24534	[J]	Translation, ribosomal structure and biogenesis	Molecular Function: mRNA binding (GO:0003729);; Molecular Function: structural constituent of ribosome (GO:0003735);; Biological Process: translation (GO:0006412);; Cellular Component: cytosolic large ribosomal subunit (GO:0022625);;	K02872|1.17107e-127|pda:103709576|K02872 large subunit ribosomal protein L13Ae | (RefSeq) 60S ribosomal protein L13a-4	ko03010:Ribosome	[J]	Translation, ribosomal structure and biogenesis	Ribosomal protein L13	60S ribosomal protein L13a-4 GN=RPL13AD OS=Arabidopsis thaliana (Mouse-ear cress) PE=2 SV=1	J	Translation, ribosomal structure and biogenesis	PREDICTED: 60S ribosomal protein L13a-4 [Phoenix dactylifera]
F01_transcript_124143	--	--	--	--	--	--	--	--	--	S	Function unknown	Uncharacterized protein isoform 2 [Theobroma cacao]
F01_transcript_14744	--	--	Molecular Function: RNA binding (GO:0003723);; Cellular Component: nucleus (GO:0005634);; Molecular Function: metal ion binding (GO:0046872);;	--	--	[R]	General function prediction only	Zinc finger C-x8-C-x5-C-x3-H type (and similar);; RNA-binding, Nab2-type zinc finger;; Zinc finger C-x8-C-x5-C-x3-H type (and similar)	Zinc finger CCCH domain-containing protein 37 GN=HUA1 OS=Arabidopsis thaliana (Mouse-ear cress) PE=1 SV=1	S	Function unknown	PREDICTED: zinc finger CCCH domain-containing protein 37 isoform X1 [Nicotiana sylvestris]
F01_transcript_89947	--	--	Cellular Component: equatorial microtubule organizing center (GO:0000923);; Molecular Function: structural constituent of cytoskeleton (GO:0005200);; Cellular Component: centrosome (GO:0005813);; Cellular Component: spindle pole body (GO:0005816);; Biological Process: meiotic cell cycle (GO:0007126);; Cellular Component: gamma-tubulin ring complex (GO:0008274);; Biological Process: cytoplasmic mi…	K16572|0|pper:PRUPE_ppa000800mg|K16572 gamma-tubulin complex component 5 | (RefSeq) hypothetical protein	--	[S]	Function unknown	Spc97 / Spc98 family	Gamma-tubulin complex component 3 GN=MPH15.2 OS=Arabidopsis thaliana (Mouse-ear cress) PE=1 SV=1	S	Function unknown	hypothetical protein PRUPE_ppa000800mg [Prunus persica]
F01_transcript_95913	[F]	Nucleotide transport and metabolism	Molecular Function: translation initiation factor activity (GO:0003743);; Molecular Function: formate-tetrahydrofolate ligase activity (GO:0004329);; Molecular Function: methenyltetrahydrofolate cyclohydrolase activity (GO:0004477);; Molecular Function: methylenetetrahydrofolate dehydrogenase (NADP+) activity (GO:0004488);; Molecular Function: ATP binding (GO:0005524);; Cellular Component: cytoso…	K01938|0|zma:541944|K01938 formate--tetrahydrofolate ligase [EC:6.3.4.3] | (RefSeq) GRMZM5G824944; formate--tetrahydrofolate ligase	ko00670:One carbon pool by folate;ko01200:Carbon metabolism	[H]	Coenzyme transport and metabolism	Formate--tetrahydrofolate ligase;; Tetrahydrofolate dehydrogenase/cyclohydrolase, NAD(P)-binding domain	Formate--tetrahydrofolate ligase GN=THFS OS=Arabidopsis thaliana (Mouse-ear cress) PE=1 SV=1	H	Coenzyme transport and metabolism	hypothetical protein BC1G_04451 [Botrytis cinerea B05.10]
F01_transcript_107036	--	--	Cellular Component: intracellular part (GO:0044424);;	K12821|0|tcc:TCM_034659|K12821 pre-mRNA-processing factor 40 | (RefSeq) Pre-mRNA-processing protein 40A isoform 1	ko03040:Spliceosome	[A]	RNA processing and modification	FF domain;; WW domain	Pre-mRNA-processing protein 40A OS=Arabidopsis thaliana (Mouse-ear cress) PE=1 SV=1	A	RNA processing and modification	PREDICTED: pre-mRNA-processing protein 40A [Nelumbo nucifera]
F01_transcript_102082	--	--	Cellular Component: membrane (GO:0016020);; Biological Process: cellular protein metabolic process (GO:0044267);; Molecular Function: metal ion binding (GO:0046872);;	--	--	[O]	Posttranslational modification, protein turnover, chaperones	Ring finger domain;; Zinc finger, C3HC4 type (RING finger);; RING-like zinc finger;; RING-H2 zinc finger domain;; Zinc finger, C3HC4 type (RING finger);; zinc-RING finger domain;; Prokaryotic RING finger family 4;; Anaphase-promoting complex subunit 11 RING-H2 finger	RING-H2 finger protein ATL33 GN=ATL33 OS=Arabidopsis thaliana (Mouse-ear cress) PE=2 SV=2	O	Posttranslational modification, protein turnover, chaperones	PREDICTED: RING-H2 finger protein ATL33 [Nicotiana tomentosiformis]
F01_transcript_125931	[J]	Translation, ribosomal structure and biogenesis	Molecular Function: nucleotide binding (GO:0000166);; Molecular Function: RNA binding (GO:0003723);; Cellular Component: nucleus (GO:0005634);; Biological Process: mRNA processing (GO:0006397);;	K13091|3.60156e-161|vvi:100243992|K13091 RNA-binding protein 39 | (RefSeq) RNA-binding protein 39	--	[K]	Transcription	RNA recognition motif. (a.k.a. RRM, RBD, or RNP domain);; linker between RRM2 and RRM3 domains in RBM39 protein;; RNA recognition motif. (a.k.a. RRM, RBD, or RNP domain)	29 kDa ribonucleoprotein A, chloroplastic (Precursor) OS=Nicotiana sylvestris (Wood tobacco) PE=2 SV=1	S	Function unknown	PREDICTED: RNA-binding protein 39 [Sesamum indicum]
F01_transcript_108245	--	--	Cellular Component: intracellular (GO:0005622);; Biological Process: intracellular protein transport (GO:0006886);; Biological Process: vesicle-mediated transport (GO:0016192);;	K20177|4.51232e-58|pop:POPTR_0001s11570g|K20177 vacuolar protein sorting-associated protein 3 | (RefSeq) hypothetical protein	--	[O]	Posttranslational modification, protein turnover, chaperones	--	T-complex protein 1 subunit theta {ECO:0000303|PubMed:11599560} OS=Arabidopsis thaliana (Mouse-ear cress) PE=1 SV=1	U	Intracellular trafficking, secretion, and vesicular transport	PREDICTED: transforming growth factor-beta receptor-associated protein 1-like [Populus euphratica]
F01_transcript_46306	[R]	General function prediction only	Molecular Function: ATP binding (GO:0005524);; Molecular Function: ATPase activity (GO:0016887);;	--	--	[R]	General function prediction only	ABC transporter;; ABC transporter;; AAA domain, putative AbiEii toxin, Type IV TA system;; ATPase family associated with various cellular activities (AAA)	ABC transporter F family member 5 GN=MXK3.6 OS=Arabidopsis thaliana (Mouse-ear cress) PE=2 SV=1	S	Function unknown	PREDICTED: ABC transporter F family member 5 [Vitis vinifera]
F01_transcript_45900	--	--	Molecular Function: actin binding (GO:0003779);; Cellular Component: vacuolar membrane (GO:0005774);; Molecular Function: kinase activity (GO:0016301);; Biological Process: phosphorylation (GO:0016310);;	--	--	--	--	KIP1-like protein	--	S	Function unknown	PREDICTED: putative WEB family protein At1g65010, chloroplastic [Nicotiana tomentosiformis]
F01_transcript_79194	--	--	--	--	--	--	--	--	WPP domain-associated protein (Fragment) GN=WAP OS=Solanum lycopersicum (Tomato) PE=1 SV=1	S	Function unknown	PREDICTED: WPP domain-associated protein [Vitis vinifera]
F01_transcript_58817	--	--	Molecular Function: cysteine-type endopeptidase activity (GO:0004197);; Cellular Component: vacuole (GO:0005773);; Biological Process: vacuolar protein processing (GO:0006624);; Biological Process: proteolysis involved in cellular protein catabolic process (GO:0051603);;	K01369|1.29694e-40|pop:POPTR_0006s24900g|K01369 legumain [EC:3.4.22.34] | (RefSeq) POPTRDRAFT_653937; asparaginyl endopeptidase family protein	--	[O]	Posttranslational modification, protein turnover, chaperones	--	Vacuolar-processing enzyme alpha-isozyme (Precursor) GN=At2g25940 OS=Arabidopsis thaliana (Mouse-ear cress) PE=2 SV=2	O	Posttranslational modification, protein turnover, chaperones	vacuolar processing enzyme a [Populus tomentosa]
F01_transcript_35544	[G]	Carbohydrate transport and metabolism	Biological Process: flavonoid biosynthetic process (GO:0009813);; Cellular Component: intracellular membrane-bounded organelle (GO:0043231);; Biological Process: flavonoid glucuronidation (GO:0052696);; Molecular Function: quercetin 3-O-glucosyltransferase activity (GO:0080043);; Molecular Function: quercetin 7-O-glucosyltransferase activity (GO:0080044);; Biological Process: (-)-secologanin bios…	--	--	[GC]	--	UDP-glucoronosyl and UDP-glucosyl transferase	7-deoxyloganetic acid glucosyltransferase GN=UGT709C2 OS=Catharanthus roseus (Madagascar periwinkle) PE=1 SV=1	S	Function unknown	UGT4 [Panax ginseng]
F01_transcript_130831	--	--	Molecular Function: aspartic-type endopeptidase activity (GO:0004190);; Biological Process: proteolysis (GO:0006508);; Biological Process: protein catabolic process (GO:0030163);; Cellular Component: apoplast (GO:0048046);;	--	--	[O]	Posttranslational modification, protein turnover, chaperones	Xylanase inhibitor C-terminal;; Xylanase inhibitor N-terminal;; Eukaryotic aspartyl protease	Protein ASPARTIC PROTEASE IN GUARD CELL 2 (Precursor) GN=ASPG2 OS=Arabidopsis thaliana (Mouse-ear cress) PE=2 SV=1	O	Posttranslational modification, protein turnover, chaperones	Eukaryotic aspartyl protease family protein [Theobroma cacao]
F01_transcript_81335	--	--	Molecular Function: DNA binding (GO:0003677);; Molecular Function: transcription factor activity, sequence-specific DNA binding (GO:0003700);; Cellular Component: nucleus (GO:0005634);; Biological Process: regulation of transcription, DNA-templated (GO:0006355);; Biological Process: auxin-activated signaling pathway (GO:0009734);; Biological Process: vegetative phase change (GO:0010050);; Biologi…	K14486|0|sot:102582172|K14486 auxin response factor | (RefSeq) auxin response factor 3-like	ko04075:Plant hormone signal transduction	--	--	Auxin response factor;; B3 DNA binding domain	Auxin response factor 3 GN=T1B8.30 OS=Arabidopsis thaliana (Mouse-ear cress) PE=1 SV=2	K	Transcription	auxin response factor 28 [Camellia sinensis]
F01_transcript_84464	--	--	--	--	--	--	--	--	F-box protein At2g16365 GN=At2g16365 OS=Arabidopsis thaliana (Mouse-ear cress) PE=2 SV=2	S	Function unknown	PREDICTED: uncharacterized protein LOC100243604 [Vitis vinifera]
F01_transcript_99432	--	--	Cellular Component: integral component of membrane (GO:0016021);;	--	--	--	--	Protein of unknown function (DUF707);; Protein of unknown function (DUF707)	--	S	Function unknown	hypothetical protein F775_18912 [Aegilops tauschii]
F01_transcript_106863	--	--	--	--	--	--	--	--	--	S	Function unknown	PREDICTED: uncharacterized protein LOC100852824 [Vitis vinifera]
F01_transcript_92560	[CHR]	--	Molecular Function: ATP binding (GO:0005524);; Cellular Component: integral component of membrane (GO:0016021);; Molecular Function: ATPase activity, coupled to transmembrane movement of substances (GO:0042626);; Biological Process: transmembrane transport (GO:0055085);;	--	--	[C]	Energy production and conversion	--	Glycerate dehydrogenase HPR, peroxisomal GN=HPR OS=Arabidopsis thaliana (Mouse-ear cress) PE=1 SV=1	V	Defense mechanisms	ABC transporter C family-like protein [Medicago truncatula]
F01_transcript_134618	--	--	Cellular Component: proteasome complex (GO:0000502);; Cellular Component: integral component of membrane (GO:0016021);; Molecular Function: protein complex scaffold activity (GO:0032947);; Biological Process: proteasome assembly (GO:0043248);;	K11886|0|vvi:100244477|K11886 proteasome component ECM29 | (RefSeq) proteasome-associated protein ECM29 homolog	--	[S]	Function unknown	Proteasome stabiliser;; HEAT-like repeat	--	S	Function unknown	PREDICTED: proteasome-associated protein ECM29 homolog [Vitis vinifera]
F01_transcript_14361	--	--	--	--	--	--	--	G-patch domain	--	S	Function unknown	PREDICTED: uncharacterized protein LOC100245077 isoform X1 [Vitis vinifera]
F01_transcript_2488	--	--	--	--	--	[K]	Transcription	Bromodomain extra-terminal - transcription regulation;; Bromodomain	Transcription factor GTE4 GN=GTE4 OS=Arabidopsis thaliana (Mouse-ear cress) PE=2 SV=1	BK	--	unnamed protein product [Coffea canephora]
F01_transcript_87466	[H]	Coenzyme transport and metabolism	Molecular Function: catalytic activity (GO:0003824);; Cellular Component: endoplasmic reticulum (GO:0005783);; Biological Process: biosynthetic process (GO:0009058);; Cellular Component: integral component of membrane (GO:0016021);; Biological Process: cell growth (GO:0016049);; Molecular Function: pyridoxal phosphate binding (GO:0030170);; Biological Process: regulation of programmed cell death …	K00654|2.1362e-52|vvi:100254626|K00654 serine palmitoyltransferase [EC:2.3.1.50] | (RefSeq) long chain base biosynthesis protein 1	ko00600:Sphingolipid metabolism	[O]	Posttranslational modification, protein turnover, chaperones	--	Long chain base biosynthesis protein 1 OS=Arabidopsis thaliana (Mouse-ear cress) PE=1 SV=1	H	Coenzyme transport and metabolism	hypothetical protein CISIN_1g0115441mg, partial [Citrus sinensis]
F01_transcript_70771	[G]	Carbohydrate transport and metabolism	Molecular Function: glycogen (starch) synthase activity (GO:0004373);; Molecular Function: starch synthase activity (GO:0009011);; Molecular Function: alpha-1,4-glucan synthase activity (GO:0033201);; Molecular Function: starch binding (GO:2001070);;	--	--	--	--	Autophagy protein Atg8 ubiquitin like;; Starch/carbohydrate-binding module (family 53);; Ubiquitin-like autophagy protein Apg12;; Glycosyl transferases group 1;; Starch synthase catalytic domain	Soluble starch synthase 3, chloroplastic/amyloplastic (Precursor) GN=SS3 OS=Solanum tuberosum (Potato) PE=1 SV=1	G	Carbohydrate transport and metabolism	PREDICTED: starch synthase 3, chloroplastic/amyloplastic [Sesamum indicum]
F01_transcript_34227	--	--	--	K09422|5.4187e-45|pda:103703646|K09422 myb proto-oncogene protein, plant | (RefSeq) single myb histone 6-like	--	--	--	Myb-like DNA-binding domain;; Myb-like DNA-binding domain	Telomere repeat-binding factor 1 GN=TRB1 OS=Arabidopsis thaliana (Mouse-ear cress) PE=1 SV=1	K	Transcription	unnamed protein product [Coffea canephora]
F01_transcript_82499	--	--	Molecular Function: superoxide dismutase activity (GO:0004784);; Cellular Component: extracellular region (GO:0005576);; Cellular Component: cell wall (GO:0005618);; Biological Process: removal of superoxide radicals (GO:0019430);; Molecular Function: manganese ion binding (GO:0030145);; Biological Process: oxalate metabolic process (GO:0033609);; Molecular Function: nutrient reservoir activity (…	--	--	--	--	Cupin;; Cupin domain	Putative germin-like protein 2-1 (Precursor) OS=Oryza sativa subsp. japonica (Rice) PE=3 SV=1	S	Function unknown	hypothetical protein PRUPE_ppa017161mg [Prunus persica]
F01_transcript_12102	[KL]	--	Molecular Function: DNA binding (GO:0003677);; Molecular Function: helicase activity (GO:0004386);; Molecular Function: ATP binding (GO:0005524);;	K20092|2.19427e-133|vvi:100247895|K20092 chromodomain-helicase-DNA-binding protein 1-like [EC:3.6.4.12] | (RefSeq) probable helicase CHR10	--	[K]	Transcription	--	CHD3-type chromatin-remodeling factor PICKLE GN=At2g25170 OS=Arabidopsis thaliana (Mouse-ear cress) PE=1 SV=1	L	Replication, recombination and repair	PREDICTED: chromodomain-helicase-DNA-binding protein 1-like isoform X2 [Vitis vinifera]
F01_transcript_2673	[S]	Function unknown	Molecular Function: ATP binding (GO:0005524);; Molecular Function: 1-phosphatidylinositol-4-phosphate 5-kinase activity (GO:0016308);; Biological Process: phosphatidylinositol phosphorylation (GO:0046854);;	K00889|0|pmum:103319080|K00889 1-phosphatidylinositol-4-phosphate 5-kinase [EC:2.7.1.68] | (RefSeq) phosphatidylinositol 4-phosphate 5-kinase 7-like	ko00562:Inositol phosphate metabolism;ko04070:Phosphatidylinositol signaling system;ko04144:Endocytosis	[T]	Signal transduction mechanisms	Phosphatidylinositol-4-phosphate 5-Kinase;; MORN repeat	Phosphatidylinositol 4-phosphate 5-kinase 8 GN=PIP5K8 OS=Arabidopsis thaliana (Mouse-ear cress) PE=1 SV=1	T	Signal transduction mechanisms	PREDICTED: phosphatidylinositol 4-phosphate 5-kinase 8-like [Sesamum indicum]
F01_transcript_143040	[I]	Lipid transport and metabolism	Biological Process: glycerophospholipid metabolic process (GO:0006650);; Molecular Function: O-acyltransferase activity (GO:0008374);; Cellular Component: intrinsic component of membrane (GO:0031224);;	K13511|4.29476e-167|vvi:100252917|K13511 monolysocardiolipin acyltransferase [EC:2.3.1.-] | (RefSeq) tafazzin	ko00564:Glycerophospholipid metabolism	[I]	Lipid transport and metabolism	Acyltransferase	N-acylphosphatidylethanolamine synthase GN=At1g78690 OS=Arabidopsis thaliana (Mouse-ear cress) PE=2 SV=1	I	Lipid transport and metabolism	hypothetical protein VITISV_026039 [Vitis vinifera]
F01_transcript_85864	[P]	Inorganic ion transport and metabolism	Molecular Function: transporter activity (GO:0005215);; Biological Process: transport (GO:0006810);; Cellular Component: integral component of membrane (GO:0016021);;	--	--	[P]	Inorganic ion transport and metabolism	Natural resistance-associated macrophage protein;; Natural resistance-associated macrophage protein	Metal transporter Nramp6 GN=NRAMP6 OS=Arabidopsis thaliana (Mouse-ear cress) PE=2 SV=2	P	Inorganic ion transport and metabolism	NRAMP family metal transporter [Chengiopanax sciadophylloides]
F01_transcript_111899	--	--	Cellular Component: plant-type cell wall (GO:0009505);; Biological Process: response to salt stress (GO:0009651);; Biological Process: multidimensional cell growth (GO:0009825);; Cellular Component: longitudinal side of cell surface (GO:0009930);; Biological Process: cellulose microfibril organization (GO:0010215);; Cellular Component: integral component of membrane (GO:0016021);; Cellular Compon…	--	--	--	--	COBRA-like protein	Protein COBRA (Precursor) GN=COB OS=Arabidopsis thaliana (Mouse-ear cress) PE=2 SV=1	S	Function unknown	PREDICTED: protein COBRA [Nicotiana sylvestris]
F01_transcript_88987	--	--	Molecular Function: binding (GO:0005488);;	K18327|4.10515e-120|cit:102627850|K18327 RNA exonuclease 4 [EC:3.1.-.-] | (RefSeq) RNA exonuclease 4	--	[L]	Replication, recombination and repair	Exonuclease	Small RNA degrading nuclease 1 GN=SDN1 OS=Arabidopsis thaliana (Mouse-ear cress) PE=2 SV=1	L	Replication, recombination and repair	unnamed protein product [Vitis vinifera]
F01_transcript_109841	[C]	Energy production and conversion	Molecular Function: aconitate hydratase activity (GO:0003994);; Molecular Function: copper ion binding (GO:0005507);; Molecular Function: ATP binding (GO:0005524);; Cellular Component: cell wall (GO:0005618);; Cellular Component: mitochondrion (GO:0005739);; Cellular Component: vacuolar membrane (GO:0005774);; Cellular Component: Golgi apparatus (GO:0005794);; Cellular Component: cytosol (GO:0005…	K01681|3.05429e-50|aly:ARALYDRAFT_659083|K01681 aconitate hydratase [EC:4.2.1.3] | (RefSeq) hypothetical protein	ko00020:Citrate cycle (TCA cycle);ko00630:Glyoxylate and dicarboxylate metabolism;ko01200:Carbon metabolism;ko01210:2-Oxocarboxylic acid metabolism;ko01230:Biosynthesis of amino acids	[AJ]	--	Aconitase family (aconitate hydratase)	Aconitate hydratase 2, mitochondrial (Precursor) GN=ACO2 OS=Arabidopsis thaliana (Mouse-ear cress) PE=1 SV=2	C	Energy production and conversion	predicted protein [Arabidopsis lyrata subsp. lyrata]
F01_transcript_34326	--	--	Molecular Function: ATP binding (GO:0005524);; Cellular Component: nucleus (GO:0005634);; Biological Process: regulation of transcription, DNA-templated (GO:0006355);; Molecular Function: histone binding (GO:0042393);;	--	--	[BK]	--	--	Chromatin structure-remodeling complex protein SYD GN=SYD OS=Arabidopsis thaliana (Mouse-ear cress) PE=1 SV=1	L	Replication, recombination and repair	unnamed protein product [Coffea canephora]
F01_transcript_76115	[K]	Transcription	--	K01889|5.94027e-17|eus:EUTSA_v10007412mg|K01889 phenylalanyl-tRNA synthetase alpha chain [EC:6.1.1.20] | (RefSeq) hypothetical protein	ko00970:Aminoacyl-tRNA biosynthesis	[J]	Translation, ribosomal structure and biogenesis	--	Probable phenylalanine--tRNA ligase alpha subunit GN=At4g39280 OS=Arabidopsis thaliana (Mouse-ear cress) PE=2 SV=3	J	Translation, ribosomal structure and biogenesis	hypothetical protein AALP_AA7G270700 [Arabis alpina]
F01_transcript_105057	--	--	Molecular Function: transcription cofactor activity (GO:0003712);; Biological Process: regulation of transcription, DNA-templated (GO:0006355);;	K14972|1.95339e-161|mdm:103417116|K14972 PAX-interacting protein 1 | (RefSeq) mediator of RNA polymerase II transcription subunit 15a-like	--	--	--	--	Mediator of RNA polymerase II transcription subunit 15a GN=F7H2.12 OS=Arabidopsis thaliana (Mouse-ear cress) PE=1 SV=1	S	Function unknown	PREDICTED: mediator of RNA polymerase II transcription subunit 15a-like [Malus domestica]
F01_transcript_35999	--	--	Cellular Component: Golgi membrane (GO:0000139);; Molecular Function: magnesium ion binding (GO:0000287);; Molecular Function: phospholipid-translocating ATPase activity (GO:0004012);; Molecular Function: ATP binding (GO:0005524);; Cellular Component: trans-Golgi network (GO:0005802);; Cellular Component: plasma membrane (GO:0005886);; Cellular Component: integral component of membrane (GO:001602…	K01530|1.93252e-19|gmx:100778710|K01530 phospholipid-translocating ATPase [EC:3.6.3.1] | (RefSeq) probable phospholipid-transporting ATPase 4	--	[R]	General function prediction only	--	Putative phospholipid-transporting ATPase 5 GN=ALA5 OS=Arabidopsis thaliana (Mouse-ear cress) PE=3 SV=1	P	Inorganic ion transport and metabolism	Putative phospholipid-transporting ATPase 4 [Glycine soja]
F01_transcript_81277	--	--	Molecular Function: protein kinase activity (GO:0004672);; Molecular Function: ATP binding (GO:0005524);; Biological Process: protein phosphorylation (GO:0006468);; Cellular Component: integral component of membrane (GO:0016021);;	--	--	--	--	--	--	S	Function unknown	Serine/threonine-protein kinase MHK [Morus notabilis]
F01_transcript_944	--	--	--	K14827|0|vvi:100242503|K14827 pre-rRNA-processing protein IPI1 | (RefSeq) testis-expressed sequence 10 protein homolog	--	[S]	Function unknown	Rix1 complex component involved in 60S ribosome maturation	--	S	Function unknown	PREDICTED: testis-expressed sequence 10 protein homolog isoform X1 [Vitis vinifera]
F01_transcript_78948	--	--	Biological Process: glycolipid metabolic process (GO:0006664);; Cellular Component: endomembrane system (GO:0012505);; Cellular Component: membrane (GO:0016020);; Molecular Function: glucosyltransferase activity (GO:0046527);;	--	--	[R]	General function prediction only	Glycosyl transferase family 90	--	S	Function unknown	PREDICTED: O-glucosyltransferase rumi homolog [Nicotiana sylvestris]
F01_transcript_26329	[FGR]	--	Molecular Function: catalytic activity (GO:0003824);;	K01522|8.05256e-93|gmx:100779544|K01522 bis(5'-adenosyl)-triphosphatase [EC:3.6.1.29] | (RefSeq) bis(5'-adenosyl)-triphosphatase-like	ko00230:Purine metabolism	[FR]	--	HIT domain;; Scavenger mRNA decapping enzyme C-term binding	--	FG	--	PREDICTED: bis(5&apos;-adenosyl)-triphosphatase [Populus euphratica]
F01_transcript_140243	--	--	Cellular Component: integral component of membrane (GO:0016021);;	K01988|2.91137e-23|pxb:103965081|K01988 lactosylceramide 4-alpha-galactosyltransferase [EC:2.4.1.228] | (RefSeq) uncharacterized protein At4g19900-like	ko00603:Glycosphingolipid biosynthesis - globo series	[G]	Carbohydrate transport and metabolism	--	Uncharacterized protein At4g19900 GN=At4g19900 OS=Arabidopsis thaliana (Mouse-ear cress) PE=2 SV=1	S	Function unknown	PREDICTED: uncharacterized protein At4g19900-like isoform X1 [Pyrus x bretschneideri]
F01_transcript_130544	[O]	Posttranslational modification, protein turnover, chaperones	Molecular Function: glutathione transferase activity (GO:0004364);; Cellular Component: cytoplasm (GO:0005737);; Biological Process: glutathione metabolic process (GO:0006749);; Biological Process: toxin catabolic process (GO:0009407);;	K00799|5.50362e-104|vvi:100245369|K00799 glutathione S-transferase [EC:2.5.1.18] | (RefSeq) probable glutathione S-transferase	ko00480:Glutathione metabolism	[O]	Posttranslational modification, protein turnover, chaperones	Glutathione S-transferase, N-terminal domain;; Glutathione S-transferase, N-terminal domain;; Glutathione S-transferase, N-terminal domain;; Glutathione S-transferase, C-terminal domain;; Glutathione S-transferase, C-terminal domain	Glutathione transferase GST 23 OS=Zea mays (Maize) PE=2 SV=1	O	Posttranslational modification, protein turnover, chaperones	unnamed protein product [Coffea canephora]
F01_transcript_77186	--	--	Molecular Function: protein kinase activity (GO:0004672);; Biological Process: protein phosphorylation (GO:0006468);;	--	--	[T]	Signal transduction mechanisms	Protein kinase domain;; Protein tyrosine kinase	Putative proline-rich receptor-like protein kinase PERK11 GN=PERK11 OS=Arabidopsis thaliana (Mouse-ear cress) PE=2 SV=2	T	Signal transduction mechanisms	PREDICTED: inactive protein kinase SELMODRAFT_444075-like [Cucumis sativus]
F01_transcript_42027	[T]	Signal transduction mechanisms	Molecular Function: protein serine/threonine kinase activity (GO:0004674);; Molecular Function: ATP binding (GO:0005524);; Biological Process: protein phosphorylation (GO:0006468);;	K04733|0|sly:101260038|K04733 interleukin-1 receptor-associated kinase 4 [EC:2.7.11.1] | (RefSeq) protein kinase APK1A, chloroplastic	--	[T]	Signal transduction mechanisms	Protein kinase domain;; Protein tyrosine kinase	Protein kinase APK1A, chloroplastic (Precursor) GN=APK1A OS=Arabidopsis thaliana (Mouse-ear cress) PE=2 SV=1	T	Signal transduction mechanisms	PREDICTED: protein kinase APK1A, chloroplastic [Solanum lycopersicum]
F01_transcript_133537	--	--	Cellular Component: endoplasmic reticulum (GO:0005783);; Cellular Component: chloroplast (GO:0009507);; Biological Process: unidimensional cell growth (GO:0009826);; Molecular Function: glucosidase activity (GO:0015926);; Biological Process: cellulose biosynthetic process (GO:0030244);; Molecular Function: carbohydrate binding (GO:0030246);; Biological Process: defense response to bacterium (GO:0…	K05546|6.67919e-67|vvi:100248748|K05546 alpha 1,3-glucosidase [EC:3.2.1.84] | (RefSeq) probable glucan 1,3-alpha-glucosidase	ko00510:N-Glycan biosynthesis;ko04141:Protein processing in endoplasmic reticulum	[GMO]	--	Domain of unknown function (DUF5110)	Probable glucan 1,3-alpha-glucosidase (Precursor) GN=MGI19.5 OS=Arabidopsis thaliana (Mouse-ear cress) PE=1 SV=1	S	Function unknown	PREDICTED: probable glucan 1,3-alpha-glucosidase [Vitis vinifera]
F01_transcript_134280	--	--	Cellular Component: cytosol (GO:0005829);; Biological Process: tricarboxylic acid cycle (GO:0006099);; Molecular Function: phosphoenolpyruvate carboxylase activity (GO:0008964);; Biological Process: carbon fixation (GO:0015977);; Cellular Component: integral component of membrane (GO:0016021);;	K01595|5.8364e-17|gmx:547755|K01595 phosphoenolpyruvate carboxylase [EC:4.1.1.31] | (RefSeq) PEPC17; phosphoenolpyruvate carboxylase	ko00620:Pyruvate metabolism;ko00710:Carbon fixation in photosynthetic organisms;ko01200:Carbon metabolism	--	--	--	Phosphoenolpyruvate carboxylase 4 GN=PPC4 OS=Arabidopsis thaliana (Mouse-ear cress) PE=2 SV=1	C	Energy production and conversion	Phosphoenolpyruvate carboxylase 4 isoform 2 [Theobroma cacao]
F01_transcript_88331	--	--	Molecular Function: DNA binding (GO:0003677);;	--	--	--	--	WRKY DNA -binding domain	Probable WRKY transcription factor 70 GN=WRKY70 OS=Arabidopsis thaliana (Mouse-ear cress) PE=2 SV=1	K	Transcription	WRKY DNA-binding protein 70, putative isoform 1 [Theobroma cacao]
F01_transcript_101864	--	--	Molecular Function: structural constituent of ribosome (GO:0003735);; Biological Process: translation (GO:0006412);; Cellular Component: integral component of membrane (GO:0016021);; Biological Process: transmembrane transport (GO:0055085);;	--	--	[C]	Energy production and conversion	Mitochondrial carrier protein	Mitochondrial adenine nucleotide transporter ADNT1 OS=Arabidopsis thaliana (Mouse-ear cress) PE=2 SV=1	S	Function unknown	PREDICTED: mitochondrial substrate carrier family protein B-like [Sesamum indicum]
F01_transcript_140664	[F]	Nucleotide transport and metabolism	Molecular Function: xanthine dehydrogenase activity (GO:0004854);; Molecular Function: iron ion binding (GO:0005506);; Cellular Component: cytosol (GO:0005829);; Molecular Function: electron carrier activity (GO:0009055);; Biological Process: xanthine catabolic process (GO:0009115);; Molecular Function: oxidoreductase activity, acting on CH-OH group of donors (GO:0016614);; Molecular Function: ox…	K09842|0|vvi:100265098|K09842 abscisic-aldehyde oxidase [EC:1.2.3.14] | (RefSeq) abscisic-aldehyde oxidase	ko00906:Carotenoid biosynthesis	[F]	Nucleotide transport and metabolism	Molybdopterin-binding domain of aldehyde dehydrogenase	Abscisic-aldehyde oxidase GN=F20F1.2 OS=Arabidopsis thaliana (Mouse-ear cress) PE=1 SV=1	F	Nucleotide transport and metabolism	PREDICTED: indole-3-acetaldehyde oxidase [Sesamum indicum]
F01_transcript_62028	[M]	Cell wall/membrane/envelope biogenesis	Molecular Function: protein serine/threonine kinase activity (GO:0004674);; Molecular Function: ATP binding (GO:0005524);; Biological Process: protein phosphorylation (GO:0006468);;	K14502|0|mtr:MTR_2g083940|K14502 protein brassinosteroid insensitive 2 [EC:2.7.11.1] | (RefSeq) shaggy-like kinase dzeta	ko04075:Plant hormone signal transduction	[G]	Carbohydrate transport and metabolism	Protein kinase domain;; Protein tyrosine kinase;; Protein kinase domain;; Protein tyrosine kinase	Shaggy-related protein kinase zeta GN=ASK6 OS=Arabidopsis thaliana (Mouse-ear cress) PE=2 SV=2	T	Signal transduction mechanisms	hypothetical protein CISIN_1g014750mg [Citrus sinensis]
F01_transcript_47897	--	--	--	K15032|2.35587e-44|pmum:103343302|K15032 mTERF domain-containing protein, mitochondrial | (RefSeq) uncharacterized LOC103343302	--	[KR]	--	mTERF;; C-terminus of histone H2A;; HSF-type DNA-binding	Probable histone H2A.3 OS=Medicago truncatula (Barrel medic) PE=1 SV=1	S	Function unknown	PREDICTED: uncharacterized protein LOC103343302 [Prunus mume]
F01_transcript_70538	--	--	Biological Process: response to stress (GO:0006950);;	--	--	--	--	Universal stress protein family	--	S	Function unknown	PREDICTED: uncharacterized protein LOC105174785 [Sesamum indicum]
F01_transcript_105413	--	--	--	--	--	--	--	Protein of unknown function (DUF668);; Domain of unknown function (DUF3475)	--	S	Function unknown	hypothetical protein JCGZ_11970 [Jatropha curcas]
F01_transcript_85964	--	--	Molecular Function: binding (GO:0005488);;	--	--	--	--	Helix-loop-helix DNA-binding domain	Transcription factor bHLH49 GN=T6L1.10 OS=Arabidopsis thaliana (Mouse-ear cress) PE=1 SV=1	K	Transcription	hypothetical protein JCGZ_11799 [Jatropha curcas]
F01_transcript_3359	--	--	Molecular Function: adenosylmethionine decarboxylase activity (GO:0004014);; Biological Process: S-adenosylmethioninamine biosynthetic process (GO:0006557);; Biological Process: spermine biosynthetic process (GO:0006597);; Biological Process: spermidine biosynthetic process (GO:0008295);;	K01611|0|vvi:100240686|K01611 S-adenosylmethionine decarboxylase [EC:4.1.1.50] | (RefSeq) SAMDC; S-adenosylmethionine decarboxylase proenzyme	ko00270:Cysteine and methionine metabolism;ko00330:Arginine and proline metabolism	[T]	Signal transduction mechanisms	Adenosylmethionine decarboxylase;; S-adenosyl-l-methionine decarboxylase leader peptide	S-adenosylmethionine decarboxylase beta chain (Precursor) GN=SAMDC OS=Daucus carota (Wild carrot) PE=2 SV=1	E	Amino acid transport and metabolism	S-adenosylmethionine decarboxylase [Daucus carota]
F01_transcript_69209	[J]	Translation, ribosomal structure and biogenesis	Molecular Function: structural constituent of ribosome (GO:0003735);; Cellular Component: mitochondrion (GO:0005739);; Biological Process: translation (GO:0006412);; Cellular Component: chloroplast (GO:0009507);; Cellular Component: small ribosomal subunit (GO:0015935);; Molecular Function: rRNA binding (GO:0019843);;	K02954|9.75479e-40|gmx:15308527|K02954 small subunit ribosomal protein S14 | (RefSeq) rps14, GlmaxMp08; ribosomal protein subunit S14	ko03010:Ribosome	[J]	Translation, ribosomal structure and biogenesis	Ribosomal protein S20;; Ribosomal protein S14p/S29e	Ribosomal protein S14, mitochondrial GN=RPS14 OS=Vicia faba (Broad bean) PE=3 SV=2	J	Translation, ribosomal structure and biogenesis	ribosomal protein S14 (mitochondrion) [Amborella trichopoda]
F01_transcript_122340	[IQ]	--	Molecular Function: 3-oxoacyl-[acyl-carrier-protein] synthase activity (GO:0004315);; Biological Process: fatty acid biosynthetic process (GO:0006633);;	--	--	[IQ]	--	Beta-ketoacyl synthase, C-terminal domain;; Beta-ketoacyl synthase, N-terminal domain	3-oxoacyl-[acyl-carrier-protein] synthase, mitochondrial (Precursor) GN=KAS OS=Arabidopsis thaliana (Mouse-ear cress) PE=1 SV=1	I	Lipid transport and metabolism	3-oxoacyl-[acyl-carrier-protein] synthase, putative [Ricinus communis]
F01_transcript_92871	[J]	Translation, ribosomal structure and biogenesis	Molecular Function: nucleotide binding (GO:0000166);; Molecular Function: nucleic acid binding (GO:0003676);; Biological Process: mRNA splice site selection (GO:0006376);; Cellular Component: nuclear speck (GO:0016607);; Cellular Component: interchromatin granule (GO:0035061);;	K12890|2.25732e-80|sly:101257012|K12890 splicing factor, arginine/serine-rich 1 | (RefSeq) serine/arginine-rich splicing factor SR30	ko03040:Spliceosome	[A]	RNA processing and modification	RNA recognition motif. (a.k.a. RRM, RBD, or RNP domain)	Serine/arginine-rich-splicing factor SR34 OS=Arabidopsis thaliana (Mouse-ear cress) PE=1 SV=1	S	Function unknown	PREDICTED: serine/arginine-rich splicing factor SR30-like isoform X2 [Vitis vinifera]
F01_transcript_37128	--	--	Molecular Function: protein kinase activity (GO:0004672);; Biological Process: cellular process (GO:0009987);;	--	--	[T]	Signal transduction mechanisms	--	Serine/threonine-protein kinase PEPKR2 GN=PEPKR2 OS=Arabidopsis thaliana (Mouse-ear cress) PE=2 SV=1	T	Signal transduction mechanisms	BnaC08g40980D [Brassica napus]
F01_transcript_26126	--	--	Biological Process: response to stress (GO:0006950);; Biological Process: response to water (GO:0009415);;	--	--	--	--	Dehydrin	--	--	--	dehydrin 5 [Panax ginseng]
F01_transcript_120134	[J]	Translation, ribosomal structure and biogenesis	Molecular Function: RNA binding (GO:0003723);; Cellular Component: plasma membrane (GO:0005886);; Molecular Function: methyltransferase activity (GO:0008168);; Biological Process: methylation (GO:0032259);;	--	--	--	--	S-adenosylmethionine-dependent methyltransferase;; Conserved hypothetical protein 95;; Methyltransferase domain;; Methyltransferase small domain;; Met-10+ like-protein;; Methyltransferase domain;; Ribosomal protein L11 methyltransferase (PrmA);; N-6 DNA Methylase	--	S	Function unknown	PREDICTED: uncharacterized protein LOC103971773 [Musa acuminata subsp. malaccensis]
F01_transcript_127579	[Z]	Cytoskeleton	Cellular Component: nucleolus (GO:0005730);; Biological Process: DNA repair (GO:0006281);; Biological Process: chromatin remodeling (GO:0006338);; Biological Process: regulation of transcription, DNA-templated (GO:0006355);; Cellular Component: Ino80 complex (GO:0031011);; Cellular Component: NuA4 histone acetyltransferase complex (GO:0035267);; Biological Process: pollen sperm cell differentiati…	K11340|0|vvi:100266467|K11340 actin-like protein 6A | (RefSeq) actin-related protein 4	--	[Z]	Cytoskeleton	Actin;; MreB/Mbl protein;; Actin	Actin-related protein 4 GN=ARP4 OS=Arabidopsis thaliana (Mouse-ear cress) PE=1 SV=1	Z	Cytoskeleton	PREDICTED: actin-related protein 4-like isoform X2 [Cicer arietinum]
F01_transcript_15750	[C]	Energy production and conversion	Cellular Component: membrane (GO:0016020);; Molecular Function: oxidoreductase activity, acting on CH-OH group of donors (GO:0016614);; Molecular Function: flavin adenine dinucleotide binding (GO:0050660);; Biological Process: oxidation-reduction process (GO:0055114);;	--	--	--	--	FAD binding domain;; Berberine and berberine like	Reticuline oxidase (Precursor) GN=BBE1 OS=Papaver somniferum (Opium poppy) PE=3 SV=1	C	Energy production and conversion	hypothetical protein JCGZ_24647 [Jatropha curcas]
F01_transcript_131870	--	--	Molecular Function: iron ion transmembrane transporter activity (GO:0005381);; Molecular Function: manganese ion transmembrane transporter activity (GO:0005384);; Cellular Component: endoplasmic reticulum (GO:0005783);; Biological Process: intracellular sequestering of iron ion (GO:0006880);; Cellular Component: ER body (GO:0010168);; Cellular Component: membrane (GO:0016020);; Biological Process…	--	--	--	--	--	Membrane protein of ER body 1 GN=MEB1 OS=Arabidopsis thaliana (Mouse-ear cress) PE=1 SV=1	S	Function unknown	PREDICTED: membrane protein of ER body 1-like [Populus euphratica]
F01_transcript_49636	[T]	Signal transduction mechanisms	Biological Process: MAPK cascade (GO:0000165);; Molecular Function: nucleotide binding (GO:0000166);; Molecular Function: protein serine/threonine kinase activity (GO:0004674);; Cellular Component: membrane (GO:0016020);; Molecular Function: identical protein binding (GO:0042802);;	K04733|0|vvi:100263856|K04733 interleukin-1 receptor-associated kinase 4 [EC:2.7.11.1] | (RefSeq) nodulation receptor kinase	--	--	--	Protein tyrosine kinase;; Protein kinase domain;; Carbohydrate-binding protein of the ER;; Leucine Rich repeats (2 copies);; Leucine rich repeat	Nodulation receptor kinase (Precursor) GN=NORK OS=Pisum sativum (Garden pea) PE=1 SV=1	T	Signal transduction mechanisms	PREDICTED: nodulation receptor kinase-like [Vitis vinifera]
F01_transcript_105607	--	--	Molecular Function: magnesium ion transmembrane transporter activity (GO:0015095);; Biological Process: magnesium ion transport (GO:0015693);; Cellular Component: membrane (GO:0016020);; Biological Process: transmembrane transport (GO:0055085);;	K16075|6.22506e-105|vvi:100249123|K16075 magnesium transporter | (RefSeq) magnesium transporter MRS2-F	--	[P]	Inorganic ion transport and metabolism	--	Magnesium transporter MRS2-F OS=Oryza sativa subsp. japonica (Rice) PE=1 SV=1	U	Intracellular trafficking, secretion, and vesicular transport	PREDICTED: magnesium transporter MRS2-F-like [Vitis vinifera]
F01_transcript_48286	--	--	Cellular Component: integral component of membrane (GO:0016021);;	--	--	--	--	GDP-fucose protein O-fucosyltransferase	--	S	Function unknown	PREDICTED: uncharacterized protein LOC105159921 isoform X1 [Sesamum indicum]
F01_transcript_138155	--	--	Molecular Function: zinc ion binding (GO:0008270);; Molecular Function: ligase activity (GO:0016874);;	K16280|0|csv:101219488|K16280 E3 ubiquitin-protein ligase RGLG [EC:2.3.2.27] | (RefSeq) E3 ubiquitin-protein ligase RGLG2	--	[T]	Signal transduction mechanisms	Copine;; Zinc finger, C3HC4 type (RING finger)	E3 ubiquitin-protein ligase RGLG2 GN=RGLG2 OS=Arabidopsis thaliana (Mouse-ear cress) PE=1 SV=1	S	Function unknown	PREDICTED: E3 ubiquitin-protein ligase RGLG2-like [Cucumis sativus]
F01_transcript_40387	[L]	Replication, recombination and repair	Biological Process: RNA splicing, via transesterification reactions (GO:0000375);; Molecular Function: nucleic acid binding (GO:0003676);; Molecular Function: ATP-dependent RNA helicase activity (GO:0004004);; Molecular Function: ATP binding (GO:0005524);; Cellular Component: U5 snRNP (GO:0005682);; Biological Process: RNA secondary structure unwinding (GO:0010501);; Cellular Component: catalytic…	--	--	[A]	RNA processing and modification	DHHA2 domain	DEAD-box ATP-dependent RNA helicase 21 GN=RH21 OS=Arabidopsis thaliana (Mouse-ear cress) PE=2 SV=1	A	RNA processing and modification	DEAD-box ATP-dependent RNA helicase 21 [Morus notabilis]
F01_transcript_117594	[T]	Signal transduction mechanisms	Molecular Function: calmodulin-dependent protein kinase activity (GO:0004683);; Molecular Function: ATP binding (GO:0005524);; Biological Process: protein phosphorylation (GO:0006468);;	K07359|0|vvi:100260436|K07359 calcium/calmodulin-dependent protein kinase kinase 2 [EC:2.7.11.17] | (RefSeq) serine/threonine-protein kinase GRIK2	--	[T]	Signal transduction mechanisms	Protein kinase domain;; Protein tyrosine kinase;; Kinase-like	Serine/threonine-protein kinase GRIK2 GN=MUF9.18 OS=Arabidopsis thaliana (Mouse-ear cress) PE=1 SV=1	T	Signal transduction mechanisms	PREDICTED: serine/threonine-protein kinase GRIK2 [Vitis vinifera]
F01_transcript_33942	--	--	--	--	--	--	--	Domain of unknown function (DUF966);; Domain of unknown function (DUF966)	Protein UPSTREAM OF FLC GN=UFC OS=Arabidopsis thaliana (Mouse-ear cress) PE=2 SV=1	S	Function unknown	conserved hypothetical protein [Ricinus communis]
F01_transcript_90950	[V]	Defense mechanisms	Molecular Function: 5'-flap endonuclease activity (GO:0017108);; Biological Process: DNA replication, Okazaki fragment processing (GO:0033567);; Molecular Function: single-stranded DNA-dependent ATPase activity (GO:0043142);;	K10742|0|vvi:100247844|K10742 DNA replication ATP-dependent helicase Dna2 [EC:3.6.4.12] | (RefSeq) DNA replication ATP-dependent helicase/nuclease DNA2	ko03030:DNA replication	[L]	Replication, recombination and repair	AAA domain;; AAA domain;; AAA domain;; Domain of unknown function DUF83;; DNA replication factor Dna2;; AAA domain	Probable RNA helicase SDE3 GN=SDE3 OS=Arabidopsis thaliana (Mouse-ear cress) PE=1 SV=1	L	Replication, recombination and repair	PREDICTED: DNA replication ATP-dependent helicase/nuclease DNA2 isoform X4 [Vitis vinifera]
F01_transcript_73320	--	--	Cellular Component: mitochondrial respiratory chain complex III (GO:0005750);; Biological Process: mitochondrial electron transport, ubiquinol to cytochrome c (GO:0006122);; Molecular Function: ubiquinol-cytochrome-c reductase activity (GO:0008121);; Biological Process: aerobic respiration (GO:0009060);; Cellular Component: plastid (GO:0009536);; Biological Process: mitochondrial respiratory chai…	K00417|4.25197e-49|sbi:SORBI_02g006120|K00417 ubiquinol-cytochrome c reductase subunit 7 | (RefSeq) SORBIDRAFT_02g006120, Sb02g006120; hypothetical protein	ko00190:Oxidative phosphorylation	[C]	Energy production and conversion	Ubiquinol-cytochrome C reductase complex 14kD subunit	Cytochrome b-c1 complex subunit 7-2 OS=Arabidopsis thaliana (Mouse-ear cress) PE=1 SV=1	C	Energy production and conversion	PREDICTED: cytochrome b-c1 complex subunit 7 [Sesamum indicum]
F01_transcript_129753	[T]	Signal transduction mechanisms	Molecular Function: calmodulin-dependent protein kinase activity (GO:0004683);; Molecular Function: calmodulin binding (GO:0005516);; Molecular Function: ATP binding (GO:0005524);; Cellular Component: nucleus (GO:0005634);; Cellular Component: cytoplasm (GO:0005737);; Cellular Component: plasma membrane (GO:0005886);; Biological Process: abscisic acid-activated signaling pathway (GO:0009738);; Mo…	--	--	[T]	Signal transduction mechanisms	Protein kinase domain;; Protein tyrosine kinase;; Protein kinase domain;; Protein tyrosine kinase	Calcium-dependent protein kinase 25 GN=CPK25 OS=Arabidopsis thaliana (Mouse-ear cress) PE=2 SV=1	T	Signal transduction mechanisms	Phosphoenolpyruvate carboxylase-related kinase 1 isoform 1 [Theobroma cacao]
F01_transcript_42758	--	--	Cellular Component: spindle microtubule (GO:0005876);; Cellular Component: plasma membrane (GO:0005886);; Cellular Component: cell cortex (GO:0005938);; Biological Process: negative regulation of microtubule depolymerization (GO:0007026);; Biological Process: mitotic cell cycle (GO:0007067);; Cellular Component: plasmodesma (GO:0009506);; Cellular Component: phragmoplast (GO:0009524);; Biological…	K16578|0|vvi:100254930|K16578 CLIP-associating protein 1/2 | (RefSeq) CLIP-associated protein	--	[R]	General function prediction only	Vacuolar 14 Fab1-binding region;; HEAT repeat	CLIP-associated protein GN=T2G17.1/F11A3.25 OS=Arabidopsis thaliana (Mouse-ear cress) PE=1 SV=1	D	Cell cycle control, cell division, chromosome partitioning	PREDICTED: CLIP-associated protein isoform X2 [Vitis vinifera]
F01_transcript_86864	--	--	Cellular Component: membrane (GO:0016020);;	K19026|5.45883e-82|vvi:100247348|K19026 spatacsin | (RefSeq) uncharacterized LOC100247348	--	--	--	--	--	S	Function unknown	unnamed protein product [Vitis vinifera]
F01_transcript_60178	--	--	Biological Process: transport (GO:0006810);; Cellular Component: integral component of membrane (GO:0016021);;	K15287|3.62214e-64|vvi:100256364|K15287 solute carrier family 35, member F1/2 | (RefSeq) solute carrier family 35 member F1	--	[S]	Function unknown	Solute carrier family 35;; Solute carrier family 35	--	EG	--	PREDICTED: solute carrier family 35 member F1-like [Elaeis guineensis]
F01_transcript_4582	--	--	Molecular Function: RNA polymerase II regulatory region sequence-specific DNA binding (GO:0000977);; Molecular Function: transcription factor activity, sequence-specific DNA binding (GO:0003700);; Cellular Component: nucleus (GO:0005634);; Cellular Component: cytosol (GO:0005829);; Biological Process: regulation of transcription from RNA polymerase II promoter (GO:0006357);; Biological Process: p…	--	--	[L]	Replication, recombination and repair	Domain of unknown function (DUF4413);; hAT family C-terminal dimerisation region	Zinc finger BED domain-containing protein DAYSLEEPER GN=HAT OS=Arabidopsis thaliana (Mouse-ear cress) PE=1 SV=1	S	Function unknown	PREDICTED: zinc finger BED domain-containing protein DAYSLEEPER [Sesamum indicum]
F01_transcript_128472	--	--	Molecular Function: nucleic acid binding (GO:0003676);;	--	--	--	--	R3H-associated N-terminal domain	--	S	Function unknown	hypothetical protein CICLE_v10021857mg [Citrus clementina]
F01_transcript_79046	--	--	--	K00826|7.33576e-152|brp:103837593|K00826 branched-chain amino acid aminotransferase [EC:2.6.1.42] | (RefSeq) protein CROWDED NUCLEI 4-like	ko00270:Cysteine and methionine metabolism;ko00280:Valine, leucine and isoleucine degradation;ko00290:Valine, leucine and isoleucine biosynthesis;ko00770:Pantothenate and CoA biosynthesis;ko01210:2-Oxocarboxylic acid metabolism;ko01230:Biosynthesis of amino acids	--	--	--	Putative nuclear matrix constituent protein 1-like protein GN=At5g65770 OS=Arabidopsis thaliana (Mouse-ear cress) PE=2 SV=1	S	Function unknown	unnamed protein product [Coffea canephora]
F01_transcript_2024	--	--	Molecular Function: translation initiation factor activity (GO:0003743);; Biological Process: translational initiation (GO:0006413);;	K11593|0|vvi:100241029|K11593 eukaryotic translation initiation factor 2C | (RefSeq) protein argonaute 4	--	[J]	Translation, ribosomal structure and biogenesis	PAZ domain;; N-terminal domain of argonaute;; Argonaute linker 1 domain;; Argonaute linker 2 domain;; Mid domain of argonaute;; Piwi domain	Protein argonaute 4A GN=P0038F12.13 OS=Oryza sativa subsp. japonica (Rice) PE=2 SV=1	J	Translation, ribosomal structure and biogenesis	PREDICTED: protein argonaute 4 [Vitis vinifera]
F01_transcript_139882	--	--	--	--	--	--	--	--	--	S	Function unknown	hypothetical protein Gasu_05410 [Galdieria sulphuraria]
F01_transcript_53734	[I]	Lipid transport and metabolism	Biological Process: defense response to insect (GO:0002213);; Biological Process: lipid catabolic process (GO:0016042);; Molecular Function: lipase activity (GO:0016298);;	--	--	[I]	Lipid transport and metabolism	Partial alpha/beta-hydrolase lipase region;; alpha/beta hydrolase fold;; Serine aminopeptidase, S33;; Putative esterase	Triacylglycerol lipase 2 (Precursor) GN=LIP2 OS=Arabidopsis thaliana (Mouse-ear cress) PE=2 SV=1	S	Function unknown	unnamed protein product [Coffea canephora]
F01_transcript_95129	[T]	Signal transduction mechanisms	Biological Process: proteolysis (GO:0006508);; Molecular Function: serine-type peptidase activity (GO:0008236);;	--	--	[R]	General function prediction only	Serine aminopeptidase, S33;; Prolyl oligopeptidase family;; Serine hydrolase (FSH1)	--	S	Function unknown	unnamed protein product [Coffea canephora]
F01_transcript_75486	--	--	Molecular Function: DNA binding (GO:0003677);; Cellular Component: nucleus (GO:0005634);;	--	--	[S]	Function unknown	--	Calmodulin-binding transcription activator 2 GN=MSJ1.6 OS=Arabidopsis thaliana (Mouse-ear cress) PE=1 SV=1	K	Transcription	PREDICTED: calmodulin-binding transcription activator 3 [Vitis vinifera]
F01_transcript_12751	[QV]	--	Molecular Function: protein kinase activity (GO:0004672);; Molecular Function: iron ion binding (GO:0005506);; Molecular Function: ATP binding (GO:0005524);; Biological Process: protein phosphorylation (GO:0006468);; Cellular Component: integral component of membrane (GO:0016021);; Molecular Function: oxidoreductase activity, acting on paired donors, with incorporation or reduction of molecular o…	--	--	[Q]	Secondary metabolites biosynthesis, transport and catabolism	Cytochrome P450	Cytochrome P450 81E8 {ECO:0000303|PubMed:14617078} OS=Medicago truncatula (Barrel medic) PE=2 SV=1	Q	Secondary metabolites biosynthesis, transport and catabolism	CYP81Q32 [Catharanthus roseus]
F01_transcript_19861	--	--	Cellular Component: origin recognition complex (GO:0000808);; Cellular Component: nucleus (GO:0005634);; Biological Process: DNA replication (GO:0006260);;	K02604|0|vvi:100253929|K02604 origin recognition complex subunit 2 | (RefSeq) origin of replication complex subunit 2	--	[L]	Replication, recombination and repair	Origin recognition complex subunit 2	Origin of replication complex subunit 2 {ECO:0000303|PubMed:16179646} OS=Arabidopsis thaliana (Mouse-ear cress) PE=1 SV=1	L	Replication, recombination and repair	PREDICTED: origin recognition complex subunit 2 [Vitis vinifera]
F01_transcript_32034	--	--	Biological Process: cytoplasmic translation (GO:0002181);; Molecular Function: structural constituent of ribosome (GO:0003735);; Cellular Component: cytosolic large ribosomal subunit (GO:0022625);; Biological Process: ribosomal large subunit biogenesis (GO:0042273);;	K02898|9.78051e-12|mdm:103455297|K02898 large subunit ribosomal protein L26e | (RefSeq) 60S ribosomal protein L26-1-like	ko03010:Ribosome	[J]	Translation, ribosomal structure and biogenesis	Ribosomal proteins L26 eukaryotic, L24P archaeal	60S ribosomal protein L26-1 GN=RPL26A OS=Arabidopsis thaliana (Mouse-ear cress) PE=2 SV=2	J	Translation, ribosomal structure and biogenesis	PREDICTED: 60S ribosomal protein L26-1-like [Malus domestica]
F01_transcript_121996	--	--	Molecular Function: DNA binding (GO:0003677);; Molecular Function: zinc ion binding (GO:0008270);;	--	--	--	--	--	--	S	Function unknown	PREDICTED: uncharacterized protein LOC100853644 isoform X1 [Vitis vinifera]
F01_transcript_130479	[E]	Amino acid transport and metabolism	Molecular Function: aminopeptidase activity (GO:0004177);; Cellular Component: cytosol (GO:0005829);; Cellular Component: plasma membrane (GO:0005886);; Biological Process: proteolysis (GO:0006508);; Molecular Function: N-1-naphthylphthalamic acid binding (GO:0010013);; Molecular Function: metal ion binding (GO:0046872);;	K01262|5.28584e-172|vvi:100242807|K01262 Xaa-Pro aminopeptidase [EC:3.4.11.9] | (RefSeq) probable Xaa-Pro aminopeptidase P	--	[E]	Amino acid transport and metabolism	Creatinase/Prolidase N-terminal domain;; Metallopeptidase family M24;; C-terminal region of peptidase_M24;; Metallopeptidase family M24	--	E	Amino acid transport and metabolism	PREDICTED: probable Xaa-Pro aminopeptidase P [Vitis vinifera]
F01_transcript_112042	[T]	Signal transduction mechanisms	Molecular Function: protein serine/threonine kinase activity (GO:0004674);; Molecular Function: ATP binding (GO:0005524);; Cellular Component: nucleus (GO:0005634);; Cellular Component: cytosol (GO:0005829);; Cellular Component: plasma membrane (GO:0005886);; Biological Process: protein phosphorylation (GO:0006468);; Biological Process: response to nutrient (GO:0007584);; Biological Process: resp…	--	--	[T]	Signal transduction mechanisms	Protein kinase domain;; Protein tyrosine kinase;; Kinase-like	CBL-interacting serine/threonine-protein kinase 23 GN=At1g30270 OS=Arabidopsis thaliana (Mouse-ear cress) PE=1 SV=1	T	Signal transduction mechanisms	PREDICTED: CBL-interacting protein kinase 04 isoform X1 [Vitis vinifera]
F01_transcript_65871	--	--	--	--	--	--	--	--	--	--	--	hypothetical protein Csa_7G420880 [Cucumis sativus]
F01_transcript_124153	--	--	Cellular Component: cytosol (GO:0005829);; Biological Process: intracellular protein transport (GO:0006886);; Cellular Component: plasmodesma (GO:0009506);; Biological Process: vesicle-mediated transport (GO:0016192);; Cellular Component: membrane coat (GO:0030117);;	K12400|0|vvi:100249377|K12400 AP-4 complex subunit epsilon-1 | (RefSeq) AP-4 complex subunit epsilon	--	[U]	Intracellular trafficking, secretion, and vesicular transport	Adaptin N terminal region;; non-SMC mitotic condensation complex subunit 1;; HEAT repeats;; HEAT repeat	AP-4 complex subunit epsilon GN=At1g31730 OS=Arabidopsis thaliana (Mouse-ear cress) PE=1 SV=1	U	Intracellular trafficking, secretion, and vesicular transport	AP-1 complex subunit gamma-2, putative [Ricinus communis]
F01_transcript_36463	[S]	Function unknown	Cellular Component: integral component of membrane (GO:0016021);;	--	--	--	--	Integral membrane protein DUF92	--	S	Function unknown	PREDICTED: uncharacterized protein LOC104891304 [Beta vulgaris subsp. vulgaris]
F01_transcript_108847	[R]	General function prediction only	Molecular Function: single-stranded RNA binding (GO:0003727);; Biological Process: regulation of gene expression by genetic imprinting (GO:0006349);; Biological Process: DNA mediated transformation (GO:0009294);; Biological Process: leaf morphogenesis (GO:0009965);; Biological Process: vegetative to reproductive phase transition of meristem (GO:0010228);; Molecular Function: histone-lysine N-meth…	K11430|3.54494e-108|mdm:103401443|K11430 histone-lysine N-methyltransferase EZH2 [EC:2.1.1.43] | (RefSeq) histone-lysine N-methyltransferase CLF-like	--	[K]	Transcription	SET domain	Histone-lysine N-methyltransferase CLF GN=At2g23380 OS=Arabidopsis thaliana (Mouse-ear cress) PE=1 SV=2	S	Function unknown	Histone-lysine N-methyltransferase EZ1 [Aegilops tauschii]
F01_transcript_142153	--	--	Cellular Component: integral component of membrane (GO:0016021);;	--	--	[R]	General function prediction only	--	--	S	Function unknown	unnamed protein product [Coffea canephora]
F01_transcript_63523	--	--	Cellular Component: peroxisomal membrane (GO:0005778);; Biological Process: peroxisome organization (GO:0007031);; Cellular Component: membrane part (GO:0044425);;	K13335|7.74932e-150|vvi:100267673|K13335 peroxin-16 | (RefSeq) peroxisome biogenesis protein 16	ko04146:Peroxisome	[U]	Intracellular trafficking, secretion, and vesicular transport	Peroxisomal membrane protein (Pex16)	Peroxisome biogenesis protein 16 GN=F17K2.22 OS=Arabidopsis thaliana (Mouse-ear cress) PE=1 SV=1	S	Function unknown	PREDICTED: peroxisome biogenesis protein 16 [Sesamum indicum]
F01_transcript_37098	--	--	--	--	--	--	--	--	--	S	Function unknown	PREDICTED: uncharacterized protein LOC100266406 [Vitis vinifera]
F01_transcript_58489	[L]	Replication, recombination and repair	Molecular Function: ubiquitin-protein transferase activity (GO:0004842);; Cellular Component: nucleus (GO:0005634);; Cellular Component: cytoplasm (GO:0005737);; Biological Process: protein ubiquitination (GO:0016567);; Molecular Function: transmembrane receptor protein serine/threonine kinase binding (GO:0070696);;	--	--	[S]	Function unknown	Armadillo/beta-catenin-like repeat;; U-box domain;; HEAT repeats	U-box domain-containing protein 14 GN=PUB14 OS=Arabidopsis thaliana (Mouse-ear cress) PE=1 SV=1	S	Function unknown	PREDICTED: U-box domain-containing protein 14 [Nicotiana tomentosiformis]
F01_transcript_37916	--	--	Cellular Component: integral component of membrane (GO:0016021);;	--	--	--	--	--	--	S	Function unknown	PREDICTED: uncharacterized protein LOC100255126 isoform X1 [Vitis vinifera]
F01_transcript_87468	--	--	Cellular Component: nucleus (GO:0005634);; Cellular Component: cytoplasm (GO:0005737);; Biological Process: postreplication repair (GO:0006301);; Molecular Function: ubiquitin protein ligase binding (GO:0031625);; Molecular Function: ubiquitin protein ligase activity (GO:0061630);; Biological Process: protein K63-linked ubiquitination (GO:0070534);;	K10704|3.08826e-93|vvi:100264453|K10704 ubiquitin-conjugating enzyme E2 variant | (RefSeq) ubiquitin-conjugating enzyme E2 variant 1A-like	--	[O]	Posttranslational modification, protein turnover, chaperones	Ubiquitin-conjugating enzyme	Ubiquitin-conjugating enzyme E2 variant 1A GN=F26F24.10 OS=Arabidopsis thaliana (Mouse-ear cress) PE=1 SV=1	O	Posttranslational modification, protein turnover, chaperones	PREDICTED: ubiquitin-conjugating enzyme E2 variant 1A [Vitis vinifera]
F01_transcript_90600	--	--	Cellular Component: U5 snRNP (GO:0005682);;	K13099|2.24761e-105|tcc:TCM_007490|K13099 CD2 antigen cytoplasmic tail-binding protein 2 | (RefSeq) CD2-binding protein-related, putative	--	[R]	General function prediction only	--	--	S	Function unknown	CD2-binding protein-related, putative [Theobroma cacao]
F01_transcript_102706	[K]	Transcription	--	--	--	--	--	Leucine rich repeat	Putative disease resistance protein At4g19050 GN=At4g19050 OS=Arabidopsis thaliana (Mouse-ear cress) PE=3 SV=2	S	Function unknown	PREDICTED: TMV resistance protein N-like isoform X1 [Nelumbo nucifera]
F01_transcript_102376	[P]	Inorganic ion transport and metabolism	Molecular Function: NADPH-hemoprotein reductase activity (GO:0003958);; Cellular Component: endoplasmic reticulum membrane (GO:0005789);; Cellular Component: plastid (GO:0009536);; Molecular Function: FMN binding (GO:0010181);; Cellular Component: integral component of membrane (GO:0016021);; Biological Process: oxidation-reduction process (GO:0055114);;	K00327|2.06936e-102|tcc:TCM_039214|K00327 NADPH-ferrihemoprotein reductase [EC:1.6.2.4] | (RefSeq) P450 reductase 2	--	[C]	Energy production and conversion	Oxidoreductase NAD-binding domain;; FAD binding domain	NADPH--cytochrome P450 reductase GN=CPR OS=Catharanthus roseus (Madagascar periwinkle) PE=2 SV=1	P	Inorganic ion transport and metabolism	CYP450 reductase [Panax ginseng]
F01_transcript_142761	[J]	Translation, ribosomal structure and biogenesis	Biological Process: MAPK cascade (GO:0000165);; Molecular Function: MAP kinase activity (GO:0004707);; Molecular Function: ATP binding (GO:0005524);; Cellular Component: intracellular (GO:0005622);;	K14512|0|pper:PRUPE_ppa006536mg|K14512 mitogen-activated protein kinase 6 [EC:2.7.11.24] | (RefSeq) hypothetical protein	ko04075:Plant hormone signal transduction	[T]	Signal transduction mechanisms	Protein kinase domain;; Protein tyrosine kinase;; Lipopolysaccharide kinase (Kdo/WaaP) family	Mitogen-activated protein kinase homolog NTF4 GN=NTF4 OS=Nicotiana tabacum (Common tobacco) PE=2 SV=1	T	Signal transduction mechanisms	mitogen-activated protein kinase 6 [Petroselinum crispum]
F01_transcript_78967	[P]	Inorganic ion transport and metabolism	Molecular Function: calcium:proton antiporter activity (GO:0015369);; Cellular Component: integral component of membrane (GO:0016021);; Biological Process: calcium ion transmembrane transport (GO:0070588);;	K07300|0|sot:102604967|K07300 Ca2+:H+ antiporter | (RefSeq) vacuolar cation/proton exchanger 3-like	--	[P]	Inorganic ion transport and metabolism	Sodium/calcium exchanger protein	Vacuolar cation/proton exchanger 5 OS=Arabidopsis thaliana (Mouse-ear cress) PE=2 SV=1	P	Inorganic ion transport and metabolism	PREDICTED: vacuolar cation/proton exchanger 3-like [Nicotiana tomentosiformis]
F01_transcript_84910	[Q]	Secondary metabolites biosynthesis, transport and catabolism	Molecular Function: copper ion binding (GO:0005507);; Cellular Component: peroxisome (GO:0005777);; Molecular Function: primary amine oxidase activity (GO:0008131);; Biological Process: amine metabolic process (GO:0009308);; Molecular Function: quinone binding (GO:0048038);; Biological Process: oxidation-reduction process (GO:0055114);;	K00276|5.49566e-47|pda:103697515|K00276 primary-amine oxidase [EC:1.4.3.21] | (RefSeq) primary amine oxidase-like	ko00260:Glycine, serine and threonine metabolism;ko00350:Tyrosine metabolism;ko00360:Phenylalanine metabolism;ko00410:beta-Alanine metabolism;ko00950:Isoquinoline alkaloid biosynthesis;ko00960:Tropane, piperidine and pyridine alkaloid biosynthesis	[Q]	Secondary metabolites biosynthesis, transport and catabolism	Copper amine oxidase, enzyme domain;; WSTF, HB1, Itc1p, MBD9 motif 1	Primary amine oxidase (Precursor; Fragment) OS=Lens culinaris (Lentil) PE=1 SV=3	Q	Secondary metabolites biosynthesis, transport and catabolism	hypothetical protein EUGRSUZ_B032971, partial [Eucalyptus grandis]
F01_transcript_84170	--	--	Cellular Component: 1,3-beta-D-glucan synthase complex (GO:0000148);; Molecular Function: 1,3-beta-D-glucan synthase activity (GO:0003843);; Biological Process: (1->3)-beta-D-glucan biosynthetic process (GO:0006075);; Cellular Component: integral component of membrane (GO:0016021);;	--	--	[M]	Cell wall/membrane/envelope biogenesis	1,3-beta-glucan synthase component;; 1,3-beta-glucan synthase component;; 1,3-beta-glucan synthase component	Callose synthase 3 GN=T24H18.170 OS=Arabidopsis thaliana (Mouse-ear cress) PE=2 SV=3	S	Function unknown	PREDICTED: callose synthase 1 [Sesamum indicum]
F01_transcript_49601	--	--	--	--	--	[K]	Transcription	--	--	S	Function unknown	unnamed protein product [Coffea canephora]
F01_transcript_107519	[T]	Signal transduction mechanisms	Molecular Function: voltage-gated chloride channel activity (GO:0005247);; Cellular Component: trans-Golgi network (GO:0005802);; Biological Process: chloride transport (GO:0006821);; Biological Process: unidimensional cell growth (GO:0009826);; Cellular Component: integral component of membrane (GO:0016021);; Biological Process: regulation of anion transmembrane transport (GO:1903959);;	K05016|0|vvi:100261408|K05016 chloride channel 7 | (RefSeq) chloride channel ClC6	--	[P]	Inorganic ion transport and metabolism	Voltage gated chloride channel;; CBS domain	Chloride channel protein CLC-d OS=Arabidopsis thaliana (Mouse-ear cress) PE=1 SV=2	P	Inorganic ion transport and metabolism	unnamed protein product [Coffea canephora]
F01_transcript_80071	--	--	Cellular Component: integral component of membrane (GO:0016021);; Biological Process: negative regulation of apoptotic process (GO:0043066);;	--	--	[V]	Defense mechanisms	Inhibitor of apoptosis-promoting Bax1	Bax inhibitor 1 GN=BI-1 OS=Arabidopsis thaliana (Mouse-ear cress) PE=1 SV=1	S	Function unknown	PREDICTED: bax inhibitor 1-like [Sesamum indicum]
F01_transcript_118735	--	--	Molecular Function: structural constituent of ribosome (GO:0003735);; Cellular Component: signal peptidase complex (GO:0005787);; Biological Process: translation (GO:0006412);; Biological Process: signal peptide processing (GO:0006465);; Molecular Function: peptidase activity (GO:0008233);; Cellular Component: large ribosomal subunit (GO:0015934);; Cellular Component: integral component of endopl…	K12946|3.95533e-45|fve:101306007|K12946 signal peptidase complex subunit 1 [EC:3.4.-.-] | (RefSeq) probable signal peptidase complex subunit 1	ko03060:Protein export	[U]	Intracellular trafficking, secretion, and vesicular transport	Microsomal signal peptidase 12 kDa subunit (SPC12)	Probable signal peptidase complex subunit 1 GN=At2g22425 OS=Arabidopsis thaliana (Mouse-ear cress) PE=2 SV=1	U	Intracellular trafficking, secretion, and vesicular transport	PREDICTED: probable signal peptidase complex subunit 1-like [Fragaria vesca subsp. vesca]
F01_transcript_12114	--	--	Cellular Component: nucleus (GO:0005634);; Biological Process: RNA splicing (GO:0008380);;	K13109|0|vvi:100264670|K13109 IK cytokine | (RefSeq) suppressor of mec-8 and unc-52 protein homolog 2	--	[T]	Signal transduction mechanisms	RED-like protein N-terminal region;; RED-like protein C-terminal region	Suppressor of mec-8 and unc-52 protein homolog 2 GN=SMU2 OS=Arabidopsis thaliana (Mouse-ear cress) PE=1 SV=1	S	Function unknown	PREDICTED: suppressor of mec-8 and unc-52 protein homolog 2 [Vitis vinifera]
F01_transcript_10939	[M]	Cell wall/membrane/envelope biogenesis	Cellular Component: integral component of membrane (GO:0016021);;	K08678|0|cic:CICLE_v10020167mg|K08678 UDP-glucuronate decarboxylase [EC:4.1.1.35] | (RefSeq) hypothetical protein	ko00500:Starch and sucrose metabolism;ko00520:Amino sugar and nucleotide sugar metabolism	[GM]	--	GDP-mannose 4,6 dehydratase;; NAD dependent epimerase/dehydratase family;; 3-beta hydroxysteroid dehydrogenase/isomerase family;; Male sterility protein;; RmlD substrate binding domain;; Polysaccharide biosynthesis protein	UDP-glucuronic acid decarboxylase 2 GN=F26K9_260 OS=Arabidopsis thaliana (Mouse-ear cress) PE=1 SV=1	M	Cell wall/membrane/envelope biogenesis	PREDICTED: UDP-glucuronic acid decarboxylase 2-like [Nicotiana tomentosiformis]
F01_transcript_44637	--	--	Biological Process: endonucleolytic cleavage in ITS1 to separate SSU-rRNA from 5.8S rRNA and LSU-rRNA from tricistronic rRNA transcript (SSU-rRNA, 5.8S rRNA, LSU-rRNA) (GO:0000447);; Biological Process: endonucleolytic cleavage to generate mature 3'-end of SSU-rRNA from (SSU-rRNA, 5.8S rRNA, LSU-rRNA) (GO:0000461);; Molecular Function: structural constituent of ribosome (GO:0003735);; Biological …	K02971|4.52058e-43|sly:101254027|K02971 small subunit ribosomal protein S21e | (RefSeq) 40S ribosomal protein S21-2	ko03010:Ribosome	[J]	Translation, ribosomal structure and biogenesis	Ribosomal protein S21e	40S ribosomal protein S21-2 GN=RPS21C OS=Arabidopsis thaliana (Mouse-ear cress) PE=1 SV=2	J	Translation, ribosomal structure and biogenesis	unnamed protein product [Coffea canephora]
F01_transcript_84820	--	--	--	--	--	--	--	Protein of unknown function (DUF1664)	--	S	Function unknown	PREDICTED: uncharacterized protein LOC104211437 [Nicotiana sylvestris]
F01_transcript_96065	--	--	--	--	--	--	--	--	--	S	Function unknown	PREDICTED: uncharacterized protein LOC100242269 [Vitis vinifera]
F01_transcript_110152	--	--	Molecular Function: iron ion binding (GO:0005506);; Molecular Function: desacetoxyvindoline 4-hydroxylase activity (GO:0050590);; Biological Process: oxidation-reduction process (GO:0055114);;	--	--	[QR]	--	2OG-Fe(II) oxygenase superfamily	1-aminocyclopropane-1-carboxylate oxidase homolog 11 GN=At5g59530 OS=Arabidopsis thaliana (Mouse-ear cress) PE=2 SV=1	S	Function unknown	PREDICTED: LOW QUALITY PROTEIN: 1-aminocyclopropane-1-carboxylate oxidase homolog 1 [Vitis vinifera]
F01_transcript_88914	--	--	--	--	--	--	--	PHD-finger;; ELM2 domain	Probable aquaporin PIP2-8, N-terminally processed GN=F12A24.3 OS=Arabidopsis thaliana (Mouse-ear cress) PE=1 SV=1	S	Function unknown	PREDICTED: uncharacterized protein LOC100267421 isoform X1 [Vitis vinifera]
F01_transcript_105845	[I]	Lipid transport and metabolism	Biological Process: lipid metabolic process (GO:0006629);; Cellular Component: integral component of membrane (GO:0016021);; Molecular Function: oxidoreductase activity, acting on paired donors, with oxidation of a pair of donors resulting in the reduction of molecular oxygen to two molecules of water (GO:0016717);; Molecular Function: delta12-fatty acid dehydrogenase activity (GO:0016720);; Biol…	K10257|0|vvi:100247097|K10257 acyl-lipid omega-3 desaturase [EC:1.14.19.25 1.14.19.35 1.14.19.36] | (RefSeq) omega-3 fatty acid desaturase, chloroplastic	--	--	--	Domain of unknown function (DUF3474);; Fatty acid desaturase	Omega-3 fatty acid desaturase, chloroplastic (Precursor) GN=FAD7 OS=Sesamum indicum (Oriental sesame) PE=2 SV=1	I	Lipid transport and metabolism	PREDICTED: omega-3 fatty acid desaturase, chloroplastic [Vitis vinifera]
F01_transcript_121672	--	--	Molecular Function: protein serine/threonine/tyrosine kinase activity (GO:0004712);; Biological Process: protein phosphorylation (GO:0006468);; Biological Process: protein transport (GO:0015031);; Cellular Component: integral component of membrane (GO:0016021);;	K19995|9.44519e-173|cit:102621153|K19995 secretory carrier-associated membrane protein | (RefSeq) secretory carrier-associated membrane protein 3	--	[U]	Intracellular trafficking, secretion, and vesicular transport	SCAMP family	Putative secretory carrier-associated membrane protein 1 GN=SCAMP1 OS=Oryza sativa subsp. indica (Rice) PE=3 SV=1	U	Intracellular trafficking, secretion, and vesicular transport	PREDICTED: putative secretory carrier-associated membrane protein 1-like isoform X1 [Citrus sinensis]
F01_transcript_138846	--	--	Cellular Component: spindle (GO:0005819);; Cellular Component: microtubule (GO:0005874);; Biological Process: intracellular protein transport (GO:0006886);; Molecular Function: microtubule binding (GO:0008017);; Cellular Component: plasmodesma (GO:0009506);; Cellular Component: phragmoplast (GO:0009524);; Cellular Component: preprophase band (GO:0009574);; Biological Process: cell plate formation…	K16803|0|vvi:100258505|K16803 cytoskeleton-associated protein 5 | (RefSeq) protein MOR1	--	[Z]	Cytoskeleton	--	Protein MOR1 GN=T20F21.17 OS=Arabidopsis thaliana (Mouse-ear cress) PE=1 SV=1	S	Function unknown	PREDICTED: protein MOR1-like [Vitis vinifera]
F01_transcript_73431	--	--	Cellular Component: vacuolar proton-transporting V-type ATPase, V0 domain (GO:0000220);; Cellular Component: plant-type vacuole (GO:0000325);; Cellular Component: endosome (GO:0005768);; Cellular Component: trans-Golgi network (GO:0005802);; Biological Process: vacuolar acidification (GO:0007035);; Cellular Component: trans-Golgi network transport vesicle membrane (GO:0012510);; Biological Proces…	K02154|3.88815e-17|vvi:100250193|K02154 V-type H+-transporting ATPase subunit a | (RefSeq) V-type proton ATPase subunit a1	ko00190:Oxidative phosphorylation;ko04145:Phagosome	[C]	Energy production and conversion	--	V-type proton ATPase subunit a1 GN=VHA-a1 OS=Arabidopsis thaliana (Mouse-ear cress) PE=2 SV=1	C	Energy production and conversion	PREDICTED: V-type proton ATPase subunit a1 [Beta vulgaris subsp. vulgaris]
F01_transcript_129178	[J]	Translation, ribosomal structure and biogenesis	Molecular Function: RNA binding (GO:0003723);; Molecular Function: structural constituent of ribosome (GO:0003735);; Cellular Component: nucleus (GO:0005634);; Cellular Component: mitochondrial small ribosomal subunit (GO:0005763);; Biological Process: translation (GO:0006412);; Cellular Component: chloroplast thylakoid membrane (GO:0009535);; Cellular Component: chloroplast stroma (GO:0009570);;…	K02988|1.28221e-110|tcc:TCM_029839|K02988 small subunit ribosomal protein S5 | (RefSeq) Ribosomal protein S5 family protein	ko03010:Ribosome	[J]	Translation, ribosomal structure and biogenesis	Ribosomal protein S5, C-terminal domain;; Ribosomal protein S5, N-terminal domain	30S ribosomal protein S5, chloroplastic (Precursor) GN=rps5 OS=Arabidopsis thaliana (Mouse-ear cress) PE=1 SV=1	J	Translation, ribosomal structure and biogenesis	Ribosomal protein S5 family protein [Theobroma cacao]
F01_transcript_73285	--	--	Cellular Component: integral component of membrane (GO:0016021);;	K12864|0|vvi:100261020|K12864 beta-catenin-like protein 1 | (RefSeq) beta-catenin-like protein 1	ko03040:Spliceosome	[S]	Function unknown	--	--	S	Function unknown	PREDICTED: beta-catenin-like protein 1 [Nelumbo nucifera]
F01_transcript_123132	[T]	Signal transduction mechanisms	Molecular Function: ubiquitin-protein transferase activity (GO:0004842);; Biological Process: nucleoside metabolic process (GO:0009116);; Biological Process: protein ubiquitination (GO:0016567);;	--	--	[J]	Translation, ribosomal structure and biogenesis	Ribosomal L22e protein family	Putative E3 ubiquitin-protein ligase LIN OS=Medicago truncatula (Barrel medic) PE=2 SV=1	S	Function unknown	hypothetical protein POPTR_0018s09040g [Populus trichocarpa]
F01_transcript_79745	[G]	Carbohydrate transport and metabolism	Biological Process: flavonoid biosynthetic process (GO:0009813);; Molecular Function: kaempferol 3-O-galactosyltransferase activity (GO:0033834);; Cellular Component: intracellular membrane-bounded organelle (GO:0043231);; Biological Process: flavonoid glucuronidation (GO:0052696);; Molecular Function: quercetin 3-O-glucosyltransferase activity (GO:0080043);; Molecular Function: quercetin 7-O-glu…	K13269|2.72707e-176|sot:102580477|K13269 kaempferol 3-O-beta-D-galactosyltransferase [EC:2.4.1.234] | (RefSeq) kaempferol 3-O-beta-D-galactosyltransferase-like	ko00944:Flavone and flavonol biosynthesis	[GC]	--	UDP-glucoronosyl and UDP-glucosyl transferase	Kaempferol 3-O-beta-D-galactosyltransferase (Precursor) OS=Petunia hybrida (Petunia) PE=1 SV=1	S	Function unknown	UGT14 [Panax ginseng]
F01_transcript_93158	[M]	Cell wall/membrane/envelope biogenesis	Molecular Function: single-stranded RNA binding (GO:0003727);; Cellular Component: vacuolar membrane (GO:0005774);; Biological Process: mRNA processing (GO:0006397);; Biological Process: regulation of translation (GO:0006417);; Biological Process: plastid organization (GO:0009657);; Cellular Component: chloroplast envelope (GO:0009941);; Biological Process: negative regulation of exoribonuclease …	--	--	[R]	General function prediction only	Tetratricopeptide repeat;; Tetratricopeptide repeat;; Tetratricopeptide repeat;; Tetratricopeptide repeat;; Tetratricopeptide repeat;; Tetratricopeptide repeat;; Tetratricopeptide repeat;; Tetratricopeptide repeat	PsbB mRNA maturation factor Mbb1, chloroplastic (Precursor) GN=MBB1 OS=Chlamydomonas reinhardtii (Chlamydomonas smithii) PE=2 SV=1	S	Function unknown	High chlorophyll fluorescent 107 isoform 1 [Theobroma cacao]
F01_transcript_98116	--	--	Molecular Function: alpha-mannosidase activity (GO:0004559);; Cellular Component: extracellular region (GO:0005576);; Cellular Component: vacuolar membrane (GO:0005774);; Cellular Component: cytosol (GO:0005829);; Biological Process: mannose metabolic process (GO:0006013);; Biological Process: protein deglycosylation (GO:0006517);; Molecular Function: zinc ion binding (GO:0008270);; Cellular Comp…	K01191|3.29136e-17|tcc:TCM_046753|K01191 alpha-mannosidase [EC:3.2.1.24] | (RefSeq) Glycosyl hydrolase family 38 protein	ko00511:Other glycan degradation	[G]	Carbohydrate transport and metabolism	--	F-box protein At1g70590 GN=At1g70590 OS=Arabidopsis thaliana (Mouse-ear cress) PE=2 SV=1	G	Carbohydrate transport and metabolism	Lysosomal alpha-mannosidase [Gossypium arboreum]
F01_transcript_140026	--	--	--	--	--	--	--	--	Protein FLX-like 2 GN=F5A8.8 OS=Arabidopsis thaliana (Mouse-ear cress) PE=1 SV=1	S	Function unknown	PREDICTED: protein FLX-like 2 [Vitis vinifera]
F01_transcript_113433	[K]	Transcription	Molecular Function: plastid sigma factor activity (GO:0001053);; Molecular Function: DNA binding (GO:0003677);; Molecular Function: transcription factor activity, sequence-specific DNA binding (GO:0003700);; Biological Process: DNA-templated transcription, initiation (GO:0006352);; Biological Process: regulation of transcription, DNA-templated (GO:0006355);; Cellular Component: chloroplast (GO:00…	--	--	--	--	Sigma-70 region 2;; Sigma-70 region 3	RNA polymerase sigma factor sigA (Precursor) GN=At1g64860 OS=Arabidopsis thaliana (Mouse-ear cress) PE=1 SV=1	K	Transcription	RNA polymerase sigma factor rpoD, putative [Ricinus communis]
F01_transcript_18041	--	--	--	--	--	--	--	F-box domain;; F-box-like;; F-box associated;; F-box associated domain	F-box protein At3g07870 GN=At3g07870 OS=Arabidopsis thaliana (Mouse-ear cress) PE=2 SV=1	S	Function unknown	hypothetical protein POPTR_0002s22050g [Populus trichocarpa]
F01_transcript_126468	--	--	Molecular Function: acid phosphatase activity (GO:0003993);; Cellular Component: vacuolar membrane (GO:0005774);; Cellular Component: endoplasmic reticulum (GO:0005783);; Biological Process: dephosphorylation (GO:0016311);;	K03103|0|cam:101507608|K03103 multiple inositol-polyphosphate phosphatase / 2,3-bisphosphoglycerate 3-phosphatase [EC:3.1.3.62 3.1.3.80] | (RefSeq) multiple inositol polyphosphate phosphatase 1	ko00010:Glycolysis / Gluconeogenesis;ko00562:Inositol phosphate metabolism	[R]	General function prediction only	Histidine phosphatase superfamily (branch 2);; Histidine phosphatase superfamily (branch 2)	--	S	Function unknown	Multiple inositol polyphosphate phosphatase 1 [Morus notabilis]
F01_transcript_97583	[F]	Nucleotide transport and metabolism	Molecular Function: dihydrofolate reductase activity (GO:0004146);; Molecular Function: thymidylate synthase activity (GO:0004799);; Biological Process: dTMP biosynthetic process (GO:0006231);; Biological Process: glycine biosynthetic process (GO:0006545);; Biological Process: one-carbon metabolic process (GO:0006730);; Biological Process: methylation (GO:0032259);; Biological Process: tetrahydro…	K13998|0|tcc:TCM_006844|K13998 dihydrofolate reductase / thymidylate synthase [EC:1.5.1.3 2.1.1.45] | (RefSeq) Thymidylate synthase 1 isoform 1	ko00240:Pyrimidine metabolism;ko00670:One carbon pool by folate;ko00790:Folate biosynthesis	[F]	Nucleotide transport and metabolism	Thymidylate synthase;; Dihydrofolate reductase;; Thymidylate synthase;; FtsJ-like methyltransferase;; Dihydrofolate reductase	Thymidylate synthase OS=Daucus carota (Wild carrot) PE=2 SV=1	H	Coenzyme transport and metabolism	dihydrofolate reductase-thymidylate synthetase precursor [Daucus carota]
F01_transcript_118740	[HI]	--	Molecular Function: 1-deoxy-D-xylulose-5-phosphate synthase activity (GO:0008661);; Biological Process: terpenoid biosynthetic process (GO:0016114);;	K01662|1.71187e-33|pmum:103335117|K01662 1-deoxy-D-xylulose-5-phosphate synthase [EC:2.2.1.7] | (RefSeq) probable 1-deoxy-D-xylulose-5-phosphate synthase 2, chloroplastic	ko00730:Thiamine metabolism;ko00900:Terpenoid backbone biosynthesis	[G]	Carbohydrate transport and metabolism	Glutathione S-transferase, N-terminal domain;; Glutathione S-transferase, N-terminal domain;; Transketolase, C-terminal domain	Probable 1-deoxy-D-xylulose-5-phosphate synthase 2, chloroplastic (Precursor) OS=Oryza sativa subsp. japonica (Rice) PE=2 SV=1	H	Coenzyme transport and metabolism	1-deoxy-D-xylulose-5-phosphate synthase, partial [Camellia sinensis]
F01_transcript_135765	[K]	Transcription	Biological Process: transcription, DNA-templated (GO:0006351);;	K15196|5.81863e-170|tcc:TCM_025810|K15196 transcription factor IIIB 90 kDa subunit | (RefSeq) Cyclin/Brf1-like TBP-binding protein, putative isoform 1	--	[K]	Transcription	Brf1-like TBP-binding domain;; Transcription factor TFIIB repeat	--	K	Transcription	PREDICTED: transcription factor IIIB 70 kDa subunit isoform X1 [Sesamum indicum]
F01_transcript_8498	[O]	Posttranslational modification, protein turnover, chaperones	Molecular Function: ATP binding (GO:0005524);; Cellular Component: cytoplasm (GO:0005737);; Biological Process: protein refolding (GO:0042026);;	--	--	[O]	Posttranslational modification, protein turnover, chaperones	TCP-1/cpn60 chaperonin family	RuBisCO large subunit-binding protein subunit beta, chloroplastic (Precursor) OS=Pisum sativum (Garden pea) PE=1 SV=2	O	Posttranslational modification, protein turnover, chaperones	rubisco subunit binding-protein beta subunit, rubb, putative [Ricinus communis]
F01_transcript_33814	--	--	Cellular Component: nucleus (GO:0005634);; Cellular Component: cytoplasm (GO:0005737);; Biological Process: postreplication repair (GO:0006301);; Molecular Function: ubiquitin protein ligase binding (GO:0031625);; Molecular Function: ubiquitin protein ligase activity (GO:0061630);; Biological Process: protein K63-linked ubiquitination (GO:0070534);;	K10704|5.14424e-92|eus:EUTSA_v10010800mg|K10704 ubiquitin-conjugating enzyme E2 variant | (RefSeq) hypothetical protein	--	[O]	Posttranslational modification, protein turnover, chaperones	Ubiquitin-conjugating enzyme	Ubiquitin-conjugating enzyme E2 variant 1D GN=F22O6.60 OS=Arabidopsis thaliana (Mouse-ear cress) PE=1 SV=1	O	Posttranslational modification, protein turnover, chaperones	hypothetical protein EUTSA_v10010800mg [Eutrema salsugineum]
F01_transcript_76199	--	--	Molecular Function: nucleotide binding (GO:0000166);; Molecular Function: nucleic acid binding (GO:0003676);;	--	--	--	--	--	--	S	Function unknown	unnamed protein product [Coffea canephora]
F01_transcript_64818	--	--	Cellular Component: endosome (GO:0005768);; Cellular Component: trans-Golgi network (GO:0005802);; Biological Process: pollen germination (GO:0009846);; Biological Process: pollen tube growth (GO:0009860);; Cellular Component: membrane (GO:0016020);; Molecular Function: transferase activity (GO:0016740);; Biological Process: macromolecule modification (GO:0043412);; Biological Process: primary me…	--	--	[G]	Carbohydrate transport and metabolism	--	--	S	Function unknown	hypothetical protein JCGZ_26870 [Jatropha curcas]
F01_transcript_121535	[O]	Posttranslational modification, protein turnover, chaperones	Molecular Function: serine-type endopeptidase activity (GO:0004252);; Cellular Component: cell wall (GO:0005618);; Biological Process: proteolysis (GO:0006508);;	--	--	--	--	Peptidase inhibitor I9;; Subtilase family;; Subtilase family	Subtilisin-like protease (Precursor) GN=At5g67360 OS=Arabidopsis thaliana (Mouse-ear cress) PE=1 SV=1	O	Posttranslational modification, protein turnover, chaperones	PREDICTED: LOW QUALITY PROTEIN: subtilisin-like protease-like [Cucumis sativus]
F01_transcript_95609	--	--	Biological Process: microtubule cytoskeleton organization (GO:0000226);; Biological Process: cytokinesis (GO:0000910);; Molecular Function: microtubule binding (GO:0008017);;	K16732|1.23388e-24|sot:102601237|K16732 protein regulator of cytokinesis 1 | (RefSeq) 65-kDa microtubule-associated protein 6-like	--	[DZ]	--	--	65-kDa microtubule-associated protein 6 GN=MAP65-6 OS=Arabidopsis thaliana (Mouse-ear cress) PE=1 SV=1	S	Function unknown	PREDICTED: 65-kDa microtubule-associated protein 6-like isoform X2 [Nicotiana tomentosiformis]
F01_transcript_41830	--	--	--	--	--	--	--	TPL-binding domain in jasmonate signalling	WAT1-related protein At2g37460 GN=At2g37460 OS=Arabidopsis thaliana (Mouse-ear cress) PE=2 SV=1	S	Function unknown	PREDICTED: uncharacterized protein LOC100251629 isoform X1 [Vitis vinifera]
F01_transcript_113885	--	--	--	--	--	--	--	--	--	S	Function unknown	hypothetical protein POPTR_0014s15000g [Populus trichocarpa]
F01_transcript_129910	--	--	--	--	--	--	--	--	Protein FLX-like 1 GN=MIE1.26 OS=Arabidopsis thaliana (Mouse-ear cress) PE=1 SV=1	S	Function unknown	PREDICTED: protein FLX-like 1 [Nelumbo nucifera]
F01_transcript_39426	--	--	Molecular Function: peptidyl-prolyl cis-trans isomerase activity (GO:0003755);; Molecular Function: protein binding (GO:0005515);; Cellular Component: endoplasmic reticulum (GO:0005783);; Cellular Component: cytosol (GO:0005829);; Cellular Component: plasma membrane (GO:0005886);; Cellular Component: plasmodesma (GO:0009506);; Biological Process: regulation of cell cycle (GO:0051726);;	K09578|5.64948e-16|pxb:103933212|K09578 peptidyl-prolyl cis-trans isomerase NIMA-interacting 1 [EC:5.2.1.8] | (RefSeq) peptidyl-prolyl cis-trans isomerase Pin1	--	[O]	Posttranslational modification, protein turnover, chaperones	Domain of unknown function (DUF4033)	Peptidyl-prolyl cis-trans isomerase Pin1 GN=PIN1 OS=Arabidopsis thaliana (Mouse-ear cress) PE=1 SV=1	O	Posttranslational modification, protein turnover, chaperones	PREDICTED: peptidyl-prolyl cis-trans isomerase Pin1 [Pyrus x bretschneideri]
F01_transcript_57816	--	--	--	--	--	--	--	--	Profilin-2 GN=PRO2 OS=Hevea brasiliensis (Para rubber tree) PE=1 SV=1	--	--	PREDICTED: uncharacterized protein LOC100250879 isoform X3 [Vitis vinifera]
F01_transcript_41583	--	--	--	--	--	--	--	--	--	S	Function unknown	PREDICTED: interaptin-like isoform X9 [Solanum tuberosum]
[truncated: 64,279 more rows]

## Sheet: Integrated_Function.anno.2
F01_transcript_130786	--	--	Cellular Component: cytosol (GO:0005829);; Cellular Component: plasmodesma (GO:0009506);;	K12200|0|pper:PRUPE_ppa001185mg|K12200 programmed cell death 6-interacting protein | (RefSeq) hypothetical protein	ko04144:Endocytosis	[R]	General function prediction only	BRO1-like domain;; ALIX V-shaped domain binding to HIV	--	S	Function unknown	PREDICTED: ALG-2 interacting protein X-like [Nicotiana sylvestris]
[truncated: 13,182 more rows]

[truncated: 5 more sheets: Function_anno.stat, GO.list, GO_tree.stat, Kegg.pathway, Kegg.ko]
