# Supplementary material for: A bZIP transcription factor, PqbZIP1, is involved in the plant defense response of American ginseng
Source: PeerJ. 2022 Mar 8;10:e12939. doi: 10.7717/peerj.12939 (PMC8916028; doi:10.7717/peerj.12939)
Supplement: Supplemental Information 13 [file peerj-10-12939-s013.xlsx]

## Sheet: CK1_CK2_CK3_vs_CH1_CH2_CH3.anno
Table S9. The differentially expressed genes induced by chitin													Table S9. The differentially expressed genes affected by chitin
#ID	CK1_Count	CK2_Count	CK3_Count	CH1_Count	CH2_Count	CH3_Count	CK1_FPKM	CK2_FPKM	CK3_FPKM	CH1_FPKM	CH2_FPKM	CH3_FPKM	FDR	log2FC	regulated	COG_class	COG_class_annotation	GO_annotation	KEGG_annotation	KEGG_pathway	KOG_class	KOG_class_annotation	Pfam_annotation	Swissprot_annotation	eggNOG_class	eggNOG_class_annotation	nr_annotation
F01_transcript_55695	32	25	16	122	76	140	0.78	0.65	0.44	3.15	2.15	3.54	0.0304592	2.24035	up	--	--	Molecular Function: microtubule motor activity (GO:0003777);; Molecular Function: ATP binding (GO:0005524);; Cellular Component: kinesin complex (GO:0005871);; Cellular Component: microtubule (GO:0005874);; Biological Process: microtubule-based movement (GO:0007018);; Molecular Function: microtubule binding (GO:0008017);; Molecular Function: ATPase activity (GO:0016887);;	--	--	[Z]	Cytoskeleton	--	Kinesin-like protein NACK1 GN=NACK1 OS=Nicotiana tabacum (Common tobacco) PE=1 SV=1	S	Function unknown	PREDICTED: uncharacterized protein LOC103340535 isoform X1 [Prunus mume]
F01_transcript_74934	170	271	157	19	64	73	5.66	9.34	5.94	0.7	2.51	2.52	0.0180443	-1.90265	down	[Q]	Secondary metabolites biosynthesis, transport and catabolism	Cellular Component: vacuolar membrane (GO:0005774);; Cellular Component: Golgi apparatus (GO:0005794);; Cellular Component: plasma membrane (GO:0005886);; Cellular Component: plasmodesma (GO:0009506);; Biological Process: carotene catabolic process (GO:0016121);; Biological Process: xanthophyll catabolic process (GO:0016124);; Molecular Function: 9-cis-epoxycarotenoid dioxygenase activity (GO:004…	K11159|0|pper:PRUPE_ppa003814mg|K11159 carotenoid cleavage dioxygenase | (RefSeq) hypothetical protein	--	[Q]	Secondary metabolites biosynthesis, transport and catabolism	Retinal pigment epithelial membrane protein;; Retinal pigment epithelial membrane protein;; Retinal pigment epithelial membrane protein	Carotenoid 9,10(9&apos;,10&apos;)-cleavage dioxygenase 1 GN=CCD1 OS=Pisum sativum (Garden pea) PE=2 SV=1	Q	Secondary metabolites biosynthesis, transport and catabolism	hypothetical protein PRUPE_ppa003814mg [Prunus persica]
F01_transcript_18229	212	129	171	65	0	44	8.59	5.43	7.83	2.8	0	1.86	0.00513647	-2.23735	down	[T]	Signal transduction mechanisms	Molecular Function: translation initiation factor activity (GO:0003743);; Biological Process: translational initiation (GO:0006413);;	--	--	--	--	Protein of unknown function (DUF1350)	--	S	Function unknown	PREDICTED: uncharacterized protein LOC100257842 isoform X2 [Vitis vinifera]
F01_transcript_84356	154	265	240	77	26	10	2.69	4.79	4.75	1.43	0.54	0.19	0.000698162	-2.52247	down	[J]	Translation, ribosomal structure and biogenesis	Cellular Component: endoplasmic reticulum membrane (GO:0005789);; Cellular Component: integral component of membrane (GO:0016021);; Cellular Component: endoplasmic reticulum tubular network (GO:0071782);; Biological Process: endoplasmic reticulum tubular network organization (GO:0071786);;	--	--	--	--	--	Uncharacterized protein At2g24330 GN=At2g24330 OS=Arabidopsis thaliana (Mouse-ear cress) PE=2 SV=1	S	Function unknown	PREDICTED: uncharacterized protein At2g24330-like [Populus euphratica]
F01_transcript_3374	178	225	95	13	0	53	3.63	4.77	2.21	0.29	0	1.13	0.00518306	-2.91046	down	--	--	--	K14432|2.02955e-136|vvi:100243434|K14432 ABA responsive element binding factor | (RefSeq) ABSCISIC ACID-INSENSITIVE 5-like protein 5	ko04075:Plant hormone signal transduction	--	--	bZIP transcription factor;; Basic region leucine zipper;; bZIP Maf transcription factor	ABSCISIC ACID-INSENSITIVE 5-like protein 6 OS=Arabidopsis thaliana (Mouse-ear cress) PE=1 SV=1	K	Transcription	PREDICTED: ABSCISIC ACID-INSENSITIVE 5-like protein 5 isoform X2 [Vitis vinifera]
F01_transcript_53859	0	0	0	36	67	148	0	0	0	1.16	2.34	4.57	0.00249306	Inf	up	[I]	Lipid transport and metabolism	Molecular Function: phospholipase D activity (GO:0004630);; Molecular Function: calcium ion binding (GO:0005509);; Cellular Component: vacuole (GO:0005773);; Cellular Component: endoplasmic reticulum (GO:0005783);; Cellular Component: plasma membrane (GO:0005886);; Cellular Component: plastid (GO:0009536);; Molecular Function: nucleotidyltransferase activity (GO:0016779);; Biological Process: pho…	K01115|0|pop:POPTR_0003s02730g|K01115 phospholipase D1/2 [EC:3.1.4.4] | (RefSeq) phospholipase D family protein	ko00564:Glycerophospholipid metabolism;ko00565:Ether lipid metabolism;ko04144:Endocytosis	[I]	Lipid transport and metabolism	Phospholipase D C terminal;; Phospholipase D Active site motif;; PLD-like domain	Phospholipase D alpha 1 {ECO:0000250|UniProtKB:Q41142} OS=Carica papaya (Papaya) PE=1 SV=1	I	Lipid transport and metabolism	PREDICTED: phospholipase D alpha 1 [Sesamum indicum]
F01_transcript_25521	90	27	56	0	0	0	7.7	2.41	5.4	0	0	0	0.000137582	#NAME?	down	--	--	Molecular Function: SNARE binding (GO:0000149);; Molecular Function: SNAP receptor activity (GO:0005484);; Biological Process: exocytosis (GO:0006887);; Biological Process: vesicle fusion (GO:0006906);; Cellular Component: integral component of membrane (GO:0016021);; Cellular Component: SNARE complex (GO:0031201);;	K08511|3.66745e-124|vvi:100252829|K08511 vesicle-associated membrane protein 72 | (RefSeq) vesicle-associated membrane protein 722	--	[U]	Intracellular trafficking, secretion, and vesicular transport	Synaptobrevin	Vesicle-associated membrane protein 721 OS=Arabidopsis thaliana (Mouse-ear cress) PE=1 SV=1	U	Intracellular trafficking, secretion, and vesicular transport	unnamed protein product [Coffea canephora]
F01_transcript_143180	81	96	60	26	17	0	2.15	2.63	1.81	0.74	0.55	0	0.0403403	-2.40935	down	--	--	Molecular Function: structural constituent of ribosome (GO:0003735);; Cellular Component: nucleus (GO:0005634);; Biological Process: translation (GO:0006412);; Cellular Component: cytosolic large ribosomal subunit (GO:0022625);;	K15901|4.14133e-30|fve:101296552|K15901 EKC/KEOPS complex subunit CGI121/TPRKB | (RefSeq) EKC/KEOPS complex subunit Tprkb	--	[J]	Translation, ribosomal structure and biogenesis	Ribosomal proteins 50S-L18Ae/60S-L20/60S-L18A	60S ribosomal protein L18a OS=Oryza sativa subsp. japonica (Rice) PE=2 SV=1	S	Function unknown	PREDICTED: TP53RK-binding protein-like [Fragaria vesca subsp. vesca]
F01_transcript_94484	741	567	1475	2	2	6	19.99	15.86	45.07	0.06	0.07	0.18	2.49e-05	-8.15007	down	[O]	Posttranslational modification, protein turnover, chaperones	Molecular Function: ATP binding (GO:0005524);; Molecular Function: 2-alkenal reductase [NAD(P)] activity (GO:0032440);; Biological Process: oxidation-reduction process (GO:0055114);;	--	--	[O]	Posttranslational modification, protein turnover, chaperones	Hsp70 protein;; MreB/Mbl protein	Heat shock cognate 70 kDa protein 2 GN=HSC-2 OS=Solanum lycopersicum (Tomato) PE=1 SV=1	O	Posttranslational modification, protein turnover, chaperones	heat shock protein, putative [Ricinus communis]
F01_transcript_115209	179	326	122	0	0	0	5.24	9.86	4.04	0	0	0	3.61e-09	#NAME?	down	[R]	General function prediction only	Biological Process: regulation of transcription, DNA-templated (GO:0006355);;	--	--	[R]	General function prediction only	WD domain, G-beta repeat;; Anaphase-promoting complex subunit 4 WD40 domain	Protein TOPLESS GN=F7H2.9 OS=Arabidopsis thaliana (Mouse-ear cress) PE=1 SV=1	S	Function unknown	PREDICTED: protein TOPLESS [Sesamum indicum]
F01_transcript_13368	90	72	121	391	449	328	2.87	2.39	4.38	13.18	16.68	10.82	0.000142682	2.05707	up	[J]	Translation, ribosomal structure and biogenesis	Cellular Component: cytoplasm (GO:0005737);; Biological Process: translational termination (GO:0006415);; Molecular Function: translation release factor activity, codon specific (GO:0016149);;	K03265|0|cmo:103498902|K03265 peptide chain release factor subunit 1 | (RefSeq) eukaryotic peptide chain release factor subunit 1-3-like	ko03015:mRNA surveillance pathway	[J]	Translation, ribosomal structure and biogenesis	eRF1 domain 2;; eRF1 domain 3;; eRF1 domain 1	Eukaryotic peptide chain release factor subunit 1-3 GN=ERF1-3 OS=Arabidopsis thaliana (Mouse-ear cress) PE=1 SV=1	J	Translation, ribosomal structure and biogenesis	PREDICTED: eukaryotic peptide chain release factor subunit 1-3-like [Cucumis melo]
F01_transcript_10216	206	0	78	279	395	405	5.83	0	2.51	8.32	12.94	11.81	0.0338524	1.95009	up	--	--	--	--	--	--	--	UBA-like domain (DUF1421)	--	S	Function unknown	PREDICTED: ataxin-2 homolog [Nicotiana tomentosiformis]
F01_transcript_60892	383	241	331	0	111	45	19.08	12.39	18.66	0	6.55	2.33	0.000111322	-2.56789	down	[I]	Lipid transport and metabolism	Biological Process: vitamin E biosynthetic process (GO:0010189);; Biological Process: methylation (GO:0032259);; Molecular Function: 2-methyl-6-phytyl-1,4-benzoquinone methyltransferase activity (GO:0051741);;	K05928|5.8398e-170|sly:778248|K05928 tocopherol O-methyltransferase [EC:2.1.1.95] | (RefSeq) TMT; gamma-tocopherol methyltransferase	ko00130:Ubiquinone and other terpenoid-quinone biosynthesis	[IR]	--	Methyltransferase domain;; Methyltransferase domain;; Methyltransferase domain;; Methyltransferase domain;; Mycolic acid cyclopropane synthetase;; Methyltransferase domain;; ubiE/COQ5 methyltransferase family	Probable tocopherol O-methyltransferase, chloroplastic (Precursor) GN=OJ1111_E07.25 OS=Oryza sativa subsp. japonica (Rice) PE=2 SV=1	S	Function unknown	PREDICTED: probable tocopherol O-methyltransferase, chloroplastic isoform X1 [Nicotiana tomentosiformis]
F01_transcript_11035	0	0	0	96	69	204	0	0	0	2.93	2.33	6.07	1.08e-05	Inf	up	--	--	Cellular Component: preribosome (GO:0030684);; Biological Process: nucleic acid metabolic process (GO:0090304);;	K14849|3.16443e-171|tcc:TCM_034656|K14849 ribosomal RNA-processing protein 1 | (RefSeq) Ribosomal RNA processing protein 1 B, putative	--	--	--	Nucleolar protein,Nop52	--	J	Translation, ribosomal structure and biogenesis	Ribosomal RNA processing protein 1 B, putative [Theobroma cacao]
F01_transcript_8884	132	80	41	0	0	0	3.6	2.27	1.28	0	0	0	9.81e-06	#NAME?	down	[O]	Posttranslational modification, protein turnover, chaperones	Molecular Function: nucleotide binding (GO:0000166);; Molecular Function: DNA binding (GO:0003677);; Molecular Function: nucleoside-triphosphatase activity (GO:0017111);;	K04485|0|vvi:100258398|K04485 DNA repair protein RadA/Sms | (RefSeq) DNA repair protein RadA	--	--	--	AAA domain;; KaiC;; DnaB-like helicase C terminal domain;; ATPase family associated with various cellular activities (AAA)	--	O	Posttranslational modification, protein turnover, chaperones	PREDICTED: uncharacterized protein LOC100258398 [Vitis vinifera]
F01_transcript_144761	0	0	0	214	114	40	0	0	0	6.03	3.54	1.1	0.00296619	Inf	up	--	--	--	--	--	[A]	RNA processing and modification	--	Protein RIK OS=Zea mays (Maize) PE=1 SV=1	S	Function unknown	PREDICTED: protein RIK isoform X1 [Nelumbo nucifera]
F01_transcript_73052	45	38	36	10	0	0	1.14	1	1.04	0.29	0	0	0.00513647	-3.55644	down	--	--	--	--	--	[R]	General function prediction only	PPR repeat family;; PPR repeat;; PPR repeat;; Pentatricopeptide repeat domain;; Pentacotripeptide-repeat region of PRORP	Pentatricopeptide repeat-containing protein At3g16010 GN=At3g16010 OS=Arabidopsis thaliana (Mouse-ear cress) PE=2 SV=1	S	Function unknown	PREDICTED: pentatricopeptide repeat-containing protein At3g16010 [Vitis vinifera]
F01_transcript_111561	92	73	35	23	0	1	2.82	2.32	1.25	0.76	0	0.04	0.0437205	-3.02352	down	[D]	Cell cycle control, cell division, chromosome partitioning	Biological Process: double-strand break repair via homologous recombination (GO:0000724);; Biological Process: sister chromatid cohesion (GO:0007062);; Cellular Component: plasmodesma (GO:0009506);; Cellular Component: Smc5-Smc6 complex (GO:0030915);; Biological Process: resolution of recombination intermediates (GO:0071139);;	--	--	[BDL]	--	--	Structural maintenance of chromosomes protein 5 GN=F1N13.60 OS=Arabidopsis thaliana (Mouse-ear cress) PE=2 SV=1	D	Cell cycle control, cell division, chromosome partitioning	PREDICTED: structural maintenance of chromosomes protein 5 [Vitis vinifera]
F01_transcript_38848	60	0	104	303	349	273	1.93	0	3.77	10.24	12.99	9.03	4.77e-06	2.47049	up	--	--	--	K12893|1.04461e-84|vvi:100255597|K12893 splicing factor, arginine/serine-rich 4/5/6 | (RefSeq) serine/arginine-rich splicing factor RS41	ko03040:Spliceosome	[A]	RNA processing and modification	RNA recognition motif. (a.k.a. RRM, RBD, or RNP domain);; RNA recognition motif. (a.k.a. RRM, RBD, or RNP domain)	Serine/arginine-rich splicing factor RS41 GN=MSG15.12 OS=Arabidopsis thaliana (Mouse-ear cress) PE=1 SV=2	S	Function unknown	Arginine/serine-rich-splicing factor RSP40 [Morus notabilis]
F01_transcript_60261	337	760	173	7	6	10	6.94	16.26	4.05	0.17	0.15	0.22	0.0438882	-5.73738	down	[C]	Energy production and conversion	Molecular Function: inorganic diphosphatase activity (GO:0004427);; Molecular Function: hydrogen-translocating pyrophosphatase activity (GO:0009678);; Biological Process: proton transport (GO:0015992);; Cellular Component: integral component of membrane (GO:0016021);; Biological Process: transmembrane transport (GO:0055085);;	K01507|0|vvi:100256710|K01507 inorganic pyrophosphatase [EC:3.6.1.1] | (RefSeq) pyrophosphate-energized vacuolar membrane proton pump	ko00190:Oxidative phosphorylation	--	--	Inorganic H+ pyrophosphatase	Pyrophosphate-energized vacuolar membrane proton pump OS=Vigna radiata var. radiata (Mung bean) PE=1 SV=4	C	Energy production and conversion	PREDICTED: pyrophosphate-energized vacuolar membrane proton pump [Vitis vinifera]
F01_transcript_64960	11	0	0	62	50	70	0.5	0	0	2.74	2.5	3.05	6.05e-05	4.10828	up	--	--	--	--	--	--	--	Stress-induced protein Di19, C-terminal;; Drought induced 19 protein (Di19), zinc-binding	Protein DEHYDRATION-INDUCED 19 homolog 3 GN=DI19-3 OS=Arabidopsis thaliana (Mouse-ear cress) PE=1 SV=1	S	Function unknown	PREDICTED: protein DEHYDRATION-INDUCED 19 homolog 4-like [Nicotiana sylvestris]
F01_transcript_115146	145	58	125	284	519	398	2.41	1.01	2.36	4.98	9.9	6.8	0.0479653	1.89096	up	[J]	Translation, ribosomal structure and biogenesis	Molecular Function: structural constituent of ribosome (GO:0003735);; Molecular Function: rRNA binding (GO:0019843);; Cellular Component: cytosolic small ribosomal subunit (GO:0022627);; Biological Process: positive regulation of translational fidelity (GO:0045903);;	K02997|3.38471e-40|sot:102577830|K02997 small subunit ribosomal protein S9e | (RefSeq) uncharacterized LOC102577830	ko03010:Ribosome	[J]	Translation, ribosomal structure and biogenesis	SRP54-type protein, GTPase domain;; S4 domain	40S ribosomal protein S9-2 GN=RPS9C OS=Arabidopsis thaliana (Mouse-ear cress) PE=2 SV=1	J	Translation, ribosomal structure and biogenesis	40S ribosomal protein s9, partial [Camellia sinensis]
F01_transcript_129280	69	40	136	260	419	308	2.28	1.37	5.07	9.04	16.02	10.46	0.0112383	2.00276	up	--	--	--	K14432|1.80671e-140|vvi:100243434|K14432 ABA responsive element binding factor | (RefSeq) ABSCISIC ACID-INSENSITIVE 5-like protein 5	ko04075:Plant hormone signal transduction	--	--	bZIP transcription factor;; Basic region leucine zipper;; bZIP Maf transcription factor	ABSCISIC ACID-INSENSITIVE 5-like protein 6 OS=Arabidopsis thaliana (Mouse-ear cress) PE=1 SV=1	K	Transcription	PREDICTED: ABSCISIC ACID-INSENSITIVE 5-like protein 5 isoform X2 [Vitis vinifera]
F01_transcript_122831	9	4	0	43	25	41	0.34	0.15	0	1.67	1.1	1.56	0.0323239	3.132	up	--	--	Cellular Component: endosome (GO:0005768);; Cellular Component: trans-Golgi network (GO:0005802);; Cellular Component: integral component of membrane (GO:0016021);; Molecular Function: transferase activity, transferring glycosyl groups (GO:0016757);; Molecular Function: ligase activity (GO:0016874);;	--	--	--	--	Uncharacterized protein family UPF0016	GDT1-like protein 1, chloroplastic (Precursor) GN=At1g64150 OS=Arabidopsis thaliana (Mouse-ear cress) PE=2 SV=2	S	Function unknown	PREDICTED: uncharacterized protein LOC105130896 [Populus euphratica]
F01_transcript_7117	55	140	164	393	257	413	1.4	3.64	4.66	10.37	7.44	10.65	0.0225072	1.56264	up	[T]	Signal transduction mechanisms	Molecular Function: protein kinase activity (GO:0004672);; Molecular Function: ATP binding (GO:0005524);; Biological Process: protein phosphorylation (GO:0006468);;	--	--	[T]	Signal transduction mechanisms	Protein tyrosine kinase;; Protein kinase domain;; Lipopolysaccharide kinase (Kdo/WaaP) family	Serine/threonine-protein kinase HT1 GN=HT1 OS=Arabidopsis thaliana (Mouse-ear cress) PE=1 SV=1	T	Signal transduction mechanisms	PREDICTED: serine/threonine-protein kinase HT1 [Sesamum indicum]
F01_transcript_106509	0	12	0	37	50	44	0	0.28	0	0.84	1.25	0.99	0.00397911	3.54103	up	--	--	--	--	--	[O]	Posttranslational modification, protein turnover, chaperones	DnaJ domain;; Tetratricopeptide repeat;; Tetratricopeptide repeat	Hsp70-Hsp90 organizing protein 1 GN=HOP1 OS=Arabidopsis thaliana (Mouse-ear cress) PE=2 SV=1	O	Posttranslational modification, protein turnover, chaperones	PREDICTED: uncharacterized protein LOC104613456 [Nelumbo nucifera]
F01_transcript_1691	697	502	852	1250	1935	1903	11.88	8.88	16.46	22.47	37.92	33.4	0.0433083	1.32043	up	[M]	Cell wall/membrane/envelope biogenesis	Biological Process: sucrose metabolic process (GO:0005985);; Molecular Function: sucrose synthase activity (GO:0016157);;	K00695|0|sot:102577594|K00695 sucrose synthase [EC:2.4.1.13] | (RefSeq) SS16, sus4; Sucrose synthase	ko00500:Starch and sucrose metabolism	[M]	Cell wall/membrane/envelope biogenesis	Sucrose synthase;; Glycosyl transferases group 1;; Glycosyl transferases group 1	Sucrose synthase isoform 1 OS=Daucus carota (Wild carrot) PE=2 SV=1	M	Cell wall/membrane/envelope biogenesis	RecName: Full=Sucrose synthase isoform 1; AltName: Full=Sucrose synthase isoform I; AltName: Full=Sucrose-UDP glucosyltransferase 1; AltName: Full=Susy*Dc1 [Daucus carota]
F01_transcript_5747	30	13	0	143	105	95	0.72	0.32	0	3.55	2.87	2.32	0.000290622	3.06906	up	[G]	Carbohydrate transport and metabolism	Molecular Function: nucleotide binding (GO:0000166);; Molecular Function: alpha-amylase activity (GO:0004556);; Molecular Function: calcium ion binding (GO:0005509);; Biological Process: carbohydrate metabolic process (GO:0005975);; Cellular Component: chloroplast stroma (GO:0009570);;	--	--	[G]	Carbohydrate transport and metabolism	Alpha-amylase C-terminal beta-sheet domain;; Alpha amylase, catalytic domain	Alpha-amylase 3, chloroplastic (Precursor) GN=AMY3 OS=Arabidopsis thaliana (Mouse-ear cress) PE=1 SV=1	G	Carbohydrate transport and metabolism	alpha-amylase [Actinidia chinensis]
F01_transcript_8815	76	111	127	0	19	0	2.07	3.14	3.92	0	0.6	0	1.94e-06	-3.977	down	--	--	--	--	--	--	--	UBA-like domain (DUF1421)	--	S	Function unknown	PREDICTED: ataxin-2 homolog [Nicotiana tomentosiformis]
F01_transcript_16348	131	329	338	676	729	624	4.8	12.5	14.01	26.13	31.14	23.63	0.0403403	1.35958	up	[L]	Replication, recombination and repair	Molecular Function: translation initiation factor activity (GO:0003743);; Molecular Function: ATP-dependent RNA helicase activity (GO:0004004);; Molecular Function: ATP binding (GO:0005524);; Biological Process: translational initiation (GO:0006413);; Biological Process: regulation of gene expression (GO:0010468);; Biological Process: RNA secondary structure unwinding (GO:0010501);;	K03257|0|gmx:100806423|K03257 translation initiation factor 4A | (RefSeq) ATP-dependent RNA helicase dbp8-like	ko03013:RNA transport	[J]	Translation, ribosomal structure and biogenesis	DEAD/DEAH box helicase;; Helicase conserved C-terminal domain;; Type III restriction enzyme, res subunit	Eukaryotic initiation factor 4A-8 OS=Nicotiana tabacum (Common tobacco) PE=2 SV=1	L	Replication, recombination and repair	PREDICTED: DEAD-box ATP-dependent RNA helicase 9-like [Glycine max]
F01_transcript_61711	36	29	21	6	0	0	1.04	0.84	0.68	0.19	0	0	0.00992989	-3.81556	down	--	--	Molecular Function: GTPase activity (GO:0003924);; Molecular Function: GTP binding (GO:0005525);;	--	--	[UR]	--	--	Dynamin-related protein 1A GN=At5g42080 OS=Arabidopsis thaliana (Mouse-ear cress) PE=1 SV=3	S	Function unknown	PREDICTED: dynamin-related protein 1E-like [Nicotiana sylvestris]
F01_transcript_9741	6	9	0	244	343	81	0.18	0.28	0	7.21	11.13	2.36	0.0207916	5.57718	up	[I]	Lipid transport and metabolism	Cellular Component: integral component of membrane (GO:0016021);; Molecular Function: hydrolase activity (GO:0016787);;	--	--	--	--	--	--	S	Function unknown	hypothetical protein L484_027688 [Morus notabilis]
F01_transcript_64237	67	28	40	0	10	0	4.68	2.06	3.18	0	0.84	0	0.0102619	-3.67214	down	--	--	Biological Process: response to molecule of fungal origin (GO:0002238);; Cellular Component: endoplasmic reticulum (GO:0005783);; Cellular Component: Golgi apparatus (GO:0005794);; Cellular Component: plasma membrane (GO:0005886);; Cellular Component: integral component of membrane (GO:0016021);; Biological Process: long-chain fatty acid biosynthetic process (GO:0042759);; Molecular Function: sph…	K04710|7.37261e-118|mdm:103436493|K04710 ceramide synthetase [EC:2.3.1.24] | (RefSeq) LAG1 longevity assurance homolog 2	ko00600:Sphingolipid metabolism	[U]	Intracellular trafficking, secretion, and vesicular transport	TLC domain	LAG1 longevity assurance homolog 2 GN=LAG2 OS=Arabidopsis thaliana (Mouse-ear cress) PE=1 SV=1	U	Intracellular trafficking, secretion, and vesicular transport	longevity assurance protein 1-like protein [Gossypium hirsutum]
F01_transcript_117939	39	1	0	122	61	91	0.89	0.04	0	2.9	1.61	2.13	0.0125589	2.83501	up	[M]	Cell wall/membrane/envelope biogenesis	Molecular Function: signal transducer, downstream of receptor, with serine/threonine kinase activity (GO:0004702);; Molecular Function: ATP binding (GO:0005524);; Cellular Component: cytoplasm (GO:0005737);; Cellular Component: plasma membrane (GO:0005886);; Biological Process: signal transduction by protein phosphorylation (GO:0023014);;	K08835|0|pmum:103329853|K08835 serine/threonine-protein kinase OSR1/STK39 [EC:2.7.11.1] | (RefSeq) serine/threonine-protein kinase BLUS1	--	[T]	Signal transduction mechanisms	Protein kinase domain;; Protein tyrosine kinase	Serine/threonine-protein kinase BLUS1 GN=BLUS1 OS=Arabidopsis thaliana (Mouse-ear cress) PE=1 SV=1	T	Signal transduction mechanisms	PREDICTED: serine/threonine-protein kinase BLUS1 [Prunus mume]
F01_transcript_126158	96	129	106	0	6	39	2.27	3.15	2.83	0	0.17	0.95	0.00109421	-2.88795	down	--	--	Molecular Function: DNA binding (GO:0003677);;	--	--	--	--	LIM-domain binding protein;; LIM-domain binding protein	Probable transcriptional regulator SLK2 GN=SLK2 OS=Arabidopsis thaliana (Mouse-ear cress) PE=2 SV=1	S	Function unknown	PREDICTED: probable transcriptional regulator SLK2 isoform X1 [Populus euphratica]
F01_transcript_120950	15	6	15	65	107	70	0.33	0.15	0.38	1.45	2.6	1.53	0.00636676	2.76416	up	[K]	Transcription	--	--	--	[T]	Signal transduction mechanisms	Leucine rich repeat;; Leucine Rich repeats (2 copies);; Leucine-rich repeat;; Leucine Rich repeat;; Leucine Rich Repeat	187-kDa microtubule-associated protein AIR9 GN=AIR9 OS=Arabidopsis thaliana (Mouse-ear cress) PE=2 SV=1	S	Function unknown	PREDICTED: uncharacterized protein LOC100257895 [Vitis vinifera]
F01_transcript_106245	285	34	131	1391	824	1116	3.49	0.43	1.83	17.91	11.53	14.02	3.17e-08	2.90487	up	[P]	Inorganic ion transport and metabolism	Molecular Function: catalase activity (GO:0004096);; Cellular Component: peroxisome (GO:0005777);; Molecular Function: heme binding (GO:0020037);; Biological Process: response to hydrogen peroxide (GO:0042542);; Biological Process: hydrogen peroxide catabolic process (GO:0042744);; Molecular Function: metal ion binding (GO:0046872);; Biological Process: oxidation-reduction process (GO:0055114);; …	K03781|0|vvi:100244516|K03781 catalase [EC:1.11.1.6] | (RefSeq) catalase isozyme 1	ko00380:Tryptophan metabolism;ko00630:Glyoxylate and dicarboxylate metabolism;ko01200:Carbon metabolism;ko04146:Peroxisome	[P]	Inorganic ion transport and metabolism	Catalase;; Catalase-related immune-responsive	Catalase isozyme 2 GN=CAT2 OS=Gossypium hirsutum (Upland cotton) PE=2 SV=1	P	Inorganic ion transport and metabolism	catalase-1 precursor [Panax ginseng]
F01_transcript_30448	59	43	38	0	0	0	12	8.86	8.71	0	0	0	3.17e-08	#NAME?	down	--	--	--	K19765|6.46961e-41|cit:102617392|K19765 heat shock factor-binding protein 1 | (RefSeq) heat shock factor-binding protein 1	--	[KO]	--	Heat shock factor binding protein 1	--	S	Function unknown	hypothetical protein CICLE_v10023083mg [Citrus clementina]
F01_transcript_134117	86	134	70	12	0	0	2.95	4.78	2.73	0.47	0	0.01	1.97e-07	-4.56594	down	[O]	Posttranslational modification, protein turnover, chaperones	Cellular Component: intracellular (GO:0005622);; Biological Process: intracellular signal transduction (GO:0035556);; Molecular Function: metal ion binding (GO:0046872);;	K17609|6.61779e-109|pop:POPTR_0005s26610g|K17609 nucleoredoxin [EC:1.8.1.8] | (RefSeq) POPTRDRAFT_818834; hypothetical protein	--	[R]	General function prediction only	Thioredoxin-like;; AhpC/TSA family;; Thioredoxin-like;; C1 domain	Probable nucleoredoxin 2 OS=Oryza sativa subsp. japonica (Rice) PE=2 SV=1	O	Posttranslational modification, protein turnover, chaperones	hypothetical protein POPTR_0005s26610g [Populus trichocarpa]
F01_transcript_3368	311	300	164	0	0	97	6.4	6.4	3.83	0	0	2.07	0.000290622	-3.00548	down	[J]	Translation, ribosomal structure and biogenesis	Molecular Function: nucleic acid binding (GO:0003676);; Biological Process: nucleobase-containing compound metabolic process (GO:0006139);; Molecular Function: methyltransferase activity (GO:0008168);; Biological Process: methylation (GO:0032259);;	--	--	[KT]	--	MT-A70	Methyltransferase-like protein 2 GN=At1g19340 OS=Arabidopsis thaliana (Mouse-ear cress) PE=2 SV=2	S	Function unknown	hypothetical protein MIMGU_mgv1a018718mg [Erythranthe guttata]
F01_transcript_125405	1093	959	353	36	0	1	8.27	7.55	3.04	0.29	0	0.01	2.48e-06	-5.9813	down	--	--	Cellular Component: membrane (GO:0016020);;	--	--	[E]	Amino acid transport and metabolism	POT family	Protein NRT1/ PTR FAMILY 5.5 GN=NPF5.5 OS=Arabidopsis thaliana (Mouse-ear cress) PE=2 SV=1	E	Amino acid transport and metabolism	PREDICTED: protein NRT1/ PTR FAMILY 5.5-like isoform X2 [Sesamum indicum]
F01_transcript_55467	16	0	32	68	99	109	0.52	0	1.14	2.25	3.59	3.49	0.0115326	2.48844	up	--	--	--	--	--	[A]	RNA processing and modification	SAM domain (Sterile alpha motif);; SAM domain (Sterile alpha motif)	--	S	Function unknown	PREDICTED: uncharacterized protein LOC102600516 [Solanum tuberosum]
F01_transcript_118665	32	14	49	163	207	205	1.28	0.57	2.18	6.72	9.42	8.25	0.000101113	2.58938	up	--	--	Molecular Function: NAD+ ADP-ribosyltransferase activity (GO:0003950);; Cellular Component: integral component of membrane (GO:0016021);; Molecular Function: metal ion binding (GO:0046872);;	--	--	--	--	--	--	S	Function unknown	unnamed protein product [Coffea canephora]
F01_transcript_59690	0	0	21	97	110	62	0	0	0.71	2.95	3.67	1.86	2.49e-05	3.60606	up	[J]	Translation, ribosomal structure and biogenesis	Cellular Component: endoplasmic reticulum (GO:0005783);; Biological Process: ER to Golgi vesicle-mediated transport (GO:0006888);; Biological Process: retrograde vesicle-mediated transport, Golgi to ER (GO:0006890);; Cellular Component: integral component of membrane (GO:0016021);; Cellular Component: SNARE complex (GO:0031201);;	K08492|5.02118e-160|pop:POPTR_0010s20150g|K08492 syntaxin 18 | (RefSeq) POPTRDRAFT_567325; syntaxin 81 family protein	ko04130:SNARE interactions in vesicular transport;ko04145:Phagosome	[U]	Intracellular trafficking, secretion, and vesicular transport	SNARE-complex protein Syntaxin-18 N-terminus;; Ribosomal protein L35Ae	Syntaxin-81 GN=SYP81 OS=Arabidopsis thaliana (Mouse-ear cress) PE=1 SV=2	U	Intracellular trafficking, secretion, and vesicular transport	PREDICTED: syntaxin-81 [Sesamum indicum]
F01_transcript_98198	432	414	378	56	14	37	15.13	14.98	14.97	2.07	0.59	1.35	3.62e-12	-3.50429	down	--	--	Molecular Function: transcription factor activity, sequence-specific DNA binding (GO:0003700);; Cellular Component: nucleus (GO:0005634);; Biological Process: regulation of transcription, DNA-templated (GO:0006355);; Molecular Function: sequence-specific DNA binding (GO:0043565);;	K09060|6.91056e-105|vvi:100248302|K09060 plant G-box-binding factor | (RefSeq) common plant regulatory factor 1	--	--	--	G-box binding protein MFMR;; Disordered region downstream of MFMR	Common plant regulatory factor 1 GN=CPRF1 OS=Petroselinum crispum (Parsley) PE=2 SV=1	K	Transcription	RecName: Full=Common plant regulatory factor 1; Short=CPRF-1 [Petroselinum crispum]
F01_transcript_35060	154	127	149	494	585	378	5.4	4.6	5.9	18.24	23.84	13.65	0.00120968	1.7876	up	[P]	Inorganic ion transport and metabolism	Molecular Function: molybdate ion transmembrane transporter activity (GO:0015098);; Biological Process: molybdate ion transport (GO:0015689);; Cellular Component: integral component of membrane (GO:0016021);;	--	--	--	--	Molybdate transporter of MFS superfamily	Molybdate transporter 2 GN=F5I6.6 OS=Arabidopsis thaliana (Mouse-ear cress) PE=1 SV=2	P	Inorganic ion transport and metabolism	PREDICTED: molybdate transporter 2 [Nicotiana sylvestris]
F01_transcript_120758	20	24	21	0	0	3	1.78	2.17	2.06	0	0	0.3	0.00939309	-4.46216	down	--	--	Molecular Function: protein kinase activity (GO:0004672);; Molecular Function: ATP binding (GO:0005524);; Biological Process: protein phosphorylation (GO:0006468);; Cellular Component: integral component of membrane (GO:0016021);;	K14500|1.03013e-24|gmx:100781583|K14500 BR-signaling kinase [EC:2.7.11.1] | (RefSeq) probable serine/threonine-protein kinase At4g35230	ko04075:Plant hormone signal transduction	--	--	--	Probable serine/threonine-protein kinase At4g35230 GN=At4g35230 OS=Arabidopsis thaliana (Mouse-ear cress) PE=1 SV=1	T	Signal transduction mechanisms	PREDICTED: probable serine/threonine-protein kinase At4g35230-like isoform 1 [Glycine max]
F01_transcript_53694	59	43	38	227	197	131	1.52	1.17	1.13	6.19	5.89	3.48	0.0113813	2.02342	up	--	--	Biological Process: lipid metabolic process (GO:0006629);; Molecular Function: O-acyltransferase activity (GO:0008374);; Cellular Component: integral component of membrane (GO:0016021);; Molecular Function: phospholipid:diacylglycerol acyltransferase activity (GO:0046027);;	K00679|0|vvi:100259274|K00679 phospholipid:diacylglycerol acyltransferase [EC:2.3.1.158] | (RefSeq) phospholipid:diacylglycerol acyltransferase 1-like	ko00561:Glycerolipid metabolism	[I]	Lipid transport and metabolism	Lecithin:cholesterol acyltransferase	Phospholipid:diacylglycerol acyltransferase 1 OS=Arabidopsis thaliana (Mouse-ear cress) PE=2 SV=1	S	Function unknown	PREDICTED: phospholipid:diacylglycerol acyltransferase 1-like [Nelumbo nucifera]
F01_transcript_67083	0	80	212	760	617	727	0	2.2	6.37	21.25	18.92	19.87	7.39e-11	2.80865	up	[H]	Coenzyme transport and metabolism	Cellular Component: endosome (GO:0005768);; Cellular Component: vacuolar membrane (GO:0005774);; Cellular Component: trans-Golgi network (GO:0005802);; Molecular Function: S-adenosylmethionine-dependent methyltransferase activity (GO:0008757);; Cellular Component: plant-type cell wall (GO:0009505);; Cellular Component: integral component of membrane (GO:0016021);; Biological Process: methylation …	--	--	--	--	Putative S-adenosyl-L-methionine-dependent methyltransferase;; Methyltransferase domain;; Methyltransferase domain	Probable methyltransferase PMT14 GN=At4g18030 OS=Arabidopsis thaliana (Mouse-ear cress) PE=2 SV=1	S	Function unknown	hypothetical protein POPTR_0003s08590g [Populus trichocarpa]
F01_transcript_116550	0	0	0	25	44	86	0	0	0	0.76	1.42	2.47	0.00083107	Inf	up	[G]	Carbohydrate transport and metabolism	Molecular Function: glucose-6-phosphate dehydrogenase activity (GO:0004345);; Cellular Component: cytosol (GO:0005829);; Biological Process: glucose metabolic process (GO:0006006);; Biological Process: pentose-phosphate shunt, oxidative branch (GO:0009051);; Molecular Function: NADP binding (GO:0050661);; Biological Process: oxidation-reduction process (GO:0055114);;	K00036|0|vvi:100254253|K00036 glucose-6-phosphate 1-dehydrogenase [EC:1.1.1.49 1.1.1.363] | (RefSeq) glucose-6-phosphate 1-dehydrogenase, cytoplasmic isoform	ko00030:Pentose phosphate pathway;ko00480:Glutathione metabolism;ko01200:Carbon metabolism	[G]	Carbohydrate transport and metabolism	Glucose-6-phosphate dehydrogenase, C-terminal domain;; Glucose-6-phosphate dehydrogenase, NAD binding domain	Glucose-6-phosphate 1-dehydrogenase, cytoplasmic isoform 2 GN=ACG12 OS=Arabidopsis thaliana (Mouse-ear cress) PE=2 SV=1	G	Carbohydrate transport and metabolism	cytosolic glucose-6-phosphate dehydrogenase 1 [Petroselinum crispum]
F01_transcript_121509	8	2	12	68	40	88	0.64	0.21	1	5.36	3.54	6.78	0.00224218	3.12709	up	[P]	Inorganic ion transport and metabolism	Cellular Component: cytosol (GO:0005829);; Molecular Function: cyanate hydratase activity (GO:0008824);; Biological Process: cyanate catabolic process (GO:0009440);; Molecular Function: identical protein binding (GO:0042802);; Molecular Function: sequence-specific DNA binding (GO:0043565);;	K01725|2.68494e-86|cit:102613904|K01725 cyanate lyase [EC:4.2.1.104] | (RefSeq) cyanate hydratase-like	ko00910:Nitrogen metabolism	--	--	Cyanate lyase C-terminal domain	Cyanate hydratase 2 {ECO:0000255|HAMAP-Rule:MF_03139} GN=POPTRDRAFT_833411 OS=Populus trichocarpa (Western balsam poplar) PE=3 SV=1	P	Inorganic ion transport and metabolism	PREDICTED: cyanate hydratase 2 [Eucalyptus grandis]
F01_transcript_97044	6035	3644	3331	1529	569	1510	116.63	73.1	73	31.21	12.69	30.1	0.0475794	-1.83295	down	[M]	Cell wall/membrane/envelope biogenesis	Biological Process: sucrose metabolic process (GO:0005985);; Molecular Function: sucrose synthase activity (GO:0016157);;	K00695|0|sot:102577594|K00695 sucrose synthase [EC:2.4.1.13] | (RefSeq) SS16, sus4; Sucrose synthase	ko00500:Starch and sucrose metabolism	[M]	Cell wall/membrane/envelope biogenesis	Sucrose synthase;; Glycosyl transferases group 1;; Glycosyl transferases group 1	Sucrose synthase isoform 1 OS=Daucus carota (Wild carrot) PE=2 SV=1	M	Cell wall/membrane/envelope biogenesis	RecName: Full=Sucrose synthase isoform 1; AltName: Full=Sucrose synthase isoform I; AltName: Full=Sucrose-UDP glucosyltransferase 1; AltName: Full=Susy*Dc1 [Daucus carota]
F01_transcript_122718	10	0	15	39	65	76	0.86	0	1.45	3.52	6.73	6.77	0.0113813	2.82173	up	--	--	Cellular Component: integral component of membrane (GO:0016021);;	--	--	--	--	Protein of unknown function (DUF677)	UPF0496 protein At4g34320 GN=At4g34320 OS=Arabidopsis thaliana (Mouse-ear cress) PE=2 SV=1	S	Function unknown	hypothetical protein POPTR_0004s15800g [Populus trichocarpa]
F01_transcript_35073	334	627	212	17	12	23	7.8	15.15	5.6	0.43	0.33	0.57	0.00392181	-4.45663	down	[T]	Signal transduction mechanisms	Molecular Function: G-protein coupled receptor kinase activity (GO:0004703);; Molecular Function: ATP binding (GO:0005524);; Biological Process: protein phosphorylation (GO:0006468);; Cellular Component: integral component of membrane (GO:0016021);;	--	--	--	--	Protein tyrosine kinase;; Protein kinase domain;; Leucine rich repeat;; Leucine Rich repeats (2 copies);; Leucine rich repeat N-terminal domain;; Leucine Rich Repeat	Protein STRUBBELIG-RECEPTOR FAMILY 6 (Precursor) GN=SRF6 OS=Arabidopsis thaliana (Mouse-ear cress) PE=1 SV=1	S	Function unknown	unnamed protein product [Vitis vinifera]
F01_transcript_37249	1442	480	1002	0	221	0	162.1	55.22	126.55	0	30.73	0	0.0311557	-3.65107	down	--	--	Cellular Component: integral component of membrane (GO:0016021);;	--	--	--	--	Chlorophyll A-B binding protein	Early light-induced protein 1, chloroplastic (Precursor) GN=ELIP1 OS=Arabidopsis thaliana (Mouse-ear cress) PE=1 SV=1	S	Function unknown	PREDICTED: early light-induced protein 1, chloroplastic-like isoform X1 [Eucalyptus grandis]
F01_transcript_136874	161	30	143	0	0	0	3.51	0.69	3.55	0	0	0	0.000828986	#NAME?	down	[R]	General function prediction only	--	--	--	[T]	Signal transduction mechanisms	Tetratricopeptide repeat;; Tetratricopeptide repeat;; Anaphase-promoting complex, cyclosome, subunit 3;; Tetratricopeptide repeat;; Tetratricopeptide repeat;; Tetratricopeptide repeat;; Tetratricopeptide repeat;; TPR repeat;; Tetratricopeptide repeat	--	S	Function unknown	unnamed protein product [Coffea canephora]
F01_transcript_29500	41	105	0	173	204	204	6.65	17.22	0	29.36	42.2	34.73	0.00939309	2.07584	up	--	--	Molecular Function: structural constituent of ribosome (GO:0003735);; Biological Process: translation (GO:0006412);; Cellular Component: cytosolic large ribosomal subunit (GO:0022625);;	K02901|1.16712e-74|sot:102597208|K02901 large subunit ribosomal protein L27e | (RefSeq) RPL27; 60S ribosomal protein L27	ko03010:Ribosome	[J]	Translation, ribosomal structure and biogenesis	Ribosomal L27e protein family	60S ribosomal protein L27-3 GN=RPL27C OS=Arabidopsis thaliana (Mouse-ear cress) PE=2 SV=2	J	Translation, ribosomal structure and biogenesis	ribosomal protein L27 [Panax ginseng]
F01_transcript_80649	795	506	868	4033	2326	2467	49.82	32.71	61.43	266.49	173.46	160.36	0.00817469	2.03199	up	--	--	Molecular Function: endonuclease activity (GO:0004519);; Cellular Component: cytoplasm (GO:0005737);; Biological Process: defense response to Gram-negative bacterium (GO:0050829);; Biological Process: defense response to fungus (GO:0050832);; Biological Process: nucleic acid phosphodiester bond hydrolysis (GO:0090305);;	--	--	--	--	Pathogenesis-related protein Bet v I family;; Pathogenesis-related protein Bet v I family	Ribonuclease 1 OS=Panax ginseng (Korean ginseng) PE=1 SV=1	S	Function unknown	PR10-1, partial [Panax ginseng]
F01_transcript_79602	14	11	38	115	208	122	0.25	0.2	0.72	2.03	4	2.1	0.0119267	2.81044	up	--	--	Molecular Function: aspartic-type endopeptidase activity (GO:0004190);; Biological Process: proteolysis (GO:0006508);; Biological Process: lipid metabolic process (GO:0006629);; Cellular Component: integral component of membrane (GO:0016021);;	K08245|1.55825e-48|sot:102604732|K08245 phytepsin [EC:3.4.23.40] | (RefSeq) aspartic proteinase-like	--	[O]	Posttranslational modification, protein turnover, chaperones	Protein kinase domain;; Saposin-like type B, region 1	Aspartic proteinase A1 (Precursor) GN=F12F1.24 OS=Arabidopsis thaliana (Mouse-ear cress) PE=1 SV=1	O	Posttranslational modification, protein turnover, chaperones	PREDICTED: aspartic proteinase A1 [Tarenaya hassleriana]
F01_transcript_131886	0	20	29	261	319	123	0	0.61	0.95	7.81	10.48	3.61	0.0049526	3.84235	up	[I]	Lipid transport and metabolism	Cellular Component: integral component of membrane (GO:0016021);; Molecular Function: hydrolase activity (GO:0016787);;	--	--	--	--	--	--	S	Function unknown	hypothetical protein L484_027688 [Morus notabilis]
F01_transcript_47836	1235	1306	872	6	0	433	21.89	24.04	17.53	0.12	0	7.93	3.17e-08	-2.97237	down	[C]	Energy production and conversion	Molecular Function: aconitate hydratase activity (GO:0003994);; Biological Process: metabolic process (GO:0008152);; Molecular Function: 4 iron, 4 sulfur cluster binding (GO:0051539);;	K01681|0|cmo:103495599|K01681 aconitate hydratase [EC:4.2.1.3] | (RefSeq) aconitate hydratase, cytoplasmic	ko00020:Citrate cycle (TCA cycle);ko00630:Glyoxylate and dicarboxylate metabolism;ko01200:Carbon metabolism;ko01210:2-Oxocarboxylic acid metabolism;ko01230:Biosynthesis of amino acids	[AJ]	--	Aconitase family (aconitate hydratase);; Aconitase C-terminal domain	Aconitate hydratase, cytoplasmic OS=Cucurbita maxima (Pumpkin) PE=2 SV=1	C	Energy production and conversion	PREDICTED: aconitate hydratase, cytoplasmic [Nicotiana tomentosiformis]
F01_transcript_112343	0	0	0	74	60	28	0	0	0	4.59	4.19	1.69	2.36e-06	Inf	up	[M]	Cell wall/membrane/envelope biogenesis	Cellular Component: cytosol (GO:0005829);; Molecular Function: cinnamoyl-CoA reductase activity (GO:0016621);; Molecular Function: dihydrokaempferol 4-reductase activity (GO:0045552);; Molecular Function: coenzyme binding (GO:0050662);; Biological Process: oxidation-reduction process (GO:0055114);;	--	--	[V]	Defense mechanisms	NAD dependent epimerase/dehydratase family;; 3-beta hydroxysteroid dehydrogenase/isomerase family;; GDP-mannose 4,6 dehydratase;; NAD(P)H-binding;; Male sterility protein;; Polysaccharide biosynthesis protein;; NmrA-like family;; KR domain	Cinnamoyl-CoA reductase 1 GN=T24D18.5 OS=Arabidopsis thaliana (Mouse-ear cress) PE=1 SV=1	M	Cell wall/membrane/envelope biogenesis	cinnamoyl-CoA reductase [Camellia oleifera]
F01_transcript_2299	6	23	41	170	302	184	0.12	0.46	0.89	3.38	6.57	3.58	0.000828986	3.22354	up	--	--	Molecular Function: isomerase activity (GO:0016853);;	--	--	[T]	Signal transduction mechanisms	MA3 domain	Eukaryotic translation initiation factor isoform 4G-1 GN=EIF(ISO)4G1 OS=Arabidopsis thaliana (Mouse-ear cress) PE=1 SV=1	S	Function unknown	PREDICTED: programmed cell death protein 4 [Vitis vinifera]
F01_transcript_122787	5	104	51	302	290	328	0.11	2.32	1.25	6.86	7.2	7.27	4.15e-06	2.55312	up	--	--	Molecular Function: nucleic acid binding (GO:0003676);; Biological Process: nucleobase-containing compound metabolic process (GO:0006139);; Molecular Function: methyltransferase activity (GO:0008168);; Biological Process: methylation (GO:0032259);;	--	--	[KT]	--	MT-A70	Methyltransferase-like protein 2 GN=At1g19340 OS=Arabidopsis thaliana (Mouse-ear cress) PE=2 SV=2	S	Function unknown	unnamed protein product [Vitis vinifera]
F01_transcript_2341	140	49	47	258	379	294	2.66	0.98	1.02	5.16	8.27	5.75	0.000999136	2.02567	up	--	--	Molecular Function: DNA binding (GO:0003677);; Molecular Function: zinc ion binding (GO:0008270);;	--	--	--	--	ARID/BRIGHT DNA binding domain	AT-rich interactive domain-containing protein 4 GN=ARID4 OS=Arabidopsis thaliana (Mouse-ear cress) PE=2 SV=1	S	Function unknown	unnamed protein product [Coffea canephora]
F01_transcript_17524	1721	754	685	3051	3488	2963	65.97	29.92	29.74	123.4	156.23	117.42	0.00264226	1.62938	up	[O]	Posttranslational modification, protein turnover, chaperones	Molecular Function: translation elongation factor activity (GO:0003746);; Molecular Function: glutathione transferase activity (GO:0004364);; Cellular Component: nucleus (GO:0005634);; Cellular Component: cytoplasm (GO:0005737);; Biological Process: translational elongation (GO:0006414);; Biological Process: glutathione metabolic process (GO:0006749);;	K03233|0|vvi:100264325|K03233 elongation factor 1-gamma | (RefSeq) elongation factor 1-gamma	--	[O]	Posttranslational modification, protein turnover, chaperones	Elongation factor 1 gamma, conserved domain;; Glutathione S-transferase, N-terminal domain;; Glutathione S-transferase, N-terminal domain;; Glutathione S-transferase, C-terminal domain;; Glutathione S-transferase, N-terminal domain;; Glutathione S-transferase, C-terminal domain	Elongation factor 1-gamma OS=Prunus avium (Cherry) PE=2 SV=1	O	Posttranslational modification, protein turnover, chaperones	PREDICTED: elongation factor 1-gamma-like [Vitis vinifera]
F01_transcript_24690	291	65	364	679	830	673	21.41	4.94	30.19	52.69	73.28	51.44	0.00768634	1.5949	up	--	--	--	--	--	--	--	--	--	S	Function unknown	PREDICTED: uncharacterized protein LOC105176019 [Sesamum indicum]
F01_transcript_145661	56	41	21	1	0	0	1.33	1.02	0.56	0.03	0	0	9.08e-06	-6.84651	down	[J]	Translation, ribosomal structure and biogenesis	Molecular Function: structural constituent of ribosome (GO:0003735);; Cellular Component: ribosome (GO:0005840);; Biological Process: translation (GO:0006412);; Molecular Function: 5S rRNA binding (GO:0008097);; Cellular Component: integral component of membrane (GO:0016021);;	K02932|1.09539e-96|mdm:103402379|K02932 large subunit ribosomal protein L5e | (RefSeq) 60S ribosomal protein L5	ko03010:Ribosome	[J]	Translation, ribosomal structure and biogenesis	Ribosomal large subunit proteins 60S L5, and 50S L18	60S ribosomal protein L5 GN=RPL5 OS=Cucumis sativus (Cucumber) PE=2 SV=1	J	Translation, ribosomal structure and biogenesis	PREDICTED: 60S ribosomal protein L5 [Malus domestica]
F01_transcript_141753	70	128	29	246	315	307	2.28	4.32	1.06	8.41	11.87	10.28	0.00198155	1.99537	up	[DPM]	--	Molecular Function: copper ion binding (GO:0005507);; Molecular Function: oxidoreductase activity, oxidizing metal ions (GO:0016722);; Molecular Function: bilirubin oxidase activity (GO:0047705);; Biological Process: oxidation-reduction process (GO:0055114);;	--	--	--	--	Multicopper oxidase;; Multicopper oxidase;; Multicopper oxidase	Multicopper oxidase LPR1 (Precursor) GN=LPR1 OS=Arabidopsis thaliana (Mouse-ear cress) PE=2 SV=1	Q	Secondary metabolites biosynthesis, transport and catabolism	PREDICTED: multicopper oxidase LPR1-like [Nicotiana sylvestris]
F01_transcript_63631	7	8	3	49	53	61	0.35	0.39	0.16	2.38	2.86	2.88	0.00436812	3.227	up	[QV]	--	Biological Process: metabolic process (GO:0008152);; Cellular Component: membrane (GO:0016020);; Molecular Function: oxidoreductase activity (GO:0016491);; Molecular Function: metal ion binding (GO:0046872);; Molecular Function: organic cyclic compound binding (GO:0097159);; Molecular Function: heterocyclic compound binding (GO:1901363);;	--	--	[Q]	Secondary metabolites biosynthesis, transport and catabolism	Cytochrome P450	Cytochrome P450 71A21 GN=CYP71A21 OS=Arabidopsis thaliana (Mouse-ear cress) PE=2 SV=1	Q	Secondary metabolites biosynthesis, transport and catabolism	PREDICTED: cytochrome P450 71A25-like [Fragaria vesca subsp. vesca]
