# Supplementary material for: A bZIP transcription factor, PqbZIP1, is involved in the plant defense response of American ginseng
Source: PeerJ. 2022 Mar 8;10:e12939. doi: 10.7717/peerj.12939 (PMC8916028; doi:10.7717/peerj.12939)
Supplement: Supplemental Information 14 [file peerj-10-12939-s014.xlsx]

## Sheet: Sheet1
Table S10. Some of the immune response related genes induced by chitin
#ID	FDR	log2FC	regulated	GO_annotation	Pfam_annotation
F01_transcript_129280	0.0112383	2.00276	up	--	bZIP transcription factor;; Basic region leucine zipper;; bZIP Maf transcription factor
F01_transcript_64237	0.0102619	-3.67214	down	Biological Process: response to molecule of fungal origin (GO:0002238);; Cellular Component: endoplasmic reticulum (GO:0005783);; Cellular Component: Golgi apparatus (GO:0005794);; Cellular Component: plasma membrane (GO:0005886);; Cellular Component: integral component of membrane (GO:0016021);; Biological Process: long-chain fatty acid biosynthetic process (GO:0042759);; Molecular Function: sph…	TLC domain
F01_transcript_106245	3.17e-08	2.90487	up	Molecular Function: catalase activity (GO:0004096);; Cellular Component: peroxisome (GO:0005777);; Molecular Function: heme binding (GO:0020037);; Biological Process: response to hydrogen peroxide (GO:0042542);; Biological Process: hydrogen peroxide catabolic process (GO:0042744);; Molecular Function: metal ion binding (GO:0046872);; Biological Process: oxidation-reduction process (GO:0055114);; …	Catalase;; Catalase-related immune-responsive
F01_transcript_80649	0.00817469	2.03199	up	Molecular Function: endonuclease activity (GO:0004519);; Cellular Component: cytoplasm (GO:0005737);; Biological Process: defense response to Gram-negative bacterium (GO:0050829);; Biological Process: defense response to fungus (GO:0050832);; Biological Process: nucleic acid phosphodiester bond hydrolysis (GO:0090305);;	Pathogenesis-related protein Bet v I family;; Pathogenesis-related protein Bet v I family
F01_transcript_63631	0.00436812	3.227	up	Biological Process: metabolic process (GO:0008152);; Cellular Component: membrane (GO:0016020);; Molecular Function: oxidoreductase activity (GO:0016491);; Molecular Function: metal ion binding (GO:0046872);; Molecular Function: organic cyclic compound binding (GO:0097159);; Molecular Function: heterocyclic compound binding (GO:1901363);;	Cytochrome P450
