# Supplementary material for: A bZIP transcription factor, PqbZIP1, is involved in the plant defense response of American ginseng
Source: PeerJ. 2022 Mar 8;10:e12939. doi: 10.7717/peerj.12939 (PMC8916028; doi:10.7717/peerj.12939)
Supplement: Supplemental Information 15 [file peerj-10-12939-s015.xlsx]

## Sheet: Sheet1
Table S11. Transcription factors in American ginseng
#ID	Family	Type
F01_transcript_100506	AGC_MAST	PK
F01_transcript_129212	AGC_MAST	PK
F01_transcript_153	AGC_MAST	PK
F01_transcript_188	AGC_MAST	PK
F01_transcript_68970	AGC_MAST	PK
F01_transcript_104096	AGC_NDR	PK
F01_transcript_10811	AGC_NDR	PK
F01_transcript_125050	AGC_NDR	PK
F01_transcript_130560	AGC_NDR	PK
F01_transcript_137784	AGC_NDR	PK
F01_transcript_33562	AGC_NDR	PK
F01_transcript_34214	AGC_NDR	PK
F01_transcript_53179	AGC_NDR	PK
F01_transcript_57802	AGC_NDR	PK
F01_transcript_60268	AGC_NDR	PK
F01_transcript_60421	AGC_NDR	PK
F01_transcript_6451	AGC_NDR	PK
F01_transcript_66369	AGC_NDR	PK
F01_transcript_7445	AGC_NDR	PK
F01_transcript_7586	AGC_NDR	PK
F01_transcript_8023	AGC_NDR	PK
F01_transcript_8026	AGC_NDR	PK
F01_transcript_8209	AGC_NDR	PK
F01_transcript_8321	AGC_NDR	PK
F01_transcript_8337	AGC_NDR	PK
F01_transcript_86436	AGC_NDR	PK
F01_transcript_91475	AGC_NDR	PK
F01_transcript_94397	AGC_NDR	PK
F01_transcript_9847	AGC_NDR	PK
F01_transcript_34982	AGC_PDK1	PK
F01_transcript_52374	AGC_PDK1	PK
F01_transcript_63373	AGC_PDK1	PK
F01_transcript_125967	AGC_PKA-PKG	PK
F01_transcript_129979	AGC_PKA-PKG	PK
F01_transcript_137534	AGC_PKA-PKG	PK
F01_transcript_141553	AGC_PKA-PKG	PK
F01_transcript_141611	AGC_PKA-PKG	PK
F01_transcript_265	AGC_PKA-PKG	PK
F01_transcript_51481	AGC_PKA-PKG	PK
F01_transcript_105376	AGC_RSK-2	PK
F01_transcript_106300	AGC_RSK-2	PK
F01_transcript_109911	AGC_RSK-2	PK
F01_transcript_116923	AGC_RSK-2	PK
F01_transcript_119251	AGC_RSK-2	PK
F01_transcript_120204	AGC_RSK-2	PK
F01_transcript_124133	AGC_RSK-2	PK
F01_transcript_129793	AGC_RSK-2	PK
F01_transcript_129834	AGC_RSK-2	PK
F01_transcript_131858	AGC_RSK-2	PK
F01_transcript_13447	AGC_RSK-2	PK
F01_transcript_139527	AGC_RSK-2	PK
F01_transcript_139547	AGC_RSK-2	PK
F01_transcript_143538	AGC_RSK-2	PK
F01_transcript_145704	AGC_RSK-2	PK
F01_transcript_1594	AGC_RSK-2	PK
F01_transcript_1630	AGC_RSK-2	PK
F01_transcript_1698	AGC_RSK-2	PK
F01_transcript_1792	AGC_RSK-2	PK
F01_transcript_20631	AGC_RSK-2	PK
F01_transcript_39674	AGC_RSK-2	PK
F01_transcript_41030	AGC_RSK-2	PK
F01_transcript_45434	AGC_RSK-2	PK
F01_transcript_46213	AGC_RSK-2	PK
F01_transcript_50965	AGC_RSK-2	PK
F01_transcript_55755	AGC_RSK-2	PK
F01_transcript_5739	AGC_RSK-2	PK
F01_transcript_58816	AGC_RSK-2	PK
F01_transcript_59009	AGC_RSK-2	PK
F01_transcript_61031	AGC_RSK-2	PK
F01_transcript_62685	AGC_RSK-2	PK
F01_transcript_6402	AGC_RSK-2	PK
F01_transcript_653	AGC_RSK-2	PK
F01_transcript_67883	AGC_RSK-2	PK
F01_transcript_67912	AGC_RSK-2	PK
F01_transcript_68200	AGC_RSK-2	PK
F01_transcript_69141	AGC_RSK-2	PK
F01_transcript_73732	AGC_RSK-2	PK
F01_transcript_7377	AGC_RSK-2	PK
F01_transcript_75460	AGC_RSK-2	PK
F01_transcript_75988	AGC_RSK-2	PK
F01_transcript_78241	AGC_RSK-2	PK
F01_transcript_78585	AGC_RSK-2	PK
F01_transcript_8020	AGC_RSK-2	PK
F01_transcript_80652	AGC_RSK-2	PK
F01_transcript_82266	AGC_RSK-2	PK
F01_transcript_86351	AGC_RSK-2	PK
F01_transcript_89263	AGC_RSK-2	PK
F01_transcript_89666	AGC_RSK-2	PK
F01_transcript_91989	AGC_RSK-2	PK
F01_transcript_98868	AGC_RSK-2	PK
F01_transcript_108052	AGC-Pl	PK
F01_transcript_108787	AGC-Pl	PK
F01_transcript_11496	AGC-Pl	PK
F01_transcript_12581	AGC-Pl	PK
F01_transcript_127420	AGC-Pl	PK
F01_transcript_135397	AGC-Pl	PK
F01_transcript_136502	AGC-Pl	PK
F01_transcript_136737	AGC-Pl	PK
F01_transcript_137991	AGC-Pl	PK
F01_transcript_140403	AGC-Pl	PK
F01_transcript_14999	AGC-Pl	PK
F01_transcript_21194	AGC-Pl	PK
F01_transcript_37363	AGC-Pl	PK
F01_transcript_37614	AGC-Pl	PK
F01_transcript_41559	AGC-Pl	PK
F01_transcript_44309	AGC-Pl	PK
F01_transcript_46755	AGC-Pl	PK
F01_transcript_57607	AGC-Pl	PK
F01_transcript_62052	AGC-Pl	PK
F01_transcript_66052	AGC-Pl	PK
F01_transcript_75058	AGC-Pl	PK
F01_transcript_76299	AGC-Pl	PK
F01_transcript_81333	AGC-Pl	PK
F01_transcript_87863	AGC-Pl	PK
F01_transcript_130464	Alfin-like	TF
F01_transcript_130750	Alfin-like	TF
F01_transcript_139535	Alfin-like	TF
F01_transcript_142994	Alfin-like	TF
F01_transcript_21541	Alfin-like	TF
F01_transcript_21654	Alfin-like	TF
F01_transcript_22117	Alfin-like	TF
F01_transcript_22372	Alfin-like	TF
F01_transcript_22410	Alfin-like	TF
F01_transcript_22855	Alfin-like	TF
F01_transcript_44993	Alfin-like	TF
F01_transcript_48745	Alfin-like	TF
F01_transcript_58809	Alfin-like	TF
F01_transcript_68157	Alfin-like	TF
F01_transcript_70144	Alfin-like	TF
F01_transcript_72516	Alfin-like	TF
F01_transcript_75573	Alfin-like	TF
F01_transcript_84290	Alfin-like	TF
F01_transcript_110441	AP2/ERF-AP2	TF
F01_transcript_113150	AP2/ERF-AP2	TF
F01_transcript_11355	AP2/ERF-AP2	TF
F01_transcript_115168	AP2/ERF-AP2	TF
F01_transcript_115373	AP2/ERF-AP2	TF
F01_transcript_117946	AP2/ERF-AP2	TF
F01_transcript_122131	AP2/ERF-AP2	TF
F01_transcript_122468	AP2/ERF-AP2	TF
F01_transcript_123304	AP2/ERF-AP2	TF
F01_transcript_124358	AP2/ERF-AP2	TF
F01_transcript_13017	AP2/ERF-AP2	TF
F01_transcript_134702	AP2/ERF-AP2	TF
F01_transcript_142899	AP2/ERF-AP2	TF
F01_transcript_143676	AP2/ERF-AP2	TF
F01_transcript_20966	AP2/ERF-AP2	TF
F01_transcript_37289	AP2/ERF-AP2	TF
F01_transcript_40651	AP2/ERF-AP2	TF
F01_transcript_44515	AP2/ERF-AP2	TF
F01_transcript_53058	AP2/ERF-AP2	TF
F01_transcript_54704	AP2/ERF-AP2	TF
F01_transcript_62851	AP2/ERF-AP2	TF
F01_transcript_6360	AP2/ERF-AP2	TF
F01_transcript_70674	AP2/ERF-AP2	TF
F01_transcript_7505	AP2/ERF-AP2	TF
F01_transcript_76430	AP2/ERF-AP2	TF
F01_transcript_77153	AP2/ERF-AP2	TF
F01_transcript_77964	AP2/ERF-AP2	TF
F01_transcript_89752	AP2/ERF-AP2	TF
F01_transcript_9662	AP2/ERF-AP2	TF
F01_transcript_99725	AP2/ERF-AP2	TF
F01_transcript_100228	AP2/ERF-ERF	TF
F01_transcript_100419	AP2/ERF-ERF	TF
F01_transcript_100732	AP2/ERF-ERF	TF
F01_transcript_101282	AP2/ERF-ERF	TF
F01_transcript_102616	AP2/ERF-ERF	TF
F01_transcript_103079	AP2/ERF-ERF	TF
F01_transcript_104667	AP2/ERF-ERF	TF
F01_transcript_105055	AP2/ERF-ERF	TF
F01_transcript_10835	AP2/ERF-ERF	TF
F01_transcript_10948	AP2/ERF-ERF	TF
F01_transcript_109803	AP2/ERF-ERF	TF
F01_transcript_111135	AP2/ERF-ERF	TF
F01_transcript_11125	AP2/ERF-ERF	TF
F01_transcript_111624	AP2/ERF-ERF	TF
F01_transcript_112253	AP2/ERF-ERF	TF
F01_transcript_112833	AP2/ERF-ERF	TF
F01_transcript_112935	AP2/ERF-ERF	TF
F01_transcript_113636	AP2/ERF-ERF	TF
F01_transcript_114548	AP2/ERF-ERF	TF
F01_transcript_116176	AP2/ERF-ERF	TF
F01_transcript_117527	AP2/ERF-ERF	TF
F01_transcript_117985	AP2/ERF-ERF	TF
F01_transcript_11849	AP2/ERF-ERF	TF
F01_transcript_118585	AP2/ERF-ERF	TF
F01_transcript_11918	AP2/ERF-ERF	TF
F01_transcript_119924	AP2/ERF-ERF	TF
F01_transcript_120987	AP2/ERF-ERF	TF
F01_transcript_122171	AP2/ERF-ERF	TF
F01_transcript_122747	AP2/ERF-ERF	TF
F01_transcript_124045	AP2/ERF-ERF	TF
F01_transcript_125287	AP2/ERF-ERF	TF
F01_transcript_125523	AP2/ERF-ERF	TF
F01_transcript_12586	AP2/ERF-ERF	TF
F01_transcript_126969	AP2/ERF-ERF	TF
F01_transcript_127646	AP2/ERF-ERF	TF
F01_transcript_128323	AP2/ERF-ERF	TF
F01_transcript_128629	AP2/ERF-ERF	TF
F01_transcript_12886	AP2/ERF-ERF	TF
F01_transcript_133589	AP2/ERF-ERF	TF
F01_transcript_13385	AP2/ERF-ERF	TF
F01_transcript_134326	AP2/ERF-ERF	TF
F01_transcript_135170	AP2/ERF-ERF	TF
F01_transcript_136904	AP2/ERF-ERF	TF
F01_transcript_137198	AP2/ERF-ERF	TF
F01_transcript_140672	AP2/ERF-ERF	TF
F01_transcript_143190	AP2/ERF-ERF	TF
F01_transcript_143294	AP2/ERF-ERF	TF
F01_transcript_145263	AP2/ERF-ERF	TF
F01_transcript_15598	AP2/ERF-ERF	TF
F01_transcript_16120	AP2/ERF-ERF	TF
F01_transcript_16944	AP2/ERF-ERF	TF
F01_transcript_16982	AP2/ERF-ERF	TF
F01_transcript_17057	AP2/ERF-ERF	TF
F01_transcript_17472	AP2/ERF-ERF	TF
F01_transcript_17696	AP2/ERF-ERF	TF
F01_transcript_18540	AP2/ERF-ERF	TF
F01_transcript_19216	AP2/ERF-ERF	TF
F01_transcript_20209	AP2/ERF-ERF	TF
F01_transcript_21168	AP2/ERF-ERF	TF
F01_transcript_21483	AP2/ERF-ERF	TF
F01_transcript_21794	AP2/ERF-ERF	TF
F01_transcript_21960	AP2/ERF-ERF	TF
F01_transcript_22154	AP2/ERF-ERF	TF
F01_transcript_22281	AP2/ERF-ERF	TF
F01_transcript_23046	AP2/ERF-ERF	TF
F01_transcript_23478	AP2/ERF-ERF	TF
F01_transcript_23775	AP2/ERF-ERF	TF
F01_transcript_24067	AP2/ERF-ERF	TF
F01_transcript_24386	AP2/ERF-ERF	TF
F01_transcript_24511	AP2/ERF-ERF	TF
F01_transcript_24695	AP2/ERF-ERF	TF
F01_transcript_24784	AP2/ERF-ERF	TF
F01_transcript_24849	AP2/ERF-ERF	TF
F01_transcript_24909	AP2/ERF-ERF	TF
F01_transcript_25007	AP2/ERF-ERF	TF
F01_transcript_25084	AP2/ERF-ERF	TF
F01_transcript_25196	AP2/ERF-ERF	TF
F01_transcript_25367	AP2/ERF-ERF	TF
F01_transcript_25402	AP2/ERF-ERF	TF
F01_transcript_26931	AP2/ERF-ERF	TF
F01_transcript_28041	AP2/ERF-ERF	TF
F01_transcript_29426	AP2/ERF-ERF	TF
F01_transcript_35948	AP2/ERF-ERF	TF
F01_transcript_36666	AP2/ERF-ERF	TF
F01_transcript_36762	AP2/ERF-ERF	TF
F01_transcript_37048	AP2/ERF-ERF	TF
F01_transcript_38088	AP2/ERF-ERF	TF
F01_transcript_38155	AP2/ERF-ERF	TF
F01_transcript_38210	AP2/ERF-ERF	TF
F01_transcript_38299	AP2/ERF-ERF	TF
F01_transcript_38436	AP2/ERF-ERF	TF
F01_transcript_42817	AP2/ERF-ERF	TF
F01_transcript_43410	AP2/ERF-ERF	TF
F01_transcript_45196	AP2/ERF-ERF	TF
F01_transcript_45362	AP2/ERF-ERF	TF
F01_transcript_45416	AP2/ERF-ERF	TF
F01_transcript_46594	AP2/ERF-ERF	TF
F01_transcript_49695	AP2/ERF-ERF	TF
F01_transcript_50693	AP2/ERF-ERF	TF
F01_transcript_50861	AP2/ERF-ERF	TF
F01_transcript_50890	AP2/ERF-ERF	TF
F01_transcript_51393	AP2/ERF-ERF	TF
F01_transcript_52045	AP2/ERF-ERF	TF
F01_transcript_53910	AP2/ERF-ERF	TF
F01_transcript_54640	AP2/ERF-ERF	TF
F01_transcript_54985	AP2/ERF-ERF	TF
F01_transcript_55392	AP2/ERF-ERF	TF
F01_transcript_55582	AP2/ERF-ERF	TF
F01_transcript_56035	AP2/ERF-ERF	TF
F01_transcript_56320	AP2/ERF-ERF	TF
F01_transcript_57663	AP2/ERF-ERF	TF
F01_transcript_59073	AP2/ERF-ERF	TF
F01_transcript_60202	AP2/ERF-ERF	TF
F01_transcript_60264	AP2/ERF-ERF	TF
F01_transcript_62467	AP2/ERF-ERF	TF
F01_transcript_62553	AP2/ERF-ERF	TF
F01_transcript_62809	AP2/ERF-ERF	TF
F01_transcript_63798	AP2/ERF-ERF	TF
F01_transcript_63962	AP2/ERF-ERF	TF
F01_transcript_64975	AP2/ERF-ERF	TF
F01_transcript_65100	AP2/ERF-ERF	TF
F01_transcript_65803	AP2/ERF-ERF	TF
F01_transcript_65822	AP2/ERF-ERF	TF
F01_transcript_66243	AP2/ERF-ERF	TF
F01_transcript_66320	AP2/ERF-ERF	TF
F01_transcript_67031	AP2/ERF-ERF	TF
F01_transcript_67452	AP2/ERF-ERF	TF
F01_transcript_68326	AP2/ERF-ERF	TF
F01_transcript_6915	AP2/ERF-ERF	TF
F01_transcript_69322	AP2/ERF-ERF	TF
F01_transcript_70208	AP2/ERF-ERF	TF
F01_transcript_7139	AP2/ERF-ERF	TF
F01_transcript_73946	AP2/ERF-ERF	TF
F01_transcript_76358	AP2/ERF-ERF	TF
F01_transcript_77215	AP2/ERF-ERF	TF
F01_transcript_77542	AP2/ERF-ERF	TF
F01_transcript_77789	AP2/ERF-ERF	TF
F01_transcript_77819	AP2/ERF-ERF	TF
F01_transcript_7829	AP2/ERF-ERF	TF
F01_transcript_79567	AP2/ERF-ERF	TF
F01_transcript_79953	AP2/ERF-ERF	TF
F01_transcript_81066	AP2/ERF-ERF	TF
F01_transcript_83145	AP2/ERF-ERF	TF
F01_transcript_85314	AP2/ERF-ERF	TF
F01_transcript_85926	AP2/ERF-ERF	TF
F01_transcript_86880	AP2/ERF-ERF	TF
F01_transcript_87967	AP2/ERF-ERF	TF
F01_transcript_88752	AP2/ERF-ERF	TF
F01_transcript_8917	AP2/ERF-ERF	TF
F01_transcript_92630	AP2/ERF-ERF	TF
F01_transcript_92865	AP2/ERF-ERF	TF
F01_transcript_93863	AP2/ERF-ERF	TF
F01_transcript_94306	AP2/ERF-ERF	TF
F01_transcript_94594	AP2/ERF-ERF	TF
F01_transcript_95113	AP2/ERF-ERF	TF
F01_transcript_97594	AP2/ERF-ERF	TF
F01_transcript_9798	AP2/ERF-ERF	TF
F01_transcript_98921	AP2/ERF-ERF	TF
F01_transcript_98978	AP2/ERF-ERF	TF
F01_transcript_99091	AP2/ERF-ERF	TF
F01_transcript_56354	AP2/ERF-RAV	TF
F01_transcript_59422	AP2/ERF-RAV	TF
F01_transcript_104716	ARID	TR
F01_transcript_11391	ARID	TR
F01_transcript_115058	ARID	TR
F01_transcript_130218	ARID	TR
F01_transcript_137130	ARID	TR
F01_transcript_13818	ARID	TR
F01_transcript_139676	ARID	TR
F01_transcript_20793	ARID	TR
F01_transcript_2341	ARID	TR
F01_transcript_41841	ARID	TR
F01_transcript_42937	ARID	TR
F01_transcript_69547	ARID	TR
F01_transcript_70562	ARID	TR
F01_transcript_73836	ARID	TR
F01_transcript_74137	ARID	TR
F01_transcript_76658	ARID	TR
F01_transcript_81999	ARID	TR
F01_transcript_86077	ARID	TR
F01_transcript_87722	ARID	TR
F01_transcript_90107	ARID	TR
F01_transcript_91347	ARID	TR
F01_transcript_97653	ARID	TR
F01_transcript_55297	Aur	PK
F01_transcript_100220	AUX/IAA	TR
F01_transcript_101095	AUX/IAA	TR
F01_transcript_103468	AUX/IAA	TR
F01_transcript_105526	AUX/IAA	TR
F01_transcript_105910	AUX/IAA	TR
F01_transcript_106512	AUX/IAA	TR
F01_transcript_106534	AUX/IAA	TR
F01_transcript_108386	AUX/IAA	TR
F01_transcript_108525	AUX/IAA	TR
F01_transcript_109710	AUX/IAA	TR
F01_transcript_110082	AUX/IAA	TR
F01_transcript_113027	AUX/IAA	TR
F01_transcript_113210	AUX/IAA	TR
F01_transcript_114868	AUX/IAA	TR
F01_transcript_116882	AUX/IAA	TR
F01_transcript_117885	AUX/IAA	TR
F01_transcript_119381	AUX/IAA	TR
F01_transcript_119578	AUX/IAA	TR
F01_transcript_120532	AUX/IAA	TR
F01_transcript_123969	AUX/IAA	TR
F01_transcript_126163	AUX/IAA	TR
F01_transcript_126412	AUX/IAA	TR
F01_transcript_126853	AUX/IAA	TR
F01_transcript_127493	AUX/IAA	TR
F01_transcript_129089	AUX/IAA	TR
F01_transcript_130570	AUX/IAA	TR
F01_transcript_132107	AUX/IAA	TR
F01_transcript_133845	AUX/IAA	TR
F01_transcript_134915	AUX/IAA	TR
F01_transcript_137437	AUX/IAA	TR
F01_transcript_139476	AUX/IAA	TR
F01_transcript_141363	AUX/IAA	TR
F01_transcript_141447	AUX/IAA	TR
F01_transcript_141888	AUX/IAA	TR
F01_transcript_142700	AUX/IAA	TR
F01_transcript_145090	AUX/IAA	TR
F01_transcript_15155	AUX/IAA	TR
F01_transcript_15685	AUX/IAA	TR
F01_transcript_16326	AUX/IAA	TR
F01_transcript_16387	AUX/IAA	TR
F01_transcript_16513	AUX/IAA	TR
F01_transcript_16893	AUX/IAA	TR
F01_transcript_18187	AUX/IAA	TR
F01_transcript_18390	AUX/IAA	TR
F01_transcript_18403	AUX/IAA	TR
F01_transcript_18711	AUX/IAA	TR
F01_transcript_23695	AUX/IAA	TR
F01_transcript_23958	AUX/IAA	TR
F01_transcript_24269	AUX/IAA	TR
F01_transcript_276	AUX/IAA	TR
F01_transcript_30163	AUX/IAA	TR
F01_transcript_37056	AUX/IAA	TR
F01_transcript_39236	AUX/IAA	TR
F01_transcript_40048	AUX/IAA	TR
F01_transcript_40396	AUX/IAA	TR
F01_transcript_43068	AUX/IAA	TR
F01_transcript_43831	AUX/IAA	TR
F01_transcript_44428	AUX/IAA	TR
F01_transcript_48736	AUX/IAA	TR
F01_transcript_48966	AUX/IAA	TR
F01_transcript_52371	AUX/IAA	TR
F01_transcript_53230	AUX/IAA	TR
F01_transcript_54472	AUX/IAA	TR
F01_transcript_55498	AUX/IAA	TR
F01_transcript_55687	AUX/IAA	TR
F01_transcript_57178	AUX/IAA	TR
F01_transcript_57712	AUX/IAA	TR
F01_transcript_58786	AUX/IAA	TR
F01_transcript_59085	AUX/IAA	TR
F01_transcript_59197	AUX/IAA	TR
F01_transcript_59600	AUX/IAA	TR
F01_transcript_60122	AUX/IAA	TR
F01_transcript_64915	AUX/IAA	TR
F01_transcript_65937	AUX/IAA	TR
F01_transcript_67639	AUX/IAA	TR
F01_transcript_70838	AUX/IAA	TR
F01_transcript_71616	AUX/IAA	TR
F01_transcript_72638	AUX/IAA	TR
F01_transcript_73981	AUX/IAA	TR
F01_transcript_75279	AUX/IAA	TR
F01_transcript_75317	AUX/IAA	TR
F01_transcript_76864	AUX/IAA	TR
F01_transcript_76977	AUX/IAA	TR
F01_transcript_77260	AUX/IAA	TR
F01_transcript_77601	AUX/IAA	TR
F01_transcript_79680	AUX/IAA	TR
F01_transcript_81919	AUX/IAA	TR
F01_transcript_82209	AUX/IAA	TR
F01_transcript_82847	AUX/IAA	TR
F01_transcript_83810	AUX/IAA	TR
F01_transcript_85664	AUX/IAA	TR
F01_transcript_85698	AUX/IAA	TR
F01_transcript_88754	AUX/IAA	TR
F01_transcript_89524	AUX/IAA	TR
F01_transcript_9020	AUX/IAA	TR
F01_transcript_90902	AUX/IAA	TR
F01_transcript_90992	AUX/IAA	TR
F01_transcript_91071	AUX/IAA	TR
F01_transcript_91158	AUX/IAA	TR
F01_transcript_91407	AUX/IAA	TR
F01_transcript_92044	AUX/IAA	TR
F01_transcript_93408	AUX/IAA	TR
F01_transcript_104453	B3	TF
F01_transcript_105904	B3	TF
F01_transcript_105906	B3	TF
F01_transcript_106284	B3	TF
F01_transcript_108718	B3	TF
F01_transcript_109945	B3	TF
F01_transcript_109955	B3	TF
F01_transcript_112855	B3	TF
F01_transcript_115582	B3	TF
F01_transcript_118999	B3	TF
F01_transcript_119606	B3	TF
F01_transcript_122296	B3	TF
F01_transcript_122874	B3	TF
F01_transcript_123094	B3	TF
F01_transcript_127095	B3	TF
F01_transcript_12729	B3	TF
F01_transcript_127653	B3	TF
F01_transcript_128483	B3	TF
F01_transcript_128799	B3	TF
F01_transcript_128858	B3	TF
F01_transcript_1292	B3	TF
F01_transcript_133378	B3	TF
F01_transcript_134334	B3	TF
F01_transcript_137691	B3	TF
F01_transcript_145268	B3	TF
F01_transcript_145655	B3	TF
F01_transcript_145683	B3	TF
F01_transcript_1519	B3	TF
F01_transcript_17488	B3	TF
F01_transcript_19439	B3	TF
F01_transcript_19773	B3	TF
F01_transcript_2005	B3	TF
F01_transcript_20543	B3	TF
F01_transcript_2395	B3	TF
F01_transcript_37666	B3	TF
F01_transcript_43536	B3	TF
F01_transcript_44092	B3	TF
F01_transcript_44303	B3	TF
F01_transcript_47316	B3	TF
F01_transcript_48091	B3	TF
F01_transcript_49808	B3	TF
F01_transcript_50733	B3	TF
F01_transcript_54017	B3	TF
F01_transcript_54061	B3	TF
F01_transcript_58191	B3	TF
F01_transcript_66290	B3	TF
F01_transcript_69644	B3	TF
F01_transcript_78415	B3	TF
F01_transcript_79552	B3	TF
F01_transcript_83249	B3	TF
F01_transcript_84582	B3	TF
F01_transcript_86191	B3	TF
F01_transcript_911	B3	TF
F01_transcript_91489	B3	TF
F01_transcript_91518	B3	TF
F01_transcript_94211	B3	TF
F01_transcript_98703	B3	TF
F01_transcript_99718	B3	TF
F01_transcript_101824	B3-ARF	TF
F01_transcript_104035	B3-ARF	TF
F01_transcript_106343	B3-ARF	TF
F01_transcript_107135	B3-ARF	TF
F01_transcript_1105	B3-ARF	TF
F01_transcript_11095	B3-ARF	TF
F01_transcript_114263	B3-ARF	TF
F01_transcript_12005	B3-ARF	TF
F01_transcript_1214	B3-ARF	TF
F01_transcript_121927	B3-ARF	TF
F01_transcript_124594	B3-ARF	TF
F01_transcript_1255	B3-ARF	TF
F01_transcript_126565	B3-ARF	TF
F01_transcript_127512	B3-ARF	TF
F01_transcript_129133	B3-ARF	TF
F01_transcript_1304	B3-ARF	TF
F01_transcript_132998	B3-ARF	TF
F01_transcript_134069	B3-ARF	TF
F01_transcript_134695	B3-ARF	TF
F01_transcript_1349	B3-ARF	TF
F01_transcript_138387	B3-ARF	TF
F01_transcript_138459	B3-ARF	TF
F01_transcript_140289	B3-ARF	TF
F01_transcript_145643	B3-ARF	TF
F01_transcript_1462	B3-ARF	TF
F01_transcript_1487	B3-ARF	TF
F01_transcript_1562	B3-ARF	TF
F01_transcript_1600	B3-ARF	TF
F01_transcript_1666	B3-ARF	TF
F01_transcript_1681	B3-ARF	TF
F01_transcript_2017	B3-ARF	TF
F01_transcript_213	B3-ARF	TF
F01_transcript_219	B3-ARF	TF
F01_transcript_248	B3-ARF	TF
F01_transcript_306	B3-ARF	TF
F01_transcript_322	B3-ARF	TF
F01_transcript_3243	B3-ARF	TF
F01_transcript_333	B3-ARF	TF
F01_transcript_3345	B3-ARF	TF
F01_transcript_33765	B3-ARF	TF
F01_transcript_34401	B3-ARF	TF
F01_transcript_3518	B3-ARF	TF
F01_transcript_3528	B3-ARF	TF
F01_transcript_3897	B3-ARF	TF
F01_transcript_40956	B3-ARF	TF
F01_transcript_42398	B3-ARF	TF
F01_transcript_4259	B3-ARF	TF
F01_transcript_42631	B3-ARF	TF
F01_transcript_43161	B3-ARF	TF
F01_transcript_47151	B3-ARF	TF
F01_transcript_48095	B3-ARF	TF
F01_transcript_49999	B3-ARF	TF
F01_transcript_52142	B3-ARF	TF
F01_transcript_53001	B3-ARF	TF
F01_transcript_56772	B3-ARF	TF
F01_transcript_58875	B3-ARF	TF
F01_transcript_62032	B3-ARF	TF
F01_transcript_64771	B3-ARF	TF
F01_transcript_70274	B3-ARF	TF
F01_transcript_70414	B3-ARF	TF
F01_transcript_75541	B3-ARF	TF
F01_transcript_76860	B3-ARF	TF
F01_transcript_78396	B3-ARF	TF
F01_transcript_79130	B3-ARF	TF
F01_transcript_80287	B3-ARF	TF
F01_transcript_83896	B3-ARF	TF
F01_transcript_88195	B3-ARF	TF
F01_transcript_88524	B3-ARF	TF
F01_transcript_92030	B3-ARF	TF
F01_transcript_94339	B3-ARF	TF
F01_transcript_95676	B3-ARF	TF
F01_transcript_99296	B3-ARF	TF
F01_transcript_99421	B3-ARF	TF
F01_transcript_11294	BBR-BPC	TF
F01_transcript_123340	BBR-BPC	TF
F01_transcript_13371	BBR-BPC	TF
F01_transcript_135757	BBR-BPC	TF
F01_transcript_142353	BBR-BPC	TF
F01_transcript_143702	BBR-BPC	TF
F01_transcript_145064	BBR-BPC	TF
F01_transcript_15815	BBR-BPC	TF
F01_transcript_19473	BBR-BPC	TF
F01_transcript_20769	BBR-BPC	TF
F01_transcript_39110	BBR-BPC	TF
F01_transcript_51365	BBR-BPC	TF
F01_transcript_52389	BBR-BPC	TF
F01_transcript_54356	BBR-BPC	TF
F01_transcript_57573	BBR-BPC	TF
F01_transcript_58204	BBR-BPC	TF
F01_transcript_60272	BBR-BPC	TF
F01_transcript_62100	BBR-BPC	TF
F01_transcript_62848	BBR-BPC	TF
F01_transcript_64041	BBR-BPC	TF
F01_transcript_76520	BBR-BPC	TF
F01_transcript_77323	BBR-BPC	TF
F01_transcript_88685	BBR-BPC	TF
F01_transcript_90179	BBR-BPC	TF
F01_transcript_96756	BBR-BPC	TF
F01_transcript_111898	BES1	TF
F01_transcript_126843	BES1	TF
F01_transcript_132744	BES1	TF
F01_transcript_140092	BES1	TF
F01_transcript_16019	BES1	TF
F01_transcript_18431	BES1	TF
F01_transcript_18563	BES1	TF
F01_transcript_18827	BES1	TF
F01_transcript_20197	BES1	TF
F01_transcript_3287	BES1	TF
F01_transcript_33611	BES1	TF
F01_transcript_48273	BES1	TF
F01_transcript_53170	BES1	TF
F01_transcript_57029	BES1	TF
F01_transcript_57948	BES1	TF
F01_transcript_63983	BES1	TF
F01_transcript_94145	BES1	TF
F01_transcript_94953	BES1	TF
F01_transcript_96504	BES1	TF
F01_transcript_100014	bHLH	TF
F01_transcript_101948	bHLH	TF
F01_transcript_102302	bHLH	TF
F01_transcript_102482	bHLH	TF
F01_transcript_102636	bHLH	TF
F01_transcript_105391	bHLH	TF
F01_transcript_105898	bHLH	TF
F01_transcript_107297	bHLH	TF
F01_transcript_107683	bHLH	TF
F01_transcript_108950	bHLH	TF
F01_transcript_109539	bHLH	TF
F01_transcript_11022	bHLH	TF
F01_transcript_111282	bHLH	TF
F01_transcript_111395	bHLH	TF
F01_transcript_112506	bHLH	TF
F01_transcript_112538	bHLH	TF
F01_transcript_11257	bHLH	TF
F01_transcript_112652	bHLH	TF
F01_transcript_112936	bHLH	TF
F01_transcript_114030	bHLH	TF
F01_transcript_115277	bHLH	TF
F01_transcript_115583	bHLH	TF
F01_transcript_11593	bHLH	TF
F01_transcript_117735	bHLH	TF
F01_transcript_117847	bHLH	TF
F01_transcript_118219	bHLH	TF
F01_transcript_118656	bHLH	TF
F01_transcript_119548	bHLH	TF
F01_transcript_119632	bHLH	TF
F01_transcript_120860	bHLH	TF
F01_transcript_122060	bHLH	TF
F01_transcript_123021	bHLH	TF
F01_transcript_124174	bHLH	TF
F01_transcript_125671	bHLH	TF
F01_transcript_126462	bHLH	TF
F01_transcript_126918	bHLH	TF
F01_transcript_12782	bHLH	TF
F01_transcript_128514	bHLH	TF
F01_transcript_128522	bHLH	TF
F01_transcript_129860	bHLH	TF
F01_transcript_13041	bHLH	TF
F01_transcript_131242	bHLH	TF
F01_transcript_132310	bHLH	TF
F01_transcript_132644	bHLH	TF
F01_transcript_133063	bHLH	TF
F01_transcript_133935	bHLH	TF
F01_transcript_134748	bHLH	TF
F01_transcript_135701	bHLH	TF
F01_transcript_137243	bHLH	TF
F01_transcript_137937	bHLH	TF
F01_transcript_138465	bHLH	TF
F01_transcript_138648	bHLH	TF
F01_transcript_138792	bHLH	TF
F01_transcript_138876	bHLH	TF
F01_transcript_139390	bHLH	TF
F01_transcript_139885	bHLH	TF
F01_transcript_140324	bHLH	TF
F01_transcript_140986	bHLH	TF
F01_transcript_141529	bHLH	TF
F01_transcript_141559	bHLH	TF
F01_transcript_144722	bHLH	TF
F01_transcript_15931	bHLH	TF
F01_transcript_17219	bHLH	TF
F01_transcript_18032	bHLH	TF
F01_transcript_18505	bHLH	TF
F01_transcript_18990	bHLH	TF
F01_transcript_19500	bHLH	TF
F01_transcript_19797	bHLH	TF
F01_transcript_20194	bHLH	TF
F01_transcript_2049	bHLH	TF
F01_transcript_20877	bHLH	TF
F01_transcript_23334	bHLH	TF
F01_transcript_23337	bHLH	TF
F01_transcript_24342	bHLH	TF
F01_transcript_24361	bHLH	TF
F01_transcript_34755	bHLH	TF
F01_transcript_37299	bHLH	TF
F01_transcript_39360	bHLH	TF
F01_transcript_3951	bHLH	TF
F01_transcript_39839	bHLH	TF
F01_transcript_40754	bHLH	TF
F01_transcript_4130	bHLH	TF
F01_transcript_42050	bHLH	TF
F01_transcript_42672	bHLH	TF
F01_transcript_43242	bHLH	TF
F01_transcript_44135	bHLH	TF
F01_transcript_44712	bHLH	TF
F01_transcript_45310	bHLH	TF
F01_transcript_46112	bHLH	TF
F01_transcript_47445	bHLH	TF
F01_transcript_47981	bHLH	TF
F01_transcript_48313	bHLH	TF
F01_transcript_49153	bHLH	TF
F01_transcript_49318	bHLH	TF
F01_transcript_49443	bHLH	TF
F01_transcript_49586	bHLH	TF
F01_transcript_50506	bHLH	TF
F01_transcript_51115	bHLH	TF
F01_transcript_51137	bHLH	TF
F01_transcript_53241	bHLH	TF
F01_transcript_53848	bHLH	TF
F01_transcript_54530	bHLH	TF
F01_transcript_56582	bHLH	TF
F01_transcript_57649	bHLH	TF
F01_transcript_57931	bHLH	TF
F01_transcript_58343	bHLH	TF
F01_transcript_59341	bHLH	TF
F01_transcript_61704	bHLH	TF
F01_transcript_62936	bHLH	TF
F01_transcript_63340	bHLH	TF
F01_transcript_63563	bHLH	TF
F01_transcript_63855	bHLH	TF
F01_transcript_64443	bHLH	TF
F01_transcript_6453	bHLH	TF
F01_transcript_65750	bHLH	TF
F01_transcript_65814	bHLH	TF
F01_transcript_66106	bHLH	TF
F01_transcript_67339	bHLH	TF
F01_transcript_67444	bHLH	TF
F01_transcript_67448	bHLH	TF
F01_transcript_69444	bHLH	TF
F01_transcript_69498	bHLH	TF
F01_transcript_70669	bHLH	TF
F01_transcript_70750	bHLH	TF
F01_transcript_70919	bHLH	TF
F01_transcript_71059	bHLH	TF
F01_transcript_72473	bHLH	TF
F01_transcript_72906	bHLH	TF
F01_transcript_74175	bHLH	TF
F01_transcript_74406	bHLH	TF
F01_transcript_74960	bHLH	TF
F01_transcript_7552	bHLH	TF
F01_transcript_76346	bHLH	TF
F01_transcript_7661	bHLH	TF
F01_transcript_76933	bHLH	TF
F01_transcript_77454	bHLH	TF
F01_transcript_7756	bHLH	TF
F01_transcript_78819	bHLH	TF
F01_transcript_78889	bHLH	TF
F01_transcript_79540	bHLH	TF
F01_transcript_79739	bHLH	TF
F01_transcript_80297	bHLH	TF
F01_transcript_80506	bHLH	TF
F01_transcript_8089	bHLH	TF
F01_transcript_80945	bHLH	TF
F01_transcript_81378	bHLH	TF
F01_transcript_81737	bHLH	TF
F01_transcript_82522	bHLH	TF
F01_transcript_8360	bHLH	TF
F01_transcript_83989	bHLH	TF
F01_transcript_84512	bHLH	TF
F01_transcript_84770	bHLH	TF
F01_transcript_85900	bHLH	TF
F01_transcript_85964	bHLH	TF
F01_transcript_86078	bHLH	TF
F01_transcript_8680	bHLH	TF
F01_transcript_87445	bHLH	TF
F01_transcript_87525	bHLH	TF
F01_transcript_87824	bHLH	TF
F01_transcript_88949	bHLH	TF
F01_transcript_89109	bHLH	TF
F01_transcript_89822	bHLH	TF
F01_transcript_9015	bHLH	TF
F01_transcript_94047	bHLH	TF
F01_transcript_95283	bHLH	TF
F01_transcript_95848	bHLH	TF
F01_transcript_96247	bHLH	TF
F01_transcript_97209	bHLH	TF
F01_transcript_97410	bHLH	TF
F01_transcript_97963	bHLH	TF
F01_transcript_98084	bHLH	TF
F01_transcript_98567	bHLH	TF
F01_transcript_116548	BSD	TF
F01_transcript_123524	BSD	TF
F01_transcript_133442	BSD	TF
F01_transcript_139310	BUB	PK
F01_transcript_87100	BUB	PK
F01_transcript_100797	bZIP	TF
F01_transcript_101169	bZIP	TF
F01_transcript_102056	bZIP	TF
F01_transcript_104757	bZIP	TF
F01_transcript_106066	bZIP	TF
F01_transcript_10718	bZIP	TF
F01_transcript_109682	bZIP	TF
F01_transcript_110222	bZIP	TF
F01_transcript_111323	bZIP	TF
F01_transcript_11235	bZIP	TF
F01_transcript_11300	bZIP	TF
F01_transcript_113144	bZIP	TF
F01_transcript_113247	bZIP	TF
F01_transcript_113487	bZIP	TF
F01_transcript_114197	bZIP	TF
F01_transcript_115345	bZIP	TF
F01_transcript_116346	bZIP	TF
F01_transcript_116684	bZIP	TF
F01_transcript_118787	bZIP	TF
F01_transcript_119087	bZIP	TF
F01_transcript_11934	bZIP	TF
F01_transcript_119792	bZIP	TF
F01_transcript_121524	bZIP	TF
F01_transcript_121642	bZIP	TF
F01_transcript_121734	bZIP	TF
F01_transcript_121985	bZIP	TF
F01_transcript_124065	bZIP	TF
F01_transcript_127446	bZIP	TF
F01_transcript_128152	bZIP	TF
F01_transcript_12848	bZIP	TF
F01_transcript_128841	bZIP	TF
F01_transcript_129210	bZIP	TF
F01_transcript_129280	bZIP	TF
F01_transcript_12939	bZIP	TF
F01_transcript_129556	bZIP	TF
F01_transcript_130488	bZIP	TF
F01_transcript_13049	bZIP	TF
F01_transcript_130762	bZIP	TF
F01_transcript_13166	bZIP	TF
F01_transcript_131769	bZIP	TF
F01_transcript_132021	bZIP	TF
F01_transcript_133035	bZIP	TF
F01_transcript_135628	bZIP	TF
F01_transcript_137552	bZIP	TF
F01_transcript_139544	bZIP	TF
F01_transcript_140164	bZIP	TF
F01_transcript_143153	bZIP	TF
F01_transcript_143267	bZIP	TF
F01_transcript_143752	bZIP	TF
F01_transcript_14380	bZIP	TF
F01_transcript_143854	bZIP	TF
F01_transcript_143976	bZIP	TF
F01_transcript_143984	bZIP	TF
F01_transcript_145576	bZIP	TF
F01_transcript_14755	bZIP	TF
F01_transcript_14869	bZIP	TF
F01_transcript_14916	bZIP	TF
F01_transcript_15278	bZIP	TF
F01_transcript_15479	bZIP	TF
F01_transcript_16807	bZIP	TF
F01_transcript_17836	bZIP	TF
F01_transcript_19095	bZIP	TF
F01_transcript_19843	bZIP	TF
F01_transcript_20242	bZIP	TF
F01_transcript_20711	bZIP	TF
F01_transcript_21125	bZIP	TF
F01_transcript_21615	bZIP	TF
F01_transcript_22458	bZIP	TF
F01_transcript_22766	bZIP	TF
F01_transcript_22881	bZIP	TF
F01_transcript_24780	bZIP	TF
F01_transcript_29125	bZIP	TF
F01_transcript_3374	bZIP	TF
F01_transcript_34682	bZIP	TF
F01_transcript_35148	bZIP	TF
F01_transcript_35198	bZIP	TF
F01_transcript_35230	bZIP	TF
F01_transcript_35244	bZIP	TF
F01_transcript_35456	bZIP	TF
F01_transcript_35527	bZIP	TF
F01_transcript_36834	bZIP	TF
F01_transcript_37044	bZIP	TF
F01_transcript_37376	bZIP	TF
F01_transcript_37578	bZIP	TF
F01_transcript_38289	bZIP	TF
F01_transcript_39468	bZIP	TF
F01_transcript_39640	bZIP	TF
F01_transcript_39753	bZIP	TF
F01_transcript_42143	bZIP	TF
F01_transcript_4219	bZIP	TF
F01_transcript_42308	bZIP	TF
F01_transcript_42654	bZIP	TF
F01_transcript_43180	bZIP	TF
F01_transcript_44753	bZIP	TF
F01_transcript_44888	bZIP	TF
F01_transcript_4755	bZIP	TF
F01_transcript_50163	bZIP	TF
F01_transcript_50696	bZIP	TF
F01_transcript_50746	bZIP	TF
F01_transcript_51017	bZIP	TF
F01_transcript_52163	bZIP	TF
F01_transcript_53450	bZIP	TF
F01_transcript_54527	bZIP	TF
F01_transcript_54847	bZIP	TF
F01_transcript_54879	bZIP	TF
F01_transcript_5542	bZIP	TF
F01_transcript_56402	bZIP	TF
F01_transcript_57017	bZIP	TF
F01_transcript_5822	bZIP	TF
F01_transcript_58933	bZIP	TF
F01_transcript_59554	bZIP	TF
F01_transcript_60701	bZIP	TF
F01_transcript_60975	bZIP	TF
F01_transcript_62664	bZIP	TF
F01_transcript_66247	bZIP	TF
F01_transcript_66285	bZIP	TF
F01_transcript_6651	bZIP	TF
F01_transcript_66709	bZIP	TF
F01_transcript_67130	bZIP	TF
F01_transcript_67270	bZIP	TF
F01_transcript_68764	bZIP	TF
F01_transcript_6989	bZIP	TF
F01_transcript_71007	bZIP	TF
F01_transcript_71135	bZIP	TF
F01_transcript_71300	bZIP	TF
F01_transcript_71988	bZIP	TF
F01_transcript_73201	bZIP	TF
F01_transcript_73304	bZIP	TF
F01_transcript_75835	bZIP	TF
F01_transcript_76585	bZIP	TF
F01_transcript_78775	bZIP	TF
F01_transcript_8166	bZIP	TF
F01_transcript_81683	bZIP	TF
F01_transcript_83730	bZIP	TF
F01_transcript_83847	bZIP	TF
F01_transcript_84451	bZIP	TF
F01_transcript_84492	bZIP	TF
F01_transcript_85019	bZIP	TF
F01_transcript_86478	bZIP	TF
F01_transcript_86945	bZIP	TF
F01_transcript_87598	bZIP	TF
F01_transcript_87624	bZIP	TF
F01_transcript_87675	bZIP	TF
F01_transcript_88318	bZIP	TF
F01_transcript_88651	bZIP	TF
F01_transcript_88902	bZIP	TF
F01_transcript_89305	bZIP	TF
F01_transcript_91678	bZIP	TF
F01_transcript_92756	bZIP	TF
F01_transcript_93549	bZIP	TF
F01_transcript_93864	bZIP	TF
F01_transcript_94175	bZIP	TF
F01_transcript_96227	bZIP	TF
F01_transcript_96432	bZIP	TF
F01_transcript_96550	bZIP	TF
F01_transcript_9800	bZIP	TF
F01_transcript_9885	bZIP	TF
F01_transcript_100050	C2C2-CO-like	TF
F01_transcript_102008	C2C2-CO-like	TF
F01_transcript_108478	C2C2-CO-like	TF
F01_transcript_123682	C2C2-CO-like	TF
F01_transcript_17058	C2C2-CO-like	TF
F01_transcript_19654	C2C2-CO-like	TF
F01_transcript_19893	C2C2-CO-like	TF
F01_transcript_20721	C2C2-CO-like	TF
F01_transcript_21213	C2C2-CO-like	TF
F01_transcript_50199	C2C2-CO-like	TF
F01_transcript_51297	C2C2-CO-like	TF
F01_transcript_53324	C2C2-CO-like	TF
F01_transcript_65833	C2C2-CO-like	TF
F01_transcript_6770	C2C2-CO-like	TF
F01_transcript_7578	C2C2-CO-like	TF
F01_transcript_90565	C2C2-CO-like	TF
F01_transcript_93996	C2C2-CO-like	TF
F01_transcript_102591	C2C2-Dof	TF
F01_transcript_104122	C2C2-Dof	TF
F01_transcript_10743	C2C2-Dof	TF
F01_transcript_111291	C2C2-Dof	TF
F01_transcript_111833	C2C2-Dof	TF
F01_transcript_115925	C2C2-Dof	TF
F01_transcript_116400	C2C2-Dof	TF
F01_transcript_118552	C2C2-Dof	TF
F01_transcript_121821	C2C2-Dof	TF
F01_transcript_133132	C2C2-Dof	TF
F01_transcript_136730	C2C2-Dof	TF
F01_transcript_139057	C2C2-Dof	TF
F01_transcript_141150	C2C2-Dof	TF
F01_transcript_142363	C2C2-Dof	TF
F01_transcript_18242	C2C2-Dof	TF
F01_transcript_19686	C2C2-Dof	TF
F01_transcript_20156	C2C2-Dof	TF
F01_transcript_20515	C2C2-Dof	TF
F01_transcript_20627	C2C2-Dof	TF
F01_transcript_20854	C2C2-Dof	TF
F01_transcript_21097	C2C2-Dof	TF
F01_transcript_21170	C2C2-Dof	TF
F01_transcript_21526	C2C2-Dof	TF
F01_transcript_34042	C2C2-Dof	TF
F01_transcript_35055	C2C2-Dof	TF
F01_transcript_35674	C2C2-Dof	TF
F01_transcript_37977	C2C2-Dof	TF
F01_transcript_40313	C2C2-Dof	TF
F01_transcript_40935	C2C2-Dof	TF
F01_transcript_49587	C2C2-Dof	TF
F01_transcript_72401	C2C2-Dof	TF
F01_transcript_77755	C2C2-Dof	TF
F01_transcript_7917	C2C2-Dof	TF
F01_transcript_81872	C2C2-Dof	TF
F01_transcript_86445	C2C2-Dof	TF
F01_transcript_86765	C2C2-Dof	TF
F01_transcript_94342	C2C2-Dof	TF
F01_transcript_9658	C2C2-Dof	TF
F01_transcript_96934	C2C2-Dof	TF
F01_transcript_97446	C2C2-Dof	TF
F01_transcript_97692	C2C2-Dof	TF
F01_transcript_97830	C2C2-Dof	TF
F01_transcript_97876	C2C2-Dof	TF
F01_transcript_100649	C2C2-GATA	TF
F01_transcript_102643	C2C2-GATA	TF
F01_transcript_105619	C2C2-GATA	TF
F01_transcript_106676	C2C2-GATA	TF
F01_transcript_107049	C2C2-GATA	TF
F01_transcript_107574	C2C2-GATA	TF
F01_transcript_109791	C2C2-GATA	TF
F01_transcript_109942	C2C2-GATA	TF
F01_transcript_114650	C2C2-GATA	TF
F01_transcript_117341	C2C2-GATA	TF
F01_transcript_117871	C2C2-GATA	TF
F01_transcript_119409	C2C2-GATA	TF
F01_transcript_121699	C2C2-GATA	TF
F01_transcript_121935	C2C2-GATA	TF
F01_transcript_122576	C2C2-GATA	TF
F01_transcript_122989	C2C2-GATA	TF
F01_transcript_126513	C2C2-GATA	TF
F01_transcript_128260	C2C2-GATA	TF
F01_transcript_12872	C2C2-GATA	TF
F01_transcript_129740	C2C2-GATA	TF
F01_transcript_129766	C2C2-GATA	TF
F01_transcript_132927	C2C2-GATA	TF
F01_transcript_135634	C2C2-GATA	TF
F01_transcript_139205	C2C2-GATA	TF
F01_transcript_143249	C2C2-GATA	TF
F01_transcript_18118	C2C2-GATA	TF
F01_transcript_18937	C2C2-GATA	TF
F01_transcript_20715	C2C2-GATA	TF
F01_transcript_21142	C2C2-GATA	TF
F01_transcript_23458	C2C2-GATA	TF
F01_transcript_24377	C2C2-GATA	TF
F01_transcript_26452	C2C2-GATA	TF
F01_transcript_36990	C2C2-GATA	TF
F01_transcript_3833	C2C2-GATA	TF
F01_transcript_38358	C2C2-GATA	TF
F01_transcript_42991	C2C2-GATA	TF
F01_transcript_44966	C2C2-GATA	TF
F01_transcript_46803	C2C2-GATA	TF
F01_transcript_47081	C2C2-GATA	TF
F01_transcript_49120	C2C2-GATA	TF
F01_transcript_49659	C2C2-GATA	TF
F01_transcript_51479	C2C2-GATA	TF
F01_transcript_51484	C2C2-GATA	TF
F01_transcript_53765	C2C2-GATA	TF
F01_transcript_56061	C2C2-GATA	TF
F01_transcript_5616	C2C2-GATA	TF
F01_transcript_57713	C2C2-GATA	TF
F01_transcript_58289	C2C2-GATA	TF
F01_transcript_5920	C2C2-GATA	TF
F01_transcript_60235	C2C2-GATA	TF
F01_transcript_64629	C2C2-GATA	TF
F01_transcript_66333	C2C2-GATA	TF
F01_transcript_71385	C2C2-GATA	TF
F01_transcript_72024	C2C2-GATA	TF
F01_transcript_73733	C2C2-GATA	TF
F01_transcript_74002	C2C2-GATA	TF
F01_transcript_77192	C2C2-GATA	TF
F01_transcript_78334	C2C2-GATA	TF
F01_transcript_81336	C2C2-GATA	TF
F01_transcript_81598	C2C2-GATA	TF
F01_transcript_81749	C2C2-GATA	TF
F01_transcript_82665	C2C2-GATA	TF
F01_transcript_84390	C2C2-GATA	TF
F01_transcript_84633	C2C2-GATA	TF
F01_transcript_86317	C2C2-GATA	TF
F01_transcript_86883	C2C2-GATA	TF
F01_transcript_88516	C2C2-GATA	TF
F01_transcript_95217	C2C2-GATA	TF
F01_transcript_98817	C2C2-GATA	TF
F01_transcript_99850	C2C2-GATA	TF
F01_transcript_13867	C2C2-LSD	TF
F01_transcript_138729	C2C2-LSD	TF
F01_transcript_139834	C2C2-LSD	TF
F01_transcript_23329	C2C2-LSD	TF
F01_transcript_23732	C2C2-LSD	TF
F01_transcript_23735	C2C2-LSD	TF
F01_transcript_34333	C2C2-LSD	TF
F01_transcript_58711	C2C2-LSD	TF
F01_transcript_66981	C2C2-LSD	TF
F01_transcript_67695	C2C2-LSD	TF
F01_transcript_69580	C2C2-LSD	TF
F01_transcript_70007	C2C2-LSD	TF
F01_transcript_80222	C2C2-LSD	TF
F01_transcript_99706	C2C2-LSD	TF
F01_transcript_109126	C2C2-YABBY	TF
F01_transcript_45683	C2C2-YABBY	TF
F01_transcript_100612	C2H2	TF
F01_transcript_102393	C2H2	TF
F01_transcript_103311	C2H2	TF
F01_transcript_105199	C2H2	TF
F01_transcript_105435	C2H2	TF
F01_transcript_110138	C2H2	TF
F01_transcript_111845	C2H2	TF
F01_transcript_112474	C2H2	TF
F01_transcript_113095	C2H2	TF
F01_transcript_113513	C2H2	TF
F01_transcript_113531	C2H2	TF
F01_transcript_114515	C2H2	TF
F01_transcript_115348	C2H2	TF
F01_transcript_115954	C2H2	TF
F01_transcript_116442	C2H2	TF
F01_transcript_116986	C2H2	TF
F01_transcript_117334	C2H2	TF
F01_transcript_117797	C2H2	TF
F01_transcript_118136	C2H2	TF
F01_transcript_12002	C2H2	TF
F01_transcript_121989	C2H2	TF
F01_transcript_122565	C2H2	TF
F01_transcript_123169	C2H2	TF
F01_transcript_124306	C2H2	TF
F01_transcript_125431	C2H2	TF
F01_transcript_127471	C2H2	TF
F01_transcript_127767	C2H2	TF
F01_transcript_127978	C2H2	TF
F01_transcript_128122	C2H2	TF
F01_transcript_128431	C2H2	TF
F01_transcript_129026	C2H2	TF
F01_transcript_129319	C2H2	TF
F01_transcript_131362	C2H2	TF
F01_transcript_135992	C2H2	TF
F01_transcript_136624	C2H2	TF
F01_transcript_139481	C2H2	TF
F01_transcript_139515	C2H2	TF
F01_transcript_140084	C2H2	TF
F01_transcript_142409	C2H2	TF
F01_transcript_144724	C2H2	TF
F01_transcript_14477	C2H2	TF
F01_transcript_16302	C2H2	TF
F01_transcript_16727	C2H2	TF
F01_transcript_17809	C2H2	TF
F01_transcript_18503	C2H2	TF
F01_transcript_18791	C2H2	TF
F01_transcript_19127	C2H2	TF
F01_transcript_19876	C2H2	TF
F01_transcript_20104	C2H2	TF
F01_transcript_20850	C2H2	TF
F01_transcript_21227	C2H2	TF
F01_transcript_21268	C2H2	TF
F01_transcript_21539	C2H2	TF
F01_transcript_21841	C2H2	TF
F01_transcript_22473	C2H2	TF
F01_transcript_234	C2H2	TF
F01_transcript_24100	C2H2	TF
F01_transcript_25105	C2H2	TF
F01_transcript_25370	C2H2	TF
F01_transcript_2654	C2H2	TF
F01_transcript_27066	C2H2	TF
F01_transcript_34006	C2H2	TF
F01_transcript_34213	C2H2	TF
F01_transcript_3470	C2H2	TF
F01_transcript_35912	C2H2	TF
F01_transcript_35972	C2H2	TF
F01_transcript_36617	C2H2	TF
F01_transcript_3698	C2H2	TF
F01_transcript_39986	C2H2	TF
F01_transcript_40435	C2H2	TF
F01_transcript_40537	C2H2	TF
F01_transcript_4120	C2H2	TF
F01_transcript_41837	C2H2	TF
F01_transcript_41895	C2H2	TF
F01_transcript_42136	C2H2	TF
F01_transcript_42569	C2H2	TF
F01_transcript_44849	C2H2	TF
F01_transcript_45275	C2H2	TF
F01_transcript_46104	C2H2	TF
F01_transcript_49369	C2H2	TF
F01_transcript_50028	C2H2	TF
F01_transcript_50977	C2H2	TF
F01_transcript_5150	C2H2	TF
F01_transcript_53766	C2H2	TF
F01_transcript_54018	C2H2	TF
F01_transcript_54142	C2H2	TF
F01_transcript_55052	C2H2	TF
F01_transcript_55768	C2H2	TF
F01_transcript_5578	C2H2	TF
F01_transcript_5661	C2H2	TF
F01_transcript_56777	C2H2	TF
F01_transcript_58741	C2H2	TF
F01_transcript_59247	C2H2	TF
F01_transcript_61494	C2H2	TF
F01_transcript_6248	C2H2	TF
F01_transcript_65326	C2H2	TF
F01_transcript_65848	C2H2	TF
F01_transcript_66574	C2H2	TF
F01_transcript_67419	C2H2	TF
F01_transcript_6781	C2H2	TF
F01_transcript_68211	C2H2	TF
F01_transcript_68623	C2H2	TF
F01_transcript_72049	C2H2	TF
F01_transcript_72179	C2H2	TF
F01_transcript_72184	C2H2	TF
F01_transcript_7322	C2H2	TF
F01_transcript_73779	C2H2	TF
F01_transcript_76179	C2H2	TF
F01_transcript_76799	C2H2	TF
F01_transcript_80191	C2H2	TF
F01_transcript_82597	C2H2	TF
F01_transcript_84468	C2H2	TF
F01_transcript_84702	C2H2	TF
F01_transcript_85441	C2H2	TF
F01_transcript_86676	C2H2	TF
F01_transcript_87079	C2H2	TF
F01_transcript_87922	C2H2	TF
F01_transcript_8811	C2H2	TF
F01_transcript_88394	C2H2	TF
F01_transcript_88569	C2H2	TF
F01_transcript_89516	C2H2	TF
F01_transcript_91972	C2H2	TF
F01_transcript_92265	C2H2	TF
F01_transcript_92623	C2H2	TF
F01_transcript_93155	C2H2	TF
F01_transcript_93954	C2H2	TF
F01_transcript_94097	C2H2	TF
F01_transcript_94515	C2H2	TF
F01_transcript_95604	C2H2	TF
F01_transcript_96628	C2H2	TF
F01_transcript_97877	C2H2	TF
F01_transcript_98114	C2H2	TF
F01_transcript_98847	C2H2	TF
F01_transcript_99281	C2H2	TF
F01_transcript_99755	C2H2	TF
F01_transcript_99999	C2H2	TF
F01_transcript_100121	C3H	TF
F01_transcript_100241	C3H	TF
F01_transcript_100636	C3H	TF
F01_transcript_100998	C3H	TF
F01_transcript_10144	C3H	TF
F01_transcript_101696	C3H	TF
F01_transcript_101731	C3H	TF
F01_transcript_102328	C3H	TF
F01_transcript_102488	C3H	TF
F01_transcript_10401	C3H	TF
F01_transcript_104361	C3H	TF
F01_transcript_104928	C3H	TF
F01_transcript_10544	C3H	TF
F01_transcript_106675	C3H	TF
F01_transcript_10719	C3H	TF
F01_transcript_107438	C3H	TF
F01_transcript_108190	C3H	TF
F01_transcript_108574	C3H	TF
F01_transcript_108575	C3H	TF
F01_transcript_108602	C3H	TF
F01_transcript_108638	C3H	TF
F01_transcript_108702	C3H	TF
F01_transcript_108719	C3H	TF
F01_transcript_109711	C3H	TF
F01_transcript_110043	C3H	TF
F01_transcript_11123	C3H	TF
F01_transcript_112304	C3H	TF
F01_transcript_112907	C3H	TF
F01_transcript_115888	C3H	TF
F01_transcript_116280	C3H	TF
F01_transcript_11660	C3H	TF
F01_transcript_117000	C3H	TF
F01_transcript_117060	C3H	TF
F01_transcript_120097	C3H	TF
F01_transcript_121351	C3H	TF
F01_transcript_122332	C3H	TF
F01_transcript_12269	C3H	TF
F01_transcript_122987	C3H	TF
F01_transcript_123557	C3H	TF
F01_transcript_123983	C3H	TF
F01_transcript_125680	C3H	TF
F01_transcript_125904	C3H	TF
F01_transcript_126159	C3H	TF
F01_transcript_12624	C3H	TF
F01_transcript_126377	C3H	TF
F01_transcript_126882	C3H	TF
F01_transcript_127065	C3H	TF
F01_transcript_127394	C3H	TF
F01_transcript_128059	C3H	TF
F01_transcript_128070	C3H	TF
F01_transcript_128638	C3H	TF
F01_transcript_128728	C3H	TF
F01_transcript_128824	C3H	TF
F01_transcript_129199	C3H	TF
F01_transcript_12921	C3H	TF
F01_transcript_129405	C3H	TF
F01_transcript_129417	C3H	TF
F01_transcript_129746	C3H	TF
F01_transcript_130349	C3H	TF
F01_transcript_130673	C3H	TF
F01_transcript_131383	C3H	TF
F01_transcript_132802	C3H	TF
F01_transcript_135872	C3H	TF
F01_transcript_135940	C3H	TF
F01_transcript_136196	C3H	TF
F01_transcript_13645	C3H	TF
F01_transcript_138419	C3H	TF
F01_transcript_138804	C3H	TF
F01_transcript_139696	C3H	TF
F01_transcript_140197	C3H	TF
F01_transcript_140696	C3H	TF
F01_transcript_141649	C3H	TF
F01_transcript_142076	C3H	TF
F01_transcript_142479	C3H	TF
F01_transcript_142674	C3H	TF
F01_transcript_143352	C3H	TF
F01_transcript_144250	C3H	TF
F01_transcript_145009	C3H	TF
F01_transcript_145254	C3H	TF
F01_transcript_14744	C3H	TF
F01_transcript_14837	C3H	TF
F01_transcript_14930	C3H	TF
F01_transcript_15090	C3H	TF
F01_transcript_15092	C3H	TF
F01_transcript_15378	C3H	TF
F01_transcript_15663	C3H	TF
F01_transcript_159	C3H	TF
F01_transcript_15902	C3H	TF
F01_transcript_16146	C3H	TF
F01_transcript_16198	C3H	TF
F01_transcript_16745	C3H	TF
F01_transcript_16912	C3H	TF
F01_transcript_17244	C3H	TF
F01_transcript_18419	C3H	TF
F01_transcript_19306	C3H	TF
F01_transcript_19494	C3H	TF
F01_transcript_1960	C3H	TF
F01_transcript_2014	C3H	TF
F01_transcript_20201	C3H	TF
F01_transcript_20256	C3H	TF
F01_transcript_2048	C3H	TF
F01_transcript_20809	C3H	TF
F01_transcript_21049	C3H	TF
F01_transcript_22708	C3H	TF
F01_transcript_2323	C3H	TF
F01_transcript_2419	C3H	TF
F01_transcript_2493	C3H	TF
F01_transcript_2633	C3H	TF
F01_transcript_2651	C3H	TF
F01_transcript_270	C3H	TF
F01_transcript_2701	C3H	TF
F01_transcript_2946	C3H	TF
F01_transcript_3091	C3H	TF
F01_transcript_3340	C3H	TF
F01_transcript_3409	C3H	TF
F01_transcript_35104	C3H	TF
F01_transcript_35531	C3H	TF
F01_transcript_357	C3H	TF
F01_transcript_3598	C3H	TF
F01_transcript_3617	C3H	TF
F01_transcript_37031	C3H	TF
F01_transcript_3865	C3H	TF
F01_transcript_39771	C3H	TF
F01_transcript_40079	C3H	TF
F01_transcript_41170	C3H	TF
F01_transcript_41244	C3H	TF
F01_transcript_41400	C3H	TF
F01_transcript_42047	C3H	TF
F01_transcript_43788	C3H	TF
F01_transcript_44645	C3H	TF
F01_transcript_45495	C3H	TF
F01_transcript_4657	C3H	TF
F01_transcript_46630	C3H	TF
F01_transcript_46729	C3H	TF
F01_transcript_47340	C3H	TF
F01_transcript_4871	C3H	TF
F01_transcript_49425	C3H	TF
F01_transcript_49621	C3H	TF
F01_transcript_51713	C3H	TF
F01_transcript_53802	C3H	TF
F01_transcript_54846	C3H	TF
F01_transcript_5490	C3H	TF
F01_transcript_5494	C3H	TF
F01_transcript_56865	C3H	TF
F01_transcript_56955	C3H	TF
F01_transcript_58432	C3H	TF
F01_transcript_59849	C3H	TF
F01_transcript_60033	C3H	TF
F01_transcript_60886	C3H	TF
F01_transcript_61051	C3H	TF
F01_transcript_6109	C3H	TF
F01_transcript_61258	C3H	TF
F01_transcript_6221	C3H	TF
F01_transcript_62256	C3H	TF
F01_transcript_63324	C3H	TF
F01_transcript_64227	C3H	TF
F01_transcript_65071	C3H	TF
F01_transcript_65370	C3H	TF
F01_transcript_6833	C3H	TF
F01_transcript_69345	C3H	TF
F01_transcript_69381	C3H	TF
F01_transcript_69760	C3H	TF
F01_transcript_69858	C3H	TF
F01_transcript_71864	C3H	TF
F01_transcript_72047	C3H	TF
F01_transcript_72356	C3H	TF
F01_transcript_7243	C3H	TF
F01_transcript_72768	C3H	TF
F01_transcript_7293	C3H	TF
F01_transcript_73113	C3H	TF
F01_transcript_73297	C3H	TF
F01_transcript_73645	C3H	TF
F01_transcript_74204	C3H	TF
F01_transcript_74642	C3H	TF
F01_transcript_75888	C3H	TF
F01_transcript_75989	C3H	TF
F01_transcript_76248	C3H	TF
F01_transcript_7662	C3H	TF
F01_transcript_7812	C3H	TF
F01_transcript_79200	C3H	TF
F01_transcript_81540	C3H	TF
F01_transcript_8224	C3H	TF
F01_transcript_82916	C3H	TF
F01_transcript_8302	C3H	TF
F01_transcript_83374	C3H	TF
F01_transcript_83610	C3H	TF
F01_transcript_84940	C3H	TF
F01_transcript_8548	C3H	TF
F01_transcript_85883	C3H	TF
F01_transcript_8635	C3H	TF
F01_transcript_87417	C3H	TF
F01_transcript_87565	C3H	TF
F01_transcript_8770	C3H	TF
F01_transcript_8779	C3H	TF
F01_transcript_87843	C3H	TF
F01_transcript_8840	C3H	TF
F01_transcript_89459	C3H	TF
F01_transcript_89856	C3H	TF
F01_transcript_91166	C3H	TF
F01_transcript_91198	C3H	TF
F01_transcript_91883	C3H	TF
F01_transcript_92742	C3H	TF
F01_transcript_93292	C3H	TF
F01_transcript_93846	C3H	TF
F01_transcript_94706	C3H	TF
F01_transcript_95258	C3H	TF
F01_transcript_95972	C3H	TF
F01_transcript_9701	C3H	TF
F01_transcript_98287	C3H	TF
F01_transcript_98400	C3H	TF
F01_transcript_98846	C3H	TF
F01_transcript_99060	C3H	TF
F01_transcript_104762	CAMK_AMPK	PK
F01_transcript_10520	CAMK_AMPK	PK
F01_transcript_118251	CAMK_AMPK	PK
F01_transcript_12097	CAMK_AMPK	PK
F01_transcript_125429	CAMK_AMPK	PK
F01_transcript_134585	CAMK_AMPK	PK
F01_transcript_138477	CAMK_AMPK	PK
F01_transcript_41478	CAMK_AMPK	PK
F01_transcript_55973	CAMK_AMPK	PK
F01_transcript_59551	CAMK_AMPK	PK
F01_transcript_64751	CAMK_AMPK	PK
F01_transcript_7113	CAMK_AMPK	PK
F01_transcript_7274	CAMK_AMPK	PK
F01_transcript_83097	CAMK_AMPK	PK
F01_transcript_87546	CAMK_AMPK	PK
F01_transcript_9496	CAMK_AMPK	PK
F01_transcript_12555	CAMK_CAMK1-DCAMKL	PK
F01_transcript_75371	CAMK_CAMK1-DCAMKL	PK
F01_transcript_100271	CAMK_CAMKL-CHK1	PK
F01_transcript_10902	CAMK_CAMKL-CHK1	PK
F01_transcript_109466	CAMK_CAMKL-CHK1	PK
F01_transcript_111766	CAMK_CAMKL-CHK1	PK
F01_transcript_112042	CAMK_CAMKL-CHK1	PK
F01_transcript_114292	CAMK_CAMKL-CHK1	PK
F01_transcript_114708	CAMK_CAMKL-CHK1	PK
F01_transcript_115453	CAMK_CAMKL-CHK1	PK
F01_transcript_117393	CAMK_CAMKL-CHK1	PK
F01_transcript_119337	CAMK_CAMKL-CHK1	PK
F01_transcript_120725	CAMK_CAMKL-CHK1	PK
F01_transcript_12341	CAMK_CAMKL-CHK1	PK
F01_transcript_12638	CAMK_CAMKL-CHK1	PK
F01_transcript_127208	CAMK_CAMKL-CHK1	PK
F01_transcript_128026	CAMK_CAMKL-CHK1	PK
F01_transcript_12862	CAMK_CAMKL-CHK1	PK
F01_transcript_130233	CAMK_CAMKL-CHK1	PK
F01_transcript_13070	CAMK_CAMKL-CHK1	PK
F01_transcript_131532	CAMK_CAMKL-CHK1	PK
F01_transcript_13600	CAMK_CAMKL-CHK1	PK
F01_transcript_13881	CAMK_CAMKL-CHK1	PK
F01_transcript_142081	CAMK_CAMKL-CHK1	PK
F01_transcript_14402	CAMK_CAMKL-CHK1	PK
F01_transcript_145435	CAMK_CAMKL-CHK1	PK
F01_transcript_14832	CAMK_CAMKL-CHK1	PK
F01_transcript_15183	CAMK_CAMKL-CHK1	PK
F01_transcript_15409	CAMK_CAMKL-CHK1	PK
F01_transcript_15912	CAMK_CAMKL-CHK1	PK
F01_transcript_16682	CAMK_CAMKL-CHK1	PK
F01_transcript_17079	CAMK_CAMKL-CHK1	PK
F01_transcript_33541	CAMK_CAMKL-CHK1	PK
F01_transcript_34134	CAMK_CAMKL-CHK1	PK
F01_transcript_35296	CAMK_CAMKL-CHK1	PK
F01_transcript_35718	CAMK_CAMKL-CHK1	PK
F01_transcript_36561	CAMK_CAMKL-CHK1	PK
F01_transcript_39958	CAMK_CAMKL-CHK1	PK
F01_transcript_43666	CAMK_CAMKL-CHK1	PK
F01_transcript_43702	CAMK_CAMKL-CHK1	PK
F01_transcript_46359	CAMK_CAMKL-CHK1	PK
F01_transcript_54313	CAMK_CAMKL-CHK1	PK
F01_transcript_58226	CAMK_CAMKL-CHK1	PK
F01_transcript_6050	CAMK_CAMKL-CHK1	PK
F01_transcript_61468	CAMK_CAMKL-CHK1	PK
F01_transcript_61572	CAMK_CAMKL-CHK1	PK
F01_transcript_6496	CAMK_CAMKL-CHK1	PK
F01_transcript_64981	CAMK_CAMKL-CHK1	PK
F01_transcript_71530	CAMK_CAMKL-CHK1	PK
F01_transcript_76379	CAMK_CAMKL-CHK1	PK
F01_transcript_85507	CAMK_CAMKL-CHK1	PK
F01_transcript_85930	CAMK_CAMKL-CHK1	PK
F01_transcript_85941	CAMK_CAMKL-CHK1	PK
F01_transcript_86792	CAMK_CAMKL-CHK1	PK
F01_transcript_89139	CAMK_CAMKL-CHK1	PK
F01_transcript_9030	CAMK_CAMKL-CHK1	PK
F01_transcript_91463	CAMK_CAMKL-CHK1	PK
F01_transcript_9216	CAMK_CAMKL-CHK1	PK
F01_transcript_92418	CAMK_CAMKL-CHK1	PK
F01_transcript_9769	CAMK_CAMKL-CHK1	PK
F01_transcript_98144	CAMK_CAMKL-CHK1	PK
F01_transcript_99614	CAMK_CAMKL-CHK1	PK
F01_transcript_99797	CAMK_CAMKL-CHK1	PK
F01_transcript_100033	CAMK_CAMKL-LKB	PK
F01_transcript_116884	CAMK_CAMKL-LKB	PK
F01_transcript_11751	CAMK_CAMKL-LKB	PK
F01_transcript_117594	CAMK_CAMKL-LKB	PK
F01_transcript_122503	CAMK_CAMKL-LKB	PK
F01_transcript_143932	CAMK_CAMKL-LKB	PK
F01_transcript_144184	CAMK_CAMKL-LKB	PK
F01_transcript_43575	CAMK_CAMKL-LKB	PK
F01_transcript_52486	CAMK_CAMKL-LKB	PK
F01_transcript_58358	CAMK_CAMKL-LKB	PK
F01_transcript_58930	CAMK_CAMKL-LKB	PK
F01_transcript_78876	CAMK_CAMKL-LKB	PK
F01_transcript_85764	CAMK_CAMKL-LKB	PK
F01_transcript_9233	CAMK_CAMKL-LKB	PK
F01_transcript_9765	CAMK_CAMKL-LKB	PK
F01_transcript_100173	CAMK_CDPK	PK
F01_transcript_100692	CAMK_CDPK	PK
F01_transcript_100736	CAMK_CDPK	PK
F01_transcript_101717	CAMK_CDPK	PK
F01_transcript_102713	CAMK_CDPK	PK
F01_transcript_10298	CAMK_CDPK	PK
F01_transcript_103443	CAMK_CDPK	PK
F01_transcript_105675	CAMK_CDPK	PK
F01_transcript_105897	CAMK_CDPK	PK
F01_transcript_106612	CAMK_CDPK	PK
F01_transcript_106725	CAMK_CDPK	PK
F01_transcript_107031	CAMK_CDPK	PK
F01_transcript_107581	CAMK_CDPK	PK
F01_transcript_10767	CAMK_CDPK	PK
F01_transcript_10994	CAMK_CDPK	PK
F01_transcript_110470	CAMK_CDPK	PK
F01_transcript_110696	CAMK_CDPK	PK
F01_transcript_110985	CAMK_CDPK	PK
F01_transcript_111466	CAMK_CDPK	PK
F01_transcript_11367	CAMK_CDPK	PK
F01_transcript_114737	CAMK_CDPK	PK
F01_transcript_114753	CAMK_CDPK	PK
F01_transcript_115150	CAMK_CDPK	PK
F01_transcript_115663	CAMK_CDPK	PK
F01_transcript_11567	CAMK_CDPK	PK
F01_transcript_116131	CAMK_CDPK	PK
F01_transcript_117770	CAMK_CDPK	PK
F01_transcript_118000	CAMK_CDPK	PK
F01_transcript_118871	CAMK_CDPK	PK
F01_transcript_11940	CAMK_CDPK	PK
F01_transcript_119926	CAMK_CDPK	PK
F01_transcript_120843	CAMK_CDPK	PK
F01_transcript_122863	CAMK_CDPK	PK
F01_transcript_126308	CAMK_CDPK	PK
F01_transcript_127435	CAMK_CDPK	PK
F01_transcript_128089	CAMK_CDPK	PK
F01_transcript_129234	CAMK_CDPK	PK
F01_transcript_12928	CAMK_CDPK	PK
F01_transcript_129753	CAMK_CDPK	PK
F01_transcript_13019	CAMK_CDPK	PK
F01_transcript_130219	CAMK_CDPK	PK
F01_transcript_133126	CAMK_CDPK	PK
F01_transcript_133831	CAMK_CDPK	PK
F01_transcript_133985	CAMK_CDPK	PK
F01_transcript_134298	CAMK_CDPK	PK
F01_transcript_136397	CAMK_CDPK	PK
F01_transcript_136792	CAMK_CDPK	PK
F01_transcript_138973	CAMK_CDPK	PK
F01_transcript_139348	CAMK_CDPK	PK
F01_transcript_141613	CAMK_CDPK	PK
F01_transcript_144075	CAMK_CDPK	PK
F01_transcript_144311	CAMK_CDPK	PK
F01_transcript_145127	CAMK_CDPK	PK
F01_transcript_15154	CAMK_CDPK	PK
F01_transcript_15806	CAMK_CDPK	PK
F01_transcript_2503	CAMK_CDPK	PK
F01_transcript_2805	CAMK_CDPK	PK
F01_transcript_2848	CAMK_CDPK	PK
F01_transcript_2910	CAMK_CDPK	PK
F01_transcript_30942	CAMK_CDPK	PK
F01_transcript_35103	CAMK_CDPK	PK
F01_transcript_3543	CAMK_CDPK	PK
F01_transcript_37897	CAMK_CDPK	PK
F01_transcript_38214	CAMK_CDPK	PK
F01_transcript_39318	CAMK_CDPK	PK
F01_transcript_41107	CAMK_CDPK	PK
F01_transcript_42888	CAMK_CDPK	PK
F01_transcript_43109	CAMK_CDPK	PK
F01_transcript_4333	CAMK_CDPK	PK
F01_transcript_47123	CAMK_CDPK	PK
F01_transcript_47491	CAMK_CDPK	PK
F01_transcript_47924	CAMK_CDPK	PK
F01_transcript_49134	CAMK_CDPK	PK
F01_transcript_49344	CAMK_CDPK	PK
F01_transcript_49598	CAMK_CDPK	PK
F01_transcript_51722	CAMK_CDPK	PK
F01_transcript_52167	CAMK_CDPK	PK
F01_transcript_5245	CAMK_CDPK	PK
F01_transcript_53279	CAMK_CDPK	PK
F01_transcript_54541	CAMK_CDPK	PK
F01_transcript_55179	CAMK_CDPK	PK
F01_transcript_56199	CAMK_CDPK	PK
F01_transcript_56985	CAMK_CDPK	PK
F01_transcript_58117	CAMK_CDPK	PK
F01_transcript_5972	CAMK_CDPK	PK
F01_transcript_6037	CAMK_CDPK	PK
F01_transcript_6054	CAMK_CDPK	PK
F01_transcript_6132	CAMK_CDPK	PK
F01_transcript_62222	CAMK_CDPK	PK
F01_transcript_63628	CAMK_CDPK	PK
F01_transcript_6370	CAMK_CDPK	PK
F01_transcript_65336	CAMK_CDPK	PK
F01_transcript_66058	CAMK_CDPK	PK
F01_transcript_6720	CAMK_CDPK	PK
F01_transcript_67306	CAMK_CDPK	PK
F01_transcript_68056	CAMK_CDPK	PK
F01_transcript_6813	CAMK_CDPK	PK
F01_transcript_70157	CAMK_CDPK	PK
F01_transcript_71397	CAMK_CDPK	PK
F01_transcript_71738	CAMK_CDPK	PK
F01_transcript_72133	CAMK_CDPK	PK
F01_transcript_7240	CAMK_CDPK	PK
F01_transcript_72871	CAMK_CDPK	PK
F01_transcript_73301	CAMK_CDPK	PK
F01_transcript_74288	CAMK_CDPK	PK
F01_transcript_7441	CAMK_CDPK	PK
F01_transcript_74840	CAMK_CDPK	PK
F01_transcript_75090	CAMK_CDPK	PK
F01_transcript_75350	CAMK_CDPK	PK
F01_transcript_7594	CAMK_CDPK	PK
F01_transcript_7606	CAMK_CDPK	PK
F01_transcript_76994	CAMK_CDPK	PK
F01_transcript_77246	CAMK_CDPK	PK
F01_transcript_7778	CAMK_CDPK	PK
F01_transcript_78523	CAMK_CDPK	PK
F01_transcript_79295	CAMK_CDPK	PK
F01_transcript_79609	CAMK_CDPK	PK
F01_transcript_80255	CAMK_CDPK	PK
F01_transcript_8035	CAMK_CDPK	PK
F01_transcript_80578	CAMK_CDPK	PK
F01_transcript_8137	CAMK_CDPK	PK
F01_transcript_82239	CAMK_CDPK	PK
F01_transcript_82245	CAMK_CDPK	PK
F01_transcript_82346	CAMK_CDPK	PK
F01_transcript_8270	CAMK_CDPK	PK
F01_transcript_83560	CAMK_CDPK	PK
F01_transcript_84040	CAMK_CDPK	PK
F01_transcript_85493	CAMK_CDPK	PK
F01_transcript_85629	CAMK_CDPK	PK
F01_transcript_85812	CAMK_CDPK	PK
F01_transcript_86169	CAMK_CDPK	PK
F01_transcript_87219	CAMK_CDPK	PK
F01_transcript_87751	CAMK_CDPK	PK
F01_transcript_88112	CAMK_CDPK	PK
F01_transcript_8899	CAMK_CDPK	PK
F01_transcript_89253	CAMK_CDPK	PK
F01_transcript_8928	CAMK_CDPK	PK
F01_transcript_9029	CAMK_CDPK	PK
F01_transcript_9078	CAMK_CDPK	PK
F01_transcript_91026	CAMK_CDPK	PK
F01_transcript_91182	CAMK_CDPK	PK
F01_transcript_91517	CAMK_CDPK	PK
F01_transcript_92358	CAMK_CDPK	PK
F01_transcript_9467	CAMK_CDPK	PK
F01_transcript_9484	CAMK_CDPK	PK
F01_transcript_96009	CAMK_CDPK	PK
F01_transcript_96676	CAMK_CDPK	PK
F01_transcript_9746	CAMK_CDPK	PK
F01_transcript_97927	CAMK_CDPK	PK
F01_transcript_99124	CAMK_CDPK	PK
F01_transcript_103060	CAMK_OST1L	PK
F01_transcript_103118	CAMK_OST1L	PK
F01_transcript_103283	CAMK_OST1L	PK
F01_transcript_110691	CAMK_OST1L	PK
F01_transcript_11372	CAMK_OST1L	PK
F01_transcript_127029	CAMK_OST1L	PK
F01_transcript_127572	CAMK_OST1L	PK
F01_transcript_13015	CAMK_OST1L	PK
F01_transcript_132768	CAMK_OST1L	PK
F01_transcript_134362	CAMK_OST1L	PK
F01_transcript_134571	CAMK_OST1L	PK
F01_transcript_136418	CAMK_OST1L	PK
F01_transcript_138111	CAMK_OST1L	PK
F01_transcript_139434	CAMK_OST1L	PK
F01_transcript_139854	CAMK_OST1L	PK
F01_transcript_141106	CAMK_OST1L	PK
F01_transcript_14927	CAMK_OST1L	PK
F01_transcript_15294	CAMK_OST1L	PK
F01_transcript_15544	CAMK_OST1L	PK
F01_transcript_17813	CAMK_OST1L	PK
F01_transcript_18324	CAMK_OST1L	PK
F01_transcript_18811	CAMK_OST1L	PK
F01_transcript_19103	CAMK_OST1L	PK
F01_transcript_19827	CAMK_OST1L	PK
F01_transcript_20345	CAMK_OST1L	PK
F01_transcript_2372	CAMK_OST1L	PK
F01_transcript_34606	CAMK_OST1L	PK
F01_transcript_35841	CAMK_OST1L	PK
F01_transcript_39802	CAMK_OST1L	PK
F01_transcript_51740	CAMK_OST1L	PK
F01_transcript_54604	CAMK_OST1L	PK
F01_transcript_55752	CAMK_OST1L	PK
F01_transcript_63623	CAMK_OST1L	PK
F01_transcript_64263	CAMK_OST1L	PK
F01_transcript_65047	CAMK_OST1L	PK
F01_transcript_76462	CAMK_OST1L	PK
F01_transcript_76590	CAMK_OST1L	PK
F01_transcript_78776	CAMK_OST1L	PK
F01_transcript_8484	CAMK_OST1L	PK
F01_transcript_85161	CAMK_OST1L	PK
F01_transcript_90964	CAMK_OST1L	PK
F01_transcript_98583	CAMK_OST1L	PK
F01_transcript_101468	CAMTA	TF
F01_transcript_111560	CAMTA	TF
F01_transcript_126355	CAMTA	TF
F01_transcript_143312	CAMTA	TF
F01_transcript_144208	CAMTA	TF
F01_transcript_1558	CAMTA	TF
F01_transcript_420	CAMTA	TF
F01_transcript_68083	CAMTA	TF
F01_transcript_780	CAMTA	TF
F01_transcript_83650	CAMTA	TF
F01_transcript_929	CAMTA	TF
F01_transcript_957	CAMTA	TF
F01_transcript_10013	CK1_CK1	PK
F01_transcript_10068	CK1_CK1	PK
F01_transcript_102566	CK1_CK1	PK
F01_transcript_103338	CK1_CK1	PK
F01_transcript_106692	CK1_CK1	PK
F01_transcript_106721	CK1_CK1	PK
F01_transcript_106812	CK1_CK1	PK
F01_transcript_110495	CK1_CK1	PK
F01_transcript_11155	CK1_CK1	PK
F01_transcript_11313	CK1_CK1	PK
F01_transcript_11332	CK1_CK1	PK
F01_transcript_11433	CK1_CK1	PK
F01_transcript_118709	CK1_CK1	PK
F01_transcript_120798	CK1_CK1	PK
F01_transcript_120806	CK1_CK1	PK
F01_transcript_122134	CK1_CK1	PK
F01_transcript_125705	CK1_CK1	PK
F01_transcript_129579	CK1_CK1	PK
F01_transcript_135134	CK1_CK1	PK
F01_transcript_135985	CK1_CK1	PK
F01_transcript_138473	CK1_CK1	PK
F01_transcript_139615	CK1_CK1	PK
F01_transcript_141342	CK1_CK1	PK
F01_transcript_142394	CK1_CK1	PK
F01_transcript_34105	CK1_CK1	PK
F01_transcript_37899	CK1_CK1	PK
F01_transcript_4717	CK1_CK1	PK
F01_transcript_48870	CK1_CK1	PK
F01_transcript_5145	CK1_CK1	PK
F01_transcript_5539	CK1_CK1	PK
F01_transcript_55572	CK1_CK1	PK
F01_transcript_5632	CK1_CK1	PK
F01_transcript_56477	CK1_CK1	PK
F01_transcript_5708	CK1_CK1	PK
F01_transcript_57384	CK1_CK1	PK
F01_transcript_60896	CK1_CK1	PK
F01_transcript_61105	CK1_CK1	PK
F01_transcript_6398	CK1_CK1	PK
F01_transcript_66080	CK1_CK1	PK
F01_transcript_68247	CK1_CK1	PK
F01_transcript_70447	CK1_CK1	PK
F01_transcript_71096	CK1_CK1	PK
F01_transcript_75238	CK1_CK1	PK
F01_transcript_76604	CK1_CK1	PK
F01_transcript_77847	CK1_CK1	PK
F01_transcript_82394	CK1_CK1	PK
F01_transcript_83060	CK1_CK1	PK
F01_transcript_83266	CK1_CK1	PK
F01_transcript_8398	CK1_CK1	PK
F01_transcript_84110	CK1_CK1	PK
F01_transcript_85413	CK1_CK1	PK
F01_transcript_87302	CK1_CK1	PK
F01_transcript_87710	CK1_CK1	PK
F01_transcript_9084	CK1_CK1	PK
F01_transcript_91106	CK1_CK1	PK
F01_transcript_92271	CK1_CK1	PK
F01_transcript_92664	CK1_CK1	PK
F01_transcript_9331	CK1_CK1	PK
F01_transcript_93720	CK1_CK1	PK
F01_transcript_9616	CK1_CK1	PK
F01_transcript_99989	CK1_CK1	PK
F01_transcript_102254	CK1_CK1-Pl	PK
F01_transcript_105326	CK1_CK1-Pl	PK
F01_transcript_117253	CK1_CK1-Pl	PK
F01_transcript_117933	CK1_CK1-Pl	PK
F01_transcript_120722	CK1_CK1-Pl	PK
F01_transcript_128671	CK1_CK1-Pl	PK
F01_transcript_139632	CK1_CK1-Pl	PK
F01_transcript_2379	CK1_CK1-Pl	PK
F01_transcript_2434	CK1_CK1-Pl	PK
F01_transcript_2682	CK1_CK1-Pl	PK
F01_transcript_2724	CK1_CK1-Pl	PK
F01_transcript_3156	CK1_CK1-Pl	PK
F01_transcript_3266	CK1_CK1-Pl	PK
F01_transcript_3323	CK1_CK1-Pl	PK
F01_transcript_3523	CK1_CK1-Pl	PK
F01_transcript_3565	CK1_CK1-Pl	PK
F01_transcript_37978	CK1_CK1-Pl	PK
F01_transcript_38225	CK1_CK1-Pl	PK
F01_transcript_3878	CK1_CK1-Pl	PK
F01_transcript_39178	CK1_CK1-Pl	PK
F01_transcript_42688	CK1_CK1-Pl	PK
F01_transcript_46148	CK1_CK1-Pl	PK
F01_transcript_51820	CK1_CK1-Pl	PK
F01_transcript_53788	CK1_CK1-Pl	PK
F01_transcript_63360	CK1_CK1-Pl	PK
F01_transcript_63717	CK1_CK1-Pl	PK
F01_transcript_691	CK1_CK1-Pl	PK
F01_transcript_73307	CK1_CK1-Pl	PK
F01_transcript_73565	CK1_CK1-Pl	PK
F01_transcript_76454	CK1_CK1-Pl	PK
F01_transcript_76816	CK1_CK1-Pl	PK
F01_transcript_79146	CK1_CK1-Pl	PK
F01_transcript_80251	CK1_CK1-Pl	PK
F01_transcript_83304	CK1_CK1-Pl	PK
F01_transcript_84851	CK1_CK1-Pl	PK
F01_transcript_91549	CK1_CK1-Pl	PK
F01_transcript_93183	CK1_CK1-Pl	PK
F01_transcript_94708	CK1_CK1-Pl	PK
F01_transcript_97935	CK1_CK1-Pl	PK
F01_transcript_9806	CK1_CK1-Pl	PK
F01_transcript_14940	CMGC_CDK-CCRK	PK
F01_transcript_38110	CMGC_CDK-CCRK	PK
F01_transcript_63837	CMGC_CDK-CCRK	PK
F01_transcript_75407	CMGC_CDK-CCRK	PK
F01_transcript_86412	CMGC_CDK-CCRK	PK
F01_transcript_128256	CMGC_CDK-CDK7	PK
F01_transcript_13642	CMGC_CDK-CDK7	PK
F01_transcript_45769	CMGC_CDK-CDK7	PK
F01_transcript_70651	CMGC_CDK-CDK7	PK
F01_transcript_94350	CMGC_CDK-CDK7	PK
F01_transcript_97127	CMGC_CDK-CDK7	PK
F01_transcript_10518	CMGC_CDK-CDK8	PK
F01_transcript_11371	CMGC_CDK-CDK8	PK
F01_transcript_11994	CMGC_CDK-CDK8	PK
F01_transcript_12435	CMGC_CDK-CDK8	PK
F01_transcript_128500	CMGC_CDK-CDK8	PK
F01_transcript_63071	CMGC_CDK-CDK8	PK
F01_transcript_65509	CMGC_CDK-CDK8	PK
F01_transcript_75841	CMGC_CDK-CDK8	PK
F01_transcript_10049	CMGC_CDK-CRK7-CDK9	PK
F01_transcript_104947	CMGC_CDK-CRK7-CDK9	PK
F01_transcript_10699	CMGC_CDK-CRK7-CDK9	PK
F01_transcript_108907	CMGC_CDK-CRK7-CDK9	PK
F01_transcript_111742	CMGC_CDK-CRK7-CDK9	PK
F01_transcript_112966	CMGC_CDK-CRK7-CDK9	PK
F01_transcript_115752	CMGC_CDK-CRK7-CDK9	PK
F01_transcript_117323	CMGC_CDK-CRK7-CDK9	PK
F01_transcript_11797	CMGC_CDK-CRK7-CDK9	PK
F01_transcript_118940	CMGC_CDK-CRK7-CDK9	PK
F01_transcript_120019	CMGC_CDK-CRK7-CDK9	PK
F01_transcript_123268	CMGC_CDK-CRK7-CDK9	PK
F01_transcript_123371	CMGC_CDK-CRK7-CDK9	PK
F01_transcript_129546	CMGC_CDK-CRK7-CDK9	PK
F01_transcript_130545	CMGC_CDK-CRK7-CDK9	PK
F01_transcript_136975	CMGC_CDK-CRK7-CDK9	PK
F01_transcript_1396	CMGC_CDK-CRK7-CDK9	PK
F01_transcript_140349	CMGC_CDK-CRK7-CDK9	PK
F01_transcript_142290	CMGC_CDK-CRK7-CDK9	PK
F01_transcript_142900	CMGC_CDK-CRK7-CDK9	PK
F01_transcript_144679	CMGC_CDK-CRK7-CDK9	PK
F01_transcript_2083	CMGC_CDK-CRK7-CDK9	PK
F01_transcript_2104	CMGC_CDK-CRK7-CDK9	PK
F01_transcript_2683	CMGC_CDK-CRK7-CDK9	PK
F01_transcript_34995	CMGC_CDK-CRK7-CDK9	PK
F01_transcript_43647	CMGC_CDK-CRK7-CDK9	PK
F01_transcript_44319	CMGC_CDK-CRK7-CDK9	PK
F01_transcript_4486	CMGC_CDK-CRK7-CDK9	PK
F01_transcript_46365	CMGC_CDK-CRK7-CDK9	PK
F01_transcript_52053	CMGC_CDK-CRK7-CDK9	PK
F01_transcript_5264	CMGC_CDK-CRK7-CDK9	PK
F01_transcript_54442	CMGC_CDK-CRK7-CDK9	PK
F01_transcript_60588	CMGC_CDK-CRK7-CDK9	PK
F01_transcript_68815	CMGC_CDK-CRK7-CDK9	PK
F01_transcript_69419	CMGC_CDK-CRK7-CDK9	PK
F01_transcript_70946	CMGC_CDK-CRK7-CDK9	PK
F01_transcript_71435	CMGC_CDK-CRK7-CDK9	PK
F01_transcript_72126	CMGC_CDK-CRK7-CDK9	PK
F01_transcript_73457	CMGC_CDK-CRK7-CDK9	PK
F01_transcript_77475	CMGC_CDK-CRK7-CDK9	PK
F01_transcript_84728	CMGC_CDK-CRK7-CDK9	PK
F01_transcript_84908	CMGC_CDK-CRK7-CDK9	PK
F01_transcript_85727	CMGC_CDK-CRK7-CDK9	PK
F01_transcript_86830	CMGC_CDK-CRK7-CDK9	PK
F01_transcript_89055	CMGC_CDK-CRK7-CDK9	PK
F01_transcript_90149	CMGC_CDK-CRK7-CDK9	PK
F01_transcript_129313	CMGC_CDK-PITSLRE	PK
F01_transcript_138673	CMGC_CDK-PITSLRE	PK
F01_transcript_139115	CMGC_CDK-PITSLRE	PK
F01_transcript_1765	CMGC_CDK-PITSLRE	PK
F01_transcript_1821	CMGC_CDK-PITSLRE	PK
F01_transcript_1923	CMGC_CDK-PITSLRE	PK
F01_transcript_78445	CMGC_CDK-PITSLRE	PK
F01_transcript_88066	CMGC_CDK-PITSLRE	PK
F01_transcript_104849	CMGC_CDK-Pl	PK
F01_transcript_110025	CMGC_CDK-Pl	PK
F01_transcript_118438	CMGC_CDK-Pl	PK
F01_transcript_122837	CMGC_CDK-Pl	PK
F01_transcript_124813	CMGC_CDK-Pl	PK
F01_transcript_125144	CMGC_CDK-Pl	PK
F01_transcript_134932	CMGC_CDK-Pl	PK
F01_transcript_138633	CMGC_CDK-Pl	PK
F01_transcript_2732	CMGC_CDK-Pl	PK
F01_transcript_28733	CMGC_CDK-Pl	PK
F01_transcript_35482	CMGC_CDK-Pl	PK
F01_transcript_43245	CMGC_CDK-Pl	PK
F01_transcript_44479	CMGC_CDK-Pl	PK
F01_transcript_47033	CMGC_CDK-Pl	PK
F01_transcript_53000	CMGC_CDK-Pl	PK
F01_transcript_71656	CMGC_CDK-Pl	PK
F01_transcript_80455	CMGC_CDK-Pl	PK
F01_transcript_81778	CMGC_CDK-Pl	PK
F01_transcript_86706	CMGC_CDK-Pl	PK
F01_transcript_116117	CMGC_CK2	PK
F01_transcript_120357	CMGC_CK2	PK
F01_transcript_121683	CMGC_CK2	PK
F01_transcript_122399	CMGC_CK2	PK
F01_transcript_133996	CMGC_CK2	PK
F01_transcript_134193	CMGC_CK2	PK
F01_transcript_13484	CMGC_CK2	PK
F01_transcript_17073	CMGC_CK2	PK
F01_transcript_17650	CMGC_CK2	PK
F01_transcript_18506	CMGC_CK2	PK
F01_transcript_18838	CMGC_CK2	PK
F01_transcript_19090	CMGC_CK2	PK
F01_transcript_19916	CMGC_CK2	PK
F01_transcript_20187	CMGC_CK2	PK
F01_transcript_20364	CMGC_CK2	PK
F01_transcript_45356	CMGC_CK2	PK
F01_transcript_47217	CMGC_CK2	PK
F01_transcript_58354	CMGC_CK2	PK
F01_transcript_60426	CMGC_CK2	PK
F01_transcript_72421	CMGC_CK2	PK
F01_transcript_73465	CMGC_CK2	PK
F01_transcript_84822	CMGC_CK2	PK
F01_transcript_84931	CMGC_CK2	PK
F01_transcript_95802	CMGC_CK2	PK
F01_transcript_102813	CMGC_CLK	PK
F01_transcript_103733	CMGC_CLK	PK
F01_transcript_112712	CMGC_CLK	PK
F01_transcript_113484	CMGC_CLK	PK
F01_transcript_114092	CMGC_CLK	PK
F01_transcript_115387	CMGC_CLK	PK
F01_transcript_116555	CMGC_CLK	PK
F01_transcript_122825	CMGC_CLK	PK
F01_transcript_125373	CMGC_CLK	PK
F01_transcript_130663	CMGC_CLK	PK
F01_transcript_132413	CMGC_CLK	PK
F01_transcript_133926	CMGC_CLK	PK
F01_transcript_137513	CMGC_CLK	PK
F01_transcript_137950	CMGC_CLK	PK
F01_transcript_139085	CMGC_CLK	PK
F01_transcript_142835	CMGC_CLK	PK
F01_transcript_143133	CMGC_CLK	PK
F01_transcript_14525	CMGC_CLK	PK
F01_transcript_16451	CMGC_CLK	PK
F01_transcript_17764	CMGC_CLK	PK
F01_transcript_19094	CMGC_CLK	PK
F01_transcript_21243	CMGC_CLK	PK
F01_transcript_2287	CMGC_CLK	PK
F01_transcript_39108	CMGC_CLK	PK
F01_transcript_40107	CMGC_CLK	PK
F01_transcript_41335	CMGC_CLK	PK
F01_transcript_50239	CMGC_CLK	PK
F01_transcript_67334	CMGC_CLK	PK
F01_transcript_67716	CMGC_CLK	PK
F01_transcript_76323	CMGC_CLK	PK
F01_transcript_79817	CMGC_CLK	PK
[truncated: 4,815 more rows]
