# Supplementary material for: A bZIP transcription factor, PqbZIP1, is involved in the plant defense response of American ginseng
Source: PeerJ. 2022 Mar 8;10:e12939. doi: 10.7717/peerj.12939 (PMC8916028; doi:10.7717/peerj.12939)
Supplement: Supplemental Information 16 [file peerj-10-12939-s016.xlsx]

## Sheet: Sheet1
Table S12. Primers used in this study
Primers	sequence
qPCR-PqbZIP1-F	GGTTCTTTAGCATTACCTCGGAC
qPCR-PqbZIP1-R	CATTCGCACTCCCAACCTTT
qPCR-GAPDH-F	CAAAGACTGGAGAGGTGGAAGAG
qPCR-GAPDH-R	TGCAGGTAGCACTTTACCAACAG
Q-PqbZIP1-F	ATGGGGTCTTACATAAATTTC
Q-PqbZIP1-R	CTACCAAGGTCCTGTCAGTG
PqbZIP1-F	ATGGGGTCTTACATAAATTTC
PqbZIP1-R	CCAAGGTCCTGTCAGTGTC
